# Supplementary material for: Long-read Ribo-STAMP simultaneously measures transcription and translation with isoform resolution
Source: HighWire-hosted journal article supplement (doi:10.1101/gr.279176.124), 2024-06-21
Supplement: Supplemental_Table_1.xlsx [file Supplemental_Table_1.xlsx]

## Sheet: Description
Supplemental Table 1: Isoform-level edits called for LR-Ribo-STAMP and long-read APOBEC1 only samples generated from HEK293T cells

## Sheet: APOBEC1-only_rep1
chr1	52285506	52285507	ENSG00000078618.15:ENST00000352171.7:chr1:52285506:-	1,80	-
chr1	52280232	52280233	ENSG00000078618.15:ENST00000352171.7:chr1:52280232:-	1,80	-
chr1	52280266	52280267	ENSG00000078618.15:ENST00000352171.7:chr1:52280266:-	1,80	-
chr1	52271197	52271198	ENSG00000078618.15:ENST00000352171.7:chr1:52271197:-	1,78	-
chr1	52269592	52269593	ENSG00000078618.15:ENST00000352171.7:chr1:52269592:-	1,78	-
chr2	17913098	17913099	ENSG00000163029.11:ENST00000351948.4:chr2:17913098:-	1,25	-
chr3	184039150	184039151	ENSG00000114867.15:ENST00000346169.2:chr3:184039150:+	1,68	+
chr3	184041659	184041660	ENSG00000114867.15:ENST00000346169.2:chr3:184041659:+	1,67	+
chr6	108882424	108882425	ENSG00000118689.10:ENST00000343882.6:chr6:108882424:+	1,13	+
chr7	99490325	99490326	ENSG00000146833.11:ENST00000349062.2:chr7:99490325:-	1,19	-
chr10	16796924	16796925	ENSG00000148484.13:ENST00000345264.5:chr10:16796924:-	1,25	-
chr10	96334427	96334428	ENSG00000119969.10:ENST00000348459.5:chr10:96334427:+	1,24	+
chr10	96342812	96342813	ENSG00000119969.10:ENST00000348459.5:chr10:96342812:+	1,24	+
chr12	21795011	21795012	ENSG00000111716.8:ENST00000350669.1:chr12:21795011:-	1501	-
chr12	115120749	115120750	ENSG00000135111.10:ENST00000349155.2:chr12:115120749:-	1,11	-
chr12	115114172	115114173	ENSG00000135111.10:ENST00000349155.2:chr12:115114172:-	1,11	-
chr13	37593493	37593494	ENSG00000102710.15:ENST00000350612.6:chr13:37593493:-	1,1	-
chr15	101170079	101170080	ENSG00000183475.8:ENST00000343276.4:chr15:101170079:+	1,2	+
chr19	803633	803634	ENSG00000011304.12:ENST00000349038.4:chr19:803633:+	1,56	+
chr19	805013	805014	ENSG00000011304.12:ENST00000349038.4:chr19:805013:+	1,60	+
chr19	810804	810805	ENSG00000011304.12:ENST00000349038.4:chr19:810804:+	1,60	+
chr19	2130485	2130486	ENSG00000065000.11:ENST00000345016.5:chr19:2130485:-	1117	-
chr19	2123357	2123358	ENSG00000065000.11:ENST00000345016.5:chr19:2123357:-	1117	-
chr19	2118616	2118617	ENSG00000065000.11:ENST00000345016.5:chr19:2118616:-	1117	-
chr19	2118776	2118777	ENSG00000065000.11:ENST00000345016.5:chr19:2118776:-	1117	-
chr19	2116737	2116738	ENSG00000065000.11:ENST00000345016.5:chr19:2116737:-	1117	-
chr19	2114252	2114253	ENSG00000065000.11:ENST00000345016.5:chr19:2114252:-	1116	-
chr19	50412703	50412704	ENSG00000213024.6:ENST00000352066.3:chr19:50412703:-	1,5	-
chr20	45891141	45891142	ENSG00000101040.15:ENST00000352431.2:chr20:45891141:-	1,6	-
chr22	31731756	31731757	ENSG00000100105.13:ENST00000351933.4:chr22:31731756:-	1,6	-
chr6	136589423	136589424	ENSG00000029363.11:ENST00000531224.1:chr6:136589423:-	1,74	-
chr6	136582525	136582526	ENSG00000029363.11:ENST00000531224.1:chr6:136582525:-	1,73	-
chr22	29678471	29678472	ENSG00000182944.13:ENST00000406548.1:chr22:29678471:+	1104	+
chr22	29694855	29694856	ENSG00000182944.13:ENST00000406548.1:chr22:29694855:+	1104	+
chr22	29695736	29695737	ENSG00000182944.13:ENST00000406548.1:chr22:29695736:+	1104	+
chr22	29695773	29695774	ENSG00000182944.13:ENST00000406548.1:chr22:29695773:+	1104	+
chr2	15737574	15737575	ENSG00000079785.10:ENST00000381341.2:chr2:15737574:+	1,43	+
chr2	15760464	15760465	ENSG00000079785.10:ENST00000381341.2:chr2:15760464:+	1,43	+
chr2	26455055	26455056	ENSG00000084754.6:ENST00000380649.3:chr2:26455055:-	1110	-
chr2	26432745	26432746	ENSG00000084754.6:ENST00000380649.3:chr2:26432745:-	1110	-
chr2	26414433	26414434	ENSG00000084754.6:ENST00000380649.3:chr2:26414433:-	1112	-
chr2	26414175	26414176	ENSG00000084754.6:ENST00000380649.3:chr2:26414175:-	1112	-
chr4	56262412	56262413	ENSG00000134851.8:ENST00000381334.5:chr4:56262412:+	1,21	+
chr5	41904554	41904555	ENSG00000205765.4:ENST00000381647.2:chr5:41904554:+	1,19	+
chr8	22269700	22269701	ENSG00000104635.9:ENST00000381237.1:chr8:22269700:+	1,56	+
chr10	3177996	3177997	ENSG00000067057.12:ENST00000381125.4:chr10:3177996:+	1,74	+
chr17	4458491	4458492	ENSG00000132382.10:ENST00000381556.2:chr17:4458491:-	1,10	-
chr21	34901200	34901201	ENSG00000159131.12:ENST00000381815.4:chr21:34901200:-	1178	-
chr21	34883745	34883746	ENSG00000159131.12:ENST00000381815.4:chr21:34883745:-	1178	-
chr21	34876495	34876496	ENSG00000159131.12:ENST00000381815.4:chr21:34876495:-	1174	-
chrX	1510819	1510820	ENSG00000169100.8:ENST00000381401.5:chrX:1510819:-	1,14	-
chr8	145753012	145753013	ENSG00000213563.2:ENST00000534680.1:chr8:145753012:-	1,3	-
chr11	209865	209866	ENSG00000177963.8:ENST00000526104.1:chr11:209865:+	1,63	+
chr11	209917	209918	ENSG00000177963.8:ENST00000526104.1:chr11:209917:+	1,62	+
chr11	32616515	32616516	ENSG00000149100.8:ENST00000531120.1:chr11:32616515:+	4,64	+
chr11	46801841	46801842	ENSG00000175216.10:ENST00000529230.1:chr11:46801841:-	1,33	-
chr11	134047145	134047146	ENSG00000151503.8:ENST00000534548.2:chr11:134047145:-	1,83	-
chr11	134038405	134038406	ENSG00000151503.8:ENST00000534548.2:chr11:134038405:-	1,83	-
chr15	49170807	49170808	ENSG00000255302.3:ENST00000530028.2:chr15:49170807:+	1,59	+
chr15	49170865	49170866	ENSG00000255302.3:ENST00000530028.2:chr15:49170865:+	1,59	+
chr19	37698009	37698010	ENSG00000245680.5:ENST00000532828.2:chr19:37698009:-	1,1	-
chr1	1167907	1167908	ENSG00000176022.3:ENST00000379198.2:chr1:1167907:+	1,29	+
chr1	1168134	1168135	ENSG00000176022.3:ENST00000379198.2:chr1:1168134:+	1,29	+
chr1	1452776	1452777	ENSG00000197785.9:ENST00000378756.3:chr1:1452776:+	1,20	+
chr1	1458905	1458906	ENSG00000197785.9:ENST00000378756.3:chr1:1458905:+	1,20	+
chr1	2077503	2077504	ENSG00000067606.11:ENST00000378567.3:chr1:2077503:+	1,7	+
chr1	2442818	2442819	ENSG00000157881.9:ENST00000378466.3:chr1:2442818:-	1,18	-
chr1	2440416	2440417	ENSG00000157881.9:ENST00000378466.3:chr1:2440416:-	1,18	-
chr1	3712773	3712774	ENSG00000130764.5:ENST00000378251.1:chr1:3712773:-	1,44	-
chr1	3699257	3699258	ENSG00000130764.5:ENST00000378251.1:chr1:3699257:-	2,48	-
chr1	3754072	3754073	ENSG00000116198.8:ENST00000378230.3:chr1:3754072:-	1,30	-
chr5	132202662	132202663	ENSG00000164405.6:ENST00000378670.3:chr5:132202662:+	1,9	+
chr8	120801954	120801955	ENSG00000064313.7:ENST00000378164.2:chr8:120801954:-	1,40	-
chr9	35075734	35075735	ENSG00000221829.5:ENST00000378643.3:chr9:35075734:-	1,7	-
chr10	13237136	13237137	ENSG00000065328.12:ENST00000378714.3:chr10:13237136:+	1118	+
chr11	27407013	27407014	ENSG00000205213.9:ENST00000379214.4:chr11:27407013:-	1,11	-
chr11	27395545	27395546	ENSG00000205213.9:ENST00000379214.4:chr11:27395545:-	1,11	-
chr11	43345102	43345103	ENSG00000166181.8:ENST00000378852.3:chr11:43345102:+	1247	+
chr11	43345122	43345123	ENSG00000166181.8:ENST00000378852.3:chr11:43345122:+	1247	+
chr11	43356846	43356847	ENSG00000166181.8:ENST00000378852.3:chr11:43356846:+	1252	+
chr11	47861481	47861482	ENSG00000030066.9:ENST00000378460.2:chr11:47861481:-	1,62	-
chr11	47819404	47819405	ENSG00000030066.9:ENST00000378460.2:chr11:47819404:-	1,68	-
chr16	71954700	71954701	ENSG00000182149.16:ENST00000378799.6:chr16:71954700:+	1,82	+
chrX	38540530	38540531	ENSG00000156298.8:ENST00000378482.2:chrX:38540530:+	1,12	+
chrX	40450606	40450607	ENSG00000182220.9:ENST00000378438.4:chrX:40450606:+	1115	+
chrX	40456896	40456897	ENSG00000182220.9:ENST00000378438.4:chrX:40456896:+	1115	+
chr2	202272228	202272229	ENSG00000115993.7:ENST00000332624.3:chr2:202272228:-	1,20	-
chr2	202260124	202260125	ENSG00000115993.7:ENST00000332624.3:chr2:202260124:-	1,20	-
chr2	202245938	202245939	ENSG00000115993.7:ENST00000332624.3:chr2:202245938:-	1,21	-
chr3	139094381	139094382	ENSG00000184432.5:ENST00000333188.5:chr3:139094381:-	1242	-
chr3	139094439	139094440	ENSG00000184432.5:ENST00000333188.5:chr3:139094439:-	1242	-
chr3	139093377	139093378	ENSG00000184432.5:ENST00000333188.5:chr3:139093377:-	1242	-
chr3	139093383	139093384	ENSG00000184432.5:ENST00000333188.5:chr3:139093383:-	1242	-
chr3	139086992	139086993	ENSG00000184432.5:ENST00000333188.5:chr3:139086992:-	1242	-
chr3	139085924	139085925	ENSG00000184432.5:ENST00000333188.5:chr3:139085924:-	1242	-
chr3	139077911	139077912	ENSG00000184432.5:ENST00000333188.5:chr3:139077911:-	1243	-
chr4	22438064	22438065	ENSG00000152990.9:ENST00000334304.5:chr4:22438064:-	1,6	-
chr5	78742936	78742937	ENSG00000152413.10:ENST00000334082.6:chr5:78742936:-	1,35	-
chr8	124810361	124810362	ENSG00000176853.11:ENST00000334705.7:chr8:124810361:+	1,50	+
chr9	26884878	26884879	ENSG00000120159.7:ENST00000333916.5:chr9:26884878:-	1,30	-
chr10	99190188	99190189	ENSG00000171314.8:ENST00000334828.5:chr10:99190188:+	1279	+
chr10	112038967	112038968	ENSG00000119950.16:ENST00000332674.5:chr10:112038967:+	1,15	+
chr10	119134050	119134051	ENSG00000165650.7:ENST00000334464.5:chr10:119134050:-	1,33	-
chr11	33079478	33079479	ENSG00000176148.11:ENST00000334274.4:chr11:33079478:+	1,2	+
chr12	22637766	22637767	ENSG00000111731.8:ENST00000333957.4:chr12:22637766:-	1,2	-
chr12	46211555	46211556	ENSG00000189079.11:ENST00000334344.6:chr12:46211555:+	1,8	+
chr12	46244225	46244226	ENSG00000189079.11:ENST00000334344.6:chr12:46244225:+	1,10	+
chr12	46245822	46245823	ENSG00000189079.11:ENST00000334344.6:chr12:46245822:+	1,10	+
chr15	89169885	89169886	ENSG00000181026.13:ENST00000332810.3:chr15:89169885:+	1114	+
chr15	91548938	91548939	ENSG00000184056.10:ENST00000333371.3:chr15:91548938:-	1,9	-
chr16	2264042	2264043	ENSG00000184207.8:ENST00000333503.7:chr16:2264042:-	1,10	-
chr21	43166775	43166776	ENSG00000183421.7:ENST00000332512.3:chr21:43166775:-	1,5	-
chr22	30416521	30416522	ENSG00000100330.11:ENST00000333027.3:chr22:30416521:+	1,4	+
chr7	19737943	19737944	ENSG00000105849.5:ENST00000222567.5:chr7:19737943:-	1,32	-
chr7	30062374	30062375	ENSG00000106080.6:ENST00000222803.5:chr7:30062374:-	1,18	-
chr7	105909719	105909720	ENSG00000105835.7:ENST00000222553.3:chr7:105909719:-	1,46	-
chr7	107600968	107600969	ENSG00000091136.9:ENST00000222399.6:chr7:107600968:-	1,4	-
chr7	127955023	127955024	ENSG00000106344.4:ENST00000223073.2:chr7:127955023:-	1,46	-
chr10	3208508	3208509	ENSG00000107959.11:ENST00000224949.4:chr10:3208508:-	1,73	-
chr10	3207493	3207494	ENSG00000107959.11:ENST00000224949.4:chr10:3207493:-	1,73	-
chr10	3202455	3202456	ENSG00000107959.11:ENST00000224949.4:chr10:3202455:-	1,74	-
chr10	3201161	3201162	ENSG00000107959.11:ENST00000224949.4:chr10:3201161:-	1,73	-
chr10	3191844	3191845	ENSG00000107959.11:ENST00000224949.4:chr10:3191844:-	1,75	-
chr10	3191862	3191863	ENSG00000107959.11:ENST00000224949.4:chr10:3191862:-	1,75	-
chr10	81107417	81107418	ENSG00000108179.9:ENST00000225174.3:chr10:81107417:+	1,50	+
chr17	5342313	5342314	ENSG00000108561.4:ENST00000225698.4:chr17:5342313:-	1,89	-
chr17	5342333	5342334	ENSG00000108561.4:ENST00000225698.4:chr17:5342333:-	1,89	-
chr17	46019056	46019057	ENSG00000108439.5:ENST00000225573.4:chr17:46019056:+	1,21	+
chr17	46024054	46024055	ENSG00000108439.5:ENST00000225573.4:chr17:46024054:+	1,30	+
chr17	49350776	49350777	ENSG00000011260.9:ENST00000225298.7:chr17:49350776:+	1,77	+
chr17	49365499	49365500	ENSG00000011260.9:ENST00000225298.7:chr17:49365499:+	1,77	+
chr17	49365500	49365501	ENSG00000011260.9:ENST00000225298.7:chr17:49365500:+	1,77	+
chr17	62502223	62502224	ENSG00000108654.7:ENST00000225792.5:chr17:62502223:-	1366	-
chr17	62499673	62499674	ENSG00000108654.7:ENST00000225792.5:chr17:62499673:-	1368	-
chr17	62496668	62496669	ENSG00000108654.7:ENST00000225792.5:chr17:62496668:-	1368	-
chr17	62496693	62496694	ENSG00000108654.7:ENST00000225792.5:chr17:62496693:-	1368	-
chr17	62496394	62496395	ENSG00000108654.7:ENST00000225792.5:chr17:62496394:-	1368	-
chr17	62496408	62496409	ENSG00000108654.7:ENST00000225792.5:chr17:62496408:-	1368	-
chr19	10502250	10502251	ENSG00000105401.2:ENST00000222005.2:chr19:10502250:-	1,13	-
chr19	18266833	18266834	ENSG00000105647.10:ENST00000222254.8:chr19:18266833:+	1,7	+
chr19	39406938	39406939	ENSG00000104835.10:ENST00000221431.6:chr19:39406938:-	1,4	-
chr19	41838065	41838066	ENSG00000105329.5:ENST00000221930.5:chr19:41838065:-	1,1	-
chr2	111427064	111427065	ENSG00000169679.10:ENST00000302759.6:chr2:111427064:-	1131	-
chr3	39116249	39116250	ENSG00000114742.9:ENST00000302313.5:chr3:39116249:+	1,22	+
chr3	39129665	39129666	ENSG00000114742.9:ENST00000302313.5:chr3:39129665:+	1,22	+
chr3	39129683	39129684	ENSG00000114742.9:ENST00000302313.5:chr3:39129683:+	1,22	+
chr3	39453795	39453796	ENSG00000168028.9:ENST00000301821.6:chr3:39453795:+	1,14	+
chr4	1817445	1817446	ENSG00000168924.10:ENST00000302787.2:chr4:1817445:-	1,67	-
chr8	27690618	27690619	ENSG00000168078.5:ENST00000301905.4:chr8:27690618:-	1,57	-
chr10	32327131	32327132	ENSG00000170759.10:ENST00000302418.4:chr10:32327131:-	1,58	-
chr10	32326449	32326450	ENSG00000170759.10:ENST00000302418.4:chr10:32326449:-	1,58	-
chr11	61099028	61099029	ENSG00000167986.9:ENST00000301764.7:chr11:61099028:-	1269	-
chr11	61097492	61097493	ENSG00000167986.9:ENST00000301764.7:chr11:61097492:-	1273	-
chr11	61094278	61094279	ENSG00000167986.9:ENST00000301764.7:chr11:61094278:-	1278	-
chr11	61089824	61089825	ENSG00000167986.9:ENST00000301764.7:chr11:61089824:-	1286	-
chr11	61089857	61089858	ENSG00000167986.9:ENST00000301764.7:chr11:61089857:-	1285	-
chr11	61081640	61081641	ENSG00000167986.9:ENST00000301764.7:chr11:61081640:-	1298	-
chr11	61081026	61081027	ENSG00000167986.9:ENST00000301764.7:chr11:61081026:-	1302	-
chr11	61081109	61081110	ENSG00000167986.9:ENST00000301764.7:chr11:61081109:-	1302	-
chr11	61077283	61077284	ENSG00000167986.9:ENST00000301764.7:chr11:61077283:-	1306	-
chr11	61071408	61071409	ENSG00000167986.9:ENST00000301764.7:chr11:61071408:-	2306	-
chr11	61071498	61071499	ENSG00000167986.9:ENST00000301764.7:chr11:61071498:-	1305	-
chr11	61070080	61070081	ENSG00000167986.9:ENST00000301764.7:chr11:61070080:-	1306	-
chr11	61069805	61069806	ENSG00000167986.9:ENST00000301764.7:chr11:61069805:-	1306	-
chr16	2812933	2812934	ENSG00000167978.12:ENST00000301740.8:chr16:2812933:+	1,2	+
chr16	2816296	2816297	ENSG00000167978.12:ENST00000301740.8:chr16:2816296:+	1,5	+
chr16	2816987	2816988	ENSG00000167978.12:ENST00000301740.8:chr16:2816987:+	1,7	+
chr16	70405368	70405369	ENSG00000168872.11:ENST00000302243.7:chr16:70405368:+	1,80	+
chr16	70562935	70562936	ENSG00000189091.8:ENST00000302516.5:chr16:70562935:+	1199	+
chr16	70572274	70572275	ENSG00000189091.8:ENST00000302516.5:chr16:70572274:+	1202	+
chr16	70573021	70573022	ENSG00000189091.8:ENST00000302516.5:chr16:70573021:+	1205	+
chr16	70573107	70573108	ENSG00000189091.8:ENST00000302516.5:chr16:70573107:+	1205	+
chr16	70582296	70582297	ENSG00000189091.8:ENST00000302516.5:chr16:70582296:+	1207	+
chr16	70588460	70588461	ENSG00000189091.8:ENST00000302516.5:chr16:70588460:+	1208	+
chr16	70590206	70590207	ENSG00000189091.8:ENST00000302516.5:chr16:70590206:+	1211	+
chr16	70601418	70601419	ENSG00000189091.8:ENST00000302516.5:chr16:70601418:+	1217	+
chr16	70603975	70603976	ENSG00000189091.8:ENST00000302516.5:chr16:70603975:+	1218	+
chr16	70605593	70605594	ENSG00000189091.8:ENST00000302516.5:chr16:70605593:+	1218	+
chr17	2238631	2238632	ENSG00000167721.6:ENST00000301364.5:chr17:2238631:-	1139	-
chr17	2238635	2238636	ENSG00000167721.6:ENST00000301364.5:chr17:2238635:-	1139	-
chr17	2238106	2238107	ENSG00000167721.6:ENST00000301364.5:chr17:2238106:-	1140	-
chr17	2236929	2236930	ENSG00000167721.6:ENST00000301364.5:chr17:2236929:-	1147	-
chr17	16285614	16285615	ENSG00000170315.9:ENST00000302182.3:chr17:16285614:+	1,83	+
chr19	4422685	4422686	ENSG00000167670.11:ENST00000301280.5:chr19:4422685:+	1,34	+
chr19	4433456	4433457	ENSG00000167670.11:ENST00000301280.5:chr19:4433456:+	1,32	+
chr19	46388598	46388599	ENSG00000170604.3:ENST00000302165.3:chr19:46388598:-	1,6	-
chr19	52095929	52095930	ENSG00000167765.3:ENST00000301439.3:chr19:52095929:-	1,2	-
chr1	245027309	245027310	ENSG00000153187.12:ENST00000444376.2:chr1:245027309:-	1434	-
chr1	245027390	245027391	ENSG00000153187.12:ENST00000444376.2:chr1:245027390:-	1431	-
chr1	245027495	245027496	ENSG00000153187.12:ENST00000444376.2:chr1:245027495:-	1428	-
chr1	245027536	245027537	ENSG00000153187.12:ENST00000444376.2:chr1:245027536:-	1425	-
chr1	245019257	245019258	ENSG00000153187.12:ENST00000444376.2:chr1:245019257:-	1367	-
chr2	190717473	190717474	ENSG00000064933.12:ENST00000441310.2:chr2:190717473:+	1,29	+
chr3	140675465	140675466	ENSG00000114120.7:ENST00000446041.2:chr3:140675465:+	1,13	+
chr4	2831255	2831256	ENSG00000087266.11:ENST00000442312.2:chr4:2831255:+	1,4	+
chr8	98863627	98863628	ENSG00000104341.12:ENST00000445593.2:chr8:98863627:+	1,99	+
chr12	122709187	122709188	ENSG00000184047.11:ENST00000443649.3:chr12:122709187:-	1,4	-
chr15	63901429	63901430	ENSG00000103657.9:ENST00000443617.2:chr15:63901429:-	1,4	-
chr19	3532516	3532517	ENSG00000105325.9:ENST00000441788.2:chr19:3532516:+	1,29	+
chr19	12817167	12817168	ENSG00000105576.11:ENST00000441499.1:chr19:12817167:-	1,5	-
chr3	136082227	136082228	ENSG00000118007.8:ENST00000383202.2:chr3:136082227:-	1,28	-
chr4	37841471	37841472	ENSG00000169299.9:ENST00000381967.4:chr4:37841471:+	1,59	+
chr4	37848616	37848617	ENSG00000169299.9:ENST00000381967.4:chr4:37848616:+	1,59	+
chr4	119612722	119612723	ENSG00000145388.10:ENST00000388822.5:chr4:119612722:+	1,17	+
chr7	30634661	30634662	ENSG00000106105.9:ENST00000389266.3:chr7:30634661:+	1200	+
chr7	30640780	30640781	ENSG00000106105.9:ENST00000389266.3:chr7:30640780:+	1210	+
chr7	30671074	30671075	ENSG00000106105.9:ENST00000389266.3:chr7:30671074:+	1218	+
chr9	88648275	88648276	ENSG00000135052.12:ENST00000388712.3:chr9:88648275:-	1,59	-
chr9	104303098	104303099	ENSG00000155827.7:ENST00000389120.3:chr9:104303098:+	1,51	+
chr12	27450687	27450688	ENSG00000211455.3:ENST00000389032.3:chr12:27450687:+	1,29	+
chr13	24444279	24444280	ENSG00000027001.7:ENST00000382172.3:chr13:24444279:-	1,40	-
chr13	24433028	24433029	ENSG00000027001.7:ENST00000382172.3:chr13:24433028:-	1,40	-
chr15	43748263	43748264	ENSG00000067369.9:ENST00000382044.4:chr15:43748263:-	1,19	-
chr16	89837033	89837034	ENSG00000187741.10:ENST00000389301.3:chr16:89837033:-	1,15	-
chr16	89813292	89813293	ENSG00000187741.10:ENST00000389301.3:chr16:89813292:-	1,16	-
chr2	202625771	202625772	ENSG00000003393.10:ENST00000467448.1:chr2:202625771:-	1,11	-
chr3	133524745	133524746	ENSG00000144867.7:ENST00000466490.2:chr3:133524745:+	2,65	+
chr3	179096513	179096514	ENSG00000171109.14:ENST00000471841.1:chr3:179096513:+	1,22	+
chr15	69075345	69075346	ENSG00000140350.11:ENST00000465139.2:chr15:69075345:-	1135	-
chr16	53844060	53844061	ENSG00000140718.14:ENST00000471389.1:chr16:53844060:+	1,57	+
chr2	70457949	70457950	ENSG00000116001.11:ENST00000415783.2:chr2:70457949:-	1,13	-
chr2	86398464	86398465	ENSG00000132305.16:ENST00000410111.3:chr2:86398464:-	1,69	-
chr2	201680448	201680449	ENSG00000082153.13:ENST00000409600.1:chr2:201680448:+	1215	+
chr2	201681935	201681936	ENSG00000082153.13:ENST00000409600.1:chr2:201681935:+	1217	+
chr2	234749741	234749742	ENSG00000123485.7:ENST00000411486.2:chr2:234749741:-	1,49	-
chr3	184041368	184041369	ENSG00000114867.15:ENST00000414031.1:chr3:184041368:+	1,6	+
chr4	1988097	1988098	ENSG00000185049.8:ENST00000411638.2:chr4:1988097:-	1,17	-
chr4	6969104	6969105	ENSG00000132405.14:ENST00000409757.4:chr4:6969104:+	1,10	+
chr7	150771334	150771335	ENSG00000164889.8:ENST00000413384.2:chr7:150771334:+	1,13	+
chr8	22459487	22459488	ENSG00000241852.5:ENST00000409586.3:chr8:22459487:+	2,3	+
chr14	57713462	57713463	ENSG00000070367.11:ENST00000413566.2:chr14:57713462:-	1,67	-
chr19	7605580	7605581	ENSG00000032444.11:ENST00000414982.3:chr19:7605580:+	1,1	+
chr19	50411676	50411677	ENSG00000213024.6:ENST00000413454.1:chr19:50411676:-	1,12	-
chr22	38271957	38271958	ENSG00000100129.13:ENST00000412331.2:chr22:38271957:+	1,98	+
chr1	29069581	29069582	ENSG00000198492.10:ENST00000373812.3:chr1:29069581:+	1196	+
chr1	29069935	29069936	ENSG00000198492.10:ENST00000373812.3:chr1:29069935:+	1196	+
chr1	32636374	32636375	ENSG00000025800.9:ENST00000373625.3:chr1:32636374:+	1,58	+
chr1	32636418	32636419	ENSG00000025800.9:ENST00000373625.3:chr1:32636418:+	1,58	+
chr1	47144273	47144274	ENSG00000159658.6:ENST00000371933.3:chr1:47144273:-	1,7	-
chr1	67890903	67890904	ENSG00000142864.10:ENST00000370990.5:chr1:67890903:-	1,12	-
chr1	75229778	75229779	ENSG00000162623.11:ENST00000370867.3:chr1:75229778:+	1,33	+
chr1	86171791	86171792	ENSG00000117174.6:ENST00000370574.3:chr1:86171791:-	1,50	-
chr1	86142934	86142935	ENSG00000117174.6:ENST00000370574.3:chr1:86142934:-	1,50	-
chr6	44217150	44217151	ENSG00000096384.15:ENST00000371646.5:chr6:44217150:+	1812	+
chr6	44217241	44217242	ENSG00000096384.15:ENST00000371646.5:chr6:44217241:+	1812	+
chr6	44217425	44217426	ENSG00000096384.15:ENST00000371646.5:chr6:44217425:+	1812	+
chr6	44217452	44217453	ENSG00000096384.15:ENST00000371646.5:chr6:44217452:+	1812	+
chr6	44217548	44217549	ENSG00000096384.15:ENST00000371646.5:chr6:44217548:+	1812	+
chr6	44217788	44217789	ENSG00000096384.15:ENST00000371646.5:chr6:44217788:+	1812	+
chr6	44217859	44217860	ENSG00000096384.15:ENST00000371646.5:chr6:44217859:+	1811	+
chr6	44218853	44218854	ENSG00000096384.15:ENST00000371646.5:chr6:44218853:+	1808	+
chr6	44219190	44219191	ENSG00000096384.15:ENST00000371646.5:chr6:44219190:+	1805	+
chr6	44219329	44219330	ENSG00000096384.15:ENST00000371646.5:chr6:44219329:+	1805	+
chr6	44219814	44219815	ENSG00000096384.15:ENST00000371646.5:chr6:44219814:+	1805	+
chr6	44219903	44219904	ENSG00000096384.15:ENST00000371646.5:chr6:44219903:+	1805	+
chr6	44220806	44220807	ENSG00000096384.15:ENST00000371646.5:chr6:44220806:+	1805	+
chr6	44220880	44220881	ENSG00000096384.15:ENST00000371646.5:chr6:44220880:+	1805	+
chr6	44221055	44221056	ENSG00000096384.15:ENST00000371646.5:chr6:44221055:+	1797	+
chr6	44221083	44221084	ENSG00000096384.15:ENST00000371646.5:chr6:44221083:+	1805	+
chr6	44221089	44221090	ENSG00000096384.15:ENST00000371646.5:chr6:44221089:+	1805	+
chr6	56481840	56481841	ENSG00000151914.13:ENST00000370765.6:chr6:56481840:-	1,1	-
chr10	96099569	96099570	ENSG00000173145.7:ENST00000371361.3:chr10:96099569:-	1,46	-
chr20	45318005	45318006	ENSG00000172315.5:ENST00000372114.3:chr20:45318005:-	1,17	-
chrX	77369270	77369271	ENSG00000102144.9:ENST00000373316.4:chrX:77369270:+	1561	+
chrX	77369318	77369319	ENSG00000102144.9:ENST00000373316.4:chrX:77369318:+	2560	+
chrX	77378342	77378343	ENSG00000102144.9:ENST00000373316.4:chrX:77378342:+	1564	+
chrX	77378698	77378699	ENSG00000102144.9:ENST00000373316.4:chrX:77378698:+	2564	+
chrX	106959972	106959973	ENSG00000157514.12:ENST00000372397.2:chrX:106959972:-	1167	-
chrX	107381087	107381088	ENSG00000101844.13:ENST00000372232.3:chrX:107381087:+	1,14	+
chrX	119582907	119582908	ENSG00000005893.11:ENST00000371335.4:chrX:119582907:-	1,66	-
chrX	119680451	119680452	ENSG00000158290.12:ENST00000371322.5:chrX:119680451:-	1,20	-
chrX	133547558	133547559	ENSG00000156531.12:ENST00000370803.3:chrX:133547558:+	1109	+
chrX	133547911	133547912	ENSG00000156531.12:ENST00000370803.3:chrX:133547911:+	1110	+
chrX	133551219	133551220	ENSG00000156531.12:ENST00000370803.3:chrX:133551219:+	1110	+
chr2	71357824	71357825	ENSG00000124383.4:ENST00000244230.2:chr2:71357824:+	1,66	+
chr2	71361905	71361906	ENSG00000124383.4:ENST00000244230.2:chr2:71361905:+	1,66	+
chr2	152316523	152316524	ENSG00000080345.13:ENST00000243326.5:chr2:152316523:+	1,25	+
chr2	152319974	152319975	ENSG00000080345.13:ENST00000243326.5:chr2:152319974:+	1,11	+
chr3	100451444	100451445	ENSG00000114354.8:ENST00000240851.4:chr3:100451444:+	2,71	+
chr3	113440685	113440686	ENSG00000121579.8:ENST00000240922.3:chr3:113440685:-	1282	-
chr6	7301767	7301768	ENSG00000124783.8:ENST00000244763.4:chr6:7301767:-	1104	-
chr6	7295645	7295646	ENSG00000124783.8:ENST00000244763.4:chr6:7295645:-	1104	-
chr6	21595113	21595114	ENSG00000124766.4:ENST00000244745.1:chr6:21595113:+	2,7	+
chr6	36651940	36651941	ENSG00000124762.9:ENST00000244741.5:chr6:36651940:+	1,24	+
chr8	28384689	28384690	ENSG00000104290.6:ENST00000240093.3:chr8:28384689:+	1,7	+
chr8	110334618	110334619	ENSG00000120526.6:ENST00000239690.4:chr8:110334618:-	1,58	-
chr11	34482803	34482804	ENSG00000121691.4:ENST00000241052.4:chr11:34482803:+	1,35	+
chr13	37526699	37526700	ENSG00000120697.4:ENST00000239891.3:chr13:37526699:-	1,11	-
chr17	55027736	55027737	ENSG00000121058.4:ENST00000240316.4:chr17:55027736:-	1,29	-
chr17	55027864	55027865	ENSG00000121058.4:ENST00000240316.4:chr17:55027864:-	1,29	-
chr19	14520411	14520412	ENSG00000123136.10:ENST00000242776.4:chr19:14520411:-	1,24	-
chr19	34003507	34003508	ENSG00000124299.9:ENST00000244137.7:chr19:34003507:-	1,48	-
chr19	34003517	34003518	ENSG00000124299.9:ENST00000244137.7:chr19:34003517:-	1,48	-
chr19	33902632	33902633	ENSG00000124299.9:ENST00000244137.7:chr19:33902632:-	1,49	-
chr19	33878276	33878277	ENSG00000124299.9:ENST00000244137.7:chr19:33878276:-	1,49	-
chr19	46320070	46320071	ENSG00000125755.14:ENST00000245934.7:chr19:46320070:-	1,17	-
chr20	7963170	7963171	ENSG00000125827.4:ENST00000246024.2:chr20:7963170:-	1,29	-
chr20	48552992	48552993	ENSG00000124226.7:ENST00000244061.2:chr20:48552992:+	1,52	+
chr20	48553016	48553017	ENSG00000124226.7:ENST00000244061.2:chr20:48553016:+	1,52	+
chr1	28148807	28148808	ENSG00000117758.9:ENST00000373943.4:chr1:28148807:+	1,55	+
chr1	28856424	28856425	ENSG00000180198.11:ENST00000373832.1:chr1:28856424:+	3144	+
chr1	29508201	29508202	ENSG00000116350.11:ENST00000373795.4:chr1:29508201:-	1153	-
chr1	29481234	29481235	ENSG00000116350.11:ENST00000373795.4:chr1:29481234:-	1156	-
chr1	29476697	29476698	ENSG00000116350.11:ENST00000373795.4:chr1:29476697:-	1156	-
chr1	29475200	29475201	ENSG00000116350.11:ENST00000373795.4:chr1:29475200:-	1154	-
chr1	32660752	32660753	ENSG00000084652.11:ENST00000373610.3:chr1:32660752:+	1,31	+
chr1	32782335	32782336	ENSG00000116478.7:ENST00000373548.3:chr1:32782335:+	1218	+
chr1	32782339	32782340	ENSG00000116478.7:ENST00000373548.3:chr1:32782339:+	1218	+
chr1	32792630	32792631	ENSG00000116478.7:ENST00000373548.3:chr1:32792630:+	1220	+
chr1	32793184	32793185	ENSG00000116478.7:ENST00000373548.3:chr1:32793184:+	1221	+
chr1	32793202	32793203	ENSG00000116478.7:ENST00000373548.3:chr1:32793202:+	1221	+
chr1	32793232	32793233	ENSG00000116478.7:ENST00000373548.3:chr1:32793232:+	1221	+
chr1	32796240	32796241	ENSG00000116478.7:ENST00000373548.3:chr1:32796240:+	1221	+
chr1	32797354	32797355	ENSG00000116478.7:ENST00000373548.3:chr1:32797354:+	1221	+
chr1	32797691	32797692	ENSG00000116478.7:ENST00000373548.3:chr1:32797691:+	1221	+
chr1	32798640	32798641	ENSG00000116478.7:ENST00000373548.3:chr1:32798640:+	1219	+
chr1	33134401	33134402	ENSG00000162521.14:ENST00000373493.5:chr1:33134401:+	1171	+
chr1	33134938	33134939	ENSG00000162521.14:ENST00000373493.5:chr1:33134938:+	1175	+
chr1	33282836	33282837	ENSG00000134684.6:ENST00000373477.4:chr1:33282836:-	1173	-
chr1	33252616	33252617	ENSG00000134684.6:ENST00000373477.4:chr1:33252616:-	1179	-
chr1	33478920	33478921	ENSG00000004455.12:ENST00000373449.2:chr1:33478920:-	1147	-
chr6	36566629	36566630	ENSG00000112081.12:ENST00000373715.6:chr6:36566629:+	1168	+
chr6	36566744	36566745	ENSG00000112081.12:ENST00000373715.6:chr6:36566744:+	1169	+
chr9	116053823	116053824	ENSG00000136875.8:ENST00000374199.4:chr9:116053823:+	1,53	+
chr20	34240936	34240937	ENSG00000244462.3:ENST00000374114.3:chr20:34240936:-	1,45	-
chr20	34241275	34241276	ENSG00000244462.3:ENST00000374114.3:chr20:34241275:-	1,44	-
chr20	34241345	34241346	ENSG00000244462.3:ENST00000374114.3:chr20:34241345:-	1,43	-
chr20	34242654	34242655	ENSG00000244462.3:ENST00000374114.3:chr20:34242654:-	1,44	-
chrX	70757907	70757908	ENSG00000147162.9:ENST00000373719.3:chrX:70757907:+	1,48	+
chrX	70782856	70782857	ENSG00000147162.9:ENST00000373719.3:chrX:70782856:+	1,57	+
chrX	74288916	74288917	ENSG00000131269.11:ENST00000373394.3:chrX:74288916:-	1,8	-
chrX	74273393	74273394	ENSG00000131269.11:ENST00000373394.3:chrX:74273393:-	1,8	-
chr1	112002150	112002151	ENSG00000116459.6:ENST00000369722.3:chr1:112002150:+	1,44	+
chr1	113460123	113460124	ENSG00000155380.7:ENST00000369626.3:chr1:113460123:-	1573	-
chr1	113460126	113460127	ENSG00000155380.7:ENST00000369626.3:chr1:113460126:-	1572	-
chr1	113460541	113460542	ENSG00000155380.7:ENST00000369626.3:chr1:113460541:-	1573	-
chr1	115258776	115258777	ENSG00000213281.4:ENST00000369535.4:chr1:115258776:-	1100	-
chr1	117618363	117618364	ENSG00000116830.7:ENST00000369466.4:chr1:117618363:+	1,41	+
chr1	145611270	145611271	ENSG00000121848.9:ENST00000369291.5:chr1:145611270:+	1,4	+
chr1	145650504	145650505	ENSG00000121848.9:ENST00000369291.5:chr1:145650504:+	1,4	+
chr1	145684596	145684597	ENSG00000121848.9:ENST00000369291.5:chr1:145684596:+	1,4	+
chr1	147131095	147131096	ENSG00000162836.7:ENST00000369238.6:chr1:147131095:-	1,11	-
chr1	148310809	148310810	ENSG00000203832.6:ENST00000369202.1:chr1:148310809:-	1,3	-
chr1	148301275	148301276	ENSG00000203832.6:ENST00000369202.1:chr1:148301275:-	1,3	-
chr1	148271015	148271016	ENSG00000203832.6:ENST00000369202.1:chr1:148271015:-	1,1	-
chr1	148268723	148268724	ENSG00000203832.6:ENST00000369202.1:chr1:148268723:-	1,1	-
chr1	148266243	148266244	ENSG00000203832.6:ENST00000369202.1:chr1:148266243:-	1,1	-
chr1	148263951	148263952	ENSG00000203832.6:ENST00000369202.1:chr1:148263951:-	1,1	-
chr1	148263090	148263091	ENSG00000203832.6:ENST00000369202.1:chr1:148263090:-	2,2	-
chr1	148261483	148261484	ENSG00000203832.6:ENST00000369202.1:chr1:148261483:-	1,2	-
chr1	148259982	148259983	ENSG00000203832.6:ENST00000369202.1:chr1:148259982:-	1,3	-
chr1	148259147	148259148	ENSG00000203832.6:ENST00000369202.1:chr1:148259147:-	2,3	-
chr1	148256719	148256720	ENSG00000203832.6:ENST00000369202.1:chr1:148256719:-	1,4	-
chr1	148254383	148254384	ENSG00000203832.6:ENST00000369202.1:chr1:148254383:-	2,4	-
chr1	148251926	148251927	ENSG00000203832.6:ENST00000369202.1:chr1:148251926:-	3,3	-
chr1	148252108	148252109	ENSG00000203832.6:ENST00000369202.1:chr1:148252108:-	2,3	-
chr1	150116937	150116938	ENSG00000136631.8:ENST00000369130.3:chr1:150116937:+	1,27	+
chr1	150461561	150461562	ENSG00000143374.10:ENST00000369064.3:chr1:150461561:+	1,70	+
chr1	150471694	150471695	ENSG00000143374.10:ENST00000369064.3:chr1:150471694:+	1,70	+
chr1	150551325	150551326	ENSG00000143384.8:ENST00000369026.2:chr1:150551325:-	1,67	-
chr1	151140741	151140742	ENSG00000163156.7:ENST00000368905.4:chr1:151140741:+	1,3	+
chr6	88218804	88218805	ENSG00000164414.12:ENST00000369552.4:chr6:88218804:+	1,14	+
chr6	90428602	90428603	ENSG00000112159.7:ENST00000369393.3:chr6:90428602:-	1,3	-
chr6	90383000	90383001	ENSG00000112159.7:ENST00000369393.3:chr6:90383000:-	1,8	-
chr6	90360487	90360488	ENSG00000112159.7:ENST00000369393.3:chr6:90360487:-	1,8	-
chr6	93973629	93973630	ENSG00000135333.9:ENST00000369303.4:chr6:93973629:-	7,17	-
chr6	96969816	96969817	ENSG00000014123.9:ENST00000369278.4:chr6:96969816:+	1,6	+
chr6	105800874	105800875	ENSG00000085377.9:ENST00000369110.3:chr6:105800874:-	1,33	-
chr6	105730428	105730429	ENSG00000085377.9:ENST00000369110.3:chr6:105730428:-	1,33	-
chr6	107100409	107100410	ENSG00000130348.7:ENST00000369046.4:chr6:107100409:+	1,22	+
chr6	108230168	108230169	ENSG00000025796.9:ENST00000369002.4:chr6:108230168:-	1,56	-
chr6	108227696	108227697	ENSG00000025796.9:ENST00000369002.4:chr6:108227696:-	1,56	-
chr6	108214767	108214768	ENSG00000025796.9:ENST00000369002.4:chr6:108214767:-	1,34	-
chr10	112540576	112540577	ENSG00000203867.7:ENST00000369519.3:chr10:112540576:+	1,1	+
chr10	115485157	115485158	ENSG00000165806.15:ENST00000369318.3:chr10:115485157:+	1,19	+
chr10	120824978	120824979	ENSG00000107581.8:ENST00000369144.3:chr10:120824978:-	1217	-
chr10	120819189	120819190	ENSG00000107581.8:ENST00000369144.3:chr10:120819189:-	1218	-
chr10	120801540	120801541	ENSG00000107581.8:ENST00000369144.3:chr10:120801540:-	1110	-
chr10	121429372	121429373	ENSG00000151929.5:ENST00000369085.3:chr10:121429372:+	1,22	+
chrX	153995572	153995573	ENSG00000130826.11:ENST00000369550.5:chrX:153995572:+	1,81	+
chr15	75897491	75897492	ENSG00000169371.9:ENST00000564675.1:chr15:75897491:-	1,6	-
chr16	4559735	4559736	ENSG00000103415.7:ENST00000570646.1:chr16:4559735:+	1,7	+
chr16	30767803	30767804	ENSG00000156873.11:ENST00000563588.1:chr16:30767803:+	1,6	+
chr16	47165892	47165893	ENSG00000171208.5:ENST00000562435.1:chr16:47165892:-	1,18	-
chr16	56500077	56500078	ENSG00000087263.12:ENST00000566157.1:chr16:56500077:+	1,85	+
chr16	90025468	90025469	ENSG00000140995.12:ENST00000563594.1:chr16:90025468:+	1,3	+
chr1	220355688	220355689	ENSG00000118873.11:ENST00000358951.2:chr1:220355688:-	1,30	-
chr2	64322367	64322368	ENSG00000197329.7:ENST00000358912.4:chr2:64322367:-	1,16	-
chr2	201437922	201437923	ENSG00000163535.13:ENST00000357799.4:chr2:201437922:+	1,19	+
chr3	58107212	58107213	ENSG00000136068.10:ENST00000358537.3:chr3:58107212:+	1,3	+
chr4	149356798	149356799	ENSG00000151623.10:ENST00000358102.3:chr4:149356798:-	1,1	-
chr5	94872798	94872799	ENSG00000198677.6:ENST00000358746.2:chr5:94872798:-	1,47	-
chr5	94852998	94852999	ENSG00000198677.6:ENST00000358746.2:chr5:94852998:-	1,53	-
chr5	94826716	94826717	ENSG00000198677.6:ENST00000358746.2:chr5:94826716:-	1,52	-
chr8	12957220	12957221	ENSG00000164741.10:ENST00000358919.2:chr8:12957220:-	1,16	-
chr8	23299120	23299121	ENSG00000197217.8:ENST00000358689.4:chr8:23299120:-	1,4	-
chr12	133338233	133338234	ENSG00000176915.10:ENST00000357997.5:chr12:133338233:-	1,35	-
chr12	133331325	133331326	ENSG00000176915.10:ENST00000357997.5:chr12:133331325:-	1,35	-
chr12	133327369	133327370	ENSG00000176915.10:ENST00000357997.5:chr12:133327369:-	1,35	-
chr12	133306341	133306342	ENSG00000176915.10:ENST00000357997.5:chr12:133306341:-	1,34	-
chr14	73685850	73685851	ENSG00000080815.14:ENST00000357710.4:chr14:73685850:+	1,16	+
chr14	100820180	100820181	ENSG00000140105.13:ENST00000358655.4:chr14:100820180:-	1,14	-
chr16	67917622	67917623	ENSG00000038358.10:ENST00000358933.5:chr16:67917622:+	1,14	+
chr16	67917623	67917624	ENSG00000038358.10:ENST00000358933.5:chr16:67917623:+	1,14	+
chrX	77112242	77112243	ENSG00000102158.15:ENST00000358075.6:chrX:77112242:-	1,32	-
chr4	140222934	140222935	ENSG00000164134.8:ENST00000296543.5:chr4:140222934:+	1,52	+
chr4	140272403	140272404	ENSG00000164134.8:ENST00000296543.5:chr4:140272403:+	1,55	+
chr4	140283047	140283048	ENSG00000164134.8:ENST00000296543.5:chr4:140283047:+	1,59	+
chr4	146031352	146031353	ENSG00000164163.6:ENST00000296577.4:chr4:146031352:+	1138	+
chr4	148546126	148546127	ENSG00000164168.3:ENST00000296582.3:chr4:148546126:+	1,24	+
chr5	5463081	5463082	ENSG00000164151.7:ENST00000296564.7:chr5:5463081:+	1,13	+
chr5	5464521	5464522	ENSG00000164151.7:ENST00000296564.7:chr5:5464521:+	1,14	+
chr5	71482535	71482536	ENSG00000131711.10:ENST00000296755.7:chr5:71482535:+	1,37	+
chr5	71490126	71490127	ENSG00000131711.10:ENST00000296755.7:chr5:71490126:+	1,37	+
chr5	76736758	76736759	ENSG00000164253.8:ENST00000296679.4:chr5:76736758:-	1,43	-
chr5	132097229	132097230	ENSG00000164402.9:ENST00000296873.7:chr5:132097229:-	1,51	-
chr5	137910952	137910953	ENSG00000113013.8:ENST00000297185.3:chr5:137910952:-	1231	-
chr5	137910954	137910955	ENSG00000113013.8:ENST00000297185.3:chr5:137910954:-	1231	-
chr5	137909786	137909787	ENSG00000113013.8:ENST00000297185.3:chr5:137909786:-	1231	-
chr5	137903392	137903393	ENSG00000113013.8:ENST00000297185.3:chr5:137903392:-	1233	-
chr5	137902327	137902328	ENSG00000113013.8:ENST00000297185.3:chr5:137902327:-	1242	-
chr5	137893569	137893570	ENSG00000113013.8:ENST00000297185.3:chr5:137893569:-	1246	-
chr5	137893641	137893642	ENSG00000113013.8:ENST00000297185.3:chr5:137893641:-	1246	-
chr5	137891765	137891766	ENSG00000113013.8:ENST00000297185.3:chr5:137891765:-	1242	-
chr5	153795385	153795386	ENSG00000164574.11:ENST00000297107.6:chr5:153795385:+	1,1	+
chr5	158697003	158697004	ENSG00000164332.6:ENST00000296786.6:chr5:158697003:+	1,10	+
chr7	106851550	106851551	ENSG00000164597.9:ENST00000297135.3:chr7:106851550:-	1,37	-
chr8	94935321	94935322	ENSG00000164951.11:ENST00000297598.4:chr8:94935321:+	1,13	+
chr8	95538915	95538916	ENSG00000164944.7:ENST00000297591.5:chr8:95538915:-	1,20	-
chr8	95539042	95539043	ENSG00000164944.7:ENST00000297591.5:chr8:95539042:-	1,20	-
chr8	117878879	117878880	ENSG00000164754.8:ENST00000297338.2:chr8:117878879:-	1164	-
chr8	117868479	117868480	ENSG00000164754.8:ENST00000297338.2:chr8:117868479:-	1172	-
chr8	117861189	117861190	ENSG00000164754.8:ENST00000297338.2:chr8:117861189:-	1117	-
chr8	124267296	124267297	ENSG00000165156.10:ENST00000297857.2:chr8:124267296:-	1,8	-
chr9	140481473	140481474	ENSG00000165724.5:ENST00000298585.2:chr9:140481473:-	1,3	-
chr10	120933984	120933985	ENSG00000165672.5:ENST00000298510.2:chr10:120933984:-	1202	-
chr10	120933335	120933336	ENSG00000165672.5:ENST00000298510.2:chr10:120933335:-	1202	-
chr10	120933366	120933367	ENSG00000165672.5:ENST00000298510.2:chr10:120933366:-	1202	-
chr10	126523374	126523375	ENSG00000165660.7:ENST00000298492.5:chr10:126523374:+	1,27	+
chr11	74109128	74109129	ENSG00000165434.6:ENST00000298198.4:chr11:74109128:-	1,5	-
chr14	35182641	35182642	ENSG00000165410.10:ENST00000298159.6:chr14:35182641:-	1,36	-
chr14	51467481	51467482	ENSG00000100505.9:ENST00000298355.3:chr14:51467481:-	1,10	-
chrX	70147159	70147160	ENSG00000165349.7:ENST00000298085.4:chrX:70147159:-	1,2	-
chr10	3823994	3823995	ENSG00000067082.10:ENST00000497571.1:chr10:3823994:-	1,12	-
chr10	3823999	3824000	ENSG00000067082.10:ENST00000497571.1:chr10:3823999:-	1,12	-
chr17	47007907	47007908	ENSG00000159210.5:ENST00000502492.1:chr17:47007907:-	1,5	-
chr17	48187449	48187450	ENSG00000005882.7:ENST00000503176.1:chr17:48187449:+	1,14	+
chr17	48941203	48941204	ENSG00000141232.4:ENST00000499247.2:chr17:48941203:-	1,9	-
chr21	45212589	45212590	ENSG00000160214.8:ENST00000497547.1:chr21:45212589:+	1,22	+
chr1	11141164	11141165	ENSG00000171824.9:ENST00000544779.1:chr1:11141164:-	1,5	-
chr6	83074914	83074915	ENSG00000146242.5:ENST00000543496.1:chr6:83074914:+	1,4	+
chr12	6672495	6672496	ENSG00000111641.6:ENST00000541778.1:chr12:6672495:-	1,27	-
chr12	6691433	6691434	ENSG00000111642.10:ENST00000544040.1:chr12:6691433:-	1,14	-
chr12	54675717	54675718	ENSG00000135486.13:ENST00000546500.1:chr12:54675717:+	1192	+
chr12	54676034	54676035	ENSG00000135486.13:ENST00000546500.1:chr12:54676034:+	1193	+
chr12	54678078	54678079	ENSG00000135486.13:ENST00000546500.1:chr12:54678078:+	1193	+
chr14	45644763	45644764	ENSG00000187790.6:ENST00000542564.2:chr14:45644763:+	1,1	+
chr14	105677540	105677541	ENSG00000185024.11:ENST00000546474.1:chr14:105677540:-	1,2	-
chr16	57264671	57264672	ENSG00000159579.9:ENST00000537866.1:chr16:57264671:+	1,9	+
chr19	47291178	47291179	ENSG00000105281.8:ENST00000542575.2:chr19:47291178:-	1157	-
chr1	6294947	6294948	ENSG00000116237.11:ENST00000343813.5:chr1:6294947:-	1,36	-
chr1	6294955	6294956	ENSG00000116237.11:ENST00000343813.5:chr1:6294955:-	1,36	-
chr1	32375693	32375694	ENSG00000184007.13:ENST00000344035.6:chr1:32375693:-	1,38	-
chr1	46768849	46768850	ENSG00000132128.12:ENST00000343304.6:chr1:46768849:-	1,21	-
chr1	46752135	46752136	ENSG00000132128.12:ENST00000343304.6:chr1:46752135:-	1,22	-
chr1	46747043	46747044	ENSG00000132128.12:ENST00000343304.6:chr1:46747043:-	1,23	-
chr1	145348129	145348130	ENSG00000163386.16:ENST00000342960.5:chr1:145348129:+	1,4	+
chr1	223984177	223984178	ENSG00000143514.12:ENST00000343537.7:chr1:223984177:-	1,30	-
chr1	223981076	223981077	ENSG00000143514.12:ENST00000343537.7:chr1:223981076:-	1,29	-
chr3	43122638	43122639	ENSG00000144647.5:ENST00000344697.2:chr3:43122638:-	1,39	-
chr3	122182846	122182847	ENSG00000114030.8:ENST00000344337.6:chr3:122182846:-	1,75	-
chr3	122152531	122152532	ENSG00000114030.8:ENST00000344337.6:chr3:122152531:-	1,79	-
chr4	57357606	57357607	ENSG00000174780.11:ENST00000342756.5:chr4:57357606:+	1,77	+
chr10	8006930	8006931	ENSG00000165632.7:ENST00000344293.5:chr10:8006930:+	1,36	+
chr11	47312271	47312272	ENSG00000110514.14:ENST00000342922.4:chr11:47312271:+	1,1	+
chr12	49953291	49953292	ENSG00000187778.9:ENST00000343810.4:chr12:49953291:-	1,20	-
chr13	31903643	31903644	ENSG00000187676.7:ENST00000343307.4:chr13:31903643:+	1,22	+
chr15	63631136	63631137	ENSG00000074410.9:ENST00000344366.3:chr15:63631136:-	1,5	-
chr16	2012171	2012172	ENSG00000140988.11:ENST00000343262.4:chr16:2012171:-	1,96	-
chr16	84135247	84135248	ENSG00000140943.12:ENST00000343411.3:chr16:84135247:-	1,45	-
chr16	84094325	84094326	ENSG00000140943.12:ENST00000343411.3:chr16:84094325:-	1,50	-
chr20	32264762	32264763	ENSG00000101412.9:ENST00000343380.5:chr20:32264762:-	1,7	-
chr2	190718730	190718731	ENSG00000064933.12:ENST00000447232.2:chr2:190718730:+	1,1	+
chr3	47891436	47891437	ENSG00000132153.10:ENST00000445061.1:chr3:47891436:+	1,17	+
chr5	134118689	134118690	ENSG00000145833.11:ENST00000452510.2:chr5:134118689:+	1,30	+
chr11	9746365	9746366	ENSG00000133789.10:ENST00000447399.2:chr11:9746365:+	1,4	+
chr11	19197413	19197414	ENSG00000177054.9:ENST00000446113.2:chr11:19197413:+	1,24	+
chr12	21630891	21630892	ENSG00000004700.11:ENST00000444129.2:chr12:21630891:-	1,27	-
chr12	80222185	80222186	ENSG00000058272.11:ENST00000450142.2:chr12:80222185:-	1,38	-
chr12	85285832	85285833	ENSG00000072041.12:ENST00000450363.3:chr12:85285832:-	1,36	-
chr16	23555992	23555993	ENSG00000103356.11:ENST00000449606.1:chr16:23555992:-	1,29	-
chrX	153735596	153735597	ENSG00000071889.12:ENST00000447601.2:chrX:153735596:-	1,3	-
chr1	43395579	43395580	ENSG00000117394.15:ENST00000426263.3:chr1:43395579:-	1,48	-
chr2	207008775	207008776	ENSG00000023228.9:ENST00000423725.1:chr2:207008775:-	1,18	-
chr8	22426780	22426781	ENSG00000120896.9:ENST00000428103.1:chr8:22426780:+	1,1	+
chr11	107381652	107381653	ENSG00000137760.10:ENST00000428149.2:chr11:107381652:-	2,5	-
chr11	125770109	125770110	ENSG00000198331.6:ENST00000425380.2:chr11:125770109:+	1,6	+
chr17	38569489	38569490	ENSG00000131747.10:ENST00000423485.1:chr17:38569489:-	1293	-
chr17	38569175	38569176	ENSG00000131747.10:ENST00000423485.1:chr17:38569175:-	1289	-
chr17	38568057	38568058	ENSG00000131747.10:ENST00000423485.1:chr17:38568057:-	1296	-
chr17	38564312	38564313	ENSG00000131747.10:ENST00000423485.1:chr17:38564312:-	1305	-
chr17	38564324	38564325	ENSG00000131747.10:ENST00000423485.1:chr17:38564324:-	1305	-
chr17	38561132	38561133	ENSG00000131747.10:ENST00000423485.1:chr17:38561132:-	1308	-
chr17	38560419	38560420	ENSG00000131747.10:ENST00000423485.1:chr17:38560419:-	1310	-
chr17	38559272	38559273	ENSG00000131747.10:ENST00000423485.1:chr17:38559272:-	1310	-
chr17	38556531	38556532	ENSG00000131747.10:ENST00000423485.1:chr17:38556531:-	1307	-
chr17	38555105	38555106	ENSG00000131747.10:ENST00000423485.1:chr17:38555105:-	1297	-
chr17	38552611	38552612	ENSG00000131747.10:ENST00000423485.1:chr17:38552611:-	1255	-
chr17	38546293	38546294	ENSG00000131747.10:ENST00000423485.1:chr17:38546293:-	1,25	-
chr17	40134009	40134010	ENSG00000168259.10:ENST00000426588.3:chr17:40134009:-	1,3	-
chr1	40535482	40535483	ENSG00000131236.12:ENST00000340450.3:chr1:40535482:+	1,15	+
chr1	62916105	62916106	ENSG00000162607.8:ENST00000339950.4:chr1:62916105:+	1,86	+
chr1	115282452	115282453	ENSG00000009307.11:ENST00000339438.6:chr1:115282452:-	1750	-
chr1	115282463	115282464	ENSG00000009307.11:ENST00000339438.6:chr1:115282463:-	1750	-
chr1	115280607	115280608	ENSG00000009307.11:ENST00000339438.6:chr1:115280607:-	1750	-
chr1	115277069	115277070	ENSG00000009307.11:ENST00000339438.6:chr1:115277069:-	1750	-
chr1	115276654	115276655	ENSG00000009307.11:ENST00000339438.6:chr1:115276654:-	1749	-
chr1	115276663	115276664	ENSG00000009307.11:ENST00000339438.6:chr1:115276663:-	1750	-
chr1	115275363	115275364	ENSG00000009307.11:ENST00000339438.6:chr1:115275363:-	1750	-
chr1	115273130	115273131	ENSG00000009307.11:ENST00000339438.6:chr1:115273130:-	1750	-
chr1	115273200	115273201	ENSG00000009307.11:ENST00000339438.6:chr1:115273200:-	1750	-
chr1	115272997	115272998	ENSG00000009307.11:ENST00000339438.6:chr1:115272997:-	1750	-
chr1	115269706	115269707	ENSG00000009307.11:ENST00000339438.6:chr1:115269706:-	1750	-
chr1	115268839	115268840	ENSG00000009307.11:ENST00000339438.6:chr1:115268839:-	1750	-
chr1	115268976	115268977	ENSG00000009307.11:ENST00000339438.6:chr1:115268976:-	1750	-
chr1	115266542	115266543	ENSG00000009307.11:ENST00000339438.6:chr1:115266542:-	1748	-
chr1	115266569	115266570	ENSG00000009307.11:ENST00000339438.6:chr1:115266569:-	1748	-
chr1	115262248	115262249	ENSG00000009307.11:ENST00000339438.6:chr1:115262248:-	1748	-
chr1	115262321	115262322	ENSG00000009307.11:ENST00000339438.6:chr1:115262321:-	1748	-
chr2	192160879	192160880	ENSG00000128641.13:ENST00000339514.4:chr2:192160879:+	1,11	+
chr2	192248022	192248023	ENSG00000128641.13:ENST00000339514.4:chr2:192248022:+	1,11	+
chr4	24578012	24578013	ENSG00000109606.8:ENST00000336812.4:chr4:24578012:-	1162	-
chr4	24578018	24578019	ENSG00000109606.8:ENST00000336812.4:chr4:24578018:-	1162	-
chr4	24578095	24578096	ENSG00000109606.8:ENST00000336812.4:chr4:24578095:-	1161	-
chr4	24578100	24578101	ENSG00000109606.8:ENST00000336812.4:chr4:24578100:-	1161	-
chr4	24578282	24578283	ENSG00000109606.8:ENST00000336812.4:chr4:24578282:-	1158	-
chr4	24550508	24550509	ENSG00000109606.8:ENST00000336812.4:chr4:24550508:-	1167	-
chr4	24534549	24534550	ENSG00000109606.8:ENST00000336812.4:chr4:24534549:-	1169	-
chr4	24534612	24534613	ENSG00000109606.8:ENST00000336812.4:chr4:24534612:-	1169	-
chr4	24529575	24529576	ENSG00000109606.8:ENST00000336812.4:chr4:24529575:-	1169	-
chr5	82649045	82649046	ENSG00000152422.11:ENST00000338635.6:chr5:82649045:+	1,4	+
chr6	170110464	170110465	ENSG00000130024.10:ENST00000339209.4:chr6:170110464:-	1,2	-
chr8	72246354	72246355	ENSG00000104313.13:ENST00000340726.3:chr8:72246354:-	1,5	-
chr13	113839836	113839837	ENSG00000126226.17:ENST00000337344.4:chr13:113839836:-	1,11	-
chr17	17062208	17062209	ENSG00000133030.15:ENST00000341712.4:chr17:17062208:+	1,1	+
chr1	67890841	67890842	ENSG00000142864.10:ENST00000370994.4:chr1:67890841:-	1319	-
chr1	67890883	67890884	ENSG00000142864.10:ENST00000370994.4:chr1:67890883:-	1317	-
chr1	67885786	67885787	ENSG00000142864.10:ENST00000370994.4:chr1:67885786:-	1327	-
chr1	154145649	154145650	ENSG00000143549.15:ENST00000368533.3:chr1:154145649:-	1223	-
chr1	154938252	154938253	ENSG00000160691.14:ENST00000368450.1:chr1:154938252:-	1,3	-
chr1	155233772	155233773	ENSG00000176444.14:ENST00000368361.4:chr1:155233772:-	1,19	-
chr1	171753166	171753167	ENSG00000010165.15:ENST00000361735.3:chr1:171753166:+	1,69	+
chr1	171753355	171753356	ENSG00000010165.15:ENST00000361735.3:chr1:171753355:+	1,69	+
chr1	171761227	171761228	ENSG00000010165.15:ENST00000361735.3:chr1:171761227:+	1,69	+
chr1	200377744	200377745	ENSG00000162702.7:ENST00000367353.1:chr1:200377744:-	1,13	-
chr1	200378792	200378793	ENSG00000162702.7:ENST00000367353.1:chr1:200378792:-	1,11	-
chr7	158473504	158473505	ENSG00000146918.15:ENST00000356309.3:chr7:158473504:-	1,46	-
chr7	158457250	158457251	ENSG00000146918.15:ENST00000356309.3:chr7:158457250:-	1,46	-
chr17	49197950	49197951	ENSG00000008294.16:ENST00000357122.4:chr17:49197950:-	1,13	-
chr20	54961423	54961424	ENSG00000087586.13:ENST00000371356.2:chr20:54961423:-	1,1	-
chr22	22314091	22314092	ENSG00000100038.15:ENST00000357179.5:chr22:22314091:-	1,8	-
chr22	42032707	42032708	ENSG00000196419.8:ENST00000360079.3:chr22:42032707:+	1464	+
chr22	42033612	42033613	ENSG00000196419.8:ENST00000360079.3:chr22:42033612:+	1464	+
chr22	42043031	42043032	ENSG00000196419.8:ENST00000360079.3:chr22:42043031:+	1464	+
chr22	42052928	42052929	ENSG00000196419.8:ENST00000360079.3:chr22:42052928:+	1464	+
chr22	42052955	42052956	ENSG00000196419.8:ENST00000360079.3:chr22:42052955:+	2463	+
chr22	42054315	42054316	ENSG00000196419.8:ENST00000360079.3:chr22:42054315:+	1463	+
chr22	42057336	42057337	ENSG00000196419.8:ENST00000360079.3:chr22:42057336:+	1462	+
chr1	212532064	212532065	ENSG00000066027.7:ENST00000261461.2:chr1:212532064:+	9,13	+
chr1	229622256	229622257	ENSG00000069248.9:ENST00000261396.3:chr1:229622256:-	1161	-
chr1	229619817	229619818	ENSG00000069248.9:ENST00000261396.3:chr1:229619817:-	1162	-
chr1	229613370	229613371	ENSG00000069248.9:ENST00000261396.3:chr1:229613370:-	1163	-
chr1	229601186	229601187	ENSG00000069248.9:ENST00000261396.3:chr1:229601186:-	1157	-
chr1	229600539	229600540	ENSG00000069248.9:ENST00000261396.3:chr1:229600539:-	1157	-
chr1	229600550	229600551	ENSG00000069248.9:ENST00000261396.3:chr1:229600550:-	1157	-
chr1	229577658	229577659	ENSG00000069248.9:ENST00000261396.3:chr1:229577658:-	1138	-
chr1	229577762	229577763	ENSG00000069248.9:ENST00000261396.3:chr1:229577762:-	1137	-
chr4	39779340	39779341	ENSG00000078140.9:ENST00000261427.5:chr4:39779340:+	1,50	+
chr5	64875300	64875301	ENSG00000113593.7:ENST00000261308.5:chr5:64875300:+	1,61	+
chr5	126113290	126113291	ENSG00000113368.7:ENST00000261366.5:chr5:126113290:+	1,87	+
chr5	126140552	126140553	ENSG00000113368.7:ENST00000261366.5:chr5:126140552:+	1,88	+
chr5	175933921	175933922	ENSG00000113194.8:ENST00000261942.6:chr5:175933921:+	1,29	+
chr12	4385272	4385273	ENSG00000118971.3:ENST00000261254.3:chr12:4385272:+	1,39	+
chr12	109072075	109072076	ENSG00000110880.6:ENST00000261401.3:chr12:109072075:-	1,71	-
chr12	109051090	109051091	ENSG00000110880.6:ENST00000261401.3:chr12:109051090:-	1,73	-
chr12	112220987	112220988	ENSG00000111275.8:ENST00000261733.2:chr12:112220987:+	1,34	+
chr13	50299634	50299635	ENSG00000102753.5:ENST00000261667.3:chr13:50299634:-	1,53	-
chr13	113208456	113208457	ENSG00000126216.8:ENST00000261965.3:chr13:113208456:-	1,24	-
chr14	78201317	78201318	ENSG00000100603.9:ENST00000261531.7:chr14:78201317:-	1,70	-
chr14	90729666	90729667	ENSG00000100764.9:ENST00000261303.8:chr14:90729666:+	1,63	+
chr15	52425609	52425610	ENSG00000069966.14:ENST00000261837.7:chr15:52425609:-	1,3	-
chr15	64701823	64701824	ENSG00000103671.5:ENST00000261884.3:chr15:64701823:+	1,20	+
chr15	65868681	65868682	ENSG00000074696.8:ENST00000261875.5:chr15:65868681:+	1139	+
chr15	66170138	66170139	ENSG00000103769.5:ENST00000261890.2:chr15:66170138:+	1,31	+
chr16	70310934	70310935	ENSG00000090861.11:ENST00000261772.8:chr16:70310934:-	1,55	-
chr16	70310512	70310513	ENSG00000090861.11:ENST00000261772.8:chr16:70310512:-	1,55	-
chr16	70304130	70304131	ENSG00000090861.11:ENST00000261772.8:chr16:70304130:-	1,56	-
chr16	87902569	87902570	ENSG00000103257.4:ENST00000261622.4:chr16:87902569:-	1,38	-
chr17	20922459	20922460	ENSG00000124422.7:ENST00000261497.4:chr17:20922459:-	1,98	-
chr17	20919206	20919207	ENSG00000124422.7:ENST00000261497.4:chr17:20919206:-	1,98	-
chr17	20910224	20910225	ENSG00000124422.7:ENST00000261497.4:chr17:20910224:-	1,98	-
chr17	28616461	28616462	ENSG00000108578.10:ENST00000261714.6:chr17:28616461:-	1,43	-
chr17	28601149	28601150	ENSG00000108578.10:ENST00000261714.6:chr17:28601149:-	1,48	-
chr18	215499	215500	ENSG00000079134.7:ENST00000261600.6:chr18:215499:-	1,34	-
chr18	2578069	2578070	ENSG00000080986.8:ENST00000261597.4:chr18:2578069:+	1,33	+
chr18	19395681	19395682	ENSG00000101752.7:ENST00000261537.6:chr18:19395681:+	1,5	+
chr18	29111010	29111011	ENSG00000046604.8:ENST00000261590.8:chr18:29111010:+	1,56	+
chr18	29691874	29691875	ENSG00000134758.9:ENST00000261593.3:chr18:29691874:+	1,76	+
chr1	78430617	78430618	ENSG00000162613.12:ENST00000370768.2:chr1:78430617:-	1,67	-
chr1	115282371	115282372	ENSG00000009307.11:ENST00000358528.4:chr1:115282371:-	1,79	-
chr1	115273194	115273195	ENSG00000009307.11:ENST00000358528.4:chr1:115273194:-	1,79	-
chr1	115262284	115262285	ENSG00000009307.11:ENST00000358528.4:chr1:115262284:-	1,79	-
chr1	155697441	155697442	ENSG00000132676.11:ENST00000343043.3:chr1:155697441:+	1,9	+
chr3	101298744	101298745	ENSG00000081154.7:ENST00000265260.3:chr3:101298744:+	1119	+
chr4	83350550	83350551	ENSG00000152795.13:ENST00000295470.5:chr4:83350550:-	1,84	-
chr6	31608254	31608255	ENSG00000204463.8:ENST00000362049.6:chr6:31608254:-	1,25	-
chr7	26237313	26237314	ENSG00000122566.16:ENST00000356674.7:chr7:26237313:-	1510	-
chr7	26237325	26237326	ENSG00000122566.16:ENST00000356674.7:chr7:26237325:-	1511	-
chr7	26236475	26236476	ENSG00000122566.16:ENST00000356674.7:chr7:26236475:-	1512	-
chr7	26236036	26236037	ENSG00000122566.16:ENST00000356674.7:chr7:26236036:-	1512	-
chr7	26232185	26232186	ENSG00000122566.16:ENST00000356674.7:chr7:26232185:-	1512	-
chr8	62566128	62566129	ENSG00000198363.11:ENST00000356457.5:chr8:62566128:-	1,33	-
chr10	70509017	70509018	ENSG00000060339.9:ENST00000265872.6:chr10:70509017:+	1159	+
chr10	70531143	70531144	ENSG00000060339.9:ENST00000265872.6:chr10:70531143:+	1,38	+
chr11	64573228	64573229	ENSG00000133895.10:ENST00000315422.4:chr11:64573228:-	1,14	-
chr12	48535540	48535541	ENSG00000152556.11:ENST00000359794.5:chr12:48535540:+	1,25	+
chr13	98652889	98652890	ENSG00000065150.14:ENST00000261574.5:chr13:98652889:+	1,58	+
chr13	98655189	98655190	ENSG00000065150.14:ENST00000261574.5:chr13:98655189:+	1,61	+
chr13	98662418	98662419	ENSG00000065150.14:ENST00000261574.5:chr13:98662418:+	1,66	+
chr13	98671995	98671996	ENSG00000065150.14:ENST00000261574.5:chr13:98671995:+	1,67	+
chr15	72511405	72511406	ENSG00000067225.13:ENST00000335181.5:chr15:72511405:-	1762	-
chr15	72502811	72502812	ENSG00000067225.13:ENST00000335181.5:chr15:72502811:-	1766	-
chr15	72501146	72501147	ENSG00000067225.13:ENST00000335181.5:chr15:72501146:-	1774	-
chr15	72499140	72499141	ENSG00000067225.13:ENST00000335181.5:chr15:72499140:-	1775	-
chr15	72494814	72494815	ENSG00000067225.13:ENST00000335181.5:chr15:72494814:-	1776	-
chr15	72494844	72494845	ENSG00000067225.13:ENST00000335181.5:chr15:72494844:-	1776	-
chr15	72492839	72492840	ENSG00000067225.13:ENST00000335181.5:chr15:72492839:-	1776	-
chr15	72492896	72492897	ENSG00000067225.13:ENST00000335181.5:chr15:72492896:-	1776	-
chr15	72492899	72492900	ENSG00000067225.13:ENST00000335181.5:chr15:72492899:-	1776	-
chr16	66844305	66844306	ENSG00000159593.10:ENST00000290810.3:chr16:66844305:-	1,75	-
chr17	40065833	40065834	ENSG00000131473.12:ENST00000352035.2:chr17:40065833:-	1,40	-
chr17	40489544	40489545	ENSG00000168610.10:ENST00000264657.5:chr17:40489544:-	1,28	-
chr17	79479269	79479270	ENSG00000184009.5:ENST00000331925.2:chr17:79479269:-	1157	-
chr17	79479315	79479316	ENSG00000184009.5:ENST00000331925.2:chr17:79479315:-	1157	-
chr17	79478968	79478969	ENSG00000184009.5:ENST00000331925.2:chr17:79478968:-	1158	-
chr17	79477783	79477784	ENSG00000184009.5:ENST00000331925.2:chr17:79477783:-	1164	-
chr17	79477790	79477791	ENSG00000184009.5:ENST00000331925.2:chr17:79477790:-	1164	-
chr18	52921756	52921757	ENSG00000196628.9:ENST00000354452.3:chr18:52921756:-	1,3	-
chr20	57480528	57480529	ENSG00000087460.19:ENST00000371095.3:chr20:57480528:+	1,9	+
chr21	34923936	34923937	ENSG00000159140.13:ENST00000356577.4:chr21:34923936:+	1,13	+
chr21	34926475	34926476	ENSG00000159140.13:ENST00000356577.4:chr21:34926475:+	1,19	+
chr21	38524254	38524255	ENSG00000182670.9:ENST00000355666.1:chr21:38524254:+	2,13	+
chr21	38528974	38528975	ENSG00000182670.9:ENST00000355666.1:chr21:38528974:+	1,13	+
chr22	20103823	20103824	ENSG00000099899.10:ENST00000252136.7:chr22:20103823:-	1,12	-
chr4	10089533	10089534	ENSG00000071127.12:ENST00000382452.2:chr4:10089533:-	1,79	-
chr4	10079377	10079378	ENSG00000071127.12:ENST00000382452.2:chr4:10079377:-	1,79	-
chr6	39880115	39880116	ENSG00000124615.13:ENST00000373188.2:chr6:39880115:-	1,7	-
chr6	39876845	39876846	ENSG00000124615.13:ENST00000373188.2:chr6:39876845:-	1,7	-
chr10	28897281	28897282	ENSG00000095787.17:ENST00000375646.1:chr10:28897281:+	1,4	+
chr12	58110254	58110255	ENSG00000135506.11:ENST00000389142.5:chr12:58110254:+	1,9	+
chr13	53035937	53035938	ENSG00000136108.10:ENST00000378037.5:chr13:53035937:+	1,90	+
chr15	42528587	42528588	ENSG00000103978.11:ENST00000389834.4:chr15:42528587:-	1,23	-
chr16	31196404	31196405	ENSG00000089280.14:ENST00000380244.3:chr16:31196404:+	1,40	+
chr16	31196419	31196420	ENSG00000089280.14:ENST00000380244.3:chr16:31196419:+	1,40	+
chr20	17930802	17930803	ENSG00000089006.12:ENST00000377768.3:chr20:17930802:-	1,28	-
chrX	64752462	64752463	ENSG00000001497.12:ENST00000374807.5:chrX:64752462:-	1,56	-
chrX	64744105	64744106	ENSG00000001497.12:ENST00000374807.5:chrX:64744105:-	1,55	-
chr7	99669547	99669548	ENSG00000166526.12:ENST00000299667.4:chr7:99669547:-	1,5	-
chr9	131117466	131117467	ENSG00000167114.8:ENST00000300456.4:chr9:131117466:+	1,1	+
chr10	102306931	102306932	ENSG00000166135.9:ENST00000299163.6:chr10:102306931:+	1,22	+
chr11	4127421	4127422	ENSG00000167325.10:ENST00000300738.5:chr11:4127421:+	1232	+
chr11	4153637	4153638	ENSG00000167325.10:ENST00000300738.5:chr11:4153637:+	1231	+
chr11	6635804	6635805	ENSG00000166340.10:ENST00000299427.6:chr11:6635804:-	1,13	-
chr11	77820527	77820528	ENSG00000159063.8:ENST00000299626.5:chr11:77820527:-	1,62	-
chr12	49579107	49579108	ENSG00000167552.9:ENST00000301071.7:chr12:49579107:-	1,68	-
chr12	49579159	49579160	ENSG00000167552.9:ENST00000301071.7:chr12:49579159:-	1,68	-
chr12	49579728	49579729	ENSG00000167552.9:ENST00000301071.7:chr12:49579728:-	1,68	-
chr12	102224351	102224352	ENSG00000111670.10:ENST00000299314.7:chr12:102224351:-	1,16	-
chr12	104324302	104324303	ENSG00000166598.8:ENST00000299767.5:chr12:104324302:+	1756	+
chr12	104325301	104325302	ENSG00000166598.8:ENST00000299767.5:chr12:104325301:+	1756	+
chr12	104326664	104326665	ENSG00000166598.8:ENST00000299767.5:chr12:104326664:+	1770	+
chr12	104327754	104327755	ENSG00000166598.8:ENST00000299767.5:chr12:104327754:+	1771	+
chr12	104327924	104327925	ENSG00000166598.8:ENST00000299767.5:chr12:104327924:+	1778	+
chr12	104327927	104327928	ENSG00000166598.8:ENST00000299767.5:chr12:104327927:+	1778	+
chr12	104327972	104327973	ENSG00000166598.8:ENST00000299767.5:chr12:104327972:+	1781	+
chr12	104328058	104328059	ENSG00000166598.8:ENST00000299767.5:chr12:104328058:+	1783	+
chr12	104331478	104331479	ENSG00000166598.8:ENST00000299767.5:chr12:104331478:+	2783	+
chr12	104331529	104331530	ENSG00000166598.8:ENST00000299767.5:chr12:104331529:+	1783	+
chr12	104331545	104331546	ENSG00000166598.8:ENST00000299767.5:chr12:104331545:+	1782	+
chr12	104331556	104331557	ENSG00000166598.8:ENST00000299767.5:chr12:104331556:+	1782	+
chr12	104332222	104332223	ENSG00000166598.8:ENST00000299767.5:chr12:104332222:+	1779	+
chr12	104337083	104337084	ENSG00000166598.8:ENST00000299767.5:chr12:104337083:+	1773	+
chr12	104337645	104337646	ENSG00000166598.8:ENST00000299767.5:chr12:104337645:+	1775	+
chr12	104340449	104340450	ENSG00000166598.8:ENST00000299767.5:chr12:104340449:+	1774	+
chr12	120599811	120599812	ENSG00000089154.6:ENST00000300648.6:chr12:120599811:-	1,4	-
chr15	44059068	44059069	ENSG00000167004.8:ENST00000300289.5:chr15:44059068:+	1105	+
chr15	78885523	78885524	ENSG00000169684.9:ENST00000299565.5:chr15:78885523:+	1,4	+
chr16	22335846	22335847	ENSG00000058600.11:ENST00000299853.5:chr16:22335846:+	1,56	+
chr16	22337514	22337515	ENSG00000058600.11:ENST00000299853.5:chr16:22337514:+	1,58	+
chr16	23690423	23690424	ENSG00000166851.10:ENST00000300093.4:chr16:23690423:+	1,58	+
chr16	23695303	23695304	ENSG00000166851.10:ENST00000300093.4:chr16:23695303:+	1,60	+
chr16	23700637	23700638	ENSG00000166851.10:ENST00000300093.4:chr16:23700637:+	1,60	+
chr16	75682249	75682250	ENSG00000166848.5:ENST00000300086.4:chr16:75682249:+	1111	+
chr16	88873500	88873501	ENSG00000167513.4:ENST00000301019.4:chr16:88873500:+	1,8	+
chr17	1339920	1339921	ENSG00000167193.7:ENST00000300574.2:chr17:1339920:-	1,38	-
chr17	37584009	37584010	ENSG00000125686.7:ENST00000300651.6:chr17:37584009:-	1,12	-
chr17	47486480	47486481	ENSG00000167085.7:ENST00000300408.3:chr17:47486480:-	1,40	-
chr17	71189244	71189245	ENSG00000166685.7:ENST00000299886.4:chr17:71189244:+	1,29	+
chr17	71204465	71204466	ENSG00000166685.7:ENST00000299886.4:chr17:71204465:+	1,30	+
chr19	16198891	16198892	ENSG00000167460.10:ENST00000300933.4:chr19:16198891:+	1,29	+
chr20	30358158	30358159	ENSG00000088325.11:ENST00000300403.6:chr20:30358158:+	1109	+
chr20	30381715	30381716	ENSG00000088325.11:ENST00000300403.6:chr20:30381715:+	1107	+
chr20	30382222	30382223	ENSG00000088325.11:ENST00000300403.6:chr20:30382222:+	1,95	+
chr9	86588875	86588876	ENSG00000165119.14:ENST00000376263.3:chr9:86588875:-	1183	-
chr9	86588307	86588308	ENSG00000165119.14:ENST00000376263.3:chr9:86588307:-	1183	-
chr9	86585181	86585182	ENSG00000165119.14:ENST00000376263.3:chr9:86585181:-	1183	-
chr9	116039000	116039001	ENSG00000136875.8:ENST00000374198.4:chr9:116039000:+	1,5	+
chr9	124093673	124093674	ENSG00000148180.12:ENST00000373818.4:chr9:124093673:+	1,3	+
chr10	27408354	27408355	ENSG00000136758.14:ENST00000376016.3:chr10:27408354:-	1,84	-
chr10	32101749	32101750	ENSG00000165322.13:ENST00000375250.5:chr10:32101749:-	1,3	-
chr13	95887066	95887067	ENSG00000125257.9:ENST00000376887.4:chr13:95887066:-	1,12	-
chr13	95723925	95723926	ENSG00000125257.9:ENST00000376887.4:chr13:95723925:-	1,15	-
chr13	103275309	103275310	ENSG00000134900.7:ENST00000376065.4:chr13:103275309:+	1,12	+
chr13	103297319	103297320	ENSG00000134900.7:ENST00000376065.4:chr13:103297319:+	1,12	+
chrX	54836324	54836325	ENSG00000102316.12:ENST00000375068.1:chrX:54836324:+	1,38	+
chrX	54836325	54836326	ENSG00000102316.12:ENST00000375068.1:chrX:54836325:+	1,38	+
chrX	54839402	54839403	ENSG00000102316.12:ENST00000375068.1:chrX:54839402:+	1,38	+
chr1	85733519	85733520	ENSG00000142867.8:ENST00000370580.1:chr1:85733519:-	1,16	-
chr1	89298430	89298431	ENSG00000065243.14:ENST00000370521.3:chr1:89298430:+	1,47	+
chr1	92755760	92755761	ENSG00000174842.12:ENST00000370360.3:chr1:92755760:-	1,28	-
chr1	92729243	92729244	ENSG00000174842.12:ENST00000370360.3:chr1:92729243:-	1,30	-
chr1	92712187	92712188	ENSG00000174842.12:ENST00000370360.3:chr1:92712187:-	1,30	-
chr1	100524265	100524266	ENSG00000156875.9:ENST00000370152.3:chr1:100524265:+	1,36	+
chr1	100706374	100706375	ENSG00000137992.10:ENST00000370132.4:chr1:100706374:-	1,13	-
chr1	100696296	100696297	ENSG00000137992.10:ENST00000370132.4:chr1:100696296:-	1,13	-
chr1	110129352	110129353	ENSG00000065135.7:ENST00000369851.4:chr1:110129352:+	1124	+
chr1	110129484	110129485	ENSG00000065135.7:ENST00000369851.4:chr1:110129484:+	1125	+
chr1	110129499	110129500	ENSG00000065135.7:ENST00000369851.4:chr1:110129499:+	1125	+
chr1	110200490	110200491	ENSG00000168765.11:ENST00000369836.4:chr1:110200490:+	1,2	+
chr6	64289171	64289172	ENSG00000112245.6:ENST00000370651.3:chr6:64289171:+	1157	+
chr6	76423531	76423532	ENSG00000112701.13:ENST00000370010.2:chr6:76423531:+	1,7	+
chr10	101953155	101953156	ENSG00000213341.6:ENST00000370397.7:chr10:101953155:-	1,57	-
chr10	102112132	102112133	ENSG00000099194.5:ENST00000370355.2:chr10:102112132:+	1229	+
chr10	102114282	102114283	ENSG00000099194.5:ENST00000370355.2:chr10:102114282:+	1233	+
chr10	102120518	102120519	ENSG00000099194.5:ENST00000370355.2:chr10:102120518:+	1237	+
chr10	104245412	104245413	ENSG00000138107.7:ENST00000369905.4:chr10:104245412:-	1,48	-
chr10	104244049	104244050	ENSG00000138107.7:ENST00000369905.4:chr10:104244049:-	1,48	-
chr10	104244054	104244055	ENSG00000138107.7:ENST00000369905.4:chr10:104244054:-	1,48	-
chr10	104263941	104263942	ENSG00000107882.7:ENST00000369902.3:chr10:104263941:+	1,8	+
chr10	105108685	105108686	ENSG00000156374.10:ENST00000369847.3:chr10:105108685:-	2,38	-
chr10	105181206	105181207	ENSG00000148843.9:ENST00000369797.3:chr10:105181206:+	1,39	+
chr20	61430957	61430958	ENSG00000101189.5:ENST00000370487.3:chr20:61430957:+	1,5	+
chrX	153608713	153608714	ENSG00000102119.6:ENST00000369842.4:chrX:153608713:+	1,7	+
chr2	136623824	136623825	ENSG00000076003.4:ENST00000264156.2:chr2:136623824:-	1215	-
chr2	136673865	136673866	ENSG00000115866.6:ENST00000264161.4:chr2:136673865:-	1162	-
chr2	209136301	209136302	ENSG00000115020.12:ENST00000264380.4:chr2:209136301:+	1,2	+
chr3	127324994	127324995	ENSG00000073111.9:ENST00000265056.7:chr3:127324994:+	1,79	+
chr3	127340576	127340577	ENSG00000073111.9:ENST00000265056.7:chr3:127340576:+	1,80	+
chr3	128525328	128525329	ENSG00000075785.8:ENST00000265062.3:chr3:128525328:+	1,37	+
chr4	25256760	25256761	ENSG00000038210.9:ENST00000264864.6:chr4:25256760:+	1,23	+
chr4	25265453	25265454	ENSG00000038210.9:ENST00000264864.6:chr4:25265453:+	1,23	+
chr4	41992693	41992694	ENSG00000014824.9:ENST00000264451.7:chr4:41992693:+	1,83	+
chr4	42088137	42088138	ENSG00000014824.9:ENST00000264451.7:chr4:42088137:+	1,85	+
chr4	48344008	48344009	ENSG00000109171.10:ENST00000264313.6:chr4:48344008:+	1,5	+
chr4	56212697	56212698	ENSG00000128039.6:ENST00000264228.4:chr4:56212697:+	1,9	+
chr4	77917630	77917631	ENSG00000138758.7:ENST00000264893.6:chr4:77917630:+	1,77	+
chr4	89319297	89319298	ENSG00000138642.10:ENST00000264346.7:chr4:89319297:+	1,2	+
chr4	160252586	160252587	ENSG00000109756.4:ENST00000264431.4:chr4:160252586:+	1,1	+
chr4	174169270	174169271	ENSG00000109586.7:ENST00000265000.4:chr4:174169270:+	1,21	+
chr5	6622210	6622211	ENSG00000037474.10:ENST00000264670.6:chr5:6622210:-	1129	-
chr5	6616935	6616936	ENSG00000037474.10:ENST00000264670.6:chr5:6616935:-	1130	-
chr5	6611907	6611908	ENSG00000037474.10:ENST00000264670.6:chr5:6611907:-	2130	-
chr5	6605473	6605474	ENSG00000037474.10:ENST00000264670.6:chr5:6605473:-	1130	-
chr5	32173929	32173930	ENSG00000113384.9:ENST00000265070.6:chr5:32173929:-	1,54	-
chr5	32126673	32126674	ENSG00000113384.9:ENST00000265070.6:chr5:32126673:-	1,56	-
chr5	32591702	32591703	ENSG00000113387.7:ENST00000265073.4:chr5:32591702:+	1,95	+
chr5	59901534	59901535	ENSG00000035499.8:ENST00000265036.5:chr5:59901534:-	1,27	-
chr5	59899282	59899283	ENSG00000035499.8:ENST00000265036.5:chr5:59899282:-	1,27	-
chr5	59895029	59895030	ENSG00000035499.8:ENST00000265036.5:chr5:59895029:-	1,27	-
chr5	80024729	80024730	ENSG00000113318.9:ENST00000265081.6:chr5:80024729:+	1,40	+
chr17	38137381	38137382	ENSG00000108344.10:ENST00000264639.4:chr17:38137381:+	1,53	+
chr17	38152557	38152558	ENSG00000108344.10:ENST00000264639.4:chr17:38152557:+	1,55	+
chr17	38323817	38323818	ENSG00000108349.10:ENST00000264645.7:chr17:38323817:+	1,73	+
chr17	38324506	38324507	ENSG00000108349.10:ENST00000264645.7:chr17:38324506:+	1,73	+
chr17	38324578	38324579	ENSG00000108349.10:ENST00000264645.7:chr17:38324578:+	1,74	+
chr17	38325624	38325625	ENSG00000108349.10:ENST00000264645.7:chr17:38325624:+	1,74	+
chr19	55913070	55913071	ENSG00000108106.9:ENST00000264552.9:chr19:55913070:-	1,6	-
chr1	151001263	151001264	ENSG00000143363.11:ENST00000271620.3:chr1:151001263:+	1,5	+
chr1	224475557	224475558	ENSG00000143748.13:ENST00000281701.6:chr1:224475557:-	1,45	-
chr1	225607420	225607421	ENSG00000143815.10:ENST00000272163.4:chr1:225607420:-	1151	-
chr1	225591139	225591140	ENSG00000143815.10:ENST00000272163.4:chr1:225591139:-	1154	-
chr2	174940189	174940190	ENSG00000138430.11:ENST00000284719.3:chr2:174940189:-	1,83	-
chr3	50005349	50005350	ENSG00000004534.10:ENST00000266022.4:chr3:50005349:+	1,24	+
chr3	112255438	112255439	ENSG00000144848.6:ENST00000283290.5:chr3:112255438:-	1,46	-
chr4	88104401	88104402	ENSG00000145332.9:ENST00000273963.5:chr4:88104401:-	1,27	-
chr4	185691592	185691593	ENSG00000151726.9:ENST00000281455.2:chr4:185691592:-	1,18	-
chr7	73604590	73604591	ENSG00000106682.10:ENST00000265753.8:chr7:73604590:+	1,41	+
chr8	117671189	117671190	ENSG00000147677.6:ENST00000276682.4:chr8:117671189:-	1,2	-
chr9	96294517	96294518	ENSG00000048828.12:ENST00000277165.6:chr9:96294517:+	1,22	+
chr11	124495569	124495570	ENSG00000154144.8:ENST00000284290.4:chr11:124495569:+	1,6	+
chr12	50146302	50146303	ENSG00000139644.8:ENST00000267115.5:chr12:50146302:+	1358	+
chr12	98926702	98926703	ENSG00000120802.9:ENST00000266732.4:chr12:98926702:+	1,91	+
chr12	98927891	98927892	ENSG00000120802.9:ENST00000266732.4:chr12:98927891:+	1,95	+
chr15	65112105	65112106	ENSG00000140451.8:ENST00000268043.4:chr15:65112105:-	1,2	-
chr17	8526504	8526505	ENSG00000133026.8:ENST00000269243.4:chr17:8526504:-	1,89	-
chr17	8526522	8526523	ENSG00000133026.8:ENST00000269243.4:chr17:8526522:-	1,89	-
chr17	17168258	17168259	ENSG00000141030.8:ENST00000268717.5:chr17:17168258:-	1,58	-
chr17	17165307	17165308	ENSG00000141030.8:ENST00000268717.5:chr17:17165307:-	1,58	-
chr17	57733340	57733341	ENSG00000141367.7:ENST00000269122.3:chr17:57733340:+	1107	+
chr17	57737868	57737869	ENSG00000141367.7:ENST00000269122.3:chr17:57737868:+	1110	+
chr17	57744266	57744267	ENSG00000141367.7:ENST00000269122.3:chr17:57744266:+	1126	+
chr17	57761026	57761027	ENSG00000141367.7:ENST00000269122.3:chr17:57761026:+	1159	+
chr18	33702113	33702114	ENSG00000141424.8:ENST00000269187.5:chr18:33702113:-	1,48	-
chr18	33694178	33694179	ENSG00000141424.8:ENST00000269187.5:chr18:33694178:-	1,49	-
chr4	17814717	17814718	ENSG00000109805.5:ENST00000251496.2:chr4:17814717:+	1115	+
chr4	17814756	17814757	ENSG00000109805.5:ENST00000251496.2:chr4:17814756:+	1115	+
chr4	17838849	17838850	ENSG00000109805.5:ENST00000251496.2:chr4:17838849:+	1100	+
chr4	17845021	17845022	ENSG00000109805.5:ENST00000251496.2:chr4:17845021:+	1,88	+
chr5	179132700	179132701	ENSG00000127022.10:ENST00000247461.4:chr5:179132700:+	1378	+
chr5	179135351	179135352	ENSG00000127022.10:ENST00000247461.4:chr5:179135351:+	1378	+
chr5	179136947	179136948	ENSG00000127022.10:ENST00000247461.4:chr5:179136947:+	1378	+
chr5	179137062	179137063	ENSG00000127022.10:ENST00000247461.4:chr5:179137062:+	1378	+
chr5	179146716	179146717	ENSG00000127022.10:ENST00000247461.4:chr5:179146716:+	1378	+
chr5	179149938	179149939	ENSG00000127022.10:ENST00000247461.4:chr5:179149938:+	1378	+
chr7	77221522	77221523	ENSG00000127947.11:ENST00000248594.6:chr7:77221522:+	2,2	+
chr7	92147552	92147553	ENSG00000127980.11:ENST00000248633.4:chr7:92147552:-	1,24	-
chr7	102949453	102949454	ENSG00000105819.9:ENST00000249269.4:chr7:102949453:+	1,79	+
chr14	55615085	55615086	ENSG00000126787.8:ENST00000247191.2:chr14:55615085:-	1,95	-
chr14	61115645	61115646	ENSG00000126778.7:ENST00000247182.6:chr14:61115645:-	1,25	-
chr14	77275466	77275467	ENSG00000013523.5:ENST00000251089.2:chr14:77275466:-	1,22	-
chr14	77272982	77272983	ENSG00000013523.5:ENST00000251089.2:chr14:77272982:-	1,23	-
chr15	52058649	52058650	ENSG00000128872.5:ENST00000249700.4:chr15:52058649:+	1,3	+
chr15	58306070	58306071	ENSG00000128918.10:ENST00000249750.4:chr15:58306070:-	1,27	-
chr15	68473598	68473599	ENSG00000033800.9:ENST00000249636.6:chr15:68473598:+	1,63	+
chr16	1741896	1741897	ENSG00000206053.8:ENST00000248098.3:chr16:1741896:+	1177	+
chr16	3767432	3767433	ENSG00000126602.6:ENST00000246957.5:chr16:3767432:-	1181	-
chr16	3712940	3712941	ENSG00000126602.6:ENST00000246957.5:chr16:3712940:-	1181	-
chr16	51185086	51185087	ENSG00000103449.7:ENST00000251020.4:chr16:51185086:-	1,1	-
chr16	51171284	51171285	ENSG00000103449.7:ENST00000251020.4:chr16:51171284:-	1,1	-
chr18	57026368	57026369	ENSG00000074695.5:ENST00000251047.5:chr18:57026368:-	1,44	-
chr19	34942974	34942975	ENSG00000126261.8:ENST00000246548.4:chr19:34942974:+	1,70	+
chr19	34942981	34942982	ENSG00000126261.8:ENST00000246548.4:chr19:34942981:+	1,70	+
chr19	48254274	48254275	ENSG00000105373.14:ENST00000246802.5:chr19:48254274:+	1,16	+
chr19	48258712	48258713	ENSG00000105373.14:ENST00000246802.5:chr19:48258712:+	1,16	+
chr20	32661648	32661649	ENSG00000125970.7:ENST00000246194.3:chr20:32661648:+	1,12	+
chr20	32666345	32666346	ENSG00000125970.7:ENST00000246194.3:chr20:32666345:+	1,12	+
chr22	29168929	29168930	ENSG00000159873.5:ENST00000249064.4:chr22:29168929:+	1116	+
chr22	32352738	32352739	ENSG00000128245.10:ENST00000248975.5:chr22:32352738:+	1,67	+
chr1	20964585	20964586	ENSG00000158828.5:ENST00000321556.4:chr1:20964585:+	1,35	+
chr1	43161890	43161891	ENSG00000065978.13:ENST00000321358.7:chr1:43161890:+	1352	+
chr2	128477053	128477054	ENSG00000136709.7:ENST00000322313.4:chr2:128477053:-	1,6	-
chr2	232326287	232326288	ENSG00000115053.11:ENST00000322723.4:chr2:232326287:-	11276	-
chr2	232326504	232326505	ENSG00000115053.11:ENST00000322723.4:chr2:232326504:-	11248	-
chr2	232326527	232326528	ENSG00000115053.11:ENST00000322723.4:chr2:232326527:-	11246	-
chr2	232326548	232326549	ENSG00000115053.11:ENST00000322723.4:chr2:232326548:-	11246	-
chr2	232326661	232326662	ENSG00000115053.11:ENST00000322723.4:chr2:232326661:-	11240	-
chr2	232326663	232326664	ENSG00000115053.11:ENST00000322723.4:chr2:232326663:-	21240	-
chr2	232325573	232325574	ENSG00000115053.11:ENST00000322723.4:chr2:232325573:-	11278	-
chr2	232325215	232325216	ENSG00000115053.11:ENST00000322723.4:chr2:232325215:-	21295	-
chr2	232325256	232325257	ENSG00000115053.11:ENST00000322723.4:chr2:232325256:-	11291	-
chr2	232324879	232324880	ENSG00000115053.11:ENST00000322723.4:chr2:232324879:-	11301	-
chr2	232324981	232324982	ENSG00000115053.11:ENST00000322723.4:chr2:232324981:-	11297	-
chr2	232324985	232324986	ENSG00000115053.11:ENST00000322723.4:chr2:232324985:-	11297	-
chr2	232324994	232324995	ENSG00000115053.11:ENST00000322723.4:chr2:232324994:-	11296	-
chr2	232322384	232322385	ENSG00000115053.11:ENST00000322723.4:chr2:232322384:-	11297	-
chr2	232322409	232322410	ENSG00000115053.11:ENST00000322723.4:chr2:232322409:-	11298	-
chr2	232322419	232322420	ENSG00000115053.11:ENST00000322723.4:chr2:232322419:-	21292	-
chr2	232320735	232320736	ENSG00000115053.11:ENST00000322723.4:chr2:232320735:-	11297	-
chr2	232320763	232320764	ENSG00000115053.11:ENST00000322723.4:chr2:232320763:-	11297	-
chr2	232320127	232320128	ENSG00000115053.11:ENST00000322723.4:chr2:232320127:-	11297	-
chr2	232320290	232320291	ENSG00000115053.11:ENST00000322723.4:chr2:232320290:-	11297	-
chr3	15626779	15626780	ENSG00000131373.10:ENST00000321169.5:chr3:15626779:-	1,21	-
chr3	15613275	15613276	ENSG00000131373.10:ENST00000321169.5:chr3:15613275:-	1,21	-
chr3	15604946	15604947	ENSG00000131373.10:ENST00000321169.5:chr3:15604946:-	1,21	-
chr3	51429896	51429897	ENSG00000179837.6:ENST00000323686.4:chr3:51429896:+	1,19	+
chr3	51431127	51431128	ENSG00000179837.6:ENST00000323686.4:chr3:51431127:+	1,20	+
chr3	100274109	100274110	ENSG00000181458.6:ENST00000323523.4:chr3:100274109:+	1,2	+
chr3	127806613	127806614	ENSG00000175792.7:ENST00000322623.5:chr3:127806613:-	1,83	-
chr3	127800246	127800247	ENSG00000175792.7:ENST00000322623.5:chr3:127800246:-	1,83	-
chr4	68527919	68527920	ENSG00000033178.8:ENST00000322244.5:chr4:68527919:-	1,43	-
chr4	68501252	68501253	ENSG00000033178.8:ENST00000322244.5:chr4:68501252:-	1,45	-
chr4	68500180	68500181	ENSG00000033178.8:ENST00000322244.5:chr4:68500180:-	1,45	-
chr4	141446705	141446706	ENSG00000179387.5:ENST00000323570.3:chr4:141446705:+	1,38	+
chr5	139947399	139947400	ENSG00000176087.10:ENST00000323146.3:chr5:139947399:+	2,67	+
chr5	174940480	174940481	ENSG00000164466.8:ENST00000321442.5:chr5:174940480:+	1100	+
chr6	160205802	160205803	ENSG00000120438.7:ENST00000321394.7:chr6:160205802:-	1266	-
chr6	160205097	160205098	ENSG00000120438.7:ENST00000321394.7:chr6:160205097:-	1266	-
chr6	160200961	160200962	ENSG00000120438.7:ENST00000321394.7:chr6:160200961:-	1266	-
chr6	160201048	160201049	ENSG00000120438.7:ENST00000321394.7:chr6:160201048:-	1267	-
chr6	160200171	160200172	ENSG00000120438.7:ENST00000321394.7:chr6:160200171:-	1267	-
chr11	65819920	65819921	ENSG00000087365.10:ENST00000322535.6:chr11:65819920:+	1182	+
chr11	65825617	65825618	ENSG00000087365.10:ENST00000322535.6:chr11:65825617:+	1186	+
chr11	65826508	65826509	ENSG00000087365.10:ENST00000322535.6:chr11:65826508:+	1183	+
chr11	65827333	65827334	ENSG00000087365.10:ENST00000322535.6:chr11:65827333:+	1183	+
chr11	65829443	65829444	ENSG00000087365.10:ENST00000322535.6:chr11:65829443:+	1183	+
chr11	65830487	65830488	ENSG00000087365.10:ENST00000322535.6:chr11:65830487:+	1183	+
chr11	65830904	65830905	ENSG00000087365.10:ENST00000322535.6:chr11:65830904:+	1183	+
chr11	65835637	65835638	ENSG00000087365.10:ENST00000322535.6:chr11:65835637:+	1181	+
chr11	108564252	108564253	ENSG00000178105.5:ENST00000322536.3:chr11:108564252:+	1111	+
chr11	108577485	108577486	ENSG00000178105.5:ENST00000322536.3:chr11:108577485:+	1112	+
chr12	93171828	93171829	ENSG00000102189.12:ENST00000322349.8:chr12:93171828:-	1,2	-
chr15	71055725	71055726	ENSG00000137831.10:ENST00000322954.6:chr15:71055725:-	1,34	-
chr17	18167145	18167146	ENSG00000177427.8:ENST00000323019.4:chr17:18167145:+	1,7	+
chr17	26911375	26911376	ENSG00000076382.12:ENST00000321765.5:chr17:26911375:-	1,77	-
chr17	30303557	30303558	ENSG00000178691.6:ENST00000322652.5:chr17:30303557:+	1,11	+
chr17	39978050	39978051	ENSG00000141756.14:ENST00000321562.4:chr17:39978050:+	1,30	+
chr18	48434550	48434551	ENSG00000082212.7:ENST00000321341.5:chr18:48434550:+	1,25	+
chr18	48473397	48473398	ENSG00000082212.7:ENST00000321341.5:chr18:48473397:+	1,27	+
chr19	30199315	30199316	ENSG00000131943.13:ENST00000323670.9:chr19:30199315:-	1,5	-
chr19	52709250	52709251	ENSG00000105568.13:ENST00000322088.6:chr19:52709250:+	1,99	+
chr19	52724330	52724331	ENSG00000105568.13:ENST00000322088.6:chr19:52724330:+	1,99	+
chr20	44592174	44592175	ENSG00000198026.6:ENST00000322927.2:chr20:44592174:-	1,5	-
chr1	19557449	19557450	ENSG00000127463.9:ENST00000477853.1:chr1:19557449:-	2,33	-
chr3	142741486	142741487	ENSG00000163714.13:ENST00000473835.2:chr3:142741486:+	1149	+
chr3	142741739	142741740	ENSG00000163714.13:ENST00000473835.2:chr3:142741739:+	1149	+
chr3	142746043	142746044	ENSG00000163714.13:ENST00000473835.2:chr3:142746043:+	1152	+
chr5	133537559	133537560	ENSG00000113575.5:ENST00000481195.1:chr5:133537559:-	1244	-
chr14	67589035	67589036	ENSG00000171723.11:ENST00000478722.1:chr14:67589035:+	1,26	+
chr16	30455756	30455757	ENSG00000179918.15:ENST00000478753.2:chr16:30455756:-	1179	-
chr16	30456091	30456092	ENSG00000179918.15:ENST00000478753.2:chr16:30456091:-	2179	-
chr16	30456514	30456515	ENSG00000179918.15:ENST00000478753.2:chr16:30456514:-	1179	-
chr16	30457001	30457002	ENSG00000179918.15:ENST00000478753.2:chr16:30457001:-	1178	-
chr5	110456782	110456783	ENSG00000134987.7:ENST00000513710.2:chr5:110456782:+	1,7	+
chr2	28268629	28268630	ENSG00000158019.16:ENST00000379624.1:chr2:28268629:+	1,12	+
chr5	94918877	94918878	ENSG00000164291.12:ENST00000380009.4:chr5:94918877:+	1,5	+
chr5	94927301	94927302	ENSG00000164291.12:ENST00000380009.4:chr5:94927301:+	1,5	+
chr5	122143977	122143978	ENSG00000205302.2:ENST00000379516.2:chr5:122143977:+	1,82	+
chr6	8097690	8097691	ENSG00000124802.7:ENST00000379715.5:chr6:8097690:-	1,4	-
chr9	19076667	19076668	ENSG00000147874.6:ENST00000380502.3:chr9:19076667:-	1,56	-
chr9	19058435	19058436	ENSG00000147874.6:ENST00000380502.3:chr9:19058435:-	1,54	-
chr9	26962049	26962050	ENSG00000096872.11:ENST00000380062.5:chr9:26962049:+	1,18	+
chr9	27567108	27567109	ENSG00000147894.10:ENST00000380003.3:chr9:27567108:-	1,9	-
chr9	33167102	33167103	ENSG00000086062.8:ENST00000379731.4:chr9:33167102:-	1,5	-
chr10	5827913	5827914	ENSG00000057608.12:ENST00000380191.4:chr10:5827913:-	1,74	-
chr12	48388211	48388212	ENSG00000139219.13:ENST00000380518.3:chr12:48388211:-	1,11	-
chr12	56619166	56619167	ENSG00000139579.8:ENST00000380198.2:chr12:56619166:+	1,7	+
chr15	72767222	72767223	ENSG00000166233.8:ENST00000379887.4:chr15:72767222:+	1,7	+
chr16	30536130	30536131	ENSG00000169957.8:ENST00000380412.5:chr16:30536130:-	1,12	-
chr16	30536401	30536402	ENSG00000169957.8:ENST00000380412.5:chr16:30536401:-	1,12	-
chr16	57789955	57789956	ENSG00000140854.8:ENST00000379661.3:chr16:57789955:+	1,23	+
chr20	3127711	3127712	ENSG00000215251.3:ENST00000380266.3:chr20:3127711:-	1,44	-
chrX	16881200	16881201	ENSG00000102054.13:ENST00000380087.2:chrX:16881200:-	1348	-
chrX	16876881	16876882	ENSG00000102054.13:ENST00000380087.2:chrX:16876881:-	1346	-
chrX	16871899	16871900	ENSG00000102054.13:ENST00000380087.2:chrX:16871899:-	3346	-
chr1	36645546	36645547	ENSG00000116871.11:ENST00000316156.4:chr1:36645546:+	1,4	+
chr1	151211650	151211651	ENSG00000143398.15:ENST00000349792.5:chr1:151211650:+	1,94	+
chr1	154223582	154223583	ENSG00000143569.14:ENST00000343815.6:chr1:154223582:+	1,11	+
chr3	121435823	121435824	ENSG00000173230.11:ENST00000340645.5:chr3:121435823:-	1,14	-
chr4	83294818	83294819	ENSG00000138668.14:ENST00000313899.7:chr4:83294818:-	1,28	-
chr7	65444512	65444513	ENSG00000169919.12:ENST00000345660.6:chr7:65444512:-	1,16	-
chr8	37967938	37967939	ENSG00000129691.11:ENST00000343823.6:chr8:37967938:+	1,29	+
chr8	101733772	101733773	ENSG00000070756.9:ENST00000318607.5:chr8:101733772:-	1446	-
chr8	101727713	101727714	ENSG00000070756.9:ENST00000318607.5:chr8:101727713:-	1448	-
chr8	101725406	101725407	ENSG00000070756.9:ENST00000318607.5:chr8:101725406:-	1448	-
chr8	101724999	101725000	ENSG00000070756.9:ENST00000318607.5:chr8:101724999:-	1448	-
chr8	101724660	101724661	ENSG00000070756.9:ENST00000318607.5:chr8:101724660:-	1448	-
chr8	101721718	101721719	ENSG00000070756.9:ENST00000318607.5:chr8:101721718:-	1449	-
chr8	101721763	101721764	ENSG00000070756.9:ENST00000318607.5:chr8:101721763:-	1449	-
chr8	101721893	101721894	ENSG00000070756.9:ENST00000318607.5:chr8:101721893:-	1449	-
chr8	101719155	101719156	ENSG00000070756.9:ENST00000318607.5:chr8:101719155:-	1449	-
chr8	101719023	101719024	ENSG00000070756.9:ENST00000318607.5:chr8:101719023:-	1449	-
chr8	101717228	101717229	ENSG00000070756.9:ENST00000318607.5:chr8:101717228:-	1449	-
chr9	33311139	33311140	ENSG00000086102.14:ENST00000318524.6:chr9:33311139:+	1,36	+
chr9	33342784	33342785	ENSG00000086102.14:ENST00000318524.6:chr9:33342784:+	1,36	+
chr9	33347725	33347726	ENSG00000086102.14:ENST00000318524.6:chr9:33347725:+	1,36	+
chr10	51579187	51579188	ENSG00000138293.15:ENST00000344348.6:chr10:51579187:+	1,9	+
chr10	51827967	51827968	ENSG00000099290.11:ENST00000351071.6:chr10:51827967:+	1,11	+
chr11	61183903	61183904	ENSG00000149532.11:ENST00000340437.4:chr11:61183903:-	1,2	-
chr11	95568563	95568564	ENSG00000087053.14:ENST00000346299.5:chr11:95568563:-	1,13	-
chr12	62783625	62783626	ENSG00000135655.9:ENST00000353364.3:chr12:62783625:+	1,21	+
chr12	62784974	62784975	ENSG00000135655.9:ENST00000353364.3:chr12:62784974:+	1,20	+
chr14	93185114	93185115	ENSG00000100600.10:ENST00000334869.4:chr14:93185114:-	1,42	-
chr14	100828178	100828179	ENSG00000140105.13:ENST00000355338.2:chr14:100828178:-	1,61	-
chr14	100809687	100809688	ENSG00000140105.13:ENST00000355338.2:chr14:100809687:-	1,61	-
chr15	66604102	66604103	ENSG00000166938.8:ENST00000319212.4:chr15:66604102:+	1,12	+
chr15	66624256	66624257	ENSG00000166938.8:ENST00000319212.4:chr15:66624256:+	1,10	+
chr16	30774829	30774830	ENSG00000103549.17:ENST00000324685.6:chr16:30774829:+	1,58	+
chr16	30783507	30783508	ENSG00000103549.17:ENST00000324685.6:chr16:30783507:+	1,63	+
chr16	58620518	58620519	ENSG00000125107.12:ENST00000317147.5:chr16:58620518:-	1,34	-
chr16	58620569	58620570	ENSG00000125107.12:ENST00000317147.5:chr16:58620569:-	1,34	-
chr16	58615270	58615271	ENSG00000125107.12:ENST00000317147.5:chr16:58615270:-	1,36	-
chr16	58571847	58571848	ENSG00000125107.12:ENST00000317147.5:chr16:58571847:-	1,49	-
chr16	58568207	58568208	ENSG00000125107.12:ENST00000317147.5:chr16:58568207:-	1,49	-
chr16	58568280	58568281	ENSG00000125107.12:ENST00000317147.5:chr16:58568280:-	1,49	-
chr1	40562885	40562886	ENSG00000131238.12:ENST00000433473.3:chr1:40562885:-	1200	-
chr3	12880885	12880886	ENSG00000144713.8:ENST00000429711.2:chr3:12880885:-	1,10	-
chr3	12880903	12880904	ENSG00000144713.8:ENST00000429711.2:chr3:12880903:-	1,10	-
chr5	43294867	43294868	ENSG00000112972.10:ENST00000433297.2:chr5:43294867:-	1,17	-
chr7	76131727	76131728	ENSG00000091073.15:ENST00000430490.2:chr7:76131727:+	1,2	+
chr9	95076957	95076958	ENSG00000198000.7:ENST00000432670.2:chr9:95076957:-	1,33	-
chr9	95077509	95077510	ENSG00000198000.7:ENST00000432670.2:chr9:95077509:-	1,33	-
chr9	95069200	95069201	ENSG00000198000.7:ENST00000432670.2:chr9:95069200:-	1,31	-
chr19	5651033	5651034	ENSG00000160633.8:ENST00000433404.1:chr19:5651033:+	1,9	+
chr20	3842078	3842079	ENSG00000088888.13:ENST00000428216.2:chr20:3842078:+	1,17	+
chr22	29730293	29730294	ENSG00000100280.12:ENST00000432560.2:chr22:29730293:-	1,33	-
chr16	11935665	11935666	ENSG00000171490.8:ENST00000571133.1:chr16:11935665:-	1124	-
chr17	5322723	5322724	ENSG00000108559.7:ENST00000573584.1:chr17:5322723:-	1,54	-
chr17	73258623	73258624	ENSG00000125445.6:ENST00000579002.1:chr17:73258623:+	1,4	+
chr18	47017814	47017815	ENSG00000265681.2:ENST00000580261.1:chr18:47017814:-	1,5	-
chr2	54895560	54895561	ENSG00000115306.11:ENST00000356805.4:chr2:54895560:+	1,18	+
chr2	219941163	219941164	ENSG00000187736.8:ENST00000356853.5:chr2:219941163:-	1,5	-
chr3	130427207	130427208	ENSG00000196455.3:ENST00000356763.3:chr3:130427207:-	1,44	-
chr3	130422714	130422715	ENSG00000196455.3:ENST00000356763.3:chr3:130422714:-	1,43	-
chr3	130409360	130409361	ENSG00000196455.3:ENST00000356763.3:chr3:130409360:-	1,43	-
chr4	8418185	8418186	ENSG00000087008.11:ENST00000356406.5:chr4:8418185:-	3,3	-
chr7	91714910	91714911	ENSG00000127914.12:ENST00000356239.3:chr7:91714910:+	2,2	+
chr7	102087195	102087196	ENSG00000160991.11:ENST00000356387.2:chr7:102087195:+	1,9	+
chr10	43883175	43883176	ENSG00000169813.12:ENST00000356053.3:chr10:43883175:-	2,12	-
chr17	7127533	7127534	ENSG00000072778.15:ENST00000356839.5:chr17:7127533:+	1,12	+
chr17	46136118	46136119	ENSG00000082641.11:ENST00000357480.5:chr17:46136118:+	1,18	+
chr17	65337156	65337157	ENSG00000197170.5:ENST00000356126.3:chr17:65337156:-	3,51	-
chr19	805185	805186	ENSG00000011304.12:ENST00000356948.6:chr19:805185:+	1129	+
chr19	808553	808554	ENSG00000011304.12:ENST00000356948.6:chr19:808553:+	1129	+
chr2	29160850	29160851	ENSG00000163811.7:ENST00000407426.3:chr2:29160850:+	1,58	+
chr2	29164392	29164393	ENSG00000163811.7:ENST00000407426.3:chr2:29164392:+	1,58	+
chr2	112991765	112991766	ENSG00000144161.8:ENST00000409573.2:chr2:112991765:-	1,2	-
chr2	242545730	242545731	ENSG00000176946.7:ENST00000407315.1:chr2:242545730:-	1,20	-
chr5	74681815	74681816	ENSG00000113163.11:ENST00000405807.4:chr5:74681815:-	1,1	-
chr19	8032586	8032587	ENSG00000066044.9:ENST00000407627.2:chr19:8032586:-	1160	-
chr19	8028668	8028669	ENSG00000066044.9:ENST00000407627.2:chr19:8028668:-	1163	-
chr22	19839636	19839637	ENSG00000215012.4:ENST00000405640.1:chr22:19839636:-	1,8	-
chr22	26902403	26902404	ENSG00000100109.12:ENST00000407690.1:chr22:26902403:-	1,43	-
chr22	26895548	26895549	ENSG00000100109.12:ENST00000407690.1:chr22:26895548:-	1,43	-
chr22	39262715	39262716	ENSG00000183741.7:ENST00000407418.3:chr22:39262715:-	1,9	-
chr1	32508216	32508217	ENSG00000121774.13:ENST00000327300.7:chr1:32508216:+	1135	+
chr3	48727116	48727117	ENSG00000068745.10:ENST00000328631.5:chr3:48727116:-	1,16	-
chr3	49065714	49065715	ENSG00000178035.7:ENST00000326739.4:chr3:49065714:-	1,64	-
chr3	49062687	49062688	ENSG00000178035.7:ENST00000326739.4:chr3:49062687:-	1,65	-
chr3	49061823	49061824	ENSG00000178035.7:ENST00000326739.4:chr3:49061823:-	1,65	-
chr3	49758060	49758061	ENSG00000164068.11:ENST00000327697.6:chr3:49758060:+	1,15	+
chr3	98541526	98541527	ENSG00000057019.11:ENST00000326840.6:chr3:98541526:-	1,26	-
chr4	83776127	83776128	ENSG00000138674.12:ENST00000326950.5:chr4:83776127:-	1,23	-
chr5	148725163	148725164	ENSG00000164284.10:ENST00000329271.3:chr5:148725163:+	1,72	+
chr6	30691779	30691780	ENSG00000196230.8:ENST00000327892.8:chr6:30691779:+	1,49	+
chr8	37623063	37623064	ENSG00000147471.7:ENST00000328195.3:chr8:37623063:+	1,45	+
chr10	5782005	5782006	ENSG00000108021.15:ENST00000328090.5:chr10:5782005:+	1,3	+
chr10	5791922	5791923	ENSG00000108021.15:ENST00000328090.5:chr10:5791922:+	1,19	+
chr10	5804538	5804539	ENSG00000108021.15:ENST00000328090.5:chr10:5804538:+	1,20	+
chr11	62339089	62339090	ENSG00000254772.5:ENST00000329251.4:chr11:62339089:-	1133	-
chr11	62327657	62327658	ENSG00000254772.5:ENST00000329251.4:chr11:62327657:-	1133	-
chr11	73962021	73962022	ENSG00000214517.4:ENST00000328257.8:chr11:73962021:+	1,52	+
chr11	120099677	120099678	ENSG00000184232.4:ENST00000328965.4:chr11:120099677:+	1,14	+
chr13	114525012	114525013	ENSG00000183087.10:ENST00000327773.6:chr13:114525012:-	1,15	-
chr17	18152465	18152466	ENSG00000177731.11:ENST00000327031.4:chr17:18152465:-	1,15	-
chr19	58722957	58722958	ENSG00000171606.13:ENST00000326804.4:chr19:58722957:+	1,10	+
chr8	128750558	128750559	ENSG00000136997.10:ENST00000377970.2:chr8:128750558:+	1,57	+
chr8	128753199	128753200	ENSG00000136997.10:ENST00000377970.2:chr8:128753199:+	1,59	+
chr9	74349766	74349767	ENSG00000135048.9:ENST00000377044.4:chr9:74349766:-	1,1	-
chr9	77599899	77599900	ENSG00000156017.8:ENST00000376834.3:chr9:77599899:-	1,60	-
chr11	64534685	64534686	ENSG00000168066.16:ENST00000377390.3:chr11:64534685:-	1,29	-
chr11	67166625	67166626	ENSG00000172531.10:ENST00000376745.4:chr11:67166625:-	1,15	-
chr12	106633333	106633334	ENSG00000136026.9:ENST00000378026.4:chr12:106633333:-	1,51	-
chr13	73355953	73355954	ENSG00000083520.10:ENST00000377767.4:chr13:73355953:-	1144	-
chr13	73346348	73346349	ENSG00000083520.10:ENST00000377767.4:chr13:73346348:-	1147	-
chr13	73337640	73337641	ENSG00000083520.10:ENST00000377767.4:chr13:73337640:-	1144	-
chr13	73336231	73336232	ENSG00000083520.10:ENST00000377767.4:chr13:73336231:-	1144	-
chr13	73335620	73335621	ENSG00000083520.10:ENST00000377767.4:chr13:73335620:-	1144	-
chr17	46000475	46000476	ENSG00000167182.11:ENST00000376741.4:chr17:46000475:+	1,3	+
chr20	17933291	17933292	ENSG00000089006.12:ENST00000377759.4:chr20:17933291:-	1,10	-
chr20	18491491	18491492	ENSG00000101310.10:ENST00000377475.3:chr20:18491491:+	1,70	+
chr20	18491594	18491595	ENSG00000101310.10:ENST00000377475.3:chr20:18491594:+	2,70	+
chr20	18505178	18505179	ENSG00000101310.10:ENST00000377475.3:chr20:18505178:+	1,70	+
chr20	21306962	21306963	ENSG00000088930.6:ENST00000377191.3:chr20:21306962:+	1,73	+
chr20	21314228	21314229	ENSG00000088930.6:ENST00000377191.3:chr20:21314228:+	1,73	+
chr20	21328794	21328795	ENSG00000088930.6:ENST00000377191.3:chr20:21328794:+	1,54	+
chr20	21369946	21369947	ENSG00000088930.6:ENST00000377191.3:chr20:21369946:+	1,54	+
chrX	47072493	47072494	ENSG00000130985.12:ENST00000377351.4:chrX:47072493:+	1,62	+
chrX	47426101	47426102	ENSG00000078061.8:ENST00000377045.4:chrX:47426101:+	1,9	+
chr2	3391446	3391447	ENSG00000171853.11:ENST00000382110.2:chr2:3391446:+	1,1	+
chr2	28117462	28117463	ENSG00000158019.16:ENST00000379632.2:chr2:28117462:+	1,1	+
chr2	198363402	198363403	ENSG00000144381.12:ENST00000388968.3:chr2:198363402:-	2815	-
chr2	198361909	198361910	ENSG00000144381.12:ENST00000388968.3:chr2:198361909:-	1815	-
chr2	198361919	198361920	ENSG00000144381.12:ENST00000388968.3:chr2:198361919:-	1815	-
chr2	198361964	198361965	ENSG00000144381.12:ENST00000388968.3:chr2:198361964:-	1815	-
chr2	198359431	198359432	ENSG00000144381.12:ENST00000388968.3:chr2:198359431:-	1815	-
chr2	198358100	198358101	ENSG00000144381.12:ENST00000388968.3:chr2:198358100:-	1815	-
chr2	198358135	198358136	ENSG00000144381.12:ENST00000388968.3:chr2:198358135:-	1815	-
chr2	198358141	198358142	ENSG00000144381.12:ENST00000388968.3:chr2:198358141:-	1815	-
chr2	198353888	198353889	ENSG00000144381.12:ENST00000388968.3:chr2:198353888:-	1815	-
chr2	198352585	198352586	ENSG00000144381.12:ENST00000388968.3:chr2:198352585:-	1762	-
chr3	58416505	58416506	ENSG00000168291.8:ENST00000383714.4:chr3:58416505:-	1,1	-
chr3	185542596	185542597	ENSG00000073792.11:ENST00000382199.2:chr3:185542596:-	1,10	-
chr3	185364824	185364825	ENSG00000073792.11:ENST00000382199.2:chr3:185364824:-	1,10	-
chr4	47916129	47916130	ENSG00000170448.7:ENST00000381538.3:chr4:47916129:-	1,13	-
chr4	57860825	57860826	ENSG00000047315.10:ENST00000381227.1:chr4:57860825:+	1,82	+
chr4	57860924	57860925	ENSG00000047315.10:ENST00000381227.1:chr4:57860924:+	1,82	+
chr4	57861557	57861558	ENSG00000047315.10:ENST00000381227.1:chr4:57861557:+	1,82	+
chr4	57889660	57889661	ENSG00000047315.10:ENST00000381227.1:chr4:57889660:+	1,82	+
chr4	57896378	57896379	ENSG00000047315.10:ENST00000381227.1:chr4:57896378:+	1,82	+
chr9	712176	712177	ENSG00000107104.14:ENST00000382297.2:chr9:712176:+	1,7	+
chr9	88667504	88667505	ENSG00000135052.12:ENST00000388711.3:chr9:88667504:-	1,10	-
chr12	48095291	48095292	ENSG00000005175.5:ENST00000380650.4:chr12:48095291:-	1,8	-
chr12	48084352	48084353	ENSG00000005175.5:ENST00000380650.4:chr12:48084352:-	1,8	-
chr12	53344641	53344642	ENSG00000111057.6:ENST00000388837.2:chr12:53344641:+	1,3	+
chr13	25911149	25911150	ENSG00000139496.11:ENST00000381736.3:chr13:25911149:+	1,29	+
chrX	16863197	16863198	ENSG00000102054.13:ENST00000380084.4:chrX:16863197:-	1,30	-
chrX	21887619	21887620	ENSG00000012174.7:ENST00000379484.5:chrX:21887619:+	1,48	+
chr1	52879562	52879563	ENSG00000134748.12:ENST00000257181.9:chr1:52879562:+	1,86	+
chr1	109884754	109884755	ENSG00000134243.7:ENST00000256637.6:chr1:109884754:-	1,26	-
chr1	109857348	109857349	ENSG00000134243.7:ENST00000256637.6:chr1:109857348:-	1,28	-
chr1	182993030	182993031	ENSG00000135862.5:ENST00000258341.4:chr1:182993030:+	1,16	+
chr1	182993145	182993146	ENSG00000135862.5:ENST00000258341.4:chr1:182993145:+	1,17	+
chr1	229773686	229773687	ENSG00000135763.5:ENST00000258243.2:chr1:229773686:+	1,20	+
chr2	73479861	73479862	ENSG00000135624.11:ENST00000258091.5:chr2:73479861:+	1112	+
chr4	71705431	71705432	ENSG00000132463.9:ENST00000254799.6:chr4:71705431:-	1,22	-
chr5	68470091	68470092	ENSG00000134057.10:ENST00000256442.5:chr5:68470091:+	1169	+
chr5	68473113	68473114	ENSG00000134057.10:ENST00000256442.5:chr5:68473113:+	1170	+
chr5	68565037	68565038	ENSG00000134058.6:ENST00000256443.3:chr5:68565037:+	1,8	+
chr5	118835082	118835083	ENSG00000133835.10:ENST00000256216.6:chr5:118835082:+	1,71	+
chr5	118860963	118860964	ENSG00000133835.10:ENST00000256216.6:chr5:118860963:+	1,71	+
chr5	118866980	118866981	ENSG00000133835.10:ENST00000256216.6:chr5:118866980:+	1,71	+
chr11	34130337	34130338	ENSG00000135372.4:ENST00000257829.3:chr11:34130337:+	1,62	+
chr11	34153055	34153056	ENSG00000135372.4:ENST00000257829.3:chr11:34153055:+	1,71	+
chr11	34162012	34162013	ENSG00000135372.4:ENST00000257829.3:chr11:34162012:+	1,73	+
chr12	46758298	46758299	ENSG00000134294.9:ENST00000256689.5:chr12:46758298:-	1129	-
chr12	46756806	46756807	ENSG00000134294.9:ENST00000256689.5:chr12:46756806:-	1130	-
chr12	109520697	109520698	ENSG00000135093.8:ENST00000257548.5:chr12:109520697:+	1,23	+
chr13	31233102	31233103	ENSG00000132952.7:ENST00000255304.4:chr13:31233102:+	1,12	+
chr13	37393726	37393727	ENSG00000133111.3:ENST00000255476.2:chr13:37393726:+	1,33	+
chr16	15977963	15977964	ENSG00000133393.8:ENST00000255759.6:chr16:15977963:-	1,37	-
chr16	15967394	15967395	ENSG00000133393.8:ENST00000255759.6:chr16:15967394:-	1,37	-
chr16	67270480	67270481	ENSG00000135723.9:ENST00000258201.4:chr16:67270480:-	1,22	-
chr18	20817205	20817206	ENSG00000134508.8:ENST00000256925.7:chr18:20817205:+	3,4	+
chr18	55283165	55283166	ENSG00000134440.7:ENST00000256854.5:chr18:55283165:-	1,93	-
chr18	55276663	55276664	ENSG00000134440.7:ENST00000256854.5:chr18:55276663:-	1,94	-
chr20	11904284	11904285	ENSG00000132640.10:ENST00000254977.3:chr20:11904284:+	1,36	+
chr22	21063653	21063654	ENSG00000241973.6:ENST00000255882.6:chr22:21063653:-	1,1	-
chr1	182825669	182825670	ENSG00000135829.12:ENST00000367549.3:chr1:182825669:+	1235	+
chr1	182825687	182825688	ENSG00000135829.12:ENST00000367549.3:chr1:182825687:+	1237	+
chr1	182835580	182835581	ENSG00000135829.12:ENST00000367549.3:chr1:182835580:+	1249	+
chr1	182844022	182844023	ENSG00000135829.12:ENST00000367549.3:chr1:182844022:+	1258	+
chr1	182845263	182845264	ENSG00000135829.12:ENST00000367549.3:chr1:182845263:+	1257	+
chr1	182847275	182847276	ENSG00000135829.12:ENST00000367549.3:chr1:182847275:+	2261	+
chr1	182849675	182849676	ENSG00000135829.12:ENST00000367549.3:chr1:182849675:+	1261	+
chr1	182852477	182852478	ENSG00000135829.12:ENST00000367549.3:chr1:182852477:+	1261	+
chr1	186342502	186342503	ENSG00000047410.9:ENST00000367478.4:chr1:186342502:-	1,28	-
chr1	186330933	186330934	ENSG00000047410.9:ENST00000367478.4:chr1:186330933:-	1,29	-
chr1	186303497	186303498	ENSG00000047410.9:ENST00000367478.4:chr1:186303497:-	1,49	-
chr1	186909171	186909172	ENSG00000116711.8:ENST00000367466.3:chr1:186909171:+	1,15	+
chr1	193111166	193111167	ENSG00000134371.9:ENST00000367435.3:chr1:193111166:+	1,56	+
chr1	200569570	200569571	ENSG00000118193.7:ENST00000367350.4:chr1:200569570:-	1,8	-
chr1	201926475	201926476	ENSG00000134375.6:ENST00000367287.4:chr1:201926475:+	1,50	+
chr1	202743748	202743749	ENSG00000117139.12:ENST00000367265.3:chr1:202743748:-	1,29	-
chr1	202711553	202711554	ENSG00000117139.12:ENST00000367265.3:chr1:202711553:-	1,32	-
chr1	212119975	212119976	ENSG00000143493.8:ENST00000366994.3:chr1:212119975:-	1,56	-
chr1	213032204	213032205	ENSG00000162769.8:ENST00000366971.4:chr1:213032204:+	1,17	+
chr1	213032234	213032235	ENSG00000162769.8:ENST00000366971.4:chr1:213032234:+	1,17	+
chr1	213303071	213303072	ENSG00000136643.7:ENST00000366960.3:chr1:213303071:+	1,5	+
chr1	214787175	214787176	ENSG00000117724.8:ENST00000366955.3:chr1:214787175:+	1,56	+
chr1	214816012	214816013	ENSG00000117724.8:ENST00000366955.3:chr1:214816012:+	1,32	+
chr1	220213590	220213591	ENSG00000136628.13:ENST00000366923.3:chr1:220213590:-	1274	-
chr1	220206949	220206950	ENSG00000136628.13:ENST00000366923.3:chr1:220206949:-	1276	-
chr1	220198501	220198502	ENSG00000136628.13:ENST00000366923.3:chr1:220198501:-	1280	-
chr1	220198592	220198593	ENSG00000136628.13:ENST00000366923.3:chr1:220198592:-	1280	-
chr1	220195737	220195738	ENSG00000136628.13:ENST00000366923.3:chr1:220195737:-	1285	-
chr1	220192400	220192401	ENSG00000136628.13:ENST00000366923.3:chr1:220192400:-	1289	-
chr1	220320874	220320875	ENSG00000067704.8:ENST00000366922.1:chr1:220320874:+	1,21	+
chr1	220971351	220971352	ENSG00000186205.8:ENST00000366910.5:chr1:220971351:+	1,53	+
chr6	139226244	139226245	ENSG00000135597.14:ENST00000367663.4:chr6:139226244:-	1,3	-
chr6	145051545	145051546	ENSG00000152818.14:ENST00000367545.3:chr6:145051545:+	1,2	+
chr6	149887588	149887589	ENSG00000055211.8:ENST00000367419.5:chr6:149887588:+	1,9	+
chr6	155581513	155581514	ENSG00000029639.6:ENST00000367166.4:chr6:155581513:-	1,6	-
chr6	159197440	159197441	ENSG00000092820.13:ENST00000367075.3:chr6:159197440:-	1,68	-
chr6	160199262	160199263	ENSG00000120437.7:ENST00000367048.4:chr6:160199262:+	1,17	+
chr4	151203741	151203742	ENSG00000198589.6:ENST00000535741.1:chr4:151203741:-	1,10	-
chr11	72019642	72019643	ENSG00000162129.8:ENST00000538039.1:chr11:72019642:-	1,15	-
chr11	134244144	134244145	ENSG00000149328.10:ENST00000535456.2:chr11:134244144:+	1,14	+
chr12	122821243	122821244	ENSG00000130779.15:ENST00000537178.1:chr12:122821243:-	1,13	-
chr1	28600607	28600608	ENSG00000130766.4:ENST00000253063.3:chr1:28600607:+	1,48	+
chr2	234429637	234429638	ENSG00000085982.9:ENST00000251722.6:chr2:234429637:-	1,3	-
chr3	15287097	15287098	ENSG00000131375.5:ENST00000253693.2:chr3:15287097:+	1,22	+
chr3	47755930	47755931	ENSG00000173473.6:ENST00000254480.5:chr3:47755930:-	1,80	-
chr3	47747985	47747986	ENSG00000173473.6:ENST00000254480.5:chr3:47747985:-	1,80	-
chr3	47702933	47702934	ENSG00000173473.6:ENST00000254480.5:chr3:47702933:-	1,91	-
chr3	125223479	125223480	ENSG00000114520.6:ENST00000251775.4:chr3:125223479:-	1,61	-
chr5	141511816	141511817	ENSG00000131507.9:ENST00000253814.4:chr5:141511816:+	1,69	+
chr7	55459577	55459578	ENSG00000132434.5:ENST00000254770.2:chr7:55459577:+	1,20	+
chr8	21844729	21844730	ENSG00000130227.12:ENST00000252512.9:chr8:21844729:+	1,28	+
chr8	21861521	21861522	ENSG00000130227.12:ENST00000252512.9:chr8:21861521:+	1,28	+
chr11	18531102	18531103	ENSG00000074319.8:ENST00000251968.3:chr11:18531102:-	1,37	-
chr11	18528462	18528463	ENSG00000074319.8:ENST00000251968.3:chr11:18528462:-	1,37	-
chr11	70200487	70200488	ENSG00000131626.11:ENST00000253925.7:chr11:70200487:+	1,9	+
chr11	93530752	93530753	ENSG00000042429.6:ENST00000251871.3:chr11:93530752:+	1,49	+
chr17	1782952	1782953	ENSG00000132383.7:ENST00000254719.5:chr17:1782952:+	1267	+
chr17	65722686	65722687	ENSG00000130935.5:ENST00000253247.4:chr17:65722686:+	1301	+
chr17	65733722	65733723	ENSG00000130935.5:ENST00000253247.4:chr17:65733722:+	1300	+
chr19	10221043	10221044	ENSG00000130810.15:ENST00000253107.7:chr19:10221043:+	1,9	+
chr19	10369159	10369160	ENSG00000105364.9:ENST00000253099.6:chr19:10369159:+	1,7	+
chr19	14627555	14627556	ENSG00000132002.3:ENST00000254322.2:chr19:14627555:-	1,84	-
chr19	14627567	14627568	ENSG00000132002.3:ENST00000254322.2:chr19:14627567:-	1,85	-
chr19	14627803	14627804	ENSG00000132002.3:ENST00000254322.2:chr19:14627803:-	1,85	-
chr19	14626861	14626862	ENSG00000132002.3:ENST00000254322.2:chr19:14626861:-	1,85	-
chr19	17692075	17692076	ENSG00000130309.6:ENST00000252599.4:chr19:17692075:+	1,32	+
chr19	39207758	39207759	ENSG00000130402.7:ENST00000252699.2:chr19:39207758:+	1,58	+
chr19	39214277	39214278	ENSG00000130402.7:ENST00000252699.2:chr19:39214277:+	1,63	+
chr19	39219963	39219964	ENSG00000130402.7:ENST00000252699.2:chr19:39219963:+	1,65	+
chr19	48954431	48954432	ENSG00000105447.8:ENST00000253237.5:chr19:48954431:+	1,61	+
chr19	48954473	48954474	ENSG00000105447.8:ENST00000253237.5:chr19:48954473:+	1,61	+
chr20	60884454	60884455	ENSG00000130702.9:ENST00000252999.3:chr20:60884454:-	1,2	-
chr22	46068021	46068022	ENSG00000130638.11:ENST00000252934.5:chr22:46068021:+	1114	+
chr22	46085615	46085616	ENSG00000130638.11:ENST00000252934.5:chr22:46085615:+	1115	+
chrX	18265933	18265934	ENSG00000102098.13:ENST00000251900.4:chrX:18265933:-	1,24	-
chrX	62885866	62885867	ENSG00000131089.9:ENST00000253401.6:chrX:62885866:-	1,1	-
chrX	117570733	117570734	ENSG00000131725.9:ENST00000254029.3:chrX:117570733:+	1,17	+
chr1	225965690	225965691	ENSG00000143742.8:ENST00000304786.7:chr1:225965690:+	1170	+
chr2	70315638	70315639	ENSG00000169564.5:ENST00000303577.5:chr2:70315638:+	1,48	+
chr5	132409716	132409717	ENSG00000170606.9:ENST00000304858.2:chr5:132409716:+	1173	+
chr5	132425288	132425289	ENSG00000170606.9:ENST00000304858.2:chr5:132425288:+	1177	+
chr5	132425324	132425325	ENSG00000170606.9:ENST00000304858.2:chr5:132425324:+	1177	+
chr5	132437556	132437557	ENSG00000170606.9:ENST00000304858.2:chr5:132437556:+	1179	+
chr5	176024180	176024181	ENSG00000169258.6:ENST00000303991.4:chr5:176024180:-	1,5	-
chr7	99696908	99696909	ENSG00000166508.13:ENST00000303887.5:chr7:99696908:-	1290	-
chr7	99693044	99693045	ENSG00000166508.13:ENST00000303887.5:chr7:99693044:-	1290	-
chr7	99691809	99691810	ENSG00000166508.13:ENST00000303887.5:chr7:99691809:-	1290	-
chr7	99690931	99690932	ENSG00000166508.13:ENST00000303887.5:chr7:99690931:-	1290	-
chr9	136905378	136905379	ENSG00000169925.12:ENST00000303407.7:chr9:136905378:-	1,29	-
chr14	50088518	50088519	ENSG00000168282.4:ENST00000305386.2:chr14:50088518:+	1,27	+
chr14	75601632	75601633	ENSG00000170348.4:ENST00000303575.4:chr14:75601632:-	1,95	-
chr15	41817322	41817323	ENSG00000103932.7:ENST00000304330.4:chr15:41817322:-	1,5	-
chr15	43622240	43622241	ENSG00000168806.6:ENST00000305641.5:chr15:43622240:-	1,25	-
chr16	46637888	46637889	ENSG00000171241.4:ENST00000303383.3:chr16:46637888:-	1,41	-
chr17	1582367	1582368	ENSG00000174231.12:ENST00000304992.6:chr17:1582367:-	1,18	-
chr17	1582484	1582485	ENSG00000174231.12:ENST00000304992.6:chr17:1582484:-	1,18	-
chrX	118723548	118723549	ENSG00000186416.8:ENST00000304449.5:chrX:118723548:-	3,3	-
chrX	118724854	118724855	ENSG00000186416.8:ENST00000304449.5:chrX:118724854:-	1,3	-
chr3	25805578	25805579	ENSG00000151092.12:ENST00000428257.1:chr3:25805578:-	1,9	-
chr3	158545075	158545076	ENSG00000118855.14:ENST00000415822.2:chr3:158545075:+	1,13	+
chr7	22999972	22999973	ENSG00000122591.7:ENST00000432176.2:chr7:22999972:-	1,21	-
chr7	22985439	22985440	ENSG00000122591.7:ENST00000432176.2:chr7:22985439:-	1,21	-
chr9	95050511	95050512	ENSG00000196305.13:ENST00000443024.2:chr9:95050511:-	1313	-
chr9	95048027	95048028	ENSG00000196305.13:ENST00000443024.2:chr9:95048027:-	1313	-
chr9	95036731	95036732	ENSG00000196305.13:ENST00000443024.2:chr9:95036731:-	1313	-
chr9	95033353	95033354	ENSG00000196305.13:ENST00000443024.2:chr9:95033353:-	1313	-
chr9	95032198	95032199	ENSG00000196305.13:ENST00000443024.2:chr9:95032198:-	1313	-
chr9	95032253	95032254	ENSG00000196305.13:ENST00000443024.2:chr9:95032253:-	1312	-
chr9	95025317	95025318	ENSG00000196305.13:ENST00000443024.2:chr9:95025317:-	1313	-
chr9	95012476	95012477	ENSG00000196305.13:ENST00000443024.2:chr9:95012476:-	1312	-
chr9	95012166	95012167	ENSG00000196305.13:ENST00000443024.2:chr9:95012166:-	1312	-
chr11	125514444	125514445	ENSG00000149554.8:ENST00000438015.1:chr11:125514444:+	1,11	+
chr13	31729679	31729680	ENSG00000120694.15:ENST00000445273.2:chr13:31729679:-	1,6	-
chr13	31728770	31728771	ENSG00000120694.15:ENST00000445273.2:chr13:31728770:-	1,6	-
chr15	41669494	41669495	ENSG00000137804.8:ENST00000414849.2:chr15:41669494:+	1,62	+
chr19	45394773	45394774	ENSG00000130204.8:ENST00000426677.2:chr19:45394773:+	1,24	+
chr1	68620903	68620904	ENSG00000116729.9:ENST00000262348.4:chr1:68620903:-	1,24	-
chr2	242203988	242203989	ENSG00000115677.12:ENST00000310931.4:chr2:242203988:-	1,57	-
chr2	242202233	242202234	ENSG00000115677.12:ENST00000310931.4:chr2:242202233:-	1,57	-
chr2	242196218	242196219	ENSG00000115677.12:ENST00000310931.4:chr2:242196218:-	1,57	-
chr2	242170318	242170319	ENSG00000115677.12:ENST00000310931.4:chr2:242170318:-	1,54	-
chr2	242169034	242169035	ENSG00000115677.12:ENST00000310931.4:chr2:242169034:-	1,54	-
chr3	10074632	10074633	ENSG00000144554.6:ENST00000287647.3:chr3:10074632:+	1,10	+
chr3	148792094	148792095	ENSG00000071794.11:ENST00000310053.5:chr3:148792094:-	1,30	-
chr5	170818310	170818311	ENSG00000181163.9:ENST00000296930.5:chr5:170818310:+	1271	+
chr5	170832339	170832340	ENSG00000181163.9:ENST00000296930.5:chr5:170832339:+	1271	+
chr7	140178972	140178973	ENSG00000133606.6:ENST00000255977.2:chr7:140178972:-	1,72	-
chr8	29924345	29924346	ENSG00000133872.9:ENST00000256255.6:chr8:29924345:-	1,87	-
chr14	96997836	96997837	ENSG00000090060.13:ENST00000216277.8:chr14:96997836:+	1243	+
chr14	96997865	96997866	ENSG00000090060.13:ENST00000216277.8:chr14:96997865:+	1243	+
chr14	97029168	97029169	ENSG00000090060.13:ENST00000216277.8:chr14:97029168:+	1259	+
chr14	97029174	97029175	ENSG00000090060.13:ENST00000216277.8:chr14:97029174:+	1259	+
chr15	66811298	66811299	ENSG00000174442.7:ENST00000307897.5:chr15:66811298:+	1106	+
chr15	66828275	66828276	ENSG00000174442.7:ENST00000307897.5:chr15:66828275:+	1106	+
chr15	66828332	66828333	ENSG00000174442.7:ENST00000307897.5:chr15:66828332:+	1106	+
chr15	66829508	66829509	ENSG00000174442.7:ENST00000307897.5:chr15:66829508:+	1106	+
chr15	66829572	66829573	ENSG00000174442.7:ENST00000307897.5:chr15:66829572:+	1106	+
chr15	89828372	89828373	ENSG00000140525.13:ENST00000310775.7:chr15:89828372:+	1,63	+
chr15	89837220	89837221	ENSG00000140525.13:ENST00000310775.7:chr15:89837220:+	1,65	+
chr17	19555880	19555881	ENSG00000072210.14:ENST00000176643.6:chr17:19555880:+	1,31	+
chr17	19555883	19555884	ENSG00000072210.14:ENST00000176643.6:chr17:19555883:+	1,31	+
chr19	9929444	9929445	ENSG00000127452.4:ENST00000247977.4:chr19:9929444:-	1,6	-
chr1	27057993	27057994	ENSG00000117713.13:ENST00000324856.7:chr1:27057993:+	1,1	+
chr1	27100177	27100178	ENSG00000117713.13:ENST00000324856.7:chr1:27100177:+	1,5	+
chr1	224371094	224371095	ENSG00000143753.8:ENST00000323699.4:chr1:224371094:+	1155	+
chr1	224377310	224377311	ENSG00000143753.8:ENST00000323699.4:chr1:224377310:+	1155	+
chr1	224377708	224377709	ENSG00000143753.8:ENST00000323699.4:chr1:224377708:+	1155	+
chr1	224380066	224380067	ENSG00000143753.8:ENST00000323699.4:chr1:224380066:+	1155	+
chr2	27907961	27907962	ENSG00000163798.9:ENST00000326019.6:chr2:27907961:+	1,72	+
chr2	96943419	96943420	ENSG00000144028.10:ENST00000323853.5:chr2:96943419:-	1,88	-
chr2	96943447	96943448	ENSG00000144028.10:ENST00000323853.5:chr2:96943447:-	1,88	-
chr5	61770251	61770252	ENSG00000086200.12:ENST00000325324.6:chr5:61770251:+	1,63	+
chr5	61778938	61778939	ENSG00000086200.12:ENST00000325324.6:chr5:61778938:+	1,63	+
chr7	5944825	5944826	ENSG00000122674.8:ENST00000325974.6:chr7:5944825:+	1,72	+
chr7	140069458	140069459	ENSG00000157800.13:ENST00000326232.9:chr7:140069458:-	1,26	-
chr7	148464833	148464834	ENSG00000055130.11:ENST00000325222.4:chr7:148464833:+	1143	+
chr7	148489844	148489845	ENSG00000055130.11:ENST00000325222.4:chr7:148489844:+	1143	+
chr7	148497664	148497665	ENSG00000055130.11:ENST00000325222.4:chr7:148497664:+	1141	+
chr8	17872135	17872136	ENSG00000078674.13:ENST00000325083.8:chr8:17872135:+	1,9	+
chr9	111775708	111775709	ENSG00000119326.10:ENST00000325551.4:chr9:111775708:-	1,60	-
chr9	128003088	128003089	ENSG00000044574.7:ENST00000324460.6:chr9:128003088:-	1476	-
chr9	127999231	127999232	ENSG00000044574.7:ENST00000324460.6:chr9:127999231:-	1483	-
chr9	127999373	127999374	ENSG00000044574.7:ENST00000324460.6:chr9:127999373:-	1486	-
chr9	139837109	139837110	ENSG00000159069.9:ENST00000325285.3:chr9:139837109:-	1,6	-
chr9	140069409	140069410	ENSG00000176248.7:ENST00000323927.2:chr9:140069409:-	1,9	-
chr11	94180573	94180574	ENSG00000020922.8:ENST00000323929.3:chr11:94180573:-	1,14	-
chr14	23396779	23396780	ENSG00000100462.11:ENST00000324366.8:chr14:23396779:-	1140	-
chr14	23395754	23395755	ENSG00000100462.11:ENST00000324366.8:chr14:23395754:-	1140	-
chr14	23394129	23394130	ENSG00000100462.11:ENST00000324366.8:chr14:23394129:-	1140	-
chr14	23394131	23394132	ENSG00000100462.11:ENST00000324366.8:chr14:23394131:-	1140	-
chr14	23393343	23393344	ENSG00000100462.11:ENST00000324366.8:chr14:23393343:-	1140	-
chr14	23391697	23391698	ENSG00000100462.11:ENST00000324366.8:chr14:23391697:-	1140	-
chr14	23391396	23391397	ENSG00000100462.11:ENST00000324366.8:chr14:23391396:-	1140	-
chr19	17838528	17838529	ENSG00000130479.6:ENST00000324096.4:chr19:17838528:+	1,14	+
chr22	39907383	39907384	ENSG00000100335.8:ENST00000325301.2:chr22:39907383:+	1,56	+
chr22	39907966	39907967	ENSG00000100335.8:ENST00000325301.2:chr22:39907966:+	1,56	+
chr22	39907990	39907991	ENSG00000100335.8:ENST00000325301.2:chr22:39907990:+	1,56	+
chr22	39909545	39909546	ENSG00000100335.8:ENST00000325301.2:chr22:39909545:+	1,57	+
chr22	39909799	39909800	ENSG00000100335.8:ENST00000325301.2:chr22:39909799:+	1,57	+
chr1	10477506	10477507	ENSG00000142657.16:ENST00000270776.8:chr1:10477506:+	1,40	+
chr1	156737778	156737779	ENSG00000143294.10:ENST00000271526.4:chr1:156737778:+	1,32	+
chr1	156756526	156756527	ENSG00000143294.10:ENST00000271526.4:chr1:156756526:+	1,33	+
chr2	63664590	63664591	ENSG00000143951.11:ENST00000272321.7:chr2:63664590:-	1,4	-
chr2	219266870	219266871	ENSG00000144579.3:ENST00000273062.2:chr2:219266870:+	1,10	+
chr3	32578526	32578527	ENSG00000144635.4:ENST00000273130.4:chr3:32578526:-	1,42	-
chr3	69151175	69151176	ENSG00000144746.6:ENST00000273258.3:chr3:69151175:+	1,50	+
chr3	101540368	101540369	ENSG00000144815.10:ENST00000273347.5:chr3:101540368:+	1,20	+
chr3	101540783	101540784	ENSG00000144815.10:ENST00000273347.5:chr3:101540783:+	1,20	+
chr3	183856021	183856022	ENSG00000145191.7:ENST00000273783.3:chr3:183856021:+	1,38	+
chr4	89444830	89444831	ENSG00000145337.4:ENST00000273968.4:chr4:89444830:-	1,51	-
chr4	122744667	122744668	ENSG00000145386.5:ENST00000274026.5:chr4:122744667:-	1148	-
chr4	122743739	122743740	ENSG00000145386.5:ENST00000274026.5:chr4:122743739:-	1151	-
chr4	128804498	128804499	ENSG00000142731.6:ENST00000270861.5:chr4:128804498:+	1,31	+
chr5	36177392	36177393	ENSG00000145604.11:ENST00000274255.6:chr5:36177392:+	1,54	+
chr1	31465438	31465439	ENSG00000134644.11:ENST00000257075.5:chr1:31465438:-	1,29	-
chr1	115282463	115282464	ENSG00000009307.11:ENST00000261443.5:chr1:115282463:-	1,50	-
chr1	115276405	115276406	ENSG00000009307.11:ENST00000261443.5:chr1:115276405:-	1,50	-
chr1	115275282	115275283	ENSG00000009307.11:ENST00000261443.5:chr1:115275282:-	1,50	-
chr1	115273129	115273130	ENSG00000009307.11:ENST00000261443.5:chr1:115273129:-	1,50	-
chr1	146726592	146726593	ENSG00000131778.13:ENST00000369258.4:chr1:146726592:+	2,60	+
chr1	146766161	146766162	ENSG00000131778.13:ENST00000369258.4:chr1:146766161:+	1,59	+
chr1	207925649	207925650	ENSG00000117335.14:ENST00000367042.1:chr1:207925649:+	1,8	+
chr2	242277174	242277175	ENSG00000168385.13:ENST00000391971.2:chr2:242277174:+	1255	+
chr3	184040468	184040469	ENSG00000114867.15:ENST00000392537.2:chr3:184040468:+	1,7	+
chr7	102715784	102715785	ENSG00000170632.9:ENST00000541300.1:chr7:102715784:+	1,1	+
chr11	64536798	64536799	ENSG00000168066.16:ENST00000227503.9:chr11:64536798:-	1,25	-
chr11	65302706	65302707	ENSG00000142186.12:ENST00000420247.2:chr11:65302706:+	1,12	+
chr14	21679619	21679620	ENSG00000092199.13:ENST00000554455.1:chr14:21679619:-	1101	-
chr19	41782130	41782131	ENSG00000105323.12:ENST00000392006.3:chr19:41782130:+	1,55	+
chr19	41808705	41808706	ENSG00000105323.12:ENST00000392006.3:chr19:41808705:+	1,55	+
chr19	41808729	41808730	ENSG00000105323.12:ENST00000392006.3:chr19:41808729:+	1,55	+
chr21	38523125	38523126	ENSG00000182670.9:ENST00000540756.1:chr21:38523125:+	1,9	+
chr21	48063455	48063456	ENSG00000160310.12:ENST00000440086.1:chr21:48063455:+	1,1	+
chr9	36665362	36665363	ENSG00000165304.3:ENST00000543751.1:chr9:36665362:+	1,17	+
chr10	34688286	34688287	ENSG00000148498.11:ENST00000545693.1:chr10:34688286:-	1,1	-
chr16	2314202	2314203	ENSG00000205937.7:ENST00000566458.1:chr16:2314202:-	1,27	-
chr16	50813844	50813845	ENSG00000083799.13:ENST00000569418.1:chr16:50813844:+	1,1	+
chr16	89825092	89825093	ENSG00000187741.10:ENST00000568369.1:chr16:89825092:-	1,3	-
chr17	16089873	16089874	ENSG00000141027.16:ENST00000582357.1:chr17:16089873:-	1,9	-
chr17	34171108	34171109	ENSG00000172660.7:ENST00000588240.1:chr17:34171108:+	1,13	+
chr17	62290841	62290842	ENSG00000136478.3:ENST00000584379.1:chr17:62290841:-	1,9	-
chr17	62230319	62230320	ENSG00000136478.3:ENST00000584379.1:chr17:62230319:-	1,9	-
chr1	53726194	53726195	ENSG00000157193.10:ENST00000306052.6:chr1:53726194:-	1,2	-
chr1	99225633	99225634	ENSG00000162627.12:ENST00000306121.3:chr1:99225633:+	1,24	+
chr1	228676707	228676708	ENSG00000168159.9:ENST00000305943.7:chr1:228676707:+	1101	+
chr2	29083986	29083987	ENSG00000171103.6:ENST00000306108.5:chr2:29083986:-	6,24	-
chr2	85766430	85766431	ENSG00000168906.8:ENST00000306434.3:chr2:85766430:+	1,98	+
chr2	85769761	85769762	ENSG00000168906.8:ENST00000306434.3:chr2:85769761:+	1100	+
chr4	144127281	144127282	ENSG00000170185.5:ENST00000307017.4:chr4:144127281:+	1,28	+
chr4	169911379	169911380	ENSG00000145439.7:ENST00000306193.3:chr4:169911379:-	1,11	-
chr5	122754198	122754199	ENSG00000168944.11:ENST00000306467.5:chr5:122754198:-	1,1	-
chr7	6175484	6175485	ENSG00000106346.7:ENST00000306177.5:chr7:6175484:+	1,4	+
chr8	95897309	95897310	ENSG00000175305.12:ENST00000308108.4:chr8:95897309:-	1,22	-
chr8	95893907	95893908	ENSG00000175305.12:ENST00000308108.4:chr8:95893907:-	1,22	-
chr8	145487821	145487822	ENSG00000170727.7:ENST00000307404.5:chr8:145487821:-	1,43	-
chr8	145486932	145486933	ENSG00000170727.7:ENST00000307404.5:chr8:145486932:-	1,43	-
chr8	145486128	145486129	ENSG00000170727.7:ENST00000307404.5:chr8:145486128:-	1,43	-
chr10	74034486	74034487	ENSG00000168209.4:ENST00000307365.3:chr10:74034486:+	1,50	+
chr10	74034685	74034686	ENSG00000168209.4:ENST00000307365.3:chr10:74034685:+	1,51	+
chr11	61562875	61562876	ENSG00000168496.3:ENST00000305885.2:chr11:61562875:+	1150	+
chr11	61563284	61563285	ENSG00000168496.3:ENST00000305885.2:chr11:61563284:+	1150	+
chr11	65628239	65628240	ENSG00000172732.7:ENST00000308110.4:chr11:65628239:+	1,10	+
chr12	49229919	49229920	ENSG00000174243.5:ENST00000308025.3:chr12:49229919:-	1,69	-
chr14	36221287	36221288	ENSG00000174373.11:ENST00000307138.6:chr14:36221287:-	2,5	-
chr15	66781553	66781554	ENSG00000169032.5:ENST00000307102.5:chr15:66781553:+	1,75	+
chr15	75798136	75798137	ENSG00000169410.5:ENST00000306726.2:chr15:75798136:-	1,22	-
chr15	75798313	75798314	ENSG00000169410.5:ENST00000306726.2:chr15:75798313:-	1,22	-
chr17	74057587	74057588	ENSG00000167881.10:ENST00000307877.2:chr17:74057587:-	1122	-
chr17	74056406	74056407	ENSG00000167881.10:ENST00000307877.2:chr17:74056406:-	1122	-
chr17	74035900	74035901	ENSG00000167881.10:ENST00000307877.2:chr17:74035900:-	1122	-
chr17	74035944	74035945	ENSG00000167881.10:ENST00000307877.2:chr17:74035944:-	1122	-
chr17	80040206	80040207	ENSG00000169710.6:ENST00000306749.2:chr17:80040206:-	1,17	-
chr19	2790436	2790437	ENSG00000172009.10:ENST00000307741.6:chr19:2790436:+	1,65	+
chr19	2808260	2808261	ENSG00000172009.10:ENST00000307741.6:chr19:2808260:+	4,67	+
chr19	2810440	2810441	ENSG00000172009.10:ENST00000307741.6:chr19:2810440:+	1,67	+
chr19	2810441	2810442	ENSG00000172009.10:ENST00000307741.6:chr19:2810441:+	1,67	+
chr19	2810653	2810654	ENSG00000172009.10:ENST00000307741.6:chr19:2810653:+	1,66	+
chr19	33117693	33117694	ENSG00000105186.10:ENST00000306065.4:chr19:33117693:-	1,23	-
chr1	153642675	153642676	ENSG00000143621.12:ENST00000361891.4:chr1:153642675:-	2117	-
chr1	153640998	153640999	ENSG00000143621.12:ENST00000361891.4:chr1:153640998:-	1117	-
chr1	153640539	153640540	ENSG00000143621.12:ENST00000361891.4:chr1:153640539:-	1117	-
chr1	156236433	156236434	ENSG00000198952.7:ENST00000361813.5:chr1:156236433:-	1,62	-
chr1	156236034	156236035	ENSG00000198952.7:ENST00000361813.5:chr1:156236034:-	1,62	-
chr1	156230324	156230325	ENSG00000198952.7:ENST00000361813.5:chr1:156230324:-	1,68	-
chr1	173810100	173810101	ENSG00000117593.8:ENST00000361951.4:chr1:173810100:+	1,76	+
chr1	184006291	184006292	ENSG00000198756.6:ENST00000361927.4:chr1:184006291:-	1,6	-
chr1	225718315	225718316	ENSG00000154380.12:ENST00000366843.2:chr1:225718315:-	1,2	-
chr1	226589976	226589977	ENSG00000143799.8:ENST00000366794.5:chr1:226589976:-	1799	-
chr1	226578146	226578147	ENSG00000143799.8:ENST00000366794.5:chr1:226578146:-	1816	-
chr1	226578168	226578169	ENSG00000143799.8:ENST00000366794.5:chr1:226578168:-	1813	-
chr1	226578210	226578211	ENSG00000143799.8:ENST00000366794.5:chr1:226578210:-	1810	-
chr1	226573338	226573339	ENSG00000143799.8:ENST00000366794.5:chr1:226573338:-	1828	-
chr1	226570812	226570813	ENSG00000143799.8:ENST00000366794.5:chr1:226570812:-	1835	-
chr1	226568791	226568792	ENSG00000143799.8:ENST00000366794.5:chr1:226568791:-	1841	-
chr1	226567768	226567769	ENSG00000143799.8:ENST00000366794.5:chr1:226567768:-	1845	-
chr1	226567818	226567819	ENSG00000143799.8:ENST00000366794.5:chr1:226567818:-	1842	-
chr1	226567290	226567291	ENSG00000143799.8:ENST00000366794.5:chr1:226567290:-	1817	-
chr1	226566904	226566905	ENSG00000143799.8:ENST00000366794.5:chr1:226566904:-	1817	-
chr1	226564968	226564969	ENSG00000143799.8:ENST00000366794.5:chr1:226564968:-	1819	-
chr1	226558162	226558163	ENSG00000143799.8:ENST00000366794.5:chr1:226558162:-	1824	-
chr1	226558211	226558212	ENSG00000143799.8:ENST00000366794.5:chr1:226558211:-	1822	-
chr1	226555923	226555924	ENSG00000143799.8:ENST00000366794.5:chr1:226555923:-	1824	-
chr1	226555306	226555307	ENSG00000143799.8:ENST00000366794.5:chr1:226555306:-	1821	-
chr1	226552769	226552770	ENSG00000143799.8:ENST00000366794.5:chr1:226552769:-	1826	-
chr1	226551655	226551656	ENSG00000143799.8:ENST00000366794.5:chr1:226551655:-	1828	-
chr1	226549759	226549760	ENSG00000143799.8:ENST00000366794.5:chr1:226549759:-	1828	-
chr1	226549168	226549169	ENSG00000143799.8:ENST00000366794.5:chr1:226549168:-	1826	-
chr1	227169754	227169755	ENSG00000163050.12:ENST00000366777.3:chr1:227169754:+	1,53	+
chr1	227171893	227171894	ENSG00000163050.12:ENST00000366777.3:chr1:227171893:+	1,53	+
chr1	230391028	230391029	ENSG00000143641.8:ENST00000366672.4:chr1:230391028:+	1,38	+
chr1	231064733	231064734	ENSG00000143643.8:ENST00000366661.4:chr1:231064733:-	1,14	-
chr1	231386799	231386800	ENSG00000116906.7:ENST00000366647.4:chr1:231386799:+	1129	+
chr1	233464450	233464451	ENSG00000143674.6:ENST00000366624.3:chr1:233464450:+	1,17	+
chr1	236201545	236201546	ENSG00000116962.10:ENST00000366595.3:chr1:236201545:-	1,2	-
chr1	236749197	236749198	ENSG00000119285.6:ENST00000366582.3:chr1:236749197:-	1,67	-
chr1	247076619	247076620	ENSG00000153207.10:ENST00000366508.1:chr1:247076619:-	1,1	-
chr10	112364013	112364014	ENSG00000108055.9:ENST00000361804.4:chr10:112364013:+	1,82	+
chr12	2973890	2973891	ENSG00000111206.8:ENST00000361953.3:chr12:2973890:-	1,8	-
chr12	2968022	2968023	ENSG00000111206.8:ENST00000361953.3:chr12:2968022:-	1,8	-
chr14	35032371	35032372	ENSG00000129515.14:ENST00000362031.4:chr14:35032371:-	1,46	-
chr17	45786778	45786779	ENSG00000198933.5:ENST00000361722.3:chr17:45786778:+	1,1	+
chr19	57910956	57910957	ENSG00000188785.7:ENST00000366197.5:chr19:57910956:+	1,2	+
chr21	47409041	47409042	ENSG00000142156.10:ENST00000361866.3:chr21:47409041:+	1,11	+
chr22	38643945	38643946	ENSG00000198792.8:ENST00000361906.3:chr22:38643945:-	1,16	-
chr22	38620898	38620899	ENSG00000198792.8:ENST00000361906.3:chr22:38620898:-	1,17	-
chr1	11850946	11850947	ENSG00000177000.6:ENST00000376590.3:chr1:11850946:-	1,1	-
chr1	15871013	15871014	ENSG00000116138.8:ENST00000375847.3:chr1:15871013:+	1,3	+
chr1	16268909	16268910	ENSG00000116809.7:ENST00000375743.4:chr1:16268909:-	1,2	-
chr2	118703128	118703129	ENSG00000125633.6:ENST00000376300.2:chr2:118703128:-	1,12	-
chr6	31129484	31129485	ENSG00000137310.7:ENST00000376255.4:chr6:31129484:+	1,20	+
chr9	82323661	82323662	ENSG00000106829.14:ENST00000376552.2:chr9:82323661:+	1,8	+
chr9	85677644	85677645	ENSG00000165105.9:ENST00000376447.3:chr9:85677644:-	1,11	-
chr9	91077519	91077520	ENSG00000106723.12:ENST00000375859.3:chr9:91077519:+	1,40	+
chr9	95477671	95477672	ENSG00000185963.9:ENST00000375512.3:chr9:95477671:-	1,20	-
chr10	22615488	22615489	ENSG00000168283.9:ENST00000376663.3:chr10:22615488:+	1,56	+
chr10	22618216	22618217	ENSG00000168283.9:ENST00000376663.3:chr10:22618216:+	1,63	+
chr13	100204517	100204518	ENSG00000125304.8:ENST00000376387.4:chr13:100204517:+	1,59	+
chr20	30914577	30914578	ENSG00000101350.6:ENST00000375712.3:chr20:30914577:+	1,20	+
chr20	30914599	30914600	ENSG00000101350.6:ENST00000375712.3:chr20:30914599:+	1,20	+
chr20	31434438	31434439	ENSG00000101367.8:ENST00000375571.5:chr20:31434438:+	1242	+
chrX	48844220	48844221	ENSG00000068400.9:ENST00000376441.1:chrX:48844220:-	1,11	-
chr1	16774449	16774450	ENSG00000157191.15:ENST00000337132.5:chr1:16774449:+	1,23	+
chr2	27009145	27009146	ENSG00000115163.10:ENST00000335756.4:chr2:27009145:+	1,8	+
chr2	86434404	86434405	ENSG00000132313.10:ENST00000337109.4:chr2:86434404:+	1,30	+
chr2	198274630	198274631	ENSG00000115524.11:ENST00000335508.6:chr2:198274630:-	1202	-
chr2	198273202	198273203	ENSG00000115524.11:ENST00000335508.6:chr2:198273202:-	1207	-
chr2	198272765	198272766	ENSG00000115524.11:ENST00000335508.6:chr2:198272765:-	1208	-
chr2	198267513	198267514	ENSG00000115524.11:ENST00000335508.6:chr2:198267513:-	1201	-
chr2	198266180	198266181	ENSG00000115524.11:ENST00000335508.6:chr2:198266180:-	1202	-
chr6	131222273	131222274	ENSG00000079819.12:ENST00000337057.3:chr6:131222273:-	1,30	-
chr8	98725929	98725930	ENSG00000147649.5:ENST00000336273.3:chr8:98725929:+	2,62	+
chr8	103840836	103840837	ENSG00000155096.9:ENST00000337198.5:chr8:103840836:-	1,90	-
chr10	105768093	105768094	ENSG00000065613.9:ENST00000335753.4:chr10:105768093:+	1,1	+
chr11	18637045	18637046	ENSG00000179119.10:ENST00000336349.5:chr11:18637045:-	1,14	-
chr12	49523424	49523425	ENSG00000123416.11:ENST00000336023.5:chr12:49523424:-	1626	-
chr12	49521928	49521929	ENSG00000123416.11:ENST00000336023.5:chr12:49521928:-	1628	-
chr12	49521947	49521948	ENSG00000123416.11:ENST00000336023.5:chr12:49521947:-	4628	-
chr12	49521956	49521957	ENSG00000123416.11:ENST00000336023.5:chr12:49521956:-	4629	-
chr12	49522014	49522015	ENSG00000123416.11:ENST00000336023.5:chr12:49522014:-	1628	-
chr12	49522098	49522099	ENSG00000123416.11:ENST00000336023.5:chr12:49522098:-	1629	-
chr12	49522195	49522196	ENSG00000123416.11:ENST00000336023.5:chr12:49522195:-	1626	-
chr12	49522204	49522205	ENSG00000123416.11:ENST00000336023.5:chr12:49522204:-	1629	-
chr12	49522278	49522279	ENSG00000123416.11:ENST00000336023.5:chr12:49522278:-	1629	-
chr12	49522298	49522299	ENSG00000123416.11:ENST00000336023.5:chr12:49522298:-	1628	-
chr12	49522300	49522301	ENSG00000123416.11:ENST00000336023.5:chr12:49522300:-	1627	-
chr12	49522301	49522302	ENSG00000123416.11:ENST00000336023.5:chr12:49522301:-	1629	-
chr12	49522418	49522419	ENSG00000123416.11:ENST00000336023.5:chr12:49522418:-	1629	-
chr12	49522422	49522423	ENSG00000123416.11:ENST00000336023.5:chr12:49522422:-	1628	-
chr12	49522424	49522425	ENSG00000123416.11:ENST00000336023.5:chr12:49522424:-	2629	-
chr12	49522472	49522473	ENSG00000123416.11:ENST00000336023.5:chr12:49522472:-	1628	-
chr12	49522694	49522695	ENSG00000123416.11:ENST00000336023.5:chr12:49522694:-	1627	-
chr12	52470737	52470738	ENSG00000123395.10:ENST00000336854.4:chr12:52470737:+	1,1	+
chr14	105478169	105478170	ENSG00000170779.10:ENST00000336219.3:chr14:105478169:-	1,19	-
chr17	72999739	72999740	ENSG00000109089.7:ENST00000337231.5:chr17:72999739:+	1,4	+
chr22	17640079	17640080	ENSG00000069998.8:ENST00000336737.4:chr22:17640079:-	1,21	-
chr22	17630551	17630552	ENSG00000069998.8:ENST00000336737.4:chr22:17630551:-	1,21	-
chr22	28292587	28292588	ENSG00000180957.13:ENST00000335272.5:chr22:28292587:-	1134	-
chr1	234563132	234563133	ENSG00000059588.5:ENST00000040877.1:chr1:234563132:-	1,17	-
chr3	12611637	12611638	ENSG00000075975.11:ENST00000170447.7:chr3:12611637:+	1,90	+
chr3	12611643	12611644	ENSG00000075975.11:ENST00000170447.7:chr3:12611643:+	1,90	+
chr5	908534	908535	ENSG00000071539.9:ENST00000166345.3:chr5:908534:+	1,84	+
chr5	916084	916085	ENSG00000071539.9:ENST00000166345.3:chr5:916084:+	2,84	+
chr5	916085	916086	ENSG00000071539.9:ENST00000166345.3:chr5:916085:+	2,84	+
chr5	112903538	112903539	ENSG00000047188.11:ENST00000161863.4:chr5:112903538:+	1,17	+
chr5	177034347	177034348	ENSG00000027847.9:ENST00000029410.5:chr5:177034347:+	1,4	+
chr6	117892023	117892024	ENSG00000047932.9:ENST00000052569.6:chr6:117892023:-	1,32	-
chr6	143823567	143823568	ENSG00000001036.9:ENST00000002165.6:chr6:143823567:-	1,45	-
chr6	143816958	143816959	ENSG00000001036.9:ENST00000002165.6:chr6:143816958:-	1,45	-
chr7	73646500	73646501	ENSG00000049541.6:ENST00000055077.3:chr7:73646500:-	1,17	-
chr7	150932547	150932548	ENSG00000033100.10:ENST00000035307.2:chr7:150932547:+	1,18	+
chr7	150934783	150934784	ENSG00000033100.10:ENST00000035307.2:chr7:150934783:+	1,18	+
chr12	2904394	2904395	ENSG00000004478.5:ENST00000001008.4:chr12:2904394:+	1110	+
chr12	9096420	9096421	ENSG00000003056.3:ENST00000000412.3:chr12:9096420:-	1,34	-
chr12	27863794	27863795	ENSG00000061794.8:ENST00000081029.3:chr12:27863794:+	1,30	+
chr12	27869224	27869225	ENSG00000061794.8:ENST00000081029.3:chr12:27869224:+	1,30	+
chr12	107486645	107486646	ENSG00000008405.7:ENST00000008527.5:chr12:107486645:-	1,74	-
chr12	107393555	107393556	ENSG00000008405.7:ENST00000008527.5:chr12:107393555:-	1,75	-
chr14	69445712	69445713	ENSG00000072110.9:ENST00000193403.6:chr14:69445712:-	1,66	-
chr15	35193029	35193030	ENSG00000021776.6:ENST00000156471.5:chr15:35193029:-	1,48	-
chr15	35193039	35193040	ENSG00000021776.6:ENST00000156471.5:chr15:35193039:-	1,48	-
chr15	35174829	35174830	ENSG00000021776.6:ENST00000156471.5:chr15:35174829:-	1,47	-
chr15	35155074	35155075	ENSG00000021776.6:ENST00000156471.5:chr15:35155074:-	1,49	-
chr16	29808269	29808270	ENSG00000079616.8:ENST00000160827.4:chr16:29808269:+	1,68	+
chr16	29808341	29808342	ENSG00000079616.8:ENST00000160827.4:chr16:29808341:+	1,69	+
chr16	29810637	29810638	ENSG00000079616.8:ENST00000160827.4:chr16:29810637:+	1,67	+
chr16	29810689	29810690	ENSG00000079616.8:ENST00000160827.4:chr16:29810689:+	1,69	+
chr17	7133616	7133617	ENSG00000004975.7:ENST00000005340.5:chr17:7133616:-	1,20	-
chr17	42426912	42426913	ENSG00000030582.12:ENST00000053867.3:chr17:42426912:+	1,39	+
chr17	42429517	42429518	ENSG00000030582.12:ENST00000053867.3:chr17:42429517:+	1,39	+
chr17	58156157	58156158	ENSG00000068097.10:ENST00000184956.6:chr17:58156157:-	1,6	-
chr19	19232404	19232405	ENSG00000064545.10:ENST00000162044.9:chr19:19232404:-	1,14	-
chr1	894612	894613	ENSG00000188976.6:ENST00000327044.6:chr1:894612:-	1,89	-
chr1	889424	889425	ENSG00000188976.6:ENST00000327044.6:chr1:889424:-	1,93	-
chr1	883524	883525	ENSG00000188976.6:ENST00000327044.6:chr1:883524:-	1,94	-
chr1	35944725	35944726	ENSG00000142687.13:ENST00000325722.3:chr1:35944725:-	1,22	-
chr3	32800987	32800988	ENSG00000182973.14:ENST00000328834.5:chr3:32800987:+	1,36	+
chr4	10444747	10444748	ENSG00000178163.3:ENST00000326756.3:chr4:10444747:-	1,7	-
chr4	141313816	141313817	ENSG00000153132.8:ENST00000325617.5:chr4:141313816:-	1,23	-
chr7	74489260	74489261	ENSG00000174374.9:ENST00000329959.4:chr7:74489260:-	1,34	-
chr8	25325920	25325921	ENSG00000184661.9:ENST00000330560.3:chr8:25325920:+	1,36	+
chr8	101541970	101541971	ENSG00000186106.7:ENST00000335659.3:chr8:101541970:-	1,33	-
chr10	73051447	73051448	ENSG00000107731.8:ENST00000335350.6:chr10:73051447:+	1,4	+
chr14	105617042	105617043	ENSG00000184916.4:ENST00000331782.3:chr14:105617042:-	1,2	-
chr15	77770669	77770670	ENSG00000140382.10:ENST00000336216.4:chr15:77770669:+	1,69	+
chr17	7213021	7213022	ENSG00000132507.13:ENST00000336458.8:chr17:7213021:+	1,40	+
chr19	8548080	8548081	ENSG00000099783.7:ENST00000325495.4:chr19:8548080:+	1106	+
chr19	8550902	8550903	ENSG00000099783.7:ENST00000325495.4:chr19:8550902:+	1106	+
chr19	8551222	8551223	ENSG00000099783.7:ENST00000325495.4:chr19:8551222:+	1106	+
chr19	17449464	17449465	ENSG00000130299.12:ENST00000324894.8:chr19:17449464:+	1,18	+
chr19	17452380	17452381	ENSG00000130299.12:ENST00000324894.8:chr19:17452380:+	1,19	+
chrX	51638220	51638221	ENSG00000179222.13:ENST00000326587.7:chrX:51638220:+	1285	+
chrX	51638665	51638666	ENSG00000179222.13:ENST00000326587.7:chrX:51638665:+	1286	+
chrX	51638719	51638720	ENSG00000179222.13:ENST00000326587.7:chrX:51638719:+	1286	+
chrX	51640026	51640027	ENSG00000179222.13:ENST00000326587.7:chrX:51640026:+	1286	+
chr1	8934895	8934896	ENSG00000074800.9:ENST00000234590.4:chr1:8934895:-	1822	-
chr1	8934922	8934923	ENSG00000074800.9:ENST00000234590.4:chr1:8934922:-	1821	-
chr1	8931985	8931986	ENSG00000074800.9:ENST00000234590.4:chr1:8931985:-	1825	-
chr1	8932040	8932041	ENSG00000074800.9:ENST00000234590.4:chr1:8932040:-	1823	-
chr1	8930529	8930530	ENSG00000074800.9:ENST00000234590.4:chr1:8930529:-	1825	-
chr1	8927231	8927232	ENSG00000074800.9:ENST00000234590.4:chr1:8927231:-	1823	-
chr1	8927251	8927252	ENSG00000074800.9:ENST00000234590.4:chr1:8927251:-	1825	-
chr1	8927273	8927274	ENSG00000074800.9:ENST00000234590.4:chr1:8927273:-	1824	-
chr1	8927275	8927276	ENSG00000074800.9:ENST00000234590.4:chr1:8927275:-	1825	-
chr1	8926352	8926353	ENSG00000074800.9:ENST00000234590.4:chr1:8926352:-	1825	-
chr1	8926416	8926417	ENSG00000074800.9:ENST00000234590.4:chr1:8926416:-	1825	-
chr1	8926521	8926522	ENSG00000074800.9:ENST00000234590.4:chr1:8926521:-	1825	-
chr1	8924009	8924010	ENSG00000074800.9:ENST00000234590.4:chr1:8924009:-	1825	-
chr1	8924131	8924132	ENSG00000074800.9:ENST00000234590.4:chr1:8924131:-	3823	-
chr1	8923332	8923333	ENSG00000074800.9:ENST00000234590.4:chr1:8923332:-	1825	-
chr1	8923388	8923389	ENSG00000074800.9:ENST00000234590.4:chr1:8923388:-	1821	-
chr1	8922971	8922972	ENSG00000074800.9:ENST00000234590.4:chr1:8922971:-	1825	-
chr2	74719821	74719822	ENSG00000115282.15:ENST00000233623.5:chr2:74719821:+	1,10	+
chr2	207018375	207018376	ENSG00000023228.9:ENST00000233190.6:chr2:207018375:-	1107	-
chr2	206992596	206992597	ENSG00000023228.9:ENST00000233190.6:chr2:206992596:-	1109	-
chr2	242072319	242072320	ENSG00000115687.9:ENST00000234040.4:chr2:242072319:-	1,9	-
chr4	57216173	57216174	ENSG00000157426.9:ENST00000205214.6:chr4:57216173:-	1,9	-
chr5	137354776	137354777	ENSG00000031003.6:ENST00000033079.3:chr5:137354776:-	1,1	-
chr6	17539535	17539536	ENSG00000112186.7:ENST00000229922.2:chr6:17539535:+	1,8	+
chr7	107542777	107542778	ENSG00000091140.8:ENST00000205402.5:chr7:107542777:+	1210	+
chr7	107546790	107546791	ENSG00000091140.8:ENST00000205402.5:chr7:107546790:+	1214	+
chr7	107559697	107559698	ENSG00000091140.8:ENST00000205402.5:chr7:107559697:+	1216	+
chr8	11683568	11683569	ENSG00000079459.8:ENST00000220584.4:chr8:11683568:+	1,69	+
chr8	42048919	42048920	ENSG00000104368.13:ENST00000220809.4:chr8:42048919:-	1,33	-
chr8	42040350	42040351	ENSG00000104368.13:ENST00000220809.4:chr8:42040350:-	1,33	-
chr8	42037512	42037513	ENSG00000104368.13:ENST00000220809.4:chr8:42037512:-	1,33	-
chr12	6646919	6646920	ENSG00000111640.10:ENST00000229239.5:chr12:6646919:+	2,84	+
chr12	6647151	6647152	ENSG00000111640.10:ENST00000229239.5:chr12:6647151:+	1,86	+
chr14	21837437	21837438	ENSG00000092201.5:ENST00000216297.2:chr14:21837437:-	1174	-
chr14	21830396	21830397	ENSG00000092201.5:ENST00000216297.2:chr14:21830396:-	1166	-
chr14	21826550	21826551	ENSG00000092201.5:ENST00000216297.2:chr14:21826550:-	2169	-
chr14	64894115	64894116	ENSG00000100714.11:ENST00000216605.8:chr14:64894115:+	1277	+
chr14	64894161	64894162	ENSG00000100714.11:ENST00000216605.8:chr14:64894161:+	1277	+
chr14	64906889	64906890	ENSG00000100714.11:ENST00000216605.8:chr14:64906889:+	1280	+
chr14	64906965	64906966	ENSG00000100714.11:ENST00000216605.8:chr14:64906965:+	1280	+
chr14	64909113	64909114	ENSG00000100714.11:ENST00000216605.8:chr14:64909113:+	1279	+
chr14	64920559	64920560	ENSG00000100714.11:ENST00000216605.8:chr14:64920559:+	1280	+
chr14	64924949	64924950	ENSG00000100714.11:ENST00000216605.8:chr14:64924949:+	1280	+
chr14	64924951	64924952	ENSG00000100714.11:ENST00000216605.8:chr14:64924951:+	1278	+
chr14	93273254	93273255	ENSG00000066455.8:ENST00000163416.2:chr14:93273254:+	1,25	+
chr16	58705080	58705081	ENSG00000103042.4:ENST00000219320.4:chr16:58705080:-	1,9	-
chr17	45234621	45234622	ENSG00000004897.7:ENST00000066544.3:chr17:45234621:-	1,45	-
chr17	45229178	45229179	ENSG00000004897.7:ENST00000066544.3:chr17:45229178:-	1,47	-
chr17	45219295	45219296	ENSG00000004897.7:ENST00000066544.3:chr17:45219295:-	1,41	-
chr17	48433447	48433448	ENSG00000015532.5:ENST00000017003.2:chr17:48433447:+	1,8	+
chr19	14676568	14676569	ENSG00000099797.7:ENST00000215567.5:chr19:14676568:+	3,4	+
chr20	24944502	24944503	ENSG00000101474.7:ENST00000217456.2:chr20:24944502:-	1104	-
chr22	39714477	39714478	ENSG00000100316.11:ENST00000216146.4:chr22:39714477:-	1179	-
chr22	39714577	39714578	ENSG00000100316.11:ENST00000216146.4:chr22:39714577:-	1178	-
chr22	39712740	39712741	ENSG00000100316.11:ENST00000216146.4:chr22:39712740:-	1179	-
chr22	39708982	39708983	ENSG00000100316.11:ENST00000216146.4:chr22:39708982:-	1179	-
chr2	9468016	9468017	ENSG00000151693.5:ENST00000281419.3:chr2:9468016:+	1,1	+
chr2	43452007	43452008	ENSG00000152518.5:ENST00000282388.3:chr2:43452007:-	1,22	-
chr2	43452811	43452812	ENSG00000152518.5:ENST00000282388.3:chr2:43452811:-	1,21	-
chr2	70066671	70066672	ENSG00000087338.4:ENST00000282570.3:chr2:70066671:+	1,49	+
chr2	109365507	109365508	ENSG00000153201.11:ENST00000283195.6:chr2:109365507:+	1,8	+
chr2	109368328	109368329	ENSG00000153201.11:ENST00000283195.6:chr2:109368328:+	1,9	+
chr2	109381553	109381554	ENSG00000153201.11:ENST00000283195.6:chr2:109381553:+	1,19	+
chr2	109392260	109392261	ENSG00000153201.11:ENST00000283195.6:chr2:109392260:+	1,30	+
chr2	198571543	198571544	ENSG00000247626.3:ENST00000282276.6:chr2:198571543:+	1,22	+
chr2	223496365	223496366	ENSG00000116120.8:ENST00000281828.6:chr2:223496365:-	1,95	-
chr2	223436734	223436735	ENSG00000116120.8:ENST00000281828.6:chr2:223436734:-	2,95	-
chr3	113784277	113784278	ENSG00000151576.6:ENST00000281273.4:chr3:113784277:+	1,17	+
chr3	113798830	113798831	ENSG00000151576.6:ENST00000281273.4:chr3:113798830:+	1,18	+
chr3	120469573	120469574	ENSG00000153767.5:ENST00000283875.5:chr3:120469573:+	1,25	+
chr3	120489577	120489578	ENSG00000153767.5:ENST00000283875.5:chr3:120489577:+	1,26	+
chr4	144447572	144447573	ENSG00000153147.5:ENST00000283131.3:chr4:144447572:+	1203	+
chr4	144460022	144460023	ENSG00000153147.5:ENST00000283131.3:chr4:144460022:+	1207	+
chr4	144461518	144461519	ENSG00000153147.5:ENST00000283131.3:chr4:144461518:+	1209	+
chr5	1463837	1463838	ENSG00000153395.5:ENST00000283415.3:chr5:1463837:-	1,35	-
chr6	10891780	10891781	ENSG00000153157.8:ENST00000283141.6:chr6:10891780:+	1,1	+
chr7	27213896	27213897	ENSG00000253293.3:ENST00000283921.4:chr7:27213896:-	1,37	-
chr10	94450048	94450049	ENSG00000152804.6:ENST00000282728.5:chr10:94450048:+	1,4	+
chr11	78147724	78147725	ENSG00000137513.5:ENST00000281038.5:chr11:78147724:-	1,27	-
chr11	111896336	111896337	ENSG00000150768.11:ENST00000280346.6:chr11:111896336:+	1,76	+
chr11	111904141	111904142	ENSG00000150768.11:ENST00000280346.6:chr11:111904141:+	1,77	+
chr11	111910109	111910110	ENSG00000150768.11:ENST00000280346.6:chr11:111910109:+	1,78	+
chr13	79189883	79189884	ENSG00000152193.7:ENST00000282003.6:chr13:79189883:-	1,60	-
chr15	22851066	22851067	ENSG00000153575.6:ENST00000283645.4:chr15:22851066:+	1,18	+
chr16	75446442	75446443	ENSG00000153774.4:ENST00000283882.3:chr16:75446442:-	1,5	-
chr17	55335694	55335695	ENSG00000153944.6:ENST00000284073.2:chr17:55335694:+	1,14	+
chr18	29444693	29444694	ENSG00000153339.9:ENST00000283351.4:chr18:29444693:-	1,34	-
chr18	29435725	29435726	ENSG00000153339.9:ENST00000283351.4:chr18:29435725:-	1,33	-
chr14	35593292	35593293	ENSG00000258790.1:ENST00000557565.1:chr14:35593292:+	1,5	+
chr15	56923713	56923714	ENSG00000137871.15:ENST00000559237.1:chr15:56923713:-	1,1	-
chr15	59063925	59063926	ENSG00000128923.6:ENST00000559228.1:chr15:59063925:+	1,6	+
chr15	64388262	64388263	ENSG00000028528.10:ENST00000559844.1:chr15:64388262:+	1,48	+
chr15	64418294	64418295	ENSG00000028528.10:ENST00000559844.1:chr15:64418294:+	1,49	+
chr16	27561000	27561001	ENSG00000077235.13:ENST00000561623.1:chr16:27561000:-	1,9	-
chr17	62527106	62527107	ENSG00000258890.2:ENST00000556440.2:chr17:62527106:+	1,14	+
chr1	53675761	53675762	ENSG00000157184.5:ENST00000371486.3:chr1:53675761:+	1,30	+
chr1	55224531	55224532	ENSG00000162396.5:ENST00000371279.3:chr1:55224531:-	1,8	-
chr1	55319865	55319866	ENSG00000116133.7:ENST00000371269.3:chr1:55319865:-	1,77	-
chr1	55319282	55319283	ENSG00000116133.7:ENST00000371269.3:chr1:55319282:-	1,77	-
chr1	58999834	58999835	ENSG00000162600.7:ENST00000371226.3:chr1:58999834:-	1,17	-
chr1	59248154	59248155	ENSG00000177606.5:ENST00000371222.2:chr1:59248154:-	1162	-
chr1	59248217	59248218	ENSG00000177606.5:ENST00000371222.2:chr1:59248217:-	1162	-
chr1	59248392	59248393	ENSG00000177606.5:ENST00000371222.2:chr1:59248392:-	1161	-
chr1	67895735	67895736	ENSG00000142864.10:ENST00000370995.2:chr1:67895735:-	1140	-
chr1	70644627	70644628	ENSG00000066557.5:ENST00000370952.3:chr1:70644627:-	1,71	-
chr1	70641572	70641573	ENSG00000066557.5:ENST00000370952.3:chr1:70641572:-	1,72	-
chr1	70618199	70618200	ENSG00000066557.5:ENST00000370952.3:chr1:70618199:-	1,72	-
chr1	70728453	70728454	ENSG00000118454.8:ENST00000370944.4:chr1:70728453:-	1,27	-
chr1	71535036	71535037	ENSG00000132485.8:ENST00000370920.3:chr1:71535036:-	1,69	-
chr1	77635030	77635031	ENSG00000142892.10:ENST00000370812.3:chr1:77635030:-	1,71	-
chr1	78047520	78047521	ENSG00000036549.8:ENST00000370801.3:chr1:78047520:-	1,7	-
chr1	78204981	78204982	ENSG00000077254.10:ENST00000370794.3:chr1:78204981:-	1,19	-
chr1	78187732	78187733	ENSG00000077254.10:ENST00000370794.3:chr1:78187732:-	1,18	-
chr1	78180394	78180395	ENSG00000077254.10:ENST00000370794.3:chr1:78180394:-	1,17	-
chr1	78478837	78478838	ENSG00000162616.8:ENST00000370763.5:chr1:78478837:+	1,8	+
chr1	84946662	84946663	ENSG00000117133.6:ENST00000370654.5:chr1:84946662:+	1,35	+
chr6	44360541	44360542	ENSG00000096401.7:ENST00000371477.3:chr6:44360541:+	1142	+
chr6	44371586	44371587	ENSG00000096401.7:ENST00000371477.3:chr6:44371586:+	1142	+
chr6	56919624	56919625	ENSG00000168116.9:ENST00000370733.4:chr6:56919624:+	1,13	+
chr9	139937798	139937799	ENSG00000107281.5:ENST00000371600.3:chr9:139937798:-	1,1	-
chr10	98287189	98287190	ENSG00000077147.10:ENST00000371142.4:chr10:98287189:-	1,70	-
chr10	99125931	99125932	ENSG00000052749.9:ENST00000370992.4:chr10:99125931:-	1,31	-
chr20	49195859	49195860	ENSG00000196396.5:ENST00000371621.3:chr20:49195859:+	1,11	+
chrX	119059286	119059287	ENSG00000101882.5:ENST00000371410.3:chrX:119059286:-	1,10	-
chrX	132458340	132458341	ENSG00000076716.7:ENST00000370828.3:chrX:132458340:-	1,11	-
chrX	132887515	132887516	ENSG00000147257.9:ENST00000370818.3:chrX:132887515:-	1,97	-
chrX	132888072	132888073	ENSG00000147257.9:ENST00000370818.3:chrX:132888072:-	1,96	-
chrX	132888144	132888145	ENSG00000147257.9:ENST00000370818.3:chrX:132888144:-	1,96	-
chr1	36748274	36748275	ENSG00000054118.9:ENST00000354618.5:chr1:36748274:+	1,27	+
chr1	36752433	36752434	ENSG00000054118.9:ENST00000354618.5:chr1:36752433:+	1,27	+
chr1	36752747	36752748	ENSG00000054118.9:ENST00000354618.5:chr1:36752747:+	1,27	+
chr1	36755183	36755184	ENSG00000054118.9:ENST00000354618.5:chr1:36755183:+	1,25	+
chr1	46094050	46094051	ENSG00000159592.6:ENST00000355105.3:chr1:46094050:-	1,37	-
chr1	165649891	165649892	ENSG00000143149.8:ENST00000354775.4:chr1:165649891:-	1153	-
chr1	165632293	165632294	ENSG00000143149.8:ENST00000354775.4:chr1:165632293:-	1153	-
chr2	178483080	178483081	ENSG00000197557.6:ENST00000355689.5:chr2:178483080:-	2,9	-
chr3	11374457	11374458	ENSG00000197548.8:ENST00000354449.3:chr3:11374457:+	1,6	+
chr3	48310059	48310060	ENSG00000164048.9:ENST00000354698.3:chr3:48310059:+	1,40	+
chr5	150519799	150519800	ENSG00000197043.9:ENST00000354546.5:chr5:150519799:-	1,34	-
chr5	150514014	150514015	ENSG00000197043.9:ENST00000354546.5:chr5:150514014:-	1,34	-
chr5	179320261	179320262	ENSG00000197226.8:ENST00000355235.3:chr5:179320261:-	1,31	-
chr5	179306653	179306654	ENSG00000197226.8:ENST00000355235.3:chr5:179306653:-	1,31	-
chr5	179297332	179297333	ENSG00000197226.8:ENST00000355235.3:chr5:179297332:-	1,43	-
chr7	127724829	127724830	ENSG00000197157.6:ENST00000354725.3:chr7:127724829:+	1,88	+
chr7	139083430	139083431	ENSG00000146963.13:ENST00000354926.4:chr7:139083430:+	1145	+
chr7	141255334	141255335	ENSG00000006530.11:ENST00000355413.4:chr7:141255334:+	1102	+
chr10	5496273	5496274	ENSG00000173848.14:ENST00000355029.4:chr10:5496273:+	1,74	+
chr10	5498208	5498209	ENSG00000173848.14:ENST00000355029.4:chr10:5498208:+	1,74	+
chr10	5498215	5498216	ENSG00000173848.14:ENST00000355029.4:chr10:5498215:+	1,74	+
chr11	13743301	13743302	ENSG00000197601.8:ENST00000354817.3:chr11:13743301:+	1,58	+
chr11	71146816	71146817	ENSG00000172893.11:ENST00000355527.3:chr11:71146816:-	2,38	-
chr13	77589657	77589658	ENSG00000005812.6:ENST00000355619.5:chr13:77589657:-	1,47	-
chr14	24655938	24655939	ENSG00000196497.11:ENST00000354464.6:chr14:24655938:-	1,55	-
chr14	24653296	24653297	ENSG00000196497.11:ENST00000354464.6:chr14:24653296:-	1,55	-
chr14	24652542	24652543	ENSG00000196497.11:ENST00000354464.6:chr14:24652542:-	1,55	-
chr16	88105754	88105755	ENSG00000172530.15:ENST00000355022.4:chr16:88105754:+	1,1	+
chr16	88105815	88105816	ENSG00000172530.15:ENST00000355022.4:chr16:88105815:+	1,1	+
chr17	41170700	41170701	ENSG00000108828.11:ENST00000355653.3:chr17:41170700:-	1,37	-
chr17	80847548	80847549	ENSG00000141556.16:ENST00000355528.4:chr17:80847548:+	1,13	+
chr20	57610095	57610096	ENSG00000101166.11:ENST00000355937.4:chr20:57610095:-	1137	-
chr22	30985202	30985203	ENSG00000100029.13:ENST00000354694.7:chr22:30985202:-	1,70	-
chrX	114864228	114864229	ENSG00000102024.13:ENST00000355899.3:chrX:114864228:+	1431	+
chrX	114869300	114869301	ENSG00000102024.13:ENST00000355899.3:chrX:114869300:+	1431	+
chrX	114871148	114871149	ENSG00000102024.13:ENST00000355899.3:chrX:114871148:+	1431	+
chrX	114882319	114882320	ENSG00000102024.13:ENST00000355899.3:chrX:114882319:+	1430	+
chrX	114882323	114882324	ENSG00000102024.13:ENST00000355899.3:chrX:114882323:+	1430	+
chr1	144930960	144930961	ENSG00000178104.15:ENST00000529945.1:chr1:144930960:-	1,12	-
chr6	131222117	131222118	ENSG00000079819.12:ENST00000530481.1:chr6:131222117:-	1,6	-
chr7	135106961	135106962	ENSG00000080802.14:ENST00000541284.1:chr7:135106961:-	1,4	-
chr8	17796498	17796499	ENSG00000078674.13:ENST00000517730.1:chr8:17796498:+	1,5	+
chr8	48874644	48874645	ENSG00000104738.12:ENST00000523944.1:chr8:48874644:+	1323	+
chr8	48882527	48882528	ENSG00000104738.12:ENST00000523944.1:chr8:48882527:+	1323	+
chr8	48882540	48882541	ENSG00000104738.12:ENST00000523944.1:chr8:48882540:+	1322	+
chr8	48882577	48882578	ENSG00000104738.12:ENST00000523944.1:chr8:48882577:+	1323	+
chr8	48883231	48883232	ENSG00000104738.12:ENST00000523944.1:chr8:48883231:+	1323	+
chr8	48889322	48889323	ENSG00000104738.12:ENST00000523944.1:chr8:48889322:+	1318	+
chr8	130867912	130867913	ENSG00000153310.14:ENST00000519824.2:chr8:130867912:-	1,15	-
chr11	64951000	64951001	ENSG00000014216.11:ENST00000533820.1:chr11:64951000:+	1,7	+
chr4	6302557	6302558	ENSG00000109501.9:ENST00000226760.1:chr4:6302557:+	1,8	+
chr5	54662656	54662657	ENSG00000039123.11:ENST00000230640.5:chr5:54662656:+	1,89	+
chr5	54674302	54674303	ENSG00000039123.11:ENST00000230640.5:chr5:54674302:+	1,89	+
chr5	54683823	54683824	ENSG00000039123.11:ENST00000230640.5:chr5:54683823:+	1,89	+
chr5	54693315	54693316	ENSG00000039123.11:ENST00000230640.5:chr5:54693315:+	1,89	+
chr5	102894849	102894850	ENSG00000112874.5:ENST00000230792.2:chr5:102894849:-	1,19	-
chr6	35423815	35423816	ENSG00000112039.3:ENST00000229769.2:chr6:35423815:+	1,3	+
chr6	36075367	36075368	ENSG00000112062.6:ENST00000229795.3:chr6:36075367:+	1,9	+
chr6	41897876	41897877	ENSG00000112578.5:ENST00000230340.4:chr6:41897876:+	1,21	+
chr6	43098110	43098111	ENSG00000112655.11:ENST00000230419.4:chr6:43098110:+	1,26	+
chr6	43106965	43106966	ENSG00000112655.11:ENST00000230419.4:chr6:43106965:+	1,26	+
chr6	53380947	53380948	ENSG00000001084.6:ENST00000229416.6:chr6:53380947:-	1,20	-
chr6	53372380	53372381	ENSG00000001084.6:ENST00000229416.6:chr6:53372380:-	1,20	-
chr6	75977399	75977400	ENSG00000112697.11:ENST00000230461.6:chr6:75977399:-	1,67	-
chr6	75969081	75969082	ENSG00000112697.11:ENST00000230461.6:chr6:75969081:-	1,71	-
chr6	75965847	75965848	ENSG00000112697.11:ENST00000230461.6:chr6:75965847:-	1,72	-
chr11	116657289	116657290	ENSG00000109917.6:ENST00000227322.3:chr11:116657289:-	1,46	-
chr12	6979525	6979526	ENSG00000111669.10:ENST00000229270.4:chr12:6979525:+	1,25	+
chr12	10865851	10865852	ENSG00000060138.8:ENST00000228251.4:chr12:10865851:-	1,46	-
chr12	69094583	69094584	ENSG00000111581.5:ENST00000229179.4:chr12:69094583:+	1,85	+
chr12	69127252	69127253	ENSG00000111581.5:ENST00000229179.4:chr12:69127252:+	1,89	+
chr12	69136175	69136176	ENSG00000111581.5:ENST00000229179.4:chr12:69136175:+	1,83	+
chr12	96409454	96409455	ENSG00000111144.5:ENST00000228740.2:chr12:96409454:-	1,56	-
chr12	104458493	104458494	ENSG00000111727.7:ENST00000229330.4:chr12:104458493:+	1,8	+
chr12	104461804	104461805	ENSG00000111727.7:ENST00000229330.4:chr12:104461804:+	1,8	+
chr12	106751666	106751667	ENSG00000013503.5:ENST00000228347.4:chr12:106751666:+	1,31	+
chr12	106763446	106763447	ENSG00000013503.5:ENST00000228347.4:chr12:106763446:+	1,31	+
chr12	106827522	106827523	ENSG00000013503.5:ENST00000228347.4:chr12:106827522:+	1,31	+
chr12	106903232	106903233	ENSG00000013503.5:ENST00000228347.4:chr12:106903232:+	1,31	+
chr12	110897557	110897558	ENSG00000111231.4:ENST00000228827.3:chr12:110897557:-	8,21	-
chr12	120106186	120106187	ENSG00000111725.6:ENST00000229328.5:chr12:120106186:+	1,28	+
chr17	48472339	48472340	ENSG00000108829.9:ENST00000225972.7:chr17:48472339:-	1147	-
chr17	48470177	48470178	ENSG00000108829.9:ENST00000225972.7:chr17:48470177:-	1148	-
chr17	48470243	48470244	ENSG00000108829.9:ENST00000225972.7:chr17:48470243:-	1147	-
chr17	48462592	48462593	ENSG00000108829.9:ENST00000225972.7:chr17:48462592:-	1153	-
chr17	48462637	48462638	ENSG00000108829.9:ENST00000225972.7:chr17:48462637:-	1153	-
chr1	150416762	150416763	ENSG00000163125.11:ENST00000401000.4:chr1:150416762:+	1,2	+
chr3	112256730	112256731	ENSG00000144848.6:ENST00000402314.2:chr3:112256730:-	1,4	-
chr4	89591295	89591296	ENSG00000138641.11:ENST00000402738.1:chr4:89591295:+	1,6	+
chr7	1527563	1527564	ENSG00000164880.11:ENST00000404767.3:chr7:1527563:-	1,4	-
chr7	112096981	112096982	ENSG00000006652.9:ENST00000403825.3:chr7:112096981:+	1,73	+
chr8	66695049	66695050	ENSG00000205268.6:ENST00000401827.3:chr8:66695049:-	1,2	-
chr8	99139842	99139843	ENSG00000104356.6:ENST00000401707.2:chr8:99139842:+	1,8	+
chr9	134394235	134394236	ENSG00000130714.11:ENST00000402686.3:chr9:134394235:+	1,5	+
chr11	118922837	118922838	ENSG00000149428.14:ENST00000404233.3:chr11:118922837:-	1,20	-
chr11	118919799	118919800	ENSG00000149428.14:ENST00000404233.3:chr11:118919799:-	1,26	-
chr18	9549239	9549240	ENSG00000154845.11:ENST00000400556.3:chr18:9549239:-	2,5	-
chr18	9950538	9950539	ENSG00000101558.9:ENST00000400000.2:chr18:9950538:+	1,67	+
chr18	18690810	18690811	ENSG00000067900.6:ENST00000399799.2:chr18:18690810:-	1,61	-
chr18	18625373	18625374	ENSG00000067900.6:ENST00000399799.2:chr18:18625373:-	1,63	-
chr18	18603621	18603622	ENSG00000067900.6:ENST00000399799.2:chr18:18603621:-	1,68	-
chr18	18586384	18586385	ENSG00000067900.6:ENST00000399799.2:chr18:18586384:-	1,68	-
chr19	36594367	36594368	ENSG00000075702.12:ENST00000401500.2:chr19:36594367:+	1,2	+
chr21	33067229	33067230	ENSG00000156304.10:ENST00000399804.1:chr21:33067229:-	1,16	-
chr22	20109904	20109905	ENSG00000099901.12:ENST00000402752.1:chr22:20109904:+	1,48	+
chr22	39917506	39917507	ENSG00000128272.10:ENST00000404241.2:chr22:39917506:+	1,14	+
chr22	42463186	42463187	ENSG00000198951.7:ENST00000402937.1:chr22:42463186:-	1,3	-
chr4	41945770	41945771	ENSG00000109133.8:ENST00000504986.1:chr4:41945770:+	1,11	+
chr4	159624591	159624592	ENSG00000171503.7:ENST00000511912.1:chr4:159624591:+	1,28	+
chr5	44809544	44809545	ENSG00000112996.5:ENST00000507110.1:chr5:44809544:+	1,28	+
chr5	110428190	110428191	ENSG00000134987.7:ENST00000506538.2:chr5:110428190:+	2,54	+
chr5	110446577	110446578	ENSG00000134987.7:ENST00000506538.2:chr5:110446577:+	1,60	+
chr5	176942770	176942771	ENSG00000183258.7:ENST00000507955.1:chr5:176942770:-	4,25	-
chr5	176938911	176938912	ENSG00000183258.7:ENST00000507955.1:chr5:176938911:-	1,25	-
chr6	83888414	83888415	ENSG00000013375.11:ENST00000513973.1:chr6:83888414:-	1,41	-
chr18	13040871	13040872	ENSG00000101639.14:ENST00000506447.1:chr18:13040871:+	1,2	+
chr5	149743759	149743760	ENSG00000070814.13:ENST00000513346.1:chr5:149743759:+	1,6	+
chr5	149775956	149775957	ENSG00000070814.13:ENST00000513346.1:chr5:149775956:+	1,7	+
chr1	11272444	11272445	ENSG00000198793.8:ENST00000361445.4:chr1:11272444:-	1,4	-
chr1	54678177	54678178	ENSG00000116221.11:ENST00000360840.5:chr1:54678177:+	1,35	+
chr1	167691475	167691476	ENSG00000197965.7:ENST00000359523.2:chr1:167691475:+	1,49	+
chr1	167734924	167734925	ENSG00000197965.7:ENST00000359523.2:chr1:167734924:+	1,49	+
chr1	167734969	167734970	ENSG00000197965.7:ENST00000359523.2:chr1:167734969:+	1,49	+
chr3	69120766	69120767	ENSG00000144744.12:ENST00000361055.4:chr3:69120766:-	1,47	-
chr5	137848491	137848492	ENSG00000120705.8:ENST00000360541.5:chr5:137848491:-	2,93	-
chr9	35068271	35068272	ENSG00000165280.11:ENST00000358901.6:chr9:35068271:-	1441	-
chr9	35067915	35067916	ENSG00000165280.11:ENST00000358901.6:chr9:35067915:-	1451	-
chr9	35066728	35066729	ENSG00000165280.11:ENST00000358901.6:chr9:35066728:-	1451	-
chr9	35066786	35066787	ENSG00000165280.11:ENST00000358901.6:chr9:35066786:-	1451	-
chr9	35066806	35066807	ENSG00000165280.11:ENST00000358901.6:chr9:35066806:-	1451	-
chr9	35062255	35062256	ENSG00000165280.11:ENST00000358901.6:chr9:35062255:-	1465	-
chr9	35059517	35059518	ENSG00000165280.11:ENST00000358901.6:chr9:35059517:-	1471	-
chr9	35059172	35059173	ENSG00000165280.11:ENST00000358901.6:chr9:35059172:-	1471	-
chr9	35059177	35059178	ENSG00000165280.11:ENST00000358901.6:chr9:35059177:-	1471	-
chr9	35057386	35057387	ENSG00000165280.11:ENST00000358901.6:chr9:35057386:-	1471	-
chr9	96439135	96439136	ENSG00000197724.6:ENST00000359246.4:chr9:96439135:+	1,2	+
chr10	70946274	70946275	ENSG00000156502.9:ENST00000359655.4:chr10:70946274:+	1,53	+
chr10	70967653	70967654	ENSG00000156502.9:ENST00000359655.4:chr10:70967653:+	1,54	+
chr10	103569989	103569990	ENSG00000198408.9:ENST00000361464.3:chr10:103569989:-	1,38	-
chr10	103546331	103546332	ENSG00000198408.9:ENST00000361464.3:chr10:103546331:-	1,39	-
chr12	121855477	121855478	ENSG00000170633.12:ENST00000361234.5:chr12:121855477:+	1,23	+
chr13	115028368	115028369	ENSG00000130177.10:ENST00000360383.3:chr13:115028368:+	1,8	+
chr17	1375212	1375213	ENSG00000197879.10:ENST00000361007.2:chr17:1375212:-	1,13	-
chr17	46135860	46135861	ENSG00000082641.11:ENST00000362042.3:chr17:46135860:+	1,5	+
chr17	66251951	66251952	ENSG00000196704.7:ENST00000359904.3:chr17:66251951:+	1,55	+
chr19	5707806	5707807	ENSG00000196365.7:ENST00000360614.3:chr19:5707806:-	1,21	-
chr19	5699048	5699049	ENSG00000196365.7:ENST00000360614.3:chr19:5699048:-	1,21	-
chr20	34309690	34309691	ENSG00000131051.16:ENST00000361162.6:chr20:34309690:-	1150	-
chr20	34297157	34297158	ENSG00000131051.16:ENST00000361162.6:chr20:34297157:-	1148	-
chr20	34295107	34295108	ENSG00000131051.16:ENST00000361162.6:chr20:34295107:-	1150	-
chr1	46073499	46073500	ENSG00000132780.12:ENST00000402363.3:chr1:46073499:+	1,6	+
chr2	61725857	61725858	ENSG00000082898.12:ENST00000401558.2:chr2:61725857:-	1102	-
chr2	61721178	61721179	ENSG00000082898.12:ENST00000401558.2:chr2:61721178:-	1107	-
chr2	61719208	61719209	ENSG00000082898.12:ENST00000401558.2:chr2:61719208:-	1107	-
chr2	61717818	61717819	ENSG00000082898.12:ENST00000401558.2:chr2:61717818:-	1107	-
chr2	61713077	61713078	ENSG00000082898.12:ENST00000401558.2:chr2:61713077:-	1107	-
chr13	49705304	49705305	ENSG00000102531.12:ENST00000398316.3:chr13:49705304:+	1,7	+
chr13	49765462	49765463	ENSG00000102531.12:ENST00000398316.3:chr13:49765462:+	1,7	+
chr14	100551134	100551135	ENSG00000196405.8:ENST00000402714.2:chr14:100551134:+	1,9	+
chr14	100607534	100607535	ENSG00000196405.8:ENST00000402714.2:chr14:100607534:+	1,9	+
chr18	21761234	21761235	ENSG00000141447.12:ENST00000399443.3:chr18:21761234:-	1,3	-
chr22	20102492	20102493	ENSG00000099899.10:ENST00000403707.3:chr22:20102492:-	1,3	-
chrX	41193530	41193531	ENSG00000215301.5:ENST00000399959.2:chrX:41193530:+	1242	+
chrX	41200846	41200847	ENSG00000215301.5:ENST00000399959.2:chrX:41200846:+	1247	+
chrX	41201995	41201996	ENSG00000215301.5:ENST00000399959.2:chrX:41201995:+	1250	+
chrX	41204452	41204453	ENSG00000215301.5:ENST00000399959.2:chrX:41204452:+	1256	+
chrX	41204481	41204482	ENSG00000215301.5:ENST00000399959.2:chrX:41204481:+	1256	+
chrX	41204490	41204491	ENSG00000215301.5:ENST00000399959.2:chrX:41204490:+	1257	+
chrX	41205545	41205546	ENSG00000215301.5:ENST00000399959.2:chrX:41205545:+	1262	+
chrX	41206201	41206202	ENSG00000215301.5:ENST00000399959.2:chrX:41206201:+	1267	+
chr5	149743697	149743698	ENSG00000070814.13:ENST00000427724.2:chr5:149743697:+	1,6	+
chr1	215775262	215775263	ENSG00000136636.8:ENST00000259154.4:chr1:215775262:+	1,16	+
chr2	27700966	27700967	ENSG00000138002.10:ENST00000260570.3:chr2:27700966:-	1,3	-
chr2	44173322	44173323	ENSG00000138095.14:ENST00000260665.7:chr2:44173322:-	1,97	-
chr2	65467032	65467033	ENSG00000138071.9:ENST00000260641.5:chr2:65467032:+	1161	+
chr2	65495831	65495832	ENSG00000138071.9:ENST00000260641.5:chr2:65495831:+	1177	+
chr2	187541928	187541929	ENSG00000138448.7:ENST00000261023.3:chr2:187541928:+	1,7	+
chr2	190530884	190530885	ENSG00000138381.5:ENST00000260952.4:chr2:190530884:+	1,57	+
chr2	233431826	233431827	ENSG00000135930.9:ENST00000258416.3:chr2:233431826:+	1,4	+
chr3	122514161	122514162	ENSG00000138463.8:ENST00000261038.5:chr3:122514161:+	1,7	+
chr3	132222184	132222185	ENSG00000138246.11:ENST00000260818.6:chr3:132222184:+	1,9	+
chr3	133342903	133342904	ENSG00000163781.8:ENST00000260810.5:chr3:133342903:-	1,30	-
chr3	133327417	133327418	ENSG00000163781.8:ENST00000260810.5:chr3:133327417:-	1,28	-
chr6	1391180	1391181	ENSG00000137273.3:ENST00000259806.1:chr6:1391180:+	1,1	+
chr7	6513845	6513846	ENSG00000136240.5:ENST00000258739.4:chr7:6513845:-	1121	-
chr7	6513894	6513895	ENSG00000136240.5:ENST00000258739.4:chr7:6513894:-	1121	-
chr7	16725555	16725556	ENSG00000136261.10:ENST00000258761.3:chr7:16725555:+	1,34	+
chr7	16725651	16725652	ENSG00000136261.10:ENST00000258761.3:chr7:16725651:+	1,34	+
chr7	45139977	45139978	ENSG00000136270.9:ENST00000258770.3:chr7:45139977:-	1,26	-
chr8	59488478	59488479	ENSG00000137575.7:ENST00000260130.4:chr8:59488478:+	1,67	+
chr10	91478482	91478483	ENSG00000138182.10:ENST00000260753.4:chr10:91478482:+	1,26	+
chr10	91479191	91479192	ENSG00000138182.10:ENST00000260753.4:chr10:91479191:+	1,26	+
chr12	14941925	14941926	ENSG00000084463.3:ENST00000261167.2:chr12:14941925:-	1113	-
chr12	14940143	14940144	ENSG00000084463.3:ENST00000261167.2:chr12:14940143:-	1113	-
chr12	25047356	25047357	ENSG00000060982.10:ENST00000261192.7:chr12:25047356:-	2,40	-
chr12	27078737	27078738	ENSG00000064102.10:ENST00000261191.7:chr12:27078737:-	1,54	-
chr13	48615124	48615125	ENSG00000136159.3:ENST00000258662.2:chr13:48615124:+	1,41	+
chr15	44778872	44778873	ENSG00000137770.9:ENST00000260327.4:chr15:44778872:+	1,28	+
chr15	78789574	78789575	ENSG00000136381.8:ENST00000258886.8:chr15:78789574:+	1,23	+
chr17	47903446	47903447	ENSG00000136504.7:ENST00000259021.4:chr17:47903446:+	1,21	+
chr17	48559712	48559713	ENSG00000136444.5:ENST00000258955.2:chr17:48559712:+	1,43	+
chr1	156180136	156180137	ENSG00000160785.9:ENST00000359511.4:chr1:156180136:+	1,18	+
chr1	183596695	183596696	ENSG00000162704.11:ENST00000359856.6:chr1:183596695:-	1,93	-
chr2	210867446	210867447	ENSG00000197713.10:ENST00000359429.6:chr2:210867446:+	1,33	+
chr3	145802982	145802983	ENSG00000152952.7:ENST00000360060.3:chr3:145802982:-	1,14	-
chr9	21334277	21334278	ENSG00000198642.5:ENST00000359039.4:chr9:21334277:-	1,60	-
chr9	86587823	86587824	ENSG00000165119.14:ENST00000360384.5:chr9:86587823:-	1,86	-
chr9	86585673	86585674	ENSG00000165119.14:ENST00000360384.5:chr9:86585673:-	1,86	-
chr9	86585686	86585687	ENSG00000165119.14:ENST00000360384.5:chr9:86585686:-	1,86	-
chr10	71119688	71119689	ENSG00000156515.17:ENST00000359426.6:chr10:71119688:+	1,53	+
chr10	71129027	71129028	ENSG00000156515.17:ENST00000359426.6:chr10:71129027:+	1,53	+
chr10	71154733	71154734	ENSG00000156515.17:ENST00000359426.6:chr10:71154733:+	1,53	+
chr14	96800798	96800799	ENSG00000066739.7:ENST00000359933.4:chr14:96800798:-	1,6	-
chr14	96758409	96758410	ENSG00000066739.7:ENST00000359933.4:chr14:96758409:-	1,6	-
chr14	102495923	102495924	ENSG00000197102.6:ENST00000360184.4:chr14:102495923:+	1,11	+
chr1	24078141	24078142	ENSG00000011007.8:ENST00000418390.2:chr1:24078141:+	1,56	+
chr2	48678207	48678208	ENSG00000162869.11:ENST00000416913.1:chr2:48678207:+	1,2	+
chr2	200320683	200320684	ENSG00000119042.12:ENST00000417098.1:chr2:200320683:-	1,3	-
chr2	201846521	201846522	ENSG00000155744.5:ENST00000418596.3:chr2:201846521:-	1,10	-
chr3	48712045	48712046	ENSG00000213672.3:ENST00000416649.2:chr3:48712045:-	1,7	-
chr3	49397755	49397756	ENSG00000067560.6:ENST00000418115.1:chr3:49397755:-	1148	-
chr3	49397765	49397766	ENSG00000067560.6:ENST00000418115.1:chr3:49397765:-	1147	-
chr5	140038614	140038615	ENSG00000113141.11:ENST00000417647.2:chr5:140038614:+	1130	+
chr6	26638021	26638022	ENSG00000181315.6:ENST00000415922.2:chr6:26638021:-	1,13	-
chr7	151261240	151261241	ENSG00000106617.9:ENST00000418337.2:chr7:151261240:-	1,6	-
chr9	131020761	131020762	ENSG00000167110.12:ENST00000421699.2:chr9:131020761:-	1,2	-
chr11	120916510	120916511	ENSG00000154114.8:ENST00000422003.2:chr11:120916510:+	1,2	+
chr12	46322312	46322313	ENSG00000139218.13:ENST00000419565.2:chr12:46322312:-	1,6	-
chr12	112103461	112103462	ENSG00000089234.11:ENST00000419234.4:chr12:112103461:-	1,29	-
chr19	33076888	33076889	ENSG00000105185.7:ENST00000419343.3:chr19:33076888:+	1,3	+
chr12	122748706	122748707	ENSG00000139719.5:ENST00000267199.4:chr12:122748706:-	1,49	-
chr13	48878121	48878122	ENSG00000139687.9:ENST00000267163.4:chr13:48878121:+	1,27	+
chr15	41023366	41023367	ENSG00000051180.12:ENST00000267868.3:chr15:41023366:+	1,22	+
chr15	77363272	77363273	ENSG00000140391.10:ENST00000267970.4:chr15:77363272:-	1197	-
chr15	77339245	77339246	ENSG00000140391.10:ENST00000267970.4:chr15:77339245:-	1199	-
chr15	90118866	90118867	ENSG00000140534.9:ENST00000268138.7:chr15:90118866:+	2,4	+
chr15	91017363	91017364	ENSG00000140575.8:ENST00000268182.5:chr15:91017363:+	1,55	+
chr15	91422983	91422984	ENSG00000140564.6:ENST00000268171.3:chr15:91422983:+	2,3	+
chr16	89592744	89592745	ENSG00000197912.9:ENST00000268704.2:chr16:89592744:+	1,28	+
chr17	78115616	78115617	ENSG00000141543.5:ENST00000269349.3:chr17:78115616:-	1,93	-
chr18	12367353	12367354	ENSG00000141385.5:ENST00000269143.3:chr18:12367353:-	1,52	-
chr18	12358926	12358927	ENSG00000141385.5:ENST00000269143.3:chr18:12358926:-	1,53	-
chr18	19116083	19116084	ENSG00000141446.6:ENST00000269214.5:chr18:19116083:-	1,5	-
chr18	21087981	21087982	ENSG00000141452.5:ENST00000269221.3:chr18:21087981:+	1,26	+
chr18	21131611	21131612	ENSG00000141458.8:ENST00000269228.5:chr18:21131611:-	1,13	-
chr18	21124431	21124432	ENSG00000141458.8:ENST00000269228.5:chr18:21124431:-	1,13	-
chr18	25570174	25570175	ENSG00000170558.4:ENST00000269141.3:chr18:25570174:-	1,44	-
chr19	4362620	4362621	ENSG00000141985.5:ENST00000269886.3:chr19:4362620:-	1,15	-
chr21	34721554	34721555	ENSG00000142166.8:ENST00000270139.3:chr21:34721554:+	1,15	+
chr1	12030798	12030799	ENSG00000083444.12:ENST00000196061.4:chr1:12030798:+	1,27	+
chr1	92185504	92185505	ENSG00000069702.6:ENST00000212355.4:chr1:92185504:-	1,22	-
chr3	32533282	32533283	ENSG00000091317.7:ENST00000205636.3:chr3:32533282:-	1,70	-
chr5	41807487	41807488	ENSG00000083720.8:ENST00000196371.5:chr5:41807487:-	1,22	-
chr5	150073792	150073793	ENSG00000086589.7:ENST00000199814.4:chr5:150073792:-	1,47	-
chr5	150072483	150072484	ENSG00000086589.7:ENST00000199814.4:chr5:150072483:-	1,46	-
chr7	6098614	6098615	ENSG00000086232.8:ENST00000199389.6:chr7:6098614:-	1158	-
chr7	6089595	6089596	ENSG00000086232.8:ENST00000199389.6:chr7:6089595:-	1160	-
chr7	6086659	6086660	ENSG00000086232.8:ENST00000199389.6:chr7:6086659:-	1161	-
chr7	6084197	6084198	ENSG00000086232.8:ENST00000199389.6:chr7:6084197:-	1161	-
chr7	6080679	6080680	ENSG00000086232.8:ENST00000199389.6:chr7:6080679:-	1164	-
chr11	113614603	113614604	ENSG00000086827.4:ENST00000200135.3:chr11:113614603:-	1,54	-
chr12	53701362	53701363	ENSG00000094914.8:ENST00000209873.4:chr12:53701362:-	1,7	-
chr14	102552227	102552228	ENSG00000080824.14:ENST00000216281.8:chr14:102552227:-	1558	-
chr14	102552452	102552453	ENSG00000080824.14:ENST00000216281.8:chr14:102552452:-	1558	-
chr14	102551639	102551640	ENSG00000080824.14:ENST00000216281.8:chr14:102551639:-	1558	-
chr14	102549973	102549974	ENSG00000080824.14:ENST00000216281.8:chr14:102549973:-	1516	-
chr14	102550002	102550003	ENSG00000080824.14:ENST00000216281.8:chr14:102550002:-	1516	-
chr14	102548552	102548553	ENSG00000080824.14:ENST00000216281.8:chr14:102548552:-	1458	-
chr14	102548681	102548682	ENSG00000080824.14:ENST00000216281.8:chr14:102548681:-	1456	-
chr17	38447434	38447435	ENSG00000094804.5:ENST00000209728.4:chr17:38447434:+	1,82	+
chr17	38450258	38450259	ENSG00000094804.5:ENST00000209728.4:chr17:38450258:+	1,84	+
chr20	13752054	13752055	ENSG00000089048.10:ENST00000202816.1:chr20:13752054:-	1,13	-
chr22	22143030	22143031	ENSG00000100030.10:ENST00000215832.6:chr22:22143030:-	1,82	-
chr22	29976991	29976992	ENSG00000184117.7:ENST00000216121.7:chr22:29976991:-	1,58	-
chr22	30722693	30722694	ENSG00000099992.11:ENST00000215790.7:chr22:30722693:-	1,6	-
chr22	30689979	30689980	ENSG00000099992.11:ENST00000215790.7:chr22:30689979:-	1,7	-
chr22	32789891	32789892	ENSG00000100220.7:ENST00000216038.5:chr22:32789891:-	1,64	-
chr22	35796508	35796509	ENSG00000100297.11:ENST00000216122.4:chr22:35796508:+	1126	+
chr22	35802712	35802713	ENSG00000100297.11:ENST00000216122.4:chr22:35802712:+	1128	+
chr22	35806866	35806867	ENSG00000100297.11:ENST00000216122.4:chr22:35806866:+	1129	+
chr22	35808567	35808568	ENSG00000100297.11:ENST00000216122.4:chr22:35808567:+	1129	+
chr22	35809933	35809934	ENSG00000100297.11:ENST00000216122.4:chr22:35809933:+	1129	+
chr22	35815983	35815984	ENSG00000100297.11:ENST00000216122.4:chr22:35815983:+	1129	+
chr22	36684842	36684843	ENSG00000100345.16:ENST00000216181.5:chr22:36684842:-	1,11	-
chr22	36907796	36907797	ENSG00000100353.13:ENST00000216190.8:chr22:36907796:-	1,85	-
chr22	39813820	39813821	ENSG00000100324.9:ENST00000216160.6:chr22:39813820:+	1,35	+
chr22	40749109	40749110	ENSG00000239900.7:ENST00000216194.7:chr22:40749109:+	1,66	+
chr22	40761034	40761035	ENSG00000239900.7:ENST00000216194.7:chr22:40761034:+	1,66	+
chr22	41231567	41231568	ENSG00000100380.8:ENST00000216218.3:chr22:41231567:-	1150	-
chr22	41615497	41615498	ENSG00000100395.10:ENST00000216237.5:chr22:41615497:+	1,28	+
chr22	41911514	41911515	ENSG00000100412.11:ENST00000216254.4:chr22:41911514:+	1,75	+
chr22	41914530	41914531	ENSG00000100412.11:ENST00000216254.4:chr22:41914530:+	1,77	+
chr22	41924499	41924500	ENSG00000100412.11:ENST00000216254.4:chr22:41924499:+	1,77	+
chr22	43564830	43564831	ENSG00000100304.12:ENST00000216129.6:chr22:43564830:-	1,40	-
chr22	47087577	47087578	ENSG00000100422.9:ENST00000216264.8:chr22:47087577:-	1,18	-
chrX	68060442	68060443	ENSG00000090776.5:ENST00000204961.4:chrX:68060442:+	1,22	+
chr5	56177096	56177097	ENSG00000095015.5:ENST00000399503.3:chr5:56177096:+	1,11	+
chr5	139006346	139006347	ENSG00000131508.11:ENST00000398733.3:chr5:139006346:+	1,38	+
chr7	129841873	129841874	ENSG00000146842.12:ENST00000397622.2:chr7:129841873:-	1,53	-
chr10	70182092	70182093	ENSG00000138346.10:ENST00000399180.2:chr10:70182092:-	1,11	-
chr11	102272750	102272751	ENSG00000152558.10:ENST00000398136.2:chr11:102272750:-	1,55	-
chr12	46591541	46591542	ENSG00000111371.11:ENST00000398637.5:chr12:46591541:-	1,38	-
chr14	24709756	24709757	ENSG00000092330.11:ENST00000399423.4:chr14:24709756:-	1,7	-
chr16	16333734	16333735	ENSG00000103226.13:ENST00000399336.4:chr16:16333734:+	1,54	+
chr16	16345839	16345840	ENSG00000103226.13:ENST00000399336.4:chr16:16345839:+	1,56	+
chr16	16346332	16346333	ENSG00000103226.13:ENST00000399336.4:chr16:16346332:+	2,58	+
chr16	16357001	16357002	ENSG00000103226.13:ENST00000399336.4:chr16:16357001:+	1,58	+
chr17	44668149	44668150	ENSG00000073969.14:ENST00000398238.4:chr17:44668149:+	1137	+
chr17	44720573	44720574	ENSG00000073969.14:ENST00000398238.4:chr17:44720573:+	1143	+
chr17	44771256	44771257	ENSG00000073969.14:ENST00000398238.4:chr17:44771256:+	1148	+
chr17	44827147	44827148	ENSG00000073969.14:ENST00000398238.4:chr17:44827147:+	1150	+
chr17	44828899	44828900	ENSG00000073969.14:ENST00000398238.4:chr17:44828899:+	1150	+
chr17	60050228	60050229	ENSG00000108510.5:ENST00000397786.2:chr17:60050228:-	1,4	-
chr18	43664471	43664472	ENSG00000152234.11:ENST00000398752.6:chr18:43664471:-	1382	-
chr18	43664599	43664600	ENSG00000152234.11:ENST00000398752.6:chr18:43664599:-	1382	-
chr19	7974673	7974674	ENSG00000076984.13:ENST00000397983.3:chr19:7974673:+	1,5	+
chr21	35514762	35514763	ENSG00000243927.1:ENST00000399312.2:chr21:35514762:+	1,3	+
chr21	43412164	43412165	ENSG00000173276.9:ENST00000398511.3:chr21:43412164:-	1,7	-
chr22	22893401	22893402	ENSG00000185686.13:ENST00000398743.2:chr22:22893401:-	1,6	-
chr22	24466963	24466964	ENSG00000099991.12:ENST00000398319.2:chr22:24466963:+	1,1	+
chr22	29674189	29674190	ENSG00000182944.13:ENST00000397938.2:chr22:29674189:+	1176	+
chr22	29674192	29674193	ENSG00000182944.13:ENST00000397938.2:chr22:29674192:+	1176	+
chr22	29683049	29683050	ENSG00000182944.13:ENST00000397938.2:chr22:29683049:+	1176	+
chr22	29695307	29695308	ENSG00000182944.13:ENST00000397938.2:chr22:29695307:+	1176	+
chr22	29695736	29695737	ENSG00000182944.13:ENST00000397938.2:chr22:29695736:+	2176	+
chr22	29696147	29696148	ENSG00000182944.13:ENST00000397938.2:chr22:29696147:+	1176	+
chr2	55792071	55792072	ENSG00000138041.11:ENST00000345102.5:chr2:55792071:-	1,18	-
chr3	41267294	41267295	ENSG00000168036.12:ENST00000349496.5:chr3:41267294:+	1119	+
chr3	41275213	41275214	ENSG00000168036.12:ENST00000349496.5:chr3:41275213:+	1120	+
chr3	41275349	41275350	ENSG00000168036.12:ENST00000349496.5:chr3:41275349:+	1120	+
chr3	50144949	50144950	ENSG00000003756.12:ENST00000347869.3:chr3:50144949:+	1,26	+
[truncated: 1,318 more rows]

## Sheet: APOBEC1-only_rep2
chr1	52264009	52264010	ENSG00000078618.15:ENST00000352171.7:chr1:52264009:-	1,70	-
chr1	151171536	151171537	ENSG00000143398.15:ENST00000349792.5:chr1:151171536:+	1,95	+
chr1	151204176	151204177	ENSG00000143398.15:ENST00000349792.5:chr1:151204176:+	1,95	+
chr1	151210734	151210735	ENSG00000143398.15:ENST00000349792.5:chr1:151210734:+	1,99	+
chr2	24531533	24531534	ENSG00000198399.10:ENST00000355123.4:chr2:24531533:-	1,4	-
chr3	50140595	50140596	ENSG00000003756.12:ENST00000347869.3:chr3:50140595:+	1,34	+
chr10	5468624	5468625	ENSG00000173848.14:ENST00000355029.4:chr10:5468624:+	1,63	+
chr10	5495292	5495293	ENSG00000173848.14:ENST00000355029.4:chr10:5495292:+	1,63	+
chr10	5498674	5498675	ENSG00000173848.14:ENST00000355029.4:chr10:5498674:+	1,62	+
chr10	99212679	99212680	ENSG00000171307.14:ENST00000352634.4:chr10:99212679:+	1,9	+
chr12	56676696	56676697	ENSG00000062485.14:ENST00000351328.3:chr12:56676696:-	1120	-
chr12	56676378	56676379	ENSG00000062485.14:ENST00000351328.3:chr12:56676378:-	1120	-
chr12	56668655	56668656	ENSG00000062485.14:ENST00000351328.3:chr12:56668655:-	1120	-
chr12	115118767	115118768	ENSG00000135111.10:ENST00000349155.2:chr12:115118767:-	1,9	-
chr14	24651531	24651532	ENSG00000196497.11:ENST00000354464.6:chr14:24651531:-	1,57	-
chr17	38801855	38801856	ENSG00000073584.14:ENST00000348513.6:chr17:38801855:-	1,94	-
chr22	45574729	45574730	ENSG00000093000.14:ENST00000347635.4:chr22:45574729:+	1,61	+
chr1	23650140	23650141	ENSG00000125944.14:ENST00000374612.1:chr1:23650140:-	1,49	-
chr2	38976772	38976773	ENSG00000115875.14:ENST00000443213.1:chr2:38976772:-	1,36	-
chr4	83801957	83801958	ENSG00000138674.12:ENST00000508502.1:chr4:83801957:-	1,3	-
chr5	138643174	138643175	ENSG00000015479.13:ENST00000394805.3:chr5:138643174:+	1270	+
chr5	138643336	138643337	ENSG00000015479.13:ENST00000394805.3:chr5:138643336:+	1270	+
chr5	138658450	138658451	ENSG00000015479.13:ENST00000394805.3:chr5:138658450:+	1260	+
chr5	138661949	138661950	ENSG00000015479.13:ENST00000394805.3:chr5:138661949:+	2252	+
chr5	138665060	138665061	ENSG00000015479.13:ENST00000394805.3:chr5:138665060:+	1252	+
chr6	136597121	136597122	ENSG00000029363.11:ENST00000353331.4:chr6:136597121:-	1,20	-
chr20	54945589	54945590	ENSG00000087586.13:ENST00000395915.3:chr20:54945589:-	1,12	-
chr22	29678523	29678524	ENSG00000182944.13:ENST00000406548.1:chr22:29678523:+	1,93	+
chr22	29694792	29694793	ENSG00000182944.13:ENST00000406548.1:chr22:29694792:+	1,93	+
chr2	207026174	207026175	ENSG00000114942.9:ENST00000392222.2:chr2:207026174:+	1,12	+
chr10	121203236	121203237	ENSG00000198873.10:ENST00000392870.2:chr10:121203236:+	3,3	+
chr11	125472743	125472744	ENSG00000134910.8:ENST00000392708.4:chr11:125472743:+	1,76	+
chr11	125479420	125479421	ENSG00000134910.8:ENST00000392708.4:chr11:125479420:+	1,79	+
chr11	125482993	125482994	ENSG00000134910.8:ENST00000392708.4:chr11:125482993:+	1,79	+
chr11	125484299	125484300	ENSG00000134910.8:ENST00000392708.4:chr11:125484299:+	1,79	+
chr14	105962226	105962227	ENSG00000185347.13:ENST00000392523.4:chr14:105962226:+	2,2	+
chr17	56285931	56285932	ENSG00000011143.12:ENST00000393119.2:chr17:56285931:-	1,17	-
chr17	80579558	80579559	ENSG00000141580.11:ENST00000392325.4:chr17:80579558:-	1,64	-
chr12	56814885	56814886	ENSG00000111602.7:ENST00000553532.1:chr12:56814885:-	1,25	-
chr14	57857736	57857737	ENSG00000139977.9:ENST00000556492.1:chr14:57857736:+	1,30	+
chr14	81658981	81658982	ENSG00000165417.7:ENST00000553612.1:chr14:81658981:-	1,12	-
chr14	102825886	102825887	ENSG00000100865.10:ENST00000559514.1:chr14:102825886:-	1,3	-
chr15	76578043	76578044	ENSG00000140374.11:ENST00000557943.1:chr15:76578043:-	2,29	-
chr16	27519947	27519948	ENSG00000077235.13:ENST00000561623.1:chr16:27519947:-	1,8	-
chr16	47117258	47117259	ENSG00000171208.5:ENST00000562435.1:chr16:47117258:-	1,22	-
chr2	15737537	15737538	ENSG00000079785.10:ENST00000381341.2:chr2:15737537:+	1,45	+
chr2	15746137	15746138	ENSG00000079785.10:ENST00000381341.2:chr2:15746137:+	1,46	+
chr2	15760342	15760343	ENSG00000079785.10:ENST00000381341.2:chr2:15760342:+	1,46	+
chr4	10089507	10089508	ENSG00000071127.12:ENST00000382452.2:chr4:10089507:-	1,64	-
chr4	47880651	47880652	ENSG00000170448.7:ENST00000381538.3:chr4:47880651:-	1,11	-
chr5	53814474	53814475	ENSG00000178996.8:ENST00000381410.4:chr5:53814474:+	1,8	+
chr5	65105474	65105475	ENSG00000123213.18:ENST00000380985.5:chr5:65105474:+	1,40	+
chr7	5643010	5643011	ENSG00000075618.13:ENST00000382361.3:chr7:5643010:+	1,18	+
chr10	1087177	1087178	ENSG00000067064.6:ENST00000381344.3:chr10:1087177:-	1,55	-
chr10	3143591	3143592	ENSG00000067057.12:ENST00000381125.4:chr10:3143591:+	1,53	+
chr10	3155348	3155349	ENSG00000067057.12:ENST00000381125.4:chr10:3155348:+	1,53	+
chr10	3162144	3162145	ENSG00000067057.12:ENST00000381125.4:chr10:3162144:+	1,53	+
chr10	3178747	3178748	ENSG00000067057.12:ENST00000381125.4:chr10:3178747:+	1,53	+
chr13	22096765	22096766	ENSG00000165487.9:ENST00000382374.4:chr13:22096765:-	1,28	-
chr13	24410408	24410409	ENSG00000027001.7:ENST00000382172.3:chr13:24410408:-	1,27	-
chr13	25034149	25034150	ENSG00000102699.5:ENST00000381989.3:chr13:25034149:-	1,20	-
chr13	25033254	25033255	ENSG00000102699.5:ENST00000381989.3:chr13:25033254:-	1,20	-
chr13	25009343	25009344	ENSG00000102699.5:ENST00000381989.3:chr13:25009343:-	1,21	-
chr15	43708522	43708523	ENSG00000067369.9:ENST00000382044.4:chr15:43708522:-	1,15	-
chr16	4864554	4864555	ENSG00000140632.12:ENST00000381983.3:chr16:4864554:-	1,10	-
chr16	4862213	4862214	ENSG00000140632.12:ENST00000381983.3:chr16:4862213:-	1,10	-
chr21	34897088	34897089	ENSG00000159131.12:ENST00000381815.4:chr21:34897088:-	1143	-
chr21	34876808	34876809	ENSG00000159131.12:ENST00000381815.4:chr21:34876808:-	1138	-
chrX	7023826	7023827	ENSG00000130021.9:ENST00000381077.5:chrX:7023826:-	1,13	-
chr2	96873974	96873975	ENSG00000084090.9:ENST00000337288.5:chr2:96873974:-	1600	-
chr2	96874063	96874064	ENSG00000084090.9:ENST00000337288.5:chr2:96874063:-	1561	-
chr2	96861220	96861221	ENSG00000084090.9:ENST00000337288.5:chr2:96861220:-	1606	-
chr2	96859084	96859085	ENSG00000084090.9:ENST00000337288.5:chr2:96859084:-	1611	-
chr2	96858835	96858836	ENSG00000084090.9:ENST00000337288.5:chr2:96858835:-	1617	-
chr2	96858173	96858174	ENSG00000084090.9:ENST00000337288.5:chr2:96858173:-	1618	-
chr2	96853033	96853034	ENSG00000084090.9:ENST00000337288.5:chr2:96853033:-	1618	-
chr4	24578097	24578098	ENSG00000109606.8:ENST00000336812.4:chr4:24578097:-	1168	-
chr4	24544611	24544612	ENSG00000109606.8:ENST00000336812.4:chr4:24544611:-	1170	-
chr4	24541880	24541881	ENSG00000109606.8:ENST00000336812.4:chr4:24541880:-	1170	-
chr4	24531309	24531310	ENSG00000109606.8:ENST00000336812.4:chr4:24531309:-	1171	-
chr5	34922644	34922645	ENSG00000113460.8:ENST00000336767.5:chr5:34922644:+	1,38	+
chr9	114213712	114213713	ENSG00000136813.10:ENST00000338205.5:chr9:114213712:-	6,31	-
chr9	114176221	114176222	ENSG00000136813.10:ENST00000338205.5:chr9:114176221:-	1,31	-
chr9	114172386	114172387	ENSG00000136813.10:ENST00000338205.5:chr9:114172386:-	1,30	-
chr9	114152324	114152325	ENSG00000136813.10:ENST00000338205.5:chr9:114152324:-	1,30	-
chr9	114135486	114135487	ENSG00000136813.10:ENST00000338205.5:chr9:114135486:-	1,30	-
chr9	114134806	114134807	ENSG00000136813.10:ENST00000338205.5:chr9:114134806:-	1,30	-
chr9	114128812	114128813	ENSG00000136813.10:ENST00000338205.5:chr9:114128812:-	1,29	-
chr10	126683249	126683250	ENSG00000175029.12:ENST00000337195.5:chr10:126683249:-	1,16	-
chr11	18637346	18637347	ENSG00000179119.10:ENST00000336349.5:chr11:18637346:-	1,18	-
chr14	63856402	63856403	ENSG00000154001.9:ENST00000337537.3:chr14:63856402:-	1,36	-
chr15	77750785	77750786	ENSG00000140382.10:ENST00000336216.4:chr15:77750785:+	1,91	+
chr17	12920217	12920218	ENSG00000006744.14:ENST00000338034.4:chr17:12920217:-	1163	-
chr17	12908374	12908375	ENSG00000006744.14:ENST00000338034.4:chr17:12908374:-	1163	-
chr17	12905808	12905809	ENSG00000006744.14:ENST00000338034.4:chr17:12905808:-	1163	-
chr17	12897012	12897013	ENSG00000006744.14:ENST00000338034.4:chr17:12897012:-	1163	-
chr19	45495505	45495506	ENSG00000104853.11:ENST00000337392.5:chr19:45495505:+	2,25	+
chr20	4880215	4880216	ENSG00000089057.10:ENST00000338244.1:chr20:4880215:-	1,3	-
chr20	13509151	13509152	ENSG00000089123.11:ENST00000337743.4:chr20:13509151:-	1,8	-
chr22	17619535	17619536	ENSG00000069998.8:ENST00000336737.4:chr22:17619535:-	1,19	-
chrX	56591777	56591778	ENSG00000188021.7:ENST00000338222.5:chrX:56591777:+	1,90	+
chrX	56591822	56591823	ENSG00000188021.7:ENST00000338222.5:chrX:56591822:+	1,90	+
chr4	17579185	17579186	ENSG00000002549.8:ENST00000226299.4:chr4:17579185:+	1,60	+
chr4	17609202	17609203	ENSG00000002549.8:ENST00000226299.4:chr4:17609202:+	1,61	+
chr7	19748401	19748402	ENSG00000105849.5:ENST00000222567.5:chr7:19748401:-	1,19	-
chr7	100859529	100859530	ENSG00000106397.7:ENST00000223127.3:chr7:100859529:-	1,11	-
chr10	3212356	3212357	ENSG00000107959.11:ENST00000224949.4:chr10:3212356:-	1,83	-
chr10	3208473	3208474	ENSG00000107959.11:ENST00000224949.4:chr10:3208473:-	1,85	-
chr10	3199693	3199694	ENSG00000107959.11:ENST00000224949.4:chr10:3199693:-	1,90	-
chr10	3180275	3180276	ENSG00000107959.11:ENST00000224949.4:chr10:3180275:-	1,90	-
chr10	3180279	3180280	ENSG00000107959.11:ENST00000224949.4:chr10:3180279:-	1,90	-
chr10	81107352	81107353	ENSG00000108179.9:ENST00000225174.3:chr10:81107352:+	1,60	+
chr10	81111298	81111299	ENSG00000108179.9:ENST00000225174.3:chr10:81111298:+	1,60	+
chr17	26667365	26667366	ENSG00000109079.5:ENST00000226225.2:chr17:26667365:+	1,22	+
chr17	28770895	28770896	ENSG00000108582.7:ENST00000225719.4:chr17:28770895:+	1,34	+
chr17	46022935	46022936	ENSG00000108439.5:ENST00000225573.4:chr17:46022935:+	1,21	+
chr17	48462637	48462638	ENSG00000108829.9:ENST00000225972.7:chr17:48462637:-	1118	-
chr17	48460566	48460567	ENSG00000108829.9:ENST00000225972.7:chr17:48460566:-	1119	-
chr17	58012652	58012653	ENSG00000108443.9:ENST00000225577.4:chr17:58012652:+	1,38	+
chr17	62499355	62499356	ENSG00000108654.7:ENST00000225792.5:chr17:62499355:-	1316	-
chr17	62496729	62496730	ENSG00000108654.7:ENST00000225792.5:chr17:62496729:-	1316	-
chr19	36370070	36370071	ENSG00000105290.7:ENST00000221891.4:chr19:36370070:+	1,5	+
chr19	39340471	39340472	ENSG00000104824.12:ENST00000221419.5:chr19:39340471:-	1,42	-
chr19	39330804	39330805	ENSG00000104824.12:ENST00000221419.5:chr19:39330804:-	1,45	-
chr2	88890113	88890114	ENSG00000172071.7:ENST00000303236.3:chr2:88890113:-	1,17	-
chr3	49162203	49162204	ENSG00000172037.9:ENST00000305544.4:chr3:49162203:-	1,2	-
chr5	132424765	132424766	ENSG00000170606.9:ENST00000304858.2:chr5:132424765:+	1166	+
chr5	141008810	141008811	ENSG00000171720.5:ENST00000305264.3:chr5:141008810:-	1,34	-
chr5	141008174	141008175	ENSG00000171720.5:ENST00000305264.3:chr5:141008174:-	1,34	-
chr5	141005809	141005810	ENSG00000171720.5:ENST00000305264.3:chr5:141005809:-	1,34	-
chr7	32909448	32909449	ENSG00000170852.6:ENST00000304056.4:chr7:32909448:-	1,4	-
chr7	72985166	72985167	ENSG00000106638.11:ENST00000305632.5:chr7:72985166:-	1,54	-
chr9	136910513	136910514	ENSG00000169925.12:ENST00000303407.7:chr9:136910513:-	1,26	-
chr9	136901256	136901257	ENSG00000169925.12:ENST00000303407.7:chr9:136901256:-	1,23	-
chr11	63960617	63960618	ENSG00000168439.12:ENST00000305218.4:chr11:63960617:+	1109	+
chr11	63963159	63963160	ENSG00000168439.12:ENST00000305218.4:chr11:63963159:+	1109	+
chr11	63970962	63970963	ENSG00000168439.12:ENST00000305218.4:chr11:63970962:+	1109	+
chr11	68029223	68029224	ENSG00000171067.6:ENST00000304271.6:chr11:68029223:-	1,13	-
chr11	111594485	111594486	ENSG00000170145.4:ENST00000304987.3:chr11:111594485:+	1,8	+
chr12	56505014	56505015	ENSG00000170515.9:ENST00000303305.6:chr12:56505014:+	1126	+
chr14	75602521	75602522	ENSG00000170348.4:ENST00000303575.4:chr14:75602521:-	1106	-
chr15	41816019	41816020	ENSG00000103932.7:ENST00000304330.4:chr15:41816019:-	1,5	-
chr15	45695060	45695061	ENSG00000171763.13:ENST00000305560.6:chr15:45695060:+	1,26	+
chr16	18810081	18810082	ENSG00000170540.10:ENST00000304414.7:chr16:18810081:-	1113	-
chr17	685708	685709	ENSG00000171861.6:ENST00000304478.4:chr17:685708:+	1,21	+
chr17	1584056	1584057	ENSG00000174231.12:ENST00000304992.6:chr17:1584056:-	1,14	-
chr17	1576682	1576683	ENSG00000174231.12:ENST00000304992.6:chr17:1576682:-	1,13	-
chr19	29698782	29698783	ENSG00000169021.4:ENST00000304863.4:chr19:29698782:-	1,20	-
chr1	151638442	151638443	ENSG00000143376.8:ENST00000458013.2:chr1:151638442:+	1,7	+
chr7	75615021	75615022	ENSG00000127948.9:ENST00000461988.1:chr7:75615021:+	1,38	+
chr7	75615283	75615284	ENSG00000127948.9:ENST00000461988.1:chr7:75615283:+	1,38	+
chr7	102134987	102134988	ENSG00000170667.10:ENST00000465829.1:chr7:102134987:-	1,1	-
chr14	51716199	51716200	ENSG00000139921.8:ENST00000457354.2:chr14:51716199:+	1140	+
chr14	51721195	51721196	ENSG00000139921.8:ENST00000457354.2:chr14:51721195:+	2141	+
chr15	69076871	69076872	ENSG00000140350.11:ENST00000465139.2:chr15:69076871:-	1102	-
chr18	52946877	52946878	ENSG00000196628.9:ENST00000457482.3:chr18:52946877:-	1,1	-
chr20	5165577	5165578	ENSG00000101290.9:ENST00000460006.1:chr20:5165577:+	1,14	+
chr2	84668557	84668558	ENSG00000163541.7:ENST00000393868.2:chr2:84668557:-	1,4	-
chr4	103720575	103720576	ENSG00000109332.15:ENST00000394801.4:chr4:103720575:-	1,35	-
chr5	171661301	171661302	ENSG00000168246.5:ENST00000393792.2:chr5:171661301:-	1,10	-
chr12	56532754	56532755	ENSG00000139641.8:ENST00000394048.5:chr12:56532754:+	1,40	+
chr15	91485780	91485781	ENSG00000140553.12:ENST00000394275.2:chr15:91485780:+	1,17	+
chr17	38191472	38191473	ENSG00000008838.13:ENST00000394128.2:chr17:38191472:-	1,38	-
chr17	38191601	38191602	ENSG00000008838.13:ENST00000394128.2:chr17:38191601:-	1,38	-
chr17	38188948	38188949	ENSG00000008838.13:ENST00000394128.2:chr17:38188948:-	1,38	-
chr17	40120136	40120137	ENSG00000173786.12:ENST00000393892.3:chr17:40120136:+	1,56	+
chr17	40120633	40120634	ENSG00000173786.12:ENST00000393892.3:chr17:40120633:+	1,56	+
chr17	40120687	40120688	ENSG00000173786.12:ENST00000393892.3:chr17:40120687:+	1,56	+
chr4	2967080	2967081	ENSG00000125388.15:ENST00000503518.2:chr4:2967080:+	1,2	+
chr4	155470027	155470028	ENSG00000171566.7:ENST00000499023.2:chr4:155470027:-	1,31	-
chr13	98637715	98637716	ENSG00000065150.14:ENST00000490680.1:chr13:98637715:+	1,10	+
chr1	43394655	43394656	ENSG00000117394.15:ENST00000426263.3:chr1:43394655:-	1,32	-
chr2	8934106	8934107	ENSG00000134313.10:ENST00000427284.1:chr2:8934106:-	1,20	-
chr3	179301145	179301146	ENSG00000136518.12:ENST00000429709.2:chr3:179301145:+	1,71	+
chr3	179305792	179305793	ENSG00000136518.12:ENST00000429709.2:chr3:179305792:+	1,71	+
chr3	183904051	183904052	ENSG00000161204.7:ENST00000429586.2:chr3:183904051:+	1,16	+
chr11	107381652	107381653	ENSG00000137760.10:ENST00000428149.2:chr11:107381652:-	2,4	-
chr12	44926384	44926385	ENSG00000184613.6:ENST00000429094.2:chr12:44926384:-	1,13	-
chr12	124116932	124116933	ENSG00000111361.8:ENST00000424014.2:chr12:124116932:-	1,77	-
chr14	20823070	20823071	ENSG00000129484.9:ENST00000429687.3:chr14:20823070:+	1,16	+
chr15	79187188	79187189	ENSG00000185787.10:ENST00000426013.2:chr15:79187188:+	1,85	+
chr15	84233921	84233922	ENSG00000140600.12:ENST00000427482.2:chr15:84233921:+	1,3	+
chr17	42964103	42964104	ENSG00000108883.8:ENST00000426333.2:chr17:42964103:-	1136	-
chr17	42949878	42949879	ENSG00000108883.8:ENST00000426333.2:chr17:42949878:-	1137	-
chr17	61903994	61903995	ENSG00000108592.12:ENST00000427159.2:chr17:61903994:-	1,49	-
chr17	61902641	61902642	ENSG00000108592.12:ENST00000427159.2:chr17:61902641:-	1,52	-
chr17	61902737	61902738	ENSG00000108592.12:ENST00000427159.2:chr17:61902737:-	1,51	-
chr17	61898206	61898207	ENSG00000108592.12:ENST00000427159.2:chr17:61898206:-	1,52	-
chr1	29063643	29063644	ENSG00000198492.10:ENST00000373812.3:chr1:29063643:+	1189	+
chr1	29063647	29063648	ENSG00000198492.10:ENST00000373812.3:chr1:29063647:+	1189	+
chr1	29069011	29069012	ENSG00000198492.10:ENST00000373812.3:chr1:29069011:+	1189	+
chr1	45226049	45226050	ENSG00000142945.8:ENST00000372224.4:chr1:45226049:+	1,48	+
chr1	63307116	63307117	ENSG00000125703.10:ENST00000371120.3:chr1:63307116:+	1,18	+
chr1	67895979	67895980	ENSG00000142864.10:ENST00000370995.2:chr1:67895979:-	1152	-
chr1	67890601	67890602	ENSG00000142864.10:ENST00000370995.2:chr1:67890601:-	1160	-
chr1	67880926	67880927	ENSG00000142864.10:ENST00000370995.2:chr1:67880926:-	1161	-
chr1	71542509	71542510	ENSG00000132485.8:ENST00000370920.3:chr1:71542509:-	1,59	-
chr6	42583742	42583743	ENSG00000024048.6:ENST00000372901.1:chr6:42583742:+	1,10	+
chr9	116041391	116041392	ENSG00000136875.8:ENST00000374199.4:chr9:116041391:+	1,52	+
chr9	116045756	116045757	ENSG00000136875.8:ENST00000374199.4:chr9:116045756:+	1,52	+
chr9	119461451	119461452	ENSG00000119401.10:ENST00000373983.2:chr9:119461451:+	1,11	+
chr9	131670900	131670901	ENSG00000136802.7:ENST00000372600.4:chr9:131670900:+	3,12	+
chr9	135470418	135470419	ENSG00000125485.13:ENST00000372159.3:chr9:135470418:-	1,16	-
chr9	135919196	135919197	ENSG00000148308.13:ENST00000372108.5:chr9:135919196:+	1,6	+
chr10	58118465	58118466	ENSG00000122952.12:ENST00000373944.3:chr10:58118465:-	1115	-
chr20	34832802	34832803	ENSG00000131043.7:ENST00000373932.3:chr20:34832802:+	1,8	+
chr20	47835972	47835973	ENSG00000124228.10:ENST00000371764.4:chr20:47835972:+	1,52	+
chr20	57243121	57243122	ENSG00000124222.17:ENST00000371141.4:chr20:57243121:+	1,18	+
chrX	77369322	77369323	ENSG00000102144.9:ENST00000373316.4:chrX:77369322:+	1495	+
chrX	77380386	77380387	ENSG00000102144.9:ENST00000373316.4:chrX:77380386:+	1499	+
chrX	77380407	77380408	ENSG00000102144.9:ENST00000373316.4:chrX:77380407:+	1499	+
chrX	119694221	119694222	ENSG00000158290.12:ENST00000371322.5:chrX:119694221:-	1,11	-
chr1	24112832	24112833	ENSG00000057757.5:ENST00000246151.4:chr1:24112832:+	1,26	+
chr1	160302298	160302299	ENSG00000122218.10:ENST00000241704.7:chr1:160302298:-	1166	-
chr1	160282897	160282898	ENSG00000122218.10:ENST00000241704.7:chr1:160282897:-	1173	-
chr1	160281806	160281807	ENSG00000122218.10:ENST00000241704.7:chr1:160281806:-	1174	-
chr1	160276199	160276200	ENSG00000122218.10:ENST00000241704.7:chr1:160276199:-	1176	-
chr1	160268906	160268907	ENSG00000122218.10:ENST00000241704.7:chr1:160268906:-	1177	-
chr1	160268975	160268976	ENSG00000122218.10:ENST00000241704.7:chr1:160268975:-	1177	-
chr1	160267383	160267384	ENSG00000122218.10:ENST00000241704.7:chr1:160267383:-	1177	-
chr1	160264343	160264344	ENSG00000122218.10:ENST00000241704.7:chr1:160264343:-	1177	-
chr1	160262974	160262975	ENSG00000122218.10:ENST00000241704.7:chr1:160262974:-	1177	-
chr1	160261856	160261857	ENSG00000122218.10:ENST00000241704.7:chr1:160261856:-	1177	-
chr2	71366989	71366990	ENSG00000124383.4:ENST00000244230.2:chr2:71366989:+	1,47	+
chr2	114483070	114483071	ENSG00000115084.8:ENST00000245680.2:chr2:114483070:-	1,15	-
chr2	152330492	152330493	ENSG00000080345.13:ENST00000243326.5:chr2:152330492:+	1,4	+
chr3	100451435	100451436	ENSG00000114354.8:ENST00000240851.4:chr3:100451435:+	1,56	+
chr3	100451444	100451445	ENSG00000114354.8:ENST00000240851.4:chr3:100451444:+	1,56	+
chr3	113442832	113442833	ENSG00000121579.8:ENST00000240922.3:chr3:113442832:-	1272	-
chr3	127783748	127783749	ENSG00000058262.5:ENST00000243253.3:chr3:127783748:+	2148	+
chr3	164906574	164906575	ENSG00000121871.3:ENST00000241274.3:chr3:164906574:-	1,2	-
chr5	74879214	74879215	ENSG00000122008.11:ENST00000241436.4:chr5:74879214:+	1,19	+
chr13	98086803	98086804	ENSG00000125249.6:ENST00000245304.4:chr13:98086803:+	1,2	+
chr16	3713557	3713558	ENSG00000126602.6:ENST00000246957.5:chr16:3713557:-	1158	-
chr16	56519601	56519602	ENSG00000125124.7:ENST00000245157.5:chr16:56519601:-	1,25	-
chr16	58757793	58757794	ENSG00000125166.8:ENST00000245206.5:chr16:58757793:-	1120	-
chr16	58756180	58756181	ENSG00000125166.8:ENST00000245206.5:chr16:58756180:-	1120	-
chr16	58743427	58743428	ENSG00000125166.8:ENST00000245206.5:chr16:58743427:-	1123	-
chr19	31769288	31769289	ENSG00000121297.6:ENST00000240587.4:chr19:31769288:-	1,2	-
chr19	33882354	33882355	ENSG00000124299.9:ENST00000244137.7:chr19:33882354:-	1,45	-
chr19	33878837	33878838	ENSG00000124299.9:ENST00000244137.7:chr19:33878837:-	1,45	-
chr19	34935931	34935932	ENSG00000126261.8:ENST00000246548.4:chr19:34935931:+	1,69	+
chr19	34942974	34942975	ENSG00000126261.8:ENST00000246548.4:chr19:34942974:+	2,69	+
chr19	34949725	34949726	ENSG00000126261.8:ENST00000246548.4:chr19:34949725:+	1,69	+
chr19	34955001	34955002	ENSG00000126261.8:ENST00000246548.4:chr19:34955001:+	1,69	+
chr19	34957872	34957873	ENSG00000126261.8:ENST00000246548.4:chr19:34957872:+	1,69	+
chr20	1108148	1108149	ENSG00000125818.13:ENST00000246015.4:chr20:1108148:+	1,10	+
chr1	10523179	10523180	ENSG00000160049.7:ENST00000377038.3:chr1:10523179:-	1,9	-
chr1	16095038	16095039	ENSG00000162458.8:ENST00000375766.3:chr1:16095038:+	1,5	+
chr6	30459369	30459370	ENSG00000204592.5:ENST00000376630.4:chr6:30459369:+	1,2	+
chr9	77632242	77632243	ENSG00000156017.8:ENST00000376834.3:chr9:77632242:-	1,47	-
chr9	77613563	77613564	ENSG00000156017.8:ENST00000376834.3:chr9:77613563:-	1,48	-
chr9	80919734	80919735	ENSG00000135069.9:ENST00000376588.3:chr9:80919734:+	1145	+
chr9	80943012	80943013	ENSG00000135069.9:ENST00000376588.3:chr9:80943012:+	1146	+
chr9	86276788	86276789	ENSG00000135018.9:ENST00000376395.4:chr9:86276788:-	1,35	-
chr9	86593135	86593136	ENSG00000165119.14:ENST00000376281.4:chr9:86593135:-	1,87	-
chr9	86587833	86587834	ENSG00000165119.14:ENST00000376281.4:chr9:86587833:-	1,87	-
chr9	86586952	86586953	ENSG00000165119.14:ENST00000376281.4:chr9:86586952:-	1,87	-
chr10	25312367	25312368	ENSG00000185875.8:ENST00000376356.4:chr10:25312367:+	1,13	+
chr10	27066058	27066059	ENSG00000136754.12:ENST00000376160.1:chr10:27066058:-	1,3	-
chr10	27454417	27454418	ENSG00000120539.10:ENST00000375940.4:chr10:27454417:+	1,6	+
chr11	103157102	103157103	ENSG00000187240.9:ENST00000375735.2:chr11:103157102:+	1,9	+
chr20	30904560	30904561	ENSG00000101350.6:ENST00000375712.3:chr20:30904560:+	1,16	+
chr20	31024385	31024386	ENSG00000171456.12:ENST00000375687.4:chr20:31024385:+	1,4	+
chrX	47424203	47424204	ENSG00000078061.8:ENST00000377045.4:chrX:47424203:+	1,13	+
chrX	48558705	48558706	ENSG00000101945.12:ENST00000376687.3:chrX:48558705:+	1,20	+
chrX	49099773	49099774	ENSG00000101997.8:ENST00000376227.3:chrX:49099773:+	1,9	+
chr1	53675807	53675808	ENSG00000157184.5:ENST00000371486.3:chr1:53675807:+	1,21	+
chr1	55330980	55330981	ENSG00000116133.7:ENST00000371269.3:chr1:55330980:-	1,81	-
chr1	55331028	55331029	ENSG00000116133.7:ENST00000371269.3:chr1:55331028:-	1,81	-
chr1	57171874	57171875	ENSG00000162409.6:ENST00000371244.4:chr1:57171874:+	1,12	+
chr1	59248415	59248416	ENSG00000177606.5:ENST00000371222.2:chr1:59248415:-	1,89	-
chr1	63879799	63879800	ENSG00000088035.11:ENST00000371108.4:chr1:63879799:+	1,19	+
chr1	64059260	64059261	ENSG00000079739.11:ENST00000371084.3:chr1:64059260:+	1,24	+
chr1	70654814	70654815	ENSG00000066557.5:ENST00000370952.3:chr1:70654814:-	1,38	-
chr1	70618140	70618141	ENSG00000066557.5:ENST00000370952.3:chr1:70618140:-	1,38	-
chr1	76198602	76198603	ENSG00000117054.9:ENST00000370841.4:chr1:76198602:+	1,84	+
chr1	77685010	77685011	ENSG00000142892.10:ENST00000370812.3:chr1:77685010:-	1,63	-
chr1	78433340	78433341	ENSG00000162613.12:ENST00000370768.2:chr1:78433340:-	1,50	-
chr1	89279310	89279311	ENSG00000065243.14:ENST00000370521.3:chr1:89279310:+	1,40	+
chr1	89298436	89298437	ENSG00000065243.14:ENST00000370521.3:chr1:89298436:+	1,40	+
chr10	97380916	97380917	ENSG00000059573.4:ENST00000371224.2:chr10:97380916:-	1144	-
chr10	97376363	97376364	ENSG00000059573.4:ENST00000371224.2:chr10:97376363:-	1144	-
chr10	97373747	97373748	ENSG00000059573.4:ENST00000371224.2:chr10:97373747:-	1144	-
chr10	97373748	97373749	ENSG00000059573.4:ENST00000371224.2:chr10:97373748:-	1144	-
chr10	99148097	99148098	ENSG00000052749.9:ENST00000370992.4:chr10:99148097:-	1,28	-
chr10	99141169	99141170	ENSG00000052749.9:ENST00000370992.4:chr10:99141169:-	1,28	-
chrX	119394817	119394818	ENSG00000125355.11:ENST00000371369.4:chrX:119394817:-	1,8	-
chrX	128638718	128638719	ENSG00000102038.11:ENST00000371123.1:chrX:128638718:-	1,4	-
chrX	132887870	132887871	ENSG00000147257.9:ENST00000370818.3:chrX:132887870:-	1,67	-
chr1	150471431	150471432	ENSG00000143374.10:ENST00000606933.1:chr1:150471431:+	1,8	+
chr12	123812064	123812065	ENSG00000139697.7:ENST00000602750.1:chr12:123812064:-	1,24	-
chr1	6387468	6387469	ENSG00000097021.15:ENST00000361521.4:chr1:6387468:-	1,8	-
chr1	160182985	160182986	ENSG00000162734.8:ENST00000360472.4:chr1:160182985:+	1,51	+
chr2	69556524	69556525	ENSG00000198380.8:ENST00000361060.5:chr2:69556524:-	1,26	-
chr2	183860445	183860446	ENSG00000061676.10:ENST00000361354.4:chr2:183860445:-	1,48	-
chr7	116550327	116550328	ENSG00000198898.8:ENST00000361183.3:chr7:116550327:+	1,98	+
chr9	34125088	34125089	ENSG00000198876.8:ENST00000361264.4:chr9:34125088:-	1,77	-
chr9	34098339	34098340	ENSG00000198876.8:ENST00000361264.4:chr9:34098339:-	1,81	-
chr9	72913032	72913033	ENSG00000198887.7:ENST00000361138.5:chr9:72913032:+	1,7	+
chr9	133942561	133942562	ENSG00000050555.13:ENST00000361069.4:chr9:133942561:+	1,2	+
chr9	133946895	133946896	ENSG00000050555.13:ENST00000361069.4:chr9:133946895:+	1,2	+
chr10	1042050	1042051	ENSG00000107937.14:ENST00000360803.4:chr10:1042050:+	1186	+
chr10	1046766	1046767	ENSG00000107937.14:ENST00000360803.4:chr10:1046766:+	1186	+
chr10	1061720	1061721	ENSG00000107937.14:ENST00000360803.4:chr10:1061720:+	1162	+
chr10	74326514	74326515	ENSG00000107745.12:ENST00000361114.5:chr10:74326514:-	1,61	-
chr10	74167695	74167696	ENSG00000107745.12:ENST00000361114.5:chr10:74167695:-	1,62	-
chr10	103547179	103547180	ENSG00000198408.9:ENST00000361464.3:chr10:103547179:-	1,36	-
chr11	10785946	10785947	ENSG00000198730.3:ENST00000361367.2:chr11:10785946:+	1141	+
chr11	10789413	10789414	ENSG00000198730.3:ENST00000361367.2:chr11:10789413:+	1142	+
chr11	10794199	10794200	ENSG00000198730.3:ENST00000361367.2:chr11:10794199:+	1145	+
chr13	115089741	115089742	ENSG00000198824.4:ENST00000361283.1:chr13:115089741:+	1,38	+
chr13	115091003	115091004	ENSG00000198824.4:ENST00000361283.1:chr13:115091003:+	1,39	+
chr14	55451551	55451552	ENSG00000198554.7:ENST00000360586.3:chr14:55451551:-	1,28	-
chr17	46990268	46990269	ENSG00000159202.13:ENST00000360943.5:chr17:46990268:+	1,15	+
chr20	34309746	34309747	ENSG00000131051.16:ENST00000361162.6:chr20:34309746:-	1153	-
chr20	34302207	34302208	ENSG00000131051.16:ENST00000361162.6:chr20:34302207:-	1153	-
chr20	34300996	34300997	ENSG00000131051.16:ENST00000361162.6:chr20:34300996:-	1153	-
chr9	89560749	89560750	ENSG00000180447.5:ENST00000298743.7:chr9:89560749:-	1,5	-
chr10	99967925	99967926	ENSG00000166024.9:ENST00000298999.3:chr10:99967925:+	1,3	+
chr10	116734121	116734122	ENSG00000165832.4:ENST00000298746.3:chr10:116734121:+	1,29	+
chr10	127522361	127522362	ENSG00000107949.12:ENST00000299130.3:chr10:127522361:+	1,49	+
chr11	6638004	6638005	ENSG00000166340.10:ENST00000299427.6:chr11:6638004:-	1,27	-
chr11	77838426	77838427	ENSG00000159063.8:ENST00000299626.5:chr11:77838426:-	1,41	-
chr11	77820518	77820519	ENSG00000159063.8:ENST00000299626.5:chr11:77820518:-	1,41	-
chr12	57456969	57456970	ENSG00000166881.5:ENST00000300128.4:chr12:57456969:-	1,40	-
chr12	104325305	104325306	ENSG00000166598.8:ENST00000299767.5:chr12:104325305:+	1654	+
chr12	104325396	104325397	ENSG00000166598.8:ENST00000299767.5:chr12:104325396:+	1659	+
chr12	104326119	104326120	ENSG00000166598.8:ENST00000299767.5:chr12:104326119:+	1661	+
chr12	104326664	104326665	ENSG00000166598.8:ENST00000299767.5:chr12:104326664:+	1664	+
chr12	104327808	104327809	ENSG00000166598.8:ENST00000299767.5:chr12:104327808:+	1668	+
chr12	104327956	104327957	ENSG00000166598.8:ENST00000299767.5:chr12:104327956:+	2674	+
chr12	104328048	104328049	ENSG00000166598.8:ENST00000299767.5:chr12:104328048:+	1674	+
chr12	104333384	104333385	ENSG00000166598.8:ENST00000299767.5:chr12:104333384:+	1675	+
chr12	104335626	104335627	ENSG00000166598.8:ENST00000299767.5:chr12:104335626:+	1676	+
chr12	104336470	104336471	ENSG00000166598.8:ENST00000299767.5:chr12:104336470:+	1680	+
chr12	104336944	104336945	ENSG00000166598.8:ENST00000299767.5:chr12:104336944:+	1676	+
chr12	104337552	104337553	ENSG00000166598.8:ENST00000299767.5:chr12:104337552:+	1673	+
chr12	104337561	104337562	ENSG00000166598.8:ENST00000299767.5:chr12:104337561:+	1673	+
chr12	104337643	104337644	ENSG00000166598.8:ENST00000299767.5:chr12:104337643:+	1673	+
chr12	104340638	104340639	ENSG00000166598.8:ENST00000299767.5:chr12:104340638:+	1668	+
chr14	21971701	21971702	ENSG00000165819.7:ENST00000298717.4:chr14:21971701:-	1,55	-
chr14	35182765	35182766	ENSG00000165410.10:ENST00000298159.6:chr14:35182765:-	1,26	-
chr14	50360726	50360727	ENSG00000165527.5:ENST00000298316.5:chr14:50360726:+	1,24	+
chr14	51446116	51446117	ENSG00000100505.9:ENST00000298355.3:chr14:51446116:-	1,12	-
chr14	76243189	76243190	ENSG00000119685.15:ENST00000298832.9:chr14:76243189:+	1,3	+
chr14	92627515	92627516	ENSG00000165934.8:ENST00000298875.4:chr14:92627515:+	1,36	+
chr14	95670548	95670549	ENSG00000165959.7:ENST00000298912.4:chr14:95670548:-	1,6	-
chr15	52258056	52258057	ENSG00000166477.8:ENST00000299601.5:chr15:52258056:-	1,33	-
chr15	65443212	65443213	ENSG00000166855.5:ENST00000300107.3:chr15:65443212:-	1,12	-
chr16	23701245	23701246	ENSG00000166851.10:ENST00000300093.4:chr16:23701245:+	1,84	+
chr16	46708327	46708328	ENSG00000069329.11:ENST00000299138.7:chr16:46708327:-	1162	-
chr16	46696247	46696248	ENSG00000069329.11:ENST00000299138.7:chr16:46696247:-	1162	-
chr16	46695730	46695731	ENSG00000069329.11:ENST00000299138.7:chr16:46695730:-	1162	-
chr16	50118111	50118112	ENSG00000155393.8:ENST00000299192.7:chr16:50118111:+	1,4	+
chr17	47482556	47482557	ENSG00000167085.7:ENST00000300408.3:chr17:47482556:-	1,34	-
chr20	30358152	30358153	ENSG00000088325.11:ENST00000300403.6:chr20:30358152:+	1,97	+
chr20	30371586	30371587	ENSG00000088325.11:ENST00000300403.6:chr20:30371586:+	1,97	+
chr20	30380572	30380573	ENSG00000088325.11:ENST00000300403.6:chr20:30380572:+	1,97	+
chrX	133609217	133609218	ENSG00000165704.10:ENST00000298556.7:chrX:133609217:+	1,50	+
chr6	136599176	136599177	ENSG00000029363.11:ENST00000531224.1:chr6:136599176:-	1100	-
chr6	136599248	136599249	ENSG00000029363.11:ENST00000531224.1:chr6:136599248:-	1100	-
chr8	48878747	48878748	ENSG00000104738.12:ENST00000523944.1:chr8:48878747:+	1354	+
chr8	48878757	48878758	ENSG00000104738.12:ENST00000523944.1:chr8:48878757:+	1354	+
chr8	48882361	48882362	ENSG00000104738.12:ENST00000523944.1:chr8:48882361:+	1354	+
chr8	48883231	48883232	ENSG00000104738.12:ENST00000523944.1:chr8:48883231:+	1354	+
chr8	48883322	48883323	ENSG00000104738.12:ENST00000523944.1:chr8:48883322:+	1354	+
chr8	48883954	48883955	ENSG00000104738.12:ENST00000523944.1:chr8:48883954:+	1349	+
chr8	48887471	48887472	ENSG00000104738.12:ENST00000523944.1:chr8:48887471:+	1354	+
chr8	48887507	48887508	ENSG00000104738.12:ENST00000523944.1:chr8:48887507:+	1354	+
chr8	48889322	48889323	ENSG00000104738.12:ENST00000523944.1:chr8:48889322:+	1353	+
chr8	110588010	110588011	ENSG00000147642.12:ENST00000533065.1:chr8:110588010:-	1,3	-
chr11	32616515	32616516	ENSG00000149100.8:ENST00000531120.1:chr11:32616515:+	3,72	+
chr11	46837794	46837795	ENSG00000175216.10:ENST00000529230.1:chr11:46837794:-	1,48	-
chr11	46837818	46837819	ENSG00000175216.10:ENST00000529230.1:chr11:46837818:-	1,48	-
chr11	46810292	46810293	ENSG00000175216.10:ENST00000529230.1:chr11:46810292:-	1,56	-
chr11	46799724	46799725	ENSG00000175216.10:ENST00000529230.1:chr11:46799724:-	1,62	-
chr11	65107984	65107985	ENSG00000133884.5:ENST00000528416.1:chr11:65107984:+	1,26	+
chr11	107686538	107686539	ENSG00000110660.10:ENST00000525815.1:chr11:107686538:-	1,37	-
chr11	117031879	117031880	ENSG00000168092.9:ENST00000527958.1:chr11:117031879:+	1,42	+
chr17	77081349	77081350	ENSG00000167280.12:ENST00000579016.1:chr17:77081349:+	1,1	+
chr17	79479117	79479118	ENSG00000184009.5:ENST00000576544.1:chr17:79479117:-	1419	-
chr17	79479132	79479133	ENSG00000184009.5:ENST00000576544.1:chr17:79479132:-	1416	-
chr17	79478224	79478225	ENSG00000184009.5:ENST00000576544.1:chr17:79478224:-	1422	-
chr17	79478369	79478370	ENSG00000184009.5:ENST00000576544.1:chr17:79478369:-	1423	-
chr17	79477744	79477745	ENSG00000184009.5:ENST00000576544.1:chr17:79477744:-	1423	-
chr19	902122	902123	ENSG00000198858.5:ENST00000589428.1:chr19:902122:-	1,1	-
chr19	37130067	37130068	ENSG00000197808.7:ENST00000588268.1:chr19:37130067:-	1,1	-
chr19	50358231	50358232	ENSG00000104960.11:ENST00000599732.1:chr19:50358231:+	1,13	+
chr1	118492711	118492712	ENSG00000065183.11:ENST00000349139.5:chr1:118492711:+	1,51	+
chr1	118496648	118496649	ENSG00000065183.11:ENST00000349139.5:chr1:118496648:+	1,51	+
chr3	9743630	9743631	ENSG00000163719.14:ENST00000351233.5:chr3:9743630:+	1,5	+
chr7	98997999	98998000	ENSG00000106244.8:ENST00000350498.3:chr7:98997999:-	1,11	-
chr7	99506356	99506357	ENSG00000146833.11:ENST00000349062.2:chr7:99506356:-	1,20	-
chr8	103840879	103840880	ENSG00000155096.9:ENST00000347770.4:chr8:103840879:-	1,7	-
chr8	145623752	145623753	ENSG00000071894.10:ENST00000349769.3:chr8:145623752:-	1,9	-
chr10	96313907	96313908	ENSG00000119969.10:ENST00000348459.5:chr10:96313907:+	1,17	+
chr10	113928204	113928205	ENSG00000119927.9:ENST00000348367.4:chr10:113928204:-	1,30	-
chr11	61578502	61578503	ENSG00000149485.12:ENST00000350997.7:chr11:61578502:-	1,38	-
chr12	112915491	112915492	ENSG00000179295.11:ENST00000351677.2:chr12:112915491:+	1,50	+
chr12	112915793	112915794	ENSG00000179295.11:ENST00000351677.2:chr12:112915793:+	1,51	+
chr19	804177	804178	ENSG00000011304.12:ENST00000349038.4:chr19:804177:+	1,53	+
chr20	35293644	35293645	ENSG00000101079.16:ENST00000349004.1:chr20:35293644:-	1,16	-
chr21	27347404	27347405	ENSG00000142192.16:ENST00000348990.5:chr21:27347404:-	1,2	-
chr21	45736391	45736392	ENSG00000141959.12:ENST00000349048.4:chr21:45736391:+	1,46	+
chr22	20079100	20079101	ENSG00000128191.9:ENST00000351989.3:chr22:20079100:+	1,11	+
chr22	43023364	43023365	ENSG00000100243.16:ENST00000352397.5:chr22:43023364:-	1,53	-
chr22	43023366	43023367	ENSG00000100243.16:ENST00000352397.5:chr22:43023366:-	1,53	-
chr22	44385105	44385106	ENSG00000100347.10:ENST00000350028.4:chr22:44385105:+	1,16	+
chr2	190660586	190660587	ENSG00000064933.12:ENST00000441310.2:chr2:190660586:+	1,31	+
chr5	79950236	79950237	ENSG00000228716.2:ENST00000439211.2:chr5:79950236:-	1132	-
chr5	79924935	79924936	ENSG00000228716.2:ENST00000439211.2:chr5:79924935:-	1135	-
chr5	153429410	153429411	ENSG00000037749.7:ENST00000436816.1:chr5:153429410:+	1,38	+
chr10	99219938	99219939	ENSG00000155229.16:ENST00000438925.2:chr10:99219938:-	1,11	-
chr12	56713519	56713520	ENSG00000135473.10:ENST00000440411.3:chr12:56713519:-	1,3	-
chr19	3532538	3532539	ENSG00000105325.9:ENST00000441788.2:chr19:3532538:+	1,21	+
chr1	110169875	110169876	ENSG00000116337.11:ENST00000342115.4:chr1:110169875:+	1,14	+
chr1	115282404	115282405	ENSG00000009307.11:ENST00000339438.6:chr1:115282404:-	1663	-
chr1	115282414	115282415	ENSG00000009307.11:ENST00000339438.6:chr1:115282414:-	1662	-
chr1	115280605	115280606	ENSG00000009307.11:ENST00000339438.6:chr1:115280605:-	1662	-
chr1	115280641	115280642	ENSG00000009307.11:ENST00000339438.6:chr1:115280641:-	1664	-
chr1	115275296	115275297	ENSG00000009307.11:ENST00000339438.6:chr1:115275296:-	1664	-
chr1	115275301	115275302	ENSG00000009307.11:ENST00000339438.6:chr1:115275301:-	1664	-
chr1	115275394	115275395	ENSG00000009307.11:ENST00000339438.6:chr1:115275394:-	1664	-
chr1	115273164	115273165	ENSG00000009307.11:ENST00000339438.6:chr1:115273164:-	1664	-
chr1	115273029	115273030	ENSG00000009307.11:ENST00000339438.6:chr1:115273029:-	1664	-
chr1	115268926	115268927	ENSG00000009307.11:ENST00000339438.6:chr1:115268926:-	1664	-
chr1	115268946	115268947	ENSG00000009307.11:ENST00000339438.6:chr1:115268946:-	1664	-
chr1	115267899	115267900	ENSG00000009307.11:ENST00000339438.6:chr1:115267899:-	1664	-
chr1	115266583	115266584	ENSG00000009307.11:ENST00000339438.6:chr1:115266583:-	1664	-
chr1	115262357	115262358	ENSG00000009307.11:ENST00000339438.6:chr1:115262357:-	1664	-
chr1	115261359	115261360	ENSG00000009307.11:ENST00000339438.6:chr1:115261359:-	1664	-
chr1	145355839	145355840	ENSG00000163386.16:ENST00000342960.5:chr1:145355839:+	1,2	+
chr1	226109269	226109270	ENSG00000143811.12:ENST00000343818.6:chr1:226109269:-	1,42	-
chr2	74058053	74058054	ENSG00000124356.11:ENST00000339566.3:chr2:74058053:+	1,7	+
chr3	184039283	184039284	ENSG00000114867.15:ENST00000346169.2:chr3:184039283:+	1,61	+
chr3	184042683	184042684	ENSG00000114867.15:ENST00000346169.2:chr3:184042683:+	1,60	+
chr3	184042860	184042861	ENSG00000114867.15:ENST00000346169.2:chr3:184042860:+	1,60	+
chr6	150063662	150063663	ENSG00000120253.9:ENST00000340413.2:chr6:150063662:-	1,4	-
chr7	2581810	2581811	ENSG00000106009.11:ENST00000340611.4:chr7:2581810:-	1,20	-
chr7	40132826	40132827	ENSG00000065883.10:ENST00000340829.5:chr7:40132826:+	1,2	+
chr7	65441129	65441130	ENSG00000169919.12:ENST00000345660.6:chr7:65441129:-	1,23	-
chr7	134346754	134346755	ENSG00000172331.7:ENST00000344924.3:chr7:134346754:+	2,27	+
chr7	138252370	138252371	ENSG00000122779.12:ENST00000343526.4:chr7:138252370:+	1,11	+
chr14	89307423	89307424	ENSG00000165533.14:ENST00000345383.5:chr14:89307423:+	1,12	+
chr19	2137731	2137732	ENSG00000065000.11:ENST00000345016.5:chr19:2137731:-	1133	-
chr19	2130408	2130409	ENSG00000065000.11:ENST00000345016.5:chr19:2130408:-	1133	-
chr19	2123858	2123859	ENSG00000065000.11:ENST00000345016.5:chr19:2123858:-	1133	-
chr19	2116625	2116626	ENSG00000065000.11:ENST00000345016.5:chr19:2116625:-	1133	-
chr19	2114285	2114286	ENSG00000065000.11:ENST00000345016.5:chr19:2114285:-	1133	-
chrX	47433443	47433444	ENSG00000008056.8:ENST00000340666.4:chrX:47433443:-	1,1	-
chr1	52227582	52227583	ENSG00000117859.14:ENST00000371710.3:chr1:52227582:+	1,8	+
chr1	67895772	67895773	ENSG00000142864.10:ENST00000370994.4:chr1:67895772:-	1300	-
chr1	67890623	67890624	ENSG00000142864.10:ENST00000370994.4:chr1:67890623:-	1310	-
chr1	68947182	68947183	ENSG00000024526.12:ENST00000370966.5:chr1:68947182:-	1,75	-
chr1	151212448	151212449	ENSG00000143398.15:ENST00000368890.4:chr1:151212448:+	1,8	+
chr6	35806189	35806190	ENSG00000096063.10:ENST00000373825.2:chr6:35806189:-	1,99	-
chr6	89600214	89600215	ENSG00000111880.11:ENST00000369485.4:chr6:89600214:-	1,28	-
chr6	99850468	99850469	ENSG00000132424.10:ENST00000369239.5:chr6:99850468:-	1,29	-
chr9	134366863	134366864	ENSG00000130723.13:ENST00000357304.4:chr9:134366863:+	1,2	+
chr10	51581270	51581271	ENSG00000138293.15:ENST00000374087.4:chr10:51581270:+	1,82	+
chr10	51582922	51582923	ENSG00000138293.15:ENST00000374087.4:chr10:51582922:+	1,82	+
chr11	57569326	57569327	ENSG00000198561.8:ENST00000358694.6:chr11:57569326:+	1,15	+
chr17	76695030	76695031	ENSG00000108669.12:ENST00000361101.4:chr17:76695030:-	1,19	-
chr22	42018054	42018055	ENSG00000196419.8:ENST00000360079.3:chr22:42018054:+	1382	+
chr22	42018084	42018085	ENSG00000196419.8:ENST00000360079.3:chr22:42018084:+	1382	+
chr22	42024227	42024228	ENSG00000196419.8:ENST00000360079.3:chr22:42024227:+	1382	+
chr22	42049625	42049626	ENSG00000196419.8:ENST00000360079.3:chr22:42049625:+	1382	+
chr22	42053019	42053020	ENSG00000196419.8:ENST00000360079.3:chr22:42053019:+	1382	+
chr22	42054291	42054292	ENSG00000196419.8:ENST00000360079.3:chr22:42054291:+	1382	+
chr22	42057393	42057394	ENSG00000196419.8:ENST00000360079.3:chr22:42057393:+	1382	+
chrX	109459807	109459808	ENSG00000101935.5:ENST00000372059.2:chrX:109459807:-	1,3	-
chr1	212532064	212532065	ENSG00000066027.7:ENST00000261461.2:chr1:212532064:+	5,14	+
chr1	229641891	229641892	ENSG00000069248.9:ENST00000261396.3:chr1:229641891:-	1177	-
chr1	229635470	229635471	ENSG00000069248.9:ENST00000261396.3:chr1:229635470:-	1178	-
chr1	229619817	229619818	ENSG00000069248.9:ENST00000261396.3:chr1:229619817:-	1183	-
chr1	229619818	229619819	ENSG00000069248.9:ENST00000261396.3:chr1:229619818:-	1183	-
chr1	229593941	229593942	ENSG00000069248.9:ENST00000261396.3:chr1:229593941:-	1181	-
chr1	229588370	229588371	ENSG00000069248.9:ENST00000261396.3:chr1:229588370:-	1166	-
chr5	71533867	71533868	ENSG00000113048.12:ENST00000261413.5:chr5:71533867:-	1,67	-
chr5	71519535	71519536	ENSG00000113048.12:ENST00000261413.5:chr5:71519535:-	1,67	-
chr5	74011406	74011407	ENSG00000049860.9:ENST00000261416.7:chr5:74011406:+	1,24	+
chr5	74016993	74016994	ENSG00000049860.9:ENST00000261416.7:chr5:74016993:+	1,24	+
chr5	126113415	126113416	ENSG00000113368.7:ENST00000261366.5:chr5:126113415:+	1,62	+
chr6	17632897	17632898	ENSG00000124789.7:ENST00000262077.2:chr6:17632897:-	1,25	-
chr6	17628920	17628921	ENSG00000124789.7:ENST00000262077.2:chr6:17628920:-	1,28	-
chr6	17616795	17616796	ENSG00000124789.7:ENST00000262077.2:chr6:17616795:-	1,30	-
chr12	53416291	53416292	ENSG00000063046.13:ENST00000262056.9:chr12:53416291:+	1,92	+
chr12	57039659	57039660	ENSG00000110955.4:ENST00000262030.3:chr12:57039659:-	1370	-
chr12	57039088	57039089	ENSG00000110955.4:ENST00000262030.3:chr12:57039088:-	1372	-
chr12	57036483	57036484	ENSG00000110955.4:ENST00000262030.3:chr12:57036483:-	1372	-
chr12	57033902	57033903	ENSG00000110955.4:ENST00000262030.3:chr12:57033902:-	1372	-
chr12	57032959	57032960	ENSG00000110955.4:ENST00000262030.3:chr12:57032959:-	1371	-
chr12	57883327	57883328	ENSG00000166986.8:ENST00000262027.5:chr12:57883327:+	1160	+
chr12	57883750	57883751	ENSG00000166986.8:ENST00000262027.5:chr12:57883750:+	1160	+
chr12	57894205	57894206	ENSG00000166986.8:ENST00000262027.5:chr12:57894205:+	1161	+
chr12	57905544	57905545	ENSG00000166986.8:ENST00000262027.5:chr12:57905544:+	1160	+
chr12	57905627	57905628	ENSG00000166986.8:ENST00000262027.5:chr12:57905627:+	1161	+
chr12	57909000	57909001	ENSG00000166986.8:ENST00000262027.5:chr12:57909000:+	1161	+
chr12	57909079	57909080	ENSG00000166986.8:ENST00000262027.5:chr12:57909079:+	1161	+
chr12	57910094	57910095	ENSG00000166986.8:ENST00000262027.5:chr12:57910094:+	1159	+
chr12	101679584	101679585	ENSG00000120800.4:ENST00000261637.4:chr12:101679584:+	1,19	+
chr12	114296628	114296629	ENSG00000122965.6:ENST00000261741.5:chr12:114296628:-	1,16	-
chr12	114261108	114261109	ENSG00000122965.6:ENST00000261741.5:chr12:114261108:-	1,16	-
chr13	50296669	50296670	ENSG00000102753.5:ENST00000261667.3:chr13:50296669:-	1,50	-
chr14	57741023	57741024	ENSG00000053770.7:ENST00000261558.3:chr14:57741023:+	1,26	+
chr14	57748926	57748927	ENSG00000053770.7:ENST00000261558.3:chr14:57748926:+	1,26	+
chr14	68114837	68114838	ENSG00000081181.3:ENST00000261783.3:chr14:68114837:+	1,14	+
chr14	78187099	78187100	ENSG00000100603.9:ENST00000261531.7:chr14:78187099:-	1,60	-
chr15	65849196	65849197	ENSG00000074696.8:ENST00000261875.5:chr15:65849196:+	1153	+
chr15	67528767	67528768	ENSG00000103591.8:ENST00000261880.5:chr15:67528767:-	1,58	-
chr16	27789225	27789226	ENSG00000047578.8:ENST00000261588.4:chr16:27789225:+	1,3	+
chr16	70310887	70310888	ENSG00000090861.11:ENST00000261772.8:chr16:70310887:-	1,42	-
chr16	70292886	70292887	ENSG00000090861.11:ENST00000261772.8:chr16:70292886:-	1,45	-
chr17	20922459	20922460	ENSG00000124422.7:ENST00000261497.4:chr17:20922459:-	2133	-
chr17	20919182	20919183	ENSG00000124422.7:ENST00000261497.4:chr17:20919182:-	1133	-
chr18	265522	265523	ENSG00000079134.7:ENST00000261600.6:chr18:265522:-	1,15	-
chr18	216523	216524	ENSG00000079134.7:ENST00000261600.6:chr18:216523:-	1,15	-
chr18	215446	215447	ENSG00000079134.7:ENST00000261600.6:chr18:215446:-	1,15	-
chr1	67878908	67878909	ENSG00000142864.10:ENST00000361219.6:chr1:67878908:-	1,63	-
chr5	137507074	137507075	ENSG00000112983.13:ENST00000230901.5:chr5:137507074:-	1,30	-
chr5	137498895	137498896	ENSG00000112983.13:ENST00000230901.5:chr5:137498895:-	1,32	-
chr6	44199816	44199817	ENSG00000112759.12:ENST00000371755.3:chr6:44199816:+	1,27	+
chr11	34093323	34093324	ENSG00000135387.15:ENST00000341394.4:chr11:34093323:+	1,54	+
chr11	34097966	34097967	ENSG00000135387.15:ENST00000341394.4:chr11:34097966:+	1,59	+
chr11	34107641	34107642	ENSG00000135387.15:ENST00000341394.4:chr11:34107641:+	1,60	+
chr11	34107957	34107958	ENSG00000135387.15:ENST00000341394.4:chr11:34107957:+	1,62	+
chr11	34112120	34112121	ENSG00000135387.15:ENST00000341394.4:chr11:34112120:+	1,62	+
chr12	123006817	123006818	ENSG00000111011.13:ENST00000331738.7:chr12:123006817:-	1,22	-
chr14	100826922	100826923	ENSG00000140105.13:ENST00000358655.4:chr14:100826922:-	1,16	-
chr17	40025303	40025304	ENSG00000131473.12:ENST00000353196.1:chr17:40025303:-	1,22	-
chr19	805054	805055	ENSG00000011304.12:ENST00000356948.6:chr19:805054:+	1,94	+
chr19	808663	808664	ENSG00000011304.12:ENST00000356948.6:chr19:808663:+	1,94	+
chr19	47712456	47712457	ENSG00000142230.7:ENST00000270225.7:chr19:47712456:+	1,77	+
chr1	86842003	86842004	ENSG00000122417.11:ENST00000394731.1:chr1:86842003:-	1,1	-
chr2	74756261	74756262	ENSG00000115307.12:ENST00000377526.3:chr2:74756261:-	1,8	-
chr2	198363402	198363403	ENSG00000144381.12:ENST00000388968.3:chr2:198363402:-	1729	-
chr2	198360019	198360020	ENSG00000144381.12:ENST00000388968.3:chr2:198360019:-	1729	-
chr2	198354984	198354985	ENSG00000144381.12:ENST00000388968.3:chr2:198354984:-	2728	-
chr2	198353089	198353090	ENSG00000144381.12:ENST00000388968.3:chr2:198353089:-	1705	-
chr2	198351896	198351897	ENSG00000144381.12:ENST00000388968.3:chr2:198351896:-	1692	-
chr2	242203941	242203942	ENSG00000115677.12:ENST00000391975.1:chr2:242203941:-	1,22	-
chr2	242265431	242265432	ENSG00000168385.13:ENST00000391971.2:chr2:242265431:+	1228	+
chr2	242274598	242274599	ENSG00000168385.13:ENST00000391971.2:chr2:242274598:+	1228	+
chr2	242276865	242276866	ENSG00000168385.13:ENST00000391971.2:chr2:242276865:+	1228	+
chr3	172486852	172486853	ENSG00000114346.9:ENST00000392692.3:chr3:172486852:+	1,38	+
chr5	145849196	145849197	ENSG00000113649.7:ENST00000394421.2:chr5:145849196:+	1,40	+
chr5	145859635	145859636	ENSG00000113649.7:ENST00000394421.2:chr5:145859635:+	1,40	+
chr14	21458395	21458396	ENSG00000165792.13:ENST00000382985.4:chr14:21458395:+	1,3	+
chr14	21462977	21462978	ENSG00000165792.13:ENST00000382985.4:chr14:21462977:+	1,3	+
chr16	19554011	19554012	ENSG00000103540.12:ENST00000381396.5:chr16:19554011:+	1,10	+
chr22	32887121	32887122	ENSG00000100225.13:ENST00000382058.3:chr22:32887121:+	1,4	+
chrX	47038825	47038826	ENSG00000182872.11:ENST00000377604.3:chrX:47038825:+	1,37	+
chrX	47040953	47040954	ENSG00000182872.11:ENST00000377604.3:chrX:47040953:+	1,37	+
chrX	131188748	131188749	ENSG00000134602.11:ENST00000394334.2:chrX:131188748:+	1,56	+
chr2	113496452	113496453	ENSG00000169607.8:ENST00000302450.6:chr2:113496452:-	1,1	-
chr3	58415928	58415929	ENSG00000168291.8:ENST00000302746.6:chr3:58415928:-	1,66	-
chr4	1843298	1843299	ENSG00000168924.10:ENST00000302787.2:chr4:1843298:-	1,56	-
chr4	1821067	1821068	ENSG00000168924.10:ENST00000302787.2:chr4:1821067:-	1,58	-
chr10	32324857	32324858	ENSG00000170759.10:ENST00000302418.4:chr10:32324857:-	1,56	-
chr10	33197369	33197370	ENSG00000150093.14:ENST00000302278.3:chr10:33197369:-	1,67	-
chr11	4142943	4142944	ENSG00000167325.10:ENST00000300738.5:chr11:4142943:+	1190	+
chr11	4143377	4143378	ENSG00000167325.10:ENST00000300738.5:chr11:4143377:+	1190	+
chr11	4148446	4148447	ENSG00000167325.10:ENST00000300738.5:chr11:4148446:+	1190	+
chr11	61100392	61100393	ENSG00000167986.9:ENST00000301764.7:chr11:61100392:-	1239	-
chr11	61096929	61096930	ENSG00000167986.9:ENST00000301764.7:chr11:61096929:-	1244	-
chr11	61097017	61097018	ENSG00000167986.9:ENST00000301764.7:chr11:61097017:-	1243	-
chr11	61093169	61093170	ENSG00000167986.9:ENST00000301764.7:chr11:61093169:-	1246	-
chr11	61090543	61090544	ENSG00000167986.9:ENST00000301764.7:chr11:61090543:-	1261	-
chr11	61089149	61089150	ENSG00000167986.9:ENST00000301764.7:chr11:61089149:-	2265	-
chr11	61083824	61083825	ENSG00000167986.9:ENST00000301764.7:chr11:61083824:-	1267	-
chr11	61081655	61081656	ENSG00000167986.9:ENST00000301764.7:chr11:61081655:-	1272	-
chr11	61077283	61077284	ENSG00000167986.9:ENST00000301764.7:chr11:61077283:-	1279	-
chr11	62123891	62123892	ENSG00000162174.8:ENST00000301776.5:chr11:62123891:+	1,3	+
chr12	49579057	49579058	ENSG00000167552.9:ENST00000301071.7:chr12:49579057:-	1,61	-
chr12	120587833	120587834	ENSG00000089154.6:ENST00000300648.6:chr12:120587833:-	1,10	-
chr16	2745983	2745984	ENSG00000167977.4:ENST00000301738.4:chr16:2745983:+	1,34	+
chr16	2816770	2816771	ENSG00000167978.12:ENST00000301740.8:chr16:2816770:+	1,11	+
chr16	70562815	70562816	ENSG00000189091.8:ENST00000302516.5:chr16:70562815:+	1224	+
chr16	70562890	70562891	ENSG00000189091.8:ENST00000302516.5:chr16:70562890:+	1224	+
chr16	70564797	70564798	ENSG00000189091.8:ENST00000302516.5:chr16:70564797:+	2225	+
chr16	70582310	70582311	ENSG00000189091.8:ENST00000302516.5:chr16:70582310:+	1229	+
chr16	70588375	70588376	ENSG00000189091.8:ENST00000302516.5:chr16:70588375:+	1229	+
chr16	70590087	70590088	ENSG00000189091.8:ENST00000302516.5:chr16:70590087:+	1231	+
chr16	70590797	70590798	ENSG00000189091.8:ENST00000302516.5:chr16:70590797:+	1231	+
chr16	70599044	70599045	ENSG00000189091.8:ENST00000302516.5:chr16:70599044:+	1233	+
chr16	70603036	70603037	ENSG00000189091.8:ENST00000302516.5:chr16:70603036:+	1231	+
chr16	89383399	89383400	ENSG00000167522.10:ENST00000301030.4:chr16:89383399:-	1,18	-
chr17	685490	685491	ENSG00000167699.9:ENST00000301329.6:chr17:685490:-	1,93	-
chr17	663428	663429	ENSG00000167699.9:ENST00000301329.6:chr17:663428:-	1,95	-
chr17	2239374	2239375	ENSG00000167721.6:ENST00000301364.5:chr17:2239374:-	1135	-
chr17	2238578	2238579	ENSG00000167721.6:ENST00000301364.5:chr17:2238578:-	1138	-
chr17	2238593	2238594	ENSG00000167721.6:ENST00000301364.5:chr17:2238593:-	1138	-
chr19	4409621	4409622	ENSG00000167670.11:ENST00000301280.5:chr19:4409621:+	1,28	+
chr19	4409742	4409743	ENSG00000167670.11:ENST00000301280.5:chr19:4409742:+	1,28	+
chr19	4433089	4433090	ENSG00000167670.11:ENST00000301280.5:chr19:4433089:+	1,26	+
chr19	16236317	16236318	ENSG00000167461.7:ENST00000300935.3:chr19:16236317:+	1,57	+
chr1	11140875	11140876	ENSG00000171824.9:ENST00000376936.4:chr1:11140875:-	1,77	-
chr1	25167393	25167394	ENSG00000169504.10:ENST00000374379.4:chr1:25167393:+	1140	+
chr6	33288603	33288604	ENSG00000204209.6:ENST00000374542.5:chr6:33288603:-	1,6	-
chr6	33287212	33287213	ENSG00000204209.6:ENST00000374542.5:chr6:33287212:-	1,6	-
chr10	27400953	27400954	ENSG00000136758.14:ENST00000376016.3:chr10:27400953:-	1,95	-
chr10	27444363	27444364	ENSG00000120539.10:ENST00000375946.4:chr10:27444363:+	1,10	+
chr10	35351983	35351984	ENSG00000108094.10:ENST00000374751.3:chr10:35351983:-	1,21	-
chr13	114277590	114277591	ENSG00000198176.8:ENST00000375370.5:chr13:114277590:+	1,85	+
chr20	18507064	18507065	ENSG00000101310.10:ENST00000377475.3:chr20:18507064:+	1,77	+
chr20	32663799	32663800	ENSG00000125970.7:ENST00000375114.3:chr20:32663799:+	1,1	+
chrX	47060910	47060911	ENSG00000130985.12:ENST00000377351.4:chrX:47060910:+	1,81	+
chrX	47065763	47065764	ENSG00000130985.12:ENST00000377351.4:chrX:47065763:+	1,81	+
chrX	47065767	47065768	ENSG00000130985.12:ENST00000377351.4:chrX:47065767:+	1,81	+
chrX	47072501	47072502	ENSG00000130985.12:ENST00000377351.4:chrX:47072501:+	1,81	+
chr1	44134813	44134814	ENSG00000066135.8:ENST00000372396.3:chr1:44134813:+	1,24	+
chr1	45232559	45232560	ENSG00000142945.8:ENST00000372218.4:chr1:45232559:+	1,12	+
chr1	45475248	45475249	ENSG00000126107.10:ENST00000372172.4:chr1:45475248:-	1,14	-
chr1	52520739	52520740	ENSG00000117862.7:ENST00000371626.4:chr1:52520739:-	1,40	-
chr1	52507241	52507242	ENSG00000117862.7:ENST00000371626.4:chr1:52507241:-	1,40	-
chr6	44216370	44216371	ENSG00000096384.15:ENST00000371646.5:chr6:44216370:+	1815	+
chr6	44217114	44217115	ENSG00000096384.15:ENST00000371646.5:chr6:44217114:+	1813	+
chr6	44217115	44217116	ENSG00000096384.15:ENST00000371646.5:chr6:44217115:+	1815	+
chr6	44217144	44217145	ENSG00000096384.15:ENST00000371646.5:chr6:44217144:+	1815	+
chr6	44217427	44217428	ENSG00000096384.15:ENST00000371646.5:chr6:44217427:+	1814	+
chr6	44217464	44217465	ENSG00000096384.15:ENST00000371646.5:chr6:44217464:+	1815	+
chr6	44217548	44217549	ENSG00000096384.15:ENST00000371646.5:chr6:44217548:+	1815	+
chr6	44218786	44218787	ENSG00000096384.15:ENST00000371646.5:chr6:44218786:+	1811	+
chr6	44218818	44218819	ENSG00000096384.15:ENST00000371646.5:chr6:44218818:+	1811	+
chr6	44218845	44218846	ENSG00000096384.15:ENST00000371646.5:chr6:44218845:+	1811	+
chr6	44219204	44219205	ENSG00000096384.15:ENST00000371646.5:chr6:44219204:+	1811	+
chr6	44220799	44220800	ENSG00000096384.15:ENST00000371646.5:chr6:44220799:+	1810	+
chr6	44220806	44220807	ENSG00000096384.15:ENST00000371646.5:chr6:44220806:+	1810	+
chr6	44220811	44220812	ENSG00000096384.15:ENST00000371646.5:chr6:44220811:+	1810	+
chr6	44220812	44220813	ENSG00000096384.15:ENST00000371646.5:chr6:44220812:+	1810	+
chr6	44220903	44220904	ENSG00000096384.15:ENST00000371646.5:chr6:44220903:+	1810	+
chr6	44221050	44221051	ENSG00000096384.15:ENST00000371646.5:chr6:44221050:+	2810	+
chr9	136231721	136231722	ENSG00000148248.9:ENST00000371989.3:chr9:136231721:-	1109	-
chr9	136231741	136231742	ENSG00000148248.9:ENST00000371989.3:chr9:136231741:-	1109	-
chr9	136230430	136230431	ENSG00000148248.9:ENST00000371989.3:chr9:136230430:-	1109	-
chr10	77158747	77158748	ENSG00000165655.14:ENST00000372524.4:chr10:77158747:-	1,85	-
chr10	79760775	79760776	ENSG00000148606.8:ENST00000372371.3:chr10:79760775:-	1,58	-
chr10	79745021	79745022	ENSG00000148606.8:ENST00000372371.3:chr10:79745021:-	1,59	-
chr10	79744041	79744042	ENSG00000148606.8:ENST00000372371.3:chr10:79744041:-	1,59	-
chr10	79739944	79739945	ENSG00000148606.8:ENST00000372371.3:chr10:79739944:-	1,60	-
chr10	85903797	85903798	ENSG00000165678.15:ENST00000372134.3:chr10:85903797:+	1219	+
chr10	85910553	85910554	ENSG00000165678.15:ENST00000372134.3:chr10:85910553:+	1221	+
chr10	89280896	89280897	ENSG00000107789.11:ENST00000371996.4:chr10:89280896:+	1,30	+
chrX	105883896	105883897	ENSG00000147231.9:ENST00000372548.4:chrX:105883896:+	1,69	+
chrX	106888439	106888440	ENSG00000147224.6:ENST00000372435.4:chrX:106888439:+	1199	+
chrX	106890871	106890872	ENSG00000147224.6:ENST00000372435.4:chrX:106890871:+	1199	+
chrX	107978281	107978282	ENSG00000133124.10:ENST00000372129.2:chrX:107978281:-	3,21	-
chrX	117907924	117907925	ENSG00000131724.6:ENST00000371666.3:chrX:117907924:+	1,18	+
chr2	26332720	26332721	ENSG00000084733.6:ENST00000264710.4:chr2:26332720:+	1,82	+
chr2	27560197	27560198	ENSG00000115207.9:ENST00000264720.3:chr2:27560197:-	1,49	-
chr2	27559066	27559067	ENSG00000115207.9:ENST00000264720.3:chr2:27559066:-	1,49	-
chr2	27558846	27558847	ENSG00000115207.9:ENST00000264720.3:chr2:27558846:-	1,49	-
chr2	27549663	27549664	ENSG00000115207.9:ENST00000264720.3:chr2:27549663:-	1,49	-
chr2	203155990	203155991	ENSG00000055044.6:ENST00000264279.5:chr2:203155990:+	1,75	+
chr3	8988943	8988944	ENSG00000070950.5:ENST00000264926.2:chr3:8988943:-	1,23	-
chr3	101311497	101311498	ENSG00000081154.7:ENST00000265260.3:chr3:101311497:+	1143	+
chr3	107938315	107938316	ENSG00000114446.4:ENST00000264538.3:chr3:107938315:-	1,43	-
chr3	131181703	131181704	ENSG00000114686.4:ENST00000264995.3:chr3:131181703:-	1,97	-
chr3	194390739	194390740	ENSG00000041802.6:ENST00000265245.5:chr3:194390739:-	1,28	-
chr4	42077765	42077766	ENSG00000014824.9:ENST00000264451.7:chr4:42077765:+	1,68	+
chr4	57843109	57843110	ENSG00000084092.6:ENST00000264230.4:chr4:57843109:-	1,33	-
chr4	77951953	77951954	ENSG00000138758.7:ENST00000264893.6:chr4:77951953:+	1,97	+
chr4	79522688	79522689	ENSG00000138772.8:ENST00000264908.6:chr4:79522688:+	1,2	+
chr4	178360751	178360752	ENSG00000038002.4:ENST00000264595.2:chr4:178360751:-	1,9	-
chr5	6622135	6622136	ENSG00000037474.10:ENST00000264670.6:chr5:6622135:-	1123	-
chr5	6611907	6611908	ENSG00000037474.10:ENST00000264670.6:chr5:6611907:-	3123	-
chr5	6611071	6611072	ENSG00000037474.10:ENST00000264670.6:chr5:6611071:-	1123	-
chr5	6600174	6600175	ENSG00000037474.10:ENST00000264670.6:chr5:6600174:-	1123	-
chr5	32126486	32126487	ENSG00000113384.9:ENST00000265070.6:chr5:32126486:-	1,40	-
chr5	32444409	32444410	ENSG00000056097.11:ENST00000265069.8:chr5:32444409:-	1,57	-
chr5	32420040	32420041	ENSG00000056097.11:ENST00000265069.8:chr5:32420040:-	1,57	-
chr5	33456315	33456316	ENSG00000113407.9:ENST00000265112.3:chr5:33456315:+	1216	+
chr5	33467013	33467014	ENSG00000113407.9:ENST00000265112.3:chr5:33467013:+	1216	+
chr5	34823912	34823913	ENSG00000039560.9:ENST00000265109.3:chr5:34823912:+	1,34	+
chr5	36629615	36629616	ENSG00000079215.9:ENST00000265113.4:chr5:36629615:+	1,24	+
chr5	36679955	36679956	ENSG00000079215.9:ENST00000265113.4:chr5:36679955:+	1,25	+
chr5	43656783	43656784	ENSG00000112992.12:ENST00000264663.5:chr5:43656783:+	1,21	+
chr5	90678844	90678845	ENSG00000113369.4:ENST00000265138.3:chr5:90678844:-	1,9	-
chr5	169021223	169021224	ENSG00000040275.12:ENST00000265295.4:chr5:169021223:+	1,54	+
chr17	38140589	38140590	ENSG00000108344.10:ENST00000264639.4:chr17:38140589:+	1,52	+
chr17	38151215	38151216	ENSG00000108344.10:ENST00000264639.4:chr17:38151215:+	1,52	+
chr17	38319134	38319135	ENSG00000108349.10:ENST00000264645.7:chr17:38319134:+	1,54	+
chr17	38320389	38320390	ENSG00000108349.10:ENST00000264645.7:chr17:38320389:+	1,55	+
chr17	38324136	38324137	ENSG00000108349.10:ENST00000264645.7:chr17:38324136:+	1,56	+
chr17	38324460	38324461	ENSG00000108349.10:ENST00000264645.7:chr17:38324460:+	1,56	+
chr1	150921899	150921900	ENSG00000143379.8:ENST00000271640.5:chr1:150921899:+	1,2	+
chr1	225611671	225611672	ENSG00000143815.10:ENST00000272163.4:chr1:225611671:-	1164	-
chr1	225611716	225611717	ENSG00000143815.10:ENST00000272163.4:chr1:225611716:-	1164	-
chr1	225609851	225609852	ENSG00000143815.10:ENST00000272163.4:chr1:225609851:-	1164	-
chr1	225600300	225600301	ENSG00000143815.10:ENST00000272163.4:chr1:225600300:-	1166	-
chr1	225598055	225598056	ENSG00000143815.10:ENST00000272163.4:chr1:225598055:-	1167	-
chr1	225592169	225592170	ENSG00000143815.10:ENST00000272163.4:chr1:225592169:-	1167	-
chr1	228285334	228285335	ENSG00000143761.9:ENST00000272102.5:chr1:228285334:+	1213	+
chr2	174945973	174945974	ENSG00000138430.11:ENST00000284719.3:chr2:174945973:-	1,68	-
chr5	10402648	10402649	ENSG00000145495.10:ENST00000274140.5:chr5:10402648:+	2,19	+
chr5	10426582	10426583	ENSG00000145495.10:ENST00000274140.5:chr5:10426582:+	1,22	+
chr5	36163763	36163764	ENSG00000145604.11:ENST00000274255.6:chr5:36163763:+	1,76	+
chr5	36171725	36171726	ENSG00000145604.11:ENST00000274255.6:chr5:36171725:+	1,78	+
chr5	74651262	74651263	ENSG00000113161.11:ENST00000287936.4:chr5:74651262:+	1,36	+
chr5	96506927	96506928	ENSG00000058729.6:ENST00000283109.3:chr5:96506927:-	1,27	-
chr6	79787203	79787204	ENSG00000146247.13:ENST00000275034.4:chr6:79787203:-	1,45	-
chr7	27213497	27213498	ENSG00000253293.3:ENST00000283921.4:chr7:27213497:-	1,36	-
chr7	56125753	56125754	ENSG00000146731.6:ENST00000275603.4:chr7:56125753:+	1412	+
chr7	56126069	56126070	ENSG00000146731.6:ENST00000275603.4:chr7:56126069:+	1412	+
chr7	56127328	56127329	ENSG00000146731.6:ENST00000275603.4:chr7:56127328:+	1411	+
chr7	56128524	56128525	ENSG00000146731.6:ENST00000275603.4:chr7:56128524:+	1411	+
chr7	56130415	56130416	ENSG00000146731.6:ENST00000275603.4:chr7:56130415:+	1411	+
chr7	56130444	56130445	ENSG00000146731.6:ENST00000275603.4:chr7:56130444:+	1410	+
chr9	96326683	96326684	ENSG00000048828.12:ENST00000277165.6:chr9:96326683:+	1,22	+
chr9	106857702	106857703	ENSG00000136824.14:ENST00000286398.7:chr9:106857702:+	1,11	+
chr11	27528294	27528295	ENSG00000148943.7:ENST00000278193.2:chr11:27528294:-	1113	-
chr11	111953562	111953563	ENSG00000150776.13:ENST00000280352.9:chr11:111953562:+	1,2	+
chr17	8480603	8480604	ENSG00000133026.8:ENST00000269243.4:chr17:8480603:-	1105	-
chr17	17168294	17168295	ENSG00000141030.8:ENST00000268717.5:chr17:17168294:-	1,47	-
chr17	57721736	57721737	ENSG00000141367.7:ENST00000269122.3:chr17:57721736:+	1135	+
chr17	57742249	57742250	ENSG00000141367.7:ENST00000269122.3:chr17:57742249:+	1149	+
chr17	57760598	57760599	ENSG00000141367.7:ENST00000269122.3:chr17:57760598:+	1170	+
chr18	29454473	29454474	ENSG00000153339.9:ENST00000283351.4:chr18:29454473:-	1,36	-
chr21	33073310	33073311	ENSG00000156304.10:ENST00000286835.7:chr21:33073310:-	1,21	-
chr21	33067232	33067233	ENSG00000156304.10:ENST00000286835.7:chr21:33067232:-	1,21	-
chrX	70517249	70517250	ENSG00000147140.11:ENST00000276079.8:chrX:70517249:+	1128	+
chrX	70517775	70517776	ENSG00000147140.11:ENST00000276079.8:chrX:70517775:+	1128	+
chr3	12650395	12650396	ENSG00000132155.7:ENST00000251849.4:chr3:12650395:-	1,27	-
chr4	17824693	17824694	ENSG00000109805.5:ENST00000251496.2:chr4:17824693:+	1121	+
chr4	17836122	17836123	ENSG00000109805.5:ENST00000251496.2:chr4:17836122:+	1114	+
chr4	17838913	17838914	ENSG00000109805.5:ENST00000251496.2:chr4:17838913:+	1114	+
chr5	54579389	54579390	ENSG00000067248.5:ENST00000251636.5:chr5:54579389:-	1,11	-
chr5	54570705	54570706	ENSG00000067248.5:ENST00000251636.5:chr5:54570705:-	1,10	-
chr5	54566434	54566435	ENSG00000067248.5:ENST00000251636.5:chr5:54566434:-	1,9	-
chr5	179132839	179132840	ENSG00000127022.10:ENST00000247461.4:chr5:179132839:+	1387	+
chr5	179133279	179133280	ENSG00000127022.10:ENST00000247461.4:chr5:179133279:+	1387	+
chr5	179136947	179136948	ENSG00000127022.10:ENST00000247461.4:chr5:179136947:+	1387	+
chr5	179137000	179137001	ENSG00000127022.10:ENST00000247461.4:chr5:179137000:+	1387	+
chr5	179149873	179149874	ENSG00000127022.10:ENST00000247461.4:chr5:179149873:+	1387	+
chr5	179149913	179149914	ENSG00000127022.10:ENST00000247461.4:chr5:179149913:+	1387	+
chr5	179155631	179155632	ENSG00000127022.10:ENST00000247461.4:chr5:179155631:+	1386	+
chr7	77221522	77221523	ENSG00000127947.11:ENST00000248594.6:chr7:77221522:+	2,2	+
chr7	92119198	92119199	ENSG00000127980.11:ENST00000248633.4:chr7:92119198:-	1,22	-
chr7	128388789	128388790	ENSG00000128595.12:ENST00000249364.4:chr7:128388789:+	1117	+
chr7	128399036	128399037	ENSG00000128595.12:ENST00000249364.4:chr7:128399036:+	1117	+
chr8	103244398	103244399	ENSG00000048392.7:ENST00000251810.3:chr8:103244398:-	1,20	-
chr12	69044225	69044226	ENSG00000127314.13:ENST00000250559.9:chr12:69044225:+	1,32	+
chr14	55643824	55643825	ENSG00000126787.8:ENST00000247191.2:chr14:55643824:-	1105	-
chr14	55643980	55643981	ENSG00000126787.8:ENST00000247191.2:chr14:55643980:-	1103	-
chr15	68468955	68468956	ENSG00000033800.9:ENST00000249636.6:chr15:68468955:+	1,36	+
chr15	68510945	68510946	ENSG00000128973.7:ENST00000249806.5:chr15:68510945:-	1,14	-
chr15	68504191	68504192	ENSG00000128973.7:ENST00000249806.5:chr15:68504191:-	1,14	-
chr16	1748943	1748944	ENSG00000206053.8:ENST00000248098.3:chr16:1748943:+	1173	+
chr16	4409567	4409568	ENSG00000262246.1:ENST00000251166.4:chr16:4409567:-	1,11	-
chr16	77227390	77227391	ENSG00000103111.10:ENST00000248248.3:chr16:77227390:+	1,5	+
chr22	20307288	20307289	ENSG00000128185.5:ENST00000248879.3:chr22:20307288:-	1,2	-
chr22	29182125	29182126	ENSG00000159873.5:ENST00000249064.4:chr22:29182125:+	1125	+
chr22	37962587	37962588	ENSG00000128283.6:ENST00000249014.4:chr22:37962587:+	1,7	+
chrX	18283882	18283883	ENSG00000102098.13:ENST00000251900.4:chrX:18283882:-	1,26	-
chr1	886599	886600	ENSG00000188976.6:ENST00000327044.6:chr1:886599:-	1,81	-
chr1	35944595	35944596	ENSG00000142687.13:ENST00000325722.3:chr1:35944595:-	1,38	-
chr1	35900534	35900535	ENSG00000142687.13:ENST00000325722.3:chr1:35900534:-	1,39	-
chr2	231738263	231738264	ENSG00000135916.11:ENST00000326427.6:chr2:231738263:+	1,6	+
chr3	44879862	44879863	ENSG00000163808.12:ENST00000326047.4:chr3:44879862:+	1,11	+
chr3	98530108	98530109	ENSG00000057019.11:ENST00000326840.6:chr3:98530108:-	1,24	-
chr5	61779851	61779852	ENSG00000086200.12:ENST00000325324.6:chr5:61779851:+	1,58	+
chr6	30545663	30545664	ENSG00000204574.8:ENST00000326195.8:chr6:30545663:+	1,12	+
chr6	42987093	42987094	ENSG00000124702.13:ENST00000326974.4:chr6:42987093:+	1,22	+
chr7	5959561	5959562	ENSG00000122674.8:ENST00000325974.6:chr7:5959561:+	1,55	+
chr9	86616722	86616723	ENSG00000178966.11:ENST00000325875.3:chr9:86616722:+	1,11	+
chr9	111741668	111741669	ENSG00000119326.10:ENST00000325551.4:chr9:111741668:-	1,47	-
chr9	139836596	139836597	ENSG00000159069.9:ENST00000325285.3:chr9:139836596:-	1,5	-
chr9	139836683	139836684	ENSG00000159069.9:ENST00000325285.3:chr9:139836683:-	1,5	-
chr12	32900275	32900276	ENSG00000139131.8:ENST00000324868.8:chr12:32900275:-	1,19	-
chr12	120984378	120984379	ENSG00000022840.11:ENST00000325954.4:chr12:120984378:+	1,62	+
chr13	73467969	73467970	ENSG00000083535.11:ENST00000326291.6:chr13:73467969:+	1,8	+
chr13	88328778	88328779	ENSG00000165300.6:ENST00000325089.6:chr13:88328778:+	1,1	+
chr18	20573538	20573539	ENSG00000101773.12:ENST00000327155.5:chr18:20573538:+	1,22	+
chrX	119388291	119388292	ENSG00000177485.6:ENST00000326624.2:chrX:119388291:+	1,76	+
chr4	122754498	122754499	ENSG00000138686.5:ENST00000506636.1:chr4:122754498:-	1,3	-
chr4	159620185	159620186	ENSG00000171503.7:ENST00000511912.1:chr4:159620185:+	1,15	+
chr5	134705757	134705758	ENSG00000113648.12:ENST00000511689.1:chr5:134705757:-	1,87	-
chr5	134696201	134696202	ENSG00000113648.12:ENST00000511689.1:chr5:134696201:-	1,87	-
chr5	134681742	134681743	ENSG00000113648.12:ENST00000511689.1:chr5:134681742:-	1,87	-
chr5	134670827	134670828	ENSG00000113648.12:ENST00000511689.1:chr5:134670827:-	1,87	-
chr7	66274241	66274242	ENSG00000243335.4:ENST00000510829.2:chr7:66274241:+	1,4	+
chr1	203798631	203798632	ENSG00000058673.11:ENST00000545588.1:chr1:203798631:+	1,5	+
chr5	135508208	135508209	ENSG00000113658.12:ENST00000545620.1:chr5:135508208:+	1,37	+
chr10	34688286	34688287	ENSG00000148498.11:ENST00000545693.1:chr10:34688286:-	1,1	-
chr11	63449181	63449182	ENSG00000133318.9:ENST00000537981.1:chr11:63449181:+	1131	+
chr12	12491477	12491478	ENSG00000111261.9:ENST00000535902.1:chr12:12491477:-	1,9	-
chr12	67691289	67691290	ENSG00000111530.8:ENST00000545606.1:chr12:67691289:+	1177	+
chr12	67696296	67696297	ENSG00000111530.8:ENST00000545606.1:chr12:67696296:+	1188	+
chr12	67699441	67699442	ENSG00000111530.8:ENST00000545606.1:chr12:67699441:+	1192	+
chr12	67699449	67699450	ENSG00000111530.8:ENST00000545606.1:chr12:67699449:+	1192	+
chr12	67699621	67699622	ENSG00000111530.8:ENST00000545606.1:chr12:67699621:+	1192	+
chr12	67699626	67699627	ENSG00000111530.8:ENST00000545606.1:chr12:67699626:+	1192	+
chr12	67699699	67699700	ENSG00000111530.8:ENST00000545606.1:chr12:67699699:+	1192	+
chr12	67699813	67699814	ENSG00000111530.8:ENST00000545606.1:chr12:67699813:+	1192	+
chr12	67700068	67700069	ENSG00000111530.8:ENST00000545606.1:chr12:67700068:+	1192	+
chr12	67700077	67700078	ENSG00000111530.8:ENST00000545606.1:chr12:67700077:+	1191	+
chr12	67703755	67703756	ENSG00000111530.8:ENST00000545606.1:chr12:67703755:+	1195	+
chr12	109999592	109999593	ENSG00000139428.7:ENST00000545712.2:chr12:109999592:-	1,4	-
chrX	117032884	117032885	ENSG00000003096.9:ENST00000540167.1:chrX:117032884:-	1,7	-
chrX	135591301	135591302	ENSG00000102241.7:ENST00000535601.1:chrX:135591301:+	1,69	+
chrX	135593015	135593016	ENSG00000102241.7:ENST00000535601.1:chrX:135593015:+	1,69	+
chr2	73448987	73448988	ENSG00000135632.7:ENST00000389501.4:chr2:73448987:+	1,8	+
chr2	122513390	122513391	ENSG00000211460.7:ENST00000389682.3:chr2:122513390:+	1132	+
chr3	45751030	45751031	ENSG00000211456.6:ENST00000389061.5:chr3:45751030:+	1,59	+
chr3	123219374	123219375	ENSG00000206527.5:ENST00000383657.5:chr3:123219374:-	1,38	-
chr5	150443289	150443290	ENSG00000145901.10:ENST00000389378.2:chr5:150443289:-	1,11	-
chr7	30634598	30634599	ENSG00000106105.9:ENST00000389266.3:chr7:30634598:+	2152	+
chr7	30665903	30665904	ENSG00000106105.9:ENST00000389266.3:chr7:30665903:+	1155	+
chr7	30671111	30671112	ENSG00000106105.9:ENST00000389266.3:chr7:30671111:+	1155	+
chr7	30673428	30673429	ENSG00000106105.9:ENST00000389266.3:chr7:30673428:+	1155	+
chr9	104302617	104302618	ENSG00000155827.7:ENST00000389120.3:chr9:104302617:+	1,41	+
chr9	138709896	138709897	ENSG00000130559.14:ENST00000389532.4:chr9:138709896:-	3,3	-
chr13	73319307	73319308	ENSG00000136122.11:ENST00000390667.5:chr13:73319307:+	1,24	+
chr17	3749450	3749451	ENSG00000074356.12:ENST00000389005.4:chr17:3749450:-	1,10	-
chr17	41345502	41345503	ENSG00000188554.9:ENST00000389312.4:chr17:41345502:+	1,37	+
chr17	41352524	41352525	ENSG00000188554.9:ENST00000389312.4:chr17:41352524:+	1,37	+
chr17	41362003	41362004	ENSG00000188554.9:ENST00000389312.4:chr17:41362003:+	1,37	+
chr21	33719704	33719705	ENSG00000142207.5:ENST00000382751.3:chr21:33719704:-	1,4	-
chr2	17913090	17913091	ENSG00000163029.11:ENST00000351948.4:chr2:17913090:-	1,27	-
chr2	130910253	130910254	ENSG00000136699.15:ENST00000351288.6:chr2:130910253:-	1,36	-
chr3	183700711	183700712	ENSG00000114770.12:ENST00000334444.6:chr3:183700711:-	1,7	-
chr4	103236860	103236861	ENSG00000138821.8:ENST00000356736.4:chr4:103236860:-	1,14	-
chr5	149776111	149776112	ENSG00000070814.13:ENST00000323668.7:chr5:149776111:+	1,9	+
chr7	26236090	26236091	ENSG00000122566.16:ENST00000354667.4:chr7:26236090:-	1162	-
chr8	17824611	17824612	ENSG00000078674.13:ENST00000325083.8:chr8:17824611:+	2,8	+
chr8	37968295	37968296	ENSG00000129691.11:ENST00000343823.6:chr8:37968295:+	1,30	+
chr8	145138350	145138351	ENSG00000197858.6:ENST00000355091.4:chr8:145138350:+	1,18	+
chr8	145140026	145140027	ENSG00000197858.6:ENST00000355091.4:chr8:145140026:+	1,18	+
chr8	145140298	145140299	ENSG00000197858.6:ENST00000355091.4:chr8:145140298:+	1,18	+
chr12	4657304	4657305	ENSG00000111247.10:ENST00000352618.4:chr12:4657304:+	1,41	+
chr12	21788502	21788503	ENSG00000111716.8:ENST00000350669.1:chr12:21788502:-	1421	-
chr14	93170677	93170678	ENSG00000100600.10:ENST00000334869.4:chr14:93170677:-	1,37	-
chr16	4862120	4862121	ENSG00000140632.12:ENST00000321919.9:chr16:4862120:-	1,59	-
chr17	45608734	45608735	ENSG00000141279.11:ENST00000322157.4:chr17:45608734:+	1,47	+
chr17	45668147	45668148	ENSG00000141279.11:ENST00000322157.4:chr17:45668147:+	1,66	+
chr17	45699252	45699253	ENSG00000141279.11:ENST00000322157.4:chr17:45699252:+	1,62	+
chr17	76210774	76210775	ENSG00000089685.10:ENST00000350051.3:chr17:76210774:+	1,85	+
chr17	79478504	79478505	ENSG00000184009.5:ENST00000331925.2:chr17:79478504:-	1122	-
chr17	79477794	79477795	ENSG00000184009.5:ENST00000331925.2:chr17:79477794:-	1126	-
chr17	79477848	79477849	ENSG00000184009.5:ENST00000331925.2:chr17:79477848:-	1126	-
chr19	8531135	8531136	ENSG00000099783.7:ENST00000348943.3:chr19:8531135:+	1,61	+
chr19	8551172	8551173	ENSG00000099783.7:ENST00000348943.3:chr19:8551172:+	1,61	+
chr20	18513343	18513344	ENSG00000101310.10:ENST00000336714.3:chr20:18513343:+	1,54	+
chr2	38809097	38809098	ENSG00000143889.11:ENST00000449105.3:chr2:38809097:-	1,17	-
chr2	86374885	86374886	ENSG00000132305.16:ENST00000449247.2:chr2:86374885:-	1103	-
chr2	86371843	86371844	ENSG00000132305.16:ENST00000449247.2:chr2:86371843:-	1103	-
chr2	211306087	211306088	ENSG00000115365.7:ENST00000450366.2:chr2:211306087:-	1,19	-
chr3	47891579	47891580	ENSG00000132153.10:ENST00000445061.1:chr3:47891579:+	1,12	+
chr3	140682033	140682034	ENSG00000114120.7:ENST00000446041.2:chr3:140682033:+	1,20	+
chr3	140695220	140695221	ENSG00000114120.7:ENST00000446041.2:chr3:140695220:+	1,22	+
chr4	99812473	99812474	ENSG00000151247.8:ENST00000450253.2:chr4:99812473:-	1167	-
chr6	139241413	139241414	ENSG00000135597.14:ENST00000450536.2:chr6:139241413:-	1,22	-
chr7	150068991	150068992	ENSG00000214022.7:ENST00000444957.1:chr7:150068991:+	1,18	+
chr12	121442887	121442888	ENSG00000157895.7:ENST00000445832.3:chr12:121442887:-	1,8	-
chr16	23540921	23540922	ENSG00000103356.11:ENST00000449606.1:chr16:23540921:-	1,26	-
chr17	59946481	59946482	ENSG00000108506.7:ENST00000444766.3:chr17:59946481:-	1,6	-
chr17	74349737	74349738	ENSG00000161542.12:ENST00000446526.3:chr17:74349737:-	1,39	-
chr1	220344275	220344276	ENSG00000118873.11:ENST00000358951.2:chr1:220344275:-	1,35	-
chr2	160136336	160136337	ENSG00000196151.6:ENST00000359774.4:chr2:160136336:-	1,1	-
chr2	196544883	196544884	ENSG00000196950.9:ENST00000359634.5:chr2:196544883:+	1,69	+
chr2	196599695	196599696	ENSG00000196950.9:ENST00000359634.5:chr2:196599695:+	1,67	+
chr3	195794496	195794497	ENSG00000072274.8:ENST00000360110.4:chr3:195794496:-	1160	-
chr3	195792344	195792345	ENSG00000072274.8:ENST00000360110.4:chr3:195792344:-	1160	-
chr3	195792443	195792444	ENSG00000072274.8:ENST00000360110.4:chr3:195792443:-	1160	-
chr3	195782000	195782001	ENSG00000072274.8:ENST00000360110.4:chr3:195782000:-	1160	-
chr5	94857908	94857909	ENSG00000198677.6:ENST00000358746.2:chr5:94857908:-	1,54	-
chr5	94839555	94839556	ENSG00000198677.6:ENST00000358746.2:chr5:94839555:-	1,50	-
chr9	21333550	21333551	ENSG00000198642.5:ENST00000359039.4:chr9:21333550:-	1,59	-
chr9	35066813	35066814	ENSG00000165280.11:ENST00000358901.6:chr9:35066813:-	2436	-
chr9	35063061	35063062	ENSG00000165280.11:ENST00000358901.6:chr9:35063061:-	1442	-
chr9	35062011	35062012	ENSG00000165280.11:ENST00000358901.6:chr9:35062011:-	1451	-
chr9	35060820	35060821	ENSG00000165280.11:ENST00000358901.6:chr9:35060820:-	1455	-
chr9	35060382	35060383	ENSG00000165280.11:ENST00000358901.6:chr9:35060382:-	1455	-
chr9	35057386	35057387	ENSG00000165280.11:ENST00000358901.6:chr9:35057386:-	1450	-
chr9	35057464	35057465	ENSG00000165280.11:ENST00000358901.6:chr9:35057464:-	1450	-
chr9	35057164	35057165	ENSG00000165280.11:ENST00000358901.6:chr9:35057164:-	1449	-
chr9	137020465	137020466	ENSG00000196363.5:ENST00000358625.3:chr9:137020465:+	1,16	+
chr10	71129292	71129293	ENSG00000156515.17:ENST00000359426.6:chr10:71129292:+	1,48	+
chr10	71154818	71154819	ENSG00000156515.17:ENST00000359426.6:chr10:71154818:+	1,47	+
chr14	102500330	102500331	ENSG00000197102.6:ENST00000360184.4:chr14:102500330:+	1,27	+
chr14	102507952	102507953	ENSG00000197102.6:ENST00000360184.4:chr14:102507952:+	1,29	+
chr15	52427945	52427946	ENSG00000069966.14:ENST00000358784.7:chr15:52427945:-	1,3	-
chr16	67913802	67913803	ENSG00000038358.10:ENST00000358933.5:chr16:67913802:+	1,23	+
chr16	67914692	67914693	ENSG00000038358.10:ENST00000358933.5:chr16:67914692:+	1,23	+
chr16	68108033	68108034	ENSG00000167264.13:ENST00000358896.6:chr16:68108033:+	1,4	+
chr2	32735604	32735605	ENSG00000115760.9:ENST00000421745.2:chr2:32735604:+	1,10	+
chr3	48663690	48663691	ENSG00000225697.6:ENST00000420764.2:chr3:48663690:-	1,13	-
chr6	138428457	138428458	ENSG00000112378.11:ENST00000421351.3:chr6:138428457:-	1,28	-
chr7	148876240	148876241	ENSG00000197024.4:ENST00000420008.2:chr7:148876240:+	1,6	+
chr9	96212771	96212772	ENSG00000188938.11:ENST00000423591.1:chr9:96212771:-	1,4	-
chr11	18424428	18424429	ENSG00000134333.9:ENST00000422447.3:chr11:18424428:+	1584	+
chr11	18425306	18425307	ENSG00000134333.9:ENST00000422447.3:chr11:18425306:+	1584	+
chr11	18427031	18427032	ENSG00000134333.9:ENST00000422447.3:chr11:18427031:+	1584	+
chr11	18427048	18427049	ENSG00000134333.9:ENST00000422447.3:chr11:18427048:+	1584	+
chr11	18428666	18428667	ENSG00000134333.9:ENST00000422447.3:chr11:18428666:+	1584	+
chr11	120916510	120916511	ENSG00000154114.8:ENST00000422003.2:chr11:120916510:+	1,3	+
chr12	49075218	49075219	ENSG00000139620.8:ENST00000420613.2:chr12:49075218:-	1,13	-
chr12	53926987	53926988	ENSG00000170653.14:ENST00000420353.2:chr12:53926987:-	1,3	-
chr16	74524907	74524908	ENSG00000090863.7:ENST00000422840.2:chr16:74524907:-	2,41	-
chr17	38572280	38572281	ENSG00000131747.10:ENST00000423485.1:chr17:38572280:-	1297	-
chr17	38569773	38569774	ENSG00000131747.10:ENST00000423485.1:chr17:38569773:-	1299	-
chr17	38567938	38567939	ENSG00000131747.10:ENST00000423485.1:chr17:38567938:-	1303	-
chr17	38564880	38564881	ENSG00000131747.10:ENST00000423485.1:chr17:38564880:-	1305	-
chr17	38562908	38562909	ENSG00000131747.10:ENST00000423485.1:chr17:38562908:-	1311	-
chr17	38557111	38557112	ENSG00000131747.10:ENST00000423485.1:chr17:38557111:-	1310	-
chr17	38556477	38556478	ENSG00000131747.10:ENST00000423485.1:chr17:38556477:-	1308	-
chr17	38555080	38555081	ENSG00000131747.10:ENST00000423485.1:chr17:38555080:-	1299	-
chr17	38548493	38548494	ENSG00000131747.10:ENST00000423485.1:chr17:38548493:-	1,40	-
chrX	19368131	19368132	ENSG00000131828.9:ENST00000422285.2:chrX:19368131:+	1,89	+
chrX	19375772	19375773	ENSG00000131828.9:ENST00000422285.2:chrX:19375772:+	1,89	+
chr1	182354541	182354542	ENSG00000135821.12:ENST00000331872.6:chr1:182354541:-	1,98	-
chr3	49893853	49893854	ENSG00000183763.4:ENST00000331456.2:chr3:49893853:-	1,11	-
chr3	139093383	139093384	ENSG00000184432.5:ENST00000333188.5:chr3:139093383:-	1197	-
chr3	139092170	139092171	ENSG00000184432.5:ENST00000333188.5:chr3:139092170:-	1198	-
chr3	139088380	139088381	ENSG00000184432.5:ENST00000333188.5:chr3:139088380:-	1198	-
chr3	139085950	139085951	ENSG00000184432.5:ENST00000333188.5:chr3:139085950:-	1198	-
chr3	139081304	139081305	ENSG00000184432.5:ENST00000333188.5:chr3:139081304:-	1198	-
chr5	177019637	177019638	ENSG00000184840.7:ENST00000332598.6:chr5:177019637:+	1,52	+
chr5	177020696	177020697	ENSG00000184840.7:ENST00000332598.6:chr5:177020696:+	1,52	+
chr7	5569192	5569193	ENSG00000075624.9:ENST00000331789.5:chr7:5569192:-	1918	-
chr7	5569246	5569247	ENSG00000075624.9:ENST00000331789.5:chr7:5569246:-	1917	-
chr7	5568853	5568854	ENSG00000075624.9:ENST00000331789.5:chr7:5568853:-	1934	-
chr7	5567922	5567923	ENSG00000075624.9:ENST00000331789.5:chr7:5567922:-	1933	-
chr7	5568085	5568086	ENSG00000075624.9:ENST00000331789.5:chr7:5568085:-	2934	-
chr7	5568131	5568132	ENSG00000075624.9:ENST00000331789.5:chr7:5568131:-	1934	-
chr7	5568284	5568285	ENSG00000075624.9:ENST00000331789.5:chr7:5568284:-	1934	-
chr7	5568289	5568290	ENSG00000075624.9:ENST00000331789.5:chr7:5568289:-	1932	-
chr7	5567660	5567661	ENSG00000075624.9:ENST00000331789.5:chr7:5567660:-	1934	-
chr7	5567698	5567699	ENSG00000075624.9:ENST00000331789.5:chr7:5567698:-	1933	-
chr7	5567402	5567403	ENSG00000075624.9:ENST00000331789.5:chr7:5567402:-	1934	-
chr12	64883881	64883882	ENSG00000183735.5:ENST00000331710.5:chr12:64883881:+	1,22	+
chr12	123078912	123078913	ENSG00000184445.7:ENST00000333479.7:chr12:123078912:+	1,4	+
chr14	61924349	61924350	ENSG00000027075.9:ENST00000332981.5:chr14:61924349:+	1,1	+
chr14	94528444	94528445	ENSG00000089737.11:ENST00000330836.5:chr14:94528444:-	1127	-
chr14	94526552	94526553	ENSG00000089737.11:ENST00000330836.5:chr14:94526552:-	1127	-
chr14	99865243	99865244	ENSG00000183576.8:ENST00000331768.5:chr14:99865243:-	1,12	-
chr15	89169488	89169489	ENSG00000181026.13:ENST00000332810.3:chr15:89169488:+	1,91	+
chr16	18554962	18554963	ENSG00000185164.10:ENST00000330537.6:chr16:18554962:-	1,47	-
chr16	18553539	18553540	ENSG00000185164.10:ENST00000330537.6:chr16:18553539:-	1,49	-
chr16	18528549	18528550	ENSG00000185164.10:ENST00000330537.6:chr16:18528549:-	1,52	-
chr16	18524753	18524754	ENSG00000185164.10:ENST00000330537.6:chr16:18524753:-	1,52	-
chr17	66033255	66033256	ENSG00000182481.4:ENST00000330459.3:chr17:66033255:+	1469	+
chr17	66038331	66038332	ENSG00000182481.4:ENST00000330459.3:chr17:66038331:+	1469	+
chr17	66039085	66039086	ENSG00000182481.4:ENST00000330459.3:chr17:66039085:+	1469	+
chr21	40550432	40550433	ENSG00000183527.7:ENST00000331573.3:chr21:40550432:-	1,8	-
chr21	43166849	43166850	ENSG00000183421.7:ENST00000332512.3:chr21:43166849:-	1,8	-
chr22	19422364	19422365	ENSG00000185608.4:ENST00000333130.3:chr22:19422364:+	1,3	+
chr22	31816407	31816408	ENSG00000185721.7:ENST00000331457.4:chr22:31816407:+	1,45	+
chrX	133547976	133547977	ENSG00000156531.12:ENST00000332070.3:chrX:133547976:+	1104	+
chr2	26427010	26427011	ENSG00000084754.6:ENST00000380649.3:chr2:26427010:-	1102	-
chr2	26420581	26420582	ENSG00000084754.6:ENST00000380649.3:chr2:26420581:-	1102	-
chr2	27439734	27439735	ENSG00000138085.12:ENST00000380171.3:chr2:27439734:+	1,7	+
chr6	2785278	2785279	ENSG00000124535.11:ENST00000380773.4:chr6:2785278:+	2,12	+
chr6	10709300	10709301	ENSG00000111845.4:ENST00000379568.3:chr6:10709300:+	1,22	+
chr9	19096673	19096674	ENSG00000147874.6:ENST00000380502.3:chr9:19096673:-	1,42	-
chr9	19058073	19058074	ENSG00000147874.6:ENST00000380502.3:chr9:19058073:-	1,40	-
chr9	20620808	20620809	ENSG00000171843.11:ENST00000380338.4:chr9:20620808:-	1,10	-
chr9	32986001	32986002	ENSG00000137074.14:ENST00000379825.2:chr9:32986001:-	1,1	-
chr10	6186965	6186966	ENSG00000170525.14:ENST00000379789.4:chr10:6186965:+	1,19	+
chr13	34404904	34404905	ENSG00000133119.8:ENST00000380071.3:chr13:34404904:+	1,92	+
chr20	3127627	3127628	ENSG00000215251.3:ENST00000380266.3:chr20:3127627:-	1,39	-
chr20	3129383	3129384	ENSG00000215251.3:ENST00000380266.3:chr20:3129383:-	1,39	-
chrX	12837741	12837742	ENSG00000101911.8:ENST00000380668.5:chrX:12837741:+	1,80	+
chrX	16875739	16875740	ENSG00000102054.13:ENST00000380087.2:chrX:16875739:-	1306	-
chrX	16870916	16870917	ENSG00000102054.13:ENST00000380087.2:chrX:16870916:-	1306	-
chrX	16870960	16870961	ENSG00000102054.13:ENST00000380087.2:chrX:16870960:-	1306	-
chrX	16864054	16864055	ENSG00000102054.13:ENST00000380087.2:chrX:16864054:-	1306	-
chrX	17770073	17770074	ENSG00000047634.10:ENST00000380045.3:chrX:17770073:+	1,14	+
chr2	234201928	234201929	ENSG00000085978.17:ENST00000392017.4:chr2:234201928:+	1,4	+
chr2	242277124	242277125	ENSG00000168385.13:ENST00000391973.2:chr2:242277124:+	1,55	+
chr3	136085857	136085858	ENSG00000118007.8:ENST00000383202.2:chr3:136085857:-	1,34	-
chr4	57860572	57860573	ENSG00000047315.10:ENST00000381227.1:chr4:57860572:+	1,80	+
chr4	57860966	57860967	ENSG00000047315.10:ENST00000381227.1:chr4:57860966:+	1,80	+
chr4	57871595	57871596	ENSG00000047315.10:ENST00000381227.1:chr4:57871595:+	1,78	+
chr4	57871794	57871795	ENSG00000047315.10:ENST00000381227.1:chr4:57871794:+	1,78	+
chr4	57889554	57889555	ENSG00000047315.10:ENST00000381227.1:chr4:57889554:+	1,77	+
chr4	104065638	104065639	ENSG00000138778.7:ENST00000380026.3:chr4:104065638:-	1,6	-
chr6	88318831	88318832	ENSG00000135336.10:ENST00000392844.3:chr6:88318831:+	1,31	+
chr8	17612264	17612265	ENSG00000129422.9:ENST00000381869.3:chr8:17612264:-	1,1	-
chr9	15469018	15469019	ENSG00000164985.10:ENST00000380738.4:chr9:15469018:-	1,11	-
chr9	88655779	88655780	ENSG00000135052.12:ENST00000388712.3:chr9:88655779:-	1,61	-
chr12	121858544	121858545	ENSG00000170633.12:ENST00000392465.3:chr12:121858544:+	1,4	+
chr14	68156946	68156947	ENSG00000072042.8:ENST00000381346.4:chr14:68156946:-	1,65	-
chr15	49085532	49085533	ENSG00000103995.9:ENST00000380950.2:chr15:49085532:-	1,8	-
chr15	49031162	49031163	ENSG00000103995.9:ENST00000380950.2:chr15:49031162:-	1,5	-
chr19	41778059	41778060	ENSG00000105323.12:ENST00000392006.3:chr19:41778059:+	1,51	+
chr20	2841158	2841159	ENSG00000215305.5:ENST00000380445.3:chr20:2841158:+	1,6	+
chr21	40717192	40717193	ENSG00000205581.6:ENST00000380749.5:chr21:40717192:-	2,63	-
chr1	183109603	183109604	ENSG00000135862.5:ENST00000258341.4:chr1:183109603:+	1,29	+
chr2	73466774	73466775	ENSG00000135624.11:ENST00000258091.5:chr2:73466774:+	1138	+
chr2	73478511	73478512	ENSG00000135624.11:ENST00000258091.5:chr2:73478511:+	1138	+
chr2	73479805	73479806	ENSG00000135624.11:ENST00000258091.5:chr2:73479805:+	1138	+
chr5	112178215	112178216	ENSG00000134982.12:ENST00000257430.4:chr5:112178215:+	1,1	+
chr7	6505930	6505931	ENSG00000136240.5:ENST00000258739.4:chr7:6505930:-	1133	-
chr7	45143805	45143806	ENSG00000136270.9:ENST00000258770.3:chr7:45143805:-	2,21	-
chr7	45143831	45143832	ENSG00000136270.9:ENST00000258770.3:chr7:45143831:-	1,21	-
chr7	105205832	105205833	ENSG00000135249.3:ENST00000257700.2:chr7:105205832:+	1,55	+
chr8	82586115	82586116	ENSG00000133731.5:ENST00000256108.5:chr8:82586115:-	1,13	-
chr11	47261741	47261742	ENSG00000134575.5:ENST00000256997.3:chr11:47261741:-	1,15	-
chr12	46764392	46764393	ENSG00000134294.9:ENST00000256689.5:chr12:46764392:-	1142	-
chr12	46754990	46754991	ENSG00000134294.9:ENST00000256689.5:chr12:46754990:-	1149	-
chr12	49722819	49722820	ENSG00000135451.8:ENST00000257909.3:chr12:49722819:+	1,12	+
chr12	49723013	49723014	ENSG00000135451.8:ENST00000257909.3:chr12:49723013:+	1,12	+
chr12	53687159	53687160	ENSG00000135476.7:ENST00000257934.4:chr12:53687159:+	1,6	+
chr14	20768905	20768906	ENSG00000136319.7:ENST00000258821.3:chr14:20768905:-	1,17	-
chr14	20768906	20768907	ENSG00000136319.7:ENST00000258821.3:chr14:20768906:-	1,17	-
chr15	34455807	34455808	ENSG00000134152.6:ENST00000256544.3:chr15:34455807:-	1,13	-
chr16	15961367	15961368	ENSG00000133393.8:ENST00000255759.6:chr16:15961367:-	1,22	-
chr16	67272198	67272199	ENSG00000135723.9:ENST00000258201.4:chr16:67272198:-	1,19	-
chr18	34298386	34298387	ENSG00000134775.11:ENST00000257209.4:chr18:34298386:+	1,3	+
chr18	55278894	55278895	ENSG00000134440.7:ENST00000256854.5:chr18:55278894:-	1,77	-
chr1	117617689	117617690	ENSG00000116830.7:ENST00000369466.4:chr1:117617689:+	1,32	+
chr1	117617739	117617740	ENSG00000116830.7:ENST00000369466.4:chr1:117617739:+	1,32	+
chr1	117632813	117632814	ENSG00000116830.7:ENST00000369466.4:chr1:117632813:+	1,27	+
chr1	144184322	144184323	ENSG00000162825.12:ENST00000369365.3:chr1:144184322:+	1,1	+
chr1	144187604	144187605	ENSG00000162825.12:ENST00000369365.3:chr1:144187604:+	1,1	+
chr1	144192350	144192351	ENSG00000162825.12:ENST00000369365.3:chr1:144192350:+	1,1	+
chr1	144194644	144194645	ENSG00000162825.12:ENST00000369365.3:chr1:144194644:+	1,1	+
chr1	144195505	144195506	ENSG00000162825.12:ENST00000369365.3:chr1:144195505:+	1,1	+
chr1	144197120	144197121	ENSG00000162825.12:ENST00000369365.3:chr1:144197120:+	1,1	+
chr1	144199404	144199405	ENSG00000162825.12:ENST00000369365.3:chr1:144199404:+	1,1	+
chr1	146751820	146751821	ENSG00000131778.13:ENST00000369258.4:chr1:146751820:+	1,45	+
chr1	148325962	148325963	ENSG00000203832.6:ENST00000369202.1:chr1:148325962:-	1,1	-
chr1	148316440	148316441	ENSG00000203832.6:ENST00000369202.1:chr1:148316440:-	1,1	-
chr1	148278257	148278258	ENSG00000203832.6:ENST00000369202.1:chr1:148278257:-	1,1	-
chr1	148275779	148275780	ENSG00000203832.6:ENST00000369202.1:chr1:148275779:-	1,1	-
chr1	148274309	148274310	ENSG00000203832.6:ENST00000369202.1:chr1:148274309:-	1,1	-
chr1	148273495	148273496	ENSG00000203832.6:ENST00000369202.1:chr1:148273495:-	1,1	-
chr1	148271015	148271016	ENSG00000203832.6:ENST00000369202.1:chr1:148271015:-	1,1	-
chr1	148269537	148269538	ENSG00000203832.6:ENST00000369202.1:chr1:148269537:-	1,1	-
chr1	148268723	148268724	ENSG00000203832.6:ENST00000369202.1:chr1:148268723:-	2,2	-
chr1	148263951	148263952	ENSG00000203832.6:ENST00000369202.1:chr1:148263951:-	2,2	-
chr1	148263090	148263091	ENSG00000203832.6:ENST00000369202.1:chr1:148263090:-	2,2	-
chr1	148259147	148259148	ENSG00000203832.6:ENST00000369202.1:chr1:148259147:-	1,4	-
chr1	148254383	148254384	ENSG00000203832.6:ENST00000369202.1:chr1:148254383:-	2,4	-
chr1	148251926	148251927	ENSG00000203832.6:ENST00000369202.1:chr1:148251926:-	4,5	-
chr1	148252108	148252109	ENSG00000203832.6:ENST00000369202.1:chr1:148252108:-	2,4	-
chr1	150065694	150065695	ENSG00000136631.8:ENST00000369130.3:chr1:150065694:+	1,23	+
chr1	151342002	151342003	ENSG00000143416.16:ENST00000368868.5:chr1:151342002:-	1,2	-
chr6	93973629	93973630	ENSG00000135333.9:ENST00000369303.4:chr6:93973629:-	5,20	-
chr6	93964485	93964486	ENSG00000135333.9:ENST00000369303.4:chr6:93964485:-	1,21	-
chr6	101296533	101296534	ENSG00000112249.9:ENST00000369162.2:chr6:101296533:-	1,21	-
chr6	105816808	105816809	ENSG00000085377.9:ENST00000369110.3:chr6:105816808:-	1,34	-
chr6	105726167	105726168	ENSG00000085377.9:ENST00000369110.3:chr6:105726167:-	1,34	-
chr6	108250658	108250659	ENSG00000025796.9:ENST00000369002.4:chr6:108250658:-	1,61	-
chr10	114204951	114204952	ENSG00000023041.7:ENST00000369405.3:chr10:114204951:-	1,30	-
chr10	120832509	120832510	ENSG00000107581.8:ENST00000369144.3:chr10:120832509:-	1144	-
chr10	120816324	120816325	ENSG00000107581.8:ENST00000369144.3:chr10:120816324:-	1123	-
chr10	120802273	120802274	ENSG00000107581.8:ENST00000369144.3:chr10:120802273:-	1,83	-
chr10	120795696	120795697	ENSG00000107581.8:ENST00000369144.3:chr10:120795696:-	1,84	-
chr10	121431927	121431928	ENSG00000151929.5:ENST00000369085.3:chr10:121431927:+	1,19	+
chr10	121674302	121674303	ENSG00000107651.8:ENST00000369075.3:chr10:121674302:+	1,76	+
chr10	123549790	123549791	ENSG00000107669.13:ENST00000369043.3:chr10:123549790:-	1,16	-
chr10	124221635	124221636	ENSG00000166033.7:ENST00000368984.3:chr10:124221635:+	1,4	+
chr10	124753658	124753659	ENSG00000095574.7:ENST00000368886.5:chr10:124753658:-	1,25	-
chr10	124753697	124753698	ENSG00000095574.7:ENST00000368886.5:chr10:124753697:-	1,25	-
chr10	124754043	124754044	ENSG00000095574.7:ENST00000368886.5:chr10:124754043:-	1,25	-
chr10	126089476	126089477	ENSG00000065154.7:ENST00000368845.5:chr10:126089476:-	1,97	-
chrX	154115452	154115453	ENSG00000197932.3:ENST00000369446.2:chrX:154115452:+	1,1	+
chr1	108686321	108686322	ENSG00000085491.11:ENST00000565488.1:chr1:108686321:-	1,29	-
chr15	55652433	55652434	ENSG00000260916.1:ENST00000569205.1:chr15:55652433:-	1,1	-
chr16	58590776	58590777	ENSG00000125107.12:ENST00000569240.1:chr16:58590776:-	1,9	-
chr16	81388084	81388085	ENSG00000261609.3:ENST00000568107.2:chr16:81388084:+	1,3	+
chr1	28607258	28607259	ENSG00000130766.4:ENST00000253063.3:chr1:28607258:+	1,38	+
chr2	240929558	240929559	ENSG00000130414.7:ENST00000252711.2:chr2:240929558:-	1,13	-
chr3	47814371	47814372	ENSG00000173473.6:ENST00000254480.5:chr3:47814371:-	1,84	-
chr3	47787427	47787428	ENSG00000173473.6:ENST00000254480.5:chr3:47787427:-	1,84	-
chr3	47651606	47651607	ENSG00000173473.6:ENST00000254480.5:chr3:47651606:-	1,44	-
chr5	77298807	77298808	ENSG00000132842.9:ENST00000255194.6:chr5:77298807:-	1,33	-
chr8	21826994	21826995	ENSG00000130227.12:ENST00000252512.9:chr8:21826994:+	1,34	+
chr8	21851950	21851951	ENSG00000130227.12:ENST00000252512.9:chr8:21851950:+	1,34	+
chr11	70221024	70221025	ENSG00000131626.11:ENST00000253925.7:chr11:70221024:+	1,13	+
chr13	31232027	31232028	ENSG00000132952.7:ENST00000255304.4:chr13:31232027:+	1,15	+
chr16	85694836	85694837	ENSG00000131149.13:ENST00000253458.7:chr16:85694836:+	1,3	+
chr17	1746097	1746098	ENSG00000132383.7:ENST00000254719.5:chr17:1746097:+	1178	+
chr17	1747974	1747975	ENSG00000132383.7:ENST00000254719.5:chr17:1747974:+	1178	+
chr17	1782335	1782336	ENSG00000132383.7:ENST00000254719.5:chr17:1782335:+	1184	+
chr17	1787146	1787147	ENSG00000132383.7:ENST00000254719.5:chr17:1787146:+	1185	+
chr17	1795163	1795164	ENSG00000132383.7:ENST00000254719.5:chr17:1795163:+	1185	+
chr17	27182165	27182166	ENSG00000132591.7:ENST00000254928.5:chr17:27182165:+	1,11	+
chr17	65732017	65732018	ENSG00000130935.5:ENST00000253247.4:chr17:65732017:+	1213	+
chr17	65733797	65733798	ENSG00000130935.5:ENST00000253247.4:chr17:65733797:+	1213	+
chr17	65733971	65733972	ENSG00000130935.5:ENST00000253247.4:chr17:65733971:+	1213	+
chr17	65735067	65735068	ENSG00000130935.5:ENST00000253247.4:chr17:65735067:+	1209	+
chr17	65739687	65739688	ENSG00000130935.5:ENST00000253247.4:chr17:65739687:+	1210	+
chr17	73775208	73775209	ENSG00000132475.4:ENST00000254810.4:chr17:73775208:-	1178	-
chr17	73774943	73774944	ENSG00000132475.4:ENST00000254810.4:chr17:73774943:-	1179	-
chr19	39207752	39207753	ENSG00000130402.7:ENST00000252699.2:chr19:39207752:+	1,64	+
chr19	39207937	39207938	ENSG00000130402.7:ENST00000252699.2:chr19:39207937:+	1,64	+
chr19	48955971	48955972	ENSG00000105447.8:ENST00000253237.5:chr19:48955971:+	1,67	+
chr19	48956146	48956147	ENSG00000105447.8:ENST00000253237.5:chr19:48956146:+	1,67	+
chr19	50881937	50881938	ENSG00000131408.9:ENST00000253727.5:chr19:50881937:+	1,2	+
chr19	50885789	50885790	ENSG00000131408.9:ENST00000253727.5:chr19:50885789:+	1,2	+
chr19	59061202	59061203	ENSG00000130726.7:ENST00000253024.5:chr19:59061202:+	1,52	+
chr22	46085644	46085645	ENSG00000130638.11:ENST00000252934.5:chr22:46085644:+	1100	+
chr1	228675538	228675539	ENSG00000168159.9:ENST00000305943.7:chr1:228675538:+	1,87	+
chr2	29083986	29083987	ENSG00000171103.6:ENST00000306108.5:chr2:29083986:-	6,16	-
chr2	237074735	237074736	ENSG00000168505.6:ENST00000306318.4:chr2:237074735:-	1,1	-
chr3	33109742	33109743	ENSG00000170266.11:ENST00000307363.5:chr3:33109742:-	1,52	-
chr3	33093419	33093420	ENSG00000170266.11:ENST00000307363.5:chr3:33093419:-	1,52	-
chr3	33877539	33877540	ENSG00000170248.9:ENST00000307296.3:chr3:33877539:+	1,75	+
chr3	33887042	33887043	ENSG00000170248.9:ENST00000307296.3:chr3:33887042:+	1,75	+
chr3	67548637	67548638	ENSG00000172340.10:ENST00000307227.5:chr3:67548637:-	1,34	-
chr4	144106648	144106649	ENSG00000170185.5:ENST00000307017.4:chr4:144106648:+	1,31	+
chr4	166000871	166000872	ENSG00000170088.9:ENST00000306480.6:chr4:166000871:-	1,10	-
chr7	16650247	16650248	ENSG00000106524.4:ENST00000306999.2:chr7:16650247:-	1,16	-
chr8	145488717	145488718	ENSG00000170727.7:ENST00000307404.5:chr8:145488717:-	1,39	-
chr10	74033994	74033995	ENSG00000168209.4:ENST00000307365.3:chr10:74033994:+	1,28	+
chr11	61563323	61563324	ENSG00000168496.3:ENST00000305885.2:chr11:61563323:+	1138	+
chr14	39565301	39565302	ENSG00000100934.10:ENST00000307712.6:chr14:39565301:-	1,88	-
chr14	39561827	39561828	ENSG00000100934.10:ENST00000307712.6:chr14:39561827:-	1,89	-
chr14	39517874	39517875	ENSG00000100934.10:ENST00000307712.6:chr14:39517874:-	1,91	-
chr15	66737038	66737039	ENSG00000169032.5:ENST00000307102.5:chr15:66737038:+	1,62	+
chr15	66782842	66782843	ENSG00000169032.5:ENST00000307102.5:chr15:66782842:+	1,63	+
chr16	23444981	23444982	ENSG00000168434.8:ENST00000307149.5:chr16:23444981:-	1,29	-
chr16	23428308	23428309	ENSG00000168434.8:ENST00000307149.5:chr16:23428308:-	1,29	-
chr16	23415130	23415131	ENSG00000168434.8:ENST00000307149.5:chr16:23415130:-	1,29	-
chr17	18692717	18692718	ENSG00000171928.9:ENST00000307767.8:chr17:18692717:+	1,12	+
chr17	74066498	74066499	ENSG00000167881.10:ENST00000307877.2:chr17:74066498:-	1100	-
chr17	74060225	74060226	ENSG00000167881.10:ENST00000307877.2:chr17:74060225:-	1101	-
chr17	74035971	74035972	ENSG00000167881.10:ENST00000307877.2:chr17:74035971:-	1101	-
chr17	78449880	78449881	ENSG00000171246.5:ENST00000306773.4:chr17:78449880:-	1,29	-
chr17	78444781	78444782	ENSG00000171246.5:ENST00000306773.4:chr17:78444781:-	1,31	-
chr19	2813232	2813233	ENSG00000172009.10:ENST00000307741.6:chr19:2813232:+	1,78	+
chr3	47866630	47866631	ENSG00000132153.10:ENST00000457607.1:chr3:47866630:+	1129	+
chr3	47883217	47883218	ENSG00000132153.10:ENST00000457607.1:chr3:47883217:+	1129	+
chr3	47888268	47888269	ENSG00000132153.10:ENST00000457607.1:chr3:47888268:+	1129	+
chr3	47888782	47888783	ENSG00000132153.10:ENST00000457607.1:chr3:47888782:+	1129	+
chr3	47888968	47888969	ENSG00000132153.10:ENST00000457607.1:chr3:47888968:+	1129	+
chr3	47890289	47890290	ENSG00000132153.10:ENST00000457607.1:chr3:47890289:+	1129	+
chr3	148765848	148765849	ENSG00000071794.11:ENST00000465259.1:chr3:148765848:-	1,14	-
chr3	148765911	148765912	ENSG00000071794.11:ENST00000465259.1:chr3:148765911:-	1,14	-
chr3	148763963	148763964	ENSG00000071794.11:ENST00000465259.1:chr3:148763963:-	1,14	-
chr4	2896427	2896428	ENSG00000087274.12:ENST00000446856.1:chr4:2896427:+	1,18	+
chr14	102348524	102348525	ENSG00000078304.15:ENST00000445439.3:chr14:102348524:+	1,14	+
chr15	75130656	75130657	ENSG00000140474.8:ENST00000440863.2:chr15:75130656:-	1,6	-
chr1	151316231	151316232	ENSG00000143390.13:ENST00000290524.4:chr1:151316231:-	1,28	-
chr3	39139902	39139903	ENSG00000114745.9:ENST00000319283.3:chr3:39139902:-	1,20	-
chr3	52248159	52248160	ENSG00000023330.10:ENST00000310271.2:chr3:52248159:+	1,30	+
chr5	154251379	154251380	ENSG00000155508.9:ENST00000285896.6:chr5:154251379:+	1,10	+
chr7	43916392	43916393	ENSG00000106608.12:ENST00000223341.7:chr7:43916392:-	1,1	-
chr9	139732039	139732040	ENSG00000196642.11:ENST00000311502.7:chr9:139732039:+	1,5	+
chr12	58088560	58088561	ENSG00000135506.11:ENST00000257966.8:chr12:58088560:+	1,40	+
chr12	58089767	58089768	ENSG00000135506.11:ENST00000257966.8:chr12:58089767:+	1,41	+
chr12	58109643	58109644	ENSG00000135506.11:ENST00000257966.8:chr12:58109643:+	1,41	+
chr15	41657679	41657680	ENSG00000137804.8:ENST00000260359.6:chr15:41657679:+	1,22	+
chr15	66604102	66604103	ENSG00000166938.8:ENST00000319194.5:chr15:66604102:+	1,6	+
chr15	74315339	74315340	ENSG00000140464.15:ENST00000268059.6:chr15:74315339:+	1,2	+
chr15	74317230	74317231	ENSG00000140464.15:ENST00000268059.6:chr15:74317230:+	1,2	+
chr16	4484435	4484436	ENSG00000103423.9:ENST00000262375.6:chr16:4484435:+	1,34	+
chr16	4491524	4491525	ENSG00000103423.9:ENST00000262375.6:chr16:4491524:+	1,34	+
chr16	4494693	4494694	ENSG00000103423.9:ENST00000262375.6:chr16:4494693:+	1,34	+
chr16	31201067	31201068	ENSG00000089280.14:ENST00000254108.7:chr16:31201067:+	1100	+
chr16	31201393	31201394	ENSG00000089280.14:ENST00000254108.7:chr16:31201393:+	1100	+
chr16	58592439	58592440	ENSG00000125107.12:ENST00000317147.5:chr16:58592439:-	1,56	-
chr16	58589265	58589266	ENSG00000125107.12:ENST00000317147.5:chr16:58589265:-	1,57	-
chr16	58585707	58585708	ENSG00000125107.12:ENST00000317147.5:chr16:58585707:-	1,57	-
chr16	58572806	58572807	ENSG00000125107.12:ENST00000317147.5:chr16:58572806:-	1,60	-
chr16	58554924	58554925	ENSG00000125107.12:ENST00000317147.5:chr16:58554924:-	1,62	-
chr17	19286502	19286503	ENSG00000166484.15:ENST00000308406.5:chr17:19286502:+	1,4	+
chr17	40485961	40485962	ENSG00000168610.10:ENST00000264657.5:chr17:40485961:-	1,42	-
chr17	49067166	49067167	ENSG00000008294.16:ENST00000262013.7:chr17:49067166:-	1,10	-
chr19	10792718	10792719	ENSG00000129351.13:ENST00000318511.3:chr19:10792718:+	1,14	+
chr19	10923027	10923028	ENSG00000079805.12:ENST00000314646.5:chr19:10923027:+	1,14	+
chrX	10417552	10417553	ENSG00000101871.10:ENST00000317552.4:chrX:10417552:-	1,17	-
chrX	54956729	54956730	ENSG00000067445.16:ENST00000173898.7:chrX:54956729:+	1,10	+
chr1	32800223	32800224	ENSG00000175130.6:ENST00000329421.7:chr1:32800223:-	1,60	-
chr2	111292703	111292704	ENSG00000183054.7:ENST00000329516.3:chr2:111292703:-	1,3	-
chr5	148730643	148730644	ENSG00000164284.10:ENST00000329271.3:chr5:148730643:+	1,87	+
chr6	30692017	30692018	ENSG00000196230.8:ENST00000327892.8:chr6:30692017:+	1,49	+
chr7	74489314	74489315	ENSG00000174374.9:ENST00000329959.4:chr7:74489314:-	1,30	-
chr7	137600720	137600721	ENSG00000182158.10:ENST00000330387.6:chr7:137600720:-	1,3	-
chr10	5791832	5791833	ENSG00000108021.15:ENST00000328090.5:chr10:5791832:+	1,27	+
chr11	120082012	120082013	ENSG00000184232.4:ENST00000328965.4:chr11:120082012:+	1,9	+
chr14	21991315	21991316	ENSG00000165821.7:ENST00000327430.3:chr14:21991315:-	1,2	-
chr14	21992956	21992957	ENSG00000165821.7:ENST00000327430.3:chr14:21992956:-	1,2	-
chr15	90630401	90630402	ENSG00000182054.5:ENST00000330062.3:chr15:90630401:-	1,28	-
chr17	79663481	79663482	ENSG00000185359.8:ENST00000329138.4:chr17:79663481:+	1,27	+
chr19	47856799	47856800	ENSG00000134815.14:ENST00000328771.4:chr19:47856799:+	1,11	+
chr20	2637049	2637050	ENSG00000101361.10:ENST00000329276.5:chr20:2637049:+	1,31	+
chr2	67630061	67630062	ENSG00000143971.7:ENST00000272342.5:chr2:67630061:+	1,11	+
chr2	95753274	95753275	ENSG00000144029.7:ENST00000272418.2:chr2:95753274:-	1,18	-
chr2	121047307	121047308	ENSG00000144118.9:ENST00000272519.5:chr2:121047307:+	1,27	+
chr3	113517136	113517137	ENSG00000114573.5:ENST00000273398.3:chr3:113517136:+	1,81	+
chr3	183861991	183861992	ENSG00000145191.7:ENST00000273783.3:chr3:183861991:+	1,35	+
chr4	68374681	68374682	ENSG00000145241.6:ENST00000273853.6:chr4:68374681:-	1,17	-
chr4	88106452	88106453	ENSG00000145332.9:ENST00000273963.5:chr4:88106452:-	1,23	-
chr4	122744670	122744671	ENSG00000145386.5:ENST00000274026.5:chr4:122744670:-	1124	-
chr4	122743634	122743635	ENSG00000145386.5:ENST00000274026.5:chr4:122743634:-	1124	-
chr5	114860944	114860945	ENSG00000145780.6:ENST00000274457.3:chr5:114860944:-	1,15	-
chr5	115428390	115428391	ENSG00000145781.4:ENST00000274458.4:chr5:115428390:+	1,5	+
chr6	26598850	26598851	ENSG00000146109.3:ENST00000274849.1:chr6:26598850:+	1,17	+
chr7	156755723	156755724	ENSG00000146909.3:ENST00000275820.3:chr7:156755723:+	1,12	+
chr8	22900753	22900754	ENSG00000120889.8:ENST00000276431.4:chr8:22900753:-	1,26	-
chr8	38688684	38688685	ENSG00000147526.15:ENST00000276520.8:chr8:38688684:+	1,4	+
chr1	23645095	23645096	ENSG00000125944.14:ENST00000478691.1:chr1:23645095:-	1,99	-
chr1	23645112	23645113	ENSG00000125944.14:ENST00000478691.1:chr1:23645112:-	1,99	-
chr3	128890318	128890319	ENSG00000169714.12:ENST00000502976.1:chr3:128890318:-	1,70	-
chr4	83774735	83774736	ENSG00000138674.12:ENST00000395310.2:chr4:83774735:-	1,26	-
chr5	149755388	149755389	ENSG00000070814.13:ENST00000445265.2:chr5:149755388:+	1,21	+
chr6	136599372	136599373	ENSG00000029363.11:ENST00000527536.1:chr6:136599372:-	1,18	-
chr8	38275793	38275794	ENSG00000077782.15:ENST00000397091.5:chr8:38275793:-	1,5	-
chr8	101936264	101936265	ENSG00000164924.13:ENST00000395958.2:chr8:101936264:-	1300	-
chr8	144671744	144671745	ENSG00000104529.13:ENST00000442189.2:chr8:144671744:-	1,2	-
chr9	80851449	80851450	ENSG00000148019.8:ENST00000277082.5:chr9:80851449:+	1,1	+
chr9	86593140	86593141	ENSG00000165119.14:ENST00000376264.2:chr9:86593140:-	1162	-
chr9	86588875	86588876	ENSG00000165119.14:ENST00000376264.2:chr9:86588875:-	1162	-
chr9	86586938	86586939	ENSG00000165119.14:ENST00000376264.2:chr9:86586938:-	1167	-
chr9	86586636	86586637	ENSG00000165119.14:ENST00000376264.2:chr9:86586636:-	1167	-
chr10	43883162	43883163	ENSG00000169813.12:ENST00000544000.1:chr10:43883162:-	1,11	-
chr11	62655822	62655823	ENSG00000168003.12:ENST00000377892.1:chr11:62655822:+	1,5	+
chr12	98991767	98991768	ENSG00000075415.8:ENST00000552981.1:chr12:98991767:+	1,30	+
chr1	1422018	1422019	ENSG00000160072.15:ENST00000308647.7:chr1:1422018:+	1,20	+
chr2	231927246	231927247	ENSG00000173692.8:ENST00000308696.6:chr2:231927246:+	1424	+
chr2	231947645	231947646	ENSG00000173692.8:ENST00000308696.6:chr2:231947645:+	1429	+
chr2	231949785	231949786	ENSG00000173692.8:ENST00000308696.6:chr2:231949785:+	1429	+
chr2	232003478	232003479	ENSG00000173692.8:ENST00000308696.6:chr2:232003478:+	1429	+
chr2	232003530	232003531	ENSG00000173692.8:ENST00000308696.6:chr2:232003530:+	1429	+
chr2	232026163	232026164	ENSG00000173692.8:ENST00000308696.6:chr2:232026163:+	1429	+
chr3	184021140	184021141	ENSG00000175166.12:ENST00000310118.4:chr3:184021140:+	1138	+
chr3	184024189	184024190	ENSG00000175166.12:ENST00000310118.4:chr3:184024189:+	1139	+
chr7	38791783	38791784	ENSG00000006715.11:ENST00000310301.4:chr7:38791783:-	1,30	-
chr7	142991407	142991408	ENSG00000106144.15:ENST00000310447.5:chr7:142991407:+	1,28	+
chr9	32418453	32418454	ENSG00000122729.14:ENST00000309951.6:chr9:32418453:+	1103	+
chr9	32420938	32420939	ENSG00000122729.14:ENST00000309951.6:chr9:32420938:+	1103	+
chr9	32424651	32424652	ENSG00000122729.14:ENST00000309951.6:chr9:32424651:+	1103	+
chr9	32429422	32429423	ENSG00000122729.14:ENST00000309951.6:chr9:32429422:+	1103	+
chr9	32433826	32433827	ENSG00000122729.14:ENST00000309951.6:chr9:32433826:+	1103	+
chr9	131286109	131286110	ENSG00000119392.10:ENST00000309971.4:chr9:131286109:+	1,54	+
chr10	89530761	89530762	ENSG00000138138.9:ENST00000308448.7:chr10:89530761:-	1,17	-
chr11	66391698	66391699	ENSG00000239306.4:ENST00000310137.4:chr11:66391698:+	1,49	+
chr12	49229921	49229922	ENSG00000174243.5:ENST00000308025.3:chr12:49229921:-	1,50	-
chr16	23481360	23481361	ENSG00000103365.11:ENST00000309859.4:chr16:23481360:-	1115	-
chr19	3982864	3982865	ENSG00000167658.11:ENST00000309311.6:chr19:3982864:-	1296	-
chr19	3982368	3982369	ENSG00000167658.11:ENST00000309311.6:chr19:3982368:-	1302	-
chr19	3980911	3980912	ENSG00000167658.11:ENST00000309311.6:chr19:3980911:-	1324	-
chr19	3979858	3979859	ENSG00000167658.11:ENST00000309311.6:chr19:3979858:-	1337	-
chr19	3979910	3979911	ENSG00000167658.11:ENST00000309311.6:chr19:3979910:-	1337	-
chr19	3979950	3979951	ENSG00000167658.11:ENST00000309311.6:chr19:3979950:-	1337	-
chr19	3980027	3980028	ENSG00000167658.11:ENST00000309311.6:chr19:3980027:-	1333	-
chr19	3980039	3980040	ENSG00000167658.11:ENST00000309311.6:chr19:3980039:-	1333	-
chr19	3977946	3977947	ENSG00000167658.11:ENST00000309311.6:chr19:3977946:-	1340	-
chr19	3978042	3978043	ENSG00000167658.11:ENST00000309311.6:chr19:3978042:-	1340	-
chr19	3978059	3978060	ENSG00000167658.11:ENST00000309311.6:chr19:3978059:-	1340	-
chr19	3977507	3977508	ENSG00000167658.11:ENST00000309311.6:chr19:3977507:-	1341	-
chr19	3977508	3977509	ENSG00000167658.11:ENST00000309311.6:chr19:3977508:-	1341	-
chr19	3977545	3977546	ENSG00000167658.11:ENST00000309311.6:chr19:3977545:-	1341	-
chrX	117959792	117959793	ENSG00000174460.3:ENST00000310164.2:chrX:117959792:+	1,41	+
chrX	117959819	117959820	ENSG00000174460.3:ENST00000310164.2:chrX:117959819:+	1,41	+
chr1	155697441	155697442	ENSG00000132676.11:ENST00000368336.5:chr1:155697441:+	1,14	+
chr1	155899620	155899621	ENSG00000132680.6:ENST00000368320.3:chr1:155899620:-	1,6	-
chr1	156697037	156697038	ENSG00000143319.12:ENST00000368219.1:chr1:156697037:-	1,18	-
chr1	160000286	160000287	ENSG00000143315.5:ENST00000368090.2:chr1:160000286:-	1,31	-
chr1	161172267	161172268	ENSG00000158864.8:ENST00000367993.3:chr1:161172267:+	1,34	+
chr1	161197500	161197501	ENSG00000158882.8:ENST00000367988.3:chr1:161197500:+	1,17	+
chr1	167341194	167341195	ENSG00000143190.17:ENST00000367866.2:chr1:167341194:+	1,9	+
chr1	167341211	167341212	ENSG00000143190.17:ENST00000367866.2:chr1:167341211:+	1,9	+
chr1	179316747	179316748	ENSG00000057252.8:ENST00000367619.3:chr1:179316747:+	1,33	+
chr1	179318073	179318074	ENSG00000057252.8:ENST00000367619.3:chr1:179318073:+	1,33	+
chr1	180849281	180849282	ENSG00000143324.9:ENST00000367590.4:chr1:180849281:+	1,17	+
chr6	112397313	112397314	ENSG00000074935.9:ENST00000368662.5:chr6:112397313:-	1,5	-
chr6	132793500	132793501	ENSG00000079950.9:ENST00000367941.2:chr6:132793500:-	1,24	-
chr6	135314921	135314922	ENSG00000112339.10:ENST00000367837.5:chr6:135314921:-	1,94	-
chr6	142519691	142519692	ENSG00000009844.11:ENST00000367630.4:chr6:142519691:+	1,80	+
chr6	144171286	144171287	ENSG00000135521.8:ENST00000367576.5:chr6:144171286:+	1108	+
chr1	1447700	1447701	ENSG00000197785.9:ENST00000378756.3:chr1:1447700:+	2,20	+
chr1	1463163	1463164	ENSG00000197785.9:ENST00000378756.3:chr1:1463163:+	1,20	+
chr1	1720576	1720577	ENSG00000078369.13:ENST00000378609.4:chr1:1720576:-	1,31	-
chr6	12126074	12126075	ENSG00000095951.12:ENST00000379388.2:chr6:12126074:+	1,3	+
chr6	24415305	24415306	ENSG00000124532.10:ENST00000378386.3:chr6:24415305:+	1,58	+
chr7	133991443	133991444	ENSG00000205060.6:ENST00000378509.4:chr7:133991443:-	1,46	-
chr9	33935848	33935849	ENSG00000137073.16:ENST00000379238.1:chr9:33935848:-	1,15	-
chr11	43345182	43345183	ENSG00000166181.8:ENST00000378852.3:chr11:43345182:+	1230	+
chr11	43348107	43348108	ENSG00000166181.8:ENST00000378852.3:chr11:43348107:+	1230	+
chr11	43351582	43351583	ENSG00000166181.8:ENST00000378852.3:chr11:43351582:+	1235	+
chr11	47862099	47862100	ENSG00000030066.9:ENST00000378460.2:chr11:47862099:-	1,65	-
chr11	47861441	47861442	ENSG00000030066.9:ENST00000378460.2:chr11:47861441:-	1,66	-
chr11	47828686	47828687	ENSG00000030066.9:ENST00000378460.2:chr11:47828686:-	1,73	-
chr11	47826145	47826146	ENSG00000030066.9:ENST00000378460.2:chr11:47826145:-	1,73	-
chr11	47814402	47814403	ENSG00000030066.9:ENST00000378460.2:chr11:47814402:-	1,75	-
chr11	47806490	47806491	ENSG00000030066.9:ENST00000378460.2:chr11:47806490:-	1,76	-
chr13	41768228	41768229	ENSG00000120696.8:ENST00000379483.3:chr13:41768228:-	1,23	-
chr13	41932488	41932489	ENSG00000172766.14:ENST00000379406.3:chr13:41932488:+	1,12	+
chr13	48562779	48562780	ENSG00000136143.9:ENST00000378654.3:chr13:48562779:-	1,87	-
chr20	10019143	10019144	ENSG00000132623.11:ENST00000378380.3:chr20:10019143:+	1,2	+
chrX	21863444	21863445	ENSG00000012174.7:ENST00000379484.5:chrX:21863444:+	1,42	+
chrX	31200941	31200942	ENSG00000198947.10:ENST00000378723.3:chrX:31200941:-	1,5	-
chr1	182025888	182025889	ENSG00000179930.5:ENST00000339948.3:chr1:182025888:-	1,2	-
chr2	174055828	174055829	ENSG00000091436.12:ENST00000338983.3:chr2:174055828:+	1,9	+
chr7	139167928	139167929	ENSG00000188883.4:ENST00000340940.4:chr7:139167928:-	1,1	-
chr7	155094519	155094520	ENSG00000186480.8:ENST00000340368.4:chr7:155094519:+	1,45	+
chr9	96214326	96214327	ENSG00000048828.12:ENST00000340893.4:chr9:96214326:+	1,2	+
chr9	96214615	96214616	ENSG00000048828.12:ENST00000340893.4:chr9:96214615:+	1,2	+
chr9	96291720	96291721	ENSG00000048828.12:ENST00000340893.4:chr9:96291720:+	1,2	+
chr10	34688286	34688287	ENSG00000148498.11:ENST00000340077.5:chr10:34688286:-	1,1	-
chr11	10827503	10827504	ENSG00000110321.11:ENST00000339995.5:chr11:10827503:-	1671	-
chr11	10825870	10825871	ENSG00000110321.11:ENST00000339995.5:chr11:10825870:-	1672	-
chr11	10825493	10825494	ENSG00000110321.11:ENST00000339995.5:chr11:10825493:-	1672	-
chr11	10823924	10823925	ENSG00000110321.11:ENST00000339995.5:chr11:10823924:-	1672	-
chr11	10823317	10823318	ENSG00000110321.11:ENST00000339995.5:chr11:10823317:-	1672	-
chr11	10822288	10822289	ENSG00000110321.11:ENST00000339995.5:chr11:10822288:-	1672	-
chr11	10822019	10822020	ENSG00000110321.11:ENST00000339995.5:chr11:10822019:-	1672	-
chr11	10821658	10821659	ENSG00000110321.11:ENST00000339995.5:chr11:10821658:-	1672	-
chr11	10821741	10821742	ENSG00000110321.11:ENST00000339995.5:chr11:10821741:-	1672	-
chr11	10821749	10821750	ENSG00000110321.11:ENST00000339995.5:chr11:10821749:-	1672	-
chr11	10821845	10821846	ENSG00000110321.11:ENST00000339995.5:chr11:10821845:-	2671	-
chr11	10821151	10821152	ENSG00000110321.11:ENST00000339995.5:chr11:10821151:-	1672	-
chr11	10821244	10821245	ENSG00000110321.11:ENST00000339995.5:chr11:10821244:-	2672	-
chr11	10820786	10820787	ENSG00000110321.11:ENST00000339995.5:chr11:10820786:-	1672	-
chr11	10820902	10820903	ENSG00000110321.11:ENST00000339995.5:chr11:10820902:-	1672	-
chr11	10820906	10820907	ENSG00000110321.11:ENST00000339995.5:chr11:10820906:-	1672	-
chr11	10820911	10820912	ENSG00000110321.11:ENST00000339995.5:chr11:10820911:-	1671	-
chr11	10820593	10820594	ENSG00000110321.11:ENST00000339995.5:chr11:10820593:-	1672	-
chr11	10820646	10820647	ENSG00000110321.11:ENST00000339995.5:chr11:10820646:-	1672	-
chr11	17394006	17394007	ENSG00000188211.4:ENST00000338965.4:chr11:17394006:+	1,5	+
chr11	17394041	17394042	ENSG00000188211.4:ENST00000338965.4:chr11:17394041:+	1,5	+
chr12	33030959	33030960	ENSG00000057294.9:ENST00000340811.4:chr12:33030959:-	1,22	-
chr12	125398080	125398081	ENSG00000150991.10:ENST00000339647.5:chr12:125398080:-	1134	-
chr13	20277438	20277439	ENSG00000121390.13:ENST00000338910.4:chr13:20277438:-	1,20	-
chr19	10288031	10288032	ENSG00000130816.10:ENST00000340748.4:chr19:10288031:-	1,9	-
chr19	10252843	10252844	ENSG00000130816.10:ENST00000340748.4:chr19:10252843:-	1,9	-
chr21	45106745	45106746	ENSG00000160208.11:ENST00000340648.4:chr21:45106745:+	1,89	+
chr21	45107759	45107760	ENSG00000160208.11:ENST00000340648.4:chr21:45107759:+	1,85	+
chr1	234586240	234586241	ENSG00000059588.5:ENST00000040877.1:chr1:234586240:-	1,15	-
chr1	234565316	234565317	ENSG00000059588.5:ENST00000040877.1:chr1:234565316:-	1,17	-
chr2	86509328	86509329	ENSG00000068615.12:ENST00000165698.5:chr2:86509328:-	1,14	-
chr2	98373570	98373571	ENSG00000075568.12:ENST00000186436.5:chr2:98373570:-	1,8	-
chr3	12623418	12623419	ENSG00000075975.11:ENST00000170447.7:chr3:12623418:+	1,91	+
chr5	916074	916075	ENSG00000071539.9:ENST00000166345.3:chr5:916074:+	1,56	+
chr5	41842859	41842860	ENSG00000083720.8:ENST00000196371.5:chr5:41842859:-	1,23	-
chr5	128448550	128448551	ENSG00000066583.7:ENST00000173527.5:chr5:128448550:+	1,60	+
chr6	13711481	13711482	ENSG00000010017.9:ENST00000011619.3:chr6:13711481:-	1,1	-
chr6	143823531	143823532	ENSG00000001036.9:ENST00000002165.6:chr6:143823531:-	1,40	-
chr7	97984372	97984373	ENSG00000006453.9:ENST00000005260.8:chr7:97984372:-	1,12	-
chr7	97944788	97944789	ENSG00000006453.9:ENST00000005260.8:chr7:97944788:-	1,12	-
chr11	73101895	73101896	ENSG00000054967.8:ENST00000064780.2:chr11:73101895:+	1,7	+
chr12	2910459	2910460	ENSG00000004478.5:ENST00000001008.4:chr12:2910459:+	1106	+
chr12	6439118	6439119	ENSG00000067182.3:ENST00000162749.2:chr12:6439118:-	1,5	-
chr12	48091492	48091493	ENSG00000005175.5:ENST00000005386.3:chr12:48091492:-	1,61	-
chr15	78837287	78837288	ENSG00000041357.11:ENST00000044462.7:chr15:78837287:+	1,46	+
chr15	78838926	78838927	ENSG00000041357.11:ENST00000044462.7:chr15:78838926:+	1,46	+
chr16	75611239	75611240	ENSG00000034713.3:ENST00000037243.2:chr16:75611239:+	1,8	+
chr19	19245660	19245661	ENSG00000064545.10:ENST00000162044.9:chr19:19245660:-	1,12	-
chr1	16774449	16774450	ENSG00000157191.15:ENST00000337132.5:chr1:16774449:+	1,29	+
chr1	87369068	87369069	ENSG00000183291.11:ENST00000331835.5:chr1:87369068:-	1,89	-
chr1	87369080	87369081	ENSG00000183291.11:ENST00000331835.5:chr1:87369080:-	1,89	-
chr5	176938874	176938875	ENSG00000183258.7:ENST00000330503.7:chr5:176938874:-	1,4	-
chr8	25360991	25360992	ENSG00000184661.9:ENST00000330560.3:chr8:25360991:+	1,21	+
chr8	103845410	103845411	ENSG00000155096.9:ENST00000337198.5:chr8:103845410:-	1,68	-
chr10	90988066	90988067	ENSG00000107798.13:ENST00000336233.5:chr10:90988066:-	1,42	-
chr11	62334969	62334970	ENSG00000254772.5:ENST00000329251.4:chr11:62334969:-	1128	-
chr11	62327802	62327803	ENSG00000254772.5:ENST00000329251.4:chr11:62327802:-	1128	-
chr12	95434279	95434280	ENSG00000120798.12:ENST00000333003.5:chr12:95434279:-	1,10	-
chr13	113834492	113834493	ENSG00000126226.17:ENST00000337344.4:chr13:113834492:-	1,4	-
chr14	102391585	102391586	ENSG00000078304.15:ENST00000334743.5:chr14:102391585:+	1,12	+
chr15	72511353	72511354	ENSG00000067225.13:ENST00000335181.5:chr15:72511353:-	1684	-
chr15	72511405	72511406	ENSG00000067225.13:ENST00000335181.5:chr15:72511405:-	1684	-
chr15	72501142	72501143	ENSG00000067225.13:ENST00000335181.5:chr15:72501142:-	1698	-
chr15	72501156	72501157	ENSG00000067225.13:ENST00000335181.5:chr15:72501156:-	1697	-
chr15	72499486	72499487	ENSG00000067225.13:ENST00000335181.5:chr15:72499486:-	1698	-
chr15	72499495	72499496	ENSG00000067225.13:ENST00000335181.5:chr15:72499495:-	1698	-
chr15	72499082	72499083	ENSG00000067225.13:ENST00000335181.5:chr15:72499082:-	1698	-
chr15	72492922	72492923	ENSG00000067225.13:ENST00000335181.5:chr15:72492922:-	1698	-
chr15	72492964	72492965	ENSG00000067225.13:ENST00000335181.5:chr15:72492964:-	1698	-
chr15	72492993	72492994	ENSG00000067225.13:ENST00000335181.5:chr15:72492993:-	1698	-
chr15	72492026	72492027	ENSG00000067225.13:ENST00000335181.5:chr15:72492026:-	1698	-
chr17	79803759	79803760	ENSG00000185624.10:ENST00000331483.4:chr17:79803759:-	1174	-
chr17	79803781	79803782	ENSG00000185624.10:ENST00000331483.4:chr17:79803781:-	1174	-
chr18	34385398	34385399	ENSG00000134779.10:ENST00000334295.4:chr18:34385398:-	1,61	-
chr19	19120764	19120765	ENSG00000064607.12:ENST00000337018.6:chr19:19120764:-	1,23	-
chr22	20106539	20106540	ENSG00000099901.12:ENST00000331821.3:chr22:20106539:+	1,3	+
chr22	28254460	28254461	ENSG00000180957.13:ENST00000335272.5:chr22:28254460:-	1128	-
chrX	15870610	15870611	ENSG00000182287.9:ENST00000329235.2:chrX:15870610:-	1,34	-
chrX	51810097	51810098	ENSG00000187243.12:ENST00000335504.5:chrX:51810097:-	1,7	-
chr1	12059079	12059080	ENSG00000116688.12:ENST00000235329.5:chr1:12059079:+	1,33	+
chr1	91978821	91978822	ENSG00000097046.8:ENST00000234626.6:chr1:91978821:+	1,89	+
chr1	91989930	91989931	ENSG00000097046.8:ENST00000234626.6:chr1:91989930:+	1,89	+
chr1	109774294	109774295	ENSG00000031698.8:ENST00000234677.2:chr1:109774294:+	1,66	+
chr2	9770480	9770481	ENSG00000134308.9:ENST00000238081.3:chr2:9770480:-	1379	-
chr2	9728453	9728454	ENSG00000134308.9:ENST00000238081.3:chr2:9728453:-	1379	-
chr2	48018144	48018145	ENSG00000116062.10:ENST00000234420.5:chr2:48018144:+	1138	+
chr2	48023145	48023146	ENSG00000116062.10:ENST00000234420.5:chr2:48023145:+	2139	+
chr2	48027296	48027297	ENSG00000116062.10:ENST00000234420.5:chr2:48027296:+	1142	+
chr2	48027453	48027454	ENSG00000116062.10:ENST00000234420.5:chr2:48027453:+	1142	+
chr2	48027873	48027874	ENSG00000116062.10:ENST00000234420.5:chr2:48027873:+	1142	+
chr2	61021132	61021133	ENSG00000115421.8:ENST00000238714.3:chr2:61021132:+	1,25	+
chr2	63821646	63821647	ENSG00000014641.13:ENST00000233114.8:chr2:63821646:+	1,51	+
chr2	70524440	70524441	ENSG00000035141.3:ENST00000037869.3:chr2:70524440:-	1,67	-
chr4	57209087	57209088	ENSG00000157426.9:ENST00000205214.6:chr4:57209087:-	1,4	-
chr6	43098110	43098111	ENSG00000112655.11:ENST00000230419.4:chr6:43098110:+	1,16	+
chr7	29980432	29980433	ENSG00000136193.12:ENST00000242059.5:chr7:29980432:-	1,48	-
chr7	107545914	107545915	ENSG00000091140.8:ENST00000205402.5:chr7:107545914:+	1147	+
chr8	53570010	53570011	ENSG00000023287.8:ENST00000025008.5:chr8:53570010:-	1,29	-
chr12	6646823	6646824	ENSG00000111640.10:ENST00000229239.5:chr12:6646823:+	1,82	+
chr12	110897557	110897558	ENSG00000111231.4:ENST00000228827.3:chr12:110897557:-	4,12	-
chr14	51410893	51410894	ENSG00000100504.12:ENST00000216392.7:chr14:51410893:-	1,89	-
chr14	64867584	64867585	ENSG00000100714.11:ENST00000216605.8:chr14:64867584:+	1307	+
chr14	64879203	64879204	ENSG00000100714.11:ENST00000216605.8:chr14:64879203:+	1309	+
chr14	64882094	64882095	ENSG00000100714.11:ENST00000216605.8:chr14:64882094:+	1309	+
chr14	64884679	64884680	ENSG00000100714.11:ENST00000216605.8:chr14:64884679:+	1312	+
chr14	64886629	64886630	ENSG00000100714.11:ENST00000216605.8:chr14:64886629:+	1313	+
chr14	64892848	64892849	ENSG00000100714.11:ENST00000216605.8:chr14:64892848:+	1315	+
chr14	64898526	64898527	ENSG00000100714.11:ENST00000216605.8:chr14:64898526:+	1316	+
chr14	64909005	64909006	ENSG00000100714.11:ENST00000216605.8:chr14:64909005:+	1316	+
chr14	64916198	64916199	ENSG00000100714.11:ENST00000216605.8:chr14:64916198:+	1315	+
chr14	75590838	75590839	ENSG00000119638.8:ENST00000238616.5:chr14:75590838:-	1,16	-
chr14	75573320	75573321	ENSG00000119638.8:ENST00000238616.5:chr14:75573320:-	1,19	-
chr14	102552291	102552292	ENSG00000080824.14:ENST00000216281.8:chr14:102552291:-	1420	-
chr14	102551761	102551762	ENSG00000080824.14:ENST00000216281.8:chr14:102551761:-	1421	-
chr14	102548092	102548093	ENSG00000080824.14:ENST00000216281.8:chr14:102548092:-	1353	-
chr17	45219291	45219292	ENSG00000004897.7:ENST00000066544.3:chr17:45219291:-	1,39	-
chr17	46148839	46148840	ENSG00000108468.10:ENST00000225603.4:chr17:46148839:-	1,57	-
chr19	1434760	1434761	ENSG00000071626.12:ENST00000233078.4:chr19:1434760:+	1,23	+
chr20	5081448	5081449	ENSG00000089063.10:ENST00000202834.7:chr20:5081448:-	1,11	-
chr22	30737723	30737724	ENSG00000099995.14:ENST00000215793.8:chr22:30737723:-	1,95	-
chr22	30736229	30736230	ENSG00000099995.14:ENST00000215793.8:chr22:30736229:-	1,95	-
chr22	30735190	30735191	ENSG00000099995.14:ENST00000215793.8:chr22:30735190:-	1,95	-
chr2	32418010	32418011	ENSG00000152683.10:ENST00000282587.5:chr2:32418010:+	1,9	+
chr2	70057197	70057198	ENSG00000087338.4:ENST00000282570.3:chr2:70057197:+	1,52	+
chr2	70071275	70071276	ENSG00000087338.4:ENST00000282570.3:chr2:70071275:+	1,53	+
chr2	109381770	109381771	ENSG00000153201.11:ENST00000283195.6:chr2:109381770:+	1,27	+
chr2	109383445	109383446	ENSG00000153201.11:ENST00000283195.6:chr2:109383445:+	1,45	+
chr2	109383638	109383639	ENSG00000153201.11:ENST00000283195.6:chr2:109383638:+	1,46	+
chr2	112847226	112847227	ENSG00000153214.5:ENST00000283206.4:chr2:112847226:+	1,3	+
chr2	128050401	128050402	ENSG00000163161.8:ENST00000285398.2:chr2:128050401:-	1,90	-
chr2	128046384	128046385	ENSG00000163161.8:ENST00000285398.2:chr2:128046384:-	1,90	-
chr2	128036798	128036799	ENSG00000163161.8:ENST00000285398.2:chr2:128036798:-	1,90	-
chr3	14188793	14188794	ENSG00000154767.10:ENST00000285021.7:chr3:14188793:-	1,62	-
chr3	14188794	14188795	ENSG00000154767.10:ENST00000285021.7:chr3:14188794:-	1,62	-
chr3	141006181	141006182	ENSG00000155893.7:ENST00000286353.4:chr3:141006181:+	1,14	+
chr3	141632635	141632636	ENSG00000069849.6:ENST00000286371.3:chr3:141632635:+	1,95	+
chr3	141632642	141632643	ENSG00000069849.6:ENST00000286371.3:chr3:141632642:+	1,95	+
chr4	144451642	144451643	ENSG00000153147.5:ENST00000283131.3:chr4:144451642:+	1191	+
chr4	144459998	144459999	ENSG00000153147.5:ENST00000283131.3:chr4:144459998:+	1193	+
chr4	144466666	144466667	ENSG00000153147.5:ENST00000283131.3:chr4:144466666:+	1169	+
chr5	1474713	1474714	ENSG00000153395.5:ENST00000283415.3:chr5:1474713:-	1,30	-
chr5	68504048	68504049	ENSG00000153044.5:ENST00000283006.2:chr5:68504048:+	1,4	+
chr5	154271143	154271144	ENSG00000082516.8:ENST00000285873.7:chr5:154271143:-	1,39	-
chr7	135277863	135277864	ENSG00000155561.10:ENST00000285968.6:chr7:135277863:+	1,74	+
chr7	135286170	135286171	ENSG00000155561.10:ENST00000285968.6:chr7:135286170:+	1,79	+
chr7	135287596	135287597	ENSG00000155561.10:ENST00000285968.6:chr7:135287596:+	1,81	+
chr7	135304252	135304253	ENSG00000155561.10:ENST00000285968.6:chr7:135304252:+	1,83	+
chr7	135304331	135304332	ENSG00000155561.10:ENST00000285968.6:chr7:135304331:+	1,83	+
chr7	135323381	135323382	ENSG00000155561.10:ENST00000285968.6:chr7:135323381:+	1,83	+
chr7	135330219	135330220	ENSG00000155561.10:ENST00000285968.6:chr7:135330219:+	1,83	+
chr7	148725464	148725465	ENSG00000155660.6:ENST00000286091.4:chr7:148725464:-	1131	-
chr7	148709439	148709440	ENSG00000155660.6:ENST00000286091.4:chr7:148709439:-	1133	-
chr7	148703092	148703093	ENSG00000155660.6:ENST00000286091.4:chr7:148703092:-	1134	-
chr7	148702243	148702244	ENSG00000155660.6:ENST00000286091.4:chr7:148702243:-	1134	-
chr7	148702422	148702423	ENSG00000155660.6:ENST00000286091.4:chr7:148702422:-	1134	-
chr7	148701107	148701108	ENSG00000155660.6:ENST00000286091.4:chr7:148701107:-	1133	-
chr7	148701221	148701222	ENSG00000155660.6:ENST00000286091.4:chr7:148701221:-	1133	-
chr8	86377593	86377594	ENSG00000104267.5:ENST00000285379.5:chr8:86377593:+	1131	+
chr9	124132460	124132461	ENSG00000148175.8:ENST00000286713.2:chr9:124132460:-	1,14	-
chr17	13399831	13399832	ENSG00000153976.2:ENST00000284110.1:chr17:13399831:-	1,12	-
chr21	28216667	28216668	ENSG00000154734.10:ENST00000284984.3:chr21:28216667:-	1,36	-
chr21	28216976	28216977	ENSG00000154734.10:ENST00000284984.3:chr21:28216976:-	1,35	-
chr21	28211953	28211954	ENSG00000154734.10:ENST00000284984.3:chr21:28211953:-	1,39	-
chr21	28210341	28210342	ENSG00000154734.10:ENST00000284984.3:chr21:28210341:-	1,39	-
chr21	30445886	30445887	ENSG00000156261.8:ENST00000286788.4:chr21:30445886:-	1274	-
chr21	30442572	30442573	ENSG00000156261.8:ENST00000286788.4:chr21:30442572:-	1274	-
chr21	30439991	30439992	ENSG00000156261.8:ENST00000286788.4:chr21:30439991:-	1274	-
chr21	30433697	30433698	ENSG00000156261.8:ENST00000286788.4:chr21:30433697:-	1274	-
chr21	30432863	30432864	ENSG00000156261.8:ENST00000286788.4:chr21:30432863:-	1272	-
chr21	30428807	30428808	ENSG00000156261.8:ENST00000286788.4:chr21:30428807:-	1272	-
chr6	52141255	52141256	ENSG00000112118.13:ENST00000596288.1:chr6:52141255:-	1,18	-
chr17	40966632	40966633	ENSG00000126581.8:ENST00000590099.1:chr17:40966632:-	1,3	-
chr18	33552852	33552853	ENSG00000141428.12:ENST00000592875.1:chr18:33552852:+	1,2	+
chr18	33706875	33706876	ENSG00000141424.8:ENST00000590986.1:chr18:33706875:-	1,4	-
chr18	43440157	43440158	ENSG00000152223.8:ENST00000590854.1:chr18:43440157:-	1,1	-
chr18	59925273	59925274	ENSG00000134444.9:ENST00000587725.1:chr18:59925273:+	1,1	+
chr19	621318	621319	ENSG00000099821.9:ENST00000588649.2:chr19:621318:-	1,27	-
chr19	5661816	5661817	ENSG00000160633.8:ENST00000592224.1:chr19:5661816:+	1,25	+
chr19	50060481	50060482	ENSG00000142546.9:ENST00000596358.1:chr19:50060481:-	1,3	-
chr1	36636903	36636904	ENSG00000116871.11:ENST00000373150.4:chr1:36636903:+	1,8	+
chr1	38041236	38041237	ENSG00000134697.8:ENST00000373062.3:chr1:38041236:-	1238	-
chr1	38034708	38034709	ENSG00000134697.8:ENST00000373062.3:chr1:38034708:-	1238	-
chr1	38034723	38034724	ENSG00000134697.8:ENST00000373062.3:chr1:38034723:-	2238	-
chr1	40726600	40726601	ENSG00000084073.4:ENST00000372759.3:chr1:40726600:+	1,82	+
chr1	40733463	40733464	ENSG00000084073.4:ENST00000372759.3:chr1:40733463:+	1,82	+
chr1	40747171	40747172	ENSG00000084073.4:ENST00000372759.3:chr1:40747171:+	1,85	+
chr1	41450530	41450531	ENSG00000171793.9:ENST00000372621.4:chr1:41450530:+	1,82	+
chr1	42925397	42925398	ENSG00000127125.7:ENST00000372561.3:chr1:42925397:+	1,7	+
chr6	38652267	38652268	ENSG00000124767.6:ENST00000373365.4:chr6:38652267:-	1570	-
chr9	131392619	131392620	ENSG00000197694.9:ENST00000372731.4:chr9:131392619:+	1,10	+
chr9	131670900	131670901	ENSG00000136802.7:ENST00000372599.3:chr9:131670900:+	1,2	+
chr9	131755888	131755889	ENSG00000095319.10:ENST00000372577.2:chr9:131755888:+	1,36	+
chr10	71912270	71912271	ENSG00000079332.10:ENST00000373241.4:chr10:71912270:-	1122	-
chr10	72619204	72619205	ENSG00000166224.12:ENST00000373202.3:chr10:72619204:+	6,6	+
chr10	72633331	72633332	ENSG00000166224.12:ENST00000373202.3:chr10:72633331:+	1,8	+
chr10	75010746	75010747	ENSG00000182180.9:ENST00000372945.3:chr10:75010746:-	1,48	-
chr10	75158123	75158124	ENSG00000138279.11:ENST00000372921.5:chr10:75158123:-	1,22	-
chr10	75863623	75863624	ENSG00000035403.12:ENST00000372755.3:chr10:75863623:+	2,84	+
chr20	36686016	36686017	ENSG00000101413.7:ENST00000373433.4:chr20:36686016:+	1,26	+
chr20	40050019	40050020	ENSG00000124177.10:ENST00000373233.3:chr20:40050019:-	1,1	-
chr20	43588959	43588960	ENSG00000025772.7:ENST00000372813.3:chr20:43588959:-	1,23	-
chr20	44429723	44429724	ENSG00000101457.8:ENST00000372622.3:chr20:44429723:+	1,7	+
chr20	44433948	44433949	ENSG00000101457.8:ENST00000372622.3:chr20:44433948:+	1,7	+
chrX	80049234	80049235	ENSG00000165288.10:ENST00000373275.4:chrX:80049234:-	1,1	-
chrX	100077284	100077285	ENSG00000101811.9:ENST00000372972.2:chrX:100077284:+	1,43	+
chrX	100078892	100078893	ENSG00000101811.9:ENST00000372972.2:chrX:100078892:+	1,43	+
chr1	16462196	16462197	ENSG00000142627.9:ENST00000358432.5:chr1:16462196:-	1,3	-
chr1	115262357	115262358	ENSG00000009307.11:ENST00000358528.4:chr1:115262357:-	1,62	-
chr1	156715111	156715112	ENSG00000143321.14:ENST00000357325.5:chr1:156715111:-	1,66	-
chr1	156714871	156714872	ENSG00000143321.14:ENST00000357325.5:chr1:156714871:-	1,66	-
chr1	156714109	156714110	ENSG00000143321.14:ENST00000357325.5:chr1:156714109:-	1,66	-
chr1	203667322	203667323	ENSG00000058668.10:ENST00000357681.5:chr1:203667322:+	1,2	+
chr1	203668806	203668807	ENSG00000058668.10:ENST00000357681.5:chr1:203668806:+	1,2	+
chr3	58132649	58132650	ENSG00000136068.10:ENST00000358537.3:chr3:58132649:+	1,9	+
chr3	58139267	58139268	ENSG00000136068.10:ENST00000358537.3:chr3:58139267:+	1,9	+
chr3	180669178	180669179	ENSG00000114416.13:ENST00000357559.4:chr3:180669178:+	1,9	+
chr6	24515485	24515486	ENSG00000112294.8:ENST00000357578.3:chr6:24515485:+	1,27	+
chr6	35604855	35604856	ENSG00000096060.10:ENST00000357266.4:chr6:35604855:-	1,49	-
chr7	100402825	100402826	ENSG00000196411.5:ENST00000358173.3:chr7:100402825:-	1,4	-
chr7	129688873	129688874	ENSG00000091732.11:ENST00000358303.4:chr7:129688873:-	1,26	-
chr7	129662328	129662329	ENSG00000091732.11:ENST00000358303.4:chr7:129662328:-	1,26	-
chr11	75277482	75277483	ENSG00000149257.9:ENST00000358171.3:chr11:75277482:+	1,33	+
chr12	1887115	1887116	ENSG00000006831.9:ENST00000357103.4:chr12:1887115:+	1,61	+
chr12	1889701	1889702	ENSG00000006831.9:ENST00000357103.4:chr12:1889701:+	1,62	+
chr12	1890239	1890240	ENSG00000006831.9:ENST00000357103.4:chr12:1890239:+	1,64	+
chr12	133338284	133338285	ENSG00000176915.10:ENST00000357997.5:chr12:133338284:-	1,40	-
chr12	133313524	133313525	ENSG00000176915.10:ENST00000357997.5:chr12:133313524:-	1,41	-
chr12	133306341	133306342	ENSG00000176915.10:ENST00000357997.5:chr12:133306341:-	2,40	-
chr12	133306667	133306668	ENSG00000176915.10:ENST00000357997.5:chr12:133306667:-	1,41	-
chr17	41243872	41243873	ENSG00000012048.15:ENST00000357654.3:chr17:41243872:-	1,16	-
chr19	7694397	7694398	ENSG00000076924.7:ENST00000358368.4:chr19:7694397:-	1,6	-
chrX	80370161	80370162	ENSG00000198157.6:ENST00000358130.2:chrX:80370161:-	1,24	-
chr6	160113806	160113807	ENSG00000112096.12:ENST00000538183.2:chr6:160113806:-	1,26	-
chr9	34241933	34241934	ENSG00000165006.9:ENST00000540348.1:chr9:34241933:+	1,1	+
chr10	103912197	103912198	ENSG00000166197.12:ENST00000605788.1:chr10:103912197:+	1255	+
chr10	103917818	103917819	ENSG00000166197.12:ENST00000605788.1:chr10:103917818:+	1259	+
chr10	103917820	103917821	ENSG00000166197.12:ENST00000605788.1:chr10:103917820:+	1259	+
chr10	103917825	103917826	ENSG00000166197.12:ENST00000605788.1:chr10:103917825:+	1259	+
chr10	103917833	103917834	ENSG00000166197.12:ENST00000605788.1:chr10:103917833:+	1259	+
chr10	103917842	103917843	ENSG00000166197.12:ENST00000605788.1:chr10:103917842:+	1259	+
chr10	103917958	103917959	ENSG00000166197.12:ENST00000605788.1:chr10:103917958:+	1259	+
chr10	103919702	103919703	ENSG00000166197.12:ENST00000605788.1:chr10:103919702:+	1259	+
chr10	103920447	103920448	ENSG00000166197.12:ENST00000605788.1:chr10:103920447:+	1259	+
chr12	6715534	6715535	ENSG00000111642.10:ENST00000544040.1:chr12:6715534:-	1,12	-
chr12	14628858	14628859	ENSG00000171681.8:ENST00000543189.1:chr12:14628858:+	1,2	+
chr12	121766207	121766208	ENSG00000089053.8:ENST00000541887.1:chr12:121766207:-	1,29	-
chr14	21702244	21702245	ENSG00000092199.13:ENST00000555914.1:chr14:21702244:-	1,20	-
chr14	51383410	51383411	ENSG00000100504.12:ENST00000544180.2:chr14:51383410:-	1,5	-
chr14	70237817	70237818	ENSG00000100650.11:ENST00000553521.1:chr14:70237817:+	1,21	+
chr17	44248847	44248848	ENSG00000120071.8:ENST00000574590.1:chr17:44248847:-	1,1	-
chr17	57287648	57287649	ENSG00000167447.8:ENST00000578922.1:chr17:57287648:+	1,1	+
chr19	50902160	50902161	ENSG00000062822.8:ENST00000599857.1:chr19:50902160:+	2,5	+
chr19	50917065	50917066	ENSG00000062822.8:ENST00000599857.1:chr19:50917065:+	2,5	+
chr3	124456484	124456485	ENSG00000114491.9:ENST00000232607.2:chr3:124456484:+	1,53	+
chr3	172482208	172482209	ENSG00000114346.9:ENST00000232458.5:chr3:172482208:+	1,73	+
chr5	37330183	37330184	ENSG00000113569.11:ENST00000231498.3:chr5:37330183:-	1,29	-
chr5	37294530	37294531	ENSG00000113569.11:ENST00000231498.3:chr5:37294530:-	1,17	-
chr5	167924287	167924288	ENSG00000113643.4:ENST00000231572.3:chr5:167924287:+	1120	+
chr5	167944871	167944872	ENSG00000113643.4:ENST00000231572.3:chr5:167944871:+	1114	+
chr6	153304057	153304058	ENSG00000112029.5:ENST00000229758.3:chr6:153304057:-	1,74	-
chr6	153296495	153296496	ENSG00000112029.5:ENST00000229758.3:chr6:153296495:-	1,74	-
chr11	60689366	60689367	ENSG00000110108.5:ENST00000227525.3:chr11:60689366:+	1,71	+
chr11	60689477	60689478	ENSG00000110108.5:ENST00000227525.3:chr11:60689477:+	1,71	+
chr11	102221344	102221345	ENSG00000110330.4:ENST00000227758.2:chr11:102221344:+	1,42	+
chr11	102239121	102239122	ENSG00000110330.4:ENST00000227758.2:chr11:102239121:+	1,42	+
chr11	116658226	116658227	ENSG00000109917.6:ENST00000227322.3:chr11:116658226:-	1,43	-
chr11	116656338	116656339	ENSG00000109917.6:ENST00000227322.3:chr11:116656338:-	1,44	-
chr12	69119568	69119569	ENSG00000111581.5:ENST00000229179.4:chr12:69119568:+	1,50	+
chr12	96410828	96410829	ENSG00000111144.5:ENST00000228740.2:chr12:96410828:-	1,51	-
chr12	96640839	96640840	ENSG00000111145.3:ENST00000228741.3:chr12:96640839:+	1,11	+
chr12	108145388	108145389	ENSG00000110851.7:ENST00000228437.5:chr12:108145388:-	1,25	-
chr12	108145669	108145670	ENSG00000110851.7:ENST00000228437.5:chr12:108145669:-	1,25	-
chr12	108128005	108128006	ENSG00000110851.7:ENST00000228437.5:chr12:108128005:-	1,28	-
chr12	109898570	109898571	ENSG00000110906.8:ENST00000228495.6:chr12:109898570:-	1,32	-
chr12	109895838	109895839	ENSG00000110906.8:ENST00000228495.6:chr12:109895838:-	1,32	-
chr12	121125165	121125166	ENSG00000110917.3:ENST00000228506.3:chr12:121125165:+	1,28	+
chr12	121125310	121125311	ENSG00000110917.3:ENST00000228506.3:chr12:121125310:+	1,28	+
chr12	121131925	121131926	ENSG00000110917.3:ENST00000228506.3:chr12:121131925:+	1,29	+
chr1	24080670	24080671	ENSG00000011007.8:ENST00000418390.2:chr1:24080670:+	1,62	+
chr1	171675524	171675525	ENSG00000117533.10:ENST00000415773.1:chr1:171675524:-	1,1	-
chr2	200213707	200213708	ENSG00000119042.12:ENST00000417098.1:chr2:200213707:-	1,7	-
chr2	201764112	201764113	ENSG00000196290.10:ENST00000416651.1:chr2:201764112:+	1,6	+
chr3	45488400	45488401	ENSG00000011376.5:ENST00000415258.1:chr3:45488400:+	1,4	+
chr19	11145640	11145641	ENSG00000127616.13:ENST00000413806.3:chr19:11145640:+	1,8	+
chr19	11145641	11145642	ENSG00000127616.13:ENST00000413806.3:chr19:11145641:+	1,8	+
chr19	23405901	23405902	ENSG00000196081.5:ENST00000418100.1:chr19:23405901:-	1,3	-
chr19	55560057	55560058	ENSG00000160439.11:ENST00000415061.3:chr19:55560057:-	1,14	-
chr11	122930672	122930673	ENSG00000109971.9:ENST00000534624.1:chr11:122930672:-	1156	-
chr11	134093757	134093758	ENSG00000151503.8:ENST00000534548.2:chr11:134093757:-	1,69	-
chr11	134076548	134076549	ENSG00000151503.8:ENST00000534548.2:chr11:134076548:-	1,75	-
chr11	134073796	134073797	ENSG00000151503.8:ENST00000534548.2:chr11:134073796:-	1,77	-
chr11	134037962	134037963	ENSG00000151503.8:ENST00000534548.2:chr11:134037962:-	1,84	-
chr11	134031725	134031726	ENSG00000151503.8:ENST00000534548.2:chr11:134031725:-	1,84	-
chr11	134212690	134212691	ENSG00000149328.10:ENST00000535456.2:chr11:134212690:+	1,14	+
chr12	1009668	1009669	ENSG00000060237.12:ENST00000535572.1:chr12:1009668:+	1,1	+
chr12	1017196	1017197	ENSG00000060237.12:ENST00000535572.1:chr12:1017196:+	1,1	+
chr12	6670101	6670102	ENSG00000111641.6:ENST00000541778.1:chr12:6670101:-	1,38	-
chr12	29474749	29474750	ENSG00000064763.6:ENST00000536681.3:chr12:29474749:+	1,15	+
chr17	62476454	62476455	ENSG00000256525.2:ENST00000539111.2:chr17:62476454:-	1,10	-
chr17	64025275	64025276	ENSG00000154240.12:ENST00000535342.2:chr17:64025275:-	1,3	-
chr19	16513200	16513201	ENSG00000127527.9:ENST00000535753.2:chr19:16513200:-	1,12	-
chr5	149773029	149773030	ENSG00000070814.13:ENST00000427724.2:chr5:149773029:+	1,7	+
chr1	11301679	11301680	ENSG00000198793.8:ENST00000361445.4:chr1:11301679:-	1,5	-
chr1	11276216	11276217	ENSG00000198793.8:ENST00000361445.4:chr1:11276216:-	1,7	-
chr1	11273577	11273578	ENSG00000198793.8:ENST00000361445.4:chr1:11273577:-	1,7	-
chr1	154180069	154180070	ENSG00000143612.14:ENST00000362076.4:chr1:154180069:-	1,3	-
chr1	212216452	212216453	ENSG00000143476.13:ENST00000366991.4:chr1:212216452:+	1,83	+
chr1	212220517	212220518	ENSG00000143476.13:ENST00000366991.4:chr1:212220517:+	1,83	+
chr1	225742763	225742764	ENSG00000154380.12:ENST00000366844.3:chr1:225742763:-	1,6	-
chr1	227946985	227946986	ENSG00000143740.10:ENST00000366759.4:chr1:227946985:+	1,18	+
chr1	227947005	227947006	ENSG00000143740.10:ENST00000366759.4:chr1:227947005:+	1,18	+
chr1	243328922	243328923	ENSG00000143702.11:ENST00000366542.1:chr1:243328922:-	1,4	-
chr6	31614198	31614199	ENSG00000204463.8:ENST00000362049.6:chr6:31614198:-	1,16	-
chr6	31614239	31614240	ENSG00000204463.8:ENST00000362049.6:chr6:31614239:-	1,15	-
chr12	2968740	2968741	ENSG00000111206.8:ENST00000361953.3:chr12:2968740:-	1,11	-
chr14	59798222	59798223	ENSG00000100592.11:ENST00000360909.3:chr14:59798222:+	1,9	+
chr16	74685978	74685979	ENSG00000168411.9:ENST00000361070.4:chr16:74685978:-	1,36	-
chr20	62320910	62320911	ENSG00000258366.3:ENST00000360203.5:chr20:62320910:+	1,3	+
chrX	102004811	102004812	ENSG00000198908.7:ENST00000361229.4:chrX:102004811:+	1,3	+
chrX	102632671	102632672	ENSG00000166681.9:ENST00000361298.4:chrX:102632671:+	1,12	+
chrX	102931532	102931533	ENSG00000123562.12:ENST00000360458.1:chrX:102931532:-	1,47	-
chr2	74605277	74605278	ENSG00000204843.8:ENST00000409240.1:chr2:74605277:-	1,33	-
chr2	74592239	74592240	ENSG00000204843.8:ENST00000409240.1:chr2:74592239:-	1,33	-
chr2	74717487	74717488	ENSG00000115282.15:ENST00000410003.1:chr2:74717487:+	1,2	+
chr2	86408471	86408472	ENSG00000132305.16:ENST00000410111.3:chr2:86408471:-	1,81	-
chr2	86398369	86398370	ENSG00000132305.16:ENST00000410111.3:chr2:86398369:-	1,81	-
chr2	86385772	86385773	ENSG00000132305.16:ENST00000410111.3:chr2:86385772:-	1,81	-
chr2	232577537	232577538	ENSG00000187514.10:ENST00000409115.3:chr2:232577537:+	1133	+
chr2	232577557	232577558	ENSG00000187514.10:ENST00000409115.3:chr2:232577557:+	1133	+
chr4	99358107	99358108	ENSG00000138698.10:ENST00000408927.3:chr4:99358107:+	1,13	+
chr4	154519863	154519864	ENSG00000121210.11:ENST00000409663.3:chr4:154519863:+	1,5	+
chr5	157232956	157232957	ENSG00000113282.9:ENST00000411809.2:chr5:157232956:-	1,56	-
chr10	103917839	103917840	ENSG00000166197.12:ENST00000405356.1:chr10:103917839:+	1,37	+
chr15	41641395	41641396	ENSG00000137804.8:ENST00000414849.2:chr15:41641395:+	1,46	+
chr1	215785224	215785225	ENSG00000136636.8:ENST00000259154.4:chr1:215785224:+	1,23	+
chr2	27357247	27357248	ENSG00000138073.9:ENST00000260643.2:chr2:27357247:-	1,64	-
chr2	27355153	27355154	ENSG00000138073.9:ENST00000260643.2:chr2:27355153:-	1,64	-
chr2	44222989	44222990	ENSG00000138095.14:ENST00000260665.7:chr2:44222989:-	1113	-
chr2	44201306	44201307	ENSG00000138095.14:ENST00000260665.7:chr2:44201306:-	1122	-
chr2	44175325	44175326	ENSG00000138095.14:ENST00000260665.7:chr2:44175325:-	1123	-
chr2	44126737	44126738	ENSG00000138095.14:ENST00000260665.7:chr2:44126737:-	1126	-
chr2	44116918	44116919	ENSG00000138095.14:ENST00000260665.7:chr2:44116918:-	2126	-
chr2	65473781	65473782	ENSG00000138071.9:ENST00000260641.5:chr2:65473781:+	1120	+
chr2	65480870	65480871	ENSG00000138071.9:ENST00000260641.5:chr2:65480870:+	1122	+
chr2	65488392	65488393	ENSG00000138071.9:ENST00000260641.5:chr2:65488392:+	1123	+
chr2	128774083	128774084	ENSG00000136715.13:ENST00000259235.3:chr2:128774083:-	1,3	-
chr2	170471228	170471229	ENSG00000138398.11:ENST00000260970.3:chr2:170471228:+	1,26	+
chr2	170493676	170493677	ENSG00000138398.11:ENST00000260970.3:chr2:170493676:+	1,6	+
chr2	190531157	190531158	ENSG00000138381.5:ENST00000260952.4:chr2:190531157:+	1,40	+
chr2	190531585	190531586	ENSG00000138381.5:ENST00000260952.4:chr2:190531585:+	1,40	+
chr2	190535196	190535197	ENSG00000138381.5:ENST00000260952.4:chr2:190535196:+	1,40	+
chr2	203776163	203776164	ENSG00000138442.5:ENST00000261015.4:chr2:203776163:-	1,67	-
chr2	203757391	203757392	ENSG00000138442.5:ENST00000261015.4:chr2:203757391:-	1,67	-
chr3	132218098	132218099	ENSG00000138246.11:ENST00000260818.6:chr3:132218098:+	1,8	+
chr3	132230049	132230050	ENSG00000138246.11:ENST00000260818.6:chr3:132230049:+	1,9	+
chr3	133347433	133347434	ENSG00000163781.8:ENST00000260810.5:chr3:133347433:-	1,38	-
chr3	133342924	133342925	ENSG00000163781.8:ENST00000260810.5:chr3:133342924:-	1,39	-
chr5	64872712	64872713	ENSG00000113593.7:ENST00000261308.5:chr5:64872712:+	1,57	+
chr5	64880873	64880874	ENSG00000113593.7:ENST00000261308.5:chr5:64880873:+	1,57	+
chr8	55047852	55047853	ENSG00000137547.4:ENST00000260102.4:chr8:55047852:+	1,11	+
chr8	124054234	124054235	ENSG00000136986.5:ENST00000259512.4:chr8:124054234:-	1,26	-
chr9	6014865	6014866	ENSG00000137040.8:ENST00000259569.5:chr9:6014865:-	1,23	-
chr10	94392368	94392369	ENSG00000138160.4:ENST00000260731.3:chr10:94392368:+	1,12	+
chr10	94408061	94408062	ENSG00000138160.4:ENST00000260731.3:chr10:94408061:+	1,13	+
chr11	113686017	113686018	ENSG00000048028.7:ENST00000260188.5:chr11:113686017:-	1,20	-
chr12	14949887	14949888	ENSG00000084463.3:ENST00000261167.2:chr12:14949887:-	1107	-
chr12	14946749	14946750	ENSG00000084463.3:ENST00000261167.2:chr12:14946749:-	1107	-
chr12	14943397	14943398	ENSG00000084463.3:ENST00000261167.2:chr12:14943397:-	1106	-
chr12	14943659	14943660	ENSG00000084463.3:ENST00000261167.2:chr12:14943659:-	1106	-
chr12	14941932	14941933	ENSG00000084463.3:ENST00000261167.2:chr12:14941932:-	1106	-
chr12	14941968	14941969	ENSG00000084463.3:ENST00000261167.2:chr12:14941968:-	1106	-
chr14	90734612	90734613	ENSG00000100764.9:ENST00000261303.8:chr14:90734612:+	2,63	+
chr14	90734673	90734674	ENSG00000100764.9:ENST00000261303.8:chr14:90734673:+	1,63	+
chr15	71305223	71305224	ENSG00000137821.7:ENST00000260382.5:chr15:71305223:+	1,10	+
chr15	78789574	78789575	ENSG00000136381.8:ENST00000258886.8:chr15:78789574:+	1,34	+
chr17	48557039	48557040	ENSG00000136444.5:ENST00000258955.2:chr17:48557039:+	1,40	+
chr1	100349695	100349696	ENSG00000162688.11:ENST00000361915.3:chr1:100349695:+	1,29	+
chr1	100361849	100361850	ENSG00000162688.11:ENST00000361915.3:chr1:100361849:+	1,28	+
chr1	153642675	153642676	ENSG00000143621.12:ENST00000361891.4:chr1:153642675:-	1107	-
chr1	153641017	153641018	ENSG00000143621.12:ENST00000361891.4:chr1:153641017:-	1108	-
chr1	153641021	153641022	ENSG00000143621.12:ENST00000361891.4:chr1:153641021:-	1108	-
chr1	153635229	153635230	ENSG00000143621.12:ENST00000361891.4:chr1:153635229:-	1109	-
chr1	156246962	156246963	ENSG00000198952.7:ENST00000361813.5:chr1:156246962:-	1,34	-
chr1	171753337	171753338	ENSG00000010165.15:ENST00000361735.3:chr1:171753337:+	1,53	+
chr1	171755046	171755047	ENSG00000010165.15:ENST00000361735.3:chr1:171755046:+	1,53	+
chr1	173819489	173819490	ENSG00000117593.8:ENST00000361951.4:chr1:173819489:+	1,59	+
chr1	173822644	173822645	ENSG00000117593.8:ENST00000361951.4:chr1:173822644:+	1,59	+
chr1	201837915	201837916	ENSG00000198700.5:ENST00000361565.4:chr1:201837915:+	1,87	+
chr1	201843429	201843430	ENSG00000198700.5:ENST00000361565.4:chr1:201843429:+	1,87	+
chr1	231386799	231386800	ENSG00000116906.7:ENST00000366647.4:chr1:231386799:+	1108	+
chr1	231398524	231398525	ENSG00000116906.7:ENST00000366647.4:chr1:231398524:+	1110	+
chr1	231401814	231401815	ENSG00000116906.7:ENST00000366647.4:chr1:231401814:+	1110	+
chr1	231401822	231401823	ENSG00000116906.7:ENST00000366647.4:chr1:231401822:+	1110	+
chr1	231409729	231409730	ENSG00000116906.7:ENST00000366647.4:chr1:231409729:+	1110	+
chr1	231409778	231409779	ENSG00000116906.7:ENST00000366647.4:chr1:231409778:+	1110	+
chr1	231409805	231409806	ENSG00000116906.7:ENST00000366647.4:chr1:231409805:+	1110	+
chr1	231556747	231556748	ENSG00000135766.8:ENST00000366641.3:chr1:231556747:-	1,56	-
chr1	235285648	235285649	ENSG00000173726.6:ENST00000366607.4:chr1:235285648:-	1109	-
chr1	236766628	236766629	ENSG00000119285.6:ENST00000366582.3:chr1:236766628:-	1,79	-
chr1	236746372	236746373	ENSG00000119285.6:ENST00000366582.3:chr1:236746372:-	1,94	-
chr1	236716999	236717000	ENSG00000119285.6:ENST00000366582.3:chr1:236716999:-	1,93	-
chr1	236715393	236715394	ENSG00000119285.6:ENST00000366582.3:chr1:236715393:-	1,93	-
chr1	236978927	236978928	ENSG00000116984.8:ENST00000366577.5:chr1:236978927:+	1,20	+
chr1	237057673	237057674	ENSG00000116984.8:ENST00000366577.5:chr1:237057673:+	1,18	+
chr1	241667378	241667379	ENSG00000091483.6:ENST00000366560.3:chr1:241667378:-	1,22	-
chr1	242023931	242023932	ENSG00000174371.12:ENST00000366548.3:chr1:242023931:+	1,25	+
chr1	244574641	244574642	ENSG00000035687.9:ENST00000366535.3:chr1:244574641:-	1,61	-
chr10	5948516	5948517	ENSG00000134452.15:ENST00000362091.4:chr10:5948516:+	1,28	+
chr10	70748745	70748746	ENSG00000198954.4:ENST00000361983.4:chr10:70748745:+	1,78	+
chr10	112350317	112350318	ENSG00000108055.9:ENST00000361804.4:chr10:112350317:+	1,92	+
chr10	112361816	112361817	ENSG00000108055.9:ENST00000361804.4:chr10:112361816:+	1,97	+
chr10	112363038	112363039	ENSG00000108055.9:ENST00000361804.4:chr10:112363038:+	1,96	+
chr14	77580187	77580188	ENSG00000198894.3:ENST00000361786.2:chr14:77580187:+	1,17	+
chr14	77580270	77580271	ENSG00000198894.3:ENST00000361786.2:chr14:77580270:+	1,17	+
chr14	77580408	77580409	ENSG00000198894.3:ENST00000361786.2:chr14:77580408:+	1,17	+
chr15	32908489	32908490	ENSG00000198826.6:ENST00000361627.3:chr15:32908489:+	1,33	+
chr15	32908528	32908529	ENSG00000198826.6:ENST00000361627.3:chr15:32908528:+	1,34	+
chr15	32916622	32916623	ENSG00000198826.6:ENST00000361627.3:chr15:32916622:+	1,34	+
chrM	6134	6135	ENSG00000198804.2:ENST00000361624.2:chrM:6134:+	1,60	+
chrM	6325	6326	ENSG00000198804.2:ENST00000361624.2:chrM:6325:+	1,61	+
chrM	12700	12701	ENSG00000198786.2:ENST00000361567.2:chrM:12700:+	1,2	+
chrM	12801	12802	ENSG00000198786.2:ENST00000361567.2:chrM:12801:+	2,2	+
chr1	1247259	1247260	ENSG00000127054.14:ENST00000435064.1:chr1:1247259:-	1,14	-
chr1	16893722	16893723	ENSG00000219481.6:ENST00000430580.2:chr1:16893722:-	1,1	-
chr1	16893744	16893745	ENSG00000219481.6:ENST00000430580.2:chr1:16893744:-	1,1	-
chr1	16892906	16892907	ENSG00000219481.6:ENST00000430580.2:chr1:16892906:-	1,1	-
chr1	39457163	39457164	ENSG00000174574.11:ENST00000432648.3:chr1:39457163:+	1131	+
chr1	39469075	39469076	ENSG00000174574.11:ENST00000432648.3:chr1:39469075:+	1131	+
chr1	40557003	40557004	ENSG00000131238.12:ENST00000433473.3:chr1:40557003:-	1178	-
chr1	40557047	40557048	ENSG00000131238.12:ENST00000433473.3:chr1:40557047:-	1177	-
chr2	70502169	70502170	ENSG00000116005.7:ENST00000433351.2:chr2:70502169:+	1,47	+
chr3	78735014	78735015	ENSG00000169855.15:ENST00000436010.2:chr3:78735014:-	1,17	-
chr3	78710241	78710242	ENSG00000169855.15:ENST00000436010.2:chr3:78710241:-	1,17	-
chr5	72364570	72364571	ENSG00000157107.9:ENST00000430046.2:chr5:72364570:+	1,12	+
chr7	56140749	56140750	ENSG00000129103.13:ENST00000434526.2:chr7:56140749:+	1,20	+
chr7	129122864	129122865	ENSG00000128578.5:ENST00000435494.2:chr7:129122864:+	1,4	+
chr9	37541342	37541343	ENSG00000147912.8:ENST00000432825.2:chr9:37541342:-	1,5	-
chr11	34182608	34182609	ENSG00000166016.4:ENST00000435224.2:chr11:34182608:-	1,4	-
chr11	94532722	94532723	ENSG00000166025.13:ENST00000433060.2:chr11:94532722:+	1,9	+
chr15	65983292	65983293	ENSG00000174485.10:ENST00000431932.2:chr15:65983292:-	1,6	-
chr16	11980419	11980420	ENSG00000103342.8:ENST00000434724.2:chr16:11980419:-	1,83	-
chr19	34699842	34699843	ENSG00000257103.4:ENST00000433627.5:chr19:34699842:+	1,10	+
chr1	155034774	155034775	ENSG00000143537.9:ENST00000271836.6:chr1:155034774:+	1,9	+
chr1	206785680	206785681	ENSG00000143486.11:ENST00000271764.2:chr1:206785680:-	1,10	-
chr1	206784686	206784687	ENSG00000143486.11:ENST00000271764.2:chr1:206784686:-	1,10	-
chr2	10937231	10937232	ENSG00000143870.8:ENST00000272227.3:chr2:10937231:-	1206	-
chr2	10930950	10930951	ENSG00000143870.8:ENST00000272227.3:chr2:10930950:-	1206	-
chr2	10925108	10925109	ENSG00000143870.8:ENST00000272227.3:chr2:10925108:-	2206	-
chr2	10924451	10924452	ENSG00000143870.8:ENST00000272227.3:chr2:10924451:-	1206	-
chr15	90118866	90118867	ENSG00000140534.9:ENST00000268138.7:chr15:90118866:+	4,5	+
chr15	91422983	91422984	ENSG00000140564.6:ENST00000268171.3:chr15:91422983:+	1,1	+
chr16	8844391	8844392	ENSG00000183044.7:ENST00000268251.8:chr16:8844391:+	1,2	+
chr16	72134360	72134361	ENSG00000140829.7:ENST00000268482.3:chr16:72134360:+	1,32	+
chr16	88889030	88889031	ENSG00000141012.8:ENST00000268695.5:chr16:88889030:-	1,6	-
chr16	88889101	88889102	ENSG00000141012.8:ENST00000268695.5:chr16:88889101:-	1,6	-
chr18	12363831	12363832	ENSG00000141385.5:ENST00000269143.3:chr18:12363831:-	1,58	-
chr18	21104411	21104412	ENSG00000141452.5:ENST00000269221.3:chr18:21104411:+	1,28	+
chr19	4792388	4792389	ENSG00000141965.3:ENST00000269856.3:chr19:4792388:+	1,56	+
chr19	15465834	15465835	ENSG00000105127.4:ENST00000269701.2:chr19:15465834:-	1,18	-
chr21	34721727	34721728	ENSG00000142166.8:ENST00000270139.3:chr21:34721727:+	1,27	+
chr1	92185707	92185708	ENSG00000069702.6:ENST00000212355.4:chr1:92185707:-	1,18	-
chr1	92177803	92177804	ENSG00000069702.6:ENST00000212355.4:chr1:92177803:-	1,19	-
chr6	31616476	31616477	ENSG00000204463.8:ENST00000211379.5:chr6:31616476:-	1,13	-
chr7	6089636	6089637	ENSG00000086232.8:ENST00000199389.6:chr7:6089636:-	1122	-
chr7	6078191	6078192	ENSG00000086232.8:ENST00000199389.6:chr7:6078191:-	2123	-
chr11	113610000	113610001	ENSG00000086827.4:ENST00000200135.3:chr11:113610000:-	1,56	-
chr12	6861139	6861140	ENSG00000089693.6:ENST00000203630.5:chr12:6861139:-	1,30	-
chr12	112846049	112846050	ENSG00000089009.11:ENST00000202773.9:chr12:112846049:-	1,12	-
chr14	21836561	21836562	ENSG00000092201.5:ENST00000216297.2:chr14:21836561:-	1184	-
chr14	21829320	21829321	ENSG00000092201.5:ENST00000216297.2:chr14:21829320:-	1166	-
chr14	21829043	21829044	ENSG00000092201.5:ENST00000216297.2:chr14:21829043:-	1167	-
chr14	21828587	21828588	ENSG00000092201.5:ENST00000216297.2:chr14:21828587:-	1167	-
chr14	31085720	31085721	ENSG00000092140.10:ENST00000206595.6:chr14:31085720:+	1,30	+
chr14	62229228	62229229	ENSG00000023608.4:ENST00000216294.4:chr14:62229228:+	1,9	+
chr14	96998951	96998952	ENSG00000090060.13:ENST00000216277.8:chr14:96998951:+	1264	+
chr17	38449721	38449722	ENSG00000094804.5:ENST00000209728.4:chr17:38449721:+	1104	+
chr17	38457239	38457240	ENSG00000094804.5:ENST00000209728.4:chr17:38457239:+	1105	+
chr19	1091833	1091834	ENSG00000099817.7:ENST00000215587.7:chr19:1091833:-	1,12	-
chr19	14676568	14676569	ENSG00000099797.7:ENST00000215567.5:chr19:14676568:+	4,4	+
chr22	22160269	22160270	ENSG00000100030.10:ENST00000215832.6:chr22:22160269:-	1,81	-
chr22	22143029	22143030	ENSG00000100030.10:ENST00000215832.6:chr22:22143029:-	1,83	-
chr22	26838476	26838477	ENSG00000128203.6:ENST00000215906.5:chr22:26838476:+	1,3	+
chr22	32792149	32792150	ENSG00000100220.7:ENST00000216038.5:chr22:32792149:-	1,88	-
chr22	35799512	35799513	ENSG00000100297.11:ENST00000216122.4:chr22:35799512:+	1,99	+
chr22	35802647	35802648	ENSG00000100297.11:ENST00000216122.4:chr22:35802647:+	1,99	+
chr22	35804449	35804450	ENSG00000100297.11:ENST00000216122.4:chr22:35804449:+	1,99	+
chr22	35804450	35804451	ENSG00000100297.11:ENST00000216122.4:chr22:35804450:+	1,99	+
chr22	35815960	35815961	ENSG00000100297.11:ENST00000216122.4:chr22:35815960:+	1,99	+
chr22	35819276	35819277	ENSG00000100297.11:ENST00000216122.4:chr22:35819276:+	1,99	+
chr22	36737445	36737446	ENSG00000100345.16:ENST00000216181.5:chr22:36737445:-	1,16	-
chr22	36914840	36914841	ENSG00000100353.13:ENST00000216190.8:chr22:36914840:-	1,94	-
chr22	38055177	38055178	ENSG00000241360.1:ENST00000215904.6:chr22:38055177:+	1,10	+
chr22	39112901	39112902	ENSG00000100226.11:ENST00000216044.5:chr22:39112901:+	1,23	+
chr22	39122333	39122334	ENSG00000100226.11:ENST00000216044.5:chr22:39122333:+	3,26	+
chr22	39826020	39826021	ENSG00000100324.9:ENST00000216160.6:chr22:39826020:+	1,31	+
chr22	40745903	40745904	ENSG00000239900.7:ENST00000216194.7:chr22:40745903:+	1,51	+
chr22	41252512	41252513	ENSG00000100380.8:ENST00000216218.3:chr22:41252512:-	1121	-
chr22	41223228	41223229	ENSG00000100380.8:ENST00000216218.3:chr22:41223228:-	1122	-
chr22	41911889	41911890	ENSG00000100412.11:ENST00000216254.4:chr22:41911889:+	1,94	+
chr22	43575658	43575659	ENSG00000100304.12:ENST00000216129.6:chr22:43575658:-	1,38	-
chr22	50280126	50280127	ENSG00000100426.6:ENST00000216268.5:chr22:50280126:+	1,22	+
chr2	29136962	29136963	ENSG00000163811.7:ENST00000407426.3:chr2:29136962:+	1,28	+
chr2	182403850	182403851	ENSG00000188452.9:ENST00000410087.3:chr2:182403850:-	1,1	-
chr2	182787076	182787077	ENSG00000138434.12:ENST00000409001.1:chr2:182787076:+	1,1	+
chr2	201681894	201681895	ENSG00000082153.13:ENST00000409600.1:chr2:201681894:+	1197	+
chr2	201684723	201684724	ENSG00000082153.13:ENST00000409600.1:chr2:201684723:+	1196	+
chr2	201684811	201684812	ENSG00000082153.13:ENST00000409600.1:chr2:201684811:+	1196	+
chr2	201684830	201684831	ENSG00000082153.13:ENST00000409600.1:chr2:201684830:+	1196	+
chr2	202492094	202492095	ENSG00000155755.14:ENST00000409444.2:chr2:202492094:-	1,25	-
chr2	220086824	220086825	ENSG00000198925.6:ENST00000409618.1:chr2:220086824:-	1,4	-
chr2	234750080	234750081	ENSG00000123485.7:ENST00000411486.2:chr2:234750080:-	1,33	-
chr4	15646253	15646254	ENSG00000118564.10:ENST00000412094.2:chr4:15646253:-	1,2	-
chr5	122515954	122515955	ENSG00000061455.10:ENST00000407847.4:chr5:122515954:+	1,8	+
chr9	134073703	134073704	ENSG00000126883.12:ENST00000411637.2:chr9:134073703:+	1,3	+
chr9	134077057	134077058	ENSG00000126883.12:ENST00000411637.2:chr9:134077057:+	1,3	+
chr15	90764287	90764288	ENSG00000185033.10:ENST00000411539.2:chr15:90764287:+	1,1	+
chr19	8032603	8032604	ENSG00000066044.9:ENST00000407627.2:chr19:8032603:-	1157	-
chr22	26890806	26890807	ENSG00000100109.12:ENST00000407690.1:chr22:26890806:-	1,31	-
chr22	38270382	38270383	ENSG00000100129.13:ENST00000412331.2:chr22:38270382:+	1100	+
chr1	52257267	52257268	ENSG00000078618.15:ENST00000354831.7:chr1:52257267:-	1,6	-
chr1	116206775	116206776	ENSG00000173218.10:ENST00000355485.2:chr1:116206775:+	1,21	+
chr1	236388435	236388436	ENSG00000086619.9:ENST00000354619.5:chr1:236388435:-	1,7	-
chr4	3213862	3213863	ENSG00000197386.6:ENST00000355072.5:chr4:3213862:+	1,4	+
chr4	83278031	83278032	ENSG00000138668.14:ENST00000353341.4:chr4:83278031:-	1,28	-
chr5	40764997	40764998	ENSG00000132356.7:ENST00000354209.3:chr5:40764997:-	1,1	-
chr5	176860162	176860163	ENSG00000198055.6:ENST00000355472.5:chr5:176860162:+	1,39	+
chr5	179320408	179320409	ENSG00000197226.8:ENST00000355235.3:chr5:179320408:-	1,38	-
chr5	179305496	179305497	ENSG00000197226.8:ENST00000355235.3:chr5:179305496:-	1,43	-
chr6	86324811	86324812	ENSG00000135316.13:ENST00000355238.6:chr6:86324811:-	1,54	-
chr7	73609165	73609166	ENSG00000106682.10:ENST00000353999.6:chr7:73609165:+	1224	+
chr7	73609549	73609550	ENSG00000106682.10:ENST00000353999.6:chr7:73609549:+	1224	+
chr7	73609616	73609617	ENSG00000106682.10:ENST00000353999.6:chr7:73609616:+	1224	+
chr7	127292487	127292488	ENSG00000197157.6:ENST00000354725.3:chr7:127292487:+	1,86	+
chr7	127334965	127334966	ENSG00000197157.6:ENST00000354725.3:chr7:127334965:+	1,88	+
chr7	127342492	127342493	ENSG00000197157.6:ENST00000354725.3:chr7:127342492:+	1,89	+
chr7	151842305	151842306	ENSG00000055609.13:ENST00000355193.2:chr7:151842305:-	1,3	-
chr7	156556446	156556447	ENSG00000105983.15:ENST00000353442.5:chr7:156556446:-	1,32	-
chr8	57129897	57129898	ENSG00000170791.13:ENST00000355315.3:chr8:57129897:+	1,4	+
chr8	80679868	80679869	ENSG00000164683.12:ENST00000354724.3:chr8:80679868:-	1162	-
chr8	80677889	80677890	ENSG00000164683.12:ENST00000354724.3:chr8:80677889:-	1187	-
chr9	35736466	35736467	ENSG00000107175.6:ENST00000353704.2:chr9:35736466:+	1,5	+
chr9	100193259	100193260	ENSG00000196116.6:ENST00000355295.4:chr9:100193259:+	1,8	+
chr10	70719832	70719833	ENSG00000165732.8:ENST00000354185.4:chr10:70719832:+	1113	+
chr11	13729591	13729592	ENSG00000197601.8:ENST00000354817.3:chr11:13729591:+	1,44	+
chr11	13743341	13743342	ENSG00000197601.8:ENST00000354817.3:chr11:13743341:+	1,44	+
chr11	71146854	71146855	ENSG00000172893.11:ENST00000355527.3:chr11:71146854:-	1,37	-
chr12	62797990	62797991	ENSG00000135655.9:ENST00000353364.3:chr12:62797990:+	1,11	+
chr12	62798038	62798039	ENSG00000135655.9:ENST00000353364.3:chr12:62798038:+	1,11	+
chr14	23891492	23891493	ENSG00000092054.12:ENST00000355349.3:chr14:23891492:-	1,1	-
chr15	91312693	91312694	ENSG00000197299.6:ENST00000355112.3:chr15:91312693:+	1,39	+
chr19	50304800	50304801	ENSG00000196961.8:ENST00000354293.5:chr19:50304800:+	1,14	+
chr22	21272280	21272281	ENSG00000099942.8:ENST00000354336.3:chr22:21272280:+	1,66	+
chr22	30977544	30977545	ENSG00000100029.13:ENST00000354694.7:chr22:30977544:-	1,66	-
chr22	30976066	30976067	ENSG00000100029.13:ENST00000354694.7:chr22:30976066:-	1,64	-
chrX	106236512	106236513	ENSG00000133131.10:ENST00000355610.4:chrX:106236512:-	1,12	-
chr3	158362475	158362476	ENSG00000168827.10:ENST00000486715.1:chr3:158362475:+	1,46	+
chr5	72185638	72185639	ENSG00000083312.13:ENST00000506351.2:chr5:72185638:+	1,20	+
chr5	72192336	72192337	ENSG00000083312.13:ENST00000506351.2:chr5:72192336:+	1,20	+
chr5	110446577	110446578	ENSG00000134987.7:ENST00000506538.2:chr5:110446577:+	1,53	+
chr5	110456281	110456282	ENSG00000134987.7:ENST00000506538.2:chr5:110456281:+	1,53	+
chr5	110456818	110456819	ENSG00000134987.7:ENST00000506538.2:chr5:110456818:+	1,53	+
chr5	110459574	110459575	ENSG00000134987.7:ENST00000506538.2:chr5:110459574:+	1,53	+
chr5	145613211	145613212	ENSG00000091009.6:ENST00000506502.1:chr5:145613211:+	1,4	+
chr6	42976953	42976954	ENSG00000112640.10:ENST00000485511.1:chr6:42976953:+	1,16	+
chr6	42977136	42977137	ENSG00000112640.10:ENST00000485511.1:chr6:42977136:+	1,16	+
chr10	13213216	13213217	ENSG00000065328.12:ENST00000484800.2:chr10:13213216:+	1,6	+
chr19	35175228	35175229	ENSG00000089335.16:ENST00000505242.1:chr19:35175228:+	1,3	+
chr1	3699257	3699258	ENSG00000130764.5:ENST00000378251.1:chr1:3699257:-	1,54	-
chr1	6614338	6614339	ENSG00000162408.10:ENST00000377705.5:chr1:6614338:-	1,14	-
chr1	6700089	6700090	ENSG00000007923.11:ENST00000377577.5:chr1:6700089:-	1,71	-
chr1	6697272	6697273	ENSG00000007923.11:ENST00000377577.5:chr1:6697272:-	1,71	-
chr1	10163013	10163014	ENSG00000130939.14:ENST00000377157.3:chr1:10163013:+	1,16	+
chr1	10197244	10197245	ENSG00000130939.14:ENST00000377157.3:chr1:10197244:+	1,18	+
chr8	120810067	120810068	ENSG00000064313.7:ENST00000378164.2:chr8:120810067:-	1,48	-
chr8	120744232	120744233	ENSG00000064313.7:ENST00000378164.2:chr8:120744232:-	1,26	-
chr9	38396065	38396066	ENSG00000137124.6:ENST00000377698.3:chr9:38396065:+	1,88	+
chr9	38396797	38396798	ENSG00000137124.6:ENST00000377698.3:chr9:38396797:+	1,88	+
chr9	38396870	38396871	ENSG00000137124.6:ENST00000377698.3:chr9:38396870:+	1,89	+
chr9	38397247	38397248	ENSG00000137124.6:ENST00000377698.3:chr9:38397247:+	1,89	+
chr10	18948598	18948599	ENSG00000165997.4:ENST00000377275.3:chr10:18948598:+	1,32	+
chr13	67800267	67800268	ENSG00000184226.10:ENST00000377861.3:chr13:67800267:-	1,8	-
chr13	67800527	67800528	ENSG00000184226.10:ENST00000377861.3:chr13:67800527:-	1,8	-
chr13	73284466	73284467	ENSG00000204899.5:ENST00000377818.3:chr13:73284466:-	1,81	-
chr13	73355042	73355043	ENSG00000083520.10:ENST00000377767.4:chr13:73355042:-	1125	-
chr13	73352332	73352333	ENSG00000083520.10:ENST00000377767.4:chr13:73352332:-	1125	-
chr20	21346280	21346281	ENSG00000088930.6:ENST00000377191.3:chr20:21346280:+	1,51	+
chr1	24981554	24981555	ENSG00000133226.12:ENST00000323848.9:chr1:24981554:+	1102	+
chr1	24989245	24989246	ENSG00000133226.12:ENST00000323848.9:chr1:24989245:+	1102	+
chr1	24993386	24993387	ENSG00000133226.12:ENST00000323848.9:chr1:24993386:+	1102	+
chr1	54417799	54417800	ENSG00000116212.10:ENST00000319223.4:chr1:54417799:+	1,5	+
chr2	96957152	96957153	ENSG00000144028.10:ENST00000323853.5:chr2:96957152:-	1,65	-
chr2	96956541	96956542	ENSG00000144028.10:ENST00000323853.5:chr2:96956541:-	1,65	-
chr2	96953668	96953669	ENSG00000144028.10:ENST00000323853.5:chr2:96953668:-	1,72	-
chr2	96951026	96951027	ENSG00000144028.10:ENST00000323853.5:chr2:96951026:-	1,76	-
chr2	96950110	96950111	ENSG00000144028.10:ENST00000323853.5:chr2:96950110:-	1,76	-
chr2	96949684	96949685	ENSG00000144028.10:ENST00000323853.5:chr2:96949684:-	1,76	-
chr2	232327992	232327993	ENSG00000115053.11:ENST00000322723.4:chr2:232327992:-	11084	-
chr2	232326321	232326322	ENSG00000115053.11:ENST00000322723.4:chr2:232326321:-	11128	-
chr2	232326342	232326343	ENSG00000115053.11:ENST00000322723.4:chr2:232326342:-	11127	-
chr2	232326407	232326408	ENSG00000115053.11:ENST00000322723.4:chr2:232326407:-	11115	-
chr2	232326474	232326475	ENSG00000115053.11:ENST00000322723.4:chr2:232326474:-	11105	-
chr2	232325503	232325504	ENSG00000115053.11:ENST00000322723.4:chr2:232325503:-	11138	-
chr2	232324985	232324986	ENSG00000115053.11:ENST00000322723.4:chr2:232324985:-	11151	-
chr2	232324988	232324989	ENSG00000115053.11:ENST00000322723.4:chr2:232324988:-	11151	-
chr2	232323778	232323779	ENSG00000115053.11:ENST00000322723.4:chr2:232323778:-	11151	-
chr2	232320763	232320764	ENSG00000115053.11:ENST00000322723.4:chr2:232320763:-	11139	-
chr2	232320171	232320172	ENSG00000115053.11:ENST00000322723.4:chr2:232320171:-	11139	-
chr2	232319955	232319956	ENSG00000115053.11:ENST00000322723.4:chr2:232319955:-	11139	-
chr2	241666245	241666246	ENSG00000130294.10:ENST00000320389.7:chr2:241666245:-	1,3	-
chr2	241658529	241658530	ENSG00000130294.10:ENST00000320389.7:chr2:241658529:-	1,3	-
chr4	18023282	18023283	ENSG00000178177.10:ENST00000326877.4:chr4:18023282:-	1,4	-
chr5	178996322	178996323	ENSG00000176783.10:ENST00000319449.4:chr5:178996322:+	1,22	+
chr5	179034649	179034650	ENSG00000176783.10:ENST00000319449.4:chr5:179034649:+	1,21	+
chr6	160208781	160208782	ENSG00000120438.7:ENST00000321394.7:chr6:160208781:-	1291	-
chr6	160200988	160200989	ENSG00000120438.7:ENST00000321394.7:chr6:160200988:-	1293	-
chr7	56032359	56032360	ENSG00000146729.5:ENST00000322090.3:chr7:56032359:+	1125	+
chr7	56046046	56046047	ENSG00000146729.5:ENST00000322090.3:chr7:56046046:+	1125	+
chr7	56046079	56046080	ENSG00000146729.5:ENST00000322090.3:chr7:56046079:+	1125	+
chr7	148457490	148457491	ENSG00000055130.11:ENST00000325222.4:chr7:148457490:+	1136	+
chr7	148481124	148481125	ENSG00000055130.11:ENST00000325222.4:chr7:148481124:+	1137	+
chr7	148487483	148487484	ENSG00000055130.11:ENST00000325222.4:chr7:148487483:+	1137	+
chr8	38704323	38704324	ENSG00000147526.15:ENST00000317827.4:chr8:38704323:+	1,6	+
chr11	64030264	64030265	ENSG00000149782.7:ENST00000325234.5:chr11:64030264:+	1,1	+
chr11	64034964	64034965	ENSG00000149782.7:ENST00000325234.5:chr11:64034964:+	1,1	+
chr11	64575551	64575552	ENSG00000133895.10:ENST00000315422.4:chr11:64575551:-	1,10	-
chr16	630195	630196	ENSG00000007541.10:ENST00000321878.5:chr16:630195:+	1,4	+
chr16	723542	723543	ENSG00000140983.9:ENST00000315082.4:chr16:723542:+	1,19	+
chr16	30776807	30776808	ENSG00000103549.17:ENST00000324685.6:chr16:30776807:+	1,55	+
chr19	8509968	8509969	ENSG00000099783.7:ENST00000325495.4:chr19:8509968:+	1107	+
chr19	8536228	8536229	ENSG00000099783.7:ENST00000325495.4:chr19:8536228:+	1111	+
chr22	31583190	31583191	ENSG00000138942.11:ENST00000326132.6:chr22:31583190:+	1,30	+
chr22	31583250	31583251	ENSG00000138942.11:ENST00000326132.6:chr22:31583250:+	1,30	+
chrX	51638218	51638219	ENSG00000179222.13:ENST00000326587.7:chrX:51638218:+	1263	+
chrX	51638333	51638334	ENSG00000179222.13:ENST00000326587.7:chrX:51638333:+	1263	+
chrX	51638744	51638745	ENSG00000179222.13:ENST00000326587.7:chrX:51638744:+	1263	+
chrX	51638747	51638748	ENSG00000179222.13:ENST00000326587.7:chrX:51638747:+	1261	+
chrX	51639623	51639624	ENSG00000179222.13:ENST00000326587.7:chrX:51639623:+	1263	+
chrX	51639652	51639653	ENSG00000179222.13:ENST00000326587.7:chrX:51639652:+	1263	+
chrX	51640919	51640920	ENSG00000179222.13:ENST00000326587.7:chrX:51640919:+	1263	+
chrX	51643289	51643290	ENSG00000179222.13:ENST00000326587.7:chrX:51643289:+	1263	+
chrX	51644764	51644765	ENSG00000179222.13:ENST00000326587.7:chrX:51644764:+	1263	+
chrX	51644917	51644918	ENSG00000179222.13:ENST00000326587.7:chrX:51644917:+	1263	+
chr1	16719921	16719922	ENSG00000055070.12:ENST00000401089.3:chr1:16719921:+	1,45	+
chr2	61344513	61344514	ENSG00000162929.9:ENST00000402291.1:chr2:61344513:+	1,3	+
chr2	61721150	61721151	ENSG00000082898.12:ENST00000401558.2:chr2:61721150:-	1120	-
chr2	61721200	61721201	ENSG00000082898.12:ENST00000401558.2:chr2:61721200:-	1120	-
chr2	61709531	61709532	ENSG00000082898.12:ENST00000401558.2:chr2:61709531:-	1118	-
chr4	184129203	184129204	ENSG00000151718.11:ENST00000403733.3:chr4:184129203:+	1,15	+
chr4	184182284	184182285	ENSG00000151718.11:ENST00000403733.3:chr4:184182284:+	1,15	+
chr7	5256238	5256239	ENSG00000157954.10:ENST00000401525.3:chr7:5256238:+	1,4	+
chr7	72884799	72884800	ENSG00000009954.6:ENST00000404251.1:chr7:72884799:-	1,1	-
chr7	112098968	112098969	ENSG00000006652.9:ENST00000403825.3:chr7:112098968:+	1,63	+
chr9	134322520	134322521	ENSG00000130723.13:ENST00000405995.1:chr9:134322520:+	1,4	+
chr12	98987869	98987870	ENSG00000075415.8:ENST00000401722.3:chr12:98987869:+	1,3	+
chr1	224371106	224371107	ENSG00000143753.8:ENST00000323699.4:chr1:224371106:+	1103	+
chr2	27275972	27275973	ENSG00000084693.11:ENST00000323064.8:chr2:27275972:+	1,14	+
chr3	127823700	127823701	ENSG00000175792.7:ENST00000322623.5:chr3:127823700:-	1,80	-
chr5	139947708	139947709	ENSG00000176087.10:ENST00000323146.3:chr5:139947708:+	1,58	+
chr7	30197066	30197067	ENSG00000180354.11:ENST00000324453.8:chr7:30197066:+	1,1	+
chr9	128003053	128003054	ENSG00000044574.7:ENST00000324460.6:chr9:128003053:-	1428	-
chr9	128003139	128003140	ENSG00000044574.7:ENST00000324460.6:chr9:128003139:-	1428	-
chr9	128001700	128001701	ENSG00000044574.7:ENST00000324460.6:chr9:128001700:-	1433	-
chr9	128001707	128001708	ENSG00000044574.7:ENST00000324460.6:chr9:128001707:-	1433	-
chr9	128001394	128001395	ENSG00000044574.7:ENST00000324460.6:chr9:128001394:-	1435	-
chr9	127999234	127999235	ENSG00000044574.7:ENST00000324460.6:chr9:127999234:-	1435	-
chr9	127999335	127999336	ENSG00000044574.7:ENST00000324460.6:chr9:127999335:-	1435	-
chr9	131455990	131455991	ENSG00000119335.12:ENST00000322030.8:chr9:131455990:+	1153	+
chr11	33163517	33163518	ENSG00000176102.7:ENST00000323959.4:chr11:33163517:-	1,30	-
chr11	33108583	33108584	ENSG00000176102.7:ENST00000323959.4:chr11:33108583:-	1,28	-
chr11	65819983	65819984	ENSG00000087365.10:ENST00000322535.6:chr11:65819983:+	1167	+
chr11	65822573	65822574	ENSG00000087365.10:ENST00000322535.6:chr11:65822573:+	1169	+
chr11	65822641	65822642	ENSG00000087365.10:ENST00000322535.6:chr11:65822641:+	1169	+
chr11	65824404	65824405	ENSG00000087365.10:ENST00000322535.6:chr11:65824404:+	1170	+
chr11	65824762	65824763	ENSG00000087365.10:ENST00000322535.6:chr11:65824762:+	1170	+
chr11	65830992	65830993	ENSG00000087365.10:ENST00000322535.6:chr11:65830992:+	1165	+
chr11	108577485	108577486	ENSG00000178105.5:ENST00000322536.3:chr11:108577485:+	1,67	+
chr12	95889803	95889804	ENSG00000111142.9:ENST00000323666.5:chr12:95889803:+	1139	+
chr14	23395454	23395455	ENSG00000100462.11:ENST00000324366.8:chr14:23395454:-	1124	-
chr14	23394131	23394132	ENSG00000100462.11:ENST00000324366.8:chr14:23394131:-	2124	-
chr14	23391988	23391989	ENSG00000100462.11:ENST00000324366.8:chr14:23391988:-	1124	-
chr17	26925576	26925577	ENSG00000076382.12:ENST00000321765.5:chr17:26925576:-	1,82	-
chr17	26910555	26910556	ENSG00000076382.12:ENST00000321765.5:chr17:26910555:-	1,84	-
chr17	26906780	26906781	ENSG00000076382.12:ENST00000321765.5:chr17:26906780:-	1,83	-
chr17	26906842	26906843	ENSG00000076382.12:ENST00000321765.5:chr17:26906842:-	1,83	-
chr17	26906431	26906432	ENSG00000076382.12:ENST00000321765.5:chr17:26906431:-	1,82	-
chr17	30302565	30302566	ENSG00000178691.6:ENST00000322652.5:chr17:30302565:+	1,9	+
chr17	56569170	56569171	ENSG00000108389.5:ENST00000323456.5:chr17:56569170:-	1,7	-
chr17	73498190	73498191	ENSG00000177303.5:ENST00000321617.3:chr17:73498190:-	1,1	-
chr19	17838528	17838529	ENSG00000130479.6:ENST00000324096.4:chr19:17838528:+	1,12	+
chr19	49477506	49477507	ENSG00000104812.10:ENST00000323798.3:chr19:49477506:-	1,17	-
chr19	49474221	49474222	ENSG00000104812.10:ENST00000323798.3:chr19:49474221:-	1,17	-
chr19	49472566	49472567	ENSG00000104812.10:ENST00000323798.3:chr19:49472566:-	1,17	-
chr19	52719131	52719132	ENSG00000105568.13:ENST00000322088.6:chr19:52719131:+	1101	+
chr19	52729058	52729059	ENSG00000105568.13:ENST00000322088.6:chr19:52729058:+	1104	+
chr20	25002067	25002068	ENSG00000154930.10:ENST00000323482.4:chr20:25002067:-	1,8	-
chrX	53432246	53432247	ENSG00000072501.13:ENST00000322213.4:chrX:53432246:-	1144	-
chrX	53409445	53409446	ENSG00000072501.13:ENST00000322213.4:chrX:53409445:-	1,87	-
chr1	68614268	68614269	ENSG00000116729.9:ENST00000262348.4:chr1:68614268:-	1,30	-
chr1	236141208	236141209	ENSG00000116962.10:ENST00000264187.6:chr1:236141208:-	1,25	-
chr2	27455340	27455341	ENSG00000084774.9:ENST00000264705.4:chr2:27455340:+	1,7	+
chr2	27459322	27459323	ENSG00000084774.9:ENST00000264705.4:chr2:27459322:+	1,8	+
chr2	27462076	27462077	ENSG00000084774.9:ENST00000264705.4:chr2:27462076:+	1,8	+
chr2	113309559	113309560	ENSG00000125630.11:ENST00000263331.5:chr2:113309559:+	1,42	+
chr2	113317059	113317060	ENSG00000125630.11:ENST00000263331.5:chr2:113317059:+	1,42	+
[truncated: 1,030 more rows]

## Sheet: APOBEC1-only_rep3
chr1	52289340	52289341	ENSG00000078618.15:ENST00000352171.7:chr1:52289340:-	1,35	-
chr5	150519774	150519775	ENSG00000197043.9:ENST00000354546.5:chr5:150519774:-	1,30	-
chr7	26236957	26236958	ENSG00000122566.16:ENST00000356674.7:chr7:26236957:-	1108	-
chr7	26237068	26237069	ENSG00000122566.16:ENST00000356674.7:chr7:26237068:-	1108	-
chr10	5495226	5495227	ENSG00000173848.14:ENST00000355029.4:chr10:5495226:+	1,58	+
chr10	5496401	5496402	ENSG00000173848.14:ENST00000355029.4:chr10:5496401:+	1,58	+
chr12	21794960	21794961	ENSG00000111716.8:ENST00000350669.1:chr12:21794960:-	1205	-
chr12	21788499	21788500	ENSG00000111716.8:ENST00000350669.1:chr12:21788499:-	1205	-
chr12	21788585	21788586	ENSG00000111716.8:ENST00000350669.1:chr12:21788585:-	1204	-
chr12	56667572	56667573	ENSG00000062485.14:ENST00000351328.3:chr12:56667572:-	1125	-
chr14	100808830	100808831	ENSG00000140105.13:ENST00000355338.2:chr14:100808830:-	1104	-
chr14	100801355	100801356	ENSG00000140105.13:ENST00000355338.2:chr14:100801355:-	1104	-
chr17	76219585	76219586	ENSG00000089685.10:ENST00000350051.3:chr17:76219585:+	1,72	+
chr20	390620	390621	ENSG00000125826.15:ENST00000356286.5:chr20:390620:+	1,6	+
chr20	61542551	61542552	ENSG00000101191.12:ENST00000354665.4:chr20:61542551:-	1,3	-
chr22	41925312	41925313	ENSG00000100413.12:ENST00000355209.4:chr22:41925312:-	1,16	-
chr1	31440046	31440047	ENSG00000134644.11:ENST00000373747.3:chr1:31440046:-	1,31	-
chr1	115282334	115282335	ENSG00000009307.11:ENST00000339438.6:chr1:115282334:-	1658	-
chr1	115282474	115282475	ENSG00000009307.11:ENST00000339438.6:chr1:115282474:-	1658	-
chr1	115273200	115273201	ENSG00000009307.11:ENST00000339438.6:chr1:115273200:-	1658	-
chr1	115272942	115272943	ENSG00000009307.11:ENST00000339438.6:chr1:115272942:-	1658	-
chr1	115269625	115269626	ENSG00000009307.11:ENST00000339438.6:chr1:115269625:-	1658	-
chr1	115267922	115267923	ENSG00000009307.11:ENST00000339438.6:chr1:115267922:-	1658	-
chr1	207933020	207933021	ENSG00000117335.14:ENST00000367041.1:chr1:207933020:+	1,2	+
chr3	184043646	184043647	ENSG00000114867.15:ENST00000414031.1:chr3:184043646:+	1,2	+
chr5	149751574	149751575	ENSG00000070814.13:ENST00000439160.2:chr5:149751574:+	1,25	+
chr9	128099337	128099338	ENSG00000165219.17:ENST00000495955.1:chr9:128099337:+	1,5	+
chr12	98991779	98991780	ENSG00000075415.8:ENST00000552981.1:chr12:98991779:+	1,50	+
chr12	98992413	98992414	ENSG00000075415.8:ENST00000552981.1:chr12:98992413:+	1,50	+
chr19	41807504	41807505	ENSG00000105323.12:ENST00000595018.1:chr19:41807504:+	1,28	+
chr4	37836324	37836325	ENSG00000169299.9:ENST00000381967.4:chr4:37836324:+	1,14	+
chr6	2245615	2245616	ENSG00000112699.6:ENST00000380815.4:chr6:2245615:-	1,38	-
chr6	2833901	2833902	ENSG00000021355.8:ENST00000380739.5:chr6:2833901:-	1,16	-
chr10	3146126	3146127	ENSG00000067057.12:ENST00000381125.4:chr10:3146126:+	1,53	+
chr12	27951069	27951070	ENSG00000087448.5:ENST00000381271.2:chr12:27951069:+	1,4	+
chr13	24995382	24995383	ENSG00000102699.5:ENST00000381989.3:chr13:24995382:-	1,12	-
chr13	25914139	25914140	ENSG00000139496.11:ENST00000381736.3:chr13:25914139:+	1,10	+
chr13	26911723	26911724	ENSG00000132964.7:ENST00000381527.3:chr13:26911723:+	1,18	+
chr13	26911762	26911763	ENSG00000132964.7:ENST00000381527.3:chr13:26911762:+	1,18	+
chr13	30107019	30107020	ENSG00000139514.8:ENST00000380752.5:chr13:30107019:-	1,39	-
chr13	30093619	30093620	ENSG00000139514.8:ENST00000380752.5:chr13:30093619:-	1,43	-
chr13	30093675	30093676	ENSG00000139514.8:ENST00000380752.5:chr13:30093675:-	1,42	-
chr14	68159291	68159292	ENSG00000072042.8:ENST00000381346.4:chr14:68159291:-	1,66	-
chr22	46685397	46685398	ENSG00000075234.12:ENST00000381031.3:chr22:46685397:+	1,9	+
chrX	2408646	2408647	ENSG00000214717.5:ENST00000381223.4:chrX:2408646:-	1,11	-
chr11	17316997	17316998	ENSG00000070081.11:ENST00000529010.1:chr11:17316997:+	1,7	+
chr11	32608613	32608614	ENSG00000149100.8:ENST00000531120.1:chr11:32608613:+	1,47	+
chr11	46784251	46784252	ENSG00000175216.10:ENST00000529230.1:chr11:46784251:-	1,75	-
chr11	46780955	46780956	ENSG00000175216.10:ENST00000529230.1:chr11:46780955:-	1,78	-
chr11	46772788	46772789	ENSG00000175216.10:ENST00000529230.1:chr11:46772788:-	1,83	-
chr11	75112755	75112756	ENSG00000149273.10:ENST00000531188.1:chr11:75112755:+	1,43	+
chr11	77705667	77705668	ENSG00000149262.12:ENST00000534064.1:chr11:77705667:-	1,31	-
chr11	77618842	77618843	ENSG00000149262.12:ENST00000534064.1:chr11:77618842:-	1,37	-
chr11	77590108	77590109	ENSG00000149262.12:ENST00000534064.1:chr11:77590108:-	1,37	-
chr11	134086957	134086958	ENSG00000151503.8:ENST00000534548.2:chr11:134086957:-	1,31	-
chr11	134073695	134073696	ENSG00000151503.8:ENST00000534548.2:chr11:134073695:-	1,38	-
chr11	134054827	134054828	ENSG00000151503.8:ENST00000534548.2:chr11:134054827:-	1,45	-
chr11	134028337	134028338	ENSG00000151503.8:ENST00000534548.2:chr11:134028337:-	1,47	-
chr15	49170457	49170458	ENSG00000255302.3:ENST00000530028.2:chr15:49170457:+	1,21	+
chr1	3542405	3542406	ENSG00000158109.10:ENST00000378344.2:chr1:3542405:+	1,2	+
chr1	3544998	3544999	ENSG00000158109.10:ENST00000378344.2:chr1:3544998:+	1,2	+
chr8	120844747	120844748	ENSG00000064313.7:ENST00000378164.2:chr8:120844747:-	1,31	-
chr10	13233386	13233387	ENSG00000065328.12:ENST00000378714.3:chr10:13233386:+	1,94	+
chr10	13234354	13234355	ENSG00000065328.12:ENST00000378714.3:chr10:13234354:+	1,94	+
chr16	71950984	71950985	ENSG00000182149.16:ENST00000378798.5:chr16:71950984:+	1,4	+
chr17	33326863	33326864	ENSG00000005156.7:ENST00000378526.4:chr17:33326863:+	1,19	+
chr20	5585045	5585046	ENSG00000125772.8:ENST00000379019.4:chr20:5585045:-	1,9	-
chrX	40464943	40464944	ENSG00000182220.9:ENST00000378438.4:chrX:40464943:+	1,39	+
chr3	139077911	139077912	ENSG00000184432.5:ENST00000333188.5:chr3:139077911:-	1,59	-
chr6	3154255	3154256	ENSG00000137267.5:ENST00000333628.3:chr6:3154255:-	1,21	-
chr10	99186096	99186097	ENSG00000171314.8:ENST00000334828.5:chr10:99186096:+	1160	+
chr10	99190716	99190717	ENSG00000171314.8:ENST00000334828.5:chr10:99190716:+	1164	+
chr10	99192137	99192138	ENSG00000171314.8:ENST00000334828.5:chr10:99192137:+	1165	+
chr11	64138895	64138896	ENSG00000162302.8:ENST00000334205.4:chr11:64138895:+	1,5	+
chr14	61789072	61789073	ENSG00000027075.9:ENST00000332981.5:chr14:61789072:+	1,2	+
chr15	89172585	89172586	ENSG00000181026.13:ENST00000332810.3:chr15:89172585:+	1136	+
chr15	91551186	91551187	ENSG00000184056.10:ENST00000333371.3:chr15:91551186:-	1,7	-
chr17	8370326	8370327	ENSG00000166579.11:ENST00000334527.7:chr17:8370326:+	1,14	+
chr18	34378511	34378512	ENSG00000134779.10:ENST00000334295.4:chr18:34378511:-	1,41	-
chr7	100854909	100854910	ENSG00000106397.7:ENST00000223127.3:chr7:100854909:-	1,24	-
chr8	11683568	11683569	ENSG00000079459.8:ENST00000220584.4:chr8:11683568:+	1,21	+
chr8	24774869	24774870	ENSG00000104722.9:ENST00000221166.5:chr8:24774869:+	1,30	+
chr8	37702133	37702134	ENSG00000104221.8:ENST00000220659.6:chr8:37702133:-	1,6	-
chr8	91013743	91013744	ENSG00000104325.2:ENST00000220764.2:chr8:91013743:+	1,4	+
chr8	109226868	109226869	ENSG00000104408.5:ENST00000220849.5:chr8:109226868:-	1,67	-
chr8	109215648	109215649	ENSG00000104408.5:ENST00000220849.5:chr8:109215648:-	1,67	-
chr10	81107423	81107424	ENSG00000108179.9:ENST00000225174.3:chr10:81107423:+	1,52	+
chr19	7619108	7619109	ENSG00000032444.11:ENST00000221249.6:chr19:7619108:+	1,1	+
chr19	10502250	10502251	ENSG00000105401.2:ENST00000222005.2:chr19:10502250:-	1,14	-
chr19	12991693	12991694	ENSG00000105612.4:ENST00000222219.3:chr19:12991693:-	1,20	-
chr19	36361809	36361810	ENSG00000105290.7:ENST00000221891.4:chr19:36361809:+	1,13	+
chr19	41838065	41838066	ENSG00000105329.5:ENST00000221930.5:chr19:41838065:-	1,2	-
chr2	111430360	111430361	ENSG00000169679.10:ENST00000302759.6:chr2:111430360:-	1,36	-
chr2	111415989	111415990	ENSG00000169679.10:ENST00000302759.6:chr2:111415989:-	1,36	-
chr4	1843180	1843181	ENSG00000168924.10:ENST00000302787.2:chr4:1843180:-	1,30	-
chr4	1834515	1834516	ENSG00000168924.10:ENST00000302787.2:chr4:1834515:-	1,32	-
chr4	184366732	184366733	ENSG00000168564.5:ENST00000302350.4:chr4:184366732:+	1,4	+
chr5	138253449	138253450	ENSG00000044115.16:ENST00000302763.7:chr5:138253449:+	1,80	+
chr8	27668550	27668551	ENSG00000168078.5:ENST00000301905.4:chr8:27668550:-	1,23	-
chr10	33212530	33212531	ENSG00000150093.14:ENST00000302278.3:chr10:33212530:-	1,30	-
chr10	33208941	33208942	ENSG00000150093.14:ENST00000302278.3:chr10:33208941:-	1,30	-
chr11	61091608	61091609	ENSG00000167986.9:ENST00000301764.7:chr11:61091608:-	1387	-
chr11	61090490	61090491	ENSG00000167986.9:ENST00000301764.7:chr11:61090490:-	1393	-
chr11	61084002	61084003	ENSG00000167986.9:ENST00000301764.7:chr11:61084002:-	1403	-
chr11	61081805	61081806	ENSG00000167986.9:ENST00000301764.7:chr11:61081805:-	2408	-
chr11	61081655	61081656	ENSG00000167986.9:ENST00000301764.7:chr11:61081655:-	1409	-
chr11	61081363	61081364	ENSG00000167986.9:ENST00000301764.7:chr11:61081363:-	1417	-
chr11	61081379	61081380	ENSG00000167986.9:ENST00000301764.7:chr11:61081379:-	1416	-
chr11	61081420	61081421	ENSG00000167986.9:ENST00000301764.7:chr11:61081420:-	1417	-
chr11	61081109	61081110	ENSG00000167986.9:ENST00000301764.7:chr11:61081109:-	1419	-
chr11	61079279	61079280	ENSG00000167986.9:ENST00000301764.7:chr11:61079279:-	1427	-
chr11	61079333	61079334	ENSG00000167986.9:ENST00000301764.7:chr11:61079333:-	1427	-
chr11	61077773	61077774	ENSG00000167986.9:ENST00000301764.7:chr11:61077773:-	2428	-
chr11	61077379	61077380	ENSG00000167986.9:ENST00000301764.7:chr11:61077379:-	1430	-
chr11	61071371	61071372	ENSG00000167986.9:ENST00000301764.7:chr11:61071371:-	1432	-
chr11	61070094	61070095	ENSG00000167986.9:ENST00000301764.7:chr11:61070094:-	1433	-
chr11	61070167	61070168	ENSG00000167986.9:ENST00000301764.7:chr11:61070167:-	1433	-
chr11	61069730	61069731	ENSG00000167986.9:ENST00000301764.7:chr11:61069730:-	1433	-
chr11	61069760	61069761	ENSG00000167986.9:ENST00000301764.7:chr11:61069760:-	1433	-
chr11	61068369	61068370	ENSG00000167986.9:ENST00000301764.7:chr11:61068369:-	1433	-
chr11	61067624	61067625	ENSG00000167986.9:ENST00000301764.7:chr11:61067624:-	1433	-
chr11	62445816	62445817	ENSG00000162191.9:ENST00000301935.5:chr11:62445816:-	1,5	-
chr11	62444339	62444340	ENSG00000162191.9:ENST00000301935.5:chr11:62444339:-	1,5	-
chr16	2282276	2282277	ENSG00000167967.11:ENST00000301727.4:chr16:2282276:+	1,14	+
chr16	2283524	2283525	ENSG00000167967.11:ENST00000301727.4:chr16:2283524:+	1,14	+
chr16	70380898	70380899	ENSG00000168872.11:ENST00000302243.7:chr16:70380898:+	1,65	+
chr16	70380901	70380902	ENSG00000168872.11:ENST00000302243.7:chr16:70380901:+	1,65	+
chr16	88870429	88870430	ENSG00000167513.4:ENST00000301019.4:chr16:88870429:+	1,31	+
chr16	88870449	88870450	ENSG00000167513.4:ENST00000301019.4:chr16:88870449:+	1,31	+
chr17	2239389	2239390	ENSG00000167721.6:ENST00000301364.5:chr17:2239389:-	1,86	-
chr17	2238106	2238107	ENSG00000167721.6:ENST00000301364.5:chr17:2238106:-	1,90	-
chr17	16285470	16285471	ENSG00000170315.9:ENST00000302182.3:chr17:16285470:+	1187	+
chr17	16285614	16285615	ENSG00000170315.9:ENST00000302182.3:chr17:16285614:+	1187	+
chr17	16285781	16285782	ENSG00000170315.9:ENST00000302182.3:chr17:16285781:+	1187	+
chr17	16285787	16285788	ENSG00000170315.9:ENST00000302182.3:chr17:16285787:+	1187	+
chr17	16285846	16285847	ENSG00000170315.9:ENST00000302182.3:chr17:16285846:+	1187	+
chr17	76181176	76181177	ENSG00000167900.7:ENST00000301634.7:chr17:76181176:-	1,28	-
chr5	79929754	79929755	ENSG00000228716.2:ENST00000439211.2:chr5:79929754:-	1165	-
chr12	46582836	46582837	ENSG00000111371.11:ENST00000439706.1:chr12:46582836:-	1,7	-
chr13	79945190	79945191	ENSG00000139746.11:ENST00000438724.1:chr13:79945190:-	1,1	-
chr17	60003815	60003816	ENSG00000108506.7:ENST00000444766.3:chr17:60003815:-	1,3	-
chr3	136191258	136191259	ENSG00000118007.8:ENST00000383202.2:chr3:136191258:-	1,11	-
chr3	136062829	136062830	ENSG00000118007.8:ENST00000383202.2:chr3:136062829:-	1,11	-
chr4	1206085	1206086	ENSG00000159692.11:ENST00000382952.3:chr4:1206085:-	1,18	-
chr7	30634541	30634542	ENSG00000106105.9:ENST00000389266.3:chr7:30634541:+	1448	+
chr7	30634641	30634642	ENSG00000106105.9:ENST00000389266.3:chr7:30634641:+	1459	+
chr7	30649228	30649229	ENSG00000106105.9:ENST00000389266.3:chr7:30649228:+	1472	+
chr7	30649260	30649261	ENSG00000106105.9:ENST00000389266.3:chr7:30649260:+	1467	+
chr7	30649267	30649268	ENSG00000106105.9:ENST00000389266.3:chr7:30649267:+	1472	+
chr7	30649294	30649295	ENSG00000106105.9:ENST00000389266.3:chr7:30649294:+	1472	+
chr7	30655562	30655563	ENSG00000106105.9:ENST00000389266.3:chr7:30655562:+	1473	+
chr7	30656767	30656768	ENSG00000106105.9:ENST00000389266.3:chr7:30656767:+	1471	+
chr7	30661072	30661073	ENSG00000106105.9:ENST00000389266.3:chr7:30661072:+	1486	+
chr7	30665857	30665858	ENSG00000106105.9:ENST00000389266.3:chr7:30665857:+	1487	+
chr7	30673462	30673463	ENSG00000106105.9:ENST00000389266.3:chr7:30673462:+	1485	+
chr8	23225695	23225696	ENSG00000134013.11:ENST00000389131.3:chr8:23225695:-	1,8	-
chr20	278560	278561	ENSG00000177764.6:ENST00000382352.3:chr20:278560:+	1,4	+
chr3	53262132	53262133	ENSG00000163931.11:ENST00000462138.1:chr3:53262132:-	1,45	-
chr3	53259781	53259782	ENSG00000163931.11:ENST00000462138.1:chr3:53259781:-	1,44	-
chr3	133525537	133525538	ENSG00000144867.7:ENST00000466490.2:chr3:133525537:+	1,84	+
chr7	102234156	102234157	ENSG00000105808.13:ENST00000461209.1:chr7:102234156:-	1,1	-
chr17	26708698	26708699	ENSG00000004139.9:ENST00000457710.3:chr17:26708698:+	1,4	+
chr2	85280308	85280309	ENSG00000176407.13:ENST00000409785.4:chr2:85280308:+	1,6	+
chr2	153527799	153527800	ENSG00000196504.11:ENST00000410080.1:chr2:153527799:-	1,15	-
chr2	201685952	201685953	ENSG00000082153.13:ENST00000409600.1:chr2:201685952:+	1,84	+
chr2	234756049	234756050	ENSG00000123485.7:ENST00000411486.2:chr2:234756049:-	1,23	-
chr7	150765014	150765015	ENSG00000164889.8:ENST00000413384.2:chr7:150765014:+	1,22	+
chr9	134073763	134073764	ENSG00000126883.12:ENST00000411637.2:chr9:134073763:+	1,1	+
chr1	28856424	28856425	ENSG00000180198.11:ENST00000373832.1:chr1:28856424:+	2,76	+
chr1	28862487	28862488	ENSG00000180198.11:ENST00000373832.1:chr1:28862487:+	1,74	+
chr1	33117551	33117552	ENSG00000162521.14:ENST00000373493.5:chr1:33117551:+	2230	+
chr1	33134360	33134361	ENSG00000162521.14:ENST00000373493.5:chr1:33134360:+	1240	+
chr1	33135143	33135144	ENSG00000162521.14:ENST00000373493.5:chr1:33135143:+	1244	+
chr1	36026167	36026168	ENSG00000020129.11:ENST00000373243.2:chr1:36026167:+	1,14	+
chr6	31129293	31129294	ENSG00000137310.7:ENST00000376255.4:chr6:31129293:+	1,22	+
chr6	36953941	36953942	ENSG00000137409.14:ENST00000373616.5:chr6:36953941:-	1,10	-
chr9	86586955	86586956	ENSG00000165119.14:ENST00000376263.3:chr9:86586955:-	1228	-
chr9	127996186	127996187	ENSG00000136933.12:ENST00000373538.3:chr9:127996186:+	1,2	+
chr10	51580590	51580591	ENSG00000138293.15:ENST00000374087.4:chr10:51580590:+	1,51	+
chr10	51581314	51581315	ENSG00000138293.15:ENST00000374087.4:chr10:51581314:+	1,51	+
chr10	51582887	51582888	ENSG00000138293.15:ENST00000374087.4:chr10:51582887:+	1,51	+
chr10	58119872	58119873	ENSG00000122952.12:ENST00000373944.3:chr10:58119872:-	1,56	-
chr20	25201954	25201955	ENSG00000197586.8:ENST00000376652.4:chr20:25201954:+	1,4	+
chr20	25203517	25203518	ENSG00000197586.8:ENST00000376652.4:chr20:25203517:+	1,4	+
chrX	54836161	54836162	ENSG00000102316.12:ENST00000375068.1:chrX:54836161:+	1154	+
chrX	54836324	54836325	ENSG00000102316.12:ENST00000375068.1:chrX:54836324:+	2154	+
chrX	54836325	54836326	ENSG00000102316.12:ENST00000375068.1:chrX:54836325:+	2154	+
chrX	54837743	54837744	ENSG00000102316.12:ENST00000375068.1:chrX:54837743:+	1154	+
chrX	54839589	54839590	ENSG00000102316.12:ENST00000375068.1:chrX:54839589:+	1154	+
chrX	54842047	54842048	ENSG00000102316.12:ENST00000375068.1:chrX:54842047:+	1154	+
chrX	77369393	77369394	ENSG00000102144.9:ENST00000373316.4:chrX:77369393:+	1340	+
chrX	77369583	77369584	ENSG00000102144.9:ENST00000373316.4:chrX:77369583:+	1340	+
chrX	77373659	77373660	ENSG00000102144.9:ENST00000373316.4:chrX:77373659:+	1342	+
chrX	77380372	77380373	ENSG00000102144.9:ENST00000373316.4:chrX:77380372:+	1343	+
chrX	77380481	77380482	ENSG00000102144.9:ENST00000373316.4:chrX:77380481:+	1343	+
chrX	77380838	77380839	ENSG00000102144.9:ENST00000373316.4:chrX:77380838:+	1344	+
chr1	11073984	11073985	ENSG00000120948.11:ENST00000240185.3:chr1:11073984:+	1,50	+
chr1	160293290	160293291	ENSG00000122218.10:ENST00000241704.7:chr1:160293290:-	1285	-
chr1	160282884	160282885	ENSG00000122218.10:ENST00000241704.7:chr1:160282884:-	1291	-
chr1	160278904	160278905	ENSG00000122218.10:ENST00000241704.7:chr1:160278904:-	1296	-
chr1	160276217	160276218	ENSG00000122218.10:ENST00000241704.7:chr1:160276217:-	1300	-
chr1	160269007	160269008	ENSG00000122218.10:ENST00000241704.7:chr1:160269007:-	1302	-
chr1	160267390	160267391	ENSG00000122218.10:ENST00000241704.7:chr1:160267390:-	1302	-
chr1	160262974	160262975	ENSG00000122218.10:ENST00000241704.7:chr1:160262974:-	1301	-
chr1	160262344	160262345	ENSG00000122218.10:ENST00000241704.7:chr1:160262344:-	1301	-
chr1	160261175	160261176	ENSG00000122218.10:ENST00000241704.7:chr1:160261175:-	2301	-
chr2	71361829	71361830	ENSG00000124383.4:ENST00000244230.2:chr2:71361829:+	1,21	+
chr3	127778978	127778979	ENSG00000058262.5:ENST00000243253.3:chr3:127778978:+	1137	+
chr3	127786308	127786309	ENSG00000058262.5:ENST00000243253.3:chr3:127786308:+	1137	+
chr3	197508758	197508759	ENSG00000122068.8:ENST00000241502.4:chr3:197508758:+	1,16	+
chr6	7310246	7310247	ENSG00000124783.8:ENST00000244763.4:chr6:7310246:-	1109	-
chr6	7303826	7303827	ENSG00000124783.8:ENST00000244763.4:chr6:7303826:-	1110	-
chr6	7295717	7295718	ENSG00000124783.8:ENST00000244763.4:chr6:7295717:-	1112	-
chr6	36651940	36651941	ENSG00000124762.9:ENST00000244741.5:chr6:36651940:+	1,39	+
chr7	29983793	29983794	ENSG00000136193.12:ENST00000242059.5:chr7:29983793:-	1,71	-
chr7	36324325	36324326	ENSG00000122547.6:ENST00000242108.4:chr7:36324325:+	1,1	+
chr8	22426780	22426781	ENSG00000120896.9:ENST00000240123.7:chr8:22426780:+	1,1	+
chr8	110334647	110334648	ENSG00000120526.6:ENST00000239690.4:chr8:110334647:-	1,11	-
chr10	102676392	102676393	ENSG00000119906.7:ENST00000238961.4:chr10:102676392:+	1,2	+
chr11	34485687	34485688	ENSG00000121691.4:ENST00000241052.4:chr11:34485687:+	1,12	+
chr12	110584850	110584851	ENSG00000122970.11:ENST00000242591.5:chr12:110584850:+	1,4	+
chr12	121175222	121175223	ENSG00000122971.4:ENST00000242592.4:chr12:121175222:+	1,7	+
chr16	58768076	58768077	ENSG00000125166.8:ENST00000245206.5:chr16:58768076:-	1161	-
chr17	73238469	73238470	ENSG00000125447.12:ENST00000245541.6:chr17:73238469:-	1,9	-
chr19	12845172	12845173	ENSG00000123144.6:ENST00000242784.4:chr19:12845172:-	1,7	-
chr19	34003621	34003622	ENSG00000124299.9:ENST00000244137.7:chr19:34003621:-	1,26	-
chr1	28099830	28099831	ENSG00000117758.9:ENST00000373943.4:chr1:28099830:+	1,86	+
chr1	28148774	28148775	ENSG00000117758.9:ENST00000373943.4:chr1:28148774:+	1,88	+
chr1	28233737	28233738	ENSG00000117748.5:ENST00000373912.3:chr1:28233737:-	1,94	-
chr1	29069555	29069556	ENSG00000198492.10:ENST00000373812.3:chr1:29069555:+	1230	+
chr1	29069649	29069650	ENSG00000198492.10:ENST00000373812.3:chr1:29069649:+	1230	+
chr1	29069713	29069714	ENSG00000198492.10:ENST00000373812.3:chr1:29069713:+	1230	+
chr1	29069926	29069927	ENSG00000198492.10:ENST00000373812.3:chr1:29069926:+	2230	+
chr1	29070085	29070086	ENSG00000198492.10:ENST00000373812.3:chr1:29070085:+	1230	+
chr1	31897697	31897698	ENSG00000168528.7:ENST00000373709.3:chr1:31897697:+	1,2	+
chr1	32694337	32694338	ENSG00000084623.7:ENST00000373586.1:chr1:32694337:+	1,64	+
chr1	32797134	32797135	ENSG00000116478.7:ENST00000373548.3:chr1:32797134:+	1119	+
chr1	32797707	32797708	ENSG00000116478.7:ENST00000373548.3:chr1:32797707:+	1119	+
chr1	33252552	33252553	ENSG00000134684.6:ENST00000373477.4:chr1:33252552:-	1479	-
chr1	33252564	33252565	ENSG00000134684.6:ENST00000373477.4:chr1:33252564:-	1479	-
chr1	33251974	33251975	ENSG00000134684.6:ENST00000373477.4:chr1:33251974:-	1480	-
chr1	33248054	33248055	ENSG00000134684.6:ENST00000373477.4:chr1:33248054:-	1478	-
chr1	33245734	33245735	ENSG00000134684.6:ENST00000373477.4:chr1:33245734:-	1479	-
chr1	33245743	33245744	ENSG00000134684.6:ENST00000373477.4:chr1:33245743:-	1480	-
chr1	33245045	33245046	ENSG00000134684.6:ENST00000373477.4:chr1:33245045:-	1480	-
chr1	33241665	33241666	ENSG00000134684.6:ENST00000373477.4:chr1:33241665:-	1480	-
chr1	33478854	33478855	ENSG00000004455.12:ENST00000373449.2:chr1:33478854:-	1157	-
chr6	36437957	36437958	ENSG00000112078.9:ENST00000373731.2:chr6:36437957:+	1,56	+
chr6	36564679	36564680	ENSG00000112081.12:ENST00000373715.6:chr6:36564679:+	1,86	+
chr6	36937838	36937839	ENSG00000137409.14:ENST00000373627.5:chr6:36937838:-	1,62	-
chr6	38652187	38652188	ENSG00000124767.6:ENST00000373365.4:chr6:38652187:-	1299	-
chr6	38652283	38652284	ENSG00000124767.6:ENST00000373365.4:chr6:38652283:-	1298	-
chr6	38650584	38650585	ENSG00000124767.6:ENST00000373365.4:chr6:38650584:-	1299	-
chr6	38650613	38650614	ENSG00000124767.6:ENST00000373365.4:chr6:38650613:-	1298	-
chr20	34242628	34242629	ENSG00000244462.3:ENST00000374114.3:chr20:34242628:-	1,31	-
chr20	35690634	35690635	ENSG00000080839.7:ENST00000373664.3:chr20:35690634:-	1,7	-
chr20	35632172	35632173	ENSG00000080839.7:ENST00000373664.3:chr20:35632172:-	1,7	-
chr1	113460126	113460127	ENSG00000155380.7:ENST00000369626.3:chr1:113460126:-	1303	-
chr1	113460387	113460388	ENSG00000155380.7:ENST00000369626.3:chr1:113460387:-	1301	-
chr1	113456704	113456705	ENSG00000155380.7:ENST00000369626.3:chr1:113456704:-	1303	-
chr1	117617631	117617632	ENSG00000116830.7:ENST00000369466.4:chr1:117617631:+	1,27	+
chr1	119576731	119576732	ENSG00000116874.7:ENST00000369426.5:chr1:119576731:-	1,3	-
chr1	120266056	120266057	ENSG00000092621.7:ENST00000369409.4:chr1:120266056:+	1201	+
chr1	120269519	120269520	ENSG00000092621.7:ENST00000369409.4:chr1:120269519:+	1201	+
chr1	120279801	120279802	ENSG00000092621.7:ENST00000369409.4:chr1:120279801:+	1201	+
chr1	120284455	120284456	ENSG00000092621.7:ENST00000369409.4:chr1:120284455:+	1201	+
chr1	120285578	120285579	ENSG00000092621.7:ENST00000369409.4:chr1:120285578:+	1201	+
chr1	148256735	148256736	ENSG00000203832.6:ENST00000369202.1:chr1:148256735:-	1,2	-
chr1	150551345	150551346	ENSG00000143384.8:ENST00000369026.2:chr1:150551345:-	1,50	-
chr1	150551811	150551812	ENSG00000143384.8:ENST00000369026.2:chr1:150551811:-	1,44	-
chr6	83728817	83728818	ENSG00000118420.12:ENST00000369747.3:chr6:83728817:-	1,3	-
chr6	87966030	87966031	ENSG00000188994.8:ENST00000369577.3:chr6:87966030:+	1,3	+
chr6	90405709	90405710	ENSG00000112159.7:ENST00000369393.3:chr6:90405709:-	1,6	-
chr6	93973629	93973630	ENSG00000135333.9:ENST00000369303.4:chr6:93973629:-	3,4	-
chr6	108230168	108230169	ENSG00000025796.9:ENST00000369002.4:chr6:108230168:-	1,58	-
chr6	108218886	108218887	ENSG00000025796.9:ENST00000369002.4:chr6:108218886:-	1,56	-
chr10	112266822	112266823	ENSG00000138166.5:ENST00000369583.3:chr10:112266822:+	1,1	+
chr10	115636522	115636523	ENSG00000196865.4:ENST00000369301.3:chr10:115636522:+	1,10	+
chr10	120825065	120825066	ENSG00000107581.8:ENST00000369144.3:chr10:120825065:-	1136	-
chr10	120818736	120818737	ENSG00000107581.8:ENST00000369144.3:chr10:120818736:-	1136	-
chr10	123730498	123730499	ENSG00000107672.10:ENST00000369023.3:chr10:123730498:-	1,15	-
chrX	153695444	153695445	ENSG00000130827.5:ENST00000369682.3:chrX:153695444:+	1,1	+
chrX	153993793	153993794	ENSG00000130826.11:ENST00000369550.5:chrX:153993793:+	1114	+
chr15	75185105	75185106	ENSG00000178802.13:ENST00000566377.1:chr15:75185105:+	1,12	+
chr16	2024659	2024660	ENSG00000183751.10:ENST00000568546.1:chr16:2024659:+	1,20	+
chr16	2025685	2025686	ENSG00000183751.10:ENST00000568546.1:chr16:2025685:+	1,20	+
chr16	19533248	19533249	ENSG00000006007.7:ENST00000564172.1:chr16:19533248:-	1,4	-
chr16	84695563	84695564	ENSG00000135686.8:ENST00000564996.1:chr16:84695563:+	1,1	+
chr17	1563193	1563194	ENSG00000174231.12:ENST00000572621.1:chr17:1563193:-	1,2	-
chr17	4575269	4575270	ENSG00000141456.10:ENST00000572293.1:chr17:4575269:-	1,4	-
chr17	44248847	44248848	ENSG00000120071.8:ENST00000574590.1:chr17:44248847:-	2,3	-
chr1	16456878	16456879	ENSG00000142627.9:ENST00000358432.5:chr1:16456878:-	1,15	-
chr1	220345300	220345301	ENSG00000118873.11:ENST00000358951.2:chr1:220345300:-	1,26	-
chr1	220330631	220330632	ENSG00000118873.11:ENST00000358951.2:chr1:220330631:-	1,26	-
chr5	177634101	177634102	ENSG00000197451.6:ENST00000358344.3:chr5:177634101:+	1,39	+
chr7	150737664	150737665	ENSG00000197150.8:ENST00000358849.4:chr7:150737664:+	1,9	+
chr10	43089103	43089104	ENSG00000196693.10:ENST00000359467.3:chr10:43089103:-	1,3	-
chr10	43089188	43089189	ENSG00000196693.10:ENST00000359467.3:chr10:43089188:-	1,3	-
chr10	43089211	43089212	ENSG00000196693.10:ENST00000359467.3:chr10:43089211:-	1,3	-
chr10	43089236	43089237	ENSG00000196693.10:ENST00000359467.3:chr10:43089236:-	1,3	-
chr10	43089260	43089261	ENSG00000196693.10:ENST00000359467.3:chr10:43089260:-	1,3	-
chr10	43089264	43089265	ENSG00000196693.10:ENST00000359467.3:chr10:43089264:-	1,3	-
chr10	43089342	43089343	ENSG00000196693.10:ENST00000359467.3:chr10:43089342:-	1,3	-
chr10	43089365	43089366	ENSG00000196693.10:ENST00000359467.3:chr10:43089365:-	1,3	-
chr10	71129039	71129040	ENSG00000156515.17:ENST00000359426.6:chr10:71129039:+	1,49	+
chr10	71139640	71139641	ENSG00000156515.17:ENST00000359426.6:chr10:71139640:+	1,49	+
chr11	57563164	57563165	ENSG00000198561.8:ENST00000358694.6:chr11:57563164:+	1,8	+
chr14	20779789	20779790	ENSG00000100814.13:ENST00000358932.4:chr14:20779789:-	1,6	-
chr14	100808748	100808749	ENSG00000140105.13:ENST00000358655.4:chr14:100808748:-	1,24	-
chr14	100803456	100803457	ENSG00000140105.13:ENST00000358655.4:chr14:100803456:-	1,24	-
chr17	29546054	29546055	ENSG00000196712.12:ENST00000358273.4:chr17:29546054:+	1,12	+
chr17	29562953	29562954	ENSG00000196712.12:ENST00000358273.4:chr17:29562953:+	1,13	+
chr17	65074380	65074381	ENSG00000198265.7:ENST00000358691.5:chr17:65074380:-	1,7	-
chr3	52295479	52295480	ENSG00000164091.7:ENST00000296490.3:chr3:52295479:-	1,59	-
chr3	128369428	128369429	ENSG00000163902.7:ENST00000296255.3:chr3:128369428:-	1203	-
chr3	128369435	128369436	ENSG00000163902.7:ENST00000296255.3:chr3:128369435:-	1203	-
chr3	128356856	128356857	ENSG00000163902.7:ENST00000296255.3:chr3:128356856:-	1205	-
chr3	128356913	128356914	ENSG00000163902.7:ENST00000296255.3:chr3:128356913:-	1205	-
chr3	128356921	128356922	ENSG00000163902.7:ENST00000296255.3:chr3:128356921:-	1204	-
chr3	128344399	128344400	ENSG00000163902.7:ENST00000296255.3:chr3:128344399:-	1208	-
chr3	128341072	128341073	ENSG00000163902.7:ENST00000296255.3:chr3:128341072:-	1208	-
chr3	148744606	148744607	ENSG00000163754.13:ENST00000296048.6:chr3:148744606:+	1,29	+
chr3	148847606	148847607	ENSG00000163755.4:ENST00000296051.2:chr3:148847606:+	1,7	+
chr3	148880110	148880111	ENSG00000163755.4:ENST00000296051.2:chr3:148880110:+	1,8	+
chr4	77676061	77676062	ENSG00000138771.10:ENST00000296043.6:chr4:77676061:+	1,1	+
chr4	99916939	99916940	ENSG00000164024.7:ENST00000296411.6:chr4:99916939:+	1,36	+
chr4	100003217	100003218	ENSG00000197894.6:ENST00000296412.8:chr4:100003217:-	1,28	-
chr4	128723050	128723051	ENSG00000164070.7:ENST00000296464.4:chr4:128723050:+	1,22	+
chr4	146026812	146026813	ENSG00000164163.6:ENST00000296577.4:chr4:146026812:+	1,54	+
chr5	71490623	71490624	ENSG00000131711.10:ENST00000296755.7:chr5:71490623:+	1,55	+
chr5	71495470	71495471	ENSG00000131711.10:ENST00000296755.7:chr5:71495470:+	1,7	+
chr5	76734066	76734067	ENSG00000164253.8:ENST00000296679.4:chr5:76734066:-	1,46	-
chr5	132098235	132098236	ENSG00000164402.9:ENST00000296873.7:chr5:132098235:-	1,33	-
chr5	137902713	137902714	ENSG00000113013.8:ENST00000297185.3:chr5:137902713:-	1226	-
chr5	137902768	137902769	ENSG00000113013.8:ENST00000297185.3:chr5:137902768:-	1225	-
chr5	137897297	137897298	ENSG00000113013.8:ENST00000297185.3:chr5:137897297:-	1227	-
chr5	137895743	137895744	ENSG00000113013.8:ENST00000297185.3:chr5:137895743:-	1227	-
chr5	137893177	137893178	ENSG00000113013.8:ENST00000297185.3:chr5:137893177:-	1228	-
chr5	137892184	137892185	ENSG00000113013.8:ENST00000297185.3:chr5:137892184:-	1210	-
chr5	158699068	158699069	ENSG00000164332.6:ENST00000296786.6:chr5:158699068:+	1,6	+
chr7	781059	781060	ENSG00000164818.11:ENST00000297440.6:chr7:781059:+	1,42	+
chr8	117868965	117868966	ENSG00000164754.8:ENST00000297338.2:chr8:117868965:-	1120	-
chr3	167414823	167414824	ENSG00000114209.10:ENST00000497056.2:chr3:167414823:-	1,3	-
chr3	167414826	167414827	ENSG00000114209.10:ENST00000497056.2:chr3:167414826:-	1,3	-
chr3	167414827	167414828	ENSG00000114209.10:ENST00000497056.2:chr3:167414827:-	1,3	-
chr4	3521868	3521869	ENSG00000163956.6:ENST00000500728.2:chr4:3521868:-	1,32	-
chr4	20550147	20550148	ENSG00000145147.15:ENST00000504154.1:chr4:20550147:+	1,5	+
chr4	125593521	125593522	ENSG00000151458.7:ENST00000504087.1:chr4:125593521:-	1,8	-
chr7	44097763	44097764	ENSG00000136279.14:ENST00000494774.1:chr7:44097763:+	3,24	+
chr12	104721305	104721306	ENSG00000198431.11:ENST00000503506.2:chr12:104721305:+	1,22	+
chr16	27476595	27476596	ENSG00000077235.13:ENST00000561623.1:chr16:27476595:-	1,10	-
chr16	56510092	56510093	ENSG00000087263.12:ENST00000566157.1:chr16:56510092:+	1102	+
chr16	58621739	58621740	ENSG00000125107.12:ENST00000569240.1:chr16:58621739:-	1,6	-
chr17	44248847	44248848	ENSG00000120071.8:ENST00000572904.1:chr17:44248847:-	1,1	-
chr1	31819499	31819500	ENSG00000121766.10:ENST00000344147.5:chr1:31819499:+	1,12	+
chr1	31819540	31819541	ENSG00000121766.10:ENST00000344147.5:chr1:31819540:+	1,12	+
chr1	46752066	46752067	ENSG00000132128.12:ENST00000343304.6:chr1:46752066:-	1,53	-
chr1	46752135	46752136	ENSG00000132128.12:ENST00000343304.6:chr1:46752135:-	1,53	-
chr1	226110004	226110005	ENSG00000143811.12:ENST00000343818.6:chr1:226110004:-	1,77	-
chr1	226108949	226108950	ENSG00000143811.12:ENST00000343818.6:chr1:226108949:-	1,77	-
chr3	122170429	122170430	ENSG00000114030.8:ENST00000344337.6:chr3:122170429:-	1,41	-
chr3	122146404	122146405	ENSG00000114030.8:ENST00000344337.6:chr3:122146404:-	1,41	-
chr4	57340510	57340511	ENSG00000174780.11:ENST00000342756.5:chr4:57340510:+	1,80	+
chr4	57344607	57344608	ENSG00000174780.11:ENST00000342756.5:chr4:57344607:+	1,80	+
chr5	115783131	115783132	ENSG00000092421.12:ENST00000343348.6:chr5:115783131:-	1,10	-
chr6	108985289	108985290	ENSG00000118689.10:ENST00000343882.6:chr6:108985289:+	1,15	+
chr7	65439421	65439422	ENSG00000169919.12:ENST00000345660.6:chr7:65439421:-	1,21	-
chr7	65429329	65429330	ENSG00000169919.12:ENST00000345660.6:chr7:65429329:-	1,21	-
chr10	16858972	16858973	ENSG00000148484.13:ENST00000345264.5:chr10:16858972:-	1,22	-
chr12	121154829	121154830	ENSG00000175970.7:ENST00000344651.4:chr12:121154829:+	1,69	+
chr14	102675376	102675377	ENSG00000140153.13:ENST00000342702.3:chr14:102675376:+	1,3	+
chr16	2012816	2012817	ENSG00000140988.11:ENST00000343262.4:chr16:2012816:-	1300	-
chr16	2012540	2012541	ENSG00000140988.11:ENST00000343262.4:chr16:2012540:-	1300	-
chr16	2012105	2012106	ENSG00000140988.11:ENST00000343262.4:chr16:2012105:-	1300	-
chr16	2012167	2012168	ENSG00000140988.11:ENST00000343262.4:chr16:2012167:-	1300	-
chr16	2012223	2012224	ENSG00000140988.11:ENST00000343262.4:chr16:2012223:-	1300	-
chr16	2012260	2012261	ENSG00000140988.11:ENST00000343262.4:chr16:2012260:-	1300	-
chr16	84115456	84115457	ENSG00000140943.12:ENST00000343411.3:chr16:84115456:-	1,48	-
chr16	84101393	84101394	ENSG00000140943.12:ENST00000343411.3:chr16:84101393:-	1,48	-
chr18	48584815	48584816	ENSG00000141646.9:ENST00000342988.3:chr18:48584815:+	2,2	+
chr21	46221630	46221631	ENSG00000184787.14:ENST00000345496.2:chr21:46221630:-	1,87	-
chr21	46207860	46207861	ENSG00000184787.14:ENST00000345496.2:chr21:46207860:-	1,87	-
chr21	46197255	46197256	ENSG00000184787.14:ENST00000345496.2:chr21:46197255:-	1,88	-
chr1	43396738	43396739	ENSG00000117394.15:ENST00000426263.3:chr1:43396738:-	2,21	-
chr1	43396458	43396459	ENSG00000117394.15:ENST00000426263.3:chr1:43396458:-	1,21	-
chr3	48511197	48511198	ENSG00000164054.11:ENST00000426002.1:chr3:48511197:-	1,51	-
chr11	18418505	18418506	ENSG00000134333.9:ENST00000422447.3:chr11:18418505:+	1220	+
chr14	55462433	55462434	ENSG00000198554.7:ENST00000421192.1:chr14:55462433:-	1,13	-
chr16	74511415	74511416	ENSG00000090863.7:ENST00000422840.2:chr16:74511415:-	1,40	-
chr17	38569509	38569510	ENSG00000131747.10:ENST00000423485.1:chr17:38569509:-	1376	-
chr17	38569145	38569146	ENSG00000131747.10:ENST00000423485.1:chr17:38569145:-	1380	-
chr17	38567938	38567939	ENSG00000131747.10:ENST00000423485.1:chr17:38567938:-	1382	-
chr17	38564306	38564307	ENSG00000131747.10:ENST00000423485.1:chr17:38564306:-	1384	-
chr17	38560737	38560738	ENSG00000131747.10:ENST00000423485.1:chr17:38560737:-	1392	-
chr17	38559233	38559234	ENSG00000131747.10:ENST00000423485.1:chr17:38559233:-	1394	-
chr17	38556833	38556834	ENSG00000131747.10:ENST00000423485.1:chr17:38556833:-	1397	-
chr17	38556575	38556576	ENSG00000131747.10:ENST00000423485.1:chr17:38556575:-	1397	-
chr17	38556240	38556241	ENSG00000131747.10:ENST00000423485.1:chr17:38556240:-	1394	-
chr17	38556256	38556257	ENSG00000131747.10:ENST00000423485.1:chr17:38556256:-	1394	-
chr17	38548950	38548951	ENSG00000131747.10:ENST00000423485.1:chr17:38548950:-	1,17	-
chrX	152242044	152242045	ENSG00000235961.3:ENST00000421798.3:chrX:152242044:+	1,4	+
chr1	154227660	154227661	ENSG00000143569.14:ENST00000343815.6:chr1:154227660:+	1,13	+
chr1	224001974	224001975	ENSG00000143514.12:ENST00000343537.7:chr1:224001974:-	1,18	-
chr1	223971825	223971826	ENSG00000143514.12:ENST00000343537.7:chr1:223971825:-	1,17	-
chr2	55792138	55792139	ENSG00000138041.11:ENST00000345102.5:chr2:55792138:-	1,6	-
chr5	156746854	156746855	ENSG00000055163.14:ENST00000347377.6:chr5:156746854:+	1,6	+
chr5	162869140	162869141	ENSG00000113328.14:ENST00000340828.2:chr5:162869140:+	1,36	+
chr5	162869145	162869146	ENSG00000113328.14:ENST00000340828.2:chr5:162869145:+	1,36	+
chr12	56604249	56604250	ENSG00000181852.13:ENST00000345093.4:chr12:56604249:-	1,19	-
chr19	2130442	2130443	ENSG00000065000.11:ENST00000345016.5:chr19:2130442:-	2,87	-
chr19	2123870	2123871	ENSG00000065000.11:ENST00000345016.5:chr19:2123870:-	1,87	-
chr19	2115539	2115540	ENSG00000065000.11:ENST00000345016.5:chr19:2115539:-	2,87	-
chr19	2115372	2115373	ENSG00000065000.11:ENST00000345016.5:chr19:2115372:-	1,87	-
chr20	43142605	43142606	ENSG00000132824.9:ENST00000342374.4:chr20:43142605:-	2,66	-
chr20	43141530	43141531	ENSG00000132824.9:ENST00000342374.4:chr20:43141530:-	1,68	-
chr20	43139972	43139973	ENSG00000132824.9:ENST00000342374.4:chr20:43139972:-	1,68	-
chr20	43135621	43135622	ENSG00000132824.9:ENST00000342374.4:chr20:43135621:-	1,68	-
chr20	43132599	43132600	ENSG00000132824.9:ENST00000342374.4:chr20:43132599:-	1,69	-
chr20	43129860	43129861	ENSG00000132824.9:ENST00000342374.4:chr20:43129860:-	1,70	-
chr20	43129876	43129877	ENSG00000132824.9:ENST00000342374.4:chr20:43129876:-	1,70	-
chr22	50898411	50898412	ENSG00000100241.16:ENST00000348911.6:chr22:50898411:-	1,1	-
chrX	118786999	118787000	ENSG00000125354.18:ENST00000343984.5:chrX:118786999:-	1,24	-
chrX	148564430	148564431	ENSG00000010404.13:ENST00000340855.6:chrX:148564430:-	1,16	-
chr1	36644334	36644335	ENSG00000116871.11:ENST00000373151.2:chr1:36644334:+	1,7	+
chr1	40533356	40533357	ENSG00000131236.12:ENST00000372797.3:chr1:40533356:+	1,66	+
chr1	154938194	154938195	ENSG00000160691.14:ENST00000368450.1:chr1:154938194:-	1,2	-
chr1	171756939	171756940	ENSG00000010165.15:ENST00000362019.3:chr1:171756939:+	1,9	+
chr3	49006012	49006013	ENSG00000177479.15:ENST00000356401.4:chr3:49006012:+	1,42	+
chr6	44200665	44200666	ENSG00000112759.12:ENST00000371755.3:chr6:44200665:+	1,22	+
chr9	131897086	131897087	ENSG00000119383.15:ENST00000357197.4:chr9:131897086:+	1,1	+
chr14	55423914	55423915	ENSG00000198554.7:ENST00000360586.3:chr14:55423914:-	2,8	-
chr17	7127511	7127512	ENSG00000072778.15:ENST00000356839.5:chr17:7127511:+	1,24	+
chr17	46135785	46135786	ENSG00000082641.11:ENST00000357480.5:chr17:46135785:+	1,23	+
chr19	2117254	2117255	ENSG00000065000.11:ENST00000355272.6:chr19:2117254:-	1,2	-
chr19	34859596	34859597	ENSG00000105220.10:ENST00000356487.5:chr19:34859596:+	1,68	+
chr19	34868754	34868755	ENSG00000105220.10:ENST00000356487.5:chr19:34868754:+	1,68	+
chr19	34890873	34890874	ENSG00000105220.10:ENST00000356487.5:chr19:34890873:+	1,68	+
chr20	47734565	47734566	ENSG00000124214.15:ENST00000371828.3:chr20:47734565:-	1,5	-
chr20	57244382	57244383	ENSG00000124222.17:ENST00000371141.4:chr20:57244382:+	1,14	+
chr1	114354712	114354713	ENSG00000081019.9:ENST00000261441.5:chr1:114354712:-	1,4	-
chr1	229637840	229637841	ENSG00000069248.9:ENST00000261396.3:chr1:229637840:-	1109	-
chr1	229623350	229623351	ENSG00000069248.9:ENST00000261396.3:chr1:229623350:-	1116	-
chr1	229606402	229606403	ENSG00000069248.9:ENST00000261396.3:chr1:229606402:-	1120	-
chr1	229599296	229599297	ENSG00000069248.9:ENST00000261396.3:chr1:229599296:-	1116	-
chr4	39699995	39699996	ENSG00000078140.9:ENST00000261427.5:chr4:39699995:+	1,27	+
chr5	71591359	71591360	ENSG00000113048.12:ENST00000261413.5:chr5:71591359:-	1,55	-
chr5	71533926	71533927	ENSG00000113048.12:ENST00000261413.5:chr5:71533926:-	1,55	-
chr5	71519627	71519628	ENSG00000113048.12:ENST00000261413.5:chr5:71519627:-	1,55	-
chr5	148892727	148892728	ENSG00000113712.12:ENST00000261798.5:chr5:148892727:-	1,42	-
chr12	4409100	4409101	ENSG00000118971.3:ENST00000261254.3:chr12:4409100:+	1,38	+
chr12	14578330	14578331	ENSG00000171681.8:ENST00000261168.4:chr12:14578330:+	1,8	+
chr12	14628858	14628859	ENSG00000171681.8:ENST00000261168.4:chr12:14628858:+	3,8	+
chr12	14948031	14948032	ENSG00000084463.3:ENST00000261167.2:chr12:14948031:-	1,85	-
chr12	14947584	14947585	ENSG00000084463.3:ENST00000261167.2:chr12:14947584:-	1,86	-
chr12	14946844	14946845	ENSG00000084463.3:ENST00000261167.2:chr12:14946844:-	1,86	-
chr12	25047328	25047329	ENSG00000060982.10:ENST00000261192.7:chr12:25047328:-	1,75	-
chr12	25047356	25047357	ENSG00000060982.10:ENST00000261192.7:chr12:25047356:-	1,75	-
chr12	25034299	25034300	ENSG00000060982.10:ENST00000261192.7:chr12:25034299:-	1,75	-
chr12	25002800	25002801	ENSG00000060982.10:ENST00000261192.7:chr12:25002800:-	1,75	-
chr12	101723078	101723079	ENSG00000120800.4:ENST00000261637.4:chr12:101723078:+	1,9	+
chr12	112204813	112204814	ENSG00000111275.8:ENST00000261733.2:chr12:112204813:+	1,38	+
chr13	50299580	50299581	ENSG00000102753.5:ENST00000261667.3:chr13:50299580:-	1,51	-
chr14	57072303	57072304	ENSG00000070269.9:ENST00000261556.6:chr14:57072303:+	1,6	+
chr15	28514488	28514489	ENSG00000128731.11:ENST00000261609.7:chr15:28514488:-	1,4	-
chr15	28356945	28356946	ENSG00000128731.11:ENST00000261609.7:chr15:28356945:-	1,4	-
chr15	52571849	52571850	ENSG00000128833.8:ENST00000261839.7:chr15:52571849:-	1,6	-
chr15	52556454	52556455	ENSG00000128833.8:ENST00000261839.7:chr15:52556454:-	1,6	-
chr15	60734660	60734661	ENSG00000128915.7:ENST00000261520.4:chr15:60734660:-	1,8	-
chr16	70310910	70310911	ENSG00000090861.11:ENST00000261772.8:chr16:70310910:-	1,80	-
chr16	70287269	70287270	ENSG00000090861.11:ENST00000261772.8:chr16:70287269:-	1,84	-
chr16	70286755	70286756	ENSG00000090861.11:ENST00000261772.8:chr16:70286755:-	1,84	-
chr16	87902746	87902747	ENSG00000103257.4:ENST00000261622.4:chr16:87902746:-	1,89	-
chr16	87902824	87902825	ENSG00000103257.4:ENST00000261622.4:chr16:87902824:-	1,88	-
chr16	87902987	87902988	ENSG00000103257.4:ENST00000261622.4:chr16:87902987:-	1,86	-
chr16	87885445	87885446	ENSG00000103257.4:ENST00000261622.4:chr16:87885445:-	1,89	-
chr16	87873310	87873311	ENSG00000103257.4:ENST00000261622.4:chr16:87873310:-	1,89	-
chr16	87870196	87870197	ENSG00000103257.4:ENST00000261622.4:chr16:87870196:-	1,89	-
chr17	20922444	20922445	ENSG00000124422.7:ENST00000261497.4:chr17:20922444:-	1,97	-
chr17	20916159	20916160	ENSG00000124422.7:ENST00000261497.4:chr17:20916159:-	2,97	-
chr18	2601444	2601445	ENSG00000080986.8:ENST00000261597.4:chr18:2601444:+	1,14	+
chr1	1550962	1550963	ENSG00000197530.8:ENST00000355826.5:chr1:1550962:+	1,2	+
chr1	115268946	115268947	ENSG00000009307.11:ENST00000358528.4:chr1:115268946:-	1101	-
chr1	115266567	115266568	ENSG00000009307.11:ENST00000358528.4:chr1:115266567:-	1100	-
chr2	100055247	100055248	ENSG00000135945.5:ENST00000258428.3:chr2:100055247:-	1,14	-
chr4	83763462	83763463	ENSG00000138674.12:ENST00000326950.5:chr4:83763462:-	1,10	-
chr10	70482288	70482289	ENSG00000060339.9:ENST00000265872.6:chr10:70482288:+	1,98	+
chr10	70507289	70507290	ENSG00000060339.9:ENST00000265872.6:chr10:70507289:+	1100	+
chr10	70516122	70516123	ENSG00000060339.9:ENST00000265872.6:chr10:70516122:+	1,99	+
chr10	70516140	70516141	ENSG00000060339.9:ENST00000265872.6:chr10:70516140:+	1,99	+
chr10	70516186	70516187	ENSG00000060339.9:ENST00000265872.6:chr10:70516186:+	1,99	+
chr17	74079740	74079741	ENSG00000182473.16:ENST00000332065.5:chr17:74079740:-	1,15	-
chr19	808589	808590	ENSG00000011304.12:ENST00000349038.4:chr19:808589:+	1,75	+
chr2	242202254	242202255	ENSG00000115677.12:ENST00000391976.2:chr2:242202254:-	1,38	-
chr2	242195695	242195696	ENSG00000115677.12:ENST00000391976.2:chr2:242195695:-	1,38	-
chr2	242169292	242169293	ENSG00000115677.12:ENST00000391976.2:chr2:242169292:-	1,34	-
chr3	9783748	9783749	ENSG00000156983.11:ENST00000383829.2:chr3:9783748:+	1,4	+
chr5	138643118	138643119	ENSG00000015479.13:ENST00000394805.3:chr5:138643118:+	1100	+
chr5	138643257	138643258	ENSG00000015479.13:ENST00000394805.3:chr5:138643257:+	1100	+
chr5	138643275	138643276	ENSG00000015479.13:ENST00000394805.3:chr5:138643275:+	1100	+
chr5	138643390	138643391	ENSG00000015479.13:ENST00000394805.3:chr5:138643390:+	1100	+
chr5	138655055	138655056	ENSG00000015479.13:ENST00000394805.3:chr5:138655055:+	1,99	+
chr5	138661295	138661296	ENSG00000015479.13:ENST00000394805.3:chr5:138661295:+	1,89	+
chr5	141357935	141357936	ENSG00000013561.13:ENST00000394520.2:chr5:141357935:+	1,25	+
chr5	141359913	141359914	ENSG00000013561.13:ENST00000394520.2:chr5:141359913:+	1,25	+
chr5	149743764	149743765	ENSG00000070814.13:ENST00000377797.3:chr5:149743764:+	1231	+
chr5	149748368	149748369	ENSG00000070814.13:ENST00000377797.3:chr5:149748368:+	1229	+
chr5	149751700	149751701	ENSG00000070814.13:ENST00000377797.3:chr5:149751700:+	1233	+
chr5	149754550	149754551	ENSG00000070814.13:ENST00000377797.3:chr5:149754550:+	2238	+
chr5	149754960	149754961	ENSG00000070814.13:ENST00000377797.3:chr5:149754960:+	1238	+
chr5	149755816	149755817	ENSG00000070814.13:ENST00000377797.3:chr5:149755816:+	1238	+
chr5	149758870	149758871	ENSG00000070814.13:ENST00000377797.3:chr5:149758870:+	1238	+
chr5	149759197	149759198	ENSG00000070814.13:ENST00000377797.3:chr5:149759197:+	1238	+
chr5	149773095	149773096	ENSG00000070814.13:ENST00000377797.3:chr5:149773095:+	1238	+
chr5	149775859	149775860	ENSG00000070814.13:ENST00000377797.3:chr5:149775859:+	1236	+
chr5	149776195	149776196	ENSG00000070814.13:ENST00000377797.3:chr5:149776195:+	1233	+
chr9	74971932	74971933	ENSG00000107372.8:ENST00000376962.5:chr9:74971932:-	1,28	-
chr10	28897231	28897232	ENSG00000095787.17:ENST00000375664.4:chr10:28897231:+	1,14	+
chr12	6967690	6967691	ENSG00000111667.9:ENST00000389231.5:chr12:6967690:+	1,36	+
chr12	58112931	58112932	ENSG00000135506.11:ENST00000389142.5:chr12:58112931:+	1,13	+
chr16	2258295	2258296	ENSG00000167965.13:ENST00000382450.4:chr16:2258295:+	1,1	+
chr16	89833572	89833573	ENSG00000187741.10:ENST00000389301.3:chr16:89833572:-	1,21	-
chr19	41778123	41778124	ENSG00000105323.12:ENST00000392006.3:chr19:41778123:+	1106	+
chr19	41798382	41798383	ENSG00000105323.12:ENST00000392006.3:chr19:41798382:+	1106	+
chr19	41810062	41810063	ENSG00000105323.12:ENST00000392006.3:chr19:41810062:+	1108	+
chr19	50376293	50376294	ENSG00000204673.6:ENST00000391835.1:chr19:50376293:-	1,3	-
chr21	34907001	34907002	ENSG00000159131.12:ENST00000381815.4:chr21:34907001:-	1111	-
chr21	34903146	34903147	ENSG00000159131.12:ENST00000381815.4:chr21:34903146:-	1110	-
chr21	34903158	34903159	ENSG00000159131.12:ENST00000381815.4:chr21:34903158:-	1111	-
chrX	39932611	39932612	ENSG00000183337.12:ENST00000378444.4:chrX:39932611:-	1,1	-
chrX	39932642	39932643	ENSG00000183337.12:ENST00000378444.4:chrX:39932642:-	1,1	-
chrX	51640087	51640088	ENSG00000179222.13:ENST00000375772.3:chrX:51640087:+	1,12	+
chr9	130216814	130216815	ENSG00000148356.9:ENST00000300417.6:chr9:130216814:+	1,3	+
chr11	35747682	35747683	ENSG00000166326.5:ENST00000299413.5:chr11:35747682:+	1,43	+
chr11	134014698	134014699	ENSG00000166086.8:ENST00000299106.4:chr11:134014698:+	1,10	+
chr12	69981772	69981773	ENSG00000166226.8:ENST00000299300.6:chr12:69981772:+	1195	+
chr12	69981962	69981963	ENSG00000166226.8:ENST00000299300.6:chr12:69981962:+	1195	+
chr12	69983305	69983306	ENSG00000166226.8:ENST00000299300.6:chr12:69983305:+	1195	+
chr12	69983423	69983424	ENSG00000166226.8:ENST00000299300.6:chr12:69983423:+	1196	+
chr12	69986766	69986767	ENSG00000166226.8:ENST00000299300.6:chr12:69986766:+	1196	+
chr12	69986880	69986881	ENSG00000166226.8:ENST00000299300.6:chr12:69986880:+	1193	+
chr12	69991448	69991449	ENSG00000166226.8:ENST00000299300.6:chr12:69991448:+	1193	+
chr12	69991800	69991801	ENSG00000166226.8:ENST00000299300.6:chr12:69991800:+	1193	+
chr12	104327865	104327866	ENSG00000166598.8:ENST00000299767.5:chr12:104327865:+	1427	+
chr12	104327884	104327885	ENSG00000166598.8:ENST00000299767.5:chr12:104327884:+	1427	+
chr12	104327930	104327931	ENSG00000166598.8:ENST00000299767.5:chr12:104327930:+	1429	+
chr12	104335429	104335430	ENSG00000166598.8:ENST00000299767.5:chr12:104335429:+	1416	+
chr12	104336440	104336441	ENSG00000166598.8:ENST00000299767.5:chr12:104336440:+	1419	+
chr12	104336944	104336945	ENSG00000166598.8:ENST00000299767.5:chr12:104336944:+	1412	+
chr12	104337552	104337553	ENSG00000166598.8:ENST00000299767.5:chr12:104337552:+	1411	+
chr14	92627996	92627997	ENSG00000165934.8:ENST00000298875.4:chr14:92627996:+	1,37	+
chr15	30672560	30672561	ENSG00000166664.9:ENST00000299847.2:chr15:30672560:-	3,3	-
chr15	44038740	44038741	ENSG00000167004.8:ENST00000300289.5:chr15:44038740:+	1,76	+
chr15	44053678	44053679	ENSG00000167004.8:ENST00000300289.5:chr15:44053678:+	1,76	+
chr15	79614440	79614441	ENSG00000166557.8:ENST00000299705.5:chr15:79614440:+	1,16	+
chr15	83820087	83820088	ENSG00000166503.4:ENST00000299633.4:chr15:83820087:-	1,5	-
chr15	83820094	83820095	ENSG00000166503.4:ENST00000299633.4:chr15:83820094:-	1,5	-
chr16	23691499	23691500	ENSG00000166851.10:ENST00000300093.4:chr16:23691499:+	1,66	+
chr16	23695285	23695286	ENSG00000166851.10:ENST00000300093.4:chr16:23695285:+	1,67	+
chr16	46717441	46717442	ENSG00000069329.11:ENST00000299138.7:chr16:46717441:-	1239	-
chr16	46708527	46708528	ENSG00000069329.11:ENST00000299138.7:chr16:46708527:-	1239	-
chr16	46706278	46706279	ENSG00000069329.11:ENST00000299138.7:chr16:46706278:-	1239	-
chr16	46705664	46705665	ENSG00000069329.11:ENST00000299138.7:chr16:46705664:-	1239	-
chr16	46694456	46694457	ENSG00000069329.11:ENST00000299138.7:chr16:46694456:-	1239	-
chr16	71798616	71798617	ENSG00000166747.8:ENST00000299980.4:chr16:71798616:-	1,12	-
chr16	75681941	75681942	ENSG00000166848.5:ENST00000300086.4:chr16:75681941:+	1,86	+
chr17	47486770	47486771	ENSG00000167085.7:ENST00000300408.3:chr17:47486770:-	1,29	-
chr1	9795201	9795202	ENSG00000171603.12:ENST00000377288.3:chr1:9795201:-	1,3	-
chr2	85554151	85554152	ENSG00000152291.9:ENST00000377386.3:chr2:85554151:-	1,13	-
chr4	57860825	57860826	ENSG00000047315.10:ENST00000381227.1:chr4:57860825:+	1,45	+
chr4	119678879	119678880	ENSG00000150961.10:ENST00000379735.5:chr4:119678879:-	1,1	-
chr8	26227670	26227671	ENSG00000221914.4:ENST00000380737.3:chr8:26227670:+	1,42	+
chr11	47858539	47858540	ENSG00000030066.9:ENST00000378460.2:chr11:47858539:-	1,50	-
chr11	47825005	47825006	ENSG00000030066.9:ENST00000378460.2:chr11:47825005:-	1,55	-
chr13	53030704	53030705	ENSG00000136108.10:ENST00000378037.5:chr13:53030704:+	1,34	+
chr13	67801406	67801407	ENSG00000184226.10:ENST00000377861.3:chr13:67801406:-	1,1	-
chr14	70490124	70490125	ENSG00000198732.6:ENST00000381280.4:chr14:70490124:+	1,10	+
chrX	47041412	47041413	ENSG00000182872.11:ENST00000377604.3:chrX:47041412:+	1,60	+
chrX	47065701	47065702	ENSG00000130985.12:ENST00000377351.4:chrX:47065701:+	1117	+
chr1	86144398	86144399	ENSG00000117174.6:ENST00000370574.3:chr1:86144398:-	1,27	-
chr1	93299132	93299133	ENSG00000122406.8:ENST00000370321.3:chr1:93299132:+	1236	+
chr1	93300386	93300387	ENSG00000122406.8:ENST00000370321.3:chr1:93300386:+	1237	+
chr1	93300435	93300436	ENSG00000122406.8:ENST00000370321.3:chr1:93300435:+	1237	+
chr1	93301751	93301752	ENSG00000122406.8:ENST00000370321.3:chr1:93301751:+	1237	+
chr1	93303078	93303079	ENSG00000122406.8:ENST00000370321.3:chr1:93303078:+	2239	+
chr1	95363327	95363328	ENSG00000117519.11:ENST00000370206.4:chr1:95363327:-	1123	-
chr1	109553899	109553900	ENSG00000085433.11:ENST00000369962.3:chr1:109553899:-	1,1	-
chr1	109824463	109824464	ENSG00000134222.12:ENST00000369907.3:chr1:109824463:-	1,4	-
chr1	110584458	110584459	ENSG00000143093.10:ENST00000369795.3:chr1:110584458:+	1,31	+
chr1	110596311	110596312	ENSG00000143093.10:ENST00000369795.3:chr1:110596311:+	1,31	+
chr6	70409005	70409006	ENSG00000168216.6:ENST00000370577.3:chr6:70409005:-	1,3	-
chr6	76554660	76554661	ENSG00000196586.9:ENST00000369981.3:chr6:76554660:+	1,5	+
chr10	102107264	102107265	ENSG00000099194.5:ENST00000370355.2:chr10:102107264:+	1,77	+
chr10	102112219	102112220	ENSG00000099194.5:ENST00000370355.2:chr10:102112219:+	1,85	+
chr10	104111602	104111603	ENSG00000107862.4:ENST00000369983.3:chr10:104111602:+	1,20	+
chr10	104130535	104130536	ENSG00000107862.4:ENST00000369983.3:chr10:104130535:+	1,16	+
chr10	104136523	104136524	ENSG00000107862.4:ENST00000369983.3:chr10:104136523:+	1,16	+
chr10	104244054	104244055	ENSG00000138107.7:ENST00000369905.4:chr10:104244054:-	1,54	-
chr10	105037078	105037079	ENSG00000148798.5:ENST00000369849.4:chr10:105037078:+	1,23	+
chr10	105173024	105173025	ENSG00000148843.9:ENST00000369797.3:chr10:105173024:+	2,49	+
chr10	105200083	105200084	ENSG00000148843.9:ENST00000369797.3:chr10:105200083:+	1,51	+
chr20	61907954	61907955	ENSG00000101199.8:ENST00000370283.4:chr20:61907954:+	1,22	+
chrX	153657487	153657488	ENSG00000071553.12:ENST00000369762.2:chrX:153657487:+	1,75	+
chr1	20834496	20834497	ENSG00000090432.5:ENST00000264198.3:chr1:20834496:-	1,17	-
chr1	205074195	205074196	ENSG00000117222.9:ENST00000264515.6:chr1:205074195:-	1,26	-
chr2	27457432	27457433	ENSG00000084774.9:ENST00000264705.4:chr2:27457432:+	1,3	+
chr2	136627869	136627870	ENSG00000076003.4:ENST00000264156.2:chr2:136627869:-	1122	-
chr2	136623754	136623755	ENSG00000076003.4:ENST00000264156.2:chr2:136623754:-	3124	-
chr2	136623775	136623776	ENSG00000076003.4:ENST00000264156.2:chr2:136623775:-	1124	-
chr2	136691524	136691525	ENSG00000115866.6:ENST00000264161.4:chr2:136691524:-	1104	-
chr2	183616502	183616503	ENSG00000077232.12:ENST00000264065.7:chr2:183616502:+	1,22	+
chr2	183622520	183622521	ENSG00000077232.12:ENST00000264065.7:chr2:183622520:+	1,22	+
chr2	234357778	234357779	ENSG00000077044.5:ENST00000264057.2:chr2:234357778:+	1,17	+
chr3	107885757	107885758	ENSG00000114446.4:ENST00000264538.3:chr3:107885757:-	1,21	-
chr3	179439209	179439210	ENSG00000058056.4:ENST00000263966.3:chr3:179439209:+	1,29	+
chr4	42065031	42065032	ENSG00000014824.9:ENST00000264451.7:chr4:42065031:+	1,55	+
chr4	42068592	42068593	ENSG00000014824.9:ENST00000264451.7:chr4:42068592:+	1,55	+
chr17	1303344	1303345	ENSG00000108953.12:ENST00000264335.8:chr17:1303344:-	1225	-
chr17	1265225	1265226	ENSG00000108953.12:ENST00000264335.8:chr17:1265225:-	1225	-
chr17	1265247	1265248	ENSG00000108953.12:ENST00000264335.8:chr17:1265247:-	1225	-
chr17	1257626	1257627	ENSG00000108953.12:ENST00000264335.8:chr17:1257626:-	1225	-
chr17	1248771	1248772	ENSG00000108953.12:ENST00000264335.8:chr17:1248771:-	1225	-
chr17	38142892	38142893	ENSG00000108344.10:ENST00000264639.4:chr17:38142892:+	1,41	+
chr17	38325666	38325667	ENSG00000108349.10:ENST00000264645.7:chr17:38325666:+	1,42	+
chr19	731189	731190	ENSG00000099864.13:ENST00000264560.7:chr19:731189:+	1,3	+
chr19	6495702	6495703	ENSG00000104833.6:ENST00000264071.2:chr19:6495702:-	1,2	-
chr19	6495830	6495831	ENSG00000104833.6:ENST00000264071.2:chr19:6495830:-	1,2	-
chr19	6495856	6495857	ENSG00000104833.6:ENST00000264071.2:chr19:6495856:-	1,2	-
chr19	6495864	6495865	ENSG00000104833.6:ENST00000264071.2:chr19:6495864:-	1,2	-
chr19	6495872	6495873	ENSG00000104833.6:ENST00000264071.2:chr19:6495872:-	1,2	-
chr19	55912849	55912850	ENSG00000108106.9:ENST00000264552.9:chr19:55912849:-	1,12	-
chr1	228582524	228582525	ENSG00000154370.9:ENST00000284551.6:chr1:228582524:-	1,18	-
chr1	228582633	228582634	ENSG00000154370.9:ENST00000284551.6:chr1:228582633:-	1,18	-
chr1	228582665	228582666	ENSG00000154370.9:ENST00000284551.6:chr1:228582665:-	1,18	-
chr3	10074614	10074615	ENSG00000144554.6:ENST00000287647.3:chr3:10074614:+	1,14	+
chr4	44693800	44693801	ENSG00000151806.9:ENST00000281543.5:chr4:44693800:+	1,5	+
chr4	185724572	185724573	ENSG00000151726.9:ENST00000281455.2:chr4:185724572:-	1,21	-
chr4	185697700	185697701	ENSG00000151726.9:ENST00000281455.2:chr4:185697700:-	1,21	-
chr7	27213199	27213200	ENSG00000253293.3:ENST00000283921.4:chr7:27213199:-	1,28	-
chr7	27213760	27213761	ENSG00000253293.3:ENST00000283921.4:chr7:27213760:-	1,27	-
chr10	111881899	111881900	ENSG00000148700.9:ENST00000277900.8:chr10:111881899:+	1,30	+
chr11	57263564	57263565	ENSG00000149150.4:ENST00000278426.3:chr11:57263564:-	1,18	-
chr12	56574881	56574882	ENSG00000139613.7:ENST00000267064.4:chr12:56574881:-	3,24	-
chr12	56563645	56563646	ENSG00000139613.7:ENST00000267064.4:chr12:56563645:-	1,25	-
chr15	89453131	89453132	ENSG00000140545.10:ENST00000268150.8:chr15:89453131:-	1,20	-
chr16	29994873	29994874	ENSG00000149930.13:ENST00000279394.3:chr16:29994873:+	1,2	+
chr17	8452093	8452094	ENSG00000133026.8:ENST00000269243.4:chr17:8452093:-	1138	-
chr17	8448892	8448893	ENSG00000133026.8:ENST00000269243.4:chr17:8448892:-	1138	-
chr17	8439180	8439181	ENSG00000133026.8:ENST00000269243.4:chr17:8439180:-	1138	-
chr17	16089919	16089920	ENSG00000141027.16:ENST00000268712.3:chr17:16089919:-	1,8	-
chr17	15968942	15968943	ENSG00000141027.16:ENST00000268712.3:chr17:15968942:-	1,2	-
chr17	17163759	17163760	ENSG00000141030.8:ENST00000268717.5:chr17:17163759:-	1,46	-
chr17	18785909	18785910	ENSG00000141127.10:ENST00000268835.2:chr17:18785909:+	1,14	+
chr21	30435828	30435829	ENSG00000156261.8:ENST00000286788.4:chr21:30435828:-	1,86	-
chr21	30432895	30432896	ENSG00000156261.8:ENST00000286788.4:chr21:30432895:-	1,84	-
chr3	136016808	136016809	ENSG00000114054.9:ENST00000251654.4:chr3:136016808:+	1,38	+
chr4	17812738	17812739	ENSG00000109805.5:ENST00000251496.2:chr4:17812738:+	1,56	+
chr5	54592057	54592058	ENSG00000067248.5:ENST00000251636.5:chr5:54592057:-	1,8	-
chr7	128388681	128388682	ENSG00000128595.12:ENST00000249364.4:chr7:128388681:+	1202	+
chr7	128407571	128407572	ENSG00000128595.12:ENST00000249364.4:chr7:128407571:+	1203	+
chr9	133993183	133993184	ENSG00000126878.8:ENST00000247291.3:chr9:133993183:+	1,8	+
chr14	59950777	59950778	ENSG00000126790.7:ENST00000247194.4:chr14:59950777:-	1,2	-
chr14	61115752	61115753	ENSG00000126778.7:ENST00000247182.6:chr14:61115752:-	1,24	-
chr14	77272928	77272929	ENSG00000013523.5:ENST00000251089.2:chr14:77272928:-	1,13	-
chr16	780613	780614	ENSG00000103245.9:ENST00000251588.2:chr16:780613:-	1,11	-
chr16	1735542	1735543	ENSG00000206053.8:ENST00000248098.3:chr16:1735542:+	1,98	+
chr16	1748962	1748963	ENSG00000206053.8:ENST00000248098.3:chr16:1748962:+	1100	+
chr16	3714325	3714326	ENSG00000126602.6:ENST00000246957.5:chr16:3714325:-	1177	-
chr16	3712054	3712055	ENSG00000126602.6:ENST00000246957.5:chr16:3712054:-	1177	-
chr16	4412692	4412693	ENSG00000262246.1:ENST00000251166.4:chr16:4412692:-	1,10	-
chr19	3204713	3204714	ENSG00000125912.6:ENST00000246117.4:chr19:3204713:+	1,30	+
chr19	9922063	9922064	ENSG00000127452.4:ENST00000247977.4:chr19:9922063:-	1,4	-
chr19	9958805	9958806	ENSG00000127445.9:ENST00000247970.4:chr19:9958805:+	1,7	+
chr19	39805247	39805248	ENSG00000128011.4:ENST00000248668.4:chr19:39805247:-	2,2	-
chr20	32661399	32661400	ENSG00000125970.7:ENST00000246194.3:chr20:32661399:+	1,13	+
chr22	29182095	29182096	ENSG00000159873.5:ENST00000249064.4:chr22:29182095:+	1,60	+
chr22	29182208	29182209	ENSG00000159873.5:ENST00000249064.4:chr22:29182208:+	1,60	+
chr1	20964396	20964397	ENSG00000158828.5:ENST00000321556.4:chr1:20964396:+	1,28	+
chr1	20966452	20966453	ENSG00000158828.5:ENST00000321556.4:chr1:20966452:+	1,28	+
chr1	20975591	20975592	ENSG00000158828.5:ENST00000321556.4:chr1:20975591:+	1,28	+
chr1	224380121	224380122	ENSG00000143753.8:ENST00000323699.4:chr1:224380121:+	1,70	+
chr1	224380134	224380135	ENSG00000143753.8:ENST00000323699.4:chr1:224380134:+	1,70	+
chr2	128476850	128476851	ENSG00000136709.7:ENST00000322313.4:chr2:128476850:-	1,3	-
chr2	220097323	220097324	ENSG00000163516.9:ENST00000323348.5:chr2:220097323:+	1,6	+
chr2	232327990	232327991	ENSG00000115053.11:ENST00000322723.4:chr2:232327990:-	1704	-
chr2	232326668	232326669	ENSG00000115053.11:ENST00000322723.4:chr2:232326668:-	1707	-
chr2	232326686	232326687	ENSG00000115053.11:ENST00000322723.4:chr2:232326686:-	2707	-
chr2	232324977	232324978	ENSG00000115053.11:ENST00000322723.4:chr2:232324977:-	1726	-
chr2	232322419	232322420	ENSG00000115053.11:ENST00000322723.4:chr2:232322419:-	2726	-
chr2	232321792	232321793	ENSG00000115053.11:ENST00000322723.4:chr2:232321792:-	1727	-
chr2	232320743	232320744	ENSG00000115053.11:ENST00000322723.4:chr2:232320743:-	1729	-
chr2	232320832	232320833	ENSG00000115053.11:ENST00000322723.4:chr2:232320832:-	1729	-
chr2	232320181	232320182	ENSG00000115053.11:ENST00000322723.4:chr2:232320181:-	1728	-
chr3	51429236	51429237	ENSG00000179837.6:ENST00000323686.4:chr3:51429236:+	1,9	+
chr3	127806564	127806565	ENSG00000175792.7:ENST00000322623.5:chr3:127806564:-	1,61	-
chr3	196612291	196612292	ENSG00000119231.6:ENST00000323460.5:chr3:196612291:+	1,3	+
chr4	68534346	68534347	ENSG00000033178.8:ENST00000322244.5:chr4:68534346:-	1,19	-
chr4	68530994	68530995	ENSG00000033178.8:ENST00000322244.5:chr4:68530994:-	1,19	-
chr5	162940938	162940939	ENSG00000038274.12:ENST00000321757.6:chr5:162940938:+	1,25	+
chr5	162943689	162943690	ENSG00000038274.12:ENST00000321757.6:chr5:162943689:+	1,25	+
chr7	56046044	56046045	ENSG00000146729.5:ENST00000322090.3:chr7:56046044:+	1,45	+
chr7	56049212	56049213	ENSG00000146729.5:ENST00000322090.3:chr7:56049212:+	1,45	+
chr7	127222427	127222428	ENSG00000179562.2:ENST00000321407.2:chr7:127222427:-	1,20	-
chr9	131454146	131454147	ENSG00000119335.12:ENST00000322030.8:chr9:131454146:+	1,60	+
chr9	131454988	131454989	ENSG00000119335.12:ENST00000322030.8:chr9:131454988:+	1,60	+
chr9	131456177	131456178	ENSG00000119335.12:ENST00000322030.8:chr9:131456177:+	1,60	+
chr11	65819894	65819895	ENSG00000087365.10:ENST00000322535.6:chr11:65819894:+	1263	+
chr11	65819920	65819921	ENSG00000087365.10:ENST00000322535.6:chr11:65819920:+	1263	+
chr11	65826508	65826509	ENSG00000087365.10:ENST00000322535.6:chr11:65826508:+	3264	+
chr11	65827440	65827441	ENSG00000087365.10:ENST00000322535.6:chr11:65827440:+	1264	+
chr11	65830508	65830509	ENSG00000087365.10:ENST00000322535.6:chr11:65830508:+	1264	+
chr11	65836173	65836174	ENSG00000087365.10:ENST00000322535.6:chr11:65836173:+	1241	+
chr11	67378924	67378925	ENSG00000167792.7:ENST00000322776.6:chr11:67378924:+	1,8	+
chr11	108564291	108564292	ENSG00000178105.5:ENST00000322536.3:chr11:108564291:+	1,69	+
chr11	108593841	108593842	ENSG00000178105.5:ENST00000322536.3:chr11:108593841:+	1,69	+
chr16	19085308	19085309	ENSG00000167186.6:ENST00000321998.5:chr16:19085308:+	1,5	+
chr16	70530311	70530312	ENSG00000103051.14:ENST00000323786.5:chr16:70530311:-	1,41	-
[truncated: 2,080 more rows]

## Sheet: LR-Ribo-STAMP_rep1
chr4	83801997	83801998	ENSG00000138674.12:ENST00000395310.2:chr4:83801997:-	1,31	-
[truncated: 50,068 more rows]

[truncated: 2 more sheets: LR-Ribo-STAMP_rep2, LR-Ribo-STAMP_rep3]
