# Supplementary material for: Long-read Ribo-STAMP simultaneously measures transcription and translation with isoform resolution
Source: HighWire-hosted journal article supplement (doi:10.1101/gr.279176.124), 2024-06-21
Supplement: Supplemental_Table_2.xlsx [file Supplemental_Table_2.xlsx]

## Sheet: Description
Supplemental Table 2: Isoform-level edits called for LR-Ribo-STAMP data generated from MDA-MB-231 cells in normoxia (NT) and hypoxia(CoCl2) conditions

## Sheet: CoCl2_rep1
chr1	32222593	32222594	ENSG00000084623.12:ENST00000677378.1:chr1:32222593:+	1,5	+
chr1	32224091	32224092	ENSG00000084623.12:ENST00000677378.1:chr1:32224091:+	1,5	+
chr1	32224443	32224444	ENSG00000084623.12:ENST00000677378.1:chr1:32224443:+	1,5	+
chr1	32226187	32226188	ENSG00000084623.12:ENST00000677378.1:chr1:32226187:+	1,5	+
chr1	32226403	32226404	ENSG00000084623.12:ENST00000677378.1:chr1:32226403:+	1,5	+
chr1	32231144	32231145	ENSG00000084623.12:ENST00000677378.1:chr1:32231144:+	1,5	+
chr1	32231171	32231172	ENSG00000084623.12:ENST00000677378.1:chr1:32231171:+	1,5	+
chr2	73831035	73831036	ENSG00000124356.17:ENST00000683518.1:chr2:73831035:+	1,13	+
chr3	100713723	100713724	ENSG00000114354.15:ENST00000240851.9:chr3:100713723:+	1214	+
chr3	100713796	100713797	ENSG00000114354.15:ENST00000240851.9:chr3:100713796:+	1214	+
chr3	100713808	100713809	ENSG00000114354.15:ENST00000240851.9:chr3:100713808:+	1214	+
chr3	100713848	100713849	ENSG00000114354.15:ENST00000240851.9:chr3:100713848:+	1214	+
chr3	100720004	100720005	ENSG00000114354.15:ENST00000240851.9:chr3:100720004:+	1214	+
chr3	100720039	100720040	ENSG00000114354.15:ENST00000240851.9:chr3:100720039:+	1214	+
chr3	100720045	100720046	ENSG00000114354.15:ENST00000240851.9:chr3:100720045:+	1214	+
chr3	100720049	100720050	ENSG00000114354.15:ENST00000240851.9:chr3:100720049:+	1213	+
chr3	100728728	100728729	ENSG00000114354.15:ENST00000240851.9:chr3:100728728:+	1213	+
chr3	100728815	100728816	ENSG00000114354.15:ENST00000240851.9:chr3:100728815:+	2214	+
chr3	100728827	100728828	ENSG00000114354.15:ENST00000240851.9:chr3:100728827:+	1214	+
chr3	100728837	100728838	ENSG00000114354.15:ENST00000240851.9:chr3:100728837:+	1214	+
chr3	100728840	100728841	ENSG00000114354.15:ENST00000240851.9:chr3:100728840:+	1214	+
chr3	100732510	100732511	ENSG00000114354.15:ENST00000240851.9:chr3:100732510:+	1214	+
chr3	100732591	100732592	ENSG00000114354.15:ENST00000240851.9:chr3:100732591:+	1214	+
chr3	100732610	100732611	ENSG00000114354.15:ENST00000240851.9:chr3:100732610:+	1214	+
chr3	100732622	100732623	ENSG00000114354.15:ENST00000240851.9:chr3:100732622:+	1214	+
chr3	100732639	100732640	ENSG00000114354.15:ENST00000240851.9:chr3:100732639:+	1214	+
chr3	100732662	100732663	ENSG00000114354.15:ENST00000240851.9:chr3:100732662:+	1214	+
chr3	100736611	100736612	ENSG00000114354.15:ENST00000240851.9:chr3:100736611:+	1214	+
chr3	100736618	100736619	ENSG00000114354.15:ENST00000240851.9:chr3:100736618:+	3214	+
chr3	100736632	100736633	ENSG00000114354.15:ENST00000240851.9:chr3:100736632:+	1213	+
chr3	100736648	100736649	ENSG00000114354.15:ENST00000240851.9:chr3:100736648:+	1214	+
chr3	100736652	100736653	ENSG00000114354.15:ENST00000240851.9:chr3:100736652:+	1214	+
chr3	100736683	100736684	ENSG00000114354.15:ENST00000240851.9:chr3:100736683:+	1214	+
chr3	100744842	100744843	ENSG00000114354.15:ENST00000240851.9:chr3:100744842:+	2214	+
chr3	100744866	100744867	ENSG00000114354.15:ENST00000240851.9:chr3:100744866:+	1214	+
chr3	100744894	100744895	ENSG00000114354.15:ENST00000240851.9:chr3:100744894:+	2214	+
chr3	100744906	100744907	ENSG00000114354.15:ENST00000240851.9:chr3:100744906:+	1214	+
chr3	100744909	100744910	ENSG00000114354.15:ENST00000240851.9:chr3:100744909:+	1214	+
chr3	100748166	100748167	ENSG00000114354.15:ENST00000240851.9:chr3:100748166:+	1214	+
chr3	100748171	100748172	ENSG00000114354.15:ENST00000240851.9:chr3:100748171:+	1214	+
chr3	100748183	100748184	ENSG00000114354.15:ENST00000240851.9:chr3:100748183:+	1214	+
chr3	100748246	100748247	ENSG00000114354.15:ENST00000240851.9:chr3:100748246:+	1214	+
chr3	100748255	100748256	ENSG00000114354.15:ENST00000240851.9:chr3:100748255:+	1214	+
chr3	100748310	100748311	ENSG00000114354.15:ENST00000240851.9:chr3:100748310:+	1214	+
chr3	100748346	100748347	ENSG00000114354.15:ENST00000240851.9:chr3:100748346:+	1214	+
chr3	100748442	100748443	ENSG00000114354.15:ENST00000240851.9:chr3:100748442:+	2213	+
chr3	100748448	100748449	ENSG00000114354.15:ENST00000240851.9:chr3:100748448:+	1214	+
chr3	100748450	100748451	ENSG00000114354.15:ENST00000240851.9:chr3:100748450:+	1213	+
chr3	100748486	100748487	ENSG00000114354.15:ENST00000240851.9:chr3:100748486:+	1212	+
chr4	82880894	82880895	ENSG00000138674.17:ENST00000395310.7:chr4:82880894:-	1,2	-
chr4	82856998	82856999	ENSG00000138674.17:ENST00000395310.7:chr4:82856998:-	1,2	-
chr4	82819092	82819093	ENSG00000138674.17:ENST00000395310.7:chr4:82819092:-	1,3	-
chr7	99388228	99388229	ENSG00000130429.15:ENST00000427217.6:chr7:99388228:+	1,6	+
chr8	143586755	143586756	ENSG00000104529.18:ENST00000529272.5:chr8:143586755:-	1,20	-
chr8	143586236	143586237	ENSG00000104529.18:ENST00000529272.5:chr8:143586236:-	1,20	-
chr8	143586239	143586240	ENSG00000104529.18:ENST00000529272.5:chr8:143586239:-	1,20	-
chr8	143586284	143586285	ENSG00000104529.18:ENST00000529272.5:chr8:143586284:-	2,20	-
chr8	143580511	143580512	ENSG00000104529.18:ENST00000529272.5:chr8:143580511:-	1,20	-
chr8	143580643	143580644	ENSG00000104529.18:ENST00000529272.5:chr8:143580643:-	1,20	-
chr8	143580677	143580678	ENSG00000104529.18:ENST00000529272.5:chr8:143580677:-	1,20	-
chr8	143580051	143580052	ENSG00000104529.18:ENST00000529272.5:chr8:143580051:-	1,20	-
chr8	143579810	143579811	ENSG00000104529.18:ENST00000529272.5:chr8:143579810:-	1,20	-
chr10	133283143	133283144	ENSG00000130640.15:ENST00000683014.1:chr10:133283143:-	1,1	-
chr14	96833492	96833493	ENSG00000100749.9:ENST00000216639.8:chr14:96833492:+	1,91	+
chr14	96846105	96846106	ENSG00000100749.9:ENST00000216639.8:chr14:96846105:+	2,91	+
chr14	96846112	96846113	ENSG00000100749.9:ENST00000216639.8:chr14:96846112:+	1,91	+
chr14	96847290	96847291	ENSG00000100749.9:ENST00000216639.8:chr14:96847290:+	1,91	+
chr14	96847329	96847330	ENSG00000100749.9:ENST00000216639.8:chr14:96847329:+	1,91	+
chr14	96852833	96852834	ENSG00000100749.9:ENST00000216639.8:chr14:96852833:+	1,91	+
chr14	96853147	96853148	ENSG00000100749.9:ENST00000216639.8:chr14:96853147:+	2,91	+
chr14	96853157	96853158	ENSG00000100749.9:ENST00000216639.8:chr14:96853157:+	1,91	+
chr14	96855294	96855295	ENSG00000100749.9:ENST00000216639.8:chr14:96855294:+	1,91	+
chr14	96855309	96855310	ENSG00000100749.9:ENST00000216639.8:chr14:96855309:+	2,91	+
chr14	96855327	96855328	ENSG00000100749.9:ENST00000216639.8:chr14:96855327:+	1,91	+
chr14	96855329	96855330	ENSG00000100749.9:ENST00000216639.8:chr14:96855329:+	1,91	+
chr14	96856135	96856136	ENSG00000100749.9:ENST00000216639.8:chr14:96856135:+	1,91	+
chr14	96856557	96856558	ENSG00000100749.9:ENST00000216639.8:chr14:96856557:+	1,91	+
chr14	96856578	96856579	ENSG00000100749.9:ENST00000216639.8:chr14:96856578:+	1,91	+
chr14	96860627	96860628	ENSG00000100749.9:ENST00000216639.8:chr14:96860627:+	1,91	+
chr14	96860648	96860649	ENSG00000100749.9:ENST00000216639.8:chr14:96860648:+	2,91	+
chr14	96860730	96860731	ENSG00000100749.9:ENST00000216639.8:chr14:96860730:+	1,91	+
chr14	96876095	96876096	ENSG00000100749.9:ENST00000216639.8:chr14:96876095:+	1,91	+
chr14	96881179	96881180	ENSG00000100749.9:ENST00000216639.8:chr14:96881179:+	1,91	+
chr16	3068992	3068993	ENSG00000008517.19:ENST00000325568.9:chr16:3068992:+	1,12	+
chr17	42348410	42348411	ENSG00000168610.16:ENST00000588969.5:chr17:42348410:-	1,7	-
chr17	42337436	42337437	ENSG00000168610.16:ENST00000588969.5:chr17:42337436:-	1,7	-
chr17	42329556	42329557	ENSG00000168610.16:ENST00000588969.5:chr17:42329556:-	1,7	-
chr17	42324728	42324729	ENSG00000168610.16:ENST00000588969.5:chr17:42324728:-	1,7	-
chr17	42323343	42323344	ENSG00000168610.16:ENST00000588969.5:chr17:42323343:-	1,7	-
chr17	42323100	42323101	ENSG00000168610.16:ENST00000588969.5:chr17:42323100:-	1,7	-
chr17	81860338	81860339	ENSG00000185624.16:ENST00000331483.9:chr17:81860338:-	22277	-
chr17	81860367	81860368	ENSG00000185624.16:ENST00000331483.9:chr17:81860367:-	12273	-
chr17	81860386	81860387	ENSG00000185624.16:ENST00000331483.9:chr17:81860386:-	22267	-
chr17	81860398	81860399	ENSG00000185624.16:ENST00000331483.9:chr17:81860398:-	12262	-
chr17	81860414	81860415	ENSG00000185624.16:ENST00000331483.9:chr17:81860414:-	12258	-
chr17	81860420	81860421	ENSG00000185624.16:ENST00000331483.9:chr17:81860420:-	12258	-
chr17	81860421	81860422	ENSG00000185624.16:ENST00000331483.9:chr17:81860421:-	22257	-
chr17	81860425	81860426	ENSG00000185624.16:ENST00000331483.9:chr17:81860425:-	12257	-
chr17	81860442	81860443	ENSG00000185624.16:ENST00000331483.9:chr17:81860442:-	12256	-
chr17	81860455	81860456	ENSG00000185624.16:ENST00000331483.9:chr17:81860455:-	22253	-
chr17	81860464	81860465	ENSG00000185624.16:ENST00000331483.9:chr17:81860464:-	12252	-
chr17	81859196	81859197	ENSG00000185624.16:ENST00000331483.9:chr17:81859196:-	12278	-
chr17	81859234	81859235	ENSG00000185624.16:ENST00000331483.9:chr17:81859234:-	22278	-
chr17	81859260	81859261	ENSG00000185624.16:ENST00000331483.9:chr17:81859260:-	12278	-
chr17	81859269	81859270	ENSG00000185624.16:ENST00000331483.9:chr17:81859269:-	32278	-
chr17	81859292	81859293	ENSG00000185624.16:ENST00000331483.9:chr17:81859292:-	22277	-
chr17	81859293	81859294	ENSG00000185624.16:ENST00000331483.9:chr17:81859293:-	12278	-
chr17	81859307	81859308	ENSG00000185624.16:ENST00000331483.9:chr17:81859307:-	12278	-
chr17	81859332	81859333	ENSG00000185624.16:ENST00000331483.9:chr17:81859332:-	22278	-
chr17	81859341	81859342	ENSG00000185624.16:ENST00000331483.9:chr17:81859341:-	12278	-
chr17	81859352	81859353	ENSG00000185624.16:ENST00000331483.9:chr17:81859352:-	12278	-
chr17	81859359	81859360	ENSG00000185624.16:ENST00000331483.9:chr17:81859359:-	12278	-
chr17	81859383	81859384	ENSG00000185624.16:ENST00000331483.9:chr17:81859383:-	12278	-
chr17	81855495	81855496	ENSG00000185624.16:ENST00000331483.9:chr17:81855495:-	42278	-
chr17	81855501	81855502	ENSG00000185624.16:ENST00000331483.9:chr17:81855501:-	12278	-
chr17	81855504	81855505	ENSG00000185624.16:ENST00000331483.9:chr17:81855504:-	12277	-
chr17	81855516	81855517	ENSG00000185624.16:ENST00000331483.9:chr17:81855516:-	12276	-
chr17	81855517	81855518	ENSG00000185624.16:ENST00000331483.9:chr17:81855517:-	12278	-
chr17	81855520	81855521	ENSG00000185624.16:ENST00000331483.9:chr17:81855520:-	12275	-
chr17	81855531	81855532	ENSG00000185624.16:ENST00000331483.9:chr17:81855531:-	22278	-
chr17	81855553	81855554	ENSG00000185624.16:ENST00000331483.9:chr17:81855553:-	12278	-
chr17	81855573	81855574	ENSG00000185624.16:ENST00000331483.9:chr17:81855573:-	12278	-
chr17	81855581	81855582	ENSG00000185624.16:ENST00000331483.9:chr17:81855581:-	12277	-
chr17	81855184	81855185	ENSG00000185624.16:ENST00000331483.9:chr17:81855184:-	12278	-
chr17	81855186	81855187	ENSG00000185624.16:ENST00000331483.9:chr17:81855186:-	32278	-
chr17	81855205	81855206	ENSG00000185624.16:ENST00000331483.9:chr17:81855205:-	12278	-
chr17	81855207	81855208	ENSG00000185624.16:ENST00000331483.9:chr17:81855207:-	12278	-
chr17	81855241	81855242	ENSG00000185624.16:ENST00000331483.9:chr17:81855241:-	22278	-
chr17	81855262	81855263	ENSG00000185624.16:ENST00000331483.9:chr17:81855262:-	12278	-
chr17	81855268	81855269	ENSG00000185624.16:ENST00000331483.9:chr17:81855268:-	42278	-
chr17	81847265	81847266	ENSG00000185624.16:ENST00000331483.9:chr17:81847265:-	12266	-
chr17	81847266	81847267	ENSG00000185624.16:ENST00000331483.9:chr17:81847266:-	12278	-
chr17	81847268	81847269	ENSG00000185624.16:ENST00000331483.9:chr17:81847268:-	12278	-
chr17	81847271	81847272	ENSG00000185624.16:ENST00000331483.9:chr17:81847271:-	12278	-
chr17	81847274	81847275	ENSG00000185624.16:ENST00000331483.9:chr17:81847274:-	12277	-
chr17	81847275	81847276	ENSG00000185624.16:ENST00000331483.9:chr17:81847275:-	12278	-
chr17	81847308	81847309	ENSG00000185624.16:ENST00000331483.9:chr17:81847308:-	12276	-
chr17	81847311	81847312	ENSG00000185624.16:ENST00000331483.9:chr17:81847311:-	42278	-
chr17	81847334	81847335	ENSG00000185624.16:ENST00000331483.9:chr17:81847334:-	12276	-
chr17	81847335	81847336	ENSG00000185624.16:ENST00000331483.9:chr17:81847335:-	22278	-
chr17	81846958	81846959	ENSG00000185624.16:ENST00000331483.9:chr17:81846958:-	12278	-
chr17	81847029	81847030	ENSG00000185624.16:ENST00000331483.9:chr17:81847029:-	12272	-
chr17	81847067	81847068	ENSG00000185624.16:ENST00000331483.9:chr17:81847067:-	12278	-
chr17	81846452	81846453	ENSG00000185624.16:ENST00000331483.9:chr17:81846452:-	22278	-
chr17	81846477	81846478	ENSG00000185624.16:ENST00000331483.9:chr17:81846477:-	12278	-
chr17	81846484	81846485	ENSG00000185624.16:ENST00000331483.9:chr17:81846484:-	12278	-
chr17	81846498	81846499	ENSG00000185624.16:ENST00000331483.9:chr17:81846498:-	12278	-
chr17	81846499	81846500	ENSG00000185624.16:ENST00000331483.9:chr17:81846499:-	12278	-
chr17	81846527	81846528	ENSG00000185624.16:ENST00000331483.9:chr17:81846527:-	12278	-
chr17	81846533	81846534	ENSG00000185624.16:ENST00000331483.9:chr17:81846533:-	32278	-
chr17	81846536	81846537	ENSG00000185624.16:ENST00000331483.9:chr17:81846536:-	12278	-
chr17	81846546	81846547	ENSG00000185624.16:ENST00000331483.9:chr17:81846546:-	12272	-
chr17	81846580	81846581	ENSG00000185624.16:ENST00000331483.9:chr17:81846580:-	22276	-
chr17	81846584	81846585	ENSG00000185624.16:ENST00000331483.9:chr17:81846584:-	12277	-
chr17	81846586	81846587	ENSG00000185624.16:ENST00000331483.9:chr17:81846586:-	22278	-
chr17	81845871	81845872	ENSG00000185624.16:ENST00000331483.9:chr17:81845871:-	32278	-
chr17	81845905	81845906	ENSG00000185624.16:ENST00000331483.9:chr17:81845905:-	22278	-
chr17	81845965	81845966	ENSG00000185624.16:ENST00000331483.9:chr17:81845965:-	22275	-
chr17	81845569	81845570	ENSG00000185624.16:ENST00000331483.9:chr17:81845569:-	12270	-
chr17	81845580	81845581	ENSG00000185624.16:ENST00000331483.9:chr17:81845580:-	32278	-
chr17	81845597	81845598	ENSG00000185624.16:ENST00000331483.9:chr17:81845597:-	12278	-
chr17	81845602	81845603	ENSG00000185624.16:ENST00000331483.9:chr17:81845602:-	12278	-
chr17	81845607	81845608	ENSG00000185624.16:ENST00000331483.9:chr17:81845607:-	22278	-
chr17	81845614	81845615	ENSG00000185624.16:ENST00000331483.9:chr17:81845614:-	22278	-
chr17	81845618	81845619	ENSG00000185624.16:ENST00000331483.9:chr17:81845618:-	12278	-
chr17	81845633	81845634	ENSG00000185624.16:ENST00000331483.9:chr17:81845633:-	12278	-
chr17	81845639	81845640	ENSG00000185624.16:ENST00000331483.9:chr17:81845639:-	22278	-
chr17	81845650	81845651	ENSG00000185624.16:ENST00000331483.9:chr17:81845650:-	12274	-
chr17	81845651	81845652	ENSG00000185624.16:ENST00000331483.9:chr17:81845651:-	32278	-
chr17	81845704	81845705	ENSG00000185624.16:ENST00000331483.9:chr17:81845704:-	12265	-
chr17	81845706	81845707	ENSG00000185624.16:ENST00000331483.9:chr17:81845706:-	12278	-
chr17	81845708	81845709	ENSG00000185624.16:ENST00000331483.9:chr17:81845708:-	12278	-
chr17	81845724	81845725	ENSG00000185624.16:ENST00000331483.9:chr17:81845724:-	12278	-
chr17	81845736	81845737	ENSG00000185624.16:ENST00000331483.9:chr17:81845736:-	12278	-
chr17	81845156	81845157	ENSG00000185624.16:ENST00000331483.9:chr17:81845156:-	12278	-
chr17	81845182	81845183	ENSG00000185624.16:ENST00000331483.9:chr17:81845182:-	32278	-
chr17	81845202	81845203	ENSG00000185624.16:ENST00000331483.9:chr17:81845202:-	12278	-
chr17	81844069	81844070	ENSG00000185624.16:ENST00000331483.9:chr17:81844069:-	12278	-
chr17	81844079	81844080	ENSG00000185624.16:ENST00000331483.9:chr17:81844079:-	12276	-
chr19	11025480	11025481	ENSG00000127616.20:ENST00000646484.1:chr19:11025480:+	1,1	+
chr19	11026327	11026328	ENSG00000127616.20:ENST00000646484.1:chr19:11026327:+	1,1	+
chr19	11034951	11034952	ENSG00000127616.20:ENST00000646484.1:chr19:11034951:+	1,1	+
chr20	31721786	31721787	ENSG00000171552.14:ENST00000420488.6:chr20:31721786:-	1,2	-
chr20	45416239	45416240	ENSG00000124155.18:ENST00000543458.7:chr20:45416239:+	1,16	+
chr20	45419391	45419392	ENSG00000124155.18:ENST00000543458.7:chr20:45419391:+	1,16	+
chr20	45419541	45419542	ENSG00000124155.18:ENST00000543458.7:chr20:45419541:+	1,16	+
chr20	45421509	45421510	ENSG00000124155.18:ENST00000543458.7:chr20:45421509:+	1,16	+
chr1	120176312	120176313	ENSG00000265808.4:ENST00000578049.4:chr1:120176312:-	1,79	-
chr1	120176345	120176346	ENSG00000265808.4:ENST00000578049.4:chr1:120176345:-	1,79	-
chr1	120168885	120168886	ENSG00000265808.4:ENST00000578049.4:chr1:120168885:-	3,79	-
chr1	120168900	120168901	ENSG00000265808.4:ENST00000578049.4:chr1:120168900:-	1,79	-
chr1	120168906	120168907	ENSG00000265808.4:ENST00000578049.4:chr1:120168906:-	1,79	-
chr1	120168924	120168925	ENSG00000265808.4:ENST00000578049.4:chr1:120168924:-	1,79	-
chr1	120168930	120168931	ENSG00000265808.4:ENST00000578049.4:chr1:120168930:-	2,79	-
chr1	120168933	120168934	ENSG00000265808.4:ENST00000578049.4:chr1:120168933:-	1,79	-
chr1	120163241	120163242	ENSG00000265808.4:ENST00000578049.4:chr1:120163241:-	2,79	-
chr1	120163260	120163261	ENSG00000265808.4:ENST00000578049.4:chr1:120163260:-	1,79	-
chr1	120163263	120163264	ENSG00000265808.4:ENST00000578049.4:chr1:120163263:-	1,79	-
chr1	120163279	120163280	ENSG00000265808.4:ENST00000578049.4:chr1:120163279:-	3,79	-
chr1	120163317	120163318	ENSG00000265808.4:ENST00000578049.4:chr1:120163317:-	1,79	-
chr1	120160385	120160386	ENSG00000265808.4:ENST00000578049.4:chr1:120160385:-	1,79	-
chr1	120160457	120160458	ENSG00000265808.4:ENST00000578049.4:chr1:120160457:-	1,79	-
chr1	120160482	120160483	ENSG00000265808.4:ENST00000578049.4:chr1:120160482:-	1,79	-
chr1	120160488	120160489	ENSG00000265808.4:ENST00000578049.4:chr1:120160488:-	1,79	-
chr1	120160498	120160499	ENSG00000265808.4:ENST00000578049.4:chr1:120160498:-	1,79	-
chr1	120157073	120157074	ENSG00000265808.4:ENST00000578049.4:chr1:120157073:-	1,80	-
chr1	120157145	120157146	ENSG00000265808.4:ENST00000578049.4:chr1:120157145:-	1,80	-
chr1	149943937	149943938	ENSG00000264522.6:ENST00000581312.6:chr1:149943937:-	1,5	-
chr1	206585245	206585246	ENSG00000266094.8:ENST00000577571.5:chr1:206585245:+	1,6	+
chr10	45972655	45972656	ENSG00000265354.4:ENST00000580018.4:chr10:45972655:+	4329	+
chr10	45972658	45972659	ENSG00000265354.4:ENST00000580018.4:chr10:45972658:+	2329	+
chr10	45972701	45972702	ENSG00000265354.4:ENST00000580018.4:chr10:45972701:+	2339	+
chr10	45972703	45972704	ENSG00000265354.4:ENST00000580018.4:chr10:45972703:+	3339	+
chr10	45972707	45972708	ENSG00000265354.4:ENST00000580018.4:chr10:45972707:+	1339	+
chr10	45972722	45972723	ENSG00000265354.4:ENST00000580018.4:chr10:45972722:+	1339	+
chr10	45975456	45975457	ENSG00000265354.4:ENST00000580018.4:chr10:45975456:+	1339	+
chr10	45975476	45975477	ENSG00000265354.4:ENST00000580018.4:chr10:45975476:+	1339	+
chr10	45975502	45975503	ENSG00000265354.4:ENST00000580018.4:chr10:45975502:+	1339	+
chr10	45975505	45975506	ENSG00000265354.4:ENST00000580018.4:chr10:45975505:+	1339	+
chr10	45982526	45982527	ENSG00000265354.4:ENST00000580018.4:chr10:45982526:+	1339	+
chr10	45982543	45982544	ENSG00000265354.4:ENST00000580018.4:chr10:45982543:+	1339	+
chr10	45982587	45982588	ENSG00000265354.4:ENST00000580018.4:chr10:45982587:+	1339	+
chr10	45982592	45982593	ENSG00000265354.4:ENST00000580018.4:chr10:45982592:+	4339	+
chr10	45982613	45982614	ENSG00000265354.4:ENST00000580018.4:chr10:45982613:+	3339	+
chr10	45982900	45982901	ENSG00000265354.4:ENST00000580018.4:chr10:45982900:+	3360	+
chr10	45985426	45985427	ENSG00000265354.4:ENST00000580018.4:chr10:45985426:+	7361	+
chr10	45985437	45985438	ENSG00000265354.4:ENST00000580018.4:chr10:45985437:+	2361	+
chr10	45988794	45988795	ENSG00000265354.4:ENST00000580018.4:chr10:45988794:+	1361	+
chr10	45988795	45988796	ENSG00000265354.4:ENST00000580018.4:chr10:45988795:+	1361	+
chr10	45988802	45988803	ENSG00000265354.4:ENST00000580018.4:chr10:45988802:+	1361	+
chr10	45988817	45988818	ENSG00000265354.4:ENST00000580018.4:chr10:45988817:+	3362	+
chr10	45988823	45988824	ENSG00000265354.4:ENST00000580018.4:chr10:45988823:+	4362	+
chr10	45988844	45988845	ENSG00000265354.4:ENST00000580018.4:chr10:45988844:+	2362	+
chr10	46003250	46003251	ENSG00000265354.4:ENST00000580018.4:chr10:46003250:+	2362	+
chr10	46003254	46003255	ENSG00000265354.4:ENST00000580018.4:chr10:46003254:+	1362	+
chr10	46003257	46003258	ENSG00000265354.4:ENST00000580018.4:chr10:46003257:+	1362	+
chr10	46003300	46003301	ENSG00000265354.4:ENST00000580018.4:chr10:46003300:+	1362	+
chr10	46003302	46003303	ENSG00000265354.4:ENST00000580018.4:chr10:46003302:+	1361	+
chr10	46003312	46003313	ENSG00000265354.4:ENST00000580018.4:chr10:46003312:+	1362	+
chr16	3026530	3026531	ENSG00000131652.14:ENST00000574549.5:chr16:3026530:+	1,8	+
chr16	3027619	3027620	ENSG00000131652.14:ENST00000574549.5:chr16:3027619:+	1,8	+
chr16	3504725	3504726	ENSG00000103351.13:ENST00000576634.6:chr16:3504725:+	1,23	+
chr16	3506360	3506361	ENSG00000103351.13:ENST00000576634.6:chr16:3506360:+	1,23	+
chr16	3508300	3508301	ENSG00000103351.13:ENST00000576634.6:chr16:3508300:+	1,23	+
chr16	3519903	3519904	ENSG00000103351.13:ENST00000576634.6:chr16:3519903:+	1,23	+
chr16	3520010	3520011	ENSG00000103351.13:ENST00000576634.6:chr16:3520010:+	1,22	+
chr16	3526424	3526425	ENSG00000103351.13:ENST00000576634.6:chr16:3526424:+	1,22	+
chr16	3532799	3532800	ENSG00000103351.13:ENST00000576634.6:chr16:3532799:+	1,22	+
chr16	3536220	3536221	ENSG00000103351.13:ENST00000576634.6:chr16:3536220:+	1,22	+
chr16	14240398	14240399	ENSG00000186260.17:ENST00000572567.5:chr16:14240398:+	1,1	+
chr17	5419363	5419364	ENSG00000108559.12:ENST00000573584.6:chr17:5419363:-	1140	-
chr17	5419383	5419384	ENSG00000108559.12:ENST00000573584.6:chr17:5419383:-	1140	-
chr17	5419443	5419444	ENSG00000108559.12:ENST00000573584.6:chr17:5419443:-	1139	-
chr17	5419473	5419474	ENSG00000108559.12:ENST00000573584.6:chr17:5419473:-	1139	-
chr17	5419519	5419520	ENSG00000108559.12:ENST00000573584.6:chr17:5419519:-	1137	-
chr17	5419526	5419527	ENSG00000108559.12:ENST00000573584.6:chr17:5419526:-	1137	-
chr17	5419587	5419588	ENSG00000108559.12:ENST00000573584.6:chr17:5419587:-	1134	-
chr17	5416588	5416589	ENSG00000108559.12:ENST00000573584.6:chr17:5416588:-	1142	-
chr17	5416615	5416616	ENSG00000108559.12:ENST00000573584.6:chr17:5416615:-	1141	-
chr17	5416646	5416647	ENSG00000108559.12:ENST00000573584.6:chr17:5416646:-	1141	-
chr17	5416660	5416661	ENSG00000108559.12:ENST00000573584.6:chr17:5416660:-	1141	-
chr17	5416663	5416664	ENSG00000108559.12:ENST00000573584.6:chr17:5416663:-	1141	-
chr17	5416670	5416671	ENSG00000108559.12:ENST00000573584.6:chr17:5416670:-	2141	-
chr17	5414010	5414011	ENSG00000108559.12:ENST00000573584.6:chr17:5414010:-	1143	-
chr17	5414086	5414087	ENSG00000108559.12:ENST00000573584.6:chr17:5414086:-	2143	-
chr17	5414104	5414105	ENSG00000108559.12:ENST00000573584.6:chr17:5414104:-	1143	-
chr17	5414131	5414132	ENSG00000108559.12:ENST00000573584.6:chr17:5414131:-	1143	-
chr17	5410712	5410713	ENSG00000108559.12:ENST00000573584.6:chr17:5410712:-	2145	-
chr17	5410762	5410763	ENSG00000108559.12:ENST00000573584.6:chr17:5410762:-	1145	-
chr17	5408736	5408737	ENSG00000108559.12:ENST00000573584.6:chr17:5408736:-	1146	-
chr17	5408749	5408750	ENSG00000108559.12:ENST00000573584.6:chr17:5408749:-	2146	-
chr17	5408753	5408754	ENSG00000108559.12:ENST00000573584.6:chr17:5408753:-	2146	-
chr17	5408762	5408763	ENSG00000108559.12:ENST00000573584.6:chr17:5408762:-	1145	-
chr17	5408785	5408786	ENSG00000108559.12:ENST00000573584.6:chr17:5408785:-	1145	-
chr17	5408818	5408819	ENSG00000108559.12:ENST00000573584.6:chr17:5408818:-	2145	-
chr17	5408823	5408824	ENSG00000108559.12:ENST00000573584.6:chr17:5408823:-	2145	-
chr17	5408879	5408880	ENSG00000108559.12:ENST00000573584.6:chr17:5408879:-	2145	-
chr17	5408889	5408890	ENSG00000108559.12:ENST00000573584.6:chr17:5408889:-	1145	-
chr17	5405095	5405096	ENSG00000108559.12:ENST00000573584.6:chr17:5405095:-	1149	-
chr17	5405103	5405104	ENSG00000108559.12:ENST00000573584.6:chr17:5405103:-	1149	-
chr17	5405117	5405118	ENSG00000108559.12:ENST00000573584.6:chr17:5405117:-	1149	-
chr17	5405122	5405123	ENSG00000108559.12:ENST00000573584.6:chr17:5405122:-	1149	-
chr17	5405148	5405149	ENSG00000108559.12:ENST00000573584.6:chr17:5405148:-	1148	-
chr17	5404116	5404117	ENSG00000108559.12:ENST00000573584.6:chr17:5404116:-	1152	-
chr17	5404121	5404122	ENSG00000108559.12:ENST00000573584.6:chr17:5404121:-	1152	-
chr17	5404126	5404127	ENSG00000108559.12:ENST00000573584.6:chr17:5404126:-	1152	-
chr17	5404141	5404142	ENSG00000108559.12:ENST00000573584.6:chr17:5404141:-	1152	-
chr17	5399560	5399561	ENSG00000108559.12:ENST00000573584.6:chr17:5399560:-	1154	-
chr17	5399586	5399587	ENSG00000108559.12:ENST00000573584.6:chr17:5399586:-	1154	-
chr17	5399634	5399635	ENSG00000108559.12:ENST00000573584.6:chr17:5399634:-	2153	-
chr17	5394919	5394920	ENSG00000108559.12:ENST00000573584.6:chr17:5394919:-	1156	-
chr17	5394944	5394945	ENSG00000108559.12:ENST00000573584.6:chr17:5394944:-	1156	-
chr17	5391622	5391623	ENSG00000108559.12:ENST00000573584.6:chr17:5391622:-	1156	-
chr17	5391645	5391646	ENSG00000108559.12:ENST00000573584.6:chr17:5391645:-	1156	-
chr17	5391651	5391652	ENSG00000108559.12:ENST00000573584.6:chr17:5391651:-	1156	-
chr17	5388919	5388920	ENSG00000108559.12:ENST00000573584.6:chr17:5388919:-	1157	-
chr17	5388946	5388947	ENSG00000108559.12:ENST00000573584.6:chr17:5388946:-	1157	-
chr17	5387809	5387810	ENSG00000108559.12:ENST00000573584.6:chr17:5387809:-	1160	-
chr17	5387852	5387853	ENSG00000108559.12:ENST00000573584.6:chr17:5387852:-	1160	-
chr17	5387429	5387430	ENSG00000108559.12:ENST00000573584.6:chr17:5387429:-	1121	-
chr17	5387458	5387459	ENSG00000108559.12:ENST00000573584.6:chr17:5387458:-	1121	-
chr17	5387006	5387007	ENSG00000108559.12:ENST00000573584.6:chr17:5387006:-	1121	-
chr17	5387064	5387065	ENSG00000108559.12:ENST00000573584.6:chr17:5387064:-	1121	-
chr17	5387084	5387085	ENSG00000108559.12:ENST00000573584.6:chr17:5387084:-	1121	-
chr17	5387091	5387092	ENSG00000108559.12:ENST00000573584.6:chr17:5387091:-	1121	-
chr17	5387096	5387097	ENSG00000108559.12:ENST00000573584.6:chr17:5387096:-	2121	-
chr17	5386821	5386822	ENSG00000108559.12:ENST00000573584.6:chr17:5386821:-	1121	-
chr17	5386226	5386227	ENSG00000108559.12:ENST00000573584.6:chr17:5386226:-	1120	-
chr17	5386240	5386241	ENSG00000108559.12:ENST00000573584.6:chr17:5386240:-	1120	-
chr17	7247307	7247308	ENSG00000175826.12:ENST00000574322.6:chr17:7247307:-	1,28	-
chr17	7247336	7247337	ENSG00000175826.12:ENST00000574322.6:chr17:7247336:-	1,27	-
chr17	7247131	7247132	ENSG00000175826.12:ENST00000574322.6:chr17:7247131:-	1,29	-
chr17	7247137	7247138	ENSG00000175826.12:ENST00000574322.6:chr17:7247137:-	1,29	-
chr17	7246096	7246097	ENSG00000175826.12:ENST00000574322.6:chr17:7246096:-	1,32	-
chr17	8294525	8294526	ENSG00000125434.11:ENST00000577745.2:chr17:8294525:-	1,4	-
chr17	8294694	8294695	ENSG00000125434.11:ENST00000577745.2:chr17:8294694:-	1,4	-
chr17	15629094	15629095	ENSG00000221926.13:ENST00000578237.5:chr17:15629094:-	1,5	-
chr17	32931620	32931621	ENSG00000006042.12:ENST00000579849.6:chr17:32931620:+	1,3	+
chr17	32939522	32939523	ENSG00000006042.12:ENST00000579849.6:chr17:32939522:+	1,3	+
chr17	40129531	40129532	ENSG00000188895.12:ENST00000577454.5:chr17:40129531:+	1,12	+
chr17	57988081	57988082	ENSG00000136451.9:ENST00000581208.2:chr17:57988081:-	1,36	-
chr17	57983101	57983102	ENSG00000136451.9:ENST00000581208.2:chr17:57983101:-	1,36	-
chr17	57979232	57979233	ENSG00000136451.9:ENST00000581208.2:chr17:57979232:-	1,38	-
chr17	57974587	57974588	ENSG00000136451.9:ENST00000581208.2:chr17:57974587:-	1,38	-
chr17	57974642	57974643	ENSG00000136451.9:ENST00000581208.2:chr17:57974642:-	1,38	-
chr17	57974656	57974657	ENSG00000136451.9:ENST00000581208.2:chr17:57974656:-	1,38	-
chr17	57974851	57974852	ENSG00000136451.9:ENST00000581208.2:chr17:57974851:-	1,38	-
chr17	58089179	58089180	ENSG00000264364.3:ENST00000579991.3:chr17:58089179:+	1,6	+
chr17	59131328	59131329	ENSG00000182628.13:ENST00000581068.5:chr17:59131328:-	2,9	-
chr17	59112300	59112301	ENSG00000182628.13:ENST00000581068.5:chr17:59112300:-	1,9	-
chr17	64006647	64006648	ENSG00000108622.11:ENST00000579788.6:chr17:64006647:-	1,32	-
chr17	64005220	64005221	ENSG00000108622.11:ENST00000579788.6:chr17:64005220:-	1,32	-
chr17	64005224	64005225	ENSG00000108622.11:ENST00000579788.6:chr17:64005224:-	1,32	-
chr17	64005306	64005307	ENSG00000108622.11:ENST00000579788.6:chr17:64005306:-	1,32	-
chr17	64003777	64003778	ENSG00000108622.11:ENST00000579788.6:chr17:64003777:-	1,32	-
chr17	64003883	64003884	ENSG00000108622.11:ENST00000579788.6:chr17:64003883:-	1,32	-
chr17	64002794	64002795	ENSG00000108622.11:ENST00000579788.6:chr17:64002794:-	1,32	-
chr17	64002827	64002828	ENSG00000108622.11:ENST00000579788.6:chr17:64002827:-	1,32	-
chr17	64002839	64002840	ENSG00000108622.11:ENST00000579788.6:chr17:64002839:-	1,32	-
chr17	64002860	64002861	ENSG00000108622.11:ENST00000579788.6:chr17:64002860:-	1,32	-
chr17	73031582	73031583	ENSG00000133195.11:ENST00000579732.5:chr17:73031582:-	1,2	-
chr17	72947852	72947853	ENSG00000133195.11:ENST00000579732.5:chr17:72947852:-	1,2	-
chr17	79044111	79044112	ENSG00000173918.15:ENST00000579760.6:chr17:79044111:+	1,2	+
chr17	79077479	79077480	ENSG00000167280.17:ENST00000579016.6:chr17:79077479:+	1,4	+
chr17	79079574	79079575	ENSG00000167280.17:ENST00000579016.6:chr17:79079574:+	1,5	+
chr17	79083120	79083121	ENSG00000167280.17:ENST00000579016.6:chr17:79083120:+	1,5	+
chr17	82019879	82019880	ENSG00000169689.15:ENST00000580435.5:chr17:82019879:-	1,7	-
chr18	3255784	3255785	ENSG00000101608.13:ENST00000578611.5:chr18:3255784:+	1,11	+
chr18	9775350	9775351	ENSG00000168461.13:ENST00000578921.6:chr18:9775350:+	1,32	+
chr18	9792193	9792194	ENSG00000168461.13:ENST00000578921.6:chr18:9792193:+	1,32	+
chr18	9792210	9792211	ENSG00000168461.13:ENST00000578921.6:chr18:9792210:+	1,32	+
chr18	9792216	9792217	ENSG00000168461.13:ENST00000578921.6:chr18:9792216:+	1,32	+
chr18	49491412	49491413	ENSG00000265681.8:ENST00000578532.5:chr18:49491412:-	1,2	-
chr18	49491421	49491422	ENSG00000265681.8:ENST00000578532.5:chr18:49491421:-	1,2	-
chr18	54291961	54291962	ENSG00000101751.11:ENST00000579534.6:chr18:54291961:+	1,3	+
chr18	74499986	74499987	ENSG00000133313.15:ENST00000579847.5:chr18:74499986:+	2,47	+
chr18	74501331	74501332	ENSG00000133313.15:ENST00000579847.5:chr18:74501331:+	1,47	+
chr18	74501333	74501334	ENSG00000133313.15:ENST00000579847.5:chr18:74501333:+	1,47	+
chr18	74510946	74510947	ENSG00000133313.15:ENST00000579847.5:chr18:74510946:+	1,47	+
chr18	74510991	74510992	ENSG00000133313.15:ENST00000579847.5:chr18:74510991:+	1,47	+
chr18	74511000	74511001	ENSG00000133313.15:ENST00000579847.5:chr18:74511000:+	1,47	+
chr18	74513583	74513584	ENSG00000133313.15:ENST00000579847.5:chr18:74513583:+	1,47	+
chr18	74516355	74516356	ENSG00000133313.15:ENST00000579847.5:chr18:74516355:+	1,47	+
chr18	74518569	74518570	ENSG00000133313.15:ENST00000579847.5:chr18:74518569:+	1,47	+
chr18	74519020	74519021	ENSG00000133313.15:ENST00000579847.5:chr18:74519020:+	1,47	+
chr19	5691443	5691444	ENSG00000130255.13:ENST00000577222.5:chr19:5691443:+	1,23	+
chr19	38900067	38900068	ENSG00000104825.17:ENST00000572515.5:chr19:38900067:+	2,15	+
chr19	38905036	38905037	ENSG00000104825.17:ENST00000572515.5:chr19:38905036:+	1,18	+
chr19	38905092	38905093	ENSG00000104825.17:ENST00000572515.5:chr19:38905092:+	1,18	+
chr19	38905421	38905422	ENSG00000104825.17:ENST00000572515.5:chr19:38905421:+	1,18	+
chr19	38905428	38905429	ENSG00000104825.17:ENST00000572515.5:chr19:38905428:+	1,18	+
chr19	38907612	38907613	ENSG00000104825.17:ENST00000572515.5:chr19:38907612:+	1,18	+
chr19	38907677	38907678	ENSG00000104825.17:ENST00000572515.5:chr19:38907677:+	1,18	+
chr1	119721283	119721284	ENSG00000092621.13:ENST00000641597.1:chr1:119721283:+	1,2	+
chr1	119741815	119741816	ENSG00000092621.13:ENST00000641597.1:chr1:119741815:+	1,2	+
chr1	196676041	196676042	ENSG00000000971.16:ENST00000630130.2:chr1:196676041:+	1,5	+
chr1	196677584	196677585	ENSG00000000971.16:ENST00000630130.2:chr1:196677584:+	1,5	+
chr1	196685177	196685178	ENSG00000000971.16:ENST00000630130.2:chr1:196685177:+	1,5	+
chr1	196689578	196689579	ENSG00000000971.16:ENST00000630130.2:chr1:196689578:+	1,5	+
chr1	196690191	196690192	ENSG00000000971.16:ENST00000630130.2:chr1:196690191:+	1,5	+
chr2	85847986	85847987	ENSG00000115525.18:ENST00000638572.2:chr2:85847986:-	1,3	-
chr2	85846512	85846513	ENSG00000115525.18:ENST00000638572.2:chr2:85846512:-	1,3	-
chr3	51985403	51985404	ENSG00000243989.9:ENST00000636880.1:chr3:51985403:+	1,8	+
chr3	182947302	182947303	ENSG00000043093.15:ENST00000632685.1:chr3:182947302:-	1,12	-
chr4	76174298	76174299	ENSG00000138760.11:ENST00000638295.1:chr4:76174298:-	1,1	-
chr4	127943981	127943982	ENSG00000164073.11:ENST00000641949.1:chr4:127943981:-	1,1	-
chr5	138924543	138924544	ENSG00000044115.21:ENST00000627109.2:chr5:138924543:+	1,3	+
chr5	138929279	138929280	ENSG00000044115.21:ENST00000627109.2:chr5:138929279:+	1,3	+
chr6	106555831	106555832	ENSG00000112297.18:ENST00000633556.3:chr6:106555831:+	1,4	+
chr7	95424530	95424531	ENSG00000105854.13:ENST00000633531.1:chr7:95424530:-	1,11	-
chr7	95424533	95424534	ENSG00000105854.13:ENST00000633531.1:chr7:95424533:-	1,11	-
chr7	95407011	95407012	ENSG00000105854.13:ENST00000633531.1:chr7:95407011:-	1,11	-
chr7	95405420	95405421	ENSG00000105854.13:ENST00000633531.1:chr7:95405420:-	1,11	-
chr9	125203045	125203046	ENSG00000136933.17:ENST00000628863.2:chr9:125203045:+	1,2	+
chr9	128239446	128239447	ENSG00000106976.21:ENST00000628346.2:chr9:128239446:+	1,1	+
chr9	128239765	128239766	ENSG00000106976.21:ENST00000628346.2:chr9:128239765:+	1,1	+
chr9	128242310	128242311	ENSG00000106976.21:ENST00000628346.2:chr9:128242310:+	1,1	+
chr9	128248611	128248612	ENSG00000106976.21:ENST00000628346.2:chr9:128248611:+	1,3	+
chr9	128254048	128254049	ENSG00000106976.21:ENST00000628346.2:chr9:128254048:+	1,3	+
chr9	128576923	128576924	ENSG00000197694.18:ENST00000630804.2:chr9:128576923:+	1,1	+
chr9	128579708	128579709	ENSG00000197694.18:ENST00000630804.2:chr9:128579708:+	1,1	+
chr9	128591544	128591545	ENSG00000197694.18:ENST00000630804.2:chr9:128591544:+	1,1	+
chr10	209974	209975	ENSG00000015171.20:ENST00000627286.2:chr10:209974:+	1,1	+
chr10	11314192	11314193	ENSG00000048740.18:ENST00000631460.1:chr10:11314192:+	1,3	+
chr10	11321279	11321280	ENSG00000048740.18:ENST00000631460.1:chr10:11321279:+	1,3	+
chr11	794783	794784	ENSG00000177542.11:ENST00000628067.3:chr11:794783:-	1,92	-
chr11	794882	794883	ENSG00000177542.11:ENST00000628067.3:chr11:794882:-	1,92	-
chr11	794470	794471	ENSG00000177542.11:ENST00000628067.3:chr11:794470:-	1,92	-
chr11	793560	793561	ENSG00000177542.11:ENST00000628067.3:chr11:793560:-	1,92	-
chr11	793600	793601	ENSG00000177542.11:ENST00000628067.3:chr11:793600:-	1,92	-
chr11	792916	792917	ENSG00000177542.11:ENST00000628067.3:chr11:792916:-	1,92	-
chr11	792607	792608	ENSG00000177542.11:ENST00000628067.3:chr11:792607:-	1,92	-
chr11	792652	792653	ENSG00000177542.11:ENST00000628067.3:chr11:792652:-	1,92	-
chr11	792694	792695	ENSG00000177542.11:ENST00000628067.3:chr11:792694:-	1,92	-
chr11	792409	792410	ENSG00000177542.11:ENST00000628067.3:chr11:792409:-	1,92	-
chr11	792443	792444	ENSG00000177542.11:ENST00000628067.3:chr11:792443:-	3,92	-
chr11	792149	792150	ENSG00000177542.11:ENST00000628067.3:chr11:792149:-	1,92	-
chr11	792193	792194	ENSG00000177542.11:ENST00000628067.3:chr11:792193:-	1,92	-
chr11	791926	791927	ENSG00000177542.11:ENST00000628067.3:chr11:791926:-	2,92	-
chr11	792034	792035	ENSG00000177542.11:ENST00000628067.3:chr11:792034:-	1,92	-
chr11	1761353	1761354	ENSG00000250644.3:ENST00000636615.1:chr11:1761353:-	1,33	-
chr11	1747690	1747691	ENSG00000250644.3:ENST00000636615.1:chr11:1747690:-	1,35	-
chr11	1747708	1747709	ENSG00000250644.3:ENST00000636615.1:chr11:1747708:-	1,35	-
chr11	1747763	1747764	ENSG00000250644.3:ENST00000636615.1:chr11:1747763:-	1,35	-
chr11	1747765	1747766	ENSG00000250644.3:ENST00000636615.1:chr11:1747765:-	1,35	-
chr11	1747822	1747823	ENSG00000250644.3:ENST00000636615.1:chr11:1747822:-	1,35	-
chr11	1747922	1747923	ENSG00000250644.3:ENST00000636615.1:chr11:1747922:-	1,35	-
chr11	1748016	1748017	ENSG00000250644.3:ENST00000636615.1:chr11:1748016:-	1,35	-
chr11	1748032	1748033	ENSG00000250644.3:ENST00000636615.1:chr11:1748032:-	2,35	-
chr11	1748062	1748063	ENSG00000250644.3:ENST00000636615.1:chr11:1748062:-	1,35	-
chr11	1748066	1748067	ENSG00000250644.3:ENST00000636615.1:chr11:1748066:-	2,35	-
chr11	1735289	1735290	ENSG00000250644.3:ENST00000636615.1:chr11:1735289:-	1,35	-
chr11	1735295	1735296	ENSG00000250644.3:ENST00000636615.1:chr11:1735295:-	1,35	-
chr11	1735297	1735298	ENSG00000250644.3:ENST00000636615.1:chr11:1735297:-	1,35	-
chr11	1735309	1735310	ENSG00000250644.3:ENST00000636615.1:chr11:1735309:-	1,35	-
chr11	1735354	1735355	ENSG00000250644.3:ENST00000636615.1:chr11:1735354:-	1,35	-
chr11	1735373	1735374	ENSG00000250644.3:ENST00000636615.1:chr11:1735373:-	1,35	-
chr11	1735402	1735403	ENSG00000250644.3:ENST00000636615.1:chr11:1735402:-	1,35	-
chr11	31509871	31509872	ENSG00000109911.19:ENST00000640961.2:chr11:31509871:+	1,38	+
chr11	31509906	31509907	ENSG00000109911.19:ENST00000640961.2:chr11:31509906:+	1,38	+
chr11	31509977	31509978	ENSG00000109911.19:ENST00000640961.2:chr11:31509977:+	1,38	+
chr11	31520081	31520082	ENSG00000109911.19:ENST00000640961.2:chr11:31520081:+	1,39	+
chr11	31603833	31603834	ENSG00000109911.19:ENST00000640961.2:chr11:31603833:+	1,39	+
chr11	31632222	31632223	ENSG00000109911.19:ENST00000640961.2:chr11:31632222:+	1,39	+
chr11	31632312	31632313	ENSG00000109911.19:ENST00000640961.2:chr11:31632312:+	1,39	+
chr11	31632348	31632349	ENSG00000109911.19:ENST00000640961.2:chr11:31632348:+	1,39	+
chr11	31647774	31647775	ENSG00000109911.19:ENST00000640961.2:chr11:31647774:+	1,39	+
chr11	31650140	31650141	ENSG00000109911.19:ENST00000640961.2:chr11:31650140:+	1,39	+
chr12	8090254	8090255	ENSG00000089818.18:ENST00000639955.1:chr12:8090254:+	1,16	+
chr12	8092760	8092761	ENSG00000089818.18:ENST00000639955.1:chr12:8092760:+	2,16	+
chr12	8095623	8095624	ENSG00000089818.18:ENST00000639955.1:chr12:8095623:+	1,16	+
chr12	8095639	8095640	ENSG00000089818.18:ENST00000639955.1:chr12:8095639:+	1,16	+
chr12	49273248	49273249	ENSG00000167553.16:ENST00000639419.1:chr12:49273248:+	1,12	+
chr13	31148439	31148440	ENSG00000120694.20:ENST00000630972.2:chr13:31148439:-	1,10	-
chr13	31148042	31148043	ENSG00000120694.20:ENST00000630972.2:chr13:31148042:-	1,10	-
chr13	31137376	31137377	ENSG00000120694.20:ENST00000630972.2:chr13:31137376:-	1,5	-
chr13	98902455	98902456	ENSG00000088387.20:ENST00000627024.2:chr13:98902455:-	1,1	-
chr13	98863426	98863427	ENSG00000088387.20:ENST00000627024.2:chr13:98863426:-	1,1	-
chr17	46935142	46935143	ENSG00000108433.17:ENST00000640621.1:chr17:46935142:+	1,16	+
chr17	47941700	47941701	ENSG00000108439.11:ENST00000642017.2:chr17:47941700:+	1,16	+
chr17	47941710	47941711	ENSG00000108439.11:ENST00000642017.2:chr17:47941710:+	1,18	+
chr17	47943323	47943324	ENSG00000108439.11:ENST00000642017.2:chr17:47943323:+	1,18	+
chr17	47944675	47944676	ENSG00000108439.11:ENST00000642017.2:chr17:47944675:+	1,18	+
chr17	47945919	47945920	ENSG00000108439.11:ENST00000642017.2:chr17:47945919:+	1,18	+
chr17	47946679	47946680	ENSG00000108439.11:ENST00000642017.2:chr17:47946679:+	1,18	+
chr20	3230624	3230625	ENSG00000088836.14:ENST00000642402.1:chr20:3230624:-	1,19	-
chr20	3229664	3229665	ENSG00000088836.14:ENST00000642402.1:chr20:3229664:-	1,19	-
chr20	3228577	3228578	ENSG00000088836.14:ENST00000642402.1:chr20:3228577:-	1,19	-
chr20	45424277	45424278	ENSG00000124155.18:ENST00000639499.1:chr20:45424277:+	1,2	+
chr22	42692917	42692918	ENSG00000128274.17:ENST00000642412.2:chr22:42692917:-	1,51	-
chr22	42692965	42692966	ENSG00000128274.17:ENST00000642412.2:chr22:42692965:-	1,51	-
chr22	42693050	42693051	ENSG00000128274.17:ENST00000642412.2:chr22:42693050:-	1,51	-
chr22	42693700	42693701	ENSG00000128274.17:ENST00000642412.2:chr22:42693700:-	2,51	-
chr1	65148520	65148521	ENSG00000162433.15:ENST00000545314.5:chr1:65148520:+	1,28	+
chr1	65190747	65190748	ENSG00000162433.15:ENST00000545314.5:chr1:65190747:+	1,28	+
chr1	65224867	65224868	ENSG00000162433.15:ENST00000545314.5:chr1:65224867:+	1,28	+
chr1	65226094	65226095	ENSG00000162433.15:ENST00000545314.5:chr1:65226094:+	1,28	+
chr3	62331348	62331349	ENSG00000114405.11:ENST00000542214.2:chr3:62331348:+	1,6	+
chr3	62333262	62333263	ENSG00000114405.11:ENST00000542214.2:chr3:62333262:+	2,6	+
chr5	136160985	136160986	ENSG00000113658.18:ENST00000545279.6:chr5:136160985:+	1,4	+
chr8	30069643	30069644	ENSG00000133872.14:ENST00000545648.2:chr8:30069643:-	1,22	-
chr8	30069734	30069735	ENSG00000133872.14:ENST00000545648.2:chr8:30069734:-	1,22	-
chr8	30066824	30066825	ENSG00000133872.14:ENST00000545648.2:chr8:30066824:-	1,22	-
chr9	127715608	127715609	ENSG00000187024.15:ENST00000543175.5:chr9:127715608:-	1,17	-
chr9	127715034	127715035	ENSG00000187024.15:ENST00000543175.5:chr9:127715034:-	1,17	-
chr9	127715152	127715153	ENSG00000187024.15:ENST00000543175.5:chr9:127715152:-	1,17	-
chr9	133367264	133367265	ENSG00000148248.14:ENST00000545297.5:chr9:133367264:-	1,47	-
chr9	133367283	133367284	ENSG00000148248.14:ENST00000545297.5:chr9:133367283:-	1,46	-
chr10	17229426	17229427	ENSG00000026025.16:ENST00000544301.7:chr10:17229426:+	2773	+
chr10	17229429	17229430	ENSG00000026025.16:ENST00000544301.7:chr10:17229429:+	1774	+
chr10	17229435	17229436	ENSG00000026025.16:ENST00000544301.7:chr10:17229435:+	1774	+
chr10	17229444	17229445	ENSG00000026025.16:ENST00000544301.7:chr10:17229444:+	1774	+
chr10	17229447	17229448	ENSG00000026025.16:ENST00000544301.7:chr10:17229447:+	1773	+
chr10	17229448	17229449	ENSG00000026025.16:ENST00000544301.7:chr10:17229448:+	1773	+
chr10	17229450	17229451	ENSG00000026025.16:ENST00000544301.7:chr10:17229450:+	2773	+
chr10	17229457	17229458	ENSG00000026025.16:ENST00000544301.7:chr10:17229457:+	1774	+
chr10	17229481	17229482	ENSG00000026025.16:ENST00000544301.7:chr10:17229481:+	3774	+
chr10	17229483	17229484	ENSG00000026025.16:ENST00000544301.7:chr10:17229483:+	2774	+
chr10	17229511	17229512	ENSG00000026025.16:ENST00000544301.7:chr10:17229511:+	3774	+
chr10	17229571	17229572	ENSG00000026025.16:ENST00000544301.7:chr10:17229571:+	1774	+
chr10	17229585	17229586	ENSG00000026025.16:ENST00000544301.7:chr10:17229585:+	3774	+
chr10	17229618	17229619	ENSG00000026025.16:ENST00000544301.7:chr10:17229618:+	1774	+
chr10	17229640	17229641	ENSG00000026025.16:ENST00000544301.7:chr10:17229640:+	1774	+
chr10	17229700	17229701	ENSG00000026025.16:ENST00000544301.7:chr10:17229700:+	4774	+
chr10	17229717	17229718	ENSG00000026025.16:ENST00000544301.7:chr10:17229717:+	1773	+
chr10	17229719	17229720	ENSG00000026025.16:ENST00000544301.7:chr10:17229719:+	1774	+
chr10	17229749	17229750	ENSG00000026025.16:ENST00000544301.7:chr10:17229749:+	1774	+
chr10	17229765	17229766	ENSG00000026025.16:ENST00000544301.7:chr10:17229765:+	1774	+
chr10	17229790	17229791	ENSG00000026025.16:ENST00000544301.7:chr10:17229790:+	1773	+
chr10	17229841	17229842	ENSG00000026025.16:ENST00000544301.7:chr10:17229841:+	1774	+
chr10	17229890	17229891	ENSG00000026025.16:ENST00000544301.7:chr10:17229890:+	1774	+
chr10	17229911	17229912	ENSG00000026025.16:ENST00000544301.7:chr10:17229911:+	1774	+
chr10	17229931	17229932	ENSG00000026025.16:ENST00000544301.7:chr10:17229931:+	1774	+
chr10	17229952	17229953	ENSG00000026025.16:ENST00000544301.7:chr10:17229952:+	2773	+
chr10	17233627	17233628	ENSG00000026025.16:ENST00000544301.7:chr10:17233627:+	1774	+
chr10	17233657	17233658	ENSG00000026025.16:ENST00000544301.7:chr10:17233657:+	1774	+
chr10	17233672	17233673	ENSG00000026025.16:ENST00000544301.7:chr10:17233672:+	1773	+
chr10	17233790	17233791	ENSG00000026025.16:ENST00000544301.7:chr10:17233790:+	1774	+
chr10	17233796	17233797	ENSG00000026025.16:ENST00000544301.7:chr10:17233796:+	1774	+
chr10	17233810	17233811	ENSG00000026025.16:ENST00000544301.7:chr10:17233810:+	1773	+
chr10	17233830	17233831	ENSG00000026025.16:ENST00000544301.7:chr10:17233830:+	2774	+
chr10	17233851	17233852	ENSG00000026025.16:ENST00000544301.7:chr10:17233851:+	1771	+
chr10	17233865	17233866	ENSG00000026025.16:ENST00000544301.7:chr10:17233865:+	3774	+
chr10	17233897	17233898	ENSG00000026025.16:ENST00000544301.7:chr10:17233897:+	2773	+
chr10	17233908	17233909	ENSG00000026025.16:ENST00000544301.7:chr10:17233908:+	1774	+
chr10	17234700	17234701	ENSG00000026025.16:ENST00000544301.7:chr10:17234700:+	2774	+
chr10	17234705	17234706	ENSG00000026025.16:ENST00000544301.7:chr10:17234705:+	2774	+
chr10	17234714	17234715	ENSG00000026025.16:ENST00000544301.7:chr10:17234714:+	1774	+
chr10	17234724	17234725	ENSG00000026025.16:ENST00000544301.7:chr10:17234724:+	4774	+
chr10	17234739	17234740	ENSG00000026025.16:ENST00000544301.7:chr10:17234739:+	2773	+
chr10	17234756	17234757	ENSG00000026025.16:ENST00000544301.7:chr10:17234756:+	2773	+
chr10	17234783	17234784	ENSG00000026025.16:ENST00000544301.7:chr10:17234783:+	3773	+
chr10	17234789	17234790	ENSG00000026025.16:ENST00000544301.7:chr10:17234789:+	3773	+
chr10	17234806	17234807	ENSG00000026025.16:ENST00000544301.7:chr10:17234806:+	1774	+
chr10	17235192	17235193	ENSG00000026025.16:ENST00000544301.7:chr10:17235192:+	1774	+
chr10	17235226	17235227	ENSG00000026025.16:ENST00000544301.7:chr10:17235226:+	1774	+
chr10	17235255	17235256	ENSG00000026025.16:ENST00000544301.7:chr10:17235255:+	1774	+
chr10	17235267	17235268	ENSG00000026025.16:ENST00000544301.7:chr10:17235267:+	1774	+
chr10	17235289	17235290	ENSG00000026025.16:ENST00000544301.7:chr10:17235289:+	3774	+
chr10	17235294	17235295	ENSG00000026025.16:ENST00000544301.7:chr10:17235294:+	1774	+
chr10	17235308	17235309	ENSG00000026025.16:ENST00000544301.7:chr10:17235308:+	3772	+
chr10	17235334	17235335	ENSG00000026025.16:ENST00000544301.7:chr10:17235334:+	1772	+
chr10	17235356	17235357	ENSG00000026025.16:ENST00000544301.7:chr10:17235356:+	1774	+
chr10	17235366	17235367	ENSG00000026025.16:ENST00000544301.7:chr10:17235366:+	1774	+
chr10	17235386	17235387	ENSG00000026025.16:ENST00000544301.7:chr10:17235386:+	1774	+
chr10	17236314	17236315	ENSG00000026025.16:ENST00000544301.7:chr10:17236314:+	1774	+
chr10	17236346	17236347	ENSG00000026025.16:ENST00000544301.7:chr10:17236346:+	3774	+
chr10	17237234	17237235	ENSG00000026025.16:ENST00000544301.7:chr10:17237234:+	1774	+
chr10	68742514	68742515	ENSG00000060339.14:ENST00000543719.5:chr10:68742514:+	1,2	+
chr12	28306916	28306917	ENSG00000123106.10:ENST00000545336.5:chr12:28306916:+	1,2	+
chr12	31096659	31096660	ENSG00000013573.17:ENST00000545668.5:chr12:31096659:+	1,1	+
chr12	32701537	32701538	ENSG00000087470.19:ENST00000547312.5:chr12:32701537:+	1,5	+
chr12	32722559	32722560	ENSG00000087470.19:ENST00000547312.5:chr12:32722559:+	1,6	+
chr12	32722626	32722627	ENSG00000087470.19:ENST00000547312.5:chr12:32722626:+	1,6	+
chr12	32733794	32733795	ENSG00000087470.19:ENST00000547312.5:chr12:32733794:+	1,6	+
chr12	32743396	32743397	ENSG00000087470.19:ENST00000547312.5:chr12:32743396:+	1,6	+
chr12	39340246	39340247	ENSG00000139116.19:ENST00000544797.6:chr12:39340246:-	1,1	-
chr12	39330857	39330858	ENSG00000139116.19:ENST00000544797.6:chr12:39330857:-	1,1	-
chr12	49323708	49323709	ENSG00000135451.13:ENST00000550709.5:chr12:49323708:+	1,1	+
chr12	53501457	53501458	ENSG00000139546.11:ENST00000550147.5:chr12:53501457:+	1,15	+
chr12	53723694	53723695	ENSG00000012822.16:ENST00000550804.6:chr12:53723694:-	1,23	-
chr12	53722041	53722042	ENSG00000012822.16:ENST00000550804.6:chr12:53722041:-	1,23	-
chr12	53719757	53719758	ENSG00000012822.16:ENST00000550804.6:chr12:53719757:-	1,24	-
chr12	53715251	53715252	ENSG00000012822.16:ENST00000550804.6:chr12:53715251:-	1,24	-
chr12	53713853	53713854	ENSG00000012822.16:ENST00000550804.6:chr12:53713853:-	1,24	-
chr12	53713139	53713140	ENSG00000012822.16:ENST00000550804.6:chr12:53713139:-	1,24	-
chr12	53712015	53712016	ENSG00000012822.16:ENST00000550804.6:chr12:53712015:-	1,24	-
chr12	54345491	54345492	ENSG00000111481.10:ENST00000550171.5:chr12:54345491:+	1,1	+
chr12	55727234	55727235	ENSG00000135404.12:ENST00000552692.5:chr12:55727234:-	1,10	-
chr12	56182028	56182029	ENSG00000139613.12:ENST00000550164.6:chr12:56182028:-	1,3	-
chr12	56164707	56164708	ENSG00000139613.12:ENST00000550164.6:chr12:56164707:-	1,5	-
chr12	56433774	56433775	ENSG00000111602.12:ENST00000553532.6:chr12:56433774:-	1,50	-
chr12	56433831	56433832	ENSG00000111602.12:ENST00000553532.6:chr12:56433831:-	1,50	-
chr12	56433543	56433544	ENSG00000111602.12:ENST00000553532.6:chr12:56433543:-	1,50	-
chr12	56433634	56433635	ENSG00000111602.12:ENST00000553532.6:chr12:56433634:-	1,50	-
chr12	56433084	56433085	ENSG00000111602.12:ENST00000553532.6:chr12:56433084:-	1,52	-
chr12	56433100	56433101	ENSG00000111602.12:ENST00000553532.6:chr12:56433100:-	2,52	-
chr12	56432406	56432407	ENSG00000111602.12:ENST00000553532.6:chr12:56432406:-	1,52	-
chr12	56430895	56430896	ENSG00000111602.12:ENST00000553532.6:chr12:56430895:-	1,52	-
chr12	56430937	56430938	ENSG00000111602.12:ENST00000553532.6:chr12:56430937:-	1,52	-
chr12	56430158	56430159	ENSG00000111602.12:ENST00000553532.6:chr12:56430158:-	1,52	-
chr12	56430199	56430200	ENSG00000111602.12:ENST00000553532.6:chr12:56430199:-	1,51	-
chr12	56430204	56430205	ENSG00000111602.12:ENST00000553532.6:chr12:56430204:-	1,52	-
chr12	56428971	56428972	ENSG00000111602.12:ENST00000553532.6:chr12:56428971:-	1,52	-
chr12	56429034	56429035	ENSG00000111602.12:ENST00000553532.6:chr12:56429034:-	1,52	-
chr12	56428247	56428248	ENSG00000111602.12:ENST00000553532.6:chr12:56428247:-	1,52	-
chr12	56423704	56423705	ENSG00000111602.12:ENST00000553532.6:chr12:56423704:-	1,16	-
chr12	56423434	56423435	ENSG00000111602.12:ENST00000553532.6:chr12:56423434:-	1,16	-
chr12	56422848	56422849	ENSG00000111602.12:ENST00000553532.6:chr12:56422848:-	1,16	-
chr12	56421906	56421907	ENSG00000111602.12:ENST00000553532.6:chr12:56421906:-	1,16	-
chr12	56421789	56421790	ENSG00000111602.12:ENST00000553532.6:chr12:56421789:-	1,16	-
chr12	56418350	56418351	ENSG00000111602.12:ENST00000553532.6:chr12:56418350:-	1,16	-
chr12	93469325	93469326	ENSG00000198015.14:ENST00000549982.6:chr12:93469325:+	1,44	+
chr12	93476983	93476984	ENSG00000198015.14:ENST00000549982.6:chr12:93476983:+	1,44	+
chr12	93476986	93476987	ENSG00000198015.14:ENST00000549982.6:chr12:93476986:+	1,44	+
chr12	93476997	93476998	ENSG00000198015.14:ENST00000549982.6:chr12:93476997:+	1,44	+
chr12	93477008	93477009	ENSG00000198015.14:ENST00000549982.6:chr12:93477008:+	1,44	+
chr12	93479407	93479408	ENSG00000198015.14:ENST00000549982.6:chr12:93479407:+	3,44	+
chr12	93479422	93479423	ENSG00000198015.14:ENST00000549982.6:chr12:93479422:+	1,44	+
chr12	93487582	93487583	ENSG00000198015.14:ENST00000549982.6:chr12:93487582:+	1,44	+
chr12	93487632	93487633	ENSG00000198015.14:ENST00000549982.6:chr12:93487632:+	1,44	+
chr12	93487650	93487651	ENSG00000198015.14:ENST00000549982.6:chr12:93487650:+	1,44	+
chr12	110722680	110722681	ENSG00000186298.12:ENST00000550991.5:chr12:110722680:-	1,7	-
chr12	110722119	110722120	ENSG00000186298.12:ENST00000550991.5:chr12:110722119:-	1,7	-
chr12	110722185	110722186	ENSG00000186298.12:ENST00000550991.5:chr12:110722185:-	1,7	-
chr12	113186772	113186773	ENSG00000139405.16:ENST00000548278.2:chr12:113186772:+	1138	+
chr12	113186797	113186798	ENSG00000139405.16:ENST00000548278.2:chr12:113186797:+	2138	+
chr12	113186802	113186803	ENSG00000139405.16:ENST00000548278.2:chr12:113186802:+	1138	+
chr12	113186880	113186881	ENSG00000139405.16:ENST00000548278.2:chr12:113186880:+	1138	+
chr12	113186990	113186991	ENSG00000139405.16:ENST00000548278.2:chr12:113186990:+	2138	+
chr12	113191321	113191322	ENSG00000139405.16:ENST00000548278.2:chr12:113191321:+	1138	+
chr12	113191375	113191376	ENSG00000139405.16:ENST00000548278.2:chr12:113191375:+	1138	+
chr12	113191442	113191443	ENSG00000139405.16:ENST00000548278.2:chr12:113191442:+	1137	+
chr12	113191499	113191500	ENSG00000139405.16:ENST00000548278.2:chr12:113191499:+	1138	+
chr12	113191501	113191502	ENSG00000139405.16:ENST00000548278.2:chr12:113191501:+	1138	+
chr12	113191573	113191574	ENSG00000139405.16:ENST00000548278.2:chr12:113191573:+	1138	+
chr12	113191630	113191631	ENSG00000139405.16:ENST00000548278.2:chr12:113191630:+	1138	+
chr12	113191643	113191644	ENSG00000139405.16:ENST00000548278.2:chr12:113191643:+	2138	+
chr12	113191695	113191696	ENSG00000139405.16:ENST00000548278.2:chr12:113191695:+	2138	+
chr12	113191728	113191729	ENSG00000139405.16:ENST00000548278.2:chr12:113191728:+	2138	+
chr12	113191790	113191791	ENSG00000139405.16:ENST00000548278.2:chr12:113191790:+	1138	+
chr14	20456015	20456016	ENSG00000100823.12:ENST00000555414.5:chr14:20456015:+	1,56	+
chr14	20456017	20456018	ENSG00000100823.12:ENST00000555414.5:chr14:20456017:+	1,55	+
chr14	20457091	20457092	ENSG00000100823.12:ENST00000555414.5:chr14:20457091:+	1,56	+
chr14	20457193	20457194	ENSG00000100823.12:ENST00000555414.5:chr14:20457193:+	1,56	+
chr14	20457239	20457240	ENSG00000100823.12:ENST00000555414.5:chr14:20457239:+	1,56	+
chr14	20457417	20457418	ENSG00000100823.12:ENST00000555414.5:chr14:20457417:+	1,56	+
chr14	20457421	20457422	ENSG00000100823.12:ENST00000555414.5:chr14:20457421:+	1,56	+
chr14	20457431	20457432	ENSG00000100823.12:ENST00000555414.5:chr14:20457431:+	1,56	+
chr14	59495164	59495165	ENSG00000050130.18:ENST00000554271.5:chr14:59495164:+	1,8	+
chr14	73277265	73277266	ENSG00000133961.21:ENST00000555394.5:chr14:73277265:-	1,1	-
chr14	92732699	92732700	ENSG00000100600.15:ENST00000555699.5:chr14:92732699:-	1,11	-
chr14	92717419	92717420	ENSG00000100600.15:ENST00000555699.5:chr14:92717419:-	1,11	-
chr14	92709788	92709789	ENSG00000100600.15:ENST00000555699.5:chr14:92709788:-	1,11	-
chr14	92704272	92704273	ENSG00000100600.15:ENST00000555699.5:chr14:92704272:-	1,11	-
chr14	96382333	96382334	ENSG00000100744.15:ENST00000555181.6:chr14:96382333:+	1,59	+
chr14	96385572	96385573	ENSG00000100744.15:ENST00000555181.6:chr14:96385572:+	1,59	+
chr14	96385605	96385606	ENSG00000100744.15:ENST00000555181.6:chr14:96385605:+	1,59	+
chr14	96385635	96385636	ENSG00000100744.15:ENST00000555181.6:chr14:96385635:+	1,59	+
chr14	96385651	96385652	ENSG00000100744.15:ENST00000555181.6:chr14:96385651:+	1,59	+
chr16	768533	768534	ENSG00000102854.16:ENST00000545450.7:chr16:768533:+	1,5	+
chr16	1959716	1959717	ENSG00000140990.15:ENST00000543683.6:chr16:1959716:+	1,52	+
chr16	1959731	1959732	ENSG00000140990.15:ENST00000543683.6:chr16:1959731:+	1,52	+
chr16	1959742	1959743	ENSG00000140990.15:ENST00000543683.6:chr16:1959742:+	1,52	+
chr16	1961189	1961190	ENSG00000140990.15:ENST00000543683.6:chr16:1961189:+	1,52	+
chr16	1961207	1961208	ENSG00000140990.15:ENST00000543683.6:chr16:1961207:+	1,52	+
chr16	1961222	1961223	ENSG00000140990.15:ENST00000543683.6:chr16:1961222:+	1,52	+
chr16	1961225	1961226	ENSG00000140990.15:ENST00000543683.6:chr16:1961225:+	1,52	+
chr16	1961249	1961250	ENSG00000140990.15:ENST00000543683.6:chr16:1961249:+	1,52	+
chr16	1961568	1961569	ENSG00000140990.15:ENST00000543683.6:chr16:1961568:+	1,52	+
chr16	1961666	1961667	ENSG00000140990.15:ENST00000543683.6:chr16:1961666:+	1,53	+
chr16	1961705	1961706	ENSG00000140990.15:ENST00000543683.6:chr16:1961705:+	1,53	+
chr16	31117841	31117842	ENSG00000103510.20:ENST00000543774.6:chr16:31117841:+	1,15	+
chr16	31120474	31120475	ENSG00000103510.20:ENST00000543774.6:chr16:31120474:+	1,15	+
chr16	31130895	31130896	ENSG00000103510.20:ENST00000543774.6:chr16:31130895:+	1,15	+
chr16	31130897	31130898	ENSG00000103510.20:ENST00000543774.6:chr16:31130897:+	1,15	+
chr19	34172731	34172732	ENSG00000257103.9:ENST00000544216.8:chr19:34172731:+	1,39	+
chr19	34194499	34194500	ENSG00000257103.9:ENST00000544216.8:chr19:34194499:+	1,39	+
chr19	34194612	34194613	ENSG00000257103.9:ENST00000544216.8:chr19:34194612:+	1,39	+
chr19	34208937	34208938	ENSG00000257103.9:ENST00000544216.8:chr19:34208937:+	1,39	+
chr19	34215186	34215187	ENSG00000257103.9:ENST00000544216.8:chr19:34215186:+	1,39	+
chr19	34219461	34219462	ENSG00000257103.9:ENST00000544216.8:chr19:34219461:+	1,39	+
chr19	34219837	34219838	ENSG00000257103.9:ENST00000544216.8:chr19:34219837:+	1,32	+
chr22	40770923	40770924	ENSG00000100372.15:ENST00000544408.5:chr22:40770923:-	1,8	-
chrX	19349976	19349977	ENSG00000131828.14:ENST00000545074.5:chrX:19349976:+	1,2	+
chrX	38161020	38161021	ENSG00000101955.15:ENST00000544439.5:chrX:38161020:-	1,2	-
chr1	1013996	1013997	ENSG00000187608.10:ENST00000649529.1:chr1:1013996:+	3260	+
chr1	1014018	1014019	ENSG00000187608.10:ENST00000649529.1:chr1:1014018:+	1260	+
chr1	1014044	1014045	ENSG00000187608.10:ENST00000649529.1:chr1:1014044:+	1260	+
chr1	1014094	1014095	ENSG00000187608.10:ENST00000649529.1:chr1:1014094:+	1260	+
chr1	1014096	1014097	ENSG00000187608.10:ENST00000649529.1:chr1:1014096:+	1260	+
chr1	1014112	1014113	ENSG00000187608.10:ENST00000649529.1:chr1:1014112:+	1260	+
chr1	1014123	1014124	ENSG00000187608.10:ENST00000649529.1:chr1:1014123:+	2260	+
chr1	1014153	1014154	ENSG00000187608.10:ENST00000649529.1:chr1:1014153:+	1260	+
chr1	1014207	1014208	ENSG00000187608.10:ENST00000649529.1:chr1:1014207:+	1260	+
chr1	1014220	1014221	ENSG00000187608.10:ENST00000649529.1:chr1:1014220:+	2259	+
chr1	1014221	1014222	ENSG00000187608.10:ENST00000649529.1:chr1:1014221:+	1260	+
chr1	1014223	1014224	ENSG00000187608.10:ENST00000649529.1:chr1:1014223:+	1260	+
chr1	1014246	1014247	ENSG00000187608.10:ENST00000649529.1:chr1:1014246:+	2260	+
chr1	1014267	1014268	ENSG00000187608.10:ENST00000649529.1:chr1:1014267:+	5260	+
chr1	1014274	1014275	ENSG00000187608.10:ENST00000649529.1:chr1:1014274:+	2260	+
chr1	1014287	1014288	ENSG00000187608.10:ENST00000649529.1:chr1:1014287:+	1260	+
chr1	1014304	1014305	ENSG00000187608.10:ENST00000649529.1:chr1:1014304:+	1260	+
chr1	1014339	1014340	ENSG00000187608.10:ENST00000649529.1:chr1:1014339:+	7260	+
chr1	1014388	1014389	ENSG00000187608.10:ENST00000649529.1:chr1:1014388:+	1260	+
chr1	1014399	1014400	ENSG00000187608.10:ENST00000649529.1:chr1:1014399:+	3260	+
chr1	1014405	1014406	ENSG00000187608.10:ENST00000649529.1:chr1:1014405:+	1260	+
chr1	1014469	1014470	ENSG00000187608.10:ENST00000649529.1:chr1:1014469:+	2260	+
chr1	36282605	36282606	ENSG00000054118.15:ENST00000648638.1:chr1:36282605:+	1,8	+
chr1	36296701	36296702	ENSG00000054118.15:ENST00000648638.1:chr1:36296701:+	1,3	+
chr1	36296710	36296711	ENSG00000054118.15:ENST00000648638.1:chr1:36296710:+	1,3	+
chr1	36300956	36300957	ENSG00000054118.15:ENST00000648638.1:chr1:36300956:+	1,3	+
chr1	45013011	45013012	ENSG00000126088.14:ENST00000651476.1:chr1:45013011:+	1,83	+
chr1	45013174	45013175	ENSG00000126088.14:ENST00000651476.1:chr1:45013174:+	2,83	+
chr1	45013300	45013301	ENSG00000126088.14:ENST00000651476.1:chr1:45013300:+	2,83	+
chr1	45013640	45013641	ENSG00000126088.14:ENST00000651476.1:chr1:45013640:+	1,83	+
chr1	45013680	45013681	ENSG00000126088.14:ENST00000651476.1:chr1:45013680:+	1,83	+
chr1	45014488	45014489	ENSG00000126088.14:ENST00000651476.1:chr1:45014488:+	1,83	+
chr1	45014956	45014957	ENSG00000126088.14:ENST00000651476.1:chr1:45014956:+	1,83	+
chr1	85270709	85270710	ENSG00000142867.14:ENST00000648566.1:chr1:85270709:-	1,24	-
chr1	85267939	85267940	ENSG00000142867.14:ENST00000648566.1:chr1:85267939:-	1,24	-
chr3	9890729	9890730	ENSG00000171135.15:ENST00000647897.1:chr3:9890729:+	1140	+
chr3	9890756	9890757	ENSG00000171135.15:ENST00000647897.1:chr3:9890756:+	1140	+
chr3	9890760	9890761	ENSG00000171135.15:ENST00000647897.1:chr3:9890760:+	1140	+
chr3	9890778	9890779	ENSG00000171135.15:ENST00000647897.1:chr3:9890778:+	1140	+
chr3	9892947	9892948	ENSG00000171135.15:ENST00000647897.1:chr3:9892947:+	1142	+
chr3	9892999	9893000	ENSG00000171135.15:ENST00000647897.1:chr3:9892999:+	2142	+
chr3	9893015	9893016	ENSG00000171135.15:ENST00000647897.1:chr3:9893015:+	1142	+
chr3	9893017	9893018	ENSG00000171135.15:ENST00000647897.1:chr3:9893017:+	2142	+
chr3	9893082	9893083	ENSG00000171135.15:ENST00000647897.1:chr3:9893082:+	1142	+
chr3	9893092	9893093	ENSG00000171135.15:ENST00000647897.1:chr3:9893092:+	1142	+
chr3	9893130	9893131	ENSG00000171135.15:ENST00000647897.1:chr3:9893130:+	1142	+
chr3	9893229	9893230	ENSG00000171135.15:ENST00000647897.1:chr3:9893229:+	1142	+
chr3	9893239	9893240	ENSG00000171135.15:ENST00000647897.1:chr3:9893239:+	1142	+
chr3	9893319	9893320	ENSG00000171135.15:ENST00000647897.1:chr3:9893319:+	1142	+
chr3	9893354	9893355	ENSG00000171135.15:ENST00000647897.1:chr3:9893354:+	1142	+
chr3	9893356	9893357	ENSG00000171135.15:ENST00000647897.1:chr3:9893356:+	1142	+
chr3	39383757	39383758	ENSG00000144659.13:ENST00000650617.1:chr3:39383757:+	1149	+
chr3	39389497	39389498	ENSG00000144659.13:ENST00000650617.1:chr3:39389497:+	2153	+
chr3	39389560	39389561	ENSG00000144659.13:ENST00000650617.1:chr3:39389560:+	1153	+
chr3	39390450	39390451	ENSG00000144659.13:ENST00000650617.1:chr3:39390450:+	1156	+
chr3	39390477	39390478	ENSG00000144659.13:ENST00000650617.1:chr3:39390477:+	1156	+
chr3	39390502	39390503	ENSG00000144659.13:ENST00000650617.1:chr3:39390502:+	1155	+
chr3	39390503	39390504	ENSG00000144659.13:ENST00000650617.1:chr3:39390503:+	1156	+
chr3	39391487	39391488	ENSG00000144659.13:ENST00000650617.1:chr3:39391487:+	1156	+
chr3	39391508	39391509	ENSG00000144659.13:ENST00000650617.1:chr3:39391508:+	1156	+
chr3	39391518	39391519	ENSG00000144659.13:ENST00000650617.1:chr3:39391518:+	1156	+
chr3	39391561	39391562	ENSG00000144659.13:ENST00000650617.1:chr3:39391561:+	1156	+
chr3	39391588	39391589	ENSG00000144659.13:ENST00000650617.1:chr3:39391588:+	1156	+
chr3	39391946	39391947	ENSG00000144659.13:ENST00000650617.1:chr3:39391946:+	1156	+
chr3	39391954	39391955	ENSG00000144659.13:ENST00000650617.1:chr3:39391954:+	1156	+
chr3	39394410	39394411	ENSG00000144659.13:ENST00000650617.1:chr3:39394410:+	1156	+
chr3	39394439	39394440	ENSG00000144659.13:ENST00000650617.1:chr3:39394439:+	2156	+
chr3	39394446	39394447	ENSG00000144659.13:ENST00000650617.1:chr3:39394446:+	1156	+
chr3	39394511	39394512	ENSG00000144659.13:ENST00000650617.1:chr3:39394511:+	1156	+
chr3	39394531	39394532	ENSG00000144659.13:ENST00000650617.1:chr3:39394531:+	1156	+
chr3	39394564	39394565	ENSG00000144659.13:ENST00000650617.1:chr3:39394564:+	1156	+
chr3	39396399	39396400	ENSG00000144659.13:ENST00000650617.1:chr3:39396399:+	1156	+
chr3	39396406	39396407	ENSG00000144659.13:ENST00000650617.1:chr3:39396406:+	1156	+
chr3	98593301	98593302	ENSG00000080819.9:ENST00000647941.2:chr3:98593301:-	1,25	-
chr3	98591088	98591089	ENSG00000080819.9:ENST00000647941.2:chr3:98591088:-	1,31	-
chr3	98588729	98588730	ENSG00000080819.9:ENST00000647941.2:chr3:98588729:-	1,33	-
chr3	193270698	193270699	ENSG00000127252.7:ENST00000650797.1:chr3:193270698:+	1,1	+
chr4	3532232	3532233	ENSG00000163956.13:ENST00000650182.1:chr4:3532232:-	61258	-
chr4	3532247	3532248	ENSG00000163956.13:ENST00000650182.1:chr4:3532247:-	21258	-
chr4	3532249	3532250	ENSG00000163956.13:ENST00000650182.1:chr4:3532249:-	11257	-
chr4	3532263	3532264	ENSG00000163956.13:ENST00000650182.1:chr4:3532263:-	11258	-
chr4	3532278	3532279	ENSG00000163956.13:ENST00000650182.1:chr4:3532278:-	21258	-
chr4	3532281	3532282	ENSG00000163956.13:ENST00000650182.1:chr4:3532281:-	11257	-
chr4	3532291	3532292	ENSG00000163956.13:ENST00000650182.1:chr4:3532291:-	11258	-
chr4	3532305	3532306	ENSG00000163956.13:ENST00000650182.1:chr4:3532305:-	41258	-
chr4	3532313	3532314	ENSG00000163956.13:ENST00000650182.1:chr4:3532313:-	11258	-
chr4	3532316	3532317	ENSG00000163956.13:ENST00000650182.1:chr4:3532316:-	11258	-
chr4	3532322	3532323	ENSG00000163956.13:ENST00000650182.1:chr4:3532322:-	11258	-
chr4	3532338	3532339	ENSG00000163956.13:ENST00000650182.1:chr4:3532338:-	11257	-
chr4	3532343	3532344	ENSG00000163956.13:ENST00000650182.1:chr4:3532343:-	11257	-
chr4	3532345	3532346	ENSG00000163956.13:ENST00000650182.1:chr4:3532345:-	11252	-
chr4	3532349	3532350	ENSG00000163956.13:ENST00000650182.1:chr4:3532349:-	11256	-
chr4	3532351	3532352	ENSG00000163956.13:ENST00000650182.1:chr4:3532351:-	11257	-
chr4	3532363	3532364	ENSG00000163956.13:ENST00000650182.1:chr4:3532363:-	11257	-
chr4	3532372	3532373	ENSG00000163956.13:ENST00000650182.1:chr4:3532372:-	11257	-
chr4	3532375	3532376	ENSG00000163956.13:ENST00000650182.1:chr4:3532375:-	11257	-
chr4	3532381	3532382	ENSG00000163956.13:ENST00000650182.1:chr4:3532381:-	11257	-
chr4	3532384	3532385	ENSG00000163956.13:ENST00000650182.1:chr4:3532384:-	31257	-
chr4	3532389	3532390	ENSG00000163956.13:ENST00000650182.1:chr4:3532389:-	11257	-
chr4	3532394	3532395	ENSG00000163956.13:ENST00000650182.1:chr4:3532394:-	21255	-
chr4	3524916	3524917	ENSG00000163956.13:ENST00000650182.1:chr4:3524916:-	11266	-
chr4	3524979	3524980	ENSG00000163956.13:ENST00000650182.1:chr4:3524979:-	11264	-
chr4	3524982	3524983	ENSG00000163956.13:ENST00000650182.1:chr4:3524982:-	11265	-
chr4	3525013	3525014	ENSG00000163956.13:ENST00000650182.1:chr4:3525013:-	11263	-
chr4	3525015	3525016	ENSG00000163956.13:ENST00000650182.1:chr4:3525015:-	31263	-
chr4	3525018	3525019	ENSG00000163956.13:ENST00000650182.1:chr4:3525018:-	11263	-
chr4	3525041	3525042	ENSG00000163956.13:ENST00000650182.1:chr4:3525041:-	31261	-
chr4	3525044	3525045	ENSG00000163956.13:ENST00000650182.1:chr4:3525044:-	21261	-
chr4	3525047	3525048	ENSG00000163956.13:ENST00000650182.1:chr4:3525047:-	21261	-
chr4	3520076	3520077	ENSG00000163956.13:ENST00000650182.1:chr4:3520076:-	21269	-
chr4	3520082	3520083	ENSG00000163956.13:ENST00000650182.1:chr4:3520082:-	11269	-
chr4	3520128	3520129	ENSG00000163956.13:ENST00000650182.1:chr4:3520128:-	11267	-
chr4	3520131	3520132	ENSG00000163956.13:ENST00000650182.1:chr4:3520131:-	11267	-
chr4	3520155	3520156	ENSG00000163956.13:ENST00000650182.1:chr4:3520155:-	111267	-
chr4	3520191	3520192	ENSG00000163956.13:ENST00000650182.1:chr4:3520191:-	21266	-
chr4	3518880	3518881	ENSG00000163956.13:ENST00000650182.1:chr4:3518880:-	11270	-
chr4	3518885	3518886	ENSG00000163956.13:ENST00000650182.1:chr4:3518885:-	11265	-
chr4	3518886	3518887	ENSG00000163956.13:ENST00000650182.1:chr4:3518886:-	21270	-
chr4	3518897	3518898	ENSG00000163956.13:ENST00000650182.1:chr4:3518897:-	11268	-
chr4	3518901	3518902	ENSG00000163956.13:ENST00000650182.1:chr4:3518901:-	11270	-
chr4	3518912	3518913	ENSG00000163956.13:ENST00000650182.1:chr4:3518912:-	31269	-
chr4	3518927	3518928	ENSG00000163956.13:ENST00000650182.1:chr4:3518927:-	41269	-
chr4	3518948	3518949	ENSG00000163956.13:ENST00000650182.1:chr4:3518948:-	11269	-
chr4	3518957	3518958	ENSG00000163956.13:ENST00000650182.1:chr4:3518957:-	41267	-
chr4	3518967	3518968	ENSG00000163956.13:ENST00000650182.1:chr4:3518967:-	11264	-
chr4	3518983	3518984	ENSG00000163956.13:ENST00000650182.1:chr4:3518983:-	21269	-
chr4	3518043	3518044	ENSG00000163956.13:ENST00000650182.1:chr4:3518043:-	21273	-
chr4	3518049	3518050	ENSG00000163956.13:ENST00000650182.1:chr4:3518049:-	11273	-
chr4	3518082	3518083	ENSG00000163956.13:ENST00000650182.1:chr4:3518082:-	31272	-
chr4	3518099	3518100	ENSG00000163956.13:ENST00000650182.1:chr4:3518099:-	11271	-
chr4	3518102	3518103	ENSG00000163956.13:ENST00000650182.1:chr4:3518102:-	21271	-
chr4	3518127	3518128	ENSG00000163956.13:ENST00000650182.1:chr4:3518127:-	21270	-
chr4	3518135	3518136	ENSG00000163956.13:ENST00000650182.1:chr4:3518135:-	11268	-
chr4	3518154	3518155	ENSG00000163956.13:ENST00000650182.1:chr4:3518154:-	21270	-
chr4	3518159	3518160	ENSG00000163956.13:ENST00000650182.1:chr4:3518159:-	11268	-
chr4	3518164	3518165	ENSG00000163956.13:ENST00000650182.1:chr4:3518164:-	11270	-
chr4	3518175	3518176	ENSG00000163956.13:ENST00000650182.1:chr4:3518175:-	41270	-
chr4	3518186	3518187	ENSG00000163956.13:ENST00000650182.1:chr4:3518186:-	11266	-
chr4	3518187	3518188	ENSG00000163956.13:ENST00000650182.1:chr4:3518187:-	61270	-
chr4	3516118	3516119	ENSG00000163956.13:ENST00000650182.1:chr4:3516118:-	41276	-
chr4	3516129	3516130	ENSG00000163956.13:ENST00000650182.1:chr4:3516129:-	21276	-
chr4	3516193	3516194	ENSG00000163956.13:ENST00000650182.1:chr4:3516193:-	131274	-
chr4	3514762	3514763	ENSG00000163956.13:ENST00000650182.1:chr4:3514762:-	11277	-
chr4	3514783	3514784	ENSG00000163956.13:ENST00000650182.1:chr4:3514783:-	11277	-
chr4	3514799	3514800	ENSG00000163956.13:ENST00000650182.1:chr4:3514799:-	11277	-
chr4	3514816	3514817	ENSG00000163956.13:ENST00000650182.1:chr4:3514816:-	11277	-
chr4	3514849	3514850	ENSG00000163956.13:ENST00000650182.1:chr4:3514849:-	11277	-
chr4	3514858	3514859	ENSG00000163956.13:ENST00000650182.1:chr4:3514858:-	21277	-
chr4	3514870	3514871	ENSG00000163956.13:ENST00000650182.1:chr4:3514870:-	11277	-
chr4	3514915	3514916	ENSG00000163956.13:ENST00000650182.1:chr4:3514915:-	11276	-
chr4	3512987	3512988	ENSG00000163956.13:ENST00000650182.1:chr4:3512987:-	31277	-
chr4	3512992	3512993	ENSG00000163956.13:ENST00000650182.1:chr4:3512992:-	11277	-
chr4	3512998	3512999	ENSG00000163956.13:ENST00000650182.1:chr4:3512998:-	11277	-
chr4	3513000	3513001	ENSG00000163956.13:ENST00000650182.1:chr4:3513000:-	31277	-
chr4	3513010	3513011	ENSG00000163956.13:ENST00000650182.1:chr4:3513010:-	11277	-
chr4	3513015	3513016	ENSG00000163956.13:ENST00000650182.1:chr4:3513015:-	11277	-
chr5	82277720	82277721	ENSG00000186468.13:ENST00000651545.1:chr5:82277720:-	1150	-
chr5	82277722	82277723	ENSG00000186468.13:ENST00000651545.1:chr5:82277722:-	1150	-
chr5	82277739	82277740	ENSG00000186468.13:ENST00000651545.1:chr5:82277739:-	3150	-
chr5	82277755	82277756	ENSG00000186468.13:ENST00000651545.1:chr5:82277755:-	2150	-
chr5	82277804	82277805	ENSG00000186468.13:ENST00000651545.1:chr5:82277804:-	3150	-
chr5	82277808	82277809	ENSG00000186468.13:ENST00000651545.1:chr5:82277808:-	1150	-
chr5	82276406	82276407	ENSG00000186468.13:ENST00000651545.1:chr5:82276406:-	1150	-
chr5	82276418	82276419	ENSG00000186468.13:ENST00000651545.1:chr5:82276418:-	1150	-
chr5	82276426	82276427	ENSG00000186468.13:ENST00000651545.1:chr5:82276426:-	2150	-
chr5	82276437	82276438	ENSG00000186468.13:ENST00000651545.1:chr5:82276437:-	2150	-
chr5	82276439	82276440	ENSG00000186468.13:ENST00000651545.1:chr5:82276439:-	1150	-
chr5	82276466	82276467	ENSG00000186468.13:ENST00000651545.1:chr5:82276466:-	1150	-
chr5	82276194	82276195	ENSG00000186468.13:ENST00000651545.1:chr5:82276194:-	2150	-
chr5	82276239	82276240	ENSG00000186468.13:ENST00000651545.1:chr5:82276239:-	1150	-
chr6	36963346	36963347	ENSG00000164530.15:ENST00000647861.1:chr6:36963346:+	1,4	+
chr6	36963867	36963868	ENSG00000164530.15:ENST00000647861.1:chr6:36963867:+	1,4	+
chr6	69790369	69790370	ENSG00000168216.13:ENST00000649934.3:chr6:69790369:-	1,12	-
chr6	69780503	69780504	ENSG00000168216.13:ENST00000649934.3:chr6:69780503:-	1,12	-
chr6	69780551	69780552	ENSG00000168216.13:ENST00000649934.3:chr6:69780551:-	1,12	-
chr6	69752259	69752260	ENSG00000168216.13:ENST00000649934.3:chr6:69752259:-	1,12	-
chr6	69701443	69701444	ENSG00000168216.13:ENST00000649934.3:chr6:69701443:-	1,12	-
chr6	69701447	69701448	ENSG00000168216.13:ENST00000649934.3:chr6:69701447:-	1,12	-
chr6	69701450	69701451	ENSG00000168216.13:ENST00000649934.3:chr6:69701450:-	1,12	-
chr6	69700813	69700814	ENSG00000168216.13:ENST00000649934.3:chr6:69700813:-	1,12	-
chr6	69700824	69700825	ENSG00000168216.13:ENST00000649934.3:chr6:69700824:-	1,12	-
chr6	69697603	69697604	ENSG00000168216.13:ENST00000649934.3:chr6:69697603:-	1,12	-
chr6	83181841	83181842	ENSG00000013375.16:ENST00000651425.1:chr6:83181841:-	1,1	-
chr6	131808270	131808271	ENSG00000197594.14:ENST00000647893.1:chr6:131808270:+	1,5	+
chr6	131858731	131858732	ENSG00000197594.14:ENST00000647893.1:chr6:131858731:+	1,5	+
chr6	131880011	131880012	ENSG00000197594.14:ENST00000647893.1:chr6:131880011:+	1,9	+
chr6	131880027	131880028	ENSG00000197594.14:ENST00000647893.1:chr6:131880027:+	1,9	+
chr6	131882357	131882358	ENSG00000197594.14:ENST00000647893.1:chr6:131882357:+	1,9	+
chr6	131890439	131890440	ENSG00000197594.14:ENST00000647893.1:chr6:131890439:+	1,10	+
chr7	2238812	2238813	ENSG00000286192.1:ENST00000651235.1:chr7:2238812:-	1,3	-
chr7	141601247	141601248	ENSG00000006530.18:ENST00000649286.2:chr7:141601247:+	1,43	+
chr7	141601269	141601270	ENSG00000006530.18:ENST00000649286.2:chr7:141601269:+	2,43	+
chr7	141621792	141621793	ENSG00000006530.18:ENST00000649286.2:chr7:141621792:+	1,43	+
chr7	141636998	141636999	ENSG00000006530.18:ENST00000649286.2:chr7:141636998:+	1,43	+
chr7	141641293	141641294	ENSG00000006530.18:ENST00000649286.2:chr7:141641293:+	1,43	+
chr7	141641313	141641314	ENSG00000006530.18:ENST00000649286.2:chr7:141641313:+	2,43	+
chr7	141641816	141641817	ENSG00000006530.18:ENST00000649286.2:chr7:141641816:+	1,43	+
chr7	141641901	141641902	ENSG00000006530.18:ENST00000649286.2:chr7:141641901:+	1,43	+
chr7	141649285	141649286	ENSG00000006530.18:ENST00000649286.2:chr7:141649285:+	1,43	+
chr7	141652849	141652850	ENSG00000006530.18:ENST00000649286.2:chr7:141652849:+	1,43	+
chr7	141652916	141652917	ENSG00000006530.18:ENST00000649286.2:chr7:141652916:+	1,43	+
chr10	119826980	119826981	ENSG00000198825.15:ENST00000650623.2:chr10:119826980:+	1,4	+
chr11	2903402	2903403	ENSG00000110628.16:ENST00000649076.2:chr11:2903402:+	1,3	+
chr11	32928021	32928022	ENSG00000060749.16:ENST00000650167.2:chr11:32928021:+	1,7	+
chr11	77084996	77084997	ENSG00000149260.18:ENST00000648180.1:chr11:77084996:+	1,15	+
chr11	77112734	77112735	ENSG00000149260.18:ENST00000648180.1:chr11:77112734:+	1,15	+
chr11	77114242	77114243	ENSG00000149260.18:ENST00000648180.1:chr11:77114242:+	2,15	+
chr11	77114333	77114334	ENSG00000149260.18:ENST00000648180.1:chr11:77114333:+	1,15	+
chr11	77114360	77114361	ENSG00000149260.18:ENST00000648180.1:chr11:77114360:+	1,15	+
chr11	77115401	77115402	ENSG00000149260.18:ENST00000648180.1:chr11:77115401:+	2,15	+
chr11	77115450	77115451	ENSG00000149260.18:ENST00000648180.1:chr11:77115450:+	1,15	+
chr11	77115462	77115463	ENSG00000149260.18:ENST00000648180.1:chr11:77115462:+	1,15	+
chr11	77118195	77118196	ENSG00000149260.18:ENST00000648180.1:chr11:77118195:+	1,15	+
chr11	77120887	77120888	ENSG00000149260.18:ENST00000648180.1:chr11:77120887:+	1,16	+
chr11	77122649	77122650	ENSG00000149260.18:ENST00000648180.1:chr11:77122649:+	1,16	+
chr11	77122657	77122658	ENSG00000149260.18:ENST00000648180.1:chr11:77122657:+	2,16	+
chr11	77122709	77122710	ENSG00000149260.18:ENST00000648180.1:chr11:77122709:+	1,16	+
chr11	125602401	125602402	ENSG00000134910.14:ENST00000649491.1:chr11:125602401:+	1,6	+
chr11	125608254	125608255	ENSG00000134910.14:ENST00000649491.1:chr11:125608254:+	1,6	+
chr11	125608282	125608283	ENSG00000134910.14:ENST00000649491.1:chr11:125608282:+	1,6	+
chr12	7089598	7089599	ENSG00000159403.18:ENST00000647956.2:chr12:7089598:-	1,1	-
chr14	91234888	91234889	ENSG00000119714.11:ENST00000650645.1:chr14:91234888:-	1,21	-
chr15	25370763	25370764	ENSG00000114062.22:ENST00000649550.1:chr15:25370763:-	1,10	-
chr15	25356835	25356836	ENSG00000114062.22:ENST00000649550.1:chr15:25356835:-	1,10	-
chr15	25340092	25340093	ENSG00000114062.22:ENST00000649550.1:chr15:25340092:-	1,10	-
chr17	1484246	1484247	ENSG00000197879.17:ENST00000648446.1:chr17:1484246:-	1,54	-
chr17	1483613	1483614	ENSG00000197879.17:ENST00000648446.1:chr17:1483613:-	1,54	-
chr17	1482966	1482967	ENSG00000197879.17:ENST00000648446.1:chr17:1482966:-	1,54	-
chr17	1483007	1483008	ENSG00000197879.17:ENST00000648446.1:chr17:1483007:-	1,54	-
chr17	1480720	1480721	ENSG00000197879.17:ENST00000648446.1:chr17:1480720:-	1,54	-
chr17	1480737	1480738	ENSG00000197879.17:ENST00000648446.1:chr17:1480737:-	1,54	-
chr17	1480801	1480802	ENSG00000197879.17:ENST00000648446.1:chr17:1480801:-	1,54	-
chr17	1480804	1480805	ENSG00000197879.17:ENST00000648446.1:chr17:1480804:-	1,54	-
chr17	1480849	1480850	ENSG00000197879.17:ENST00000648446.1:chr17:1480849:-	1,54	-
chr17	1480583	1480584	ENSG00000197879.17:ENST00000648446.1:chr17:1480583:-	1,54	-
chr17	1479612	1479613	ENSG00000197879.17:ENST00000648446.1:chr17:1479612:-	1,54	-
chr17	1479622	1479623	ENSG00000197879.17:ENST00000648446.1:chr17:1479622:-	2,54	-
chr17	1478453	1478454	ENSG00000197879.17:ENST00000648446.1:chr17:1478453:-	1,54	-
chr17	1478455	1478456	ENSG00000197879.17:ENST00000648446.1:chr17:1478455:-	1,54	-
chr17	1478173	1478174	ENSG00000197879.17:ENST00000648446.1:chr17:1478173:-	1,54	-
chr17	1477902	1477903	ENSG00000197879.17:ENST00000648446.1:chr17:1477902:-	1,54	-
chr17	1477947	1477948	ENSG00000197879.17:ENST00000648446.1:chr17:1477947:-	1,54	-
chr17	1477514	1477515	ENSG00000197879.17:ENST00000648446.1:chr17:1477514:-	1,54	-
chr17	1474999	1475000	ENSG00000197879.17:ENST00000648446.1:chr17:1474999:-	1,54	-
chr17	1474820	1474821	ENSG00000197879.17:ENST00000648446.1:chr17:1474820:-	1,54	-
chr17	1474831	1474832	ENSG00000197879.17:ENST00000648446.1:chr17:1474831:-	1,54	-
chr17	1474835	1474836	ENSG00000197879.17:ENST00000648446.1:chr17:1474835:-	1,54	-
chr17	1472150	1472151	ENSG00000197879.17:ENST00000648446.1:chr17:1472150:-	2,54	-
chr17	1472156	1472157	ENSG00000197879.17:ENST00000648446.1:chr17:1472156:-	1,54	-
chr17	1471995	1471996	ENSG00000197879.17:ENST00000648446.1:chr17:1471995:-	1,54	-
chr17	1471259	1471260	ENSG00000197879.17:ENST00000648446.1:chr17:1471259:-	1,54	-
chr17	1471273	1471274	ENSG00000197879.17:ENST00000648446.1:chr17:1471273:-	1,54	-
chr17	1471332	1471333	ENSG00000197879.17:ENST00000648446.1:chr17:1471332:-	1,54	-
chr17	1471117	1471118	ENSG00000197879.17:ENST00000648446.1:chr17:1471117:-	1,54	-
chr17	1470443	1470444	ENSG00000197879.17:ENST00000648446.1:chr17:1470443:-	1,54	-
chr17	1470256	1470257	ENSG00000197879.17:ENST00000648446.1:chr17:1470256:-	2,54	-
chr17	1470285	1470286	ENSG00000197879.17:ENST00000648446.1:chr17:1470285:-	1,54	-
chr17	1470330	1470331	ENSG00000197879.17:ENST00000648446.1:chr17:1470330:-	1,54	-
chr17	1469563	1469564	ENSG00000197879.17:ENST00000648446.1:chr17:1469563:-	1,54	-
chr17	1468463	1468464	ENSG00000197879.17:ENST00000648446.1:chr17:1468463:-	1,54	-
chr17	1468000	1468001	ENSG00000197879.17:ENST00000648446.1:chr17:1468000:-	2,54	-
chr17	1467844	1467845	ENSG00000197879.17:ENST00000648446.1:chr17:1467844:-	1,54	-
chr17	1467851	1467852	ENSG00000197879.17:ENST00000648446.1:chr17:1467851:-	1,54	-
chr17	1467502	1467503	ENSG00000197879.17:ENST00000648446.1:chr17:1467502:-	1,54	-
chr17	1467284	1467285	ENSG00000197879.17:ENST00000648446.1:chr17:1467284:-	1,54	-
chr17	2701366	2701367	ENSG00000132361.18:ENST00000651024.2:chr17:2701366:-	1,20	-
chr17	2701386	2701387	ENSG00000132361.18:ENST00000651024.2:chr17:2701386:-	1,20	-
chr17	2701412	2701413	ENSG00000132361.18:ENST00000651024.2:chr17:2701412:-	1,20	-
chr17	2700689	2700690	ENSG00000132361.18:ENST00000651024.2:chr17:2700689:-	1,21	-
chr17	2700445	2700446	ENSG00000132361.18:ENST00000651024.2:chr17:2700445:-	1,21	-
chr17	2698003	2698004	ENSG00000132361.18:ENST00000651024.2:chr17:2698003:-	1,21	-
chr17	2695479	2695480	ENSG00000132361.18:ENST00000651024.2:chr17:2695479:-	1,21	-
chr17	2694249	2694250	ENSG00000132361.18:ENST00000651024.2:chr17:2694249:-	1,21	-
chr17	2693938	2693939	ENSG00000132361.18:ENST00000651024.2:chr17:2693938:-	1,21	-
chr17	2692798	2692799	ENSG00000132361.18:ENST00000651024.2:chr17:2692798:-	1,21	-
chr17	2692575	2692576	ENSG00000132361.18:ENST00000651024.2:chr17:2692575:-	1,21	-
chr17	2691790	2691791	ENSG00000132361.18:ENST00000651024.2:chr17:2691790:-	1,21	-
chr17	2691679	2691680	ENSG00000132361.18:ENST00000651024.2:chr17:2691679:-	1,21	-
chr17	8232416	8232417	ENSG00000178971.16:ENST00000651323.1:chr17:8232416:-	1,6	-
chr17	8229195	8229196	ENSG00000178971.16:ENST00000651323.1:chr17:8229195:-	1,8	-
chr17	75393593	75393594	ENSG00000177885.15:ENST00000648046.1:chr17:75393593:-	1,66	-
chr17	75332770	75332771	ENSG00000177885.15:ENST00000648046.1:chr17:75332770:-	1,67	-
chr17	75321746	75321747	ENSG00000177885.15:ENST00000648046.1:chr17:75321746:-	1,67	-
chr17	75320420	75320421	ENSG00000177885.15:ENST00000648046.1:chr17:75320420:-	1,67	-
chr17	75320457	75320458	ENSG00000177885.15:ENST00000648046.1:chr17:75320457:-	1,67	-
chr17	75320545	75320546	ENSG00000177885.15:ENST00000648046.1:chr17:75320545:-	1,67	-
chr17	80146793	80146794	ENSG00000141543.12:ENST00000649764.2:chr17:80146793:-	11117	-
chr17	80146799	80146800	ENSG00000141543.12:ENST00000649764.2:chr17:80146799:-	31117	-
chr17	80146802	80146803	ENSG00000141543.12:ENST00000649764.2:chr17:80146802:-	21117	-
chr17	80146816	80146817	ENSG00000141543.12:ENST00000649764.2:chr17:80146816:-	11116	-
chr17	80146841	80146842	ENSG00000141543.12:ENST00000649764.2:chr17:80146841:-	11115	-
chr17	80146845	80146846	ENSG00000141543.12:ENST00000649764.2:chr17:80146845:-	11115	-
chr17	80146851	80146852	ENSG00000141543.12:ENST00000649764.2:chr17:80146851:-	21115	-
chr17	80146877	80146878	ENSG00000141543.12:ENST00000649764.2:chr17:80146877:-	31114	-
chr17	80146912	80146913	ENSG00000141543.12:ENST00000649764.2:chr17:80146912:-	11110	-
chr17	80146923	80146924	ENSG00000141543.12:ENST00000649764.2:chr17:80146923:-	11110	-
chr17	80146928	80146929	ENSG00000141543.12:ENST00000649764.2:chr17:80146928:-	11110	-
chr17	80146932	80146933	ENSG00000141543.12:ENST00000649764.2:chr17:80146932:-	11110	-
chr17	80146944	80146945	ENSG00000141543.12:ENST00000649764.2:chr17:80146944:-	11110	-
chr17	80144176	80144177	ENSG00000141543.12:ENST00000649764.2:chr17:80144176:-	111120	-
chr17	80144194	80144195	ENSG00000141543.12:ENST00000649764.2:chr17:80144194:-	11120	-
chr17	80144206	80144207	ENSG00000141543.12:ENST00000649764.2:chr17:80144206:-	31118	-
chr17	80144214	80144215	ENSG00000141543.12:ENST00000649764.2:chr17:80144214:-	11118	-
chr17	80144228	80144229	ENSG00000141543.12:ENST00000649764.2:chr17:80144228:-	21117	-
chr17	80144231	80144232	ENSG00000141543.12:ENST00000649764.2:chr17:80144231:-	11117	-
chr17	80141799	80141800	ENSG00000141543.12:ENST00000649764.2:chr17:80141799:-	11120	-
chr17	80141806	80141807	ENSG00000141543.12:ENST00000649764.2:chr17:80141806:-	11119	-
chr17	80141808	80141809	ENSG00000141543.12:ENST00000649764.2:chr17:80141808:-	31120	-
chr17	80141814	80141815	ENSG00000141543.12:ENST00000649764.2:chr17:80141814:-	11120	-
chr17	80141817	80141818	ENSG00000141543.12:ENST00000649764.2:chr17:80141817:-	31119	-
chr17	80141818	80141819	ENSG00000141543.12:ENST00000649764.2:chr17:80141818:-	11120	-
chr17	80141833	80141834	ENSG00000141543.12:ENST00000649764.2:chr17:80141833:-	21120	-
chr17	80141835	80141836	ENSG00000141543.12:ENST00000649764.2:chr17:80141835:-	11120	-
chr17	80141839	80141840	ENSG00000141543.12:ENST00000649764.2:chr17:80141839:-	21120	-
chr17	80141843	80141844	ENSG00000141543.12:ENST00000649764.2:chr17:80141843:-	11120	-
chr17	80141845	80141846	ENSG00000141543.12:ENST00000649764.2:chr17:80141845:-	11120	-
chr17	80141346	80141347	ENSG00000141543.12:ENST00000649764.2:chr17:80141346:-	71120	-
chr17	80141357	80141358	ENSG00000141543.12:ENST00000649764.2:chr17:80141357:-	11120	-
chr17	80140021	80140022	ENSG00000141543.12:ENST00000649764.2:chr17:80140021:-	11121	-
chr17	80140024	80140025	ENSG00000141543.12:ENST00000649764.2:chr17:80140024:-	61122	-
chr17	80140043	80140044	ENSG00000141543.12:ENST00000649764.2:chr17:80140043:-	31121	-
chr17	80140062	80140063	ENSG00000141543.12:ENST00000649764.2:chr17:80140062:-	11121	-
chr17	80140081	80140082	ENSG00000141543.12:ENST00000649764.2:chr17:80140081:-	11121	-
chr17	80140125	80140126	ENSG00000141543.12:ENST00000649764.2:chr17:80140125:-	11121	-
chr17	80140127	80140128	ENSG00000141543.12:ENST00000649764.2:chr17:80140127:-	11121	-
chr17	80139730	80139731	ENSG00000141543.12:ENST00000649764.2:chr17:80139730:-	21122	-
chr17	80139021	80139022	ENSG00000141543.12:ENST00000649764.2:chr17:80139021:-	31127	-
chr17	80139031	80139032	ENSG00000141543.12:ENST00000649764.2:chr17:80139031:-	41127	-
chr17	80139034	80139035	ENSG00000141543.12:ENST00000649764.2:chr17:80139034:-	11127	-
chr17	80139036	80139037	ENSG00000141543.12:ENST00000649764.2:chr17:80139036:-	11127	-
chr17	80139037	80139038	ENSG00000141543.12:ENST00000649764.2:chr17:80139037:-	41127	-
chr17	80139043	80139044	ENSG00000141543.12:ENST00000649764.2:chr17:80139043:-	21127	-
chr17	80139047	80139048	ENSG00000141543.12:ENST00000649764.2:chr17:80139047:-	21127	-
chr17	80139058	80139059	ENSG00000141543.12:ENST00000649764.2:chr17:80139058:-	31127	-
chr17	80139062	80139063	ENSG00000141543.12:ENST00000649764.2:chr17:80139062:-	21127	-
chr17	80139081	80139082	ENSG00000141543.12:ENST00000649764.2:chr17:80139081:-	71127	-
chr17	80139089	80139090	ENSG00000141543.12:ENST00000649764.2:chr17:80139089:-	11127	-
chr17	80139100	80139101	ENSG00000141543.12:ENST00000649764.2:chr17:80139100:-	41126	-
chr17	80139113	80139114	ENSG00000141543.12:ENST00000649764.2:chr17:80139113:-	11126	-
chr17	80139133	80139134	ENSG00000141543.12:ENST00000649764.2:chr17:80139133:-	31126	-
chr17	80138156	80138157	ENSG00000141543.12:ENST00000649764.2:chr17:80138156:-	11128	-
chr17	80138165	80138166	ENSG00000141543.12:ENST00000649764.2:chr17:80138165:-	11128	-
chr17	80138177	80138178	ENSG00000141543.12:ENST00000649764.2:chr17:80138177:-	21128	-
chr17	80138181	80138182	ENSG00000141543.12:ENST00000649764.2:chr17:80138181:-	31128	-
chr17	80138185	80138186	ENSG00000141543.12:ENST00000649764.2:chr17:80138185:-	11127	-
chr17	80138187	80138188	ENSG00000141543.12:ENST00000649764.2:chr17:80138187:-	21127	-
chr17	80138189	80138190	ENSG00000141543.12:ENST00000649764.2:chr17:80138189:-	91127	-
chr17	80138197	80138198	ENSG00000141543.12:ENST00000649764.2:chr17:80138197:-	11126	-
chr17	80138251	80138252	ENSG00000141543.12:ENST00000649764.2:chr17:80138251:-	21127	-
chr17	80138266	80138267	ENSG00000141543.12:ENST00000649764.2:chr17:80138266:-	31127	-
chr17	80137394	80137395	ENSG00000141543.12:ENST00000649764.2:chr17:80137394:-	21127	-
chr17	80137399	80137400	ENSG00000141543.12:ENST00000649764.2:chr17:80137399:-	11127	-
chr17	80137415	80137416	ENSG00000141543.12:ENST00000649764.2:chr17:80137415:-	11128	-
chr17	80137422	80137423	ENSG00000141543.12:ENST00000649764.2:chr17:80137422:-	11128	-
chr17	80137434	80137435	ENSG00000141543.12:ENST00000649764.2:chr17:80137434:-	11128	-
chr17	80137438	80137439	ENSG00000141543.12:ENST00000649764.2:chr17:80137438:-	11127	-
chr17	80137451	80137452	ENSG00000141543.12:ENST00000649764.2:chr17:80137451:-	21128	-
chr17	80137462	80137463	ENSG00000141543.12:ENST00000649764.2:chr17:80137462:-	21128	-
chr17	80137465	80137466	ENSG00000141543.12:ENST00000649764.2:chr17:80137465:-	31128	-
chr17	80137487	80137488	ENSG00000141543.12:ENST00000649764.2:chr17:80137487:-	11128	-
chr17	80137495	80137496	ENSG00000141543.12:ENST00000649764.2:chr17:80137495:-	41128	-
chr17	80136265	80136266	ENSG00000141543.12:ENST00000649764.2:chr17:80136265:-	31128	-
chr17	80136271	80136272	ENSG00000141543.12:ENST00000649764.2:chr17:80136271:-	11128	-
chr17	80136278	80136279	ENSG00000141543.12:ENST00000649764.2:chr17:80136278:-	11128	-
chr17	80136285	80136286	ENSG00000141543.12:ENST00000649764.2:chr17:80136285:-	11128	-
chr17	80136310	80136311	ENSG00000141543.12:ENST00000649764.2:chr17:80136310:-	21128	-
chr17	80136317	80136318	ENSG00000141543.12:ENST00000649764.2:chr17:80136317:-	11128	-
chr17	80136032	80136033	ENSG00000141543.12:ENST00000649764.2:chr17:80136032:-	21130	-
chr17	80136042	80136043	ENSG00000141543.12:ENST00000649764.2:chr17:80136042:-	11130	-
chr17	80136046	80136047	ENSG00000141543.12:ENST00000649764.2:chr17:80136046:-	31130	-
chr17	80136061	80136062	ENSG00000141543.12:ENST00000649764.2:chr17:80136061:-	11130	-
chr17	80136064	80136065	ENSG00000141543.12:ENST00000649764.2:chr17:80136064:-	11130	-
chr17	80136067	80136068	ENSG00000141543.12:ENST00000649764.2:chr17:80136067:-	51130	-
chr17	80136114	80136115	ENSG00000141543.12:ENST00000649764.2:chr17:80136114:-	11130	-
chr17	80135497	80135498	ENSG00000141543.12:ENST00000649764.2:chr17:80135497:-	11130	-
chr18	58710064	58710065	ENSG00000172175.15:ENST00000649217.2:chr18:58710064:+	1,8	+
chr18	58723129	58723130	ENSG00000172175.15:ENST00000649217.2:chr18:58723129:+	1,8	+
chr18	58723237	58723238	ENSG00000172175.15:ENST00000649217.2:chr18:58723237:+	1,8	+
chr18	58744368	58744369	ENSG00000172175.15:ENST00000649217.2:chr18:58744368:+	1,7	+
chr18	58747552	58747553	ENSG00000172175.15:ENST00000649217.2:chr18:58747552:+	1,7	+
chr18	58747736	58747737	ENSG00000172175.15:ENST00000649217.2:chr18:58747736:+	1,7	+
chr19	4929268	4929269	ENSG00000276043.5:ENST00000650932.1:chr19:4929268:+	1,1	+
chr19	4950897	4950898	ENSG00000276043.5:ENST00000650932.1:chr19:4950897:+	1,1	+
chr19	35651311	35651312	ENSG00000126267.11:ENST00000649813.2:chr19:35651311:+	1246	+
chr19	35651317	35651318	ENSG00000126267.11:ENST00000649813.2:chr19:35651317:+	1246	+
chr19	35651329	35651330	ENSG00000126267.11:ENST00000649813.2:chr19:35651329:+	3246	+
chr19	35651344	35651345	ENSG00000126267.11:ENST00000649813.2:chr19:35651344:+	4246	+
chr19	35654574	35654575	ENSG00000126267.11:ENST00000649813.2:chr19:35654574:+	2246	+
chr19	35654577	35654578	ENSG00000126267.11:ENST00000649813.2:chr19:35654577:+	4246	+
chr19	35654584	35654585	ENSG00000126267.11:ENST00000649813.2:chr19:35654584:+	2246	+
chr19	35654646	35654647	ENSG00000126267.11:ENST00000649813.2:chr19:35654646:+	1246	+
chr19	35654663	35654664	ENSG00000126267.11:ENST00000649813.2:chr19:35654663:+	2246	+
chr19	35658595	35658596	ENSG00000126267.11:ENST00000649813.2:chr19:35658595:+	3246	+
chr19	35658611	35658612	ENSG00000126267.11:ENST00000649813.2:chr19:35658611:+	1246	+
chr19	43780746	43780747	ENSG00000104783.14:ENST00000648319.1:chr19:43780746:-	1190	-
chr19	43780821	43780822	ENSG00000104783.14:ENST00000648319.1:chr19:43780821:-	1174	-
chr19	43776578	43776579	ENSG00000104783.14:ENST00000648319.1:chr19:43776578:-	1190	-
chr19	43776600	43776601	ENSG00000104783.14:ENST00000648319.1:chr19:43776600:-	1190	-
chr19	43776624	43776625	ENSG00000104783.14:ENST00000648319.1:chr19:43776624:-	1189	-
chr19	43774221	43774222	ENSG00000104783.14:ENST00000648319.1:chr19:43774221:-	1192	-
chr19	43774239	43774240	ENSG00000104783.14:ENST00000648319.1:chr19:43774239:-	1192	-
chr19	43774252	43774253	ENSG00000104783.14:ENST00000648319.1:chr19:43774252:-	1192	-
chr19	43774271	43774272	ENSG00000104783.14:ENST00000648319.1:chr19:43774271:-	1192	-
chr19	43774321	43774322	ENSG00000104783.14:ENST00000648319.1:chr19:43774321:-	1192	-
chr19	43774328	43774329	ENSG00000104783.14:ENST00000648319.1:chr19:43774328:-	1192	-
chr19	43774337	43774338	ENSG00000104783.14:ENST00000648319.1:chr19:43774337:-	1192	-
chr19	43774341	43774342	ENSG00000104783.14:ENST00000648319.1:chr19:43774341:-	1192	-
chr19	43774344	43774345	ENSG00000104783.14:ENST00000648319.1:chr19:43774344:-	1192	-
chr19	43774346	43774347	ENSG00000104783.14:ENST00000648319.1:chr19:43774346:-	1192	-
chr19	43774349	43774350	ENSG00000104783.14:ENST00000648319.1:chr19:43774349:-	1192	-
chr19	43774370	43774371	ENSG00000104783.14:ENST00000648319.1:chr19:43774370:-	1192	-
chr19	43774390	43774391	ENSG00000104783.14:ENST00000648319.1:chr19:43774390:-	2192	-
chr19	43774394	43774395	ENSG00000104783.14:ENST00000648319.1:chr19:43774394:-	1192	-
chr19	43774555	43774556	ENSG00000104783.14:ENST00000648319.1:chr19:43774555:-	1190	-
chr19	43772078	43772079	ENSG00000104783.14:ENST00000648319.1:chr19:43772078:-	3192	-
chr19	43772099	43772100	ENSG00000104783.14:ENST00000648319.1:chr19:43772099:-	1192	-
chr19	43772109	43772110	ENSG00000104783.14:ENST00000648319.1:chr19:43772109:-	1192	-
chr19	43769751	43769752	ENSG00000104783.14:ENST00000648319.1:chr19:43769751:-	1192	-
chr19	43769815	43769816	ENSG00000104783.14:ENST00000648319.1:chr19:43769815:-	2192	-
chr19	43769817	43769818	ENSG00000104783.14:ENST00000648319.1:chr19:43769817:-	1192	-
chr19	43769823	43769824	ENSG00000104783.14:ENST00000648319.1:chr19:43769823:-	1192	-
chr19	43769460	43769461	ENSG00000104783.14:ENST00000648319.1:chr19:43769460:-	1192	-
chr19	43769504	43769505	ENSG00000104783.14:ENST00000648319.1:chr19:43769504:-	1192	-
chr19	43769508	43769509	ENSG00000104783.14:ENST00000648319.1:chr19:43769508:-	1192	-
chr19	43768966	43768967	ENSG00000104783.14:ENST00000648319.1:chr19:43768966:-	1192	-
chr19	43769009	43769010	ENSG00000104783.14:ENST00000648319.1:chr19:43769009:-	1192	-
chr19	43769028	43769029	ENSG00000104783.14:ENST00000648319.1:chr19:43769028:-	2192	-
chr19	43767553	43767554	ENSG00000104783.14:ENST00000648319.1:chr19:43767553:-	1192	-
chr19	43767562	43767563	ENSG00000104783.14:ENST00000648319.1:chr19:43767562:-	2192	-
chr19	43767591	43767592	ENSG00000104783.14:ENST00000648319.1:chr19:43767591:-	1192	-
chr19	43767635	43767636	ENSG00000104783.14:ENST00000648319.1:chr19:43767635:-	2192	-
chr19	43767673	43767674	ENSG00000104783.14:ENST00000648319.1:chr19:43767673:-	1192	-
chr19	43767686	43767687	ENSG00000104783.14:ENST00000648319.1:chr19:43767686:-	2192	-
chr19	48230792	48230793	ENSG00000105483.18:ENST00000651546.1:chr19:48230792:-	1,1	-
chr19	48218906	48218907	ENSG00000105483.18:ENST00000651546.1:chr19:48218906:-	1,1	-
chr21	45405234	45405235	ENSG00000182871.16:ENST00000651438.1:chr21:45405234:+	1,27	+
chr21	45468248	45468249	ENSG00000182871.16:ENST00000651438.1:chr21:45468248:+	1,27	+
chr21	45468341	45468342	ENSG00000182871.16:ENST00000651438.1:chr21:45468341:+	1,27	+
chr21	45468359	45468360	ENSG00000182871.16:ENST00000651438.1:chr21:45468359:+	1,27	+
chr21	45468410	45468411	ENSG00000182871.16:ENST00000651438.1:chr21:45468410:+	1,27	+
chr21	45468671	45468672	ENSG00000182871.16:ENST00000651438.1:chr21:45468671:+	2,27	+
chr21	45475533	45475534	ENSG00000182871.16:ENST00000651438.1:chr21:45475533:+	1,27	+
chr21	45476365	45476366	ENSG00000182871.16:ENST00000651438.1:chr21:45476365:+	1,27	+
chr21	45477467	45477468	ENSG00000182871.16:ENST00000651438.1:chr21:45477467:+	1,27	+
chr21	45477794	45477795	ENSG00000182871.16:ENST00000651438.1:chr21:45477794:+	1,27	+
chr21	45477908	45477909	ENSG00000182871.16:ENST00000651438.1:chr21:45477908:+	3,27	+
chr21	45479906	45479907	ENSG00000182871.16:ENST00000651438.1:chr21:45479906:+	1,27	+
chr21	45480467	45480468	ENSG00000182871.16:ENST00000651438.1:chr21:45480467:+	1,27	+
chr21	45480488	45480489	ENSG00000182871.16:ENST00000651438.1:chr21:45480488:+	1,27	+
chr21	45480720	45480721	ENSG00000182871.16:ENST00000651438.1:chr21:45480720:+	1,27	+
chr21	45480798	45480799	ENSG00000182871.16:ENST00000651438.1:chr21:45480798:+	1,27	+
chr21	45480810	45480811	ENSG00000182871.16:ENST00000651438.1:chr21:45480810:+	1,27	+
chr21	45486865	45486866	ENSG00000182871.16:ENST00000651438.1:chr21:45486865:+	1,27	+
chr21	45493185	45493186	ENSG00000182871.16:ENST00000651438.1:chr21:45493185:+	1,27	+
chr21	45494909	45494910	ENSG00000182871.16:ENST00000651438.1:chr21:45494909:+	1,27	+
chr21	45497618	45497619	ENSG00000182871.16:ENST00000651438.1:chr21:45497618:+	1,27	+
chr21	45504483	45504484	ENSG00000182871.16:ENST00000651438.1:chr21:45504483:+	1,27	+
chr21	45504486	45504487	ENSG00000182871.16:ENST00000651438.1:chr21:45504486:+	1,27	+
chr21	45505377	45505378	ENSG00000182871.16:ENST00000651438.1:chr21:45505377:+	1,27	+
chr21	45505426	45505427	ENSG00000182871.16:ENST00000651438.1:chr21:45505426:+	1,27	+
chr21	45509440	45509441	ENSG00000182871.16:ENST00000651438.1:chr21:45509440:+	1,27	+
chr21	45509525	45509526	ENSG00000182871.16:ENST00000651438.1:chr21:45509525:+	2,27	+
chr21	45509588	45509589	ENSG00000182871.16:ENST00000651438.1:chr21:45509588:+	1,27	+
chr21	45510083	45510084	ENSG00000182871.16:ENST00000651438.1:chr21:45510083:+	1,27	+
chr22	37641158	37641159	ENSG00000100092.24:ENST00000649765.2:chr22:37641158:+	1,4	+
chr22	37655645	37655646	ENSG00000100092.24:ENST00000649765.2:chr22:37655645:+	1,4	+
chrX	11762181	11762182	ENSG00000005302.19:ENST00000647857.1:chrX:11762181:+	1,3	+
chrX	77902653	77902654	ENSG00000131174.7:ENST00000650309.2:chrX:77902653:+	2,90	+
chrX	77902660	77902661	ENSG00000131174.7:ENST00000650309.2:chrX:77902660:+	1,90	+
chrX	77902686	77902687	ENSG00000131174.7:ENST00000650309.2:chrX:77902686:+	1,90	+
chrX	77902690	77902691	ENSG00000131174.7:ENST00000650309.2:chrX:77902690:+	1,90	+
chrX	77902706	77902707	ENSG00000131174.7:ENST00000650309.2:chrX:77902706:+	6,90	+
chrX	77902741	77902742	ENSG00000131174.7:ENST00000650309.2:chrX:77902741:+	1,90	+
chr1	1355453	1355454	ENSG00000162576.17:ENST00000309212.11:chr1:1355453:-	1107	-
chr1	1355474	1355475	ENSG00000162576.17:ENST00000309212.11:chr1:1355474:-	1107	-
chr1	1355555	1355556	ENSG00000162576.17:ENST00000309212.11:chr1:1355555:-	1107	-
chr1	1355618	1355619	ENSG00000162576.17:ENST00000309212.11:chr1:1355618:-	1107	-
chr1	1355640	1355641	ENSG00000162576.17:ENST00000309212.11:chr1:1355640:-	1107	-
chr1	1355295	1355296	ENSG00000162576.17:ENST00000309212.11:chr1:1355295:-	1107	-
chr1	1354745	1354746	ENSG00000162576.17:ENST00000309212.11:chr1:1354745:-	1107	-
chr1	1354769	1354770	ENSG00000162576.17:ENST00000309212.11:chr1:1354769:-	1107	-
chr1	1354796	1354797	ENSG00000162576.17:ENST00000309212.11:chr1:1354796:-	2107	-
chr1	1354868	1354869	ENSG00000162576.17:ENST00000309212.11:chr1:1354868:-	2107	-
chr1	1354955	1354956	ENSG00000162576.17:ENST00000309212.11:chr1:1354955:-	1107	-
chr1	1354979	1354980	ENSG00000162576.17:ENST00000309212.11:chr1:1354979:-	2107	-
chr1	1355048	1355049	ENSG00000162576.17:ENST00000309212.11:chr1:1355048:-	1107	-
chr1	1355049	1355050	ENSG00000162576.17:ENST00000309212.11:chr1:1355049:-	2107	-
chr1	1355093	1355094	ENSG00000162576.17:ENST00000309212.11:chr1:1355093:-	1107	-
chr1	1355126	1355127	ENSG00000162576.17:ENST00000309212.11:chr1:1355126:-	2107	-
chr1	1354392	1354393	ENSG00000162576.17:ENST00000309212.11:chr1:1354392:-	1107	-
chr1	1354444	1354445	ENSG00000162576.17:ENST00000309212.11:chr1:1354444:-	1107	-
chr1	1354500	1354501	ENSG00000162576.17:ENST00000309212.11:chr1:1354500:-	1107	-
chr1	1354507	1354508	ENSG00000162576.17:ENST00000309212.11:chr1:1354507:-	3107	-
chr1	1354214	1354215	ENSG00000162576.17:ENST00000309212.11:chr1:1354214:-	1107	-
chr1	1354219	1354220	ENSG00000162576.17:ENST00000309212.11:chr1:1354219:-	1107	-
chr1	1354221	1354222	ENSG00000162576.17:ENST00000309212.11:chr1:1354221:-	4107	-
chr1	1354032	1354033	ENSG00000162576.17:ENST00000309212.11:chr1:1354032:-	1107	-
chr1	1354051	1354052	ENSG00000162576.17:ENST00000309212.11:chr1:1354051:-	1107	-
chr1	1354093	1354094	ENSG00000162576.17:ENST00000309212.11:chr1:1354093:-	2107	-
chr1	1353884	1353885	ENSG00000162576.17:ENST00000309212.11:chr1:1353884:-	1107	-
chr1	1353888	1353889	ENSG00000162576.17:ENST00000309212.11:chr1:1353888:-	1107	-
chr1	1353914	1353915	ENSG00000162576.17:ENST00000309212.11:chr1:1353914:-	1107	-
chr1	1353923	1353924	ENSG00000162576.17:ENST00000309212.11:chr1:1353923:-	1107	-
chr1	1353612	1353613	ENSG00000162576.17:ENST00000309212.11:chr1:1353612:-	1107	-
chr1	97883336	97883337	ENSG00000188641.14:ENST00000306031.5:chr1:97883336:-	1,5	-
chr1	154974753	154974754	ENSG00000173207.13:ENST00000308987.6:chr1:154974753:+	1771	+
chr1	154974770	154974771	ENSG00000173207.13:ENST00000308987.6:chr1:154974770:+	2771	+
chr1	154977996	154977997	ENSG00000173207.13:ENST00000308987.6:chr1:154977996:+	1773	+
chr1	154978000	154978001	ENSG00000173207.13:ENST00000308987.6:chr1:154978000:+	1773	+
chr1	154978007	154978008	ENSG00000173207.13:ENST00000308987.6:chr1:154978007:+	1773	+
chr1	154978012	154978013	ENSG00000173207.13:ENST00000308987.6:chr1:154978012:+	1773	+
chr1	154978022	154978023	ENSG00000173207.13:ENST00000308987.6:chr1:154978022:+	2770	+
chr1	154978024	154978025	ENSG00000173207.13:ENST00000308987.6:chr1:154978024:+	1773	+
chr1	154978048	154978049	ENSG00000173207.13:ENST00000308987.6:chr1:154978048:+	1773	+
chr1	154978071	154978072	ENSG00000173207.13:ENST00000308987.6:chr1:154978071:+	2773	+
chr1	154978080	154978081	ENSG00000173207.13:ENST00000308987.6:chr1:154978080:+	2773	+
chr1	154978092	154978093	ENSG00000173207.13:ENST00000308987.6:chr1:154978092:+	1773	+
chr1	154978731	154978732	ENSG00000173207.13:ENST00000308987.6:chr1:154978731:+	1773	+
chr1	154978734	154978735	ENSG00000173207.13:ENST00000308987.6:chr1:154978734:+	2773	+
chr1	154978743	154978744	ENSG00000173207.13:ENST00000308987.6:chr1:154978743:+	6773	+
chr1	225777969	225777970	ENSG00000143742.14:ENST00000304786.12:chr1:225777969:+	1242	+
chr1	225777981	225777982	ENSG00000143742.14:ENST00000304786.12:chr1:225777981:+	1242	+
chr1	225777988	225777989	ENSG00000143742.14:ENST00000304786.12:chr1:225777988:+	1242	+
chr1	225778002	225778003	ENSG00000143742.14:ENST00000304786.12:chr1:225778002:+	1242	+
chr1	225783302	225783303	ENSG00000143742.14:ENST00000304786.12:chr1:225783302:+	1243	+
chr1	225789266	225789267	ENSG00000143742.14:ENST00000304786.12:chr1:225789266:+	3242	+
chr1	225789311	225789312	ENSG00000143742.14:ENST00000304786.12:chr1:225789311:+	1243	+
chr1	225789342	225789343	ENSG00000143742.14:ENST00000304786.12:chr1:225789342:+	1243	+
chr1	248855755	248855756	ENSG00000171163.16:ENST00000306601.9:chr1:248855755:-	1,27	-
chr1	248855579	248855580	ENSG00000171163.16:ENST00000306601.9:chr1:248855579:-	1,27	-
chr1	248855586	248855587	ENSG00000171163.16:ENST00000306601.9:chr1:248855586:-	1,27	-
chr1	248855632	248855633	ENSG00000171163.16:ENST00000306601.9:chr1:248855632:-	1,27	-
chr1	248850293	248850294	ENSG00000171163.16:ENST00000306601.9:chr1:248850293:-	1,27	-
chr2	23984692	23984693	ENSG00000173960.14:ENST00000309033.5:chr2:23984692:+	1,16	+
chr2	23984767	23984768	ENSG00000173960.14:ENST00000309033.5:chr2:23984767:+	1,15	+
chr2	27204843	27204844	ENSG00000138074.15:ENST00000310574.8:chr2:27204843:-	1,21	-
chr2	27204517	27204518	ENSG00000138074.15:ENST00000310574.8:chr2:27204517:-	1,21	-
chr2	27201420	27201421	ENSG00000138074.15:ENST00000310574.8:chr2:27201420:-	1,44	-
chr2	27200573	27200574	ENSG00000138074.15:ENST00000310574.8:chr2:27200573:-	1,44	-
chr2	85595800	85595801	ENSG00000168894.10:ENST00000306368.9:chr2:85595800:+	1104	+
chr2	85595818	85595819	ENSG00000168894.10:ENST00000306368.9:chr2:85595818:+	1104	+
chr2	85596575	85596576	ENSG00000168894.10:ENST00000306368.9:chr2:85596575:+	1109	+
chr2	85596601	85596602	ENSG00000168894.10:ENST00000306368.9:chr2:85596601:+	5109	+
chr2	85596614	85596615	ENSG00000168894.10:ENST00000306368.9:chr2:85596614:+	1109	+
chr2	85596625	85596626	ENSG00000168894.10:ENST00000306368.9:chr2:85596625:+	4109	+
chr2	85596866	85596867	ENSG00000168894.10:ENST00000306368.9:chr2:85596866:+	2109	+
chr2	85596869	85596870	ENSG00000168894.10:ENST00000306368.9:chr2:85596869:+	1109	+
chr2	85596909	85596910	ENSG00000168894.10:ENST00000306368.9:chr2:85596909:+	1109	+
chr2	85596913	85596914	ENSG00000168894.10:ENST00000306368.9:chr2:85596913:+	2109	+
chr2	85597110	85597111	ENSG00000168894.10:ENST00000306368.9:chr2:85597110:+	1109	+
chr2	85597147	85597148	ENSG00000168894.10:ENST00000306368.9:chr2:85597147:+	1109	+
chr2	85597150	85597151	ENSG00000168894.10:ENST00000306368.9:chr2:85597150:+	1109	+
chr2	85597453	85597454	ENSG00000168894.10:ENST00000306368.9:chr2:85597453:+	2109	+
chr2	85597467	85597468	ENSG00000168894.10:ENST00000306368.9:chr2:85597467:+	1109	+
chr2	85597482	85597483	ENSG00000168894.10:ENST00000306368.9:chr2:85597482:+	1109	+
chr2	85597499	85597500	ENSG00000168894.10:ENST00000306368.9:chr2:85597499:+	3109	+
chr2	85599105	85599106	ENSG00000168890.14:ENST00000306353.7:chr2:85599105:-	2,10	-
chr2	96817353	96817354	ENSG00000168763.16:ENST00000305510.4:chr2:96817353:+	1,13	+
chr3	23807280	23807281	ENSG00000170142.12:ENST00000306627.8:chr3:23807280:+	1145	+
chr3	23807312	23807313	ENSG00000170142.12:ENST00000306627.8:chr3:23807312:+	1144	+
chr3	23807329	23807330	ENSG00000170142.12:ENST00000306627.8:chr3:23807329:+	1145	+
chr3	23807345	23807346	ENSG00000170142.12:ENST00000306627.8:chr3:23807345:+	2147	+
chr3	23807393	23807394	ENSG00000170142.12:ENST00000306627.8:chr3:23807393:+	1147	+
chr3	23811485	23811486	ENSG00000170142.12:ENST00000306627.8:chr3:23811485:+	2148	+
chr3	23887587	23887588	ENSG00000170142.12:ENST00000306627.8:chr3:23887587:+	3148	+
chr3	23887654	23887655	ENSG00000170142.12:ENST00000306627.8:chr3:23887654:+	1148	+
chr3	23887664	23887665	ENSG00000170142.12:ENST00000306627.8:chr3:23887664:+	1148	+
chr3	23887682	23887683	ENSG00000170142.12:ENST00000306627.8:chr3:23887682:+	1148	+
chr3	23887686	23887687	ENSG00000170142.12:ENST00000306627.8:chr3:23887686:+	2148	+
chr3	23889120	23889121	ENSG00000170142.12:ENST00000306627.8:chr3:23889120:+	1148	+
chr3	23889131	23889132	ENSG00000170142.12:ENST00000306627.8:chr3:23889131:+	1148	+
chr3	23889205	23889206	ENSG00000170142.12:ENST00000306627.8:chr3:23889205:+	1148	+
chr3	23890535	23890536	ENSG00000170142.12:ENST00000306627.8:chr3:23890535:+	1148	+
chr3	23890547	23890548	ENSG00000170142.12:ENST00000306627.8:chr3:23890547:+	1148	+
chr3	23890561	23890562	ENSG00000170142.12:ENST00000306627.8:chr3:23890561:+	1148	+
chr3	23890566	23890567	ENSG00000170142.12:ENST00000306627.8:chr3:23890566:+	1148	+
chr3	49132555	49132556	ENSG00000172037.14:ENST00000305544.9:chr3:49132555:-	1,19	-
chr3	49132139	49132140	ENSG00000172037.14:ENST00000305544.9:chr3:49132139:-	1,19	-
chr3	49131564	49131565	ENSG00000172037.14:ENST00000305544.9:chr3:49131564:-	1,19	-
chr3	49131624	49131625	ENSG00000172037.14:ENST00000305544.9:chr3:49131624:-	1,19	-
chr3	49131681	49131682	ENSG00000172037.14:ENST00000305544.9:chr3:49131681:-	1,19	-
chr3	49131018	49131019	ENSG00000172037.14:ENST00000305544.9:chr3:49131018:-	1,19	-
chr3	49130251	49130252	ENSG00000172037.14:ENST00000305544.9:chr3:49130251:-	1,19	-
chr3	49129628	49129629	ENSG00000172037.14:ENST00000305544.9:chr3:49129628:-	2,19	-
chr3	49128709	49128710	ENSG00000172037.14:ENST00000305544.9:chr3:49128709:-	1,19	-
chr3	49125774	49125775	ENSG00000172037.14:ENST00000305544.9:chr3:49125774:-	1,19	-
chr3	49125346	49125347	ENSG00000172037.14:ENST00000305544.9:chr3:49125346:-	1,19	-
chr3	49125064	49125065	ENSG00000172037.14:ENST00000305544.9:chr3:49125064:-	1,18	-
chr3	49125067	49125068	ENSG00000172037.14:ENST00000305544.9:chr3:49125067:-	1,19	-
chr3	49124755	49124756	ENSG00000172037.14:ENST00000305544.9:chr3:49124755:-	1,19	-
chr3	49124543	49124544	ENSG00000172037.14:ENST00000305544.9:chr3:49124543:-	1,19	-
chr3	49123483	49123484	ENSG00000172037.14:ENST00000305544.9:chr3:49123483:-	1,19	-
chr3	49123497	49123498	ENSG00000172037.14:ENST00000305544.9:chr3:49123497:-	1,19	-
chr3	49123501	49123502	ENSG00000172037.14:ENST00000305544.9:chr3:49123501:-	1,19	-
chr3	49123143	49123144	ENSG00000172037.14:ENST00000305544.9:chr3:49123143:-	1,19	-
chr3	49123215	49123216	ENSG00000172037.14:ENST00000305544.9:chr3:49123215:-	1,19	-
chr3	49122739	49122740	ENSG00000172037.14:ENST00000305544.9:chr3:49122739:-	1,19	-
chr3	49122172	49122173	ENSG00000172037.14:ENST00000305544.9:chr3:49122172:-	1,19	-
chr3	49121495	49121496	ENSG00000172037.14:ENST00000305544.9:chr3:49121495:-	1,19	-
chr3	52199270	52199271	ENSG00000023330.15:ENST00000310271.6:chr3:52199270:+	1118	+
chr3	52199392	52199393	ENSG00000023330.15:ENST00000310271.6:chr3:52199392:+	1118	+
chr3	52199402	52199403	ENSG00000023330.15:ENST00000310271.6:chr3:52199402:+	2118	+
chr3	52199405	52199406	ENSG00000023330.15:ENST00000310271.6:chr3:52199405:+	1118	+
chr3	52199406	52199407	ENSG00000023330.15:ENST00000310271.6:chr3:52199406:+	1118	+
chr3	52202510	52202511	ENSG00000023330.15:ENST00000310271.6:chr3:52202510:+	1118	+
chr3	52202515	52202516	ENSG00000023330.15:ENST00000310271.6:chr3:52202515:+	1118	+
chr3	52202541	52202542	ENSG00000023330.15:ENST00000310271.6:chr3:52202541:+	1117	+
chr3	52202572	52202573	ENSG00000023330.15:ENST00000310271.6:chr3:52202572:+	1118	+
chr3	52202636	52202637	ENSG00000023330.15:ENST00000310271.6:chr3:52202636:+	1118	+
chr3	52202672	52202673	ENSG00000023330.15:ENST00000310271.6:chr3:52202672:+	1118	+
chr3	52202688	52202689	ENSG00000023330.15:ENST00000310271.6:chr3:52202688:+	1118	+
chr3	52204698	52204699	ENSG00000023330.15:ENST00000310271.6:chr3:52204698:+	1118	+
chr3	52204825	52204826	ENSG00000023330.15:ENST00000310271.6:chr3:52204825:+	1118	+
chr3	52205851	52205852	ENSG00000023330.15:ENST00000310271.6:chr3:52205851:+	1118	+
chr3	52206584	52206585	ENSG00000023330.15:ENST00000310271.6:chr3:52206584:+	1118	+
chr3	52206599	52206600	ENSG00000023330.15:ENST00000310271.6:chr3:52206599:+	1118	+
chr3	52206677	52206678	ENSG00000023330.15:ENST00000310271.6:chr3:52206677:+	1118	+
chr3	52208212	52208213	ENSG00000023330.15:ENST00000310271.6:chr3:52208212:+	1118	+
chr3	52211310	52211311	ENSG00000023330.15:ENST00000310271.6:chr3:52211310:+	1118	+
chr3	52211327	52211328	ENSG00000023330.15:ENST00000310271.6:chr3:52211327:+	1118	+
chr3	52211348	52211349	ENSG00000023330.15:ENST00000310271.6:chr3:52211348:+	1118	+
chr3	52212277	52212278	ENSG00000023330.15:ENST00000310271.6:chr3:52212277:+	1118	+
chr3	52212323	52212324	ENSG00000023330.15:ENST00000310271.6:chr3:52212323:+	1118	+
chr3	52212393	52212394	ENSG00000023330.15:ENST00000310271.6:chr3:52212393:+	1118	+
chr3	52212412	52212413	ENSG00000023330.15:ENST00000310271.6:chr3:52212412:+	3118	+
chr3	52214066	52214067	ENSG00000023330.15:ENST00000310271.6:chr3:52214066:+	1118	+
chr3	52239002	52239003	ENSG00000247596.10:ENST00000305533.10:chr3:52239002:-	1197	-
chr3	52235070	52235071	ENSG00000247596.10:ENST00000305533.10:chr3:52235070:-	1197	-
chr3	52235102	52235103	ENSG00000247596.10:ENST00000305533.10:chr3:52235102:-	1197	-
chr3	52231949	52231950	ENSG00000247596.10:ENST00000305533.10:chr3:52231949:-	4197	-
chr3	52231970	52231971	ENSG00000247596.10:ENST00000305533.10:chr3:52231970:-	1197	-
chr3	52231973	52231974	ENSG00000247596.10:ENST00000305533.10:chr3:52231973:-	1197	-
chr3	52231982	52231983	ENSG00000247596.10:ENST00000305533.10:chr3:52231982:-	1197	-
chr3	52231999	52232000	ENSG00000247596.10:ENST00000305533.10:chr3:52231999:-	2197	-
chr3	52232012	52232013	ENSG00000247596.10:ENST00000305533.10:chr3:52232012:-	1197	-
chr3	52232044	52232045	ENSG00000247596.10:ENST00000305533.10:chr3:52232044:-	1197	-
chr3	52232047	52232048	ENSG00000247596.10:ENST00000305533.10:chr3:52232047:-	1197	-
chr3	52232063	52232064	ENSG00000247596.10:ENST00000305533.10:chr3:52232063:-	1197	-
chr3	52232074	52232075	ENSG00000247596.10:ENST00000305533.10:chr3:52232074:-	1197	-
chr3	52231455	52231456	ENSG00000247596.10:ENST00000305533.10:chr3:52231455:-	1197	-
chr3	52231470	52231471	ENSG00000247596.10:ENST00000305533.10:chr3:52231470:-	1197	-
chr3	52231510	52231511	ENSG00000247596.10:ENST00000305533.10:chr3:52231510:-	2197	-
chr3	52231518	52231519	ENSG00000247596.10:ENST00000305533.10:chr3:52231518:-	2197	-
chr3	52231523	52231524	ENSG00000247596.10:ENST00000305533.10:chr3:52231523:-	1197	-
chr3	52231207	52231208	ENSG00000247596.10:ENST00000305533.10:chr3:52231207:-	1197	-
chr3	52231220	52231221	ENSG00000247596.10:ENST00000305533.10:chr3:52231220:-	2197	-
chr3	52231225	52231226	ENSG00000247596.10:ENST00000305533.10:chr3:52231225:-	1197	-
chr3	52230899	52230900	ENSG00000247596.10:ENST00000305533.10:chr3:52230899:-	1197	-
chr3	52230908	52230909	ENSG00000247596.10:ENST00000305533.10:chr3:52230908:-	1197	-
chr3	52230938	52230939	ENSG00000247596.10:ENST00000305533.10:chr3:52230938:-	1197	-
chr3	52230952	52230953	ENSG00000247596.10:ENST00000305533.10:chr3:52230952:-	1197	-
chr3	52230962	52230963	ENSG00000247596.10:ENST00000305533.10:chr3:52230962:-	3197	-
chr3	52230987	52230988	ENSG00000247596.10:ENST00000305533.10:chr3:52230987:-	2197	-
chr3	52229935	52229936	ENSG00000247596.10:ENST00000305533.10:chr3:52229935:-	1197	-
chr3	52229948	52229949	ENSG00000247596.10:ENST00000305533.10:chr3:52229948:-	2197	-
chr3	52229956	52229957	ENSG00000247596.10:ENST00000305533.10:chr3:52229956:-	1197	-
chr3	52229965	52229966	ENSG00000247596.10:ENST00000305533.10:chr3:52229965:-	2197	-
chr3	52229981	52229982	ENSG00000247596.10:ENST00000305533.10:chr3:52229981:-	1197	-
chr3	52230020	52230021	ENSG00000247596.10:ENST00000305533.10:chr3:52230020:-	1197	-
chr3	52230029	52230030	ENSG00000247596.10:ENST00000305533.10:chr3:52230029:-	1197	-
chr3	52229677	52229678	ENSG00000247596.10:ENST00000305533.10:chr3:52229677:-	1197	-
chr3	52229684	52229685	ENSG00000247596.10:ENST00000305533.10:chr3:52229684:-	3197	-
chr3	52229697	52229698	ENSG00000247596.10:ENST00000305533.10:chr3:52229697:-	2197	-
chr3	52229699	52229700	ENSG00000247596.10:ENST00000305533.10:chr3:52229699:-	4197	-
chr3	52229702	52229703	ENSG00000247596.10:ENST00000305533.10:chr3:52229702:-	1197	-
chr3	52229717	52229718	ENSG00000247596.10:ENST00000305533.10:chr3:52229717:-	2197	-
chr3	52229726	52229727	ENSG00000247596.10:ENST00000305533.10:chr3:52229726:-	1197	-
chr3	52229763	52229764	ENSG00000247596.10:ENST00000305533.10:chr3:52229763:-	1197	-
chr3	52229764	52229765	ENSG00000247596.10:ENST00000305533.10:chr3:52229764:-	1197	-
chr3	52229060	52229061	ENSG00000247596.10:ENST00000305533.10:chr3:52229060:-	1197	-
chr3	52229114	52229115	ENSG00000247596.10:ENST00000305533.10:chr3:52229114:-	1197	-
chr3	52229181	52229182	ENSG00000247596.10:ENST00000305533.10:chr3:52229181:-	1196	-
chr3	52540455	52540456	ENSG00000168273.8:ENST00000307106.3:chr3:52540455:+	1,7	+
chr3	52540495	52540496	ENSG00000168273.8:ENST00000307106.3:chr3:52540495:+	1,7	+
chr3	88055483	88055484	ENSG00000163320.12:ENST00000309534.10:chr3:88055483:-	1,78	-
chr3	88055487	88055488	ENSG00000163320.12:ENST00000309534.10:chr3:88055487:-	1,78	-
chr3	88055548	88055549	ENSG00000163320.12:ENST00000309534.10:chr3:88055548:-	1,78	-
chr3	88055932	88055933	ENSG00000163320.12:ENST00000309534.10:chr3:88055932:-	1,78	-
chr3	184299293	184299294	ENSG00000175166.17:ENST00000310118.9:chr3:184299293:+	12827	+
chr3	184299299	184299300	ENSG00000175166.17:ENST00000310118.9:chr3:184299299:+	12832	+
chr3	184299302	184299303	ENSG00000175166.17:ENST00000310118.9:chr3:184299302:+	12813	+
chr3	184299318	184299319	ENSG00000175166.17:ENST00000310118.9:chr3:184299318:+	12840	+
chr3	184299321	184299322	ENSG00000175166.17:ENST00000310118.9:chr3:184299321:+	22841	+
chr3	184299331	184299332	ENSG00000175166.17:ENST00000310118.9:chr3:184299331:+	12841	+
chr3	184299347	184299348	ENSG00000175166.17:ENST00000310118.9:chr3:184299347:+	12847	+
chr3	184299352	184299353	ENSG00000175166.17:ENST00000310118.9:chr3:184299352:+	22848	+
chr3	184299355	184299356	ENSG00000175166.17:ENST00000310118.9:chr3:184299355:+	22848	+
chr3	184299398	184299399	ENSG00000175166.17:ENST00000310118.9:chr3:184299398:+	12871	+
chr3	184299868	184299869	ENSG00000175166.17:ENST00000310118.9:chr3:184299868:+	12882	+
chr3	184299889	184299890	ENSG00000175166.17:ENST00000310118.9:chr3:184299889:+	32884	+
chr3	184300300	184300301	ENSG00000175166.17:ENST00000310118.9:chr3:184300300:+	22890	+
chr3	184300307	184300308	ENSG00000175166.17:ENST00000310118.9:chr3:184300307:+	12892	+
chr3	184300358	184300359	ENSG00000175166.17:ENST00000310118.9:chr3:184300358:+	12897	+
chr3	184300363	184300364	ENSG00000175166.17:ENST00000310118.9:chr3:184300363:+	12892	+
chr3	184300365	184300366	ENSG00000175166.17:ENST00000310118.9:chr3:184300365:+	12897	+
chr3	184300430	184300431	ENSG00000175166.17:ENST00000310118.9:chr3:184300430:+	12905	+
chr3	184301574	184301575	ENSG00000175166.17:ENST00000310118.9:chr3:184301574:+	12905	+
chr3	184301644	184301645	ENSG00000175166.17:ENST00000310118.9:chr3:184301644:+	52907	+
chr3	184301847	184301848	ENSG00000175166.17:ENST00000310118.9:chr3:184301847:+	12907	+
chr3	184301854	184301855	ENSG00000175166.17:ENST00000310118.9:chr3:184301854:+	12907	+
chr3	184301942	184301943	ENSG00000175166.17:ENST00000310118.9:chr3:184301942:+	22902	+
chr3	184301945	184301946	ENSG00000175166.17:ENST00000310118.9:chr3:184301945:+	12910	+
chr3	184301956	184301957	ENSG00000175166.17:ENST00000310118.9:chr3:184301956:+	22902	+
chr3	184301970	184301971	ENSG00000175166.17:ENST00000310118.9:chr3:184301970:+	12911	+
chr3	184301977	184301978	ENSG00000175166.17:ENST00000310118.9:chr3:184301977:+	22911	+
chr3	184301981	184301982	ENSG00000175166.17:ENST00000310118.9:chr3:184301981:+	12911	+
chr3	184301988	184301989	ENSG00000175166.17:ENST00000310118.9:chr3:184301988:+	12910	+
chr3	184302015	184302016	ENSG00000175166.17:ENST00000310118.9:chr3:184302015:+	32910	+
chr3	184302057	184302058	ENSG00000175166.17:ENST00000310118.9:chr3:184302057:+	42911	+
chr3	184302404	184302405	ENSG00000175166.17:ENST00000310118.9:chr3:184302404:+	12906	+
chr3	184302406	184302407	ENSG00000175166.17:ENST00000310118.9:chr3:184302406:+	12913	+
chr3	184302447	184302448	ENSG00000175166.17:ENST00000310118.9:chr3:184302447:+	12913	+
chr3	184302450	184302451	ENSG00000175166.17:ENST00000310118.9:chr3:184302450:+	12897	+
chr3	184302458	184302459	ENSG00000175166.17:ENST00000310118.9:chr3:184302458:+	42913	+
chr3	184302470	184302471	ENSG00000175166.17:ENST00000310118.9:chr3:184302470:+	12913	+
chr3	184302512	184302513	ENSG00000175166.17:ENST00000310118.9:chr3:184302512:+	12913	+
chr3	184302698	184302699	ENSG00000175166.17:ENST00000310118.9:chr3:184302698:+	22915	+
chr3	184302779	184302780	ENSG00000175166.17:ENST00000310118.9:chr3:184302779:+	12913	+
chr3	184302790	184302791	ENSG00000175166.17:ENST00000310118.9:chr3:184302790:+	12915	+
chr3	184302815	184302816	ENSG00000175166.17:ENST00000310118.9:chr3:184302815:+	12916	+
chr3	184303009	184303010	ENSG00000175166.17:ENST00000310118.9:chr3:184303009:+	42916	+
chr3	184303016	184303017	ENSG00000175166.17:ENST00000310118.9:chr3:184303016:+	12911	+
chr3	184303017	184303018	ENSG00000175166.17:ENST00000310118.9:chr3:184303017:+	12917	+
chr3	184303018	184303019	ENSG00000175166.17:ENST00000310118.9:chr3:184303018:+	12917	+
chr3	184303048	184303049	ENSG00000175166.17:ENST00000310118.9:chr3:184303048:+	52913	+
chr3	184303339	184303340	ENSG00000175166.17:ENST00000310118.9:chr3:184303339:+	22921	+
chr3	184303352	184303353	ENSG00000175166.17:ENST00000310118.9:chr3:184303352:+	32908	+
chr3	184303354	184303355	ENSG00000175166.17:ENST00000310118.9:chr3:184303354:+	12921	+
chr3	184303386	184303387	ENSG00000175166.17:ENST00000310118.9:chr3:184303386:+	12922	+
chr3	184303397	184303398	ENSG00000175166.17:ENST00000310118.9:chr3:184303397:+	12922	+
chr3	184303400	184303401	ENSG00000175166.17:ENST00000310118.9:chr3:184303400:+	12922	+
chr3	184303434	184303435	ENSG00000175166.17:ENST00000310118.9:chr3:184303434:+	22922	+
chr3	184303462	184303463	ENSG00000175166.17:ENST00000310118.9:chr3:184303462:+	12923	+
chr3	184303665	184303666	ENSG00000175166.17:ENST00000310118.9:chr3:184303665:+	32923	+
chr3	184303680	184303681	ENSG00000175166.17:ENST00000310118.9:chr3:184303680:+	22924	+
chr3	184303722	184303723	ENSG00000175166.17:ENST00000310118.9:chr3:184303722:+	12925	+
chr3	184303729	184303730	ENSG00000175166.17:ENST00000310118.9:chr3:184303729:+	32921	+
chr3	184303962	184303963	ENSG00000175166.17:ENST00000310118.9:chr3:184303962:+	12919	+
chr3	184304003	184304004	ENSG00000175166.17:ENST00000310118.9:chr3:184304003:+	12925	+
chr3	184304007	184304008	ENSG00000175166.17:ENST00000310118.9:chr3:184304007:+	32925	+
chr3	184304013	184304014	ENSG00000175166.17:ENST00000310118.9:chr3:184304013:+	12925	+
chr3	184304304	184304305	ENSG00000175166.17:ENST00000310118.9:chr3:184304304:+	12926	+
chr3	184304320	184304321	ENSG00000175166.17:ENST00000310118.9:chr3:184304320:+	12926	+
chr3	184304352	184304353	ENSG00000175166.17:ENST00000310118.9:chr3:184304352:+	12926	+
chr3	184304355	184304356	ENSG00000175166.17:ENST00000310118.9:chr3:184304355:+	22926	+
chr3	184304380	184304381	ENSG00000175166.17:ENST00000310118.9:chr3:184304380:+	12918	+
chr3	184304384	184304385	ENSG00000175166.17:ENST00000310118.9:chr3:184304384:+	12926	+
chr3	184305845	184305846	ENSG00000175166.17:ENST00000310118.9:chr3:184305845:+	22928	+
chr3	184305893	184305894	ENSG00000175166.17:ENST00000310118.9:chr3:184305893:+	22929	+
chr3	184305899	184305900	ENSG00000175166.17:ENST00000310118.9:chr3:184305899:+	12929	+
chr3	184305917	184305918	ENSG00000175166.17:ENST00000310118.9:chr3:184305917:+	12929	+
chr3	184306083	184306084	ENSG00000175166.17:ENST00000310118.9:chr3:184306083:+	12928	+
chr3	184306128	184306129	ENSG00000175166.17:ENST00000310118.9:chr3:184306128:+	12929	+
chr3	184306350	184306351	ENSG00000175166.17:ENST00000310118.9:chr3:184306350:+	32929	+
chr3	184306363	184306364	ENSG00000175166.17:ENST00000310118.9:chr3:184306363:+	12930	+
chr3	184306378	184306379	ENSG00000175166.17:ENST00000310118.9:chr3:184306378:+	22932	+
chr3	184306381	184306382	ENSG00000175166.17:ENST00000310118.9:chr3:184306381:+	22932	+
chr3	184306470	184306471	ENSG00000175166.17:ENST00000310118.9:chr3:184306470:+	12577	+
chr3	184306471	184306472	ENSG00000175166.17:ENST00000310118.9:chr3:184306471:+	12577	+
chr3	184306475	184306476	ENSG00000175166.17:ENST00000310118.9:chr3:184306475:+	12577	+
chr3	184306487	184306488	ENSG00000175166.17:ENST00000310118.9:chr3:184306487:+	32577	+
chr3	184306781	184306782	ENSG00000175166.17:ENST00000310118.9:chr3:184306781:+	42578	+
chr3	184306811	184306812	ENSG00000175166.17:ENST00000310118.9:chr3:184306811:+	12578	+
chr3	184307412	184307413	ENSG00000175166.17:ENST00000310118.9:chr3:184307412:+	52578	+
chr3	184307448	184307449	ENSG00000175166.17:ENST00000310118.9:chr3:184307448:+	12579	+
chr3	184307471	184307472	ENSG00000175166.17:ENST00000310118.9:chr3:184307471:+	12579	+
chr3	184307477	184307478	ENSG00000175166.17:ENST00000310118.9:chr3:184307477:+	12579	+
chr3	184307505	184307506	ENSG00000175166.17:ENST00000310118.9:chr3:184307505:+	12579	+
chr3	184307511	184307512	ENSG00000175166.17:ENST00000310118.9:chr3:184307511:+	12579	+
chr3	184307627	184307628	ENSG00000175166.17:ENST00000310118.9:chr3:184307627:+	12579	+
chr3	184307648	184307649	ENSG00000175166.17:ENST00000310118.9:chr3:184307648:+	12579	+
chr3	184307655	184307656	ENSG00000175166.17:ENST00000310118.9:chr3:184307655:+	22579	+
chr3	184307667	184307668	ENSG00000175166.17:ENST00000310118.9:chr3:184307667:+	12575	+
chr3	184307698	184307699	ENSG00000175166.17:ENST00000310118.9:chr3:184307698:+	22580	+
chr3	184307915	184307916	ENSG00000175166.17:ENST00000310118.9:chr3:184307915:+	12580	+
chr3	184307916	184307917	ENSG00000175166.17:ENST00000310118.9:chr3:184307916:+	12580	+
chr3	184307921	184307922	ENSG00000175166.17:ENST00000310118.9:chr3:184307921:+	12580	+
chr3	184307922	184307923	ENSG00000175166.17:ENST00000310118.9:chr3:184307922:+	12580	+
chr3	184307927	184307928	ENSG00000175166.17:ENST00000310118.9:chr3:184307927:+	12570	+
chr3	184307929	184307930	ENSG00000175166.17:ENST00000310118.9:chr3:184307929:+	12580	+
chr3	184307943	184307944	ENSG00000175166.17:ENST00000310118.9:chr3:184307943:+	12580	+
chr3	184307946	184307947	ENSG00000175166.17:ENST00000310118.9:chr3:184307946:+	12580	+
chr3	184307957	184307958	ENSG00000175166.17:ENST00000310118.9:chr3:184307957:+	12577	+
chr3	184307965	184307966	ENSG00000175166.17:ENST00000310118.9:chr3:184307965:+	12574	+
chr3	184307971	184307972	ENSG00000175166.17:ENST00000310118.9:chr3:184307971:+	22580	+
chr3	184308000	184308001	ENSG00000175166.17:ENST00000310118.9:chr3:184308000:+	22580	+
chr3	184308498	184308499	ENSG00000175166.17:ENST00000310118.9:chr3:184308498:+	12580	+
chr3	184308543	184308544	ENSG00000175166.17:ENST00000310118.9:chr3:184308543:+	12574	+
chr3	184308555	184308556	ENSG00000175166.17:ENST00000310118.9:chr3:184308555:+	12579	+
chr3	184308737	184308738	ENSG00000175166.17:ENST00000310118.9:chr3:184308737:+	12572	+
chr3	184308771	184308772	ENSG00000175166.17:ENST00000310118.9:chr3:184308771:+	32570	+
chr3	184308810	184308811	ENSG00000175166.17:ENST00000310118.9:chr3:184308810:+	12579	+
chr3	184308837	184308838	ENSG00000175166.17:ENST00000310118.9:chr3:184308837:+	12580	+
chr3	184308859	184308860	ENSG00000175166.17:ENST00000310118.9:chr3:184308859:+	22579	+
chr3	184308871	184308872	ENSG00000175166.17:ENST00000310118.9:chr3:184308871:+	12572	+
chr4	4541856	4541857	ENSG00000168818.10:ENST00000306200.7:chr4:4541856:-	1194	-
chr4	4541904	4541905	ENSG00000168818.10:ENST00000306200.7:chr4:4541904:-	2194	-
chr4	4541920	4541921	ENSG00000168818.10:ENST00000306200.7:chr4:4541920:-	1194	-
chr4	4541925	4541926	ENSG00000168818.10:ENST00000306200.7:chr4:4541925:-	1194	-
chr4	4471666	4471667	ENSG00000168818.10:ENST00000306200.7:chr4:4471666:-	1195	-
chr4	4471701	4471702	ENSG00000168818.10:ENST00000306200.7:chr4:4471701:-	2195	-
chr4	4459376	4459377	ENSG00000168818.10:ENST00000306200.7:chr4:4459376:-	1198	-
chr4	4459380	4459381	ENSG00000168818.10:ENST00000306200.7:chr4:4459380:-	2198	-
chr4	4459383	4459384	ENSG00000168818.10:ENST00000306200.7:chr4:4459383:-	1198	-
chr4	4459389	4459390	ENSG00000168818.10:ENST00000306200.7:chr4:4459389:-	1198	-
chr4	4459432	4459433	ENSG00000168818.10:ENST00000306200.7:chr4:4459432:-	1197	-
chr4	4459441	4459442	ENSG00000168818.10:ENST00000306200.7:chr4:4459441:-	1197	-
chr4	4459451	4459452	ENSG00000168818.10:ENST00000306200.7:chr4:4459451:-	1197	-
chr4	4457485	4457486	ENSG00000168818.10:ENST00000306200.7:chr4:4457485:-	1198	-
chr4	4457497	4457498	ENSG00000168818.10:ENST00000306200.7:chr4:4457497:-	1198	-
chr4	4457238	4457239	ENSG00000168818.10:ENST00000306200.7:chr4:4457238:-	1200	-
chr4	4457240	4457241	ENSG00000168818.10:ENST00000306200.7:chr4:4457240:-	1200	-
chr4	4457245	4457246	ENSG00000168818.10:ENST00000306200.7:chr4:4457245:-	1200	-
chr4	4438399	4438400	ENSG00000168818.10:ENST00000306200.7:chr4:4438399:-	2200	-
chr4	4438461	4438462	ENSG00000168818.10:ENST00000306200.7:chr4:4438461:-	1200	-
chr4	4438464	4438465	ENSG00000168818.10:ENST00000306200.7:chr4:4438464:-	1200	-
chr4	4438482	4438483	ENSG00000168818.10:ENST00000306200.7:chr4:4438482:-	2200	-
chr4	4438495	4438496	ENSG00000168818.10:ENST00000306200.7:chr4:4438495:-	1200	-
chr4	4434774	4434775	ENSG00000168818.10:ENST00000306200.7:chr4:4434774:-	2201	-
chr4	4434821	4434822	ENSG00000168818.10:ENST00000306200.7:chr4:4434821:-	1200	-
chr4	4434834	4434835	ENSG00000168818.10:ENST00000306200.7:chr4:4434834:-	1201	-
chr4	4434839	4434840	ENSG00000168818.10:ENST00000306200.7:chr4:4434839:-	1200	-
chr4	4425183	4425184	ENSG00000168818.10:ENST00000306200.7:chr4:4425183:-	1201	-
chr4	4425200	4425201	ENSG00000168818.10:ENST00000306200.7:chr4:4425200:-	1201	-
chr4	4425215	4425216	ENSG00000168818.10:ENST00000306200.7:chr4:4425215:-	3201	-
chr4	4423557	4423558	ENSG00000168818.10:ENST00000306200.7:chr4:4423557:-	1201	-
chr4	4420900	4420901	ENSG00000168818.10:ENST00000306200.7:chr4:4420900:-	1201	-
chr4	4420929	4420930	ENSG00000168818.10:ENST00000306200.7:chr4:4420929:-	1201	-
chr4	4420039	4420040	ENSG00000168818.10:ENST00000306200.7:chr4:4420039:-	1201	-
chr4	4420081	4420082	ENSG00000168818.10:ENST00000306200.7:chr4:4420081:-	1201	-
chr4	4420090	4420091	ENSG00000168818.10:ENST00000306200.7:chr4:4420090:-	1201	-
chr4	4420114	4420115	ENSG00000168818.10:ENST00000306200.7:chr4:4420114:-	1201	-
chr4	6674293	6674294	ENSG00000170846.17:ENST00000307533.10:chr4:6674293:+	1,8	+
chr4	8286608	8286609	ENSG00000170801.10:ENST00000307358.7:chr4:8286608:+	1,19	+
chr4	8294160	8294161	ENSG00000170801.10:ENST00000307358.7:chr4:8294160:+	1,19	+
chr4	8304231	8304232	ENSG00000170801.10:ENST00000307358.7:chr4:8304231:+	1,19	+
chr4	8306114	8306115	ENSG00000170801.10:ENST00000307358.7:chr4:8306114:+	1,19	+
chr4	53425958	53425959	ENSG00000145216.16:ENST00000306932.10:chr4:53425958:+	1,18	+
chr4	53428058	53428059	ENSG00000145216.16:ENST00000306932.10:chr4:53428058:+	1,18	+
chr4	53428131	53428132	ENSG00000145216.16:ENST00000306932.10:chr4:53428131:+	1,18	+
chr4	143185636	143185637	ENSG00000170185.11:ENST00000307017.9:chr4:143185636:+	1,7	+
chr4	143213979	143213980	ENSG00000170185.11:ENST00000307017.9:chr4:143213979:+	1,7	+
chr4	143214033	143214034	ENSG00000170185.11:ENST00000307017.9:chr4:143214033:+	1,7	+
chr5	43556601	43556602	ENSG00000172239.14:ENST00000306846.8:chr5:43556601:-	2127	-
chr5	43556644	43556645	ENSG00000172239.14:ENST00000306846.8:chr5:43556644:-	1124	-
chr5	43556683	43556684	ENSG00000172239.14:ENST00000306846.8:chr5:43556683:-	1124	-
chr5	43556717	43556718	ENSG00000172239.14:ENST00000306846.8:chr5:43556717:-	1123	-
chr5	43556747	43556748	ENSG00000172239.14:ENST00000306846.8:chr5:43556747:-	3120	-
chr5	43556762	43556763	ENSG00000172239.14:ENST00000306846.8:chr5:43556762:-	1119	-
chr5	43556837	43556838	ENSG00000172239.14:ENST00000306846.8:chr5:43556837:-	1112	-
chr5	43555948	43555949	ENSG00000172239.14:ENST00000306846.8:chr5:43555948:-	1127	-
chr5	43555972	43555973	ENSG00000172239.14:ENST00000306846.8:chr5:43555972:-	1127	-
chr5	43555992	43555993	ENSG00000172239.14:ENST00000306846.8:chr5:43555992:-	1127	-
chr5	43547770	43547771	ENSG00000172239.14:ENST00000306846.8:chr5:43547770:-	1127	-
chr5	43547773	43547774	ENSG00000172239.14:ENST00000306846.8:chr5:43547773:-	2127	-
chr5	43547804	43547805	ENSG00000172239.14:ENST00000306846.8:chr5:43547804:-	1127	-
chr5	43547843	43547844	ENSG00000172239.14:ENST00000306846.8:chr5:43547843:-	1127	-
chr5	43543037	43543038	ENSG00000172239.14:ENST00000306846.8:chr5:43543037:-	1127	-
chr5	43538981	43538982	ENSG00000172239.14:ENST00000306846.8:chr5:43538981:-	1127	-
chr5	43536889	43536890	ENSG00000172239.14:ENST00000306846.8:chr5:43536889:-	2127	-
chr5	43536925	43536926	ENSG00000172239.14:ENST00000306846.8:chr5:43536925:-	1127	-
chr5	43535635	43535636	ENSG00000172239.14:ENST00000306846.8:chr5:43535635:-	1127	-
chr5	43534861	43534862	ENSG00000172239.14:ENST00000306846.8:chr5:43534861:-	1125	-
chr5	43534895	43534896	ENSG00000172239.14:ENST00000306846.8:chr5:43534895:-	1125	-
chr5	43534959	43534960	ENSG00000172239.14:ENST00000306846.8:chr5:43534959:-	1125	-
chr5	43529831	43529832	ENSG00000172239.14:ENST00000306846.8:chr5:43529831:-	1123	-
chr5	43527380	43527381	ENSG00000172239.14:ENST00000306846.8:chr5:43527380:-	4123	-
chr5	43527465	43527466	ENSG00000172239.14:ENST00000306846.8:chr5:43527465:-	1123	-
chr5	141477408	141477409	ENSG00000240184.7:ENST00000308177.5:chr5:141477408:+	1,2	+
chr5	141477987	141477988	ENSG00000240184.7:ENST00000308177.5:chr5:141477987:+	1,2	+
chr5	177468848	177468849	ENSG00000113758.13:ENST00000309007.9:chr5:177468848:-	1181	-
chr5	177468122	177468123	ENSG00000113758.13:ENST00000309007.9:chr5:177468122:-	1181	-
chr5	177468167	177468168	ENSG00000113758.13:ENST00000309007.9:chr5:177468167:-	4181	-
chr5	177467748	177467749	ENSG00000113758.13:ENST00000309007.9:chr5:177467748:-	1181	-
chr5	177467769	177467770	ENSG00000113758.13:ENST00000309007.9:chr5:177467769:-	1181	-
chr5	177467519	177467520	ENSG00000113758.13:ENST00000309007.9:chr5:177467519:-	3182	-
chr5	177467552	177467553	ENSG00000113758.13:ENST00000309007.9:chr5:177467552:-	1182	-
chr5	177467588	177467589	ENSG00000113758.13:ENST00000309007.9:chr5:177467588:-	2182	-
chr5	177467281	177467282	ENSG00000113758.13:ENST00000309007.9:chr5:177467281:-	1182	-
chr5	177467312	177467313	ENSG00000113758.13:ENST00000309007.9:chr5:177467312:-	3182	-
chr5	177467327	177467328	ENSG00000113758.13:ENST00000309007.9:chr5:177467327:-	1182	-
chr5	177466912	177466913	ENSG00000113758.13:ENST00000309007.9:chr5:177466912:-	1182	-
chr5	177466921	177466922	ENSG00000113758.13:ENST00000309007.9:chr5:177466921:-	1182	-
chr5	177466999	177467000	ENSG00000113758.13:ENST00000309007.9:chr5:177466999:-	1182	-
chr5	177466827	177466828	ENSG00000113758.13:ENST00000309007.9:chr5:177466827:-	1182	-
chr5	177460455	177460456	ENSG00000113758.13:ENST00000309007.9:chr5:177460455:-	2184	-
chr5	177460481	177460482	ENSG00000113758.13:ENST00000309007.9:chr5:177460481:-	1184	-
chr5	177460486	177460487	ENSG00000113758.13:ENST00000309007.9:chr5:177460486:-	1184	-
chr5	177460504	177460505	ENSG00000113758.13:ENST00000309007.9:chr5:177460504:-	1184	-
chr5	177460527	177460528	ENSG00000113758.13:ENST00000309007.9:chr5:177460527:-	1184	-
chr5	177459138	177459139	ENSG00000113758.13:ENST00000309007.9:chr5:177459138:-	1184	-
chr5	177459144	177459145	ENSG00000113758.13:ENST00000309007.9:chr5:177459144:-	1184	-
chr5	177459172	177459173	ENSG00000113758.13:ENST00000309007.9:chr5:177459172:-	1184	-
chr5	177459186	177459187	ENSG00000113758.13:ENST00000309007.9:chr5:177459186:-	1184	-
chr5	177459203	177459204	ENSG00000113758.13:ENST00000309007.9:chr5:177459203:-	1184	-
chr5	177459229	177459230	ENSG00000113758.13:ENST00000309007.9:chr5:177459229:-	1184	-
chr5	177458091	177458092	ENSG00000113758.13:ENST00000309007.9:chr5:177458091:-	1184	-
chr5	177458099	177458100	ENSG00000113758.13:ENST00000309007.9:chr5:177458099:-	1184	-
chr5	177458237	177458238	ENSG00000113758.13:ENST00000309007.9:chr5:177458237:-	3184	-
chr5	177458250	177458251	ENSG00000113758.13:ENST00000309007.9:chr5:177458250:-	1184	-
chr5	177458275	177458276	ENSG00000113758.13:ENST00000309007.9:chr5:177458275:-	1184	-
chr5	177458328	177458329	ENSG00000113758.13:ENST00000309007.9:chr5:177458328:-	1184	-
chr5	177458418	177458419	ENSG00000113758.13:ENST00000309007.9:chr5:177458418:-	1184	-
chr5	177458432	177458433	ENSG00000113758.13:ENST00000309007.9:chr5:177458432:-	1184	-
chr5	177458448	177458449	ENSG00000113758.13:ENST00000309007.9:chr5:177458448:-	1184	-
chr5	177458463	177458464	ENSG00000113758.13:ENST00000309007.9:chr5:177458463:-	2184	-
chr5	177458465	177458466	ENSG00000113758.13:ENST00000309007.9:chr5:177458465:-	1184	-
chr5	177458507	177458508	ENSG00000113758.13:ENST00000309007.9:chr5:177458507:-	1184	-
chr5	177458535	177458536	ENSG00000113758.13:ENST00000309007.9:chr5:177458535:-	1184	-
chr5	177458611	177458612	ENSG00000113758.13:ENST00000309007.9:chr5:177458611:-	2184	-
chr5	177458617	177458618	ENSG00000113758.13:ENST00000309007.9:chr5:177458617:-	1184	-
chr5	177458678	177458679	ENSG00000113758.13:ENST00000309007.9:chr5:177458678:-	2184	-
chr5	177457686	177457687	ENSG00000113758.13:ENST00000309007.9:chr5:177457686:-	1183	-
chr5	177457692	177457693	ENSG00000113758.13:ENST00000309007.9:chr5:177457692:-	1183	-
chr5	177457735	177457736	ENSG00000113758.13:ENST00000309007.9:chr5:177457735:-	1183	-
chr5	177457742	177457743	ENSG00000113758.13:ENST00000309007.9:chr5:177457742:-	1183	-
chr5	177457478	177457479	ENSG00000113758.13:ENST00000309007.9:chr5:177457478:-	3183	-
chr5	180791668	180791669	ENSG00000131446.17:ENST00000307826.5:chr5:180791668:-	1384	-
chr5	180791681	180791682	ENSG00000131446.17:ENST00000307826.5:chr5:180791681:-	1384	-
chr5	180791705	180791706	ENSG00000131446.17:ENST00000307826.5:chr5:180791705:-	1384	-
chr5	180791762	180791763	ENSG00000131446.17:ENST00000307826.5:chr5:180791762:-	1384	-
chr5	180791840	180791841	ENSG00000131446.17:ENST00000307826.5:chr5:180791840:-	1384	-
chr5	180791984	180791985	ENSG00000131446.17:ENST00000307826.5:chr5:180791984:-	1384	-
chr5	180792008	180792009	ENSG00000131446.17:ENST00000307826.5:chr5:180792008:-	1384	-
chr5	180792045	180792046	ENSG00000131446.17:ENST00000307826.5:chr5:180792045:-	1384	-
chr5	180792104	180792105	ENSG00000131446.17:ENST00000307826.5:chr5:180792104:-	1384	-
chr5	180792141	180792142	ENSG00000131446.17:ENST00000307826.5:chr5:180792141:-	2384	-
chr5	180792185	180792186	ENSG00000131446.17:ENST00000307826.5:chr5:180792185:-	1384	-
chr5	180792239	180792240	ENSG00000131446.17:ENST00000307826.5:chr5:180792239:-	1384	-
chr5	180792242	180792243	ENSG00000131446.17:ENST00000307826.5:chr5:180792242:-	2384	-
chr5	180792304	180792305	ENSG00000131446.17:ENST00000307826.5:chr5:180792304:-	1384	-
chr5	180792308	180792309	ENSG00000131446.17:ENST00000307826.5:chr5:180792308:-	2384	-
chr5	180792314	180792315	ENSG00000131446.17:ENST00000307826.5:chr5:180792314:-	2384	-
chr5	180792320	180792321	ENSG00000131446.17:ENST00000307826.5:chr5:180792320:-	1384	-
chr5	180792325	180792326	ENSG00000131446.17:ENST00000307826.5:chr5:180792325:-	1384	-
chr5	180792370	180792371	ENSG00000131446.17:ENST00000307826.5:chr5:180792370:-	2384	-
chr5	180792401	180792402	ENSG00000131446.17:ENST00000307826.5:chr5:180792401:-	1384	-
chr5	180792404	180792405	ENSG00000131446.17:ENST00000307826.5:chr5:180792404:-	1384	-
chr5	180792416	180792417	ENSG00000131446.17:ENST00000307826.5:chr5:180792416:-	2384	-
chr5	180792451	180792452	ENSG00000131446.17:ENST00000307826.5:chr5:180792451:-	1384	-
chr5	180792473	180792474	ENSG00000131446.17:ENST00000307826.5:chr5:180792473:-	2384	-
chr5	180792478	180792479	ENSG00000131446.17:ENST00000307826.5:chr5:180792478:-	1384	-
chr5	180792492	180792493	ENSG00000131446.17:ENST00000307826.5:chr5:180792492:-	1384	-
chr5	180792515	180792516	ENSG00000131446.17:ENST00000307826.5:chr5:180792515:-	1384	-
chr5	180792550	180792551	ENSG00000131446.17:ENST00000307826.5:chr5:180792550:-	1384	-
chr5	180792557	180792558	ENSG00000131446.17:ENST00000307826.5:chr5:180792557:-	2384	-
chr5	180792565	180792566	ENSG00000131446.17:ENST00000307826.5:chr5:180792565:-	2384	-
chr5	180792638	180792639	ENSG00000131446.17:ENST00000307826.5:chr5:180792638:-	1384	-
chr5	180792707	180792708	ENSG00000131446.17:ENST00000307826.5:chr5:180792707:-	1384	-
chr5	180792708	180792709	ENSG00000131446.17:ENST00000307826.5:chr5:180792708:-	2384	-
chr5	180792738	180792739	ENSG00000131446.17:ENST00000307826.5:chr5:180792738:-	1384	-
chr5	180792751	180792752	ENSG00000131446.17:ENST00000307826.5:chr5:180792751:-	1384	-
chr5	180792831	180792832	ENSG00000131446.17:ENST00000307826.5:chr5:180792831:-	1384	-
chr5	180792832	180792833	ENSG00000131446.17:ENST00000307826.5:chr5:180792832:-	1384	-
chr5	180792866	180792867	ENSG00000131446.17:ENST00000307826.5:chr5:180792866:-	1384	-
chr5	180792871	180792872	ENSG00000131446.17:ENST00000307826.5:chr5:180792871:-	1384	-
chr5	180792890	180792891	ENSG00000131446.17:ENST00000307826.5:chr5:180792890:-	1384	-
chr5	180792951	180792952	ENSG00000131446.17:ENST00000307826.5:chr5:180792951:-	1383	-
chr5	180792954	180792955	ENSG00000131446.17:ENST00000307826.5:chr5:180792954:-	1384	-
chr6	73519886	73519887	ENSG00000156508.19:ENST00000309268.11:chr6:73519886:-	23707	-
chr6	73519960	73519961	ENSG00000156508.19:ENST00000309268.11:chr6:73519960:-	23706	-
chr6	73519969	73519970	ENSG00000156508.19:ENST00000309268.11:chr6:73519969:-	13709	-
chr6	73520007	73520008	ENSG00000156508.19:ENST00000309268.11:chr6:73520007:-	13709	-
chr6	73519340	73519341	ENSG00000156508.19:ENST00000309268.11:chr6:73519340:-	13709	-
chr6	73519384	73519385	ENSG00000156508.19:ENST00000309268.11:chr6:73519384:-	13709	-
chr6	73519414	73519415	ENSG00000156508.19:ENST00000309268.11:chr6:73519414:-	13705	-
chr6	73519466	73519467	ENSG00000156508.19:ENST00000309268.11:chr6:73519466:-	23709	-
chr6	73519489	73519490	ENSG00000156508.19:ENST00000309268.11:chr6:73519489:-	13702	-
chr6	73519502	73519503	ENSG00000156508.19:ENST00000309268.11:chr6:73519502:-	23709	-
chr6	73518997	73518998	ENSG00000156508.19:ENST00000309268.11:chr6:73518997:-	13697	-
chr6	73519006	73519007	ENSG00000156508.19:ENST00000309268.11:chr6:73519006:-	23709	-
chr6	73519140	73519141	ENSG00000156508.19:ENST00000309268.11:chr6:73519140:-	33698	-
chr6	73519158	73519159	ENSG00000156508.19:ENST00000309268.11:chr6:73519158:-	23709	-
chr6	73519168	73519169	ENSG00000156508.19:ENST00000309268.11:chr6:73519168:-	13706	-
chr6	73519178	73519179	ENSG00000156508.19:ENST00000309268.11:chr6:73519178:-	23709	-
chr6	73518730	73518731	ENSG00000156508.19:ENST00000309268.11:chr6:73518730:-	43709	-
chr6	73518734	73518735	ENSG00000156508.19:ENST00000309268.11:chr6:73518734:-	13704	-
chr6	73518736	73518737	ENSG00000156508.19:ENST00000309268.11:chr6:73518736:-	13709	-
chr6	73518747	73518748	ENSG00000156508.19:ENST00000309268.11:chr6:73518747:-	13700	-
chr6	73518756	73518757	ENSG00000156508.19:ENST00000309268.11:chr6:73518756:-	23709	-
chr6	73518763	73518764	ENSG00000156508.19:ENST00000309268.11:chr6:73518763:-	13707	-
chr6	73518764	73518765	ENSG00000156508.19:ENST00000309268.11:chr6:73518764:-	23709	-
chr6	73518767	73518768	ENSG00000156508.19:ENST00000309268.11:chr6:73518767:-	13709	-
chr6	73518777	73518778	ENSG00000156508.19:ENST00000309268.11:chr6:73518777:-	13709	-
chr6	73518787	73518788	ENSG00000156508.19:ENST00000309268.11:chr6:73518787:-	13709	-
chr6	73518791	73518792	ENSG00000156508.19:ENST00000309268.11:chr6:73518791:-	23708	-
chr6	73518806	73518807	ENSG00000156508.19:ENST00000309268.11:chr6:73518806:-	23709	-
chr6	73518817	73518818	ENSG00000156508.19:ENST00000309268.11:chr6:73518817:-	13704	-
chr6	73518836	73518837	ENSG00000156508.19:ENST00000309268.11:chr6:73518836:-	43709	-
chr6	73518365	73518366	ENSG00000156508.19:ENST00000309268.11:chr6:73518365:-	23709	-
chr6	73518381	73518382	ENSG00000156508.19:ENST00000309268.11:chr6:73518381:-	13709	-
chr6	73518385	73518386	ENSG00000156508.19:ENST00000309268.11:chr6:73518385:-	33709	-
chr6	73518395	73518396	ENSG00000156508.19:ENST00000309268.11:chr6:73518395:-	13709	-
chr6	73518405	73518406	ENSG00000156508.19:ENST00000309268.11:chr6:73518405:-	13708	-
chr6	73518471	73518472	ENSG00000156508.19:ENST00000309268.11:chr6:73518471:-	13705	-
chr6	73518037	73518038	ENSG00000156508.19:ENST00000309268.11:chr6:73518037:-	13706	-
chr6	73518068	73518069	ENSG00000156508.19:ENST00000309268.11:chr6:73518068:-	23709	-
chr6	73518076	73518077	ENSG00000156508.19:ENST00000309268.11:chr6:73518076:-	23706	-
chr6	73518093	73518094	ENSG00000156508.19:ENST00000309268.11:chr6:73518093:-	13707	-
chr6	73518094	73518095	ENSG00000156508.19:ENST00000309268.11:chr6:73518094:-	13709	-
chr6	73518097	73518098	ENSG00000156508.19:ENST00000309268.11:chr6:73518097:-	13709	-
chr6	73518123	73518124	ENSG00000156508.19:ENST00000309268.11:chr6:73518123:-	23709	-
chr6	73518170	73518171	ENSG00000156508.19:ENST00000309268.11:chr6:73518170:-	23709	-
chr6	73518175	73518176	ENSG00000156508.19:ENST00000309268.11:chr6:73518175:-	23709	-
chr6	73518196	73518197	ENSG00000156508.19:ENST00000309268.11:chr6:73518196:-	13709	-
chr6	73518219	73518220	ENSG00000156508.19:ENST00000309268.11:chr6:73518219:-	13709	-
chr6	73518220	73518221	ENSG00000156508.19:ENST00000309268.11:chr6:73518220:-	13709	-
chr6	73518228	73518229	ENSG00000156508.19:ENST00000309268.11:chr6:73518228:-	23706	-
chr6	73518229	73518230	ENSG00000156508.19:ENST00000309268.11:chr6:73518229:-	23709	-
chr6	73518231	73518232	ENSG00000156508.19:ENST00000309268.11:chr6:73518231:-	23709	-
chr6	73518239	73518240	ENSG00000156508.19:ENST00000309268.11:chr6:73518239:-	13700	-
chr6	73518240	73518241	ENSG00000156508.19:ENST00000309268.11:chr6:73518240:-	13709	-
chr6	73518244	73518245	ENSG00000156508.19:ENST00000309268.11:chr6:73518244:-	23707	-
chr6	73518248	73518249	ENSG00000156508.19:ENST00000309268.11:chr6:73518248:-	13707	-
chr6	73517816	73517817	ENSG00000156508.19:ENST00000309268.11:chr6:73517816:-	13709	-
chr6	73517855	73517856	ENSG00000156508.19:ENST00000309268.11:chr6:73517855:-	33709	-
chr6	73517861	73517862	ENSG00000156508.19:ENST00000309268.11:chr6:73517861:-	13709	-
chr6	73517864	73517865	ENSG00000156508.19:ENST00000309268.11:chr6:73517864:-	13709	-
chr6	73517879	73517880	ENSG00000156508.19:ENST00000309268.11:chr6:73517879:-	23709	-
chr6	73517924	73517925	ENSG00000156508.19:ENST00000309268.11:chr6:73517924:-	13709	-
chr6	109382206	109382207	ENSG00000135535.17:ENST00000310786.10:chr6:109382206:-	1132	-
chr6	109382214	109382215	ENSG00000135535.17:ENST00000310786.10:chr6:109382214:-	2132	-
chr6	109382217	109382218	ENSG00000135535.17:ENST00000310786.10:chr6:109382217:-	2132	-
chr6	109382259	109382260	ENSG00000135535.17:ENST00000310786.10:chr6:109382259:-	1132	-
chr6	109382265	109382266	ENSG00000135535.17:ENST00000310786.10:chr6:109382265:-	1132	-
chr6	109382282	109382283	ENSG00000135535.17:ENST00000310786.10:chr6:109382282:-	1132	-
chr6	109382288	109382289	ENSG00000135535.17:ENST00000310786.10:chr6:109382288:-	2132	-
chr6	109382298	109382299	ENSG00000135535.17:ENST00000310786.10:chr6:109382298:-	1132	-
chr6	109382306	109382307	ENSG00000135535.17:ENST00000310786.10:chr6:109382306:-	1132	-
chr6	109382321	109382322	ENSG00000135535.17:ENST00000310786.10:chr6:109382321:-	1132	-
chr6	109382366	109382367	ENSG00000135535.17:ENST00000310786.10:chr6:109382366:-	1130	-
chr6	109379631	109379632	ENSG00000135535.17:ENST00000310786.10:chr6:109379631:-	1132	-
chr6	109379642	109379643	ENSG00000135535.17:ENST00000310786.10:chr6:109379642:-	1132	-
chr6	109377913	109377914	ENSG00000135535.17:ENST00000310786.10:chr6:109377913:-	1132	-
chr6	109377929	109377930	ENSG00000135535.17:ENST00000310786.10:chr6:109377929:-	1132	-
chr6	109377948	109377949	ENSG00000135535.17:ENST00000310786.10:chr6:109377948:-	1132	-
chr6	109376097	109376098	ENSG00000135535.17:ENST00000310786.10:chr6:109376097:-	2132	-
chr6	109376099	109376100	ENSG00000135535.17:ENST00000310786.10:chr6:109376099:-	3132	-
chr6	109370412	109370413	ENSG00000135535.17:ENST00000310786.10:chr6:109370412:-	1132	-
chr6	109370415	109370416	ENSG00000135535.17:ENST00000310786.10:chr6:109370415:-	1132	-
chr6	109370418	109370419	ENSG00000135535.17:ENST00000310786.10:chr6:109370418:-	1132	-
chr6	109370424	109370425	ENSG00000135535.17:ENST00000310786.10:chr6:109370424:-	1132	-
chr6	109370430	109370431	ENSG00000135535.17:ENST00000310786.10:chr6:109370430:-	1132	-
chr6	109370433	109370434	ENSG00000135535.17:ENST00000310786.10:chr6:109370433:-	2132	-
chr6	109368855	109368856	ENSG00000135535.17:ENST00000310786.10:chr6:109368855:-	2132	-
chr6	109368859	109368860	ENSG00000135535.17:ENST00000310786.10:chr6:109368859:-	1132	-
chr6	109368862	109368863	ENSG00000135535.17:ENST00000310786.10:chr6:109368862:-	1132	-
chr6	109368886	109368887	ENSG00000135535.17:ENST00000310786.10:chr6:109368886:-	1132	-
chr6	109369001	109369002	ENSG00000135535.17:ENST00000310786.10:chr6:109369001:-	1132	-
chr7	44843293	44843294	ENSG00000105968.19:ENST00000308153.9:chr7:44843293:-	1250	-
chr7	44843299	44843300	ENSG00000105968.19:ENST00000308153.9:chr7:44843299:-	1250	-
chr7	44843319	44843320	ENSG00000105968.19:ENST00000308153.9:chr7:44843319:-	1250	-
chr7	44840902	44840903	ENSG00000105968.19:ENST00000308153.9:chr7:44840902:-	4250	-
chr7	44840977	44840978	ENSG00000105968.19:ENST00000308153.9:chr7:44840977:-	2250	-
chr7	44840985	44840986	ENSG00000105968.19:ENST00000308153.9:chr7:44840985:-	1250	-
chr7	44835555	44835556	ENSG00000105968.19:ENST00000308153.9:chr7:44835555:-	1250	-
chr7	44835580	44835581	ENSG00000105968.19:ENST00000308153.9:chr7:44835580:-	1250	-
chr7	44835595	44835596	ENSG00000105968.19:ENST00000308153.9:chr7:44835595:-	2250	-
chr7	44835597	44835598	ENSG00000105968.19:ENST00000308153.9:chr7:44835597:-	2250	-
chr7	44835605	44835606	ENSG00000105968.19:ENST00000308153.9:chr7:44835605:-	1250	-
chr7	44835632	44835633	ENSG00000105968.19:ENST00000308153.9:chr7:44835632:-	1250	-
chr7	44835648	44835649	ENSG00000105968.19:ENST00000308153.9:chr7:44835648:-	1250	-
chr7	44835654	44835655	ENSG00000105968.19:ENST00000308153.9:chr7:44835654:-	1250	-
chr7	44834507	44834508	ENSG00000105968.19:ENST00000308153.9:chr7:44834507:-	1250	-
chr7	44834517	44834518	ENSG00000105968.19:ENST00000308153.9:chr7:44834517:-	2250	-
chr7	44834535	44834536	ENSG00000105968.19:ENST00000308153.9:chr7:44834535:-	4250	-
chr7	44834537	44834538	ENSG00000105968.19:ENST00000308153.9:chr7:44834537:-	4250	-
chr7	44834542	44834543	ENSG00000105968.19:ENST00000308153.9:chr7:44834542:-	1250	-
chr7	66240595	66240596	ENSG00000169902.15:ENST00000304842.6:chr7:66240595:+	1,47	+
chr7	66240616	66240617	ENSG00000169902.15:ENST00000304842.6:chr7:66240616:+	1,47	+
chr7	66240737	66240738	ENSG00000169902.15:ENST00000304842.6:chr7:66240737:+	1,47	+
chr7	66241062	66241063	ENSG00000169902.15:ENST00000304842.6:chr7:66241062:+	1,46	+
chr7	66241153	66241154	ENSG00000169902.15:ENST00000304842.6:chr7:66241153:+	1,46	+
chr7	66241166	66241167	ENSG00000169902.15:ENST00000304842.6:chr7:66241166:+	2,47	+
chr7	66286666	66286667	ENSG00000169902.15:ENST00000304842.6:chr7:66286666:+	1,54	+
chr7	100582045	100582046	ENSG00000077454.16:ENST00000310300.11:chr7:100582045:-	1,72	-
chr7	100581842	100581843	ENSG00000077454.16:ENST00000310300.11:chr7:100581842:-	2,72	-
chr7	100581867	100581868	ENSG00000077454.16:ENST00000310300.11:chr7:100581867:-	1,72	-
chr7	100576306	100576307	ENSG00000077454.16:ENST00000310300.11:chr7:100576306:-	1,78	-
chr7	100575921	100575922	ENSG00000077454.16:ENST00000310300.11:chr7:100575921:-	1,78	-
chr7	100575127	100575128	ENSG00000077454.16:ENST00000310300.11:chr7:100575127:-	1,78	-
chr7	100575183	100575184	ENSG00000077454.16:ENST00000310300.11:chr7:100575183:-	1,78	-
chr8	22176178	22176179	ENSG00000168487.20:ENST00000306349.13:chr8:22176178:+	1,10	+
chr8	22176634	22176635	ENSG00000168487.20:ENST00000306349.13:chr8:22176634:+	1,10	+
chr8	22179721	22179722	ENSG00000168487.20:ENST00000306349.13:chr8:22179721:+	1,10	+
chr8	22192139	22192140	ENSG00000168487.20:ENST00000306349.13:chr8:22192139:+	1,10	+
chr8	22195546	22195547	ENSG00000168487.20:ENST00000306349.13:chr8:22195546:+	1,10	+
chr8	22247224	22247225	ENSG00000168495.13:ENST00000306433.9:chr8:22247224:+	1,65	+
chr8	22247901	22247902	ENSG00000168495.13:ENST00000306433.9:chr8:22247901:+	1,65	+
chr8	22247964	22247965	ENSG00000168495.13:ENST00000306433.9:chr8:22247964:+	1,65	+
chr8	22248511	22248512	ENSG00000168495.13:ENST00000306433.9:chr8:22248511:+	1,65	+
chr8	22249055	22249056	ENSG00000168495.13:ENST00000306433.9:chr8:22249055:+	1,65	+
chr8	22250117	22250118	ENSG00000168495.13:ENST00000306433.9:chr8:22250117:+	1,65	+
chr8	22250454	22250455	ENSG00000168495.13:ENST00000306433.9:chr8:22250454:+	1,65	+
chr8	22605809	22605810	ENSG00000158941.16:ENST00000308511.8:chr8:22605809:+	1,43	+
chr8	22606149	22606150	ENSG00000158941.16:ENST00000308511.8:chr8:22606149:+	1,44	+
chr8	22606959	22606960	ENSG00000158941.16:ENST00000308511.8:chr8:22606959:+	1,44	+
chr8	22608045	22608046	ENSG00000158941.16:ENST00000308511.8:chr8:22608045:+	1,44	+
chr8	22613022	22613023	ENSG00000158941.16:ENST00000308511.8:chr8:22613022:+	1,44	+
chr8	22613038	22613039	ENSG00000158941.16:ENST00000308511.8:chr8:22613038:+	1,44	+
chr8	22613091	22613092	ENSG00000158941.16:ENST00000308511.8:chr8:22613091:+	1,44	+
chr8	22614184	22614185	ENSG00000158941.16:ENST00000308511.8:chr8:22614184:+	1,44	+
chr8	22614235	22614236	ENSG00000158941.16:ENST00000308511.8:chr8:22614235:+	1,44	+
chr8	22614255	22614256	ENSG00000158941.16:ENST00000308511.8:chr8:22614255:+	1,44	+
chr8	22614400	22614401	ENSG00000158941.16:ENST00000308511.8:chr8:22614400:+	1,44	+
chr8	22615579	22615580	ENSG00000158941.16:ENST00000308511.8:chr8:22615579:+	1,44	+
chr8	22615694	22615695	ENSG00000158941.16:ENST00000308511.8:chr8:22615694:+	1,44	+
chr8	22615731	22615732	ENSG00000158941.16:ENST00000308511.8:chr8:22615731:+	1,43	+
chr8	22615746	22615747	ENSG00000158941.16:ENST00000308511.8:chr8:22615746:+	1,43	+
chr8	22616209	22616210	ENSG00000158941.16:ENST00000308511.8:chr8:22616209:+	1,43	+
chr8	22618419	22618420	ENSG00000158941.16:ENST00000308511.8:chr8:22618419:+	1,43	+
chr8	22618466	22618467	ENSG00000158941.16:ENST00000308511.8:chr8:22618466:+	1,43	+
chr8	22618947	22618948	ENSG00000158941.16:ENST00000308511.8:chr8:22618947:+	1,43	+
chr8	144379421	144379422	ENSG00000173137.12:ENST00000308860.11:chr8:144379421:+	1,14	+
chr8	144379486	144379487	ENSG00000173137.12:ENST00000308860.11:chr8:144379486:+	1,14	+
chr8	144383200	144383201	ENSG00000173137.12:ENST00000308860.11:chr8:144383200:+	1,14	+
chr8	144390703	144390704	ENSG00000173137.12:ENST00000308860.11:chr8:144390703:+	1,14	+
chr8	144390728	144390729	ENSG00000173137.12:ENST00000308860.11:chr8:144390728:+	1,14	+
chr8	144390935	144390936	ENSG00000173137.12:ENST00000308860.11:chr8:144390935:+	1,14	+
chr8	144390980	144390981	ENSG00000173137.12:ENST00000308860.11:chr8:144390980:+	1,15	+
chr8	144391368	144391369	ENSG00000173137.12:ENST00000308860.11:chr8:144391368:+	1,16	+
chr8	144391461	144391462	ENSG00000173137.12:ENST00000308860.11:chr8:144391461:+	1,16	+
chr8	144392140	144392141	ENSG00000173137.12:ENST00000308860.11:chr8:144392140:+	1,16	+
chr8	144392487	144392488	ENSG00000173137.12:ENST00000308860.11:chr8:144392487:+	1,16	+
chr8	144392515	144392516	ENSG00000173137.12:ENST00000308860.11:chr8:144392515:+	1,16	+
chr8	144392631	144392632	ENSG00000173137.12:ENST00000308860.11:chr8:144392631:+	2,16	+
chr8	144851070	144851071	ENSG00000170619.10:ENST00000305103.4:chr8:144851070:-	1,79	-
chr8	144851198	144851199	ENSG00000170619.10:ENST00000305103.4:chr8:144851198:-	1,79	-
chr8	144851220	144851221	ENSG00000170619.10:ENST00000305103.4:chr8:144851220:-	1,79	-
chr8	144851315	144851316	ENSG00000170619.10:ENST00000305103.4:chr8:144851315:-	1,79	-
chr9	128933813	128933814	ENSG00000175287.19:ENST00000308941.9:chr9:128933813:+	1,12	+
chr9	128940607	128940608	ENSG00000175287.19:ENST00000308941.9:chr9:128940607:+	1,12	+
chr9	128940700	128940701	ENSG00000175287.19:ENST00000308941.9:chr9:128940700:+	1,12	+
chr9	128941691	128941692	ENSG00000175287.19:ENST00000308941.9:chr9:128941691:+	1,12	+
chr10	70123927	70123928	ENSG00000042286.15:ENST00000307864.3:chr10:70123927:-	1135	-
chr10	70123473	70123474	ENSG00000042286.15:ENST00000307864.3:chr10:70123473:-	3135	-
chr10	70123479	70123480	ENSG00000042286.15:ENST00000307864.3:chr10:70123479:-	1135	-
chr10	70123495	70123496	ENSG00000042286.15:ENST00000307864.3:chr10:70123495:-	1135	-
chr10	70123500	70123501	ENSG00000042286.15:ENST00000307864.3:chr10:70123500:-	1135	-
chr10	70121103	70121104	ENSG00000042286.15:ENST00000307864.3:chr10:70121103:-	1135	-
chr10	70121160	70121161	ENSG00000042286.15:ENST00000307864.3:chr10:70121160:-	1135	-
chr10	70121170	70121171	ENSG00000042286.15:ENST00000307864.3:chr10:70121170:-	1135	-
chr10	70121179	70121180	ENSG00000042286.15:ENST00000307864.3:chr10:70121179:-	1135	-
chr10	70121203	70121204	ENSG00000042286.15:ENST00000307864.3:chr10:70121203:-	1135	-
chr10	70117835	70117836	ENSG00000042286.15:ENST00000307864.3:chr10:70117835:-	1135	-
chr10	70117842	70117843	ENSG00000042286.15:ENST00000307864.3:chr10:70117842:-	1135	-
chr10	70117884	70117885	ENSG00000042286.15:ENST00000307864.3:chr10:70117884:-	1135	-
chr10	70117907	70117908	ENSG00000042286.15:ENST00000307864.3:chr10:70117907:-	2135	-
chr10	70116667	70116668	ENSG00000042286.15:ENST00000307864.3:chr10:70116667:-	1135	-
chr10	70116669	70116670	ENSG00000042286.15:ENST00000307864.3:chr10:70116669:-	1135	-
chr10	70116679	70116680	ENSG00000042286.15:ENST00000307864.3:chr10:70116679:-	1135	-
chr10	70116703	70116704	ENSG00000042286.15:ENST00000307864.3:chr10:70116703:-	2135	-
chr10	70116711	70116712	ENSG00000042286.15:ENST00000307864.3:chr10:70116711:-	1135	-
chr10	70114935	70114936	ENSG00000042286.15:ENST00000307864.3:chr10:70114935:-	1135	-
chr10	70114937	70114938	ENSG00000042286.15:ENST00000307864.3:chr10:70114937:-	1135	-
chr10	70115004	70115005	ENSG00000042286.15:ENST00000307864.3:chr10:70115004:-	1135	-
chr10	70115034	70115035	ENSG00000042286.15:ENST00000307864.3:chr10:70115034:-	1135	-
chr10	70115058	70115059	ENSG00000042286.15:ENST00000307864.3:chr10:70115058:-	1135	-
chr10	70115111	70115112	ENSG00000042286.15:ENST00000307864.3:chr10:70115111:-	3135	-
chr10	70114276	70114277	ENSG00000042286.15:ENST00000307864.3:chr10:70114276:-	1135	-
chr11	450458	450459	ENSG00000174915.12:ENST00000308020.6:chr11:450458:+	1127	+
chr11	450501	450502	ENSG00000174915.12:ENST00000308020.6:chr11:450501:+	1129	+
chr11	450510	450511	ENSG00000174915.12:ENST00000308020.6:chr11:450510:+	1130	+
chr11	450552	450553	ENSG00000174915.12:ENST00000308020.6:chr11:450552:+	1130	+
chr11	450567	450568	ENSG00000174915.12:ENST00000308020.6:chr11:450567:+	1130	+
chr11	450583	450584	ENSG00000174915.12:ENST00000308020.6:chr11:450583:+	1130	+
chr11	450600	450601	ENSG00000174915.12:ENST00000308020.6:chr11:450600:+	1131	+
chr11	450601	450602	ENSG00000174915.12:ENST00000308020.6:chr11:450601:+	1131	+
chr11	450610	450611	ENSG00000174915.12:ENST00000308020.6:chr11:450610:+	1131	+
chr11	450613	450614	ENSG00000174915.12:ENST00000308020.6:chr11:450613:+	2131	+
chr11	450621	450622	ENSG00000174915.12:ENST00000308020.6:chr11:450621:+	1130	+
chr11	460191	460192	ENSG00000174915.12:ENST00000308020.6:chr11:460191:+	1131	+
chr11	460195	460196	ENSG00000174915.12:ENST00000308020.6:chr11:460195:+	1132	+
chr11	460227	460228	ENSG00000174915.12:ENST00000308020.6:chr11:460227:+	2132	+
chr11	460267	460268	ENSG00000174915.12:ENST00000308020.6:chr11:460267:+	1132	+
chr11	473973	473974	ENSG00000174915.12:ENST00000308020.6:chr11:473973:+	1133	+
chr11	479118	479119	ENSG00000174915.12:ENST00000308020.6:chr11:479118:+	2133	+
chr11	479121	479122	ENSG00000174915.12:ENST00000308020.6:chr11:479121:+	2133	+
chr11	479133	479134	ENSG00000174915.12:ENST00000308020.6:chr11:479133:+	1133	+
chr11	479136	479137	ENSG00000174915.12:ENST00000308020.6:chr11:479136:+	1133	+
chr11	479143	479144	ENSG00000174915.12:ENST00000308020.6:chr11:479143:+	1133	+
chr11	486995	486996	ENSG00000174915.12:ENST00000308020.6:chr11:486995:+	1133	+
chr11	486998	486999	ENSG00000174915.12:ENST00000308020.6:chr11:486998:+	1133	+
chr11	487050	487051	ENSG00000174915.12:ENST00000308020.6:chr11:487050:+	1134	+
chr11	488287	488288	ENSG00000174915.12:ENST00000308020.6:chr11:488287:+	2134	+
chr11	488311	488312	ENSG00000174915.12:ENST00000308020.6:chr11:488311:+	2134	+
chr11	488575	488576	ENSG00000174915.12:ENST00000308020.6:chr11:488575:+	1143	+
chr11	488632	488633	ENSG00000174915.12:ENST00000308020.6:chr11:488632:+	1143	+
chr11	489613	489614	ENSG00000174915.12:ENST00000308020.6:chr11:489613:+	1145	+
chr11	489652	489653	ENSG00000174915.12:ENST00000308020.6:chr11:489652:+	1146	+
chr11	489676	489677	ENSG00000174915.12:ENST00000308020.6:chr11:489676:+	4146	+
chr11	489712	489713	ENSG00000174915.12:ENST00000308020.6:chr11:489712:+	1147	+
chr11	489951	489952	ENSG00000174915.12:ENST00000308020.6:chr11:489951:+	1148	+
chr11	489966	489967	ENSG00000174915.12:ENST00000308020.6:chr11:489966:+	1147	+
chr11	490002	490003	ENSG00000174915.12:ENST00000308020.6:chr11:490002:+	1148	+
chr11	490023	490024	ENSG00000174915.12:ENST00000308020.6:chr11:490023:+	1148	+
chr11	490025	490026	ENSG00000174915.12:ENST00000308020.6:chr11:490025:+	1148	+
chr11	490040	490041	ENSG00000174915.12:ENST00000308020.6:chr11:490040:+	1148	+
chr11	490046	490047	ENSG00000174915.12:ENST00000308020.6:chr11:490046:+	2148	+
chr11	490059	490060	ENSG00000174915.12:ENST00000308020.6:chr11:490059:+	1148	+
chr11	490437	490438	ENSG00000174915.12:ENST00000308020.6:chr11:490437:+	1148	+
chr11	490530	490531	ENSG00000174915.12:ENST00000308020.6:chr11:490530:+	2149	+
chr11	490567	490568	ENSG00000174915.12:ENST00000308020.6:chr11:490567:+	1149	+
chr11	490574	490575	ENSG00000174915.12:ENST00000308020.6:chr11:490574:+	1149	+
chr11	490578	490579	ENSG00000174915.12:ENST00000308020.6:chr11:490578:+	1149	+
chr11	8953258	8953259	ENSG00000175348.11:ENST00000309134.9:chr11:8953258:-	1,43	-
chr11	64242404	64242405	ENSG00000173486.14:ENST00000309366.9:chr11:64242404:+	1,80	+
chr11	64242415	64242416	ENSG00000173486.14:ENST00000309366.9:chr11:64242415:+	1,81	+
chr11	64242420	64242421	ENSG00000173486.14:ENST00000309366.9:chr11:64242420:+	1,81	+
chr11	64242437	64242438	ENSG00000173486.14:ENST00000309366.9:chr11:64242437:+	2,81	+
chr11	64242523	64242524	ENSG00000173486.14:ENST00000309366.9:chr11:64242523:+	1,81	+
chr11	64242545	64242546	ENSG00000173486.14:ENST00000309366.9:chr11:64242545:+	2,81	+
chr11	64243271	64243272	ENSG00000173486.14:ENST00000309366.9:chr11:64243271:+	2,81	+
chr11	64243281	64243282	ENSG00000173486.14:ENST00000309366.9:chr11:64243281:+	1,81	+
chr11	64243483	64243484	ENSG00000173486.14:ENST00000309366.9:chr11:64243483:+	1,81	+
chr11	64243973	64243974	ENSG00000173486.14:ENST00000309366.9:chr11:64243973:+	1,81	+
chr11	64244014	64244015	ENSG00000173486.14:ENST00000309366.9:chr11:64244014:+	1,81	+
chr11	64244023	64244024	ENSG00000173486.14:ENST00000309366.9:chr11:64244023:+	2,81	+
chr11	65571527	65571528	ENSG00000173465.8:ENST00000309328.8:chr11:65571527:+	2,51	+
chr11	65571548	65571549	ENSG00000173465.8:ENST00000309328.8:chr11:65571548:+	1,51	+
chr11	65571573	65571574	ENSG00000173465.8:ENST00000309328.8:chr11:65571573:+	1,51	+
chr11	65571591	65571592	ENSG00000173465.8:ENST00000309328.8:chr11:65571591:+	3,51	+
chr11	65571618	65571619	ENSG00000173465.8:ENST00000309328.8:chr11:65571618:+	2,51	+
chr11	65571660	65571661	ENSG00000173465.8:ENST00000309328.8:chr11:65571660:+	1,51	+
chr11	65571730	65571731	ENSG00000173465.8:ENST00000309328.8:chr11:65571730:+	1,51	+
chr11	65661958	65661959	ENSG00000173039.19:ENST00000308639.13:chr11:65661958:-	1,19	-
chr11	65659669	65659670	ENSG00000173039.19:ENST00000308639.13:chr11:65659669:-	1,19	-
chr11	65659723	65659724	ENSG00000173039.19:ENST00000308639.13:chr11:65659723:-	1,19	-
chr11	65862032	65862033	ENSG00000172732.12:ENST00000308110.9:chr11:65862032:+	1107	+
chr11	65862491	65862492	ENSG00000172732.12:ENST00000308110.9:chr11:65862491:+	1107	+
chr11	65863633	65863634	ENSG00000172732.12:ENST00000308110.9:chr11:65863633:+	1107	+
chr11	65863703	65863704	ENSG00000172732.12:ENST00000308110.9:chr11:65863703:+	2107	+
chr11	65864589	65864590	ENSG00000172732.12:ENST00000308110.9:chr11:65864589:+	1107	+
chr11	65864789	65864790	ENSG00000172732.12:ENST00000308110.9:chr11:65864789:+	1107	+
chr11	65865025	65865026	ENSG00000172732.12:ENST00000308110.9:chr11:65865025:+	1107	+
chr11	65865132	65865133	ENSG00000172732.12:ENST00000308110.9:chr11:65865132:+	1107	+
chr11	65865303	65865304	ENSG00000172732.12:ENST00000308110.9:chr11:65865303:+	1107	+
chr11	65865308	65865309	ENSG00000172732.12:ENST00000308110.9:chr11:65865308:+	1107	+
chr11	65866047	65866048	ENSG00000172732.12:ENST00000308110.9:chr11:65866047:+	1107	+
chr11	66668809	66668810	ENSG00000173914.12:ENST00000310046.9:chr11:66668809:-	1,23	-
chr11	66668819	66668820	ENSG00000173914.12:ENST00000310046.9:chr11:66668819:-	1,23	-
chr11	66669024	66669025	ENSG00000173914.12:ENST00000310046.9:chr11:66669024:-	1,22	-
chr11	66669067	66669068	ENSG00000173914.12:ENST00000310046.9:chr11:66669067:-	1,23	-
chr11	66843790	66843791	ENSG00000173653.8:ENST00000309657.8:chr11:66843790:+	1,99	+
chr11	66844893	66844894	ENSG00000173653.8:ENST00000309657.8:chr11:66844893:+	1,99	+
chr11	66844926	66844927	ENSG00000173653.8:ENST00000309657.8:chr11:66844926:+	1,99	+
chr11	66845012	66845013	ENSG00000173653.8:ENST00000309657.8:chr11:66845012:+	1,99	+
chr11	66845226	66845227	ENSG00000173653.8:ENST00000309657.8:chr11:66845226:+	1,99	+
chr11	66845527	66845528	ENSG00000173653.8:ENST00000309657.8:chr11:66845527:+	1,99	+
chr11	66845536	66845537	ENSG00000173653.8:ENST00000309657.8:chr11:66845536:+	2,99	+
chr11	66845538	66845539	ENSG00000173653.8:ENST00000309657.8:chr11:66845538:+	1,99	+
chr11	66845902	66845903	ENSG00000173653.8:ENST00000309657.8:chr11:66845902:+	1,99	+
chr11	66845996	66845997	ENSG00000173653.8:ENST00000309657.8:chr11:66845996:+	1,99	+
chr11	66846070	66846071	ENSG00000173653.8:ENST00000309657.8:chr11:66846070:+	2,99	+
chr11	73720894	73720895	ENSG00000175582.20:ENST00000310653.10:chr11:73720894:-	1,42	-
chr11	73718841	73718842	ENSG00000175582.20:ENST00000310653.10:chr11:73718841:-	1,42	-
chr11	73679703	73679704	ENSG00000175582.20:ENST00000310653.10:chr11:73679703:-	1,42	-
chr11	73805043	73805044	ENSG00000175581.14:ENST00000310614.12:chr11:73805043:+	1,63	+
chr11	73805071	73805072	ENSG00000175581.14:ENST00000310614.12:chr11:73805071:+	1,63	+
chr11	73825730	73825731	ENSG00000175581.14:ENST00000310614.12:chr11:73825730:+	1,63	+
chr11	73825743	73825744	ENSG00000175581.14:ENST00000310614.12:chr11:73825743:+	1,63	+
chr11	73844884	73844885	ENSG00000175581.14:ENST00000310614.12:chr11:73844884:+	1,63	+
chr11	73844891	73844892	ENSG00000175581.14:ENST00000310614.12:chr11:73844891:+	1,63	+
chr11	73844937	73844938	ENSG00000175581.14:ENST00000310614.12:chr11:73844937:+	1,63	+
chr11	73859989	73859990	ENSG00000175581.14:ENST00000310614.12:chr11:73859989:+	2,63	+
chr11	73863190	73863191	ENSG00000175581.14:ENST00000310614.12:chr11:73863190:+	1,63	+
chr11	73864297	73864298	ENSG00000175581.14:ENST00000310614.12:chr11:73864297:+	2,63	+
chr11	73864340	73864341	ENSG00000175581.14:ENST00000310614.12:chr11:73864340:+	1,63	+
chr12	6770398	6770399	ENSG00000159335.18:ENST00000309083.8:chr12:6770398:+	1188	+
chr13	52653078	52653079	ENSG00000165416.15:ENST00000310528.9:chr13:52653078:+	1,28	+
chr13	52659228	52659229	ENSG00000165416.15:ENST00000310528.9:chr13:52659228:+	1,30	+
chr13	52665653	52665654	ENSG00000165416.15:ENST00000310528.9:chr13:52665653:+	2,30	+
chr13	52665661	52665662	ENSG00000165416.15:ENST00000310528.9:chr13:52665661:+	1,30	+
chr13	52666859	52666860	ENSG00000165416.15:ENST00000310528.9:chr13:52666859:+	1,31	+
chr13	52666874	52666875	ENSG00000165416.15:ENST00000310528.9:chr13:52666874:+	1,31	+
chr13	52666883	52666884	ENSG00000165416.15:ENST00000310528.9:chr13:52666883:+	1,31	+
chr13	52676307	52676308	ENSG00000165416.15:ENST00000310528.9:chr13:52676307:+	1,32	+
chr13	52679983	52679984	ENSG00000165416.15:ENST00000310528.9:chr13:52679983:+	1,32	+
chr13	52680009	52680010	ENSG00000165416.15:ENST00000310528.9:chr13:52680009:+	1,32	+
chr13	52680134	52680135	ENSG00000165416.15:ENST00000310528.9:chr13:52680134:+	1,31	+
chr13	52687831	52687832	ENSG00000165416.15:ENST00000310528.9:chr13:52687831:+	1,31	+
chr14	45246833	45246834	ENSG00000129534.14:ENST00000310806.9:chr14:45246833:-	1,29	-
chr14	45247048	45247049	ENSG00000129534.14:ENST00000310806.9:chr14:45247048:-	1,27	-
chr14	45237685	45237686	ENSG00000129534.14:ENST00000310806.9:chr14:45237685:-	1,30	-
chr14	45224437	45224438	ENSG00000129534.14:ENST00000310806.9:chr14:45224437:-	1,20	-
chr14	45224742	45224743	ENSG00000129534.14:ENST00000310806.9:chr14:45224742:-	1,21	-
chr15	45402539	45402540	ENSG00000171763.20:ENST00000305560.11:chr15:45402539:+	1,7	+
chr15	45402595	45402596	ENSG00000171763.20:ENST00000305560.11:chr15:45402595:+	1,7	+
chr15	45403058	45403059	ENSG00000171763.20:ENST00000305560.11:chr15:45403058:+	1,10	+
chr15	45403108	45403109	ENSG00000171763.20:ENST00000305560.11:chr15:45403108:+	1,10	+
chr15	45403302	45403303	ENSG00000171763.20:ENST00000305560.11:chr15:45403302:+	1,10	+
chr15	75913245	75913246	ENSG00000167196.14:ENST00000308275.8:chr15:75913245:+	1,92	+
chr15	75913255	75913256	ENSG00000167196.14:ENST00000308275.8:chr15:75913255:+	1,92	+
chr15	75914133	75914134	ENSG00000167196.14:ENST00000308275.8:chr15:75914133:+	1,92	+
chr15	75914165	75914166	ENSG00000167196.14:ENST00000308275.8:chr15:75914165:+	1,92	+
chr15	75914191	75914192	ENSG00000167196.14:ENST00000308275.8:chr15:75914191:+	1,92	+
chr15	75917364	75917365	ENSG00000167196.14:ENST00000308275.8:chr15:75917364:+	2,92	+
chr15	75917383	75917384	ENSG00000167196.14:ENST00000308275.8:chr15:75917383:+	1,92	+
chr15	75929903	75929904	ENSG00000167196.14:ENST00000308275.8:chr15:75929903:+	1,92	+
chr15	75930039	75930040	ENSG00000167196.14:ENST00000308275.8:chr15:75930039:+	1,92	+
chr15	75932721	75932722	ENSG00000167196.14:ENST00000308275.8:chr15:75932721:+	2,92	+
chr15	75932768	75932769	ENSG00000167196.14:ENST00000308275.8:chr15:75932768:+	1,92	+
chr15	75932791	75932792	ENSG00000167196.14:ENST00000308275.8:chr15:75932791:+	1,92	+
chr15	75932883	75932884	ENSG00000167196.14:ENST00000308275.8:chr15:75932883:+	1,92	+
chr15	75932891	75932892	ENSG00000167196.14:ENST00000308275.8:chr15:75932891:+	1,92	+
chr15	75932960	75932961	ENSG00000167196.14:ENST00000308275.8:chr15:75932960:+	1,92	+
chr15	75933051	75933052	ENSG00000167196.14:ENST00000308275.8:chr15:75933051:+	1,92	+
chr15	75933075	75933076	ENSG00000167196.14:ENST00000308275.8:chr15:75933075:+	1,92	+
chr15	89276726	89276727	ENSG00000140525.19:ENST00000310775.12:chr15:89276726:+	1,4	+
chr15	89292846	89292847	ENSG00000140525.19:ENST00000310775.12:chr15:89292846:+	1,4	+
chr16	647437	647438	ENSG00000172366.20:ENST00000307650.9:chr16:647437:+	1,29	+
chr16	647469	647470	ENSG00000172366.20:ENST00000307650.9:chr16:647469:+	1,29	+
chr16	648135	648136	ENSG00000172366.20:ENST00000307650.9:chr16:648135:+	1,29	+
chr16	23452931	23452932	ENSG00000168434.13:ENST00000307149.10:chr16:23452931:-	1,15	-
chr16	23442628	23442629	ENSG00000168434.13:ENST00000307149.10:chr16:23442628:-	1,15	-
chr16	23424755	23424756	ENSG00000168434.13:ENST00000307149.10:chr16:23424755:-	1,15	-
chr16	23410337	23410338	ENSG00000168434.13:ENST00000307149.10:chr16:23410337:-	1,15	-
chr16	23403735	23403736	ENSG00000168434.13:ENST00000307149.10:chr16:23403735:-	1,15	-
chr16	23393335	23393336	ENSG00000168434.13:ENST00000307149.10:chr16:23393335:-	1,15	-
chr16	29901057	29901058	ENSG00000174939.11:ENST00000308748.10:chr16:29901057:+	1,13	+
chr16	29901190	29901191	ENSG00000174939.11:ENST00000308748.10:chr16:29901190:+	1,13	+
chr16	29901252	29901253	ENSG00000174939.11:ENST00000308748.10:chr16:29901252:+	1,13	+
chr16	29901276	29901277	ENSG00000174939.11:ENST00000308748.10:chr16:29901276:+	1,13	+
chr16	29901893	29901894	ENSG00000174939.11:ENST00000308748.10:chr16:29901893:+	1,13	+
chr16	29905872	29905873	ENSG00000174939.11:ENST00000308748.10:chr16:29905872:+	1,13	+
chr16	29905892	29905893	ENSG00000174939.11:ENST00000308748.10:chr16:29905892:+	1,13	+
chr16	56626487	56626488	ENSG00000169715.15:ENST00000306061.10:chr16:56626487:+	2,99	+
chr16	56626931	56626932	ENSG00000169715.15:ENST00000306061.10:chr16:56626931:+	1,99	+
chr16	56748305	56748306	ENSG00000102900.13:ENST00000308159.10:chr16:56748305:+	1162	+
chr16	56748342	56748343	ENSG00000102900.13:ENST00000308159.10:chr16:56748342:+	1162	+
chr16	56748346	56748347	ENSG00000102900.13:ENST00000308159.10:chr16:56748346:+	1162	+
chr16	56758556	56758557	ENSG00000102900.13:ENST00000308159.10:chr16:56758556:+	1162	+
chr16	56758576	56758577	ENSG00000102900.13:ENST00000308159.10:chr16:56758576:+	1162	+
chr16	56758581	56758582	ENSG00000102900.13:ENST00000308159.10:chr16:56758581:+	1162	+
[truncated: 127,742 more rows]

## Sheet: CoCl2_rep2
chr1	155679409	155679410	ENSG00000163374.20:ENST00000355499.9:chr1:155679409:-	1,37	-
chr1	155676651	155676652	ENSG00000163374.20:ENST00000355499.9:chr1:155676651:-	1,37	-
chr1	155672608	155672609	ENSG00000163374.20:ENST00000355499.9:chr1:155672608:-	1,37	-
chr1	155672667	155672668	ENSG00000163374.20:ENST00000355499.9:chr1:155672667:-	1,37	-
chr3	100748402	100748403	ENSG00000114354.15:ENST00000675243.1:chr3:100748402:+	1,2	+
chr3	100748506	100748507	ENSG00000114354.15:ENST00000675243.1:chr3:100748506:+	1,2	+
chr4	82842380	82842381	ENSG00000138674.17:ENST00000443462.6:chr4:82842380:-	1,1	-
chr5	150357776	150357777	ENSG00000070814.22:ENST00000650162.1:chr5:150357776:+	1,10	+
chr5	150369595	150369596	ENSG00000070814.22:ENST00000650162.1:chr5:150369595:+	1,10	+
chr5	150375011	150375012	ENSG00000070814.22:ENST00000650162.1:chr5:150375011:+	1,10	+
chr5	150375050	150375051	ENSG00000070814.22:ENST00000650162.1:chr5:150375050:+	1,10	+
chr5	150390020	150390021	ENSG00000070814.22:ENST00000650162.1:chr5:150390020:+	1,10	+
chr5	150392041	150392042	ENSG00000070814.22:ENST00000650162.1:chr5:150392041:+	1,10	+
chr5	150396495	150396496	ENSG00000070814.22:ENST00000650162.1:chr5:150396495:+	1,10	+
chr6	73466242	73466243	ENSG00000135297.17:ENST00000680686.1:chr6:73466242:+	1,11	+
chr8	143586738	143586739	ENSG00000104529.18:ENST00000529272.5:chr8:143586738:-	1,12	-
chr8	143586744	143586745	ENSG00000104529.18:ENST00000529272.5:chr8:143586744:-	1,12	-
chr8	143586239	143586240	ENSG00000104529.18:ENST00000529272.5:chr8:143586239:-	1,12	-
chr8	143580511	143580512	ENSG00000104529.18:ENST00000529272.5:chr8:143580511:-	1,12	-
chr9	32984714	32984715	ENSG00000137074.20:ENST00000476858.6:chr9:32984714:-	1,4	-
chr10	133302807	133302808	ENSG00000130640.15:ENST00000252936.8:chr10:133302807:-	1102	-
chr10	133302836	133302837	ENSG00000130640.15:ENST00000252936.8:chr10:133302836:-	1102	-
chr10	133302904	133302905	ENSG00000130640.15:ENST00000252936.8:chr10:133302904:-	1102	-
chr10	133299997	133299998	ENSG00000130640.15:ENST00000252936.8:chr10:133299997:-	1102	-
chr10	133300055	133300056	ENSG00000130640.15:ENST00000252936.8:chr10:133300055:-	3102	-
chr10	133299439	133299440	ENSG00000130640.15:ENST00000252936.8:chr10:133299439:-	1102	-
chr10	133299445	133299446	ENSG00000130640.15:ENST00000252936.8:chr10:133299445:-	3102	-
chr10	133299596	133299597	ENSG00000130640.15:ENST00000252936.8:chr10:133299596:-	1102	-
chr10	133299601	133299602	ENSG00000130640.15:ENST00000252936.8:chr10:133299601:-	2102	-
chr10	133298003	133298004	ENSG00000130640.15:ENST00000252936.8:chr10:133298003:-	1102	-
chr10	133298014	133298015	ENSG00000130640.15:ENST00000252936.8:chr10:133298014:-	1102	-
chr10	133293573	133293574	ENSG00000130640.15:ENST00000252936.8:chr10:133293573:-	1102	-
chr10	133293602	133293603	ENSG00000130640.15:ENST00000252936.8:chr10:133293602:-	1102	-
chr10	133293651	133293652	ENSG00000130640.15:ENST00000252936.8:chr10:133293651:-	1102	-
chr10	133293081	133293082	ENSG00000130640.15:ENST00000252936.8:chr10:133293081:-	1103	-
chr10	133293103	133293104	ENSG00000130640.15:ENST00000252936.8:chr10:133293103:-	1103	-
chr10	133293139	133293140	ENSG00000130640.15:ENST00000252936.8:chr10:133293139:-	1103	-
chr10	133292541	133292542	ENSG00000130640.15:ENST00000252936.8:chr10:133292541:-	1103	-
chr10	133292551	133292552	ENSG00000130640.15:ENST00000252936.8:chr10:133292551:-	1103	-
chr10	133292573	133292574	ENSG00000130640.15:ENST00000252936.8:chr10:133292573:-	2103	-
chr10	133292605	133292606	ENSG00000130640.15:ENST00000252936.8:chr10:133292605:-	1103	-
chr10	133292641	133292642	ENSG00000130640.15:ENST00000252936.8:chr10:133292641:-	1103	-
chr10	133292651	133292652	ENSG00000130640.15:ENST00000252936.8:chr10:133292651:-	1103	-
chr10	133292674	133292675	ENSG00000130640.15:ENST00000252936.8:chr10:133292674:-	2103	-
chr10	133289839	133289840	ENSG00000130640.15:ENST00000252936.8:chr10:133289839:-	1103	-
chr10	133289896	133289897	ENSG00000130640.15:ENST00000252936.8:chr10:133289896:-	1103	-
chr10	133289914	133289915	ENSG00000130640.15:ENST00000252936.8:chr10:133289914:-	1103	-
chr10	133288898	133288899	ENSG00000130640.15:ENST00000252936.8:chr10:133288898:-	1103	-
chr10	133288901	133288902	ENSG00000130640.15:ENST00000252936.8:chr10:133288901:-	1103	-
chr10	133288155	133288156	ENSG00000130640.15:ENST00000252936.8:chr10:133288155:-	1103	-
chr10	133288212	133288213	ENSG00000130640.15:ENST00000252936.8:chr10:133288212:-	1103	-
chr10	133288290	133288291	ENSG00000130640.15:ENST00000252936.8:chr10:133288290:-	1103	-
chr10	133285463	133285464	ENSG00000130640.15:ENST00000252936.8:chr10:133285463:-	1103	-
chr10	133285470	133285471	ENSG00000130640.15:ENST00000252936.8:chr10:133285470:-	1103	-
chr10	133285500	133285501	ENSG00000130640.15:ENST00000252936.8:chr10:133285500:-	2103	-
chr10	133285607	133285608	ENSG00000130640.15:ENST00000252936.8:chr10:133285607:-	1103	-
chr10	133285158	133285159	ENSG00000130640.15:ENST00000252936.8:chr10:133285158:-	1103	-
chr10	133285176	133285177	ENSG00000130640.15:ENST00000252936.8:chr10:133285176:-	1103	-
chr10	133283941	133283942	ENSG00000130640.15:ENST00000252936.8:chr10:133283941:-	1103	-
chr10	133283962	133283963	ENSG00000130640.15:ENST00000252936.8:chr10:133283962:-	1103	-
chr10	133283982	133283983	ENSG00000130640.15:ENST00000252936.8:chr10:133283982:-	1103	-
chr10	133283984	133283985	ENSG00000130640.15:ENST00000252936.8:chr10:133283984:-	1103	-
chr10	133283986	133283987	ENSG00000130640.15:ENST00000252936.8:chr10:133283986:-	1103	-
chr10	133283090	133283091	ENSG00000130640.15:ENST00000252936.8:chr10:133283090:-	1103	-
chr10	133283173	133283174	ENSG00000130640.15:ENST00000252936.8:chr10:133283173:-	1103	-
chr10	133283188	133283189	ENSG00000130640.15:ENST00000252936.8:chr10:133283188:-	3103	-
chr10	133283206	133283207	ENSG00000130640.15:ENST00000252936.8:chr10:133283206:-	1103	-
chr10	133282285	133282286	ENSG00000130640.15:ENST00000252936.8:chr10:133282285:-	1103	-
chr10	133282334	133282335	ENSG00000130640.15:ENST00000252936.8:chr10:133282334:-	2103	-
chr10	133281304	133281305	ENSG00000130640.15:ENST00000252936.8:chr10:133281304:-	2103	-
chr10	133281356	133281357	ENSG00000130640.15:ENST00000252936.8:chr10:133281356:-	1103	-
chr10	133281367	133281368	ENSG00000130640.15:ENST00000252936.8:chr10:133281367:-	2103	-
chr10	133281376	133281377	ENSG00000130640.15:ENST00000252936.8:chr10:133281376:-	1103	-
chr10	133281391	133281392	ENSG00000130640.15:ENST00000252936.8:chr10:133281391:-	1103	-
chr10	133281415	133281416	ENSG00000130640.15:ENST00000252936.8:chr10:133281415:-	1103	-
chr10	133279770	133279771	ENSG00000130640.15:ENST00000252936.8:chr10:133279770:-	1103	-
chr11	62856326	62856327	ENSG00000168003.18:ENST00000377891.6:chr11:62856326:+	1,9	+
chr11	62871579	62871580	ENSG00000168003.18:ENST00000377891.6:chr11:62871579:+	1,9	+
chr11	62871589	62871590	ENSG00000168003.18:ENST00000377891.6:chr11:62871589:+	1,9	+
chr11	62876846	62876847	ENSG00000168003.18:ENST00000377891.6:chr11:62876846:+	1,10	+
chr11	62884497	62884498	ENSG00000168003.18:ENST00000377891.6:chr11:62884497:+	1,10	+
chr11	62888584	62888585	ENSG00000168003.18:ENST00000377891.6:chr11:62888584:+	1,10	+
chr15	60349098	60349099	ENSG00000182718.18:ENST00000559956.6:chr15:60349098:-	1,21	-
chr17	42333684	42333685	ENSG00000168610.16:ENST00000264657.10:chr17:42333684:-	1,11	-
chr17	42329574	42329575	ENSG00000168610.16:ENST00000264657.10:chr17:42329574:-	1,11	-
chr17	42324971	42324972	ENSG00000168610.16:ENST00000264657.10:chr17:42324971:-	1,11	-
chr17	42324766	42324767	ENSG00000168610.16:ENST00000264657.10:chr17:42324766:-	1,11	-
chr17	42316876	42316877	ENSG00000168610.16:ENST00000264657.10:chr17:42316876:-	1,11	-
chr17	81899986	81899987	ENSG00000141552.18:ENST00000572851.6:chr17:81899986:+	1,7	+
chr19	40695994	40695995	ENSG00000123815.13:ENST00000324464.8:chr19:40695994:-	1,1	-
chr20	31721792	31721793	ENSG00000171552.14:ENST00000676582.1:chr20:31721792:-	1430	-
chr20	31721857	31721858	ENSG00000171552.14:ENST00000676582.1:chr20:31721857:-	1431	-
chr20	31721889	31721890	ENSG00000171552.14:ENST00000676582.1:chr20:31721889:-	1431	-
chr20	31721892	31721893	ENSG00000171552.14:ENST00000676582.1:chr20:31721892:-	1431	-
chr20	31722012	31722013	ENSG00000171552.14:ENST00000676582.1:chr20:31722012:-	1431	-
chr20	31722014	31722015	ENSG00000171552.14:ENST00000676582.1:chr20:31722014:-	1431	-
chr20	31722075	31722076	ENSG00000171552.14:ENST00000676582.1:chr20:31722075:-	1431	-
chr20	31722169	31722170	ENSG00000171552.14:ENST00000676582.1:chr20:31722169:-	1431	-
chr20	31722211	31722212	ENSG00000171552.14:ENST00000676582.1:chr20:31722211:-	1431	-
chr20	31665977	31665978	ENSG00000171552.14:ENST00000676582.1:chr20:31665977:-	1431	-
chr20	31665994	31665995	ENSG00000171552.14:ENST00000676582.1:chr20:31665994:-	1431	-
chr20	31665999	31666000	ENSG00000171552.14:ENST00000676582.1:chr20:31665999:-	1431	-
chr20	31666003	31666004	ENSG00000171552.14:ENST00000676582.1:chr20:31666003:-	1431	-
chr20	31666041	31666042	ENSG00000171552.14:ENST00000676582.1:chr20:31666041:-	1431	-
chr20	31666081	31666082	ENSG00000171552.14:ENST00000676582.1:chr20:31666081:-	4431	-
chr20	45891573	45891574	ENSG00000064601.21:ENST00000191018.9:chr20:45891573:+	1,64	+
chr20	45892304	45892305	ENSG00000064601.21:ENST00000191018.9:chr20:45892304:+	1,64	+
chr20	45892425	45892426	ENSG00000064601.21:ENST00000191018.9:chr20:45892425:+	1,64	+
chr20	45893290	45893291	ENSG00000064601.21:ENST00000191018.9:chr20:45893290:+	1,64	+
chr20	45894680	45894681	ENSG00000064601.21:ENST00000191018.9:chr20:45894680:+	1,64	+
chr20	45894880	45894881	ENSG00000064601.21:ENST00000191018.9:chr20:45894880:+	1,64	+
chr20	45895073	45895074	ENSG00000064601.21:ENST00000191018.9:chr20:45895073:+	1,64	+
chr20	45895113	45895114	ENSG00000064601.21:ENST00000191018.9:chr20:45895113:+	1,64	+
chr20	45898438	45898439	ENSG00000064601.21:ENST00000191018.9:chr20:45898438:+	1,64	+
chr20	56386343	56386344	ENSG00000087586.18:ENST00000347343.6:chr20:56386343:-	1,73	-
chr20	56386391	56386392	ENSG00000087586.18:ENST00000347343.6:chr20:56386391:-	1,73	-
chr20	58898955	58898956	ENSG00000087460.29:ENST00000354359.12:chr20:58898955:+	1,50	+
chr20	58910003	58910004	ENSG00000087460.29:ENST00000354359.12:chr20:58910003:+	1,50	+
chr11	95067282	95067283	ENSG00000263465.5:ENST00000587424.3:chr11:95067282:+	1,44	+
chr11	95067621	95067622	ENSG00000263465.5:ENST00000587424.3:chr11:95067621:+	1,55	+
chr11	95067720	95067721	ENSG00000263465.5:ENST00000587424.3:chr11:95067720:+	2,56	+
chr11	95067810	95067811	ENSG00000263465.5:ENST00000587424.3:chr11:95067810:+	1,56	+
chr11	95067825	95067826	ENSG00000263465.5:ENST00000587424.3:chr11:95067825:+	1,56	+
chr11	95067852	95067853	ENSG00000263465.5:ENST00000587424.3:chr11:95067852:+	1,56	+
chr11	95068008	95068009	ENSG00000263465.5:ENST00000587424.3:chr11:95068008:+	1,56	+
chr17	42193329	42193330	ENSG00000167925.16:ENST00000587427.6:chr17:42193329:-	1,59	-
chr17	42193338	42193339	ENSG00000167925.16:ENST00000587427.6:chr17:42193338:-	1,59	-
chr17	42193537	42193538	ENSG00000167925.16:ENST00000587427.6:chr17:42193537:-	1,59	-
chr17	42192910	42192911	ENSG00000167925.16:ENST00000587427.6:chr17:42192910:-	1,59	-
chr17	42193001	42193002	ENSG00000167925.16:ENST00000587427.6:chr17:42193001:-	1,59	-
chr17	42193017	42193018	ENSG00000167925.16:ENST00000587427.6:chr17:42193017:-	1,59	-
chr17	42192364	42192365	ENSG00000167925.16:ENST00000587427.6:chr17:42192364:-	1,59	-
chr17	42192372	42192373	ENSG00000167925.16:ENST00000587427.6:chr17:42192372:-	1,59	-
chr17	42192485	42192486	ENSG00000167925.16:ENST00000587427.6:chr17:42192485:-	1,59	-
chr17	42192524	42192525	ENSG00000167925.16:ENST00000587427.6:chr17:42192524:-	1,59	-
chr17	42192561	42192562	ENSG00000167925.16:ENST00000587427.6:chr17:42192561:-	1,59	-
chr17	42192565	42192566	ENSG00000167925.16:ENST00000587427.6:chr17:42192565:-	3,59	-
chr17	42192620	42192621	ENSG00000167925.16:ENST00000587427.6:chr17:42192620:-	3,59	-
chr17	42192712	42192713	ENSG00000167925.16:ENST00000587427.6:chr17:42192712:-	1,59	-
chr17	42191089	42191090	ENSG00000167925.16:ENST00000587427.6:chr17:42191089:-	1,59	-
chr17	42191121	42191122	ENSG00000167925.16:ENST00000587427.6:chr17:42191121:-	1,59	-
chr17	42191163	42191164	ENSG00000167925.16:ENST00000587427.6:chr17:42191163:-	1,59	-
chr17	42191189	42191190	ENSG00000167925.16:ENST00000587427.6:chr17:42191189:-	1,59	-
chr17	42190626	42190627	ENSG00000167925.16:ENST00000587427.6:chr17:42190626:-	3,59	-
chr17	42190685	42190686	ENSG00000167925.16:ENST00000587427.6:chr17:42190685:-	1,59	-
chr17	42190745	42190746	ENSG00000167925.16:ENST00000587427.6:chr17:42190745:-	1,59	-
chr17	42190266	42190267	ENSG00000167925.16:ENST00000587427.6:chr17:42190266:-	1,59	-
chr17	42189746	42189747	ENSG00000167925.16:ENST00000587427.6:chr17:42189746:-	1,59	-
chr17	42189812	42189813	ENSG00000167925.16:ENST00000587427.6:chr17:42189812:-	2,59	-
chr17	42189885	42189886	ENSG00000167925.16:ENST00000587427.6:chr17:42189885:-	1,59	-
chr17	42189898	42189899	ENSG00000167925.16:ENST00000587427.6:chr17:42189898:-	1,59	-
chr17	42189912	42189913	ENSG00000167925.16:ENST00000587427.6:chr17:42189912:-	1,59	-
chr17	42834350	42834351	ENSG00000131467.11:ENST00000590720.6:chr17:42834350:+	1425	+
chr17	42834368	42834369	ENSG00000131467.11:ENST00000590720.6:chr17:42834368:+	1425	+
chr17	42834559	42834560	ENSG00000131467.11:ENST00000590720.6:chr17:42834559:+	1428	+
chr17	42834571	42834572	ENSG00000131467.11:ENST00000590720.6:chr17:42834571:+	1428	+
chr17	42834774	42834775	ENSG00000131467.11:ENST00000590720.6:chr17:42834774:+	2428	+
chr17	42834779	42834780	ENSG00000131467.11:ENST00000590720.6:chr17:42834779:+	2428	+
chr17	42834788	42834789	ENSG00000131467.11:ENST00000590720.6:chr17:42834788:+	1428	+
chr17	42834811	42834812	ENSG00000131467.11:ENST00000590720.6:chr17:42834811:+	1428	+
chr17	42834825	42834826	ENSG00000131467.11:ENST00000590720.6:chr17:42834825:+	1428	+
chr17	42837652	42837653	ENSG00000131467.11:ENST00000590720.6:chr17:42837652:+	1428	+
chr17	42838095	42838096	ENSG00000131467.11:ENST00000590720.6:chr17:42838095:+	2428	+
chr17	42838745	42838746	ENSG00000131467.11:ENST00000590720.6:chr17:42838745:+	1429	+
chr17	42838757	42838758	ENSG00000131467.11:ENST00000590720.6:chr17:42838757:+	2426	+
chr17	42838777	42838778	ENSG00000131467.11:ENST00000590720.6:chr17:42838777:+	1429	+
chr17	42838791	42838792	ENSG00000131467.11:ENST00000590720.6:chr17:42838791:+	1428	+
chr17	42838990	42838991	ENSG00000131467.11:ENST00000590720.6:chr17:42838990:+	1429	+
chr17	42838995	42838996	ENSG00000131467.11:ENST00000590720.6:chr17:42838995:+	1429	+
chr17	42839008	42839009	ENSG00000131467.11:ENST00000590720.6:chr17:42839008:+	1429	+
chr17	42839140	42839141	ENSG00000131467.11:ENST00000590720.6:chr17:42839140:+	2429	+
chr17	42839157	42839158	ENSG00000131467.11:ENST00000590720.6:chr17:42839157:+	2428	+
chr17	42839309	42839310	ENSG00000131467.11:ENST00000590720.6:chr17:42839309:+	3429	+
chr17	42841503	42841504	ENSG00000131467.11:ENST00000590720.6:chr17:42841503:+	1428	+
chr17	42841542	42841543	ENSG00000131467.11:ENST00000590720.6:chr17:42841542:+	1428	+
chr17	44014881	44014882	ENSG00000091947.10:ENST00000589334.5:chr17:44014881:-	1,38	-
chr17	44014365	44014366	ENSG00000091947.10:ENST00000589334.5:chr17:44014365:-	1,38	-
chr17	44014389	44014390	ENSG00000091947.10:ENST00000589334.5:chr17:44014389:-	1,38	-
chr17	44014392	44014393	ENSG00000091947.10:ENST00000589334.5:chr17:44014392:-	1,38	-
chr17	44014407	44014408	ENSG00000091947.10:ENST00000589334.5:chr17:44014407:-	1,38	-
chr17	44014527	44014528	ENSG00000091947.10:ENST00000589334.5:chr17:44014527:-	2,38	-
chr17	44013070	44013071	ENSG00000091947.10:ENST00000589334.5:chr17:44013070:-	1,38	-
chr17	44013080	44013081	ENSG00000091947.10:ENST00000589334.5:chr17:44013080:-	1,38	-
chr17	44013116	44013117	ENSG00000091947.10:ENST00000589334.5:chr17:44013116:-	1,38	-
chr17	44013125	44013126	ENSG00000091947.10:ENST00000589334.5:chr17:44013125:-	1,38	-
chr17	44013143	44013144	ENSG00000091947.10:ENST00000589334.5:chr17:44013143:-	1,38	-
chr17	44011937	44011938	ENSG00000091947.10:ENST00000589334.5:chr17:44011937:-	1,38	-
chr17	44011955	44011956	ENSG00000091947.10:ENST00000589334.5:chr17:44011955:-	1,38	-
chr17	44012073	44012074	ENSG00000091947.10:ENST00000589334.5:chr17:44012073:-	1,38	-
chr17	44012099	44012100	ENSG00000091947.10:ENST00000589334.5:chr17:44012099:-	1,38	-
chr17	44012157	44012158	ENSG00000091947.10:ENST00000589334.5:chr17:44012157:-	1,38	-
chr17	44350330	44350331	ENSG00000030582.18:ENST00000589265.5:chr17:44350330:+	1,1	+
chr17	45243257	45243258	ENSG00000184922.14:ENST00000587489.5:chr17:45243257:+	1,23	+
chr17	45245012	45245013	ENSG00000184922.14:ENST00000587489.5:chr17:45245012:+	1,38	+
chr17	45245400	45245401	ENSG00000184922.14:ENST00000587489.5:chr17:45245400:+	1,39	+
chr17	45245680	45245681	ENSG00000184922.14:ENST00000587489.5:chr17:45245680:+	1,39	+
chr17	45245943	45245944	ENSG00000184922.14:ENST00000587489.5:chr17:45245943:+	1,39	+
chr17	45246957	45246958	ENSG00000184922.14:ENST00000587489.5:chr17:45246957:+	1,39	+
chr17	68515461	68515462	ENSG00000108946.15:ENST00000589228.6:chr17:68515461:+	1,96	+
chr17	68515464	68515465	ENSG00000108946.15:ENST00000589228.6:chr17:68515464:+	1,96	+
chr17	68515499	68515500	ENSG00000108946.15:ENST00000589228.6:chr17:68515499:+	1,96	+
chr17	68515517	68515518	ENSG00000108946.15:ENST00000589228.6:chr17:68515517:+	1,96	+
chr17	68515525	68515526	ENSG00000108946.15:ENST00000589228.6:chr17:68515525:+	1,96	+
chr17	68522801	68522802	ENSG00000108946.15:ENST00000589228.6:chr17:68522801:+	1,96	+
chr17	68522841	68522842	ENSG00000108946.15:ENST00000589228.6:chr17:68522841:+	2,96	+
chr17	68523746	68523747	ENSG00000108946.15:ENST00000589228.6:chr17:68523746:+	1,96	+
chr17	68523762	68523763	ENSG00000108946.15:ENST00000589228.6:chr17:68523762:+	1,96	+
chr17	68524038	68524039	ENSG00000108946.15:ENST00000589228.6:chr17:68524038:+	1,96	+
chr17	68524070	68524071	ENSG00000108946.15:ENST00000589228.6:chr17:68524070:+	1,96	+
chr17	68525764	68525765	ENSG00000108946.15:ENST00000589228.6:chr17:68525764:+	2,96	+
chr17	68525831	68525832	ENSG00000108946.15:ENST00000589228.6:chr17:68525831:+	1,96	+
chr17	68525848	68525849	ENSG00000108946.15:ENST00000589228.6:chr17:68525848:+	1,96	+
chr17	68527848	68527849	ENSG00000108946.15:ENST00000589228.6:chr17:68527848:+	2,96	+
chr17	68528889	68528890	ENSG00000108946.15:ENST00000589228.6:chr17:68528889:+	1,96	+
chr17	68529937	68529938	ENSG00000108946.15:ENST00000589228.6:chr17:68529937:+	1,96	+
chr17	68530302	68530303	ENSG00000108946.15:ENST00000589228.6:chr17:68530302:+	1,96	+
chr17	68530334	68530335	ENSG00000108946.15:ENST00000589228.6:chr17:68530334:+	1,96	+
chr17	68530350	68530351	ENSG00000108946.15:ENST00000589228.6:chr17:68530350:+	1,96	+
chr17	68530359	68530360	ENSG00000108946.15:ENST00000589228.6:chr17:68530359:+	1,96	+
chr17	75764992	75764993	ENSG00000108479.13:ENST00000588479.6:chr17:75764992:-	1,86	-
chr17	75765013	75765014	ENSG00000108479.13:ENST00000588479.6:chr17:75765013:-	1,86	-
chr17	75765019	75765020	ENSG00000108479.13:ENST00000588479.6:chr17:75765019:-	1,86	-
chr17	75765038	75765039	ENSG00000108479.13:ENST00000588479.6:chr17:75765038:-	1,85	-
chr17	75763900	75763901	ENSG00000108479.13:ENST00000588479.6:chr17:75763900:-	1,87	-
chr17	75763903	75763904	ENSG00000108479.13:ENST00000588479.6:chr17:75763903:-	2,87	-
chr17	75763938	75763939	ENSG00000108479.13:ENST00000588479.6:chr17:75763938:-	1,87	-
chr17	75764015	75764016	ENSG00000108479.13:ENST00000588479.6:chr17:75764015:-	1,87	-
chr17	75764026	75764027	ENSG00000108479.13:ENST00000588479.6:chr17:75764026:-	1,87	-
chr17	75764030	75764031	ENSG00000108479.13:ENST00000588479.6:chr17:75764030:-	2,87	-
chr17	75764069	75764070	ENSG00000108479.13:ENST00000588479.6:chr17:75764069:-	1,86	-
chr17	75763342	75763343	ENSG00000108479.13:ENST00000588479.6:chr17:75763342:-	1,86	-
chr17	75763348	75763349	ENSG00000108479.13:ENST00000588479.6:chr17:75763348:-	1,86	-
chr17	75763399	75763400	ENSG00000108479.13:ENST00000588479.6:chr17:75763399:-	1,87	-
chr17	75763018	75763019	ENSG00000108479.13:ENST00000588479.6:chr17:75763018:-	3,88	-
chr17	75763053	75763054	ENSG00000108479.13:ENST00000588479.6:chr17:75763053:-	2,87	-
chr17	75762750	75762751	ENSG00000108479.13:ENST00000588479.6:chr17:75762750:-	1,89	-
chr17	75762788	75762789	ENSG00000108479.13:ENST00000588479.6:chr17:75762788:-	1,89	-
chr17	75758452	75758453	ENSG00000108479.13:ENST00000588479.6:chr17:75758452:-	1,89	-
chr17	75758456	75758457	ENSG00000108479.13:ENST00000588479.6:chr17:75758456:-	1,89	-
chr17	75758498	75758499	ENSG00000108479.13:ENST00000588479.6:chr17:75758498:-	1,89	-
chr17	75758503	75758504	ENSG00000108479.13:ENST00000588479.6:chr17:75758503:-	1,89	-
chr17	75758529	75758530	ENSG00000108479.13:ENST00000588479.6:chr17:75758529:-	1,89	-
chr17	75758536	75758537	ENSG00000108479.13:ENST00000588479.6:chr17:75758536:-	1,89	-
chr17	75758563	75758564	ENSG00000108479.13:ENST00000588479.6:chr17:75758563:-	1,89	-
chr17	75758567	75758568	ENSG00000108479.13:ENST00000588479.6:chr17:75758567:-	1,89	-
chr17	75758215	75758216	ENSG00000108479.13:ENST00000588479.6:chr17:75758215:-	1,89	-
chr17	75758220	75758221	ENSG00000108479.13:ENST00000588479.6:chr17:75758220:-	1,89	-
chr17	75758227	75758228	ENSG00000108479.13:ENST00000588479.6:chr17:75758227:-	1,89	-
chr17	75758275	75758276	ENSG00000108479.13:ENST00000588479.6:chr17:75758275:-	1,89	-
chr17	75758285	75758286	ENSG00000108479.13:ENST00000588479.6:chr17:75758285:-	1,89	-
chr17	75758094	75758095	ENSG00000108479.13:ENST00000588479.6:chr17:75758094:-	2,89	-
chr17	75784918	75784919	ENSG00000132478.10:ENST00000586527.1:chr17:75784918:+	1,53	+
chr17	75784928	75784929	ENSG00000132478.10:ENST00000586527.1:chr17:75784928:+	1,53	+
chr17	75784929	75784930	ENSG00000132478.10:ENST00000586527.1:chr17:75784929:+	1,53	+
chr17	75791771	75791772	ENSG00000132478.10:ENST00000586527.1:chr17:75791771:+	1,54	+
chr18	36033741	36033742	ENSG00000141425.18:ENST00000589050.1:chr18:36033741:-	1,5	-
chr18	36031091	36031092	ENSG00000141425.18:ENST00000589050.1:chr18:36031091:-	1,5	-
chr18	36027308	36027309	ENSG00000141425.18:ENST00000589050.1:chr18:36027308:-	1,5	-
chr18	36025651	36025652	ENSG00000141425.18:ENST00000589050.1:chr18:36025651:-	1,5	-
chr18	59140001	59140002	ENSG00000166562.9:ENST00000588875.2:chr18:59140001:+	1,2	+
chr18	59155713	59155714	ENSG00000166562.9:ENST00000588875.2:chr18:59155713:+	1,2	+
chr19	633439	633440	ENSG00000099821.14:ENST00000588649.7:chr19:633439:-	1,81	-
chr19	629717	629718	ENSG00000099821.14:ENST00000588649.7:chr19:629717:-	1,91	-
chr19	629729	629730	ENSG00000099821.14:ENST00000588649.7:chr19:629729:-	1,90	-
chr19	629891	629892	ENSG00000099821.14:ENST00000588649.7:chr19:629891:-	1,89	-
chr19	629931	629932	ENSG00000099821.14:ENST00000588649.7:chr19:629931:-	1,89	-
chr19	623585	623586	ENSG00000099821.14:ENST00000588649.7:chr19:623585:-	1,93	-
chr19	622892	622893	ENSG00000099821.14:ENST00000588649.7:chr19:622892:-	1,96	-
chr19	622680	622681	ENSG00000099821.14:ENST00000588649.7:chr19:622680:-	1,96	-
chr19	622203	622204	ENSG00000099821.14:ENST00000588649.7:chr19:622203:-	2,98	-
chr19	622239	622240	ENSG00000099821.14:ENST00000588649.7:chr19:622239:-	1,98	-
chr19	621078	621079	ENSG00000099821.14:ENST00000588649.7:chr19:621078:-	1104	-
chr19	621153	621154	ENSG00000099821.14:ENST00000588649.7:chr19:621153:-	1104	-
chr19	621294	621295	ENSG00000099821.14:ENST00000588649.7:chr19:621294:-	1104	-
chr19	621378	621379	ENSG00000099821.14:ENST00000588649.7:chr19:621378:-	1103	-
chr19	621405	621406	ENSG00000099821.14:ENST00000588649.7:chr19:621405:-	2102	-
chr19	621640	621641	ENSG00000099821.14:ENST00000588649.7:chr19:621640:-	2101	-
chr19	621664	621665	ENSG00000099821.14:ENST00000588649.7:chr19:621664:-	1101	-
chr19	621694	621695	ENSG00000099821.14:ENST00000588649.7:chr19:621694:-	1101	-
chr19	621730	621731	ENSG00000099821.14:ENST00000588649.7:chr19:621730:-	1101	-
chr19	621806	621807	ENSG00000099821.14:ENST00000588649.7:chr19:621806:-	1100	-
chr19	620043	620044	ENSG00000099821.14:ENST00000588649.7:chr19:620043:-	1104	-
chr19	618500	618501	ENSG00000099821.14:ENST00000588649.7:chr19:618500:-	1104	-
chr19	617818	617819	ENSG00000099821.14:ENST00000588649.7:chr19:617818:-	1104	-
chr19	5244060	5244061	ENSG00000105426.17:ENST00000588012.5:chr19:5244060:-	1,1	-
chr19	9818791	9818792	ENSG00000127452.9:ENST00000589626.5:chr19:9818791:-	1,21	-
chr19	11174524	11174525	ENSG00000197256.11:ENST00000586659.6:chr19:11174524:-	1,14	-
chr19	11174536	11174537	ENSG00000197256.11:ENST00000586659.6:chr19:11174536:-	1,13	-
chr19	11174566	11174567	ENSG00000197256.11:ENST00000586659.6:chr19:11174566:-	1,13	-
chr19	11172998	11172999	ENSG00000197256.11:ENST00000586659.6:chr19:11172998:-	1,14	-
chr19	11173068	11173069	ENSG00000197256.11:ENST00000586659.6:chr19:11173068:-	1,14	-
chr19	11169913	11169914	ENSG00000197256.11:ENST00000586659.6:chr19:11169913:-	1,16	-
chr19	11345344	11345345	ENSG00000105518.14:ENST00000589555.5:chr19:11345344:-	1,2	-
chr19	38304484	38304485	ENSG00000167644.12:ENST00000588605.5:chr19:38304484:+	1,20	+
chr19	38304575	38304576	ENSG00000167644.12:ENST00000588605.5:chr19:38304575:+	1,20	+
chr19	38304604	38304605	ENSG00000167644.12:ENST00000588605.5:chr19:38304604:+	1,20	+
chr19	38304642	38304643	ENSG00000167644.12:ENST00000588605.5:chr19:38304642:+	1,20	+
chr1	1014011	1014012	ENSG00000187608.10:ENST00000649529.1:chr1:1014011:+	1213	+
chr1	1014018	1014019	ENSG00000187608.10:ENST00000649529.1:chr1:1014018:+	1213	+
chr1	1014032	1014033	ENSG00000187608.10:ENST00000649529.1:chr1:1014032:+	1213	+
chr1	1014039	1014040	ENSG00000187608.10:ENST00000649529.1:chr1:1014039:+	1213	+
chr1	1014120	1014121	ENSG00000187608.10:ENST00000649529.1:chr1:1014120:+	1213	+
chr1	1014123	1014124	ENSG00000187608.10:ENST00000649529.1:chr1:1014123:+	1212	+
chr1	1014192	1014193	ENSG00000187608.10:ENST00000649529.1:chr1:1014192:+	1213	+
chr1	1014207	1014208	ENSG00000187608.10:ENST00000649529.1:chr1:1014207:+	2213	+
chr1	1014220	1014221	ENSG00000187608.10:ENST00000649529.1:chr1:1014220:+	1213	+
chr1	1014246	1014247	ENSG00000187608.10:ENST00000649529.1:chr1:1014246:+	1213	+
chr1	1014267	1014268	ENSG00000187608.10:ENST00000649529.1:chr1:1014267:+	3213	+
chr1	1014274	1014275	ENSG00000187608.10:ENST00000649529.1:chr1:1014274:+	1213	+
chr1	1014283	1014284	ENSG00000187608.10:ENST00000649529.1:chr1:1014283:+	1213	+
chr1	1014287	1014288	ENSG00000187608.10:ENST00000649529.1:chr1:1014287:+	2213	+
chr1	1014297	1014298	ENSG00000187608.10:ENST00000649529.1:chr1:1014297:+	1213	+
chr1	1014315	1014316	ENSG00000187608.10:ENST00000649529.1:chr1:1014315:+	1213	+
chr1	1014336	1014337	ENSG00000187608.10:ENST00000649529.1:chr1:1014336:+	2213	+
chr1	1014339	1014340	ENSG00000187608.10:ENST00000649529.1:chr1:1014339:+	6213	+
chr1	1014345	1014346	ENSG00000187608.10:ENST00000649529.1:chr1:1014345:+	1213	+
chr1	1014353	1014354	ENSG00000187608.10:ENST00000649529.1:chr1:1014353:+	1213	+
chr1	1014357	1014358	ENSG00000187608.10:ENST00000649529.1:chr1:1014357:+	3213	+
chr1	1014370	1014371	ENSG00000187608.10:ENST00000649529.1:chr1:1014370:+	1213	+
chr1	1014442	1014443	ENSG00000187608.10:ENST00000649529.1:chr1:1014442:+	1213	+
chr1	1014465	1014466	ENSG00000187608.10:ENST00000649529.1:chr1:1014465:+	2213	+
chr1	31918975	31918976	ENSG00000184007.22:ENST00000647444.2:chr1:31918975:-	1126	-
chr1	31918986	31918987	ENSG00000184007.22:ENST00000647444.2:chr1:31918986:-	1126	-
chr1	31918988	31918989	ENSG00000184007.22:ENST00000647444.2:chr1:31918988:-	1126	-
chr1	31915903	31915904	ENSG00000184007.22:ENST00000647444.2:chr1:31915903:-	1126	-
chr1	31915964	31915965	ENSG00000184007.22:ENST00000647444.2:chr1:31915964:-	1126	-
chr1	31910038	31910039	ENSG00000184007.22:ENST00000647444.2:chr1:31910038:-	1126	-
chr1	31910092	31910093	ENSG00000184007.22:ENST00000647444.2:chr1:31910092:-	1126	-
chr1	31910101	31910102	ENSG00000184007.22:ENST00000647444.2:chr1:31910101:-	1126	-
chr1	31910106	31910107	ENSG00000184007.22:ENST00000647444.2:chr1:31910106:-	1126	-
chr1	36286717	36286718	ENSG00000054118.15:ENST00000648638.1:chr1:36286717:+	1,4	+
chr1	46561579	46561580	ENSG00000079277.22:ENST00000650026.1:chr1:46561579:-	1,6	-
chr1	113905661	113905662	ENSG00000118655.7:ENST00000648795.1:chr1:113905661:+	1,10	+
chr1	173825234	173825235	ENSG00000117593.12:ENST00000649689.2:chr1:173825234:+	1,24	+
chr1	173826710	173826711	ENSG00000117593.12:ENST00000649689.2:chr1:173826710:+	1,24	+
chr1	173833413	173833414	ENSG00000117593.12:ENST00000649689.2:chr1:173833413:+	1,24	+
chr1	173837005	173837006	ENSG00000117593.12:ENST00000649689.2:chr1:173837005:+	1,24	+
chr1	173839478	173839479	ENSG00000117593.12:ENST00000649689.2:chr1:173839478:+	1,24	+
chr1	173840922	173840923	ENSG00000117593.12:ENST00000649689.2:chr1:173840922:+	1,24	+
chr1	173853814	173853815	ENSG00000117593.12:ENST00000649689.2:chr1:173853814:+	2,24	+
chr1	173853849	173853850	ENSG00000117593.12:ENST00000649689.2:chr1:173853849:+	1,24	+
chr1	173853862	173853863	ENSG00000117593.12:ENST00000649689.2:chr1:173853862:+	1,24	+
chr1	173857631	173857632	ENSG00000117593.12:ENST00000649689.2:chr1:173857631:+	1,24	+
chr1	173857680	173857681	ENSG00000117593.12:ENST00000649689.2:chr1:173857680:+	1,24	+
chr2	162318200	162318201	ENSG00000115267.9:ENST00000649979.2:chr2:162318200:-	1,6	-
chr2	162281398	162281399	ENSG00000115267.9:ENST00000649979.2:chr2:162281398:-	1,5	-
chr3	39383787	39383788	ENSG00000144659.13:ENST00000650617.1:chr3:39383787:+	1151	+
chr3	39389497	39389498	ENSG00000144659.13:ENST00000650617.1:chr3:39389497:+	1151	+
chr3	39389572	39389573	ENSG00000144659.13:ENST00000650617.1:chr3:39389572:+	1151	+
chr3	39389590	39389591	ENSG00000144659.13:ENST00000650617.1:chr3:39389590:+	1151	+
chr3	39390465	39390466	ENSG00000144659.13:ENST00000650617.1:chr3:39390465:+	1154	+
chr3	39391523	39391524	ENSG00000144659.13:ENST00000650617.1:chr3:39391523:+	1156	+
chr3	39391929	39391930	ENSG00000144659.13:ENST00000650617.1:chr3:39391929:+	1158	+
chr3	39391954	39391955	ENSG00000144659.13:ENST00000650617.1:chr3:39391954:+	1158	+
chr3	39392000	39392001	ENSG00000144659.13:ENST00000650617.1:chr3:39392000:+	1159	+
chr3	39392017	39392018	ENSG00000144659.13:ENST00000650617.1:chr3:39392017:+	1159	+
chr3	39394446	39394447	ENSG00000144659.13:ENST00000650617.1:chr3:39394446:+	1159	+
chr3	39394480	39394481	ENSG00000144659.13:ENST00000650617.1:chr3:39394480:+	1159	+
chr3	39394492	39394493	ENSG00000144659.13:ENST00000650617.1:chr3:39394492:+	1159	+
chr3	39394511	39394512	ENSG00000144659.13:ENST00000650617.1:chr3:39394511:+	1159	+
chr3	39394564	39394565	ENSG00000144659.13:ENST00000650617.1:chr3:39394564:+	2159	+
chr3	39396444	39396445	ENSG00000144659.13:ENST00000650617.1:chr3:39396444:+	1159	+
chr3	98592974	98592975	ENSG00000080819.9:ENST00000647941.2:chr3:98592974:-	1,41	-
chr3	98593063	98593064	ENSG00000080819.9:ENST00000647941.2:chr3:98593063:-	1,41	-
chr3	98593097	98593098	ENSG00000080819.9:ENST00000647941.2:chr3:98593097:-	1,41	-
chr3	98593126	98593127	ENSG00000080819.9:ENST00000647941.2:chr3:98593126:-	1,41	-
chr3	98593272	98593273	ENSG00000080819.9:ENST00000647941.2:chr3:98593272:-	1,39	-
chr3	98593368	98593369	ENSG00000080819.9:ENST00000647941.2:chr3:98593368:-	1,37	-
chr3	98591088	98591089	ENSG00000080819.9:ENST00000647941.2:chr3:98591088:-	1,44	-
chr3	98591141	98591142	ENSG00000080819.9:ENST00000647941.2:chr3:98591141:-	1,42	-
chr3	98590653	98590654	ENSG00000080819.9:ENST00000647941.2:chr3:98590653:-	1,45	-
chr3	98590688	98590689	ENSG00000080819.9:ENST00000647941.2:chr3:98590688:-	1,45	-
chr3	98588757	98588758	ENSG00000080819.9:ENST00000647941.2:chr3:98588757:-	1,45	-
chr3	98580694	98580695	ENSG00000080819.9:ENST00000647941.2:chr3:98580694:-	1,46	-
chr4	3532228	3532229	ENSG00000163956.13:ENST00000650182.1:chr4:3532228:-	11210	-
chr4	3532232	3532233	ENSG00000163956.13:ENST00000650182.1:chr4:3532232:-	91210	-
chr4	3532250	3532251	ENSG00000163956.13:ENST00000650182.1:chr4:3532250:-	31210	-
chr4	3532263	3532264	ENSG00000163956.13:ENST00000650182.1:chr4:3532263:-	11210	-
chr4	3532278	3532279	ENSG00000163956.13:ENST00000650182.1:chr4:3532278:-	11210	-
chr4	3532281	3532282	ENSG00000163956.13:ENST00000650182.1:chr4:3532281:-	11209	-
chr4	3532282	3532283	ENSG00000163956.13:ENST00000650182.1:chr4:3532282:-	11210	-
chr4	3532288	3532289	ENSG00000163956.13:ENST00000650182.1:chr4:3532288:-	11210	-
chr4	3532303	3532304	ENSG00000163956.13:ENST00000650182.1:chr4:3532303:-	11207	-
chr4	3532305	3532306	ENSG00000163956.13:ENST00000650182.1:chr4:3532305:-	21207	-
chr4	3532313	3532314	ENSG00000163956.13:ENST00000650182.1:chr4:3532313:-	21208	-
chr4	3532316	3532317	ENSG00000163956.13:ENST00000650182.1:chr4:3532316:-	31207	-
chr4	3532322	3532323	ENSG00000163956.13:ENST00000650182.1:chr4:3532322:-	11206	-
chr4	3532343	3532344	ENSG00000163956.13:ENST00000650182.1:chr4:3532343:-	11204	-
chr4	3532349	3532350	ENSG00000163956.13:ENST00000650182.1:chr4:3532349:-	11203	-
chr4	3532368	3532369	ENSG00000163956.13:ENST00000650182.1:chr4:3532368:-	11202	-
chr4	3532375	3532376	ENSG00000163956.13:ENST00000650182.1:chr4:3532375:-	11202	-
chr4	3532381	3532382	ENSG00000163956.13:ENST00000650182.1:chr4:3532381:-	21202	-
chr4	3532384	3532385	ENSG00000163956.13:ENST00000650182.1:chr4:3532384:-	31203	-
chr4	3532394	3532395	ENSG00000163956.13:ENST00000650182.1:chr4:3532394:-	11198	-
chr4	3532404	3532405	ENSG00000163956.13:ENST00000650182.1:chr4:3532404:-	11193	-
chr4	3524982	3524983	ENSG00000163956.13:ENST00000650182.1:chr4:3524982:-	21211	-
chr4	3525013	3525014	ENSG00000163956.13:ENST00000650182.1:chr4:3525013:-	11211	-
chr4	3525015	3525016	ENSG00000163956.13:ENST00000650182.1:chr4:3525015:-	21211	-
chr4	3525018	3525019	ENSG00000163956.13:ENST00000650182.1:chr4:3525018:-	31211	-
chr4	3525024	3525025	ENSG00000163956.13:ENST00000650182.1:chr4:3525024:-	11211	-
chr4	3525025	3525026	ENSG00000163956.13:ENST00000650182.1:chr4:3525025:-	21211	-
chr4	3525029	3525030	ENSG00000163956.13:ENST00000650182.1:chr4:3525029:-	21211	-
chr4	3525044	3525045	ENSG00000163956.13:ENST00000650182.1:chr4:3525044:-	21210	-
chr4	3525047	3525048	ENSG00000163956.13:ENST00000650182.1:chr4:3525047:-	11210	-
chr4	3520076	3520077	ENSG00000163956.13:ENST00000650182.1:chr4:3520076:-	41216	-
chr4	3520120	3520121	ENSG00000163956.13:ENST00000650182.1:chr4:3520120:-	41215	-
chr4	3520122	3520123	ENSG00000163956.13:ENST00000650182.1:chr4:3520122:-	11215	-
chr4	3520128	3520129	ENSG00000163956.13:ENST00000650182.1:chr4:3520128:-	101214	-
chr4	3520137	3520138	ENSG00000163956.13:ENST00000650182.1:chr4:3520137:-	11214	-
chr4	3520151	3520152	ENSG00000163956.13:ENST00000650182.1:chr4:3520151:-	11214	-
chr4	3520155	3520156	ENSG00000163956.13:ENST00000650182.1:chr4:3520155:-	101214	-
chr4	3520172	3520173	ENSG00000163956.13:ENST00000650182.1:chr4:3520172:-	11214	-
chr4	3520191	3520192	ENSG00000163956.13:ENST00000650182.1:chr4:3520191:-	21213	-
chr4	3518875	3518876	ENSG00000163956.13:ENST00000650182.1:chr4:3518875:-	11219	-
chr4	3518885	3518886	ENSG00000163956.13:ENST00000650182.1:chr4:3518885:-	11217	-
chr4	3518901	3518902	ENSG00000163956.13:ENST00000650182.1:chr4:3518901:-	51219	-
chr4	3518912	3518913	ENSG00000163956.13:ENST00000650182.1:chr4:3518912:-	11219	-
chr4	3518927	3518928	ENSG00000163956.13:ENST00000650182.1:chr4:3518927:-	31218	-
chr4	3518930	3518931	ENSG00000163956.13:ENST00000650182.1:chr4:3518930:-	21218	-
chr4	3518946	3518947	ENSG00000163956.13:ENST00000650182.1:chr4:3518946:-	11218	-
chr4	3518957	3518958	ENSG00000163956.13:ENST00000650182.1:chr4:3518957:-	31217	-
chr4	3518982	3518983	ENSG00000163956.13:ENST00000650182.1:chr4:3518982:-	11216	-
chr4	3518061	3518062	ENSG00000163956.13:ENST00000650182.1:chr4:3518061:-	11219	-
chr4	3518082	3518083	ENSG00000163956.13:ENST00000650182.1:chr4:3518082:-	21219	-
chr4	3518094	3518095	ENSG00000163956.13:ENST00000650182.1:chr4:3518094:-	11219	-
chr4	3518102	3518103	ENSG00000163956.13:ENST00000650182.1:chr4:3518102:-	11219	-
chr4	3518166	3518167	ENSG00000163956.13:ENST00000650182.1:chr4:3518166:-	11216	-
chr4	3518175	3518176	ENSG00000163956.13:ENST00000650182.1:chr4:3518175:-	21219	-
chr4	3518187	3518188	ENSG00000163956.13:ENST00000650182.1:chr4:3518187:-	21219	-
chr4	3516118	3516119	ENSG00000163956.13:ENST00000650182.1:chr4:3516118:-	11218	-
chr4	3516122	3516123	ENSG00000163956.13:ENST00000650182.1:chr4:3516122:-	21219	-
chr4	3516129	3516130	ENSG00000163956.13:ENST00000650182.1:chr4:3516129:-	11219	-
chr4	3516163	3516164	ENSG00000163956.13:ENST00000650182.1:chr4:3516163:-	31219	-
chr4	3516186	3516187	ENSG00000163956.13:ENST00000650182.1:chr4:3516186:-	21219	-
chr4	3516193	3516194	ENSG00000163956.13:ENST00000650182.1:chr4:3516193:-	61219	-
chr4	3514757	3514758	ENSG00000163956.13:ENST00000650182.1:chr4:3514757:-	11221	-
chr4	3514792	3514793	ENSG00000163956.13:ENST00000650182.1:chr4:3514792:-	11219	-
chr4	3514808	3514809	ENSG00000163956.13:ENST00000650182.1:chr4:3514808:-	11219	-
chr4	3514891	3514892	ENSG00000163956.13:ENST00000650182.1:chr4:3514891:-	11219	-
chr4	3512990	3512991	ENSG00000163956.13:ENST00000650182.1:chr4:3512990:-	11221	-
chr4	3512998	3512999	ENSG00000163956.13:ENST00000650182.1:chr4:3512998:-	21221	-
chr4	3513000	3513001	ENSG00000163956.13:ENST00000650182.1:chr4:3513000:-	21221	-
chr4	3513023	3513024	ENSG00000163956.13:ENST00000650182.1:chr4:3513023:-	21221	-
chr4	83284569	83284570	ENSG00000173085.15:ENST00000647002.2:chr4:83284569:-	1,1	-
chr4	102714462	102714463	ENSG00000109323.11:ENST00000647097.2:chr4:102714462:-	1,1	-
chr4	102664741	102664742	ENSG00000109323.11:ENST00000647097.2:chr4:102664741:-	1,3	-
chr4	102636002	102636003	ENSG00000109323.11:ENST00000647097.2:chr4:102636002:-	1,3	-
chr4	102632156	102632157	ENSG00000109323.11:ENST00000647097.2:chr4:102632156:-	1,3	-
chr4	145646069	145646070	ENSG00000151611.17:ENST00000649156.2:chr4:145646069:+	1,2	+
chr6	3850409	3850410	ENSG00000145945.7:ENST00000648326.1:chr6:3850409:+	1,23	+
chr6	3850551	3850552	ENSG00000145945.7:ENST00000648326.1:chr6:3850551:+	1,23	+
chr6	18221933	18221934	ENSG00000165097.16:ENST00000650836.2:chr6:18221933:+	1,5	+
chr6	34425110	34425111	ENSG00000124614.16:ENST00000648437.1:chr6:34425110:-	4390	-
chr6	34425133	34425134	ENSG00000124614.16:ENST00000648437.1:chr6:34425133:-	1390	-
chr6	34425137	34425138	ENSG00000124614.16:ENST00000648437.1:chr6:34425137:-	3390	-
chr6	34425140	34425141	ENSG00000124614.16:ENST00000648437.1:chr6:34425140:-	1390	-
chr6	34424677	34424678	ENSG00000124614.16:ENST00000648437.1:chr6:34424677:-	1390	-
chr6	34424707	34424708	ENSG00000124614.16:ENST00000648437.1:chr6:34424707:-	1390	-
chr6	34424712	34424713	ENSG00000124614.16:ENST00000648437.1:chr6:34424712:-	1390	-
chr6	34424744	34424745	ENSG00000124614.16:ENST00000648437.1:chr6:34424744:-	4390	-
chr6	34424753	34424754	ENSG00000124614.16:ENST00000648437.1:chr6:34424753:-	3390	-
chr6	34424786	34424787	ENSG00000124614.16:ENST00000648437.1:chr6:34424786:-	1390	-
chr6	34424789	34424790	ENSG00000124614.16:ENST00000648437.1:chr6:34424789:-	2390	-
chr6	34424828	34424829	ENSG00000124614.16:ENST00000648437.1:chr6:34424828:-	1390	-
chr6	34421751	34421752	ENSG00000124614.16:ENST00000648437.1:chr6:34421751:-	1390	-
chr6	34421764	34421765	ENSG00000124614.16:ENST00000648437.1:chr6:34421764:-	1390	-
chr6	34421778	34421779	ENSG00000124614.16:ENST00000648437.1:chr6:34421778:-	2390	-
chr6	34421785	34421786	ENSG00000124614.16:ENST00000648437.1:chr6:34421785:-	3390	-
chr6	34421804	34421805	ENSG00000124614.16:ENST00000648437.1:chr6:34421804:-	1390	-
chr6	34418374	34418375	ENSG00000124614.16:ENST00000648437.1:chr6:34418374:-	1390	-
chr6	34418381	34418382	ENSG00000124614.16:ENST00000648437.1:chr6:34418381:-	1390	-
chr6	34418384	34418385	ENSG00000124614.16:ENST00000648437.1:chr6:34418384:-	1390	-
chr6	34417510	34417511	ENSG00000124614.16:ENST00000648437.1:chr6:34417510:-	2390	-
chr6	36959254	36959255	ENSG00000164530.15:ENST00000647861.1:chr6:36959254:+	1,4	+
chr6	36961923	36961924	ENSG00000164530.15:ENST00000647861.1:chr6:36961923:+	1,4	+
chr6	53544549	53544550	ENSG00000001084.13:ENST00000650454.1:chr6:53544549:-	1,4	-
chr6	53507600	53507601	ENSG00000001084.13:ENST00000650454.1:chr6:53507600:-	1,4	-
chr6	69701450	69701451	ENSG00000168216.13:ENST00000649934.3:chr6:69701450:-	1,11	-
chr6	69699111	69699112	ENSG00000168216.13:ENST00000649934.3:chr6:69699111:-	1,11	-
chr6	131886657	131886658	ENSG00000197594.14:ENST00000647893.1:chr6:131886657:+	1,4	+
chr7	4781240	4781241	ENSG00000242802.9:ENST00000647984.1:chr7:4781240:+	1,3	+
chr7	141555564	141555565	ENSG00000006530.18:ENST00000649286.2:chr7:141555564:+	1,49	+
chr7	141596610	141596611	ENSG00000006530.18:ENST00000649286.2:chr7:141596610:+	1,50	+
chr7	141611224	141611225	ENSG00000006530.18:ENST00000649286.2:chr7:141611224:+	1,50	+
chr7	141641260	141641261	ENSG00000006530.18:ENST00000649286.2:chr7:141641260:+	1,50	+
chr7	141641262	141641263	ENSG00000006530.18:ENST00000649286.2:chr7:141641262:+	1,50	+
chr7	141641278	141641279	ENSG00000006530.18:ENST00000649286.2:chr7:141641278:+	1,50	+
chr7	141641361	141641362	ENSG00000006530.18:ENST00000649286.2:chr7:141641361:+	1,50	+
chr7	141641385	141641386	ENSG00000006530.18:ENST00000649286.2:chr7:141641385:+	1,50	+
chr7	141641838	141641839	ENSG00000006530.18:ENST00000649286.2:chr7:141641838:+	1,50	+
chr7	141641877	141641878	ENSG00000006530.18:ENST00000649286.2:chr7:141641877:+	1,50	+
chr7	141649326	141649327	ENSG00000006530.18:ENST00000649286.2:chr7:141649326:+	1,50	+
chr7	141652849	141652850	ENSG00000006530.18:ENST00000649286.2:chr7:141652849:+	1,50	+
chr8	19953332	19953333	ENSG00000175445.17:ENST00000650287.1:chr8:19953332:+	1,1	+
chr8	19960967	19960968	ENSG00000175445.17:ENST00000650287.1:chr8:19960967:+	1,1	+
chr9	129822779	129822780	ENSG00000136827.12:ENST00000651202.1:chr9:129822779:-	1,4	-
chr11	32932468	32932469	ENSG00000060749.16:ENST00000650167.2:chr11:32932468:+	1,4	+
chr11	72093524	72093525	ENSG00000184154.15:ENST00000647530.1:chr11:72093524:+	1,2	+
chr11	77112737	77112738	ENSG00000149260.18:ENST00000648180.1:chr11:77112737:+	1,18	+
chr11	77114360	77114361	ENSG00000149260.18:ENST00000648180.1:chr11:77114360:+	1,18	+
chr11	77115515	77115516	ENSG00000149260.18:ENST00000648180.1:chr11:77115515:+	1,18	+
chr11	77118242	77118243	ENSG00000149260.18:ENST00000648180.1:chr11:77118242:+	1,18	+
chr11	77118324	77118325	ENSG00000149260.18:ENST00000648180.1:chr11:77118324:+	1,18	+
chr11	77123857	77123858	ENSG00000149260.18:ENST00000648180.1:chr11:77123857:+	1,20	+
chr11	119111151	119111152	ENSG00000172375.14:ENST00000648610.2:chr11:119111151:+	1,9	+
chr11	119113914	119113915	ENSG00000172375.14:ENST00000648610.2:chr11:119113914:+	1,12	+
chr11	119114228	119114229	ENSG00000172375.14:ENST00000648610.2:chr11:119114228:+	1,12	+
chr11	119114247	119114248	ENSG00000172375.14:ENST00000648610.2:chr11:119114247:+	1,12	+
chr12	7089445	7089446	ENSG00000159403.18:ENST00000647956.2:chr12:7089445:-	1,4	-
chr12	7082098	7082099	ENSG00000159403.18:ENST00000647956.2:chr12:7082098:-	1,4	-
chr12	7080591	7080592	ENSG00000159403.18:ENST00000647956.2:chr12:7080591:-	1,4	-
chr12	7080741	7080742	ENSG00000159403.18:ENST00000647956.2:chr12:7080741:-	1,4	-
chr12	7081007	7081008	ENSG00000159403.18:ENST00000647956.2:chr12:7081007:-	1,4	-
chr12	7081207	7081208	ENSG00000159403.18:ENST00000647956.2:chr12:7081207:-	1,4	-
chr12	49089866	49089867	ENSG00000139549.4:ENST00000649637.2:chr12:49089866:-	1,1	-
chr13	47996950	47996951	ENSG00000136143.16:ENST00000646932.1:chr13:47996950:-	1,37	-
chr13	47988907	47988908	ENSG00000136143.16:ENST00000646932.1:chr13:47988907:-	1,39	-
chr13	47988967	47988968	ENSG00000136143.16:ENST00000646932.1:chr13:47988967:-	1,39	-
chr13	47988559	47988560	ENSG00000136143.16:ENST00000646932.1:chr13:47988559:-	1,39	-
chr13	47988570	47988571	ENSG00000136143.16:ENST00000646932.1:chr13:47988570:-	1,39	-
chr13	47968605	47968606	ENSG00000136143.16:ENST00000646932.1:chr13:47968605:-	1,40	-
chr13	47968638	47968639	ENSG00000136143.16:ENST00000646932.1:chr13:47968638:-	1,40	-
chr13	47954152	47954153	ENSG00000136143.16:ENST00000646932.1:chr13:47954152:-	1,40	-
chr13	47954272	47954273	ENSG00000136143.16:ENST00000646932.1:chr13:47954272:-	1,40	-
chr13	47949022	47949023	ENSG00000136143.16:ENST00000646932.1:chr13:47949022:-	1,40	-
chr13	48233377	48233378	ENSG00000136156.15:ENST00000647800.2:chr13:48233377:+	1192	+
chr13	48233461	48233462	ENSG00000136156.15:ENST00000647800.2:chr13:48233461:+	2193	+
chr13	48233470	48233471	ENSG00000136156.15:ENST00000647800.2:chr13:48233470:+	1193	+
chr13	48253844	48253845	ENSG00000136156.15:ENST00000647800.2:chr13:48253844:+	1194	+
chr13	48253882	48253883	ENSG00000136156.15:ENST00000647800.2:chr13:48253882:+	1194	+
chr13	48253933	48253934	ENSG00000136156.15:ENST00000647800.2:chr13:48253933:+	1194	+
chr13	48256208	48256209	ENSG00000136156.15:ENST00000647800.2:chr13:48256208:+	2194	+
chr13	48256223	48256224	ENSG00000136156.15:ENST00000647800.2:chr13:48256223:+	1194	+
chr13	48256226	48256227	ENSG00000136156.15:ENST00000647800.2:chr13:48256226:+	1194	+
chr13	48256236	48256237	ENSG00000136156.15:ENST00000647800.2:chr13:48256236:+	1194	+
chr13	48256249	48256250	ENSG00000136156.15:ENST00000647800.2:chr13:48256249:+	2193	+
chr13	48256252	48256253	ENSG00000136156.15:ENST00000647800.2:chr13:48256252:+	1194	+
chr13	48256260	48256261	ENSG00000136156.15:ENST00000647800.2:chr13:48256260:+	2194	+
chr13	48256292	48256293	ENSG00000136156.15:ENST00000647800.2:chr13:48256292:+	1192	+
chr13	48256368	48256369	ENSG00000136156.15:ENST00000647800.2:chr13:48256368:+	2192	+
chr13	48256379	48256380	ENSG00000136156.15:ENST00000647800.2:chr13:48256379:+	4192	+
chr13	48258151	48258152	ENSG00000136156.15:ENST00000647800.2:chr13:48258151:+	1192	+
chr13	48258818	48258819	ENSG00000136156.15:ENST00000647800.2:chr13:48258818:+	1192	+
chr13	48258829	48258830	ENSG00000136156.15:ENST00000647800.2:chr13:48258829:+	4192	+
chr13	48258848	48258849	ENSG00000136156.15:ENST00000647800.2:chr13:48258848:+	2192	+
chr13	48258871	48258872	ENSG00000136156.15:ENST00000647800.2:chr13:48258871:+	1192	+
chr13	48258873	48258874	ENSG00000136156.15:ENST00000647800.2:chr13:48258873:+	1192	+
chr13	48258914	48258915	ENSG00000136156.15:ENST00000647800.2:chr13:48258914:+	2192	+
chr13	48261143	48261144	ENSG00000136156.15:ENST00000647800.2:chr13:48261143:+	1192	+
chr13	48261176	48261177	ENSG00000136156.15:ENST00000647800.2:chr13:48261176:+	1192	+
chr14	58428348	58428349	ENSG00000100578.18:ENST00000650904.1:chr14:58428348:+	1,1	+
chr14	91234219	91234220	ENSG00000119714.11:ENST00000650645.1:chr14:91234219:-	1,17	-
chr14	91235041	91235042	ENSG00000119714.11:ENST00000650645.1:chr14:91235041:-	1,17	-
chr15	82539997	82539998	ENSG00000182774.13:ENST00000647841.1:chr15:82539997:-	1178	-
chr15	82540038	82540039	ENSG00000182774.13:ENST00000647841.1:chr15:82540038:-	3176	-
chr15	82540046	82540047	ENSG00000182774.13:ENST00000647841.1:chr15:82540046:-	4176	-
chr15	82540057	82540058	ENSG00000182774.13:ENST00000647841.1:chr15:82540057:-	1176	-
chr15	82540070	82540071	ENSG00000182774.13:ENST00000647841.1:chr15:82540070:-	2176	-
chr15	82540112	82540113	ENSG00000182774.13:ENST00000647841.1:chr15:82540112:-	2175	-
chr15	82538883	82538884	ENSG00000182774.13:ENST00000647841.1:chr15:82538883:-	1181	-
chr15	82538884	82538885	ENSG00000182774.13:ENST00000647841.1:chr15:82538884:-	2181	-
chr15	82538894	82538895	ENSG00000182774.13:ENST00000647841.1:chr15:82538894:-	2181	-
chr15	82538931	82538932	ENSG00000182774.13:ENST00000647841.1:chr15:82538931:-	1178	-
chr15	82538971	82538972	ENSG00000182774.13:ENST00000647841.1:chr15:82538971:-	1178	-
chr15	82538976	82538977	ENSG00000182774.13:ENST00000647841.1:chr15:82538976:-	1178	-
chr15	82538327	82538328	ENSG00000182774.13:ENST00000647841.1:chr15:82538327:-	1185	-
chr15	82538366	82538367	ENSG00000182774.13:ENST00000647841.1:chr15:82538366:-	1181	-
chr15	82536807	82536808	ENSG00000182774.13:ENST00000647841.1:chr15:82536807:-	2185	-
chr15	82536817	82536818	ENSG00000182774.13:ENST00000647841.1:chr15:82536817:-	2185	-
chr15	82536847	82536848	ENSG00000182774.13:ENST00000647841.1:chr15:82536847:-	3185	-
chr15	82536856	82536857	ENSG00000182774.13:ENST00000647841.1:chr15:82536856:-	3185	-
chr15	82536868	82536869	ENSG00000182774.13:ENST00000647841.1:chr15:82536868:-	1185	-
chr15	82536878	82536879	ENSG00000182774.13:ENST00000647841.1:chr15:82536878:-	1185	-
chr16	87402191	87402192	ENSG00000140941.14:ENST00000650688.1:chr16:87402191:+	1,47	+
chr16	87402216	87402217	ENSG00000140941.14:ENST00000650688.1:chr16:87402216:+	1,47	+
chr16	87402226	87402227	ENSG00000140941.14:ENST00000650688.1:chr16:87402226:+	1,47	+
chr16	87402240	87402241	ENSG00000140941.14:ENST00000650688.1:chr16:87402240:+	2,47	+
chr16	87402245	87402246	ENSG00000140941.14:ENST00000650688.1:chr16:87402245:+	1,47	+
chr16	87402254	87402255	ENSG00000140941.14:ENST00000650688.1:chr16:87402254:+	1,47	+
chr16	87402974	87402975	ENSG00000140941.14:ENST00000650688.1:chr16:87402974:+	1,47	+
chr16	87402976	87402977	ENSG00000140941.14:ENST00000650688.1:chr16:87402976:+	1,47	+
chr16	87403003	87403004	ENSG00000140941.14:ENST00000650688.1:chr16:87403003:+	2,47	+
chr16	87403071	87403072	ENSG00000140941.14:ENST00000650688.1:chr16:87403071:+	1,47	+
chr17	1484180	1484181	ENSG00000197879.17:ENST00000648446.1:chr17:1484180:-	1,52	-
chr17	1484186	1484187	ENSG00000197879.17:ENST00000648446.1:chr17:1484186:-	1,52	-
chr17	1483676	1483677	ENSG00000197879.17:ENST00000648446.1:chr17:1483676:-	1,52	-
chr17	1483007	1483008	ENSG00000197879.17:ENST00000648446.1:chr17:1483007:-	1,52	-
chr17	1483041	1483042	ENSG00000197879.17:ENST00000648446.1:chr17:1483041:-	1,52	-
chr17	1483043	1483044	ENSG00000197879.17:ENST00000648446.1:chr17:1483043:-	1,52	-
chr17	1482483	1482484	ENSG00000197879.17:ENST00000648446.1:chr17:1482483:-	1,52	-
chr17	1482501	1482502	ENSG00000197879.17:ENST00000648446.1:chr17:1482501:-	2,52	-
chr17	1480720	1480721	ENSG00000197879.17:ENST00000648446.1:chr17:1480720:-	1,52	-
chr17	1480798	1480799	ENSG00000197879.17:ENST00000648446.1:chr17:1480798:-	1,52	-
chr17	1480852	1480853	ENSG00000197879.17:ENST00000648446.1:chr17:1480852:-	1,52	-
chr17	1480571	1480572	ENSG00000197879.17:ENST00000648446.1:chr17:1480571:-	1,52	-
chr17	1480592	1480593	ENSG00000197879.17:ENST00000648446.1:chr17:1480592:-	1,52	-
chr17	1479612	1479613	ENSG00000197879.17:ENST00000648446.1:chr17:1479612:-	1,52	-
chr17	1478655	1478656	ENSG00000197879.17:ENST00000648446.1:chr17:1478655:-	1,52	-
chr17	1478695	1478696	ENSG00000197879.17:ENST00000648446.1:chr17:1478695:-	1,52	-
chr17	1478697	1478698	ENSG00000197879.17:ENST00000648446.1:chr17:1478697:-	1,52	-
chr17	1478699	1478700	ENSG00000197879.17:ENST00000648446.1:chr17:1478699:-	1,52	-
chr17	1478717	1478718	ENSG00000197879.17:ENST00000648446.1:chr17:1478717:-	1,52	-
chr17	1478167	1478168	ENSG00000197879.17:ENST00000648446.1:chr17:1478167:-	1,52	-
chr17	1478173	1478174	ENSG00000197879.17:ENST00000648446.1:chr17:1478173:-	1,52	-
chr17	1478179	1478180	ENSG00000197879.17:ENST00000648446.1:chr17:1478179:-	1,52	-
chr17	1477897	1477898	ENSG00000197879.17:ENST00000648446.1:chr17:1477897:-	1,52	-
chr17	1477512	1477513	ENSG00000197879.17:ENST00000648446.1:chr17:1477512:-	1,52	-
chr17	1477559	1477560	ENSG00000197879.17:ENST00000648446.1:chr17:1477559:-	1,52	-
chr17	1474968	1474969	ENSG00000197879.17:ENST00000648446.1:chr17:1474968:-	1,52	-
chr17	1474980	1474981	ENSG00000197879.17:ENST00000648446.1:chr17:1474980:-	1,52	-
chr17	1474829	1474830	ENSG00000197879.17:ENST00000648446.1:chr17:1474829:-	1,52	-
chr17	1474645	1474646	ENSG00000197879.17:ENST00000648446.1:chr17:1474645:-	1,52	-
chr17	1472143	1472144	ENSG00000197879.17:ENST00000648446.1:chr17:1472143:-	1,52	-
chr17	1471303	1471304	ENSG00000197879.17:ENST00000648446.1:chr17:1471303:-	1,52	-
chr17	1471318	1471319	ENSG00000197879.17:ENST00000648446.1:chr17:1471318:-	1,52	-
chr17	1471325	1471326	ENSG00000197879.17:ENST00000648446.1:chr17:1471325:-	1,52	-
chr17	1471130	1471131	ENSG00000197879.17:ENST00000648446.1:chr17:1471130:-	1,52	-
chr17	1470270	1470271	ENSG00000197879.17:ENST00000648446.1:chr17:1470270:-	1,52	-
chr17	1470306	1470307	ENSG00000197879.17:ENST00000648446.1:chr17:1470306:-	1,52	-
chr17	1469578	1469579	ENSG00000197879.17:ENST00000648446.1:chr17:1469578:-	1,52	-
chr17	1469609	1469610	ENSG00000197879.17:ENST00000648446.1:chr17:1469609:-	2,52	-
chr17	1468442	1468443	ENSG00000197879.17:ENST00000648446.1:chr17:1468442:-	1,52	-
chr17	1468084	1468085	ENSG00000197879.17:ENST00000648446.1:chr17:1468084:-	1,52	-
chr17	1467496	1467497	ENSG00000197879.17:ENST00000648446.1:chr17:1467496:-	1,52	-
chr17	1467256	1467257	ENSG00000197879.17:ENST00000648446.1:chr17:1467256:-	1,52	-
chr17	1467291	1467292	ENSG00000197879.17:ENST00000648446.1:chr17:1467291:-	1,52	-
chr17	8382184	8382185	ENSG00000161970.15:ENST00000648839.1:chr17:8382184:-	2191	-
chr17	8382218	8382219	ENSG00000161970.15:ENST00000648839.1:chr17:8382218:-	1191	-
chr17	8382238	8382239	ENSG00000161970.15:ENST00000648839.1:chr17:8382238:-	2191	-
chr17	8382242	8382243	ENSG00000161970.15:ENST00000648839.1:chr17:8382242:-	1191	-
chr17	8382253	8382254	ENSG00000161970.15:ENST00000648839.1:chr17:8382253:-	1191	-
chr17	8382287	8382288	ENSG00000161970.15:ENST00000648839.1:chr17:8382287:-	2191	-
chr17	8379798	8379799	ENSG00000161970.15:ENST00000648839.1:chr17:8379798:-	1191	-
chr17	8379861	8379862	ENSG00000161970.15:ENST00000648839.1:chr17:8379861:-	2191	-
chr17	8379891	8379892	ENSG00000161970.15:ENST00000648839.1:chr17:8379891:-	1191	-
chr17	8379908	8379909	ENSG00000161970.15:ENST00000648839.1:chr17:8379908:-	1191	-
chr17	8379921	8379922	ENSG00000161970.15:ENST00000648839.1:chr17:8379921:-	1191	-
chr17	8379923	8379924	ENSG00000161970.15:ENST00000648839.1:chr17:8379923:-	1191	-
chr17	8379929	8379930	ENSG00000161970.15:ENST00000648839.1:chr17:8379929:-	1191	-
chr17	8377571	8377572	ENSG00000161970.15:ENST00000648839.1:chr17:8377571:-	1191	-
chr17	8377585	8377586	ENSG00000161970.15:ENST00000648839.1:chr17:8377585:-	2191	-
chr17	8377644	8377645	ENSG00000161970.15:ENST00000648839.1:chr17:8377644:-	1191	-
chr17	8377665	8377666	ENSG00000161970.15:ENST00000648839.1:chr17:8377665:-	3191	-
chr17	8377670	8377671	ENSG00000161970.15:ENST00000648839.1:chr17:8377670:-	2191	-
chr17	8377681	8377682	ENSG00000161970.15:ENST00000648839.1:chr17:8377681:-	2191	-
chr17	8377683	8377684	ENSG00000161970.15:ENST00000648839.1:chr17:8377683:-	1191	-
chr17	80146793	80146794	ENSG00000141543.12:ENST00000649764.2:chr17:80146793:-	41047	-
chr17	80146799	80146800	ENSG00000141543.12:ENST00000649764.2:chr17:80146799:-	41047	-
chr17	80146802	80146803	ENSG00000141543.12:ENST00000649764.2:chr17:80146802:-	11047	-
chr17	80146810	80146811	ENSG00000141543.12:ENST00000649764.2:chr17:80146810:-	11047	-
chr17	80146836	80146837	ENSG00000141543.12:ENST00000649764.2:chr17:80146836:-	31045	-
chr17	80146841	80146842	ENSG00000141543.12:ENST00000649764.2:chr17:80146841:-	41045	-
chr17	80146851	80146852	ENSG00000141543.12:ENST00000649764.2:chr17:80146851:-	31045	-
chr17	80146926	80146927	ENSG00000141543.12:ENST00000649764.2:chr17:80146926:-	11040	-
chr17	80146934	80146935	ENSG00000141543.12:ENST00000649764.2:chr17:80146934:-	11039	-
chr17	80146935	80146936	ENSG00000141543.12:ENST00000649764.2:chr17:80146935:-	11040	-
chr17	80146944	80146945	ENSG00000141543.12:ENST00000649764.2:chr17:80146944:-	11040	-
chr17	80144176	80144177	ENSG00000141543.12:ENST00000649764.2:chr17:80144176:-	31054	-
chr17	80144194	80144195	ENSG00000141543.12:ENST00000649764.2:chr17:80144194:-	11053	-
chr17	80144206	80144207	ENSG00000141543.12:ENST00000649764.2:chr17:80144206:-	21053	-
chr17	80144214	80144215	ENSG00000141543.12:ENST00000649764.2:chr17:80144214:-	11051	-
chr17	80144228	80144229	ENSG00000141543.12:ENST00000649764.2:chr17:80144228:-	11052	-
chr17	80144232	80144233	ENSG00000141543.12:ENST00000649764.2:chr17:80144232:-	21051	-
chr17	80141799	80141800	ENSG00000141543.12:ENST00000649764.2:chr17:80141799:-	11056	-
chr17	80141802	80141803	ENSG00000141543.12:ENST00000649764.2:chr17:80141802:-	11057	-
chr17	80141818	80141819	ENSG00000141543.12:ENST00000649764.2:chr17:80141818:-	11056	-
chr17	80141833	80141834	ENSG00000141543.12:ENST00000649764.2:chr17:80141833:-	31056	-
chr17	80141845	80141846	ENSG00000141543.12:ENST00000649764.2:chr17:80141845:-	11055	-
chr17	80141334	80141335	ENSG00000141543.12:ENST00000649764.2:chr17:80141334:-	21057	-
chr17	80141346	80141347	ENSG00000141543.12:ENST00000649764.2:chr17:80141346:-	31057	-
chr17	80141350	80141351	ENSG00000141543.12:ENST00000649764.2:chr17:80141350:-	11057	-
chr17	80140024	80140025	ENSG00000141543.12:ENST00000649764.2:chr17:80140024:-	21060	-
chr17	80140043	80140044	ENSG00000141543.12:ENST00000649764.2:chr17:80140043:-	11060	-
chr17	80140062	80140063	ENSG00000141543.12:ENST00000649764.2:chr17:80140062:-	11058	-
chr17	80140081	80140082	ENSG00000141543.12:ENST00000649764.2:chr17:80140081:-	11058	-
chr17	80140106	80140107	ENSG00000141543.12:ENST00000649764.2:chr17:80140106:-	11057	-
chr17	80140125	80140126	ENSG00000141543.12:ENST00000649764.2:chr17:80140125:-	11056	-
chr17	80139716	80139717	ENSG00000141543.12:ENST00000649764.2:chr17:80139716:-	11061	-
chr17	80139720	80139721	ENSG00000141543.12:ENST00000649764.2:chr17:80139720:-	21060	-
chr17	80139021	80139022	ENSG00000141543.12:ENST00000649764.2:chr17:80139021:-	11062	-
chr17	80139058	80139059	ENSG00000141543.12:ENST00000649764.2:chr17:80139058:-	21062	-
chr17	80139062	80139063	ENSG00000141543.12:ENST00000649764.2:chr17:80139062:-	61062	-
chr17	80139072	80139073	ENSG00000141543.12:ENST00000649764.2:chr17:80139072:-	11062	-
chr17	80139081	80139082	ENSG00000141543.12:ENST00000649764.2:chr17:80139081:-	31061	-
chr17	80139084	80139085	ENSG00000141543.12:ENST00000649764.2:chr17:80139084:-	11061	-
chr17	80139089	80139090	ENSG00000141543.12:ENST00000649764.2:chr17:80139089:-	11061	-
chr17	80139100	80139101	ENSG00000141543.12:ENST00000649764.2:chr17:80139100:-	21061	-
chr17	80139111	80139112	ENSG00000141543.12:ENST00000649764.2:chr17:80139111:-	11061	-
chr17	80139120	80139121	ENSG00000141543.12:ENST00000649764.2:chr17:80139120:-	11061	-
chr17	80139127	80139128	ENSG00000141543.12:ENST00000649764.2:chr17:80139127:-	21061	-
chr17	80139133	80139134	ENSG00000141543.12:ENST00000649764.2:chr17:80139133:-	31061	-
chr17	80138177	80138178	ENSG00000141543.12:ENST00000649764.2:chr17:80138177:-	11064	-
chr17	80138185	80138186	ENSG00000141543.12:ENST00000649764.2:chr17:80138185:-	31064	-
chr17	80138189	80138190	ENSG00000141543.12:ENST00000649764.2:chr17:80138189:-	71064	-
chr17	80138210	80138211	ENSG00000141543.12:ENST00000649764.2:chr17:80138210:-	41064	-
chr17	80138243	80138244	ENSG00000141543.12:ENST00000649764.2:chr17:80138243:-	11062	-
chr17	80138258	80138259	ENSG00000141543.12:ENST00000649764.2:chr17:80138258:-	11062	-
chr17	80138266	80138267	ENSG00000141543.12:ENST00000649764.2:chr17:80138266:-	11062	-
chr17	80137399	80137400	ENSG00000141543.12:ENST00000649764.2:chr17:80137399:-	11066	-
chr17	80137411	80137412	ENSG00000141543.12:ENST00000649764.2:chr17:80137411:-	21066	-
chr17	80137462	80137463	ENSG00000141543.12:ENST00000649764.2:chr17:80137462:-	11065	-
chr17	80137465	80137466	ENSG00000141543.12:ENST00000649764.2:chr17:80137465:-	11065	-
chr17	80137487	80137488	ENSG00000141543.12:ENST00000649764.2:chr17:80137487:-	31064	-
chr17	80136265	80136266	ENSG00000141543.12:ENST00000649764.2:chr17:80136265:-	11066	-
chr17	80136327	80136328	ENSG00000141543.12:ENST00000649764.2:chr17:80136327:-	11066	-
chr17	80136012	80136013	ENSG00000141543.12:ENST00000649764.2:chr17:80136012:-	11066	-
chr17	80136032	80136033	ENSG00000141543.12:ENST00000649764.2:chr17:80136032:-	21066	-
chr17	80136046	80136047	ENSG00000141543.12:ENST00000649764.2:chr17:80136046:-	11066	-
chr17	80136055	80136056	ENSG00000141543.12:ENST00000649764.2:chr17:80136055:-	11066	-
chr17	80136058	80136059	ENSG00000141543.12:ENST00000649764.2:chr17:80136058:-	11066	-
chr17	80136064	80136065	ENSG00000141543.12:ENST00000649764.2:chr17:80136064:-	11066	-
chr17	80136067	80136068	ENSG00000141543.12:ENST00000649764.2:chr17:80136067:-	21066	-
chr17	80136114	80136115	ENSG00000141543.12:ENST00000649764.2:chr17:80136114:-	11066	-
chr18	8609495	8609496	ENSG00000206418.5:ENST00000649141.2:chr18:8609495:+	1,1	+
chr18	58733534	58733535	ENSG00000172175.15:ENST00000649217.2:chr18:58733534:+	1,2	+
chr19	1233566	1233567	ENSG00000099625.13:ENST00000650044.1:chr19:1233566:-	1,1	-
chr19	1229751	1229752	ENSG00000099625.13:ENST00000650044.1:chr19:1229751:-	1,1	-
chr19	41986172	41986173	ENSG00000105409.19:ENST00000648268.1:chr19:41986172:-	1,1	-
chr19	41985364	41985365	ENSG00000105409.19:ENST00000648268.1:chr19:41985364:-	1,1	-
chr19	43780746	43780747	ENSG00000104783.14:ENST00000648319.1:chr19:43780746:-	1174	-
chr19	43780773	43780774	ENSG00000104783.14:ENST00000648319.1:chr19:43780773:-	1169	-
chr19	43780788	43780789	ENSG00000104783.14:ENST00000648319.1:chr19:43780788:-	1169	-
chr19	43780836	43780837	ENSG00000104783.14:ENST00000648319.1:chr19:43780836:-	1153	-
chr19	43776557	43776558	ENSG00000104783.14:ENST00000648319.1:chr19:43776557:-	1175	-
chr19	43776567	43776568	ENSG00000104783.14:ENST00000648319.1:chr19:43776567:-	1175	-
chr19	43776581	43776582	ENSG00000104783.14:ENST00000648319.1:chr19:43776581:-	1175	-
chr19	43776600	43776601	ENSG00000104783.14:ENST00000648319.1:chr19:43776600:-	1175	-
chr19	43776604	43776605	ENSG00000104783.14:ENST00000648319.1:chr19:43776604:-	1175	-
chr19	43776618	43776619	ENSG00000104783.14:ENST00000648319.1:chr19:43776618:-	1175	-
chr19	43776624	43776625	ENSG00000104783.14:ENST00000648319.1:chr19:43776624:-	2175	-
chr19	43774218	43774219	ENSG00000104783.14:ENST00000648319.1:chr19:43774218:-	1178	-
chr19	43774221	43774222	ENSG00000104783.14:ENST00000648319.1:chr19:43774221:-	1178	-
chr19	43774237	43774238	ENSG00000104783.14:ENST00000648319.1:chr19:43774237:-	1178	-
chr19	43774252	43774253	ENSG00000104783.14:ENST00000648319.1:chr19:43774252:-	1178	-
chr19	43774255	43774256	ENSG00000104783.14:ENST00000648319.1:chr19:43774255:-	1178	-
chr19	43774269	43774270	ENSG00000104783.14:ENST00000648319.1:chr19:43774269:-	1178	-
chr19	43774271	43774272	ENSG00000104783.14:ENST00000648319.1:chr19:43774271:-	1178	-
chr19	43774277	43774278	ENSG00000104783.14:ENST00000648319.1:chr19:43774277:-	1178	-
chr19	43774328	43774329	ENSG00000104783.14:ENST00000648319.1:chr19:43774328:-	1178	-
chr19	43774337	43774338	ENSG00000104783.14:ENST00000648319.1:chr19:43774337:-	2178	-
chr19	43774341	43774342	ENSG00000104783.14:ENST00000648319.1:chr19:43774341:-	1178	-
chr19	43774346	43774347	ENSG00000104783.14:ENST00000648319.1:chr19:43774346:-	3178	-
chr19	43774369	43774370	ENSG00000104783.14:ENST00000648319.1:chr19:43774369:-	1178	-
chr19	43772002	43772003	ENSG00000104783.14:ENST00000648319.1:chr19:43772002:-	1178	-
chr19	43772078	43772079	ENSG00000104783.14:ENST00000648319.1:chr19:43772078:-	1178	-
chr19	43769823	43769824	ENSG00000104783.14:ENST00000648319.1:chr19:43769823:-	1178	-
chr19	43769443	43769444	ENSG00000104783.14:ENST00000648319.1:chr19:43769443:-	1178	-
chr19	43768983	43768984	ENSG00000104783.14:ENST00000648319.1:chr19:43768983:-	2178	-
chr19	43768991	43768992	ENSG00000104783.14:ENST00000648319.1:chr19:43768991:-	1178	-
chr19	43767549	43767550	ENSG00000104783.14:ENST00000648319.1:chr19:43767549:-	1178	-
chr19	43767591	43767592	ENSG00000104783.14:ENST00000648319.1:chr19:43767591:-	2178	-
chr19	43767593	43767594	ENSG00000104783.14:ENST00000648319.1:chr19:43767593:-	1178	-
chr19	43767606	43767607	ENSG00000104783.14:ENST00000648319.1:chr19:43767606:-	1178	-
chr19	43767673	43767674	ENSG00000104783.14:ENST00000648319.1:chr19:43767673:-	2178	-
chr19	43767686	43767687	ENSG00000104783.14:ENST00000648319.1:chr19:43767686:-	1178	-
chr19	43767701	43767702	ENSG00000104783.14:ENST00000648319.1:chr19:43767701:-	1178	-
chr19	43767703	43767704	ENSG00000104783.14:ENST00000648319.1:chr19:43767703:-	1178	-
chr20	18510858	18510859	ENSG00000101310.17:ENST00000650089.1:chr20:18510858:+	1,22	+
chr20	18512270	18512271	ENSG00000101310.17:ENST00000650089.1:chr20:18512270:+	1,22	+
chr20	18524950	18524951	ENSG00000101310.17:ENST00000650089.1:chr20:18524950:+	1,22	+
chr20	18525825	18525826	ENSG00000101310.17:ENST00000650089.1:chr20:18525825:+	1,22	+
chr20	18526424	18526425	ENSG00000101310.17:ENST00000650089.1:chr20:18526424:+	1,22	+
chr20	18526505	18526506	ENSG00000101310.17:ENST00000650089.1:chr20:18526505:+	1,22	+
chr20	18554362	18554363	ENSG00000101310.17:ENST00000650089.1:chr20:18554362:+	1,22	+
chr20	18555148	18555149	ENSG00000101310.17:ENST00000650089.1:chr20:18555148:+	1,22	+
chr22	37655393	37655394	ENSG00000100092.24:ENST00000649765.2:chr22:37655393:+	1,5	+
chrX	77899577	77899578	ENSG00000131174.7:ENST00000650309.2:chrX:77899577:+	1113	+
chrX	77902644	77902645	ENSG00000131174.7:ENST00000650309.2:chrX:77902644:+	1113	+
chrX	77902653	77902654	ENSG00000131174.7:ENST00000650309.2:chrX:77902653:+	3113	+
chrX	77902690	77902691	ENSG00000131174.7:ENST00000650309.2:chrX:77902690:+	1113	+
chrX	77902701	77902702	ENSG00000131174.7:ENST00000650309.2:chrX:77902701:+	1113	+
chrX	77902706	77902707	ENSG00000131174.7:ENST00000650309.2:chrX:77902706:+	5113	+
chrX	77902729	77902730	ENSG00000131174.7:ENST00000650309.2:chrX:77902729:+	1113	+
chrX	77902741	77902742	ENSG00000131174.7:ENST00000650309.2:chrX:77902741:+	3113	+
chrX	77905192	77905193	ENSG00000131174.7:ENST00000650309.2:chrX:77905192:+	1113	+
chrX	77905255	77905256	ENSG00000131174.7:ENST00000650309.2:chrX:77905255:+	2113	+
chr2	27599980	27599981	ENSG00000243943.10:ENST00000556601.5:chr2:27599980:+	1,6	+
chr2	27615228	27615229	ENSG00000243943.10:ENST00000556601.5:chr2:27615228:+	1,6	+
chr14	20996258	20996259	ENSG00000165792.18:ENST00000556670.6:chr14:20996258:+	1,7	+
chr14	24145441	24145442	ENSG00000100911.16:ENST00000560410.5:chr14:24145441:-	1,1	-
chr14	35000964	35000965	ENSG00000100883.13:ENST00000556994.5:chr14:35000964:+	1,9	+
chr14	35007316	35007317	ENSG00000100883.13:ENST00000556994.5:chr14:35007316:+	1,9	+
chr14	35007376	35007377	ENSG00000100883.13:ENST00000556994.5:chr14:35007376:+	1,9	+
chr14	35013847	35013848	ENSG00000100883.13:ENST00000556994.5:chr14:35013847:+	1,9	+
chr14	35014826	35014827	ENSG00000100883.13:ENST00000556994.5:chr14:35014826:+	1,9	+
chr14	35022916	35022917	ENSG00000100883.13:ENST00000556994.5:chr14:35022916:+	1,9	+
chr14	35028140	35028141	ENSG00000100883.13:ENST00000556994.5:chr14:35028140:+	1,9	+
chr14	35403710	35403711	ENSG00000100906.11:ENST00000557140.5:chr14:35403710:-	1,4	-
chr14	53951960	53951961	ENSG00000125378.16:ENST00000559087.5:chr14:53951960:-	1280	-
chr14	53951979	53951980	ENSG00000125378.16:ENST00000559087.5:chr14:53951979:-	1280	-
chr14	53952041	53952042	ENSG00000125378.16:ENST00000559087.5:chr14:53952041:-	1280	-
chr14	53952173	53952174	ENSG00000125378.16:ENST00000559087.5:chr14:53952173:-	1280	-
chr14	53950134	53950135	ENSG00000125378.16:ENST00000559087.5:chr14:53950134:-	1280	-
chr14	53950208	53950209	ENSG00000125378.16:ENST00000559087.5:chr14:53950208:-	1280	-
chr14	53950225	53950226	ENSG00000125378.16:ENST00000559087.5:chr14:53950225:-	1280	-
chr14	53950235	53950236	ENSG00000125378.16:ENST00000559087.5:chr14:53950235:-	1280	-
chr14	53950262	53950263	ENSG00000125378.16:ENST00000559087.5:chr14:53950262:-	1280	-
chr14	53950307	53950308	ENSG00000125378.16:ENST00000559087.5:chr14:53950307:-	1280	-
chr14	53950310	53950311	ENSG00000125378.16:ENST00000559087.5:chr14:53950310:-	1280	-
chr14	53950363	53950364	ENSG00000125378.16:ENST00000559087.5:chr14:53950363:-	1280	-
chr14	53950698	53950699	ENSG00000125378.16:ENST00000559087.5:chr14:53950698:-	1278	-
chr14	53950783	53950784	ENSG00000125378.16:ENST00000559087.5:chr14:53950783:-	1280	-
chr14	53950835	53950836	ENSG00000125378.16:ENST00000559087.5:chr14:53950835:-	2280	-
chr14	59495117	59495118	ENSG00000050130.18:ENST00000554271.5:chr14:59495117:+	1,5	+
chr14	69442231	69442232	ENSG00000029364.12:ENST00000555840.5:chr14:69442231:+	1,2	+
chr14	69458431	69458432	ENSG00000029364.12:ENST00000555840.5:chr14:69458431:+	1,3	+
chr14	69458581	69458582	ENSG00000029364.12:ENST00000555840.5:chr14:69458581:+	1,3	+
chr14	73284221	73284222	ENSG00000133961.21:ENST00000557597.5:chr14:73284221:-	1,14	-
chr14	73279288	73279289	ENSG00000133961.21:ENST00000557597.5:chr14:73279288:-	1,14	-
chr14	73276607	73276608	ENSG00000133961.21:ENST00000557597.5:chr14:73276607:-	1,14	-
chr14	73276722	73276723	ENSG00000133961.21:ENST00000557597.5:chr14:73276722:-	1,14	-
chr14	73276922	73276923	ENSG00000133961.21:ENST00000557597.5:chr14:73276922:-	1,14	-
chr14	74494093	74494094	ENSG00000165898.14:ENST00000556816.6:chr14:74494093:+	1,96	+
chr14	74494351	74494352	ENSG00000165898.14:ENST00000556816.6:chr14:74494351:+	1,96	+
chr14	74494359	74494360	ENSG00000165898.14:ENST00000556816.6:chr14:74494359:+	1,96	+
chr14	74494835	74494836	ENSG00000165898.14:ENST00000556816.6:chr14:74494835:+	2,96	+
chr14	74494984	74494985	ENSG00000165898.14:ENST00000556816.6:chr14:74494984:+	1100	+
chr14	74494986	74494987	ENSG00000165898.14:ENST00000556816.6:chr14:74494986:+	1100	+
chr14	88563671	88563672	ENSG00000100722.20:ENST00000556945.5:chr14:88563671:+	1,15	+
chr14	88568109	88568110	ENSG00000100722.20:ENST00000556945.5:chr14:88568109:+	1,15	+
chr14	88572128	88572129	ENSG00000100722.20:ENST00000556945.5:chr14:88572128:+	1,15	+
chr14	88572603	88572604	ENSG00000100722.20:ENST00000556945.5:chr14:88572603:+	1,16	+
chr14	88596736	88596737	ENSG00000100722.20:ENST00000556945.5:chr14:88596736:+	1,16	+
chr14	88596762	88596763	ENSG00000100722.20:ENST00000556945.5:chr14:88596762:+	1,16	+
chr14	92717388	92717389	ENSG00000100600.15:ENST00000555699.5:chr14:92717388:-	1,3	-
chr14	92713828	92713829	ENSG00000100600.15:ENST00000555699.5:chr14:92713828:-	1,3	-
chr14	94101925	94101926	ENSG00000165948.11:ENST00000553664.1:chr14:94101925:+	1,1	+
chr14	103673078	103673079	ENSG00000126214.21:ENST00000557575.5:chr14:103673078:+	1,4	+
chr14	104938790	104938791	ENSG00000185567.7:ENST00000557457.1:chr14:104938790:-	1,5	-
chr15	41394869	41394870	ENSG00000137806.10:ENST00000560978.2:chr15:41394869:-	1,9	-
chr15	49201228	49201229	ENSG00000156958.15:ENST00000560031.6:chr15:49201228:+	1,3	+
chr15	49319643	49319644	ENSG00000156958.15:ENST00000560031.6:chr15:49319643:+	1,3	+
chr15	64096113	64096114	ENSG00000028528.15:ENST00000559844.6:chr15:64096113:+	1185	+
chr15	64096132	64096133	ENSG00000028528.15:ENST00000559844.6:chr15:64096132:+	2195	+
chr15	64096147	64096148	ENSG00000028528.15:ENST00000559844.6:chr15:64096147:+	1195	+
chr15	64096153	64096154	ENSG00000028528.15:ENST00000559844.6:chr15:64096153:+	1195	+
chr15	64112581	64112582	ENSG00000028528.15:ENST00000559844.6:chr15:64112581:+	1196	+
chr15	64112587	64112588	ENSG00000028528.15:ENST00000559844.6:chr15:64112587:+	1196	+
chr15	64112597	64112598	ENSG00000028528.15:ENST00000559844.6:chr15:64112597:+	2196	+
chr15	64112600	64112601	ENSG00000028528.15:ENST00000559844.6:chr15:64112600:+	1196	+
chr15	64112611	64112612	ENSG00000028528.15:ENST00000559844.6:chr15:64112611:+	1195	+
chr15	64118122	64118123	ENSG00000028528.15:ENST00000559844.6:chr15:64118122:+	1196	+
chr15	64118190	64118191	ENSG00000028528.15:ENST00000559844.6:chr15:64118190:+	1197	+
chr15	64118233	64118234	ENSG00000028528.15:ENST00000559844.6:chr15:64118233:+	2197	+
chr15	64118824	64118825	ENSG00000028528.15:ENST00000559844.6:chr15:64118824:+	3197	+
chr15	64118836	64118837	ENSG00000028528.15:ENST00000559844.6:chr15:64118836:+	1197	+
chr15	64123526	64123527	ENSG00000028528.15:ENST00000559844.6:chr15:64123526:+	1197	+
chr15	64123530	64123531	ENSG00000028528.15:ENST00000559844.6:chr15:64123530:+	2197	+
chr15	64123538	64123539	ENSG00000028528.15:ENST00000559844.6:chr15:64123538:+	1197	+
chr15	64126083	64126084	ENSG00000028528.15:ENST00000559844.6:chr15:64126083:+	1197	+
chr15	64126087	64126088	ENSG00000028528.15:ENST00000559844.6:chr15:64126087:+	1197	+
chr15	64126170	64126171	ENSG00000028528.15:ENST00000559844.6:chr15:64126170:+	1197	+
chr15	64126212	64126213	ENSG00000028528.15:ENST00000559844.6:chr15:64126212:+	1197	+
chr15	64127206	64127207	ENSG00000028528.15:ENST00000559844.6:chr15:64127206:+	1197	+
chr15	64127212	64127213	ENSG00000028528.15:ENST00000559844.6:chr15:64127212:+	1197	+
chr15	64127767	64127768	ENSG00000028528.15:ENST00000559844.6:chr15:64127767:+	1197	+
chr15	64127778	64127779	ENSG00000028528.15:ENST00000559844.6:chr15:64127778:+	1197	+
chr15	64130007	64130008	ENSG00000028528.15:ENST00000559844.6:chr15:64130007:+	1197	+
chr15	64130025	64130026	ENSG00000028528.15:ENST00000559844.6:chr15:64130025:+	1197	+
chr15	64130275	64130276	ENSG00000028528.15:ENST00000559844.6:chr15:64130275:+	1197	+
chr15	64130281	64130282	ENSG00000028528.15:ENST00000559844.6:chr15:64130281:+	1197	+
chr15	64131740	64131741	ENSG00000028528.15:ENST00000559844.6:chr15:64131740:+	1197	+
chr15	64131755	64131756	ENSG00000028528.15:ENST00000559844.6:chr15:64131755:+	2197	+
chr15	64131820	64131821	ENSG00000028528.15:ENST00000559844.6:chr15:64131820:+	1197	+
chr15	64131828	64131829	ENSG00000028528.15:ENST00000559844.6:chr15:64131828:+	2197	+
chr15	64131864	64131865	ENSG00000028528.15:ENST00000559844.6:chr15:64131864:+	3197	+
chr15	64134688	64134689	ENSG00000028528.15:ENST00000559844.6:chr15:64134688:+	3197	+
chr15	64136345	64136346	ENSG00000028528.15:ENST00000559844.6:chr15:64136345:+	2197	+
chr15	64136886	64136887	ENSG00000028528.15:ENST00000559844.6:chr15:64136886:+	1197	+
chr15	64136895	64136896	ENSG00000028528.15:ENST00000559844.6:chr15:64136895:+	3197	+
chr15	64136909	64136910	ENSG00000028528.15:ENST00000559844.6:chr15:64136909:+	2197	+
chr15	64136919	64136920	ENSG00000028528.15:ENST00000559844.6:chr15:64136919:+	2197	+
chr15	78542212	78542213	ENSG00000041357.16:ENST00000559082.5:chr15:78542212:+	1,22	+
chr15	78542492	78542493	ENSG00000041357.16:ENST00000559082.5:chr15:78542492:+	2,22	+
chr15	78544247	78544248	ENSG00000041357.16:ENST00000559082.5:chr15:78544247:+	1,27	+
chr15	78544884	78544885	ENSG00000041357.16:ENST00000559082.5:chr15:78544884:+	1,27	+
chr15	78545664	78545665	ENSG00000041357.16:ENST00000559082.5:chr15:78545664:+	2,27	+
chr15	78546634	78546635	ENSG00000041357.16:ENST00000559082.5:chr15:78546634:+	1,27	+
chr15	78546655	78546656	ENSG00000041357.16:ENST00000559082.5:chr15:78546655:+	2,27	+
chr15	78548825	78548826	ENSG00000041357.16:ENST00000559082.5:chr15:78548825:+	1,27	+
chr15	78548832	78548833	ENSG00000041357.16:ENST00000559082.5:chr15:78548832:+	1,27	+
chr15	78548839	78548840	ENSG00000041357.16:ENST00000559082.5:chr15:78548839:+	1,27	+
chr15	80120452	80120453	ENSG00000086666.19:ENST00000559835.5:chr15:80120452:+	1,5	+
chr15	89263962	89263963	ENSG00000140525.19:ENST00000567996.5:chr15:89263962:+	1,1	+
chr16	1778495	1778496	ENSG00000162032.16:ENST00000566339.6:chr16:1778495:-	1,52	-
chr16	1778595	1778596	ENSG00000162032.16:ENST00000566339.6:chr16:1778595:-	1,52	-
chr16	1778166	1778167	ENSG00000162032.16:ENST00000566339.6:chr16:1778166:-	1,52	-
chr16	1778232	1778233	ENSG00000162032.16:ENST00000566339.6:chr16:1778232:-	1,52	-
chr16	1778012	1778013	ENSG00000162032.16:ENST00000566339.6:chr16:1778012:-	1,52	-
chr16	1777810	1777811	ENSG00000162032.16:ENST00000566339.6:chr16:1777810:-	1,52	-
chr16	1777844	1777845	ENSG00000162032.16:ENST00000566339.6:chr16:1777844:-	1,52	-
chr16	1777150	1777151	ENSG00000162032.16:ENST00000566339.6:chr16:1777150:-	1,52	-
chr16	1777231	1777232	ENSG00000162032.16:ENST00000566339.6:chr16:1777231:-	1,52	-
chr16	1777234	1777235	ENSG00000162032.16:ENST00000566339.6:chr16:1777234:-	1,52	-
chr16	85805823	85805824	ENSG00000131143.10:ENST00000562336.5:chr16:85805823:+	1,3	+
chr16	85806804	85806805	ENSG00000131143.10:ENST00000562336.5:chr16:85806804:+	1,3	+
chr1	1228541	1228542	ENSG00000078808.19:ENST00000660930.1:chr1:1228541:-	1,26	-
chr1	1228787	1228788	ENSG00000078808.19:ENST00000660930.1:chr1:1228787:-	1,26	-
chr5	43609273	43609274	ENSG00000112992.18:ENST00000660676.1:chr5:43609273:+	1,1	+
chr11	73978254	73978255	ENSG00000175567.11:ENST00000663595.2:chr11:73978254:-	1366	-
chr11	73978261	73978262	ENSG00000175567.11:ENST00000663595.2:chr11:73978261:-	1366	-
chr11	73978271	73978272	ENSG00000175567.11:ENST00000663595.2:chr11:73978271:-	1366	-
chr11	73978288	73978289	ENSG00000175567.11:ENST00000663595.2:chr11:73978288:-	1366	-
chr11	73978300	73978301	ENSG00000175567.11:ENST00000663595.2:chr11:73978300:-	1366	-
chr11	73978310	73978311	ENSG00000175567.11:ENST00000663595.2:chr11:73978310:-	1366	-
chr11	73978337	73978338	ENSG00000175567.11:ENST00000663595.2:chr11:73978337:-	1365	-
chr11	73978343	73978344	ENSG00000175567.11:ENST00000663595.2:chr11:73978343:-	2365	-
chr11	73978358	73978359	ENSG00000175567.11:ENST00000663595.2:chr11:73978358:-	2365	-
chr11	73978366	73978367	ENSG00000175567.11:ENST00000663595.2:chr11:73978366:-	1364	-
chr11	73977899	73977900	ENSG00000175567.11:ENST00000663595.2:chr11:73977899:-	2367	-
chr11	73977985	73977986	ENSG00000175567.11:ENST00000663595.2:chr11:73977985:-	1367	-
chr11	73977999	73978000	ENSG00000175567.11:ENST00000663595.2:chr11:73977999:-	1367	-
chr11	73978019	73978020	ENSG00000175567.11:ENST00000663595.2:chr11:73978019:-	3367	-
chr11	73978092	73978093	ENSG00000175567.11:ENST00000663595.2:chr11:73978092:-	1366	-
chr11	73976829	73976830	ENSG00000175567.11:ENST00000663595.2:chr11:73976829:-	1367	-
chr11	73976874	73976875	ENSG00000175567.11:ENST00000663595.2:chr11:73976874:-	1367	-
chr11	73976922	73976923	ENSG00000175567.11:ENST00000663595.2:chr11:73976922:-	1367	-
chr11	73976977	73976978	ENSG00000175567.11:ENST00000663595.2:chr11:73976977:-	1367	-
chr11	73976994	73976995	ENSG00000175567.11:ENST00000663595.2:chr11:73976994:-	1367	-
chr11	73976677	73976678	ENSG00000175567.11:ENST00000663595.2:chr11:73976677:-	1368	-
chr11	73976680	73976681	ENSG00000175567.11:ENST00000663595.2:chr11:73976680:-	1368	-
chr11	73976704	73976705	ENSG00000175567.11:ENST00000663595.2:chr11:73976704:-	2367	-
chr11	73975498	73975499	ENSG00000175567.11:ENST00000663595.2:chr11:73975498:-	1370	-
chr11	73975529	73975530	ENSG00000175567.11:ENST00000663595.2:chr11:73975529:-	1369	-
chr11	73975535	73975536	ENSG00000175567.11:ENST00000663595.2:chr11:73975535:-	1369	-
chr11	73975540	73975541	ENSG00000175567.11:ENST00000663595.2:chr11:73975540:-	1369	-
chr11	73975573	73975574	ENSG00000175567.11:ENST00000663595.2:chr11:73975573:-	3369	-
chr11	73975579	73975580	ENSG00000175567.11:ENST00000663595.2:chr11:73975579:-	1369	-
chr11	73975597	73975598	ENSG00000175567.11:ENST00000663595.2:chr11:73975597:-	1368	-
chr11	73975612	73975613	ENSG00000175567.11:ENST00000663595.2:chr11:73975612:-	2369	-
chr11	73975615	73975616	ENSG00000175567.11:ENST00000663595.2:chr11:73975615:-	1369	-
chr11	73975619	73975620	ENSG00000175567.11:ENST00000663595.2:chr11:73975619:-	1369	-
chr11	73975622	73975623	ENSG00000175567.11:ENST00000663595.2:chr11:73975622:-	1369	-
chr11	73975627	73975628	ENSG00000175567.11:ENST00000663595.2:chr11:73975627:-	1369	-
chr11	73975649	73975650	ENSG00000175567.11:ENST00000663595.2:chr11:73975649:-	2368	-
chr11	73975651	73975652	ENSG00000175567.11:ENST00000663595.2:chr11:73975651:-	1368	-
chr11	73975654	73975655	ENSG00000175567.11:ENST00000663595.2:chr11:73975654:-	3368	-
chr11	73975657	73975658	ENSG00000175567.11:ENST00000663595.2:chr11:73975657:-	1368	-
chr11	73975025	73975026	ENSG00000175567.11:ENST00000663595.2:chr11:73975025:-	1370	-
chr11	73975033	73975034	ENSG00000175567.11:ENST00000663595.2:chr11:73975033:-	1370	-
chr11	73975044	73975045	ENSG00000175567.11:ENST00000663595.2:chr11:73975044:-	1370	-
chr11	73975072	73975073	ENSG00000175567.11:ENST00000663595.2:chr11:73975072:-	1370	-
chr11	73975099	73975100	ENSG00000175567.11:ENST00000663595.2:chr11:73975099:-	1370	-
chr11	73975102	73975103	ENSG00000175567.11:ENST00000663595.2:chr11:73975102:-	1370	-
chr11	73975108	73975109	ENSG00000175567.11:ENST00000663595.2:chr11:73975108:-	1370	-
chrX	72196858	72196859	ENSG00000102309.15:ENST00000664196.1:chrX:72196858:+	1,11	+
chrX	72197496	72197497	ENSG00000102309.15:ENST00000664196.1:chrX:72197496:+	1,11	+
chr1	11745810	11745811	ENSG00000177674.16:ENST00000314340.10:chr1:11745810:+	1,66	+
chr1	11745819	11745820	ENSG00000177674.16:ENST00000314340.10:chr1:11745819:+	1,66	+
chr1	11747483	11747484	ENSG00000177674.16:ENST00000314340.10:chr1:11747483:+	2,67	+
chr1	11747523	11747524	ENSG00000177674.16:ENST00000314340.10:chr1:11747523:+	2,67	+
chr1	11748433	11748434	ENSG00000177674.16:ENST00000314340.10:chr1:11748433:+	1,67	+
chr1	11748496	11748497	ENSG00000177674.16:ENST00000314340.10:chr1:11748496:+	1,67	+
chr1	11748566	11748567	ENSG00000177674.16:ENST00000314340.10:chr1:11748566:+	1,67	+
chr1	11748569	11748570	ENSG00000177674.16:ENST00000314340.10:chr1:11748569:+	1,67	+
chr1	11750080	11750081	ENSG00000177674.16:ENST00000314340.10:chr1:11750080:+	1,68	+
chr1	11750091	11750092	ENSG00000177674.16:ENST00000314340.10:chr1:11750091:+	2,68	+
chr1	11750171	11750172	ENSG00000177674.16:ENST00000314340.10:chr1:11750171:+	1,68	+
chr1	43359249	43359250	ENSG00000117399.14:ENST00000310955.11:chr1:43359249:+	11428	+
chr1	43359269	43359270	ENSG00000117399.14:ENST00000310955.11:chr1:43359269:+	11425	+
chr1	43359287	43359288	ENSG00000117399.14:ENST00000310955.11:chr1:43359287:+	11428	+
chr1	43359302	43359303	ENSG00000117399.14:ENST00000310955.11:chr1:43359302:+	11428	+
chr1	43359304	43359305	ENSG00000117399.14:ENST00000310955.11:chr1:43359304:+	21428	+
chr1	43359309	43359310	ENSG00000117399.14:ENST00000310955.11:chr1:43359309:+	11427	+
chr1	43359310	43359311	ENSG00000117399.14:ENST00000310955.11:chr1:43359310:+	21428	+
chr1	43359319	43359320	ENSG00000117399.14:ENST00000310955.11:chr1:43359319:+	11428	+
chr1	43359352	43359353	ENSG00000117399.14:ENST00000310955.11:chr1:43359352:+	11428	+
chr1	43359355	43359356	ENSG00000117399.14:ENST00000310955.11:chr1:43359355:+	31427	+
chr1	43359356	43359357	ENSG00000117399.14:ENST00000310955.11:chr1:43359356:+	11428	+
chr1	43359392	43359393	ENSG00000117399.14:ENST00000310955.11:chr1:43359392:+	11427	+
chr1	43359495	43359496	ENSG00000117399.14:ENST00000310955.11:chr1:43359495:+	21427	+
chr1	43359509	43359510	ENSG00000117399.14:ENST00000310955.11:chr1:43359509:+	31428	+
chr1	43359518	43359519	ENSG00000117399.14:ENST00000310955.11:chr1:43359518:+	11426	+
chr1	43359523	43359524	ENSG00000117399.14:ENST00000310955.11:chr1:43359523:+	21428	+
chr1	43359549	43359550	ENSG00000117399.14:ENST00000310955.11:chr1:43359549:+	11428	+
chr1	43359554	43359555	ENSG00000117399.14:ENST00000310955.11:chr1:43359554:+	11428	+
chr1	43359556	43359557	ENSG00000117399.14:ENST00000310955.11:chr1:43359556:+	11428	+
chr1	43359566	43359567	ENSG00000117399.14:ENST00000310955.11:chr1:43359566:+	11428	+
chr1	43359586	43359587	ENSG00000117399.14:ENST00000310955.11:chr1:43359586:+	11427	+
chr1	43359616	43359617	ENSG00000117399.14:ENST00000310955.11:chr1:43359616:+	81427	+
chr1	43359743	43359744	ENSG00000117399.14:ENST00000310955.11:chr1:43359743:+	21428	+
chr1	43359783	43359784	ENSG00000117399.14:ENST00000310955.11:chr1:43359783:+	11428	+
chr1	43359802	43359803	ENSG00000117399.14:ENST00000310955.11:chr1:43359802:+	11428	+
chr1	43359805	43359806	ENSG00000117399.14:ENST00000310955.11:chr1:43359805:+	11428	+
chr1	43359814	43359815	ENSG00000117399.14:ENST00000310955.11:chr1:43359814:+	11427	+
chr1	43359815	43359816	ENSG00000117399.14:ENST00000310955.11:chr1:43359815:+	11428	+
chr1	43359993	43359994	ENSG00000117399.14:ENST00000310955.11:chr1:43359993:+	11428	+
chr1	43360012	43360013	ENSG00000117399.14:ENST00000310955.11:chr1:43360012:+	21426	+
chr1	43360031	43360032	ENSG00000117399.14:ENST00000310955.11:chr1:43360031:+	11428	+
chr1	43360046	43360047	ENSG00000117399.14:ENST00000310955.11:chr1:43360046:+	11428	+
chr1	43360049	43360050	ENSG00000117399.14:ENST00000310955.11:chr1:43360049:+	21422	+
chr1	43360065	43360066	ENSG00000117399.14:ENST00000310955.11:chr1:43360065:+	11426	+
chr1	43360076	43360077	ENSG00000117399.14:ENST00000310955.11:chr1:43360076:+	21428	+
chr1	43360199	43360200	ENSG00000117399.14:ENST00000310955.11:chr1:43360199:+	41428	+
chr1	43360290	43360291	ENSG00000117399.14:ENST00000310955.11:chr1:43360290:+	11427	+
chr1	43360324	43360325	ENSG00000117399.14:ENST00000310955.11:chr1:43360324:+	11428	+
chr1	43360325	43360326	ENSG00000117399.14:ENST00000310955.11:chr1:43360325:+	11428	+
chr1	43360334	43360335	ENSG00000117399.14:ENST00000310955.11:chr1:43360334:+	11428	+
chr1	43360373	43360374	ENSG00000117399.14:ENST00000310955.11:chr1:43360373:+	11428	+
chr1	43360525	43360526	ENSG00000117399.14:ENST00000310955.11:chr1:43360525:+	11427	+
chr1	43360528	43360529	ENSG00000117399.14:ENST00000310955.11:chr1:43360528:+	11428	+
chr1	43360547	43360548	ENSG00000117399.14:ENST00000310955.11:chr1:43360547:+	11427	+
chr1	43360575	43360576	ENSG00000117399.14:ENST00000310955.11:chr1:43360575:+	11428	+
chr1	43360584	43360585	ENSG00000117399.14:ENST00000310955.11:chr1:43360584:+	11427	+
chr1	43360737	43360738	ENSG00000117399.14:ENST00000310955.11:chr1:43360737:+	21428	+
chr1	43360739	43360740	ENSG00000117399.14:ENST00000310955.11:chr1:43360739:+	31428	+
chr1	43360743	43360744	ENSG00000117399.14:ENST00000310955.11:chr1:43360743:+	21428	+
chr1	43360756	43360757	ENSG00000117399.14:ENST00000310955.11:chr1:43360756:+	21428	+
chr1	43360847	43360848	ENSG00000117399.14:ENST00000310955.11:chr1:43360847:+	41428	+
chr1	43360876	43360877	ENSG00000117399.14:ENST00000310955.11:chr1:43360876:+	11428	+
chr1	43360928	43360929	ENSG00000117399.14:ENST00000310955.11:chr1:43360928:+	21428	+
chr1	43360936	43360937	ENSG00000117399.14:ENST00000310955.11:chr1:43360936:+	11428	+
chr1	43360938	43360939	ENSG00000117399.14:ENST00000310955.11:chr1:43360938:+	21424	+
chr1	43360946	43360947	ENSG00000117399.14:ENST00000310955.11:chr1:43360946:+	21428	+
chr1	43360957	43360958	ENSG00000117399.14:ENST00000310955.11:chr1:43360957:+	11428	+
chr1	43361134	43361135	ENSG00000117399.14:ENST00000310955.11:chr1:43361134:+	11427	+
chr1	43361159	43361160	ENSG00000117399.14:ENST00000310955.11:chr1:43361159:+	31428	+
chr1	43361179	43361180	ENSG00000117399.14:ENST00000310955.11:chr1:43361179:+	21428	+
chr1	43361182	43361183	ENSG00000117399.14:ENST00000310955.11:chr1:43361182:+	11428	+
chr1	43361184	43361185	ENSG00000117399.14:ENST00000310955.11:chr1:43361184:+	11428	+
chr1	43361236	43361237	ENSG00000117399.14:ENST00000310955.11:chr1:43361236:+	21428	+
chr1	43361240	43361241	ENSG00000117399.14:ENST00000310955.11:chr1:43361240:+	21427	+
chr1	43361241	43361242	ENSG00000117399.14:ENST00000310955.11:chr1:43361241:+	11428	+
chr1	43362199	43362200	ENSG00000117399.14:ENST00000310955.11:chr1:43362199:+	11428	+
chr1	43362205	43362206	ENSG00000117399.14:ENST00000310955.11:chr1:43362205:+	11427	+
chr1	43362213	43362214	ENSG00000117399.14:ENST00000310955.11:chr1:43362213:+	21428	+
chr1	43362216	43362217	ENSG00000117399.14:ENST00000310955.11:chr1:43362216:+	11428	+
chr1	43362217	43362218	ENSG00000117399.14:ENST00000310955.11:chr1:43362217:+	11428	+
chr1	43362235	43362236	ENSG00000117399.14:ENST00000310955.11:chr1:43362235:+	41428	+
chr1	43362237	43362238	ENSG00000117399.14:ENST00000310955.11:chr1:43362237:+	11428	+
chr1	43362241	43362242	ENSG00000117399.14:ENST00000310955.11:chr1:43362241:+	11428	+
chr1	43362247	43362248	ENSG00000117399.14:ENST00000310955.11:chr1:43362247:+	11428	+
chr1	43362259	43362260	ENSG00000117399.14:ENST00000310955.11:chr1:43362259:+	11427	+
chr1	43362280	43362281	ENSG00000117399.14:ENST00000310955.11:chr1:43362280:+	11427	+
chr1	43362952	43362953	ENSG00000117399.14:ENST00000310955.11:chr1:43362952:+	31428	+
chr1	43362954	43362955	ENSG00000117399.14:ENST00000310955.11:chr1:43362954:+	21428	+
chr1	43362960	43362961	ENSG00000117399.14:ENST00000310955.11:chr1:43362960:+	11428	+
chr1	43362985	43362986	ENSG00000117399.14:ENST00000310955.11:chr1:43362985:+	11428	+
chr1	43363025	43363026	ENSG00000117399.14:ENST00000310955.11:chr1:43363025:+	21427	+
chr1	43363039	43363040	ENSG00000117399.14:ENST00000310955.11:chr1:43363039:+	11428	+
chr1	43363056	43363057	ENSG00000117399.14:ENST00000310955.11:chr1:43363056:+	11428	+
chr1	43363066	43363067	ENSG00000117399.14:ENST00000310955.11:chr1:43363066:+	11428	+
chr1	43363069	43363070	ENSG00000117399.14:ENST00000310955.11:chr1:43363069:+	11428	+
chr1	43363094	43363095	ENSG00000117399.14:ENST00000310955.11:chr1:43363094:+	11427	+
chr1	43363122	43363123	ENSG00000117399.14:ENST00000310955.11:chr1:43363122:+	41428	+
chr1	52059880	52059881	ENSG00000134717.18:ENST00000313334.13:chr1:52059880:+	1,58	+
chr1	52083344	52083345	ENSG00000134717.18:ENST00000313334.13:chr1:52083344:+	2,58	+
chr1	52083452	52083453	ENSG00000134717.18:ENST00000313334.13:chr1:52083452:+	1,58	+
chr1	52083454	52083455	ENSG00000134717.18:ENST00000313334.13:chr1:52083454:+	1,58	+
chr1	52083502	52083503	ENSG00000134717.18:ENST00000313334.13:chr1:52083502:+	1,58	+
chr1	145608167	145608168	ENSG00000117262.19:ENST00000313835.14:chr1:145608167:+	1,85	+
chr1	145616262	145616263	ENSG00000117262.19:ENST00000313835.14:chr1:145616262:+	2,85	+
chr1	145616265	145616266	ENSG00000117262.19:ENST00000313835.14:chr1:145616265:+	1,85	+
chr1	145623068	145623069	ENSG00000117262.19:ENST00000313835.14:chr1:145623068:+	2,85	+
chr1	145623110	145623111	ENSG00000117262.19:ENST00000313835.14:chr1:145623110:+	2,85	+
chr1	145623620	145623621	ENSG00000117262.19:ENST00000313835.14:chr1:145623620:+	1,85	+
chr1	145623700	145623701	ENSG00000117262.19:ENST00000313835.14:chr1:145623700:+	1,85	+
chr1	145630737	145630738	ENSG00000117262.19:ENST00000313835.14:chr1:145630737:+	2,85	+
chr1	145630741	145630742	ENSG00000117262.19:ENST00000313835.14:chr1:145630741:+	1,85	+
chr1	145630789	145630790	ENSG00000117262.19:ENST00000313835.14:chr1:145630789:+	1,85	+
chr1	145631671	145631672	ENSG00000117262.19:ENST00000313835.14:chr1:145631671:+	1,85	+
chr1	145631697	145631698	ENSG00000117262.19:ENST00000313835.14:chr1:145631697:+	1,85	+
chr1	145643920	145643921	ENSG00000117262.19:ENST00000313835.14:chr1:145643920:+	1,85	+
chr1	145643924	145643925	ENSG00000117262.19:ENST00000313835.14:chr1:145643924:+	1,85	+
chr1	145646189	145646190	ENSG00000117262.19:ENST00000313835.14:chr1:145646189:+	2,85	+
chr1	145646242	145646243	ENSG00000117262.19:ENST00000313835.14:chr1:145646242:+	2,85	+
chr1	145647245	145647246	ENSG00000117262.19:ENST00000313835.14:chr1:145647245:+	1,85	+
chr1	145663406	145663407	ENSG00000117262.19:ENST00000313835.14:chr1:145663406:+	1,85	+
chr1	145665581	145665582	ENSG00000117262.19:ENST00000313835.14:chr1:145665581:+	1,85	+
chr1	145665640	145665641	ENSG00000117262.19:ENST00000313835.14:chr1:145665640:+	1,85	+
chr1	145665646	145665647	ENSG00000117262.19:ENST00000313835.14:chr1:145665646:+	2,85	+
chr1	145669662	145669663	ENSG00000117262.19:ENST00000313835.14:chr1:145669662:+	3,85	+
chr1	145669931	145669932	ENSG00000117262.19:ENST00000313835.14:chr1:145669931:+	1,85	+
chr1	145669994	145669995	ENSG00000117262.19:ENST00000313835.14:chr1:145669994:+	1,85	+
chr1	147936679	147936680	ENSG00000188092.15:ENST00000314163.12:chr1:147936679:+	1,10	+
chr1	147969892	147969893	ENSG00000188092.15:ENST00000314163.12:chr1:147969892:+	1,10	+
chr1	147992800	147992801	ENSG00000188092.15:ENST00000314163.12:chr1:147992800:+	1,10	+
chr1	154988188	154988189	ENSG00000160688.19:ENST00000315144.14:chr1:154988188:+	1,77	+
chr1	154988441	154988442	ENSG00000160688.19:ENST00000315144.14:chr1:154988441:+	2,78	+
chr1	154988449	154988450	ENSG00000160688.19:ENST00000315144.14:chr1:154988449:+	1,78	+
chr1	154988503	154988504	ENSG00000160688.19:ENST00000315144.14:chr1:154988503:+	1,78	+
chr1	154988571	154988572	ENSG00000160688.19:ENST00000315144.14:chr1:154988571:+	1,78	+
chr1	154988573	154988574	ENSG00000160688.19:ENST00000315144.14:chr1:154988573:+	1,78	+
chr1	154988754	154988755	ENSG00000160688.19:ENST00000315144.14:chr1:154988754:+	1,78	+
chr1	154988793	154988794	ENSG00000160688.19:ENST00000315144.14:chr1:154988793:+	1,78	+
chr1	154988832	154988833	ENSG00000160688.19:ENST00000315144.14:chr1:154988832:+	1,78	+
chr1	154988836	154988837	ENSG00000160688.19:ENST00000315144.14:chr1:154988836:+	1,78	+
chr1	154989689	154989690	ENSG00000160688.19:ENST00000315144.14:chr1:154989689:+	1,78	+
chr1	154990240	154990241	ENSG00000160688.19:ENST00000315144.14:chr1:154990240:+	1,78	+
chr1	154993024	154993025	ENSG00000160688.19:ENST00000315144.14:chr1:154993024:+	1,78	+
chr1	167951840	167951841	ENSG00000143164.15:ENST00000312263.10:chr1:167951840:+	1,29	+
chr1	167966639	167966640	ENSG00000143164.15:ENST00000312263.10:chr1:167966639:+	1,29	+
chr1	167966651	167966652	ENSG00000143164.15:ENST00000312263.10:chr1:167966651:+	1,29	+
chr1	167966711	167966712	ENSG00000143164.15:ENST00000312263.10:chr1:167966711:+	1,29	+
chr1	167975004	167975005	ENSG00000143164.15:ENST00000312263.10:chr1:167975004:+	1,29	+
chr1	167991268	167991269	ENSG00000143164.15:ENST00000312263.10:chr1:167991268:+	1,29	+
chr1	168043129	168043130	ENSG00000143164.15:ENST00000312263.10:chr1:168043129:+	1,31	+
chr1	168045021	168045022	ENSG00000143164.15:ENST00000312263.10:chr1:168045021:+	1,31	+
chr1	168045167	168045168	ENSG00000143164.15:ENST00000312263.10:chr1:168045167:+	2,31	+
chr1	168063621	168063622	ENSG00000143164.15:ENST00000312263.10:chr1:168063621:+	1,31	+
chr1	168065717	168065718	ENSG00000143164.15:ENST00000312263.10:chr1:168065717:+	1,27	+
chr1	235504195	235504196	ENSG00000162885.14:ENST00000313984.3:chr1:235504195:-	1,1	-
chr2	38750060	38750061	ENSG00000115875.19:ENST00000313117.11:chr2:38750060:-	1346	-
chr2	38750106	38750107	ENSG00000115875.19:ENST00000313117.11:chr2:38750106:-	1346	-
chr2	38750163	38750164	ENSG00000115875.19:ENST00000313117.11:chr2:38750163:-	2344	-
chr2	38749548	38749549	ENSG00000115875.19:ENST00000313117.11:chr2:38749548:-	4347	-
chr2	38749553	38749554	ENSG00000115875.19:ENST00000313117.11:chr2:38749553:-	1347	-
chr2	38749556	38749557	ENSG00000115875.19:ENST00000313117.11:chr2:38749556:-	1347	-
chr2	38749574	38749575	ENSG00000115875.19:ENST00000313117.11:chr2:38749574:-	1347	-
chr2	38749619	38749620	ENSG00000115875.19:ENST00000313117.11:chr2:38749619:-	1347	-
chr2	38749646	38749647	ENSG00000115875.19:ENST00000313117.11:chr2:38749646:-	1347	-
chr2	38748610	38748611	ENSG00000115875.19:ENST00000313117.11:chr2:38748610:-	1347	-
chr2	38748626	38748627	ENSG00000115875.19:ENST00000313117.11:chr2:38748626:-	1347	-
chr2	38748636	38748637	ENSG00000115875.19:ENST00000313117.11:chr2:38748636:-	1347	-
chr2	38748076	38748077	ENSG00000115875.19:ENST00000313117.11:chr2:38748076:-	1347	-
chr2	38748082	38748083	ENSG00000115875.19:ENST00000313117.11:chr2:38748082:-	1347	-
chr2	38748092	38748093	ENSG00000115875.19:ENST00000313117.11:chr2:38748092:-	6347	-
chr2	38748116	38748117	ENSG00000115875.19:ENST00000313117.11:chr2:38748116:-	2347	-
chr2	38746702	38746703	ENSG00000115875.19:ENST00000313117.11:chr2:38746702:-	1347	-
chr2	38746706	38746707	ENSG00000115875.19:ENST00000313117.11:chr2:38746706:-	2347	-
chr2	38746726	38746727	ENSG00000115875.19:ENST00000313117.11:chr2:38746726:-	1347	-
chr2	38746732	38746733	ENSG00000115875.19:ENST00000313117.11:chr2:38746732:-	1347	-
chr2	38746155	38746156	ENSG00000115875.19:ENST00000313117.11:chr2:38746155:-	1347	-
chr2	38746173	38746174	ENSG00000115875.19:ENST00000313117.11:chr2:38746173:-	1347	-
chr2	38745185	38745186	ENSG00000115875.19:ENST00000313117.11:chr2:38745185:-	1347	-
chr2	241264456	241264457	ENSG00000115677.18:ENST00000310931.10:chr2:241264456:-	1,38	-
chr2	241264576	241264577	ENSG00000115677.18:ENST00000310931.10:chr2:241264576:-	1,38	-
chr2	241256660	241256661	ENSG00000115677.18:ENST00000310931.10:chr2:241256660:-	1,38	-
chr2	241256683	241256684	ENSG00000115677.18:ENST00000310931.10:chr2:241256683:-	1,38	-
chr2	241256396	241256397	ENSG00000115677.18:ENST00000310931.10:chr2:241256396:-	1,38	-
chr2	241255534	241255535	ENSG00000115677.18:ENST00000310931.10:chr2:241255534:-	1,27	-
chr2	241253488	241253489	ENSG00000115677.18:ENST00000310931.10:chr2:241253488:-	1,27	-
chr2	241248058	241248059	ENSG00000115677.18:ENST00000310931.10:chr2:241248058:-	1,27	-
chr2	241246796	241246797	ENSG00000115677.18:ENST00000310931.10:chr2:241246796:-	1,27	-
chr2	241246856	241246857	ENSG00000115677.18:ENST00000310931.10:chr2:241246856:-	1,27	-
chr2	241239967	241239968	ENSG00000115677.18:ENST00000310931.10:chr2:241239967:-	1,27	-
chr2	241239987	241239988	ENSG00000115677.18:ENST00000310931.10:chr2:241239987:-	1,27	-
chr2	241240105	241240106	ENSG00000115677.18:ENST00000310931.10:chr2:241240105:-	1,27	-
chr2	241239802	241239803	ENSG00000115677.18:ENST00000310931.10:chr2:241239802:-	1,27	-
chr2	241236759	241236760	ENSG00000115677.18:ENST00000310931.10:chr2:241236759:-	1,27	-
chr2	241230815	241230816	ENSG00000115677.18:ENST00000310931.10:chr2:241230815:-	1,27	-
chr2	241230179	241230180	ENSG00000115677.18:ENST00000310931.10:chr2:241230179:-	1,27	-
chr2	241230227	241230228	ENSG00000115677.18:ENST00000310931.10:chr2:241230227:-	1,27	-
chr2	241230233	241230234	ENSG00000115677.18:ENST00000310931.10:chr2:241230233:-	1,27	-
chr2	241229656	241229657	ENSG00000115677.18:ENST00000310931.10:chr2:241229656:-	1,27	-
chr3	38252360	38252361	ENSG00000172939.9:ENST00000311806.8:chr3:38252360:+	1,19	+
chr3	121828601	121828602	ENSG00000173226.17:ENST00000310864.11:chr3:121828601:-	1,7	-
chr3	121808987	121808988	ENSG00000173226.17:ENST00000310864.11:chr3:121808987:-	1,7	-
chr4	1723435	1723436	ENSG00000013810.21:ENST00000313288.9:chr4:1723435:+	1377	+
chr4	1723441	1723442	ENSG00000013810.21:ENST00000313288.9:chr4:1723441:+	2377	+
chr4	1723494	1723495	ENSG00000013810.21:ENST00000313288.9:chr4:1723494:+	1377	+
chr4	1723496	1723497	ENSG00000013810.21:ENST00000313288.9:chr4:1723496:+	1377	+
chr4	1723499	1723500	ENSG00000013810.21:ENST00000313288.9:chr4:1723499:+	1377	+
chr4	1723521	1723522	ENSG00000013810.21:ENST00000313288.9:chr4:1723521:+	1377	+
chr4	1723740	1723741	ENSG00000013810.21:ENST00000313288.9:chr4:1723740:+	1377	+
chr4	1723754	1723755	ENSG00000013810.21:ENST00000313288.9:chr4:1723754:+	1377	+
chr4	1723757	1723758	ENSG00000013810.21:ENST00000313288.9:chr4:1723757:+	1377	+
chr4	1723772	1723773	ENSG00000013810.21:ENST00000313288.9:chr4:1723772:+	1377	+
chr4	1723796	1723797	ENSG00000013810.21:ENST00000313288.9:chr4:1723796:+	1377	+
chr4	1723805	1723806	ENSG00000013810.21:ENST00000313288.9:chr4:1723805:+	1377	+
chr4	1723810	1723811	ENSG00000013810.21:ENST00000313288.9:chr4:1723810:+	1377	+
chr4	1723812	1723813	ENSG00000013810.21:ENST00000313288.9:chr4:1723812:+	1377	+
chr4	1723822	1723823	ENSG00000013810.21:ENST00000313288.9:chr4:1723822:+	3377	+
chr4	1727708	1727709	ENSG00000013810.21:ENST00000313288.9:chr4:1727708:+	1377	+
chr4	1727711	1727712	ENSG00000013810.21:ENST00000313288.9:chr4:1727711:+	1377	+
chr4	1727739	1727740	ENSG00000013810.21:ENST00000313288.9:chr4:1727739:+	2377	+
chr4	1727753	1727754	ENSG00000013810.21:ENST00000313288.9:chr4:1727753:+	1377	+
chr4	1727762	1727763	ENSG00000013810.21:ENST00000313288.9:chr4:1727762:+	1377	+
chr4	1727854	1727855	ENSG00000013810.21:ENST00000313288.9:chr4:1727854:+	1377	+
chr4	1727964	1727965	ENSG00000013810.21:ENST00000313288.9:chr4:1727964:+	1377	+
chr4	1727970	1727971	ENSG00000013810.21:ENST00000313288.9:chr4:1727970:+	1377	+
chr4	1727971	1727972	ENSG00000013810.21:ENST00000313288.9:chr4:1727971:+	1377	+
chr4	1727977	1727978	ENSG00000013810.21:ENST00000313288.9:chr4:1727977:+	2377	+
chr4	1727994	1727995	ENSG00000013810.21:ENST00000313288.9:chr4:1727994:+	1377	+
chr4	1728003	1728004	ENSG00000013810.21:ENST00000313288.9:chr4:1728003:+	1376	+
chr4	1728019	1728020	ENSG00000013810.21:ENST00000313288.9:chr4:1728019:+	1377	+
chr4	1728024	1728025	ENSG00000013810.21:ENST00000313288.9:chr4:1728024:+	1377	+
chr4	1728084	1728085	ENSG00000013810.21:ENST00000313288.9:chr4:1728084:+	1377	+
chr4	1728138	1728139	ENSG00000013810.21:ENST00000313288.9:chr4:1728138:+	1378	+
chr4	1728145	1728146	ENSG00000013810.21:ENST00000313288.9:chr4:1728145:+	1378	+
chr4	1728147	1728148	ENSG00000013810.21:ENST00000313288.9:chr4:1728147:+	1378	+
chr4	1728218	1728219	ENSG00000013810.21:ENST00000313288.9:chr4:1728218:+	1378	+
chr4	1728246	1728247	ENSG00000013810.21:ENST00000313288.9:chr4:1728246:+	1380	+
chr4	1728276	1728277	ENSG00000013810.21:ENST00000313288.9:chr4:1728276:+	1379	+
chr4	1728284	1728285	ENSG00000013810.21:ENST00000313288.9:chr4:1728284:+	1380	+
chr4	1728315	1728316	ENSG00000013810.21:ENST00000313288.9:chr4:1728315:+	1380	+
chr4	1728347	1728348	ENSG00000013810.21:ENST00000313288.9:chr4:1728347:+	1380	+
chr4	1728455	1728456	ENSG00000013810.21:ENST00000313288.9:chr4:1728455:+	1377	+
chr4	1728499	1728500	ENSG00000013810.21:ENST00000313288.9:chr4:1728499:+	1380	+
chr4	1728553	1728554	ENSG00000013810.21:ENST00000313288.9:chr4:1728553:+	1380	+
chr4	1728565	1728566	ENSG00000013810.21:ENST00000313288.9:chr4:1728565:+	1380	+
chr4	1728580	1728581	ENSG00000013810.21:ENST00000313288.9:chr4:1728580:+	1379	+
chr4	1728606	1728607	ENSG00000013810.21:ENST00000313288.9:chr4:1728606:+	1380	+
chr4	1728610	1728611	ENSG00000013810.21:ENST00000313288.9:chr4:1728610:+	1380	+
chr4	1728619	1728620	ENSG00000013810.21:ENST00000313288.9:chr4:1728619:+	2380	+
chr4	1728637	1728638	ENSG00000013810.21:ENST00000313288.9:chr4:1728637:+	1380	+
chr4	1728643	1728644	ENSG00000013810.21:ENST00000313288.9:chr4:1728643:+	2380	+
chr4	1728655	1728656	ENSG00000013810.21:ENST00000313288.9:chr4:1728655:+	1380	+
chr4	1728729	1728730	ENSG00000013810.21:ENST00000313288.9:chr4:1728729:+	1380	+
chr4	1728759	1728760	ENSG00000013810.21:ENST00000313288.9:chr4:1728759:+	1380	+
chr4	1730933	1730934	ENSG00000013810.21:ENST00000313288.9:chr4:1730933:+	1380	+
chr4	1731178	1731179	ENSG00000013810.21:ENST00000313288.9:chr4:1731178:+	1379	+
chr4	1731190	1731191	ENSG00000013810.21:ENST00000313288.9:chr4:1731190:+	1380	+
chr4	1731196	1731197	ENSG00000013810.21:ENST00000313288.9:chr4:1731196:+	1380	+
chr4	1731204	1731205	ENSG00000013810.21:ENST00000313288.9:chr4:1731204:+	1379	+
chr4	1731240	1731241	ENSG00000013810.21:ENST00000313288.9:chr4:1731240:+	2380	+
chr4	1731290	1731291	ENSG00000013810.21:ENST00000313288.9:chr4:1731290:+	1380	+
chr4	1735281	1735282	ENSG00000013810.21:ENST00000313288.9:chr4:1735281:+	2380	+
chr4	1735300	1735301	ENSG00000013810.21:ENST00000313288.9:chr4:1735300:+	1380	+
chr4	1735320	1735321	ENSG00000013810.21:ENST00000313288.9:chr4:1735320:+	1380	+
chr4	1735777	1735778	ENSG00000013810.21:ENST00000313288.9:chr4:1735777:+	2379	+
chr4	1735796	1735797	ENSG00000013810.21:ENST00000313288.9:chr4:1735796:+	1381	+
chr4	1737321	1737322	ENSG00000013810.21:ENST00000313288.9:chr4:1737321:+	2381	+
chr4	1737325	1737326	ENSG00000013810.21:ENST00000313288.9:chr4:1737325:+	1381	+
chr4	1737600	1737601	ENSG00000013810.21:ENST00000313288.9:chr4:1737600:+	1381	+
chr4	1737611	1737612	ENSG00000013810.21:ENST00000313288.9:chr4:1737611:+	1381	+
chr4	1737621	1737622	ENSG00000013810.21:ENST00000313288.9:chr4:1737621:+	1380	+
chr4	1739711	1739712	ENSG00000013810.21:ENST00000313288.9:chr4:1739711:+	1381	+
chr4	1739970	1739971	ENSG00000013810.21:ENST00000313288.9:chr4:1739970:+	1381	+
chr4	1739991	1739992	ENSG00000013810.21:ENST00000313288.9:chr4:1739991:+	1381	+
chr4	1740875	1740876	ENSG00000013810.21:ENST00000313288.9:chr4:1740875:+	1381	+
chr4	1740889	1740890	ENSG00000013810.21:ENST00000313288.9:chr4:1740889:+	1380	+
chr4	1740893	1740894	ENSG00000013810.21:ENST00000313288.9:chr4:1740893:+	1380	+
chr4	1740910	1740911	ENSG00000013810.21:ENST00000313288.9:chr4:1740910:+	2380	+
chr4	1740924	1740925	ENSG00000013810.21:ENST00000313288.9:chr4:1740924:+	1380	+
chr4	1740934	1740935	ENSG00000013810.21:ENST00000313288.9:chr4:1740934:+	1380	+
chr4	1744527	1744528	ENSG00000013810.21:ENST00000313288.9:chr4:1744527:+	1380	+
chr4	1744564	1744565	ENSG00000013810.21:ENST00000313288.9:chr4:1744564:+	2380	+
chr4	1744796	1744797	ENSG00000013810.21:ENST00000313288.9:chr4:1744796:+	1380	+
chr4	2497045	2497046	ENSG00000063978.16:ENST00000314289.13:chr4:2497045:+	1,88	+
chr4	2512480	2512481	ENSG00000063978.16:ENST00000314289.13:chr4:2512480:+	1,88	+
chr4	2512531	2512532	ENSG00000063978.16:ENST00000314289.13:chr4:2512531:+	1,88	+
chr4	2513791	2513792	ENSG00000063978.16:ENST00000314289.13:chr4:2513791:+	1,88	+
chr4	39514177	39514178	ENSG00000109814.12:ENST00000316423.11:chr4:39514177:-	1,12	-
chr4	39505320	39505321	ENSG00000109814.12:ENST00000316423.11:chr4:39505320:-	1,13	-
chr4	39504425	39504426	ENSG00000109814.12:ENST00000316423.11:chr4:39504425:-	1,13	-
chr4	83269905	83269906	ENSG00000173085.15:ENST00000311469.9:chr4:83269905:-	1,4	-
chr4	83269966	83269967	ENSG00000173085.15:ENST00000311469.9:chr4:83269966:-	1,4	-
chr4	83264232	83264233	ENSG00000173085.15:ENST00000311469.9:chr4:83264232:-	1,4	-
chr5	77036681	77036682	ENSG00000164252.13:ENST00000312916.12:chr5:77036681:+	1,12	+
chr5	77046453	77046454	ENSG00000164252.13:ENST00000312916.12:chr5:77046453:+	1,10	+
chr5	77048959	77048960	ENSG00000164252.13:ENST00000312916.12:chr5:77048959:+	1,10	+
chr5	100535701	100535702	ENSG00000174132.9:ENST00000312637.5:chr5:100535701:+	1,25	+
chr5	100562068	100562069	ENSG00000174132.9:ENST00000312637.5:chr5:100562068:+	1,26	+
chr5	100562076	100562077	ENSG00000174132.9:ENST00000312637.5:chr5:100562076:+	1,26	+
chr5	150447614	150447615	ENSG00000164587.13:ENST00000312037.6:chr5:150447614:-	1,82	-
chr5	150447629	150447630	ENSG00000164587.13:ENST00000312037.6:chr5:150447629:-	1,82	-
chr5	150447677	150447678	ENSG00000164587.13:ENST00000312037.6:chr5:150447677:-	1,82	-
chr5	150446827	150446828	ENSG00000164587.13:ENST00000312037.6:chr5:150446827:-	1,82	-
chr5	150446882	150446883	ENSG00000164587.13:ENST00000312037.6:chr5:150446882:-	1,82	-
chr5	150446956	150446957	ENSG00000164587.13:ENST00000312037.6:chr5:150446956:-	1,82	-
chr5	151751738	151751739	ENSG00000177556.12:ENST00000313115.11:chr5:151751738:-	1141	-
chr5	151751753	151751754	ENSG00000177556.12:ENST00000313115.11:chr5:151751753:-	1141	-
chr5	151751758	151751759	ENSG00000177556.12:ENST00000313115.11:chr5:151751758:-	1141	-
chr5	151751765	151751766	ENSG00000177556.12:ENST00000313115.11:chr5:151751765:-	1141	-
chr5	151746339	151746340	ENSG00000177556.12:ENST00000313115.11:chr5:151746339:-	1141	-
chr5	151746358	151746359	ENSG00000177556.12:ENST00000313115.11:chr5:151746358:-	2141	-
chr5	151746370	151746371	ENSG00000177556.12:ENST00000313115.11:chr5:151746370:-	2141	-
chr5	151746380	151746381	ENSG00000177556.12:ENST00000313115.11:chr5:151746380:-	1141	-
chr5	151746393	151746394	ENSG00000177556.12:ENST00000313115.11:chr5:151746393:-	2141	-
chr5	151746395	151746396	ENSG00000177556.12:ENST00000313115.11:chr5:151746395:-	1141	-
chr5	151746435	151746436	ENSG00000177556.12:ENST00000313115.11:chr5:151746435:-	3141	-
chr5	173616211	173616212	ENSG00000145919.11:ENST00000311086.9:chr5:173616211:-	3505	-
chr5	173616223	173616224	ENSG00000145919.11:ENST00000311086.9:chr5:173616223:-	1505	-
chr5	173616235	173616236	ENSG00000145919.11:ENST00000311086.9:chr5:173616235:-	1505	-
chr5	173616259	173616260	ENSG00000145919.11:ENST00000311086.9:chr5:173616259:-	1503	-
chr5	173616283	173616284	ENSG00000145919.11:ENST00000311086.9:chr5:173616283:-	2503	-
chr5	173616295	173616296	ENSG00000145919.11:ENST00000311086.9:chr5:173616295:-	1503	-
chr5	173616300	173616301	ENSG00000145919.11:ENST00000311086.9:chr5:173616300:-	1503	-
chr5	173616306	173616307	ENSG00000145919.11:ENST00000311086.9:chr5:173616306:-	1503	-
chr5	173616319	173616320	ENSG00000145919.11:ENST00000311086.9:chr5:173616319:-	1503	-
chr5	173616347	173616348	ENSG00000145919.11:ENST00000311086.9:chr5:173616347:-	2501	-
chr5	173616350	173616351	ENSG00000145919.11:ENST00000311086.9:chr5:173616350:-	1501	-
chr5	173616359	173616360	ENSG00000145919.11:ENST00000311086.9:chr5:173616359:-	1500	-
chr5	173616368	173616369	ENSG00000145919.11:ENST00000311086.9:chr5:173616368:-	1500	-
chr5	173616371	173616372	ENSG00000145919.11:ENST00000311086.9:chr5:173616371:-	1500	-
chr5	173616388	173616389	ENSG00000145919.11:ENST00000311086.9:chr5:173616388:-	1499	-
chr5	173616401	173616402	ENSG00000145919.11:ENST00000311086.9:chr5:173616401:-	3499	-
chr5	173616427	173616428	ENSG00000145919.11:ENST00000311086.9:chr5:173616427:-	2499	-
chr5	173613149	173613150	ENSG00000145919.11:ENST00000311086.9:chr5:173613149:-	1505	-
chr5	173613198	173613199	ENSG00000145919.11:ENST00000311086.9:chr5:173613198:-	2505	-
chr5	173613206	173613207	ENSG00000145919.11:ENST00000311086.9:chr5:173613206:-	1505	-
chr5	173613208	173613209	ENSG00000145919.11:ENST00000311086.9:chr5:173613208:-	1505	-
chr5	173609245	173609246	ENSG00000145919.11:ENST00000311086.9:chr5:173609245:-	1507	-
chr5	173609247	173609248	ENSG00000145919.11:ENST00000311086.9:chr5:173609247:-	1507	-
chr5	173609282	173609283	ENSG00000145919.11:ENST00000311086.9:chr5:173609282:-	1507	-
chr5	173609287	173609288	ENSG00000145919.11:ENST00000311086.9:chr5:173609287:-	1507	-
chr5	173609288	173609289	ENSG00000145919.11:ENST00000311086.9:chr5:173609288:-	1507	-
chr5	173609345	173609346	ENSG00000145919.11:ENST00000311086.9:chr5:173609345:-	1507	-
chr5	173609361	173609362	ENSG00000145919.11:ENST00000311086.9:chr5:173609361:-	1507	-
chr5	173609370	173609371	ENSG00000145919.11:ENST00000311086.9:chr5:173609370:-	1506	-
chr5	173609375	173609376	ENSG00000145919.11:ENST00000311086.9:chr5:173609375:-	1506	-
chr7	24872005	24872006	ENSG00000070882.13:ENST00000313367.7:chr7:24872005:-	1,19	-
chr7	24870743	24870744	ENSG00000070882.13:ENST00000313367.7:chr7:24870743:-	1,19	-
chr7	24840768	24840769	ENSG00000070882.13:ENST00000313367.7:chr7:24840768:-	1,19	-
chr7	24806817	24806818	ENSG00000070882.13:ENST00000313367.7:chr7:24806817:-	1,20	-
chr7	24800200	24800201	ENSG00000070882.13:ENST00000313367.7:chr7:24800200:-	1,20	-
chr8	38169895	38169896	ENSG00000175324.10:ENST00000311351.9:chr8:38169895:-	1,58	-
chr8	38163707	38163708	ENSG00000175324.10:ENST00000311351.9:chr8:38163707:-	1,58	-
chr8	47785268	47785269	ENSG00000253729.8:ENST00000314191.7:chr8:47785268:-	1,6	-
chr8	47782593	47782594	ENSG00000253729.8:ENST00000314191.7:chr8:47782593:-	1,7	-
chr9	120874570	120874571	ENSG00000119403.15:ENST00000312189.10:chr9:120874570:-	1132	-
chr9	120874573	120874574	ENSG00000119403.15:ENST00000312189.10:chr9:120874573:-	1132	-
chr9	120874576	120874577	ENSG00000119403.15:ENST00000312189.10:chr9:120874576:-	2132	-
chr9	120874619	120874620	ENSG00000119403.15:ENST00000312189.10:chr9:120874619:-	1132	-
chr9	120874623	120874624	ENSG00000119403.15:ENST00000312189.10:chr9:120874623:-	1131	-
chr9	120874636	120874637	ENSG00000119403.15:ENST00000312189.10:chr9:120874636:-	1131	-
chr9	120874645	120874646	ENSG00000119403.15:ENST00000312189.10:chr9:120874645:-	3131	-
chr9	120874648	120874649	ENSG00000119403.15:ENST00000312189.10:chr9:120874648:-	2131	-
chr9	120874719	120874720	ENSG00000119403.15:ENST00000312189.10:chr9:120874719:-	1131	-
chr9	120874028	120874029	ENSG00000119403.15:ENST00000312189.10:chr9:120874028:-	1134	-
chr9	120870506	120870507	ENSG00000119403.15:ENST00000312189.10:chr9:120870506:-	1134	-
chr9	120869707	120869708	ENSG00000119403.15:ENST00000312189.10:chr9:120869707:-	1135	-
chr9	120869780	120869781	ENSG00000119403.15:ENST00000312189.10:chr9:120869780:-	1135	-
chr9	120869787	120869788	ENSG00000119403.15:ENST00000312189.10:chr9:120869787:-	1135	-
chr9	120869800	120869801	ENSG00000119403.15:ENST00000312189.10:chr9:120869800:-	1135	-
chr9	120869859	120869860	ENSG00000119403.15:ENST00000312189.10:chr9:120869859:-	1135	-
chr9	120869870	120869871	ENSG00000119403.15:ENST00000312189.10:chr9:120869870:-	1135	-
chr9	120869885	120869886	ENSG00000119403.15:ENST00000312189.10:chr9:120869885:-	1135	-
chr9	120869887	120869888	ENSG00000119403.15:ENST00000312189.10:chr9:120869887:-	1135	-
chr9	120869889	120869890	ENSG00000119403.15:ENST00000312189.10:chr9:120869889:-	1135	-
chr9	120869937	120869938	ENSG00000119403.15:ENST00000312189.10:chr9:120869937:-	1135	-
chr10	100989227	100989228	ENSG00000107815.10:ENST00000311916.8:chr10:100989227:+	1,12	+
chr10	100989425	100989426	ENSG00000107815.10:ENST00000311916.8:chr10:100989425:+	1,12	+
chr10	100993457	100993458	ENSG00000107815.10:ENST00000311916.8:chr10:100993457:+	1,12	+
chr11	45810797	45810798	ENSG00000181830.9:ENST00000314134.4:chr11:45810797:+	1,36	+
chr11	65919524	65919525	ENSG00000175550.8:ENST00000312515.7:chr11:65919524:+	1272	+
chr11	65919536	65919537	ENSG00000175550.8:ENST00000312515.7:chr11:65919536:+	1270	+
chr11	65919541	65919542	ENSG00000175550.8:ENST00000312515.7:chr11:65919541:+	1272	+
chr11	65919808	65919809	ENSG00000175550.8:ENST00000312515.7:chr11:65919808:+	2272	+
chr11	65919834	65919835	ENSG00000175550.8:ENST00000312515.7:chr11:65919834:+	1273	+
chr11	65919844	65919845	ENSG00000175550.8:ENST00000312515.7:chr11:65919844:+	1273	+
chr11	65919974	65919975	ENSG00000175550.8:ENST00000312515.7:chr11:65919974:+	1273	+
chr11	65919989	65919990	ENSG00000175550.8:ENST00000312515.7:chr11:65919989:+	1273	+
chr11	65920007	65920008	ENSG00000175550.8:ENST00000312515.7:chr11:65920007:+	1273	+
chr11	65920022	65920023	ENSG00000175550.8:ENST00000312515.7:chr11:65920022:+	2273	+
chr11	65920346	65920347	ENSG00000175550.8:ENST00000312515.7:chr11:65920346:+	1273	+
chr11	65920364	65920365	ENSG00000175550.8:ENST00000312515.7:chr11:65920364:+	1273	+
chr11	65920378	65920379	ENSG00000175550.8:ENST00000312515.7:chr11:65920378:+	1273	+
chr11	65920412	65920413	ENSG00000175550.8:ENST00000312515.7:chr11:65920412:+	2273	+
chr11	65920435	65920436	ENSG00000175550.8:ENST00000312515.7:chr11:65920435:+	2273	+
chr11	65920447	65920448	ENSG00000175550.8:ENST00000312515.7:chr11:65920447:+	1276	+
chr11	65920615	65920616	ENSG00000175550.8:ENST00000312515.7:chr11:65920615:+	1276	+
chr11	65920628	65920629	ENSG00000175550.8:ENST00000312515.7:chr11:65920628:+	1276	+
chr11	65920645	65920646	ENSG00000175550.8:ENST00000312515.7:chr11:65920645:+	1276	+
chr11	65920899	65920900	ENSG00000175550.8:ENST00000312515.7:chr11:65920899:+	1276	+
chr11	65920905	65920906	ENSG00000175550.8:ENST00000312515.7:chr11:65920905:+	2276	+
chr11	65920963	65920964	ENSG00000175550.8:ENST00000312515.7:chr11:65920963:+	4276	+
chr11	65921344	65921345	ENSG00000175550.8:ENST00000312515.7:chr11:65921344:+	1276	+
chr11	65921358	65921359	ENSG00000175550.8:ENST00000312515.7:chr11:65921358:+	4276	+
chr11	65921367	65921368	ENSG00000175550.8:ENST00000312515.7:chr11:65921367:+	1276	+
chr11	65921375	65921376	ENSG00000175550.8:ENST00000312515.7:chr11:65921375:+	1276	+
chr11	65921394	65921395	ENSG00000175550.8:ENST00000312515.7:chr11:65921394:+	3276	+
chr11	65921430	65921431	ENSG00000175550.8:ENST00000312515.7:chr11:65921430:+	1276	+
chr11	66336367	66336368	ENSG00000174791.11:ENST00000311320.9:chr11:66336367:-	1,63	-
chr11	66336023	66336024	ENSG00000174791.11:ENST00000311320.9:chr11:66336023:-	1,65	-
chr11	66335780	66335781	ENSG00000174791.11:ENST00000311320.9:chr11:66335780:-	1,66	-
chr11	66335852	66335853	ENSG00000174791.11:ENST00000311320.9:chr11:66335852:-	1,65	-
chr11	66335440	66335441	ENSG00000174791.11:ENST00000311320.9:chr11:66335440:-	1,67	-
chr11	66335455	66335456	ENSG00000174791.11:ENST00000311320.9:chr11:66335455:-	1,67	-
chr11	66334720	66334721	ENSG00000174791.11:ENST00000311320.9:chr11:66334720:-	1,67	-
chr11	66334726	66334727	ENSG00000174791.11:ENST00000311320.9:chr11:66334726:-	1,67	-
chr11	66334965	66334966	ENSG00000174791.11:ENST00000311320.9:chr11:66334965:-	1,67	-
chr11	66335023	66335024	ENSG00000174791.11:ENST00000311320.9:chr11:66335023:-	1,67	-
chr11	66333625	66333626	ENSG00000174791.11:ENST00000311320.9:chr11:66333625:-	1,67	-
chr11	66333632	66333633	ENSG00000174791.11:ENST00000311320.9:chr11:66333632:-	1,67	-
chr11	66333398	66333399	ENSG00000174791.11:ENST00000311320.9:chr11:66333398:-	1,67	-
chr11	66332285	66332286	ENSG00000174791.11:ENST00000311320.9:chr11:66332285:-	1,67	-
chr11	66332310	66332311	ENSG00000174791.11:ENST00000311320.9:chr11:66332310:-	1,67	-
chr11	66332543	66332544	ENSG00000174791.11:ENST00000311320.9:chr11:66332543:-	1,67	-
chr11	66438639	66438640	ENSG00000174547.13:ENST00000310999.11:chr11:66438639:-	1,88	-
chr11	66438749	66438750	ENSG00000174547.13:ENST00000310999.11:chr11:66438749:-	2,88	-
chr11	66438205	66438206	ENSG00000174547.13:ENST00000310999.11:chr11:66438205:-	1,88	-
chr11	66438212	66438213	ENSG00000174547.13:ENST00000310999.11:chr11:66438212:-	1,88	-
chr11	66437391	66437392	ENSG00000174547.13:ENST00000310999.11:chr11:66437391:-	1,88	-
chr11	66437437	66437438	ENSG00000174547.13:ENST00000310999.11:chr11:66437437:-	1,88	-
chr11	66437207	66437208	ENSG00000174547.13:ENST00000310999.11:chr11:66437207:-	1,88	-
chr11	66436063	66436064	ENSG00000174547.13:ENST00000310999.11:chr11:66436063:-	1,88	-
chr11	66436103	66436104	ENSG00000174547.13:ENST00000310999.11:chr11:66436103:-	1,88	-
chr11	66436108	66436109	ENSG00000174547.13:ENST00000310999.11:chr11:66436108:-	1,88	-
chr11	67353370	67353371	ENSG00000175482.9:ENST00000312419.8:chr11:67353370:-	1,36	-
chr11	67352697	67352698	ENSG00000175482.9:ENST00000312419.8:chr11:67352697:-	1,36	-
chr11	67352716	67352717	ENSG00000175482.9:ENST00000312419.8:chr11:67352716:-	1,36	-
chr11	67352797	67352798	ENSG00000175482.9:ENST00000312419.8:chr11:67352797:-	2,36	-
chr11	111754555	111754556	ENSG00000137713.16:ENST00000311129.9:chr11:111754555:-	1,6	-
chr11	111747963	111747964	ENSG00000137713.16:ENST00000311129.9:chr11:111747963:-	1,6	-
chr12	25225692	25225693	ENSG00000133703.13:ENST00000311936.8:chr12:25225692:-	1,10	-
chr12	50006495	50006496	ENSG00000161800.13:ENST00000312377.10:chr12:50006495:-	3,94	-
chr12	50005260	50005261	ENSG00000161800.13:ENST00000312377.10:chr12:50005260:-	1,94	-
chr12	50005293	50005294	ENSG00000161800.13:ENST00000312377.10:chr12:50005293:-	2,94	-
chr12	50005348	50005349	ENSG00000161800.13:ENST00000312377.10:chr12:50005348:-	1,94	-
chr12	50004258	50004259	ENSG00000161800.13:ENST00000312377.10:chr12:50004258:-	1,94	-
chr12	49999155	49999156	ENSG00000161800.13:ENST00000312377.10:chr12:49999155:-	2,94	-
chr12	49999251	49999252	ENSG00000161800.13:ENST00000312377.10:chr12:49999251:-	1,94	-
chr12	49999262	49999263	ENSG00000161800.13:ENST00000312377.10:chr12:49999262:-	1,94	-
chr12	49997058	49997059	ENSG00000161800.13:ENST00000312377.10:chr12:49997058:-	1,94	-
chr12	49994165	49994166	ENSG00000161800.13:ENST00000312377.10:chr12:49994165:-	1,94	-
chr12	49994197	49994198	ENSG00000161800.13:ENST00000312377.10:chr12:49994197:-	1,94	-
chr12	49992569	49992570	ENSG00000161800.13:ENST00000312377.10:chr12:49992569:-	1,94	-
chr12	49992275	49992276	ENSG00000161800.13:ENST00000312377.10:chr12:49992275:-	1,94	-
chr12	49992051	49992052	ENSG00000161800.13:ENST00000312377.10:chr12:49992051:-	1,94	-
chr12	49990689	49990690	ENSG00000161800.13:ENST00000312377.10:chr12:49990689:-	1,94	-
chr12	49990294	49990295	ENSG00000161800.13:ENST00000312377.10:chr12:49990294:-	2,94	-
chr12	49990316	49990317	ENSG00000161800.13:ENST00000312377.10:chr12:49990316:-	1,94	-
chr12	108562638	108562639	ENSG00000136003.16:ENST00000311893.14:chr12:108562638:+	1,88	+
chr12	108562662	108562663	ENSG00000136003.16:ENST00000311893.14:chr12:108562662:+	1,90	+
chr12	108564307	108564308	ENSG00000136003.16:ENST00000311893.14:chr12:108564307:+	1,90	+
chr12	108564350	108564351	ENSG00000136003.16:ENST00000311893.14:chr12:108564350:+	2,90	+
chr12	108565366	108565367	ENSG00000136003.16:ENST00000311893.14:chr12:108565366:+	1,90	+
chr12	108567215	108567216	ENSG00000136003.16:ENST00000311893.14:chr12:108567215:+	2,90	+
chr12	108567217	108567218	ENSG00000136003.16:ENST00000311893.14:chr12:108567217:+	1,90	+
chr12	108567224	108567225	ENSG00000136003.16:ENST00000311893.14:chr12:108567224:+	1,90	+
chr12	108567255	108567256	ENSG00000136003.16:ENST00000311893.14:chr12:108567255:+	1,90	+
chr12	108567260	108567261	ENSG00000136003.16:ENST00000311893.14:chr12:108567260:+	2,90	+
chr12	108568870	108568871	ENSG00000136003.16:ENST00000311893.14:chr12:108568870:+	2,90	+
chr12	108568880	108568881	ENSG00000136003.16:ENST00000311893.14:chr12:108568880:+	2,90	+
chr12	120200760	120200761	ENSG00000089157.16:ENST00000313104.9:chr12:120200760:-	1,44	-
chr12	120199323	120199324	ENSG00000089157.16:ENST00000313104.9:chr12:120199323:-	1,45	-
chr12	120198856	120198857	ENSG00000089157.16:ENST00000313104.9:chr12:120198856:-	3,46	-
chr12	120198877	120198878	ENSG00000089157.16:ENST00000313104.9:chr12:120198877:-	1,46	-
chr12	120196848	120196849	ENSG00000089157.16:ENST00000313104.9:chr12:120196848:-	1,46	-
chr12	120196893	120196894	ENSG00000089157.16:ENST00000313104.9:chr12:120196893:-	1,46	-
chr12	122981157	122981158	ENSG00000182196.14:ENST00000315580.10:chr12:122981157:+	1,32	+
chr12	122981575	122981576	ENSG00000182196.14:ENST00000315580.10:chr12:122981575:+	1,34	+
chr12	122981630	122981631	ENSG00000182196.14:ENST00000315580.10:chr12:122981630:+	1,34	+
chr12	122981838	122981839	ENSG00000182196.14:ENST00000315580.10:chr12:122981838:+	1,34	+
chr12	122981847	122981848	ENSG00000182196.14:ENST00000315580.10:chr12:122981847:+	1,34	+
chr12	122981997	122981998	ENSG00000182196.14:ENST00000315580.10:chr12:122981997:+	1,34	+
chr12	132687753	132687754	ENSG00000176894.10:ENST00000317479.8:chr12:132687753:+	1,70	+
chr12	132687776	132687777	ENSG00000176894.10:ENST00000317479.8:chr12:132687776:+	2,70	+
chr12	132695910	132695911	ENSG00000176894.10:ENST00000317479.8:chr12:132695910:+	1,71	+
chr12	132695919	132695920	ENSG00000176894.10:ENST00000317479.8:chr12:132695919:+	1,71	+
chr12	132696009	132696010	ENSG00000176894.10:ENST00000317479.8:chr12:132696009:+	1,71	+
chr12	132696036	132696037	ENSG00000176894.10:ENST00000317479.8:chr12:132696036:+	1,71	+
chr12	132701257	132701258	ENSG00000176894.10:ENST00000317479.8:chr12:132701257:+	1,71	+
chr12	132701314	132701315	ENSG00000176894.10:ENST00000317479.8:chr12:132701314:+	1,71	+
chr12	132701328	132701329	ENSG00000176894.10:ENST00000317479.8:chr12:132701328:+	1,71	+
chr12	132701336	132701337	ENSG00000176894.10:ENST00000317479.8:chr12:132701336:+	1,71	+
chr13	21176387	21176388	ENSG00000165480.16:ENST00000314759.6:chr13:21176387:-	1,43	-
chr13	21172666	21172667	ENSG00000165480.16:ENST00000314759.6:chr13:21172666:-	1,43	-
chr13	21172679	21172680	ENSG00000165480.16:ENST00000314759.6:chr13:21172679:-	1,43	-
chr13	21168108	21168109	ENSG00000165480.16:ENST00000314759.6:chr13:21168108:-	1,42	-
chr13	21168201	21168202	ENSG00000165480.16:ENST00000314759.6:chr13:21168201:-	1,43	-
chr13	21168314	21168315	ENSG00000165480.16:ENST00000314759.6:chr13:21168314:-	1,43	-
chr13	21168394	21168395	ENSG00000165480.16:ENST00000314759.6:chr13:21168394:-	1,43	-
chr13	21161811	21161812	ENSG00000165480.16:ENST00000314759.6:chr13:21161811:-	1,42	-
chr13	21159944	21159945	ENSG00000165480.16:ENST00000314759.6:chr13:21159944:-	1,42	-
chr13	21158015	21158016	ENSG00000165480.16:ENST00000314759.6:chr13:21158015:-	1,42	-
chr13	21155791	21155792	ENSG00000165480.16:ENST00000314759.6:chr13:21155791:-	1,42	-
chr13	27255314	27255315	ENSG00000122026.11:ENST00000311549.11:chr13:27255314:+	1,5	+
chr13	27256262	27256263	ENSG00000122026.11:ENST00000311549.11:chr13:27256262:+	2,5	+
chr13	27256322	27256323	ENSG00000122026.11:ENST00000311549.11:chr13:27256322:+	1,5	+
chr14	22836850	22836851	ENSG00000157227.14:ENST00000311852.11:chr14:22836850:+	1,47	+
chr14	22836864	22836865	ENSG00000157227.14:ENST00000311852.11:chr14:22836864:+	1,47	+
chr14	22836866	22836867	ENSG00000157227.14:ENST00000311852.11:chr14:22836866:+	1,47	+
chr14	22836880	22836881	ENSG00000157227.14:ENST00000311852.11:chr14:22836880:+	1,47	+
chr14	22841528	22841529	ENSG00000157227.14:ENST00000311852.11:chr14:22841528:+	1,47	+
chr14	22841532	22841533	ENSG00000157227.14:ENST00000311852.11:chr14:22841532:+	1,47	+
chr14	22841562	22841563	ENSG00000157227.14:ENST00000311852.11:chr14:22841562:+	1,47	+
chr14	22841564	22841565	ENSG00000157227.14:ENST00000311852.11:chr14:22841564:+	1,47	+
chr14	22841611	22841612	ENSG00000157227.14:ENST00000311852.11:chr14:22841611:+	1,47	+
chr14	22842003	22842004	ENSG00000157227.14:ENST00000311852.11:chr14:22842003:+	1,48	+
chr14	22842005	22842006	ENSG00000157227.14:ENST00000311852.11:chr14:22842005:+	1,48	+
chr14	22842637	22842638	ENSG00000157227.14:ENST00000311852.11:chr14:22842637:+	1,48	+
chr14	22842652	22842653	ENSG00000157227.14:ENST00000311852.11:chr14:22842652:+	1,48	+
chr14	22843754	22843755	ENSG00000157227.14:ENST00000311852.11:chr14:22843754:+	1,48	+
chr14	22844467	22844468	ENSG00000157227.14:ENST00000311852.11:chr14:22844467:+	1,48	+
chr14	22844501	22844502	ENSG00000157227.14:ENST00000311852.11:chr14:22844501:+	1,48	+
chr14	22844659	22844660	ENSG00000157227.14:ENST00000311852.11:chr14:22844659:+	1,48	+
chr14	22845253	22845254	ENSG00000157227.14:ENST00000311852.11:chr14:22845253:+	1,48	+
chr14	22845326	22845327	ENSG00000157227.14:ENST00000311852.11:chr14:22845326:+	1,48	+
chr14	22845713	22845714	ENSG00000157227.14:ENST00000311852.11:chr14:22845713:+	1,48	+
chr14	22845801	22845802	ENSG00000157227.14:ENST00000311852.11:chr14:22845801:+	1,48	+
chr14	22845958	22845959	ENSG00000157227.14:ENST00000311852.11:chr14:22845958:+	1,48	+
chr14	22845989	22845990	ENSG00000157227.14:ENST00000311852.11:chr14:22845989:+	1,46	+
chr14	103715890	103715891	ENSG00000100711.14:ENST00000311141.7:chr14:103715890:+	1123	+
chr14	103715972	103715973	ENSG00000100711.14:ENST00000311141.7:chr14:103715972:+	1123	+
chr14	103727843	103727844	ENSG00000100711.14:ENST00000311141.7:chr14:103727843:+	1123	+
chr14	103727888	103727889	ENSG00000100711.14:ENST00000311141.7:chr14:103727888:+	1123	+
chr14	103728952	103728953	ENSG00000100711.14:ENST00000311141.7:chr14:103728952:+	1123	+
chr14	103729093	103729094	ENSG00000100711.14:ENST00000311141.7:chr14:103729093:+	2123	+
chr14	103729161	103729162	ENSG00000100711.14:ENST00000311141.7:chr14:103729161:+	1123	+
chr14	103732658	103732659	ENSG00000100711.14:ENST00000311141.7:chr14:103732658:+	1123	+
chr14	103732687	103732688	ENSG00000100711.14:ENST00000311141.7:chr14:103732687:+	1123	+
chr15	65595785	65595786	ENSG00000138614.15:ENST00000313182.6:chr15:65595785:-	1,14	-
chr15	65591676	65591677	ENSG00000138614.15:ENST00000313182.6:chr15:65591676:-	1,14	-
chr15	65584823	65584824	ENSG00000138614.15:ENST00000313182.6:chr15:65584823:-	1,14	-
chr15	65582009	65582010	ENSG00000138614.15:ENST00000313182.6:chr15:65582009:-	1,14	-
chr15	65579568	65579569	ENSG00000138614.15:ENST00000313182.6:chr15:65579568:-	1,14	-
chr15	73984677	73984678	ENSG00000067221.14:ENST00000316911.10:chr15:73984677:-	1,2	-
chr15	75639700	75639701	ENSG00000177971.9:ENST00000314852.2:chr15:75639700:-	1,46	-
chr15	75639850	75639851	ENSG00000177971.9:ENST00000314852.2:chr15:75639850:-	1,46	-
chr15	75639868	75639869	ENSG00000177971.9:ENST00000314852.2:chr15:75639868:-	1,46	-
chr15	75640093	75640094	ENSG00000177971.9:ENST00000314852.2:chr15:75640093:-	1,46	-
chr15	88465588	88465589	ENSG00000259494.2:ENST00000312475.5:chr15:88465588:-	2,83	-
chr15	88465689	88465690	ENSG00000259494.2:ENST00000312475.5:chr15:88465689:-	1,81	-
chr15	88465709	88465710	ENSG00000259494.2:ENST00000312475.5:chr15:88465709:-	1,81	-
chr15	88464723	88464724	ENSG00000259494.2:ENST00000312475.5:chr15:88464723:-	1,84	-
chr15	88464738	88464739	ENSG00000259494.2:ENST00000312475.5:chr15:88464738:-	1,83	-
chr15	88464855	88464856	ENSG00000259494.2:ENST00000312475.5:chr15:88464855:-	1,83	-
chr15	88459753	88459754	ENSG00000259494.2:ENST00000312475.5:chr15:88459753:-	1,84	-
chr15	88459807	88459808	ENSG00000259494.2:ENST00000312475.5:chr15:88459807:-	1,84	-
chr15	88459811	88459812	ENSG00000259494.2:ENST00000312475.5:chr15:88459811:-	1,84	-
chr15	88459813	88459814	ENSG00000259494.2:ENST00000312475.5:chr15:88459813:-	1,84	-
chr15	88459855	88459856	ENSG00000259494.2:ENST00000312475.5:chr15:88459855:-	1,84	-
chr16	668382	668383	ENSG00000140983.14:ENST00000315082.9:chr16:668382:+	1116	+
chr16	668512	668513	ENSG00000140983.14:ENST00000315082.9:chr16:668512:+	1118	+
chr16	668528	668529	ENSG00000140983.14:ENST00000315082.9:chr16:668528:+	1119	+
chr16	668530	668531	ENSG00000140983.14:ENST00000315082.9:chr16:668530:+	1118	+
chr16	668552	668553	ENSG00000140983.14:ENST00000315082.9:chr16:668552:+	1119	+
chr16	668564	668565	ENSG00000140983.14:ENST00000315082.9:chr16:668564:+	1119	+
chr16	668667	668668	ENSG00000140983.14:ENST00000315082.9:chr16:668667:+	2119	+
chr16	668695	668696	ENSG00000140983.14:ENST00000315082.9:chr16:668695:+	1119	+
chr16	669557	669558	ENSG00000140983.14:ENST00000315082.9:chr16:669557:+	2119	+
chr16	670159	670160	ENSG00000140983.14:ENST00000315082.9:chr16:670159:+	1119	+
chr16	670260	670261	ENSG00000140983.14:ENST00000315082.9:chr16:670260:+	2110	+
chr16	670314	670315	ENSG00000140983.14:ENST00000315082.9:chr16:670314:+	1119	+
chr16	670488	670489	ENSG00000140983.14:ENST00000315082.9:chr16:670488:+	1119	+
chr16	670499	670500	ENSG00000140983.14:ENST00000315082.9:chr16:670499:+	1119	+
chr16	670702	670703	ENSG00000140983.14:ENST00000315082.9:chr16:670702:+	1119	+
chr16	670736	670737	ENSG00000140983.14:ENST00000315082.9:chr16:670736:+	1119	+
chr16	670743	670744	ENSG00000140983.14:ENST00000315082.9:chr16:670743:+	1119	+
chr16	670751	670752	ENSG00000140983.14:ENST00000315082.9:chr16:670751:+	1119	+
chr16	670983	670984	ENSG00000140983.14:ENST00000315082.9:chr16:670983:+	1119	+
chr16	670991	670992	ENSG00000140983.14:ENST00000315082.9:chr16:670991:+	1119	+
chr16	671098	671099	ENSG00000140983.14:ENST00000315082.9:chr16:671098:+	1119	+
chr16	671100	671101	ENSG00000140983.14:ENST00000315082.9:chr16:671100:+	2119	+
chr16	671107	671108	ENSG00000140983.14:ENST00000315082.9:chr16:671107:+	1119	+
chr16	671702	671703	ENSG00000140983.14:ENST00000315082.9:chr16:671702:+	1119	+
chr16	671736	671737	ENSG00000140983.14:ENST00000315082.9:chr16:671736:+	1119	+
chr16	671947	671948	ENSG00000140983.14:ENST00000315082.9:chr16:671947:+	1119	+
chr16	671966	671967	ENSG00000140983.14:ENST00000315082.9:chr16:671966:+	1117	+
chr16	672001	672002	ENSG00000140983.14:ENST00000315082.9:chr16:672001:+	1119	+
chr16	672091	672092	ENSG00000140983.14:ENST00000315082.9:chr16:672091:+	1119	+
chr16	672092	672093	ENSG00000140983.14:ENST00000315082.9:chr16:672092:+	1119	+
chr16	672095	672096	ENSG00000140983.14:ENST00000315082.9:chr16:672095:+	1119	+
chr16	672131	672132	ENSG00000140983.14:ENST00000315082.9:chr16:672131:+	2118	+
chr16	672141	672142	ENSG00000140983.14:ENST00000315082.9:chr16:672141:+	1119	+
chr16	672258	672259	ENSG00000140983.14:ENST00000315082.9:chr16:672258:+	1119	+
chr16	672275	672276	ENSG00000140983.14:ENST00000315082.9:chr16:672275:+	1119	+
chr16	672346	672347	ENSG00000140983.14:ENST00000315082.9:chr16:672346:+	2119	+
chr16	672362	672363	ENSG00000140983.14:ENST00000315082.9:chr16:672362:+	1119	+
chr16	672366	672367	ENSG00000140983.14:ENST00000315082.9:chr16:672366:+	2119	+
chr16	672529	672530	ENSG00000140983.14:ENST00000315082.9:chr16:672529:+	1119	+
chr16	672531	672532	ENSG00000140983.14:ENST00000315082.9:chr16:672531:+	1119	+
chr16	672559	672560	ENSG00000140983.14:ENST00000315082.9:chr16:672559:+	3118	+
chr16	672718	672719	ENSG00000140983.14:ENST00000315082.9:chr16:672718:+	2119	+
chr16	672788	672789	ENSG00000140983.14:ENST00000315082.9:chr16:672788:+	2119	+
chr16	672821	672822	ENSG00000140983.14:ENST00000315082.9:chr16:672821:+	1119	+
chr16	672935	672936	ENSG00000140983.14:ENST00000315082.9:chr16:672935:+	1119	+
chr16	672949	672950	ENSG00000140983.14:ENST00000315082.9:chr16:672949:+	2119	+
chr16	673050	673051	ENSG00000140983.14:ENST00000315082.9:chr16:673050:+	1118	+
chr16	673061	673062	ENSG00000140983.14:ENST00000315082.9:chr16:673061:+	1119	+
chr16	673063	673064	ENSG00000140983.14:ENST00000315082.9:chr16:673063:+	1119	+
chr16	673074	673075	ENSG00000140983.14:ENST00000315082.9:chr16:673074:+	1119	+
chr16	673102	673103	ENSG00000140983.14:ENST00000315082.9:chr16:673102:+	1119	+
chr16	673114	673115	ENSG00000140983.14:ENST00000315082.9:chr16:673114:+	1119	+
chr16	673124	673125	ENSG00000140983.14:ENST00000315082.9:chr16:673124:+	1119	+
chr16	673563	673564	ENSG00000140983.14:ENST00000315082.9:chr16:673563:+	1119	+
chr16	673576	673577	ENSG00000140983.14:ENST00000315082.9:chr16:673576:+	1119	+
chr16	673581	673582	ENSG00000140983.14:ENST00000315082.9:chr16:673581:+	1119	+
chr16	28975155	28975156	ENSG00000169682.18:ENST00000311008.16:chr16:28975155:+	1,70	+
chr16	28975165	28975166	ENSG00000169682.18:ENST00000311008.16:chr16:28975165:+	4,70	+
chr16	28975204	28975205	ENSG00000169682.18:ENST00000311008.16:chr16:28975204:+	2,70	+
chr16	28975300	28975301	ENSG00000169682.18:ENST00000311008.16:chr16:28975300:+	1,70	+
chr16	28975366	28975367	ENSG00000169682.18:ENST00000311008.16:chr16:28975366:+	2,70	+
chr16	28975504	28975505	ENSG00000169682.18:ENST00000311008.16:chr16:28975504:+	1,70	+
chr16	28975507	28975508	ENSG00000169682.18:ENST00000311008.16:chr16:28975507:+	1,70	+
chr16	28975546	28975547	ENSG00000169682.18:ENST00000311008.16:chr16:28975546:+	1,70	+
chr16	28977923	28977924	ENSG00000169682.18:ENST00000311008.16:chr16:28977923:+	2,70	+
chr16	28977947	28977948	ENSG00000169682.18:ENST00000311008.16:chr16:28977947:+	1,70	+
chr16	28978001	28978002	ENSG00000169682.18:ENST00000311008.16:chr16:28978001:+	1,70	+
chr16	28979219	28979220	ENSG00000169682.18:ENST00000311008.16:chr16:28979219:+	1,70	+
chr16	28979273	28979274	ENSG00000169682.18:ENST00000311008.16:chr16:28979273:+	1,70	+
chr16	28979285	28979286	ENSG00000169682.18:ENST00000311008.16:chr16:28979285:+	1,70	+
chr16	28979416	28979417	ENSG00000169682.18:ENST00000311008.16:chr16:28979416:+	1,70	+
chr16	28981499	28981500	ENSG00000169682.18:ENST00000311008.16:chr16:28981499:+	1,70	+
chr16	28981563	28981564	ENSG00000169682.18:ENST00000311008.16:chr16:28981563:+	1,70	+
chr16	28981578	28981579	ENSG00000169682.18:ENST00000311008.16:chr16:28981578:+	1,70	+
chr16	28981581	28981582	ENSG00000169682.18:ENST00000311008.16:chr16:28981581:+	1,70	+
chr16	28981595	28981596	ENSG00000169682.18:ENST00000311008.16:chr16:28981595:+	2,70	+
chr16	28981927	28981928	ENSG00000169682.18:ENST00000311008.16:chr16:28981927:+	1,70	+
chr16	28981964	28981965	ENSG00000169682.18:ENST00000311008.16:chr16:28981964:+	1,70	+
chr16	28982013	28982014	ENSG00000169682.18:ENST00000311008.16:chr16:28982013:+	1,70	+
chr16	28982035	28982036	ENSG00000169682.18:ENST00000311008.16:chr16:28982035:+	1,70	+
chr16	28982368	28982369	ENSG00000169682.18:ENST00000311008.16:chr16:28982368:+	1,70	+
chr16	28982438	28982439	ENSG00000169682.18:ENST00000311008.16:chr16:28982438:+	1,70	+
chr16	28982471	28982472	ENSG00000169682.18:ENST00000311008.16:chr16:28982471:+	1,70	+
chr16	28982478	28982479	ENSG00000169682.18:ENST00000311008.16:chr16:28982478:+	1,70	+
chr16	28982491	28982492	ENSG00000169682.18:ENST00000311008.16:chr16:28982491:+	1,70	+
chr16	28982867	28982868	ENSG00000169682.18:ENST00000311008.16:chr16:28982867:+	1,70	+
chr16	28982878	28982879	ENSG00000169682.18:ENST00000311008.16:chr16:28982878:+	1,70	+
chr16	28982916	28982917	ENSG00000169682.18:ENST00000311008.16:chr16:28982916:+	1,70	+
chr16	28983242	28983243	ENSG00000169682.18:ENST00000311008.16:chr16:28983242:+	1,70	+
chr16	28983899	28983900	ENSG00000169682.18:ENST00000311008.16:chr16:28983899:+	1,70	+
chr16	28984228	28984229	ENSG00000169682.18:ENST00000311008.16:chr16:28984228:+	1,70	+
chr16	28984264	28984265	ENSG00000169682.18:ENST00000311008.16:chr16:28984264:+	1,70	+
chr16	69133505	69133506	ENSG00000141076.18:ENST00000314423.12:chr16:69133505:+	1312	+
chr16	69133574	69133575	ENSG00000141076.18:ENST00000314423.12:chr16:69133574:+	1312	+
chr16	69133605	69133606	ENSG00000141076.18:ENST00000314423.12:chr16:69133605:+	1312	+
chr16	69136757	69136758	ENSG00000141076.18:ENST00000314423.12:chr16:69136757:+	2312	+
chr16	69136800	69136801	ENSG00000141076.18:ENST00000314423.12:chr16:69136800:+	3312	+
chr16	69136842	69136843	ENSG00000141076.18:ENST00000314423.12:chr16:69136842:+	1310	+
chr16	69136853	69136854	ENSG00000141076.18:ENST00000314423.12:chr16:69136853:+	1312	+
chr16	69137827	69137828	ENSG00000141076.18:ENST00000314423.12:chr16:69137827:+	1313	+
chr16	69137840	69137841	ENSG00000141076.18:ENST00000314423.12:chr16:69137840:+	1312	+
chr16	69139864	69139865	ENSG00000141076.18:ENST00000314423.12:chr16:69139864:+	3313	+
chr16	69139878	69139879	ENSG00000141076.18:ENST00000314423.12:chr16:69139878:+	1312	+
chr16	69143255	69143256	ENSG00000141076.18:ENST00000314423.12:chr16:69143255:+	1314	+
chr16	69143289	69143290	ENSG00000141076.18:ENST00000314423.12:chr16:69143289:+	1314	+
chr16	69143324	69143325	ENSG00000141076.18:ENST00000314423.12:chr16:69143324:+	1314	+
chr16	69143330	69143331	ENSG00000141076.18:ENST00000314423.12:chr16:69143330:+	2314	+
chr16	69150603	69150604	ENSG00000141076.18:ENST00000314423.12:chr16:69150603:+	4314	+
chr16	69150655	69150656	ENSG00000141076.18:ENST00000314423.12:chr16:69150655:+	1314	+
chr16	69150657	69150658	ENSG00000141076.18:ENST00000314423.12:chr16:69150657:+	1314	+
chr16	69150659	69150660	ENSG00000141076.18:ENST00000314423.12:chr16:69150659:+	1314	+
chr16	69150702	69150703	ENSG00000141076.18:ENST00000314423.12:chr16:69150702:+	1313	+
chr16	69150841	69150842	ENSG00000141076.18:ENST00000314423.12:chr16:69150841:+	1314	+
chr16	69150880	69150881	ENSG00000141076.18:ENST00000314423.12:chr16:69150880:+	1314	+
chr16	69150893	69150894	ENSG00000141076.18:ENST00000314423.12:chr16:69150893:+	1314	+
chr16	69150898	69150899	ENSG00000141076.18:ENST00000314423.12:chr16:69150898:+	1313	+
chr16	69153596	69153597	ENSG00000141076.18:ENST00000314423.12:chr16:69153596:+	1315	+
chr16	69153642	69153643	ENSG00000141076.18:ENST00000314423.12:chr16:69153642:+	2315	+
chr16	69153649	69153650	ENSG00000141076.18:ENST00000314423.12:chr16:69153649:+	1315	+
chr16	69153665	69153666	ENSG00000141076.18:ENST00000314423.12:chr16:69153665:+	1315	+
chr16	69153677	69153678	ENSG00000141076.18:ENST00000314423.12:chr16:69153677:+	1315	+
chr16	69154413	69154414	ENSG00000141076.18:ENST00000314423.12:chr16:69154413:+	1315	+
chr16	69155887	69155888	ENSG00000141076.18:ENST00000314423.12:chr16:69155887:+	1315	+
chr16	69155948	69155949	ENSG00000141076.18:ENST00000314423.12:chr16:69155948:+	1315	+
chr16	69155986	69155987	ENSG00000141076.18:ENST00000314423.12:chr16:69155986:+	1315	+
chr16	69157144	69157145	ENSG00000141076.18:ENST00000314423.12:chr16:69157144:+	1315	+
chr16	69157174	69157175	ENSG00000141076.18:ENST00000314423.12:chr16:69157174:+	1315	+
chr16	69157222	69157223	ENSG00000141076.18:ENST00000314423.12:chr16:69157222:+	1315	+
chr16	69157226	69157227	ENSG00000141076.18:ENST00000314423.12:chr16:69157226:+	1315	+
chr16	69157233	69157234	ENSG00000141076.18:ENST00000314423.12:chr16:69157233:+	1315	+
chr16	69160358	69160359	ENSG00000141076.18:ENST00000314423.12:chr16:69160358:+	3307	+
chr16	69160446	69160447	ENSG00000141076.18:ENST00000314423.12:chr16:69160446:+	4315	+
chr16	69163092	69163093	ENSG00000141076.18:ENST00000314423.12:chr16:69163092:+	1315	+
chr16	69165400	69165401	ENSG00000141076.18:ENST00000314423.12:chr16:69165400:+	2315	+
chr16	69165411	69165412	ENSG00000141076.18:ENST00000314423.12:chr16:69165411:+	1315	+
chr16	69165434	69165435	ENSG00000141076.18:ENST00000314423.12:chr16:69165434:+	1315	+
chr16	69165469	69165470	ENSG00000141076.18:ENST00000314423.12:chr16:69165469:+	1314	+
chr16	69165475	69165476	ENSG00000141076.18:ENST00000314423.12:chr16:69165475:+	1315	+
chr16	69165477	69165478	ENSG00000141076.18:ENST00000314423.12:chr16:69165477:+	3315	+
chr16	69167075	69167076	ENSG00000141076.18:ENST00000314423.12:chr16:69167075:+	1315	+
chr16	69167077	69167078	ENSG00000141076.18:ENST00000314423.12:chr16:69167077:+	1315	+
chr16	69167100	69167101	ENSG00000141076.18:ENST00000314423.12:chr16:69167100:+	2315	+
chr16	69167107	69167108	ENSG00000141076.18:ENST00000314423.12:chr16:69167107:+	1315	+
chr16	87383460	87383461	ENSG00000103264.18:ENST00000311635.12:chr16:87383460:-	1,14	-
chr16	87347187	87347188	ENSG00000103264.18:ENST00000311635.12:chr16:87347187:-	1,14	-
chr16	87336156	87336157	ENSG00000103264.18:ENST00000311635.12:chr16:87336156:-	1,14	-
chr16	87336216	87336217	ENSG00000103264.18:ENST00000311635.12:chr16:87336216:-	1,14	-
chr16	87331437	87331438	ENSG00000103264.18:ENST00000311635.12:chr16:87331437:-	1,14	-
chr16	89923453	89923454	ENSG00000258947.8:ENST00000315491.12:chr16:89923453:+	1,81	+
chr16	89932572	89932573	ENSG00000258947.8:ENST00000315491.12:chr16:89932572:+	1,82	+
chr16	89932617	89932618	ENSG00000258947.8:ENST00000315491.12:chr16:89932617:+	1,84	+
chr16	89932620	89932621	ENSG00000258947.8:ENST00000315491.12:chr16:89932620:+	2,84	+
chr16	89932629	89932630	ENSG00000258947.8:ENST00000315491.12:chr16:89932629:+	1,84	+
chr16	89932676	89932677	ENSG00000258947.8:ENST00000315491.12:chr16:89932676:+	1,84	+
chr16	89933471	89933472	ENSG00000258947.8:ENST00000315491.12:chr16:89933471:+	2,84	+
chr16	89933522	89933523	ENSG00000258947.8:ENST00000315491.12:chr16:89933522:+	1,84	+
chr16	89933540	89933541	ENSG00000258947.8:ENST00000315491.12:chr16:89933540:+	1,84	+
chr16	89933550	89933551	ENSG00000258947.8:ENST00000315491.12:chr16:89933550:+	1,84	+
chr16	89933552	89933553	ENSG00000258947.8:ENST00000315491.12:chr16:89933552:+	1,84	+
chr16	89934770	89934771	ENSG00000258947.8:ENST00000315491.12:chr16:89934770:+	1,84	+
chr16	89934878	89934879	ENSG00000258947.8:ENST00000315491.12:chr16:89934878:+	2,84	+
chr16	89934977	89934978	ENSG00000258947.8:ENST00000315491.12:chr16:89934977:+	1,84	+
chr16	89934999	89935000	ENSG00000258947.8:ENST00000315491.12:chr16:89934999:+	1,84	+
chr16	89935059	89935060	ENSG00000258947.8:ENST00000315491.12:chr16:89935059:+	3,84	+
chr16	89935106	89935107	ENSG00000258947.8:ENST00000315491.12:chr16:89935106:+	3,84	+
chr16	89935160	89935161	ENSG00000258947.8:ENST00000315491.12:chr16:89935160:+	1,84	+
chr16	89935197	89935198	ENSG00000258947.8:ENST00000315491.12:chr16:89935197:+	2,84	+
chr16	89935230	89935231	ENSG00000258947.8:ENST00000315491.12:chr16:89935230:+	2,83	+
chr16	89935232	89935233	ENSG00000258947.8:ENST00000315491.12:chr16:89935232:+	1,84	+
chr16	89935242	89935243	ENSG00000258947.8:ENST00000315491.12:chr16:89935242:+	1,84	+
chr16	89935257	89935258	ENSG00000258947.8:ENST00000315491.12:chr16:89935257:+	1,84	+
chr16	89935293	89935294	ENSG00000258947.8:ENST00000315491.12:chr16:89935293:+	1,84	+
chr16	89935317	89935318	ENSG00000258947.8:ENST00000315491.12:chr16:89935317:+	1,84	+
chr16	89935337	89935338	ENSG00000258947.8:ENST00000315491.12:chr16:89935337:+	1,84	+
chr16	89935362	89935363	ENSG00000258947.8:ENST00000315491.12:chr16:89935362:+	1,84	+
chr16	89935394	89935395	ENSG00000258947.8:ENST00000315491.12:chr16:89935394:+	1,84	+
chr16	89935449	89935450	ENSG00000258947.8:ENST00000315491.12:chr16:89935449:+	1,84	+
chr16	89935494	89935495	ENSG00000258947.8:ENST00000315491.12:chr16:89935494:+	1,84	+
chr16	89935515	89935516	ENSG00000258947.8:ENST00000315491.12:chr16:89935515:+	1,84	+
chr16	89935533	89935534	ENSG00000258947.8:ENST00000315491.12:chr16:89935533:+	1,84	+
chr16	89935544	89935545	ENSG00000258947.8:ENST00000315491.12:chr16:89935544:+	1,84	+
chr16	89935607	89935608	ENSG00000258947.8:ENST00000315491.12:chr16:89935607:+	1,84	+
chr16	89935638	89935639	ENSG00000258947.8:ENST00000315491.12:chr16:89935638:+	1,84	+
chr16	89935676	89935677	ENSG00000258947.8:ENST00000315491.12:chr16:89935676:+	1,84	+
chr16	89935761	89935762	ENSG00000258947.8:ENST00000315491.12:chr16:89935761:+	2,84	+
chr17	18355897	18355898	ENSG00000176974.20:ENST00000316694.8:chr17:18355897:-	1,23	-
chr17	18355924	18355925	ENSG00000176974.20:ENST00000316694.8:chr17:18355924:-	1,23	-
chr17	18348340	18348341	ENSG00000176974.20:ENST00000316694.8:chr17:18348340:-	1,23	-
chr17	18347614	18347615	ENSG00000176974.20:ENST00000316694.8:chr17:18347614:-	1,23	-
chr17	18335631	18335632	ENSG00000176974.20:ENST00000316694.8:chr17:18335631:-	3,23	-
chr17	18333257	18333258	ENSG00000176974.20:ENST00000316694.8:chr17:18333257:-	1,23	-
chr17	18329308	18329309	ENSG00000176974.20:ENST00000316694.8:chr17:18329308:-	1,23	-
chr17	75325911	75325912	ENSG00000177885.15:ENST00000316804.10:chr17:75325911:-	1,88	-
chr17	75321713	75321714	ENSG00000177885.15:ENST00000316804.10:chr17:75321713:-	1,88	-
chr17	75321802	75321803	ENSG00000177885.15:ENST00000316804.10:chr17:75321802:-	1,88	-
chr17	76478808	76478809	ENSG00000129667.13:ENST00000313080.8:chr17:76478808:-	1,2	-
chr17	76472728	76472729	ENSG00000129667.13:ENST00000313080.8:chr17:76472728:-	2,2	-
chr17	76472033	76472034	ENSG00000129667.13:ENST00000313080.8:chr17:76472033:-	1,2	-
chr17	82415531	82415532	ENSG00000181396.13:ENST00000313056.10:chr17:82415531:-	1,17	-
chr17	82409373	82409374	ENSG00000181396.13:ENST00000313056.10:chr17:82409373:-	1,18	-
chr17	82406467	82406468	ENSG00000181396.13:ENST00000313056.10:chr17:82406467:-	1,19	-
chr17	82403973	82403974	ENSG00000181396.13:ENST00000313056.10:chr17:82403973:-	1,19	-
chr17	82398259	82398260	ENSG00000181396.13:ENST00000313056.10:chr17:82398259:-	1,19	-
chr18	59900229	59900230	ENSG00000141682.12:ENST00000316660.7:chr18:59900229:+	1208	+
chr18	59902701	59902702	ENSG00000141682.12:ENST00000316660.7:chr18:59902701:+	1208	+
chr18	59902748	59902749	ENSG00000141682.12:ENST00000316660.7:chr18:59902748:+	1208	+
chr19	1917716	1917717	ENSG00000227500.10:ENST00000316097.13:chr19:1917716:+	1144	+
chr19	1917790	1917791	ENSG00000227500.10:ENST00000316097.13:chr19:1917790:+	1144	+
chr19	1918138	1918139	ENSG00000227500.10:ENST00000316097.13:chr19:1918138:+	1143	+
chr19	1918195	1918196	ENSG00000227500.10:ENST00000316097.13:chr19:1918195:+	1145	+
chr19	1918232	1918233	ENSG00000227500.10:ENST00000316097.13:chr19:1918232:+	1145	+
chr19	1918234	1918235	ENSG00000227500.10:ENST00000316097.13:chr19:1918234:+	1145	+
chr19	1918241	1918242	ENSG00000227500.10:ENST00000316097.13:chr19:1918241:+	2145	+
chr19	1918268	1918269	ENSG00000227500.10:ENST00000316097.13:chr19:1918268:+	1145	+
chr19	1918280	1918281	ENSG00000227500.10:ENST00000316097.13:chr19:1918280:+	2145	+
chr19	1918909	1918910	ENSG00000227500.10:ENST00000316097.13:chr19:1918909:+	1145	+
chr19	1918921	1918922	ENSG00000227500.10:ENST00000316097.13:chr19:1918921:+	1145	+
chr19	1918954	1918955	ENSG00000227500.10:ENST00000316097.13:chr19:1918954:+	2146	+
chr19	1918957	1918958	ENSG00000227500.10:ENST00000316097.13:chr19:1918957:+	1146	+
chr19	1923138	1923139	ENSG00000227500.10:ENST00000316097.13:chr19:1923138:+	1146	+
chr19	1923174	1923175	ENSG00000227500.10:ENST00000316097.13:chr19:1923174:+	1146	+
chr19	1924156	1924157	ENSG00000227500.10:ENST00000316097.13:chr19:1924156:+	1146	+
chr19	1924211	1924212	ENSG00000227500.10:ENST00000316097.13:chr19:1924211:+	1146	+
chr19	1924214	1924215	ENSG00000227500.10:ENST00000316097.13:chr19:1924214:+	1146	+
chr19	6743541	6743542	ENSG00000125733.18:ENST00000313244.14:chr19:6743541:+	1,5	+
chr19	39391530	39391531	ENSG00000063322.15:ENST00000315588.11:chr19:39391530:+	1,3	+
chrX	1593752	1593753	ENSG00000197976.12:ENST00000313871.9:chrX:1593752:+	1,16	+
chrX	1593836	1593837	ENSG00000197976.12:ENST00000313871.9:chrX:1593836:+	1,16	+
chrX	1599195	1599196	ENSG00000197976.12:ENST00000313871.9:chrX:1599195:+	1,18	+
chrX	1601081	1601082	ENSG00000197976.12:ENST00000313871.9:chrX:1601081:+	1,19	+
chrX	1601451	1601452	ENSG00000197976.12:ENST00000313871.9:chrX:1601451:+	1,20	+
chrX	49043112	49043113	ENSG00000068323.17:ENST00000315869.8:chrX:49043112:-	1110	-
chrX	49043127	49043128	ENSG00000068323.17:ENST00000315869.8:chrX:49043127:-	2110	-
chrX	49040461	49040462	ENSG00000068323.17:ENST00000315869.8:chrX:49040461:-	1110	-
chrX	49040528	49040529	ENSG00000068323.17:ENST00000315869.8:chrX:49040528:-	1110	-
chrX	49039152	49039153	ENSG00000068323.17:ENST00000315869.8:chrX:49039152:-	1110	-
chrX	49039182	49039183	ENSG00000068323.17:ENST00000315869.8:chrX:49039182:-	1110	-
chrX	49039356	49039357	ENSG00000068323.17:ENST00000315869.8:chrX:49039356:-	1110	-
chrX	49039366	49039367	ENSG00000068323.17:ENST00000315869.8:chrX:49039366:-	1110	-
chrX	49039384	49039385	ENSG00000068323.17:ENST00000315869.8:chrX:49039384:-	1110	-
chrX	49039386	49039387	ENSG00000068323.17:ENST00000315869.8:chrX:49039386:-	1110	-
chrX	49038236	49038237	ENSG00000068323.17:ENST00000315869.8:chrX:49038236:-	1110	-
chrX	49038241	49038242	ENSG00000068323.17:ENST00000315869.8:chrX:49038241:-	1110	-
chrX	49038269	49038270	ENSG00000068323.17:ENST00000315869.8:chrX:49038269:-	2110	-
chrX	49038321	49038322	ENSG00000068323.17:ENST00000315869.8:chrX:49038321:-	1110	-
chrX	49038375	49038376	ENSG00000068323.17:ENST00000315869.8:chrX:49038375:-	1110	-
chrX	49038026	49038027	ENSG00000068323.17:ENST00000315869.8:chrX:49038026:-	1110	-
chrX	49034196	49034197	ENSG00000068323.17:ENST00000315869.8:chrX:49034196:-	1110	-
chrX	49033778	49033779	ENSG00000068323.17:ENST00000315869.8:chrX:49033778:-	2110	-
chrX	49033488	49033489	ENSG00000068323.17:ENST00000315869.8:chrX:49033488:-	1110	-
chrX	49033517	49033518	ENSG00000068323.17:ENST00000315869.8:chrX:49033517:-	1110	-
chrX	49031398	49031399	ENSG00000068323.17:ENST00000315869.8:chrX:49031398:-	1110	-
chrX	49031405	49031406	ENSG00000068323.17:ENST00000315869.8:chrX:49031405:-	1110	-
chrX	49031456	49031457	ENSG00000068323.17:ENST00000315869.8:chrX:49031456:-	1110	-
chrX	49030175	49030176	ENSG00000068323.17:ENST00000315869.8:chrX:49030175:-	1110	-
chrX	49030178	49030179	ENSG00000068323.17:ENST00000315869.8:chrX:49030178:-	1110	-
chrX	49030208	49030209	ENSG00000068323.17:ENST00000315869.8:chrX:49030208:-	1110	-
chrX	49030231	49030232	ENSG00000068323.17:ENST00000315869.8:chrX:49030231:-	1110	-
chrX	49030373	49030374	ENSG00000068323.17:ENST00000315869.8:chrX:49030373:-	2110	-
chrX	49030384	49030385	ENSG00000068323.17:ENST00000315869.8:chrX:49030384:-	2110	-
chrX	49030438	49030439	ENSG00000068323.17:ENST00000315869.8:chrX:49030438:-	1110	-
chrX	49030527	49030528	ENSG00000068323.17:ENST00000315869.8:chrX:49030527:-	3110	-
chrX	49030539	49030540	ENSG00000068323.17:ENST00000315869.8:chrX:49030539:-	2110	-
chrX	136246119	136246120	ENSG00000129680.16:ENST00000316077.14:chrX:136246119:-	1,83	-
chrX	136246130	136246131	ENSG00000129680.16:ENST00000316077.14:chrX:136246130:-	1,83	-
chrX	136244777	136244778	ENSG00000129680.16:ENST00000316077.14:chrX:136244777:-	1,83	-
chrX	136240464	136240465	ENSG00000129680.16:ENST00000316077.14:chrX:136240464:-	2,83	-
chrX	136240477	136240478	ENSG00000129680.16:ENST00000316077.14:chrX:136240477:-	1,83	-
chrX	136231678	136231679	ENSG00000129680.16:ENST00000316077.14:chrX:136231678:-	1,83	-
chrX	136231851	136231852	ENSG00000129680.16:ENST00000316077.14:chrX:136231851:-	1,83	-
chrX	136231877	136231878	ENSG00000129680.16:ENST00000316077.14:chrX:136231877:-	1,83	-
chrX	136231924	136231925	ENSG00000129680.16:ENST00000316077.14:chrX:136231924:-	1,83	-
chrX	136231952	136231953	ENSG00000129680.16:ENST00000316077.14:chrX:136231952:-	1,83	-
chrX	136232162	136232163	ENSG00000129680.16:ENST00000316077.14:chrX:136232162:-	2,83	-
chrX	136230531	136230532	ENSG00000129680.16:ENST00000316077.14:chrX:136230531:-	1,83	-
chrX	136227291	136227292	ENSG00000129680.16:ENST00000316077.14:chrX:136227291:-	1,39	-
chrX	136222423	136222424	ENSG00000129680.16:ENST00000316077.14:chrX:136222423:-	1,16	-
chrX	136219434	136219435	ENSG00000129680.16:ENST00000316077.14:chrX:136219434:-	1,15	-
chr1	44660179	44660180	ENSG00000126106.14:ENST00000372237.8:chr1:44660179:-	1,11	-
chr1	44654837	44654838	ENSG00000126106.14:ENST00000372237.8:chr1:44654837:-	1,11	-
chr1	44655188	44655189	ENSG00000126106.14:ENST00000372237.8:chr1:44655188:-	1,11	-
chr1	45331428	45331429	ENSG00000132781.20:ENST00000354383.10:chr1:45331428:-	1,2	-
chr1	45331249	45331250	ENSG00000132781.20:ENST00000354383.10:chr1:45331249:-	1,2	-
chr1	45591241	45591242	ENSG00000132780.17:ENST00000350030.8:chr1:45591241:+	1,15	+
chr1	45607389	45607390	ENSG00000132780.17:ENST00000350030.8:chr1:45607389:+	1,16	+
chr1	45607647	45607648	ENSG00000132780.17:ENST00000350030.8:chr1:45607647:+	1,16	+
chr1	45615309	45615310	ENSG00000132780.17:ENST00000350030.8:chr1:45615309:+	1,15	+
chr1	45616382	45616383	ENSG00000132780.17:ENST00000350030.8:chr1:45616382:+	1,15	+
chr1	45618115	45618116	ENSG00000132780.17:ENST00000350030.8:chr1:45618115:+	1,15	+
chr1	155309923	155309924	ENSG00000160752.15:ENST00000356657.10:chr1:155309923:+	1,12	+
chr1	155310083	155310084	ENSG00000160752.15:ENST00000356657.10:chr1:155310083:+	1,12	+
chr1	155318288	155318289	ENSG00000160752.15:ENST00000356657.10:chr1:155318288:+	1,12	+
chr1	155319910	155319911	ENSG00000160752.15:ENST00000356657.10:chr1:155319910:+	1,12	+
chr1	155320416	155320417	ENSG00000160752.15:ENST00000356657.10:chr1:155320416:+	1,12	+
chr1	155320537	155320538	ENSG00000160752.15:ENST00000356657.10:chr1:155320537:+	1,12	+
chr1	155320590	155320591	ENSG00000160752.15:ENST00000356657.10:chr1:155320590:+	1,12	+
chr1	228107773	228107774	ENSG00000162910.19:ENST00000348259.9:chr1:228107773:-	1,11	-
chr1	228107793	228107794	ENSG00000162910.19:ENST00000348259.9:chr1:228107793:-	1,11	-
chr1	228106828	228106829	ENSG00000162910.19:ENST00000348259.9:chr1:228106828:-	1,11	-
chr2	43979841	43979842	ENSG00000138095.20:ENST00000260665.12:chr2:43979841:-	1,10	-
chr2	43947324	43947325	ENSG00000138095.20:ENST00000260665.12:chr2:43947324:-	1,10	-
chr2	43943732	43943733	ENSG00000138095.20:ENST00000260665.12:chr2:43943732:-	1,10	-
chr2	43943820	43943821	ENSG00000138095.20:ENST00000260665.12:chr2:43943820:-	1,10	-
chr2	43925125	43925126	ENSG00000138095.20:ENST00000260665.12:chr2:43925125:-	1,10	-
chr2	237493506	237493507	ENSG00000115648.14:ENST00000264605.8:chr2:237493506:+	1,37	+
chr2	237527431	237527432	ENSG00000115648.14:ENST00000264605.8:chr2:237527431:+	2,39	+
chr2	237540851	237540852	ENSG00000115648.14:ENST00000264605.8:chr2:237540851:+	1,39	+
chr2	241501483	241501484	ENSG00000115694.15:ENST00000316586.9:chr2:241501483:-	1139	-
chr2	241501495	241501496	ENSG00000115694.15:ENST00000316586.9:chr2:241501495:-	1139	-
chr2	241501703	241501704	ENSG00000115694.15:ENST00000316586.9:chr2:241501703:-	1139	-
chr2	241500176	241500177	ENSG00000115694.15:ENST00000316586.9:chr2:241500176:-	1139	-
chr2	241500226	241500227	ENSG00000115694.15:ENST00000316586.9:chr2:241500226:-	1139	-
chr2	241500251	241500252	ENSG00000115694.15:ENST00000316586.9:chr2:241500251:-	1139	-
chr2	241500255	241500256	ENSG00000115694.15:ENST00000316586.9:chr2:241500255:-	1139	-
chr2	241499265	241499266	ENSG00000115694.15:ENST00000316586.9:chr2:241499265:-	1139	-
chr2	241499399	241499400	ENSG00000115694.15:ENST00000316586.9:chr2:241499399:-	1132	-
chr2	241499003	241499004	ENSG00000115694.15:ENST00000316586.9:chr2:241499003:-	1139	-
chr2	241499006	241499007	ENSG00000115694.15:ENST00000316586.9:chr2:241499006:-	1139	-
chr2	241499168	241499169	ENSG00000115694.15:ENST00000316586.9:chr2:241499168:-	1139	-
chr2	241498722	241498723	ENSG00000115694.15:ENST00000316586.9:chr2:241498722:-	1139	-
chr2	241498725	241498726	ENSG00000115694.15:ENST00000316586.9:chr2:241498725:-	1139	-
chr2	241498754	241498755	ENSG00000115694.15:ENST00000316586.9:chr2:241498754:-	2139	-
chr2	241498264	241498265	ENSG00000115694.15:ENST00000316586.9:chr2:241498264:-	1138	-
chr2	241498278	241498279	ENSG00000115694.15:ENST00000316586.9:chr2:241498278:-	1139	-
chr2	241497624	241497625	ENSG00000115694.15:ENST00000316586.9:chr2:241497624:-	1139	-
chr2	241497643	241497644	ENSG00000115694.15:ENST00000316586.9:chr2:241497643:-	1139	-
chr2	241497672	241497673	ENSG00000115694.15:ENST00000316586.9:chr2:241497672:-	1139	-
chr2	241496428	241496429	ENSG00000115694.15:ENST00000316586.9:chr2:241496428:-	1139	-
chr2	241496436	241496437	ENSG00000115694.15:ENST00000316586.9:chr2:241496436:-	1139	-
chr2	241496447	241496448	ENSG00000115694.15:ENST00000316586.9:chr2:241496447:-	1139	-
chr2	241496451	241496452	ENSG00000115694.15:ENST00000316586.9:chr2:241496451:-	1139	-
chr2	241496519	241496520	ENSG00000115694.15:ENST00000316586.9:chr2:241496519:-	1139	-
chr2	241495682	241495683	ENSG00000115694.15:ENST00000316586.9:chr2:241495682:-	1139	-
chr2	241495693	241495694	ENSG00000115694.15:ENST00000316586.9:chr2:241495693:-	2139	-
chr3	58136016	58136017	ENSG00000136068.16:ENST00000358537.7:chr3:58136016:+	1,5	+
chr3	58138283	58138284	ENSG00000136068.16:ENST00000358537.7:chr3:58138283:+	1,5	+
chr3	58153463	58153464	ENSG00000136068.16:ENST00000358537.7:chr3:58153463:+	1,6	+
chr3	58169779	58169780	ENSG00000136068.16:ENST00000358537.7:chr3:58169779:+	1,6	+
chr3	158571341	158571342	ENSG00000178053.20:ENST00000355893.11:chr3:158571341:+	1,24	+
chr3	158592449	158592450	ENSG00000178053.20:ENST00000355893.11:chr3:158592449:+	2,24	+
chr3	158596865	158596866	ENSG00000178053.20:ENST00000355893.11:chr3:158596865:+	1,24	+
chr3	158596904	158596905	ENSG00000178053.20:ENST00000355893.11:chr3:158596904:+	1,24	+
chr3	158600055	158600056	ENSG00000178053.20:ENST00000355893.11:chr3:158600055:+	1,24	+
chr3	158600090	158600091	ENSG00000178053.20:ENST00000355893.11:chr3:158600090:+	1,24	+
chr3	158602868	158602869	ENSG00000178053.20:ENST00000355893.11:chr3:158602868:+	1,24	+
chr3	158605192	158605193	ENSG00000178053.20:ENST00000355893.11:chr3:158605192:+	2,24	+
chr3	184319726	184319727	ENSG00000114867.22:ENST00000392537.6:chr3:184319726:+	1,10	+
chr3	184321869	184321870	ENSG00000114867.22:ENST00000392537.6:chr3:184321869:+	1,10	+
chr3	184324244	184324245	ENSG00000114867.22:ENST00000392537.6:chr3:184324244:+	1,10	+
chr4	26430018	26430019	ENSG00000168214.21:ENST00000342295.6:chr4:26430018:+	1,5	+
chr5	150393405	150393406	ENSG00000070814.22:ENST00000323668.11:chr5:150393405:+	1,3	+
chr6	15662841	15662842	ENSG00000047579.20:ENST00000344537.10:chr6:15662841:-	1102	-
chr6	15627367	15627368	ENSG00000047579.20:ENST00000344537.10:chr6:15627367:-	1102	-
chr6	15627373	15627374	ENSG00000047579.20:ENST00000344537.10:chr6:15627373:-	1102	-
chr6	15627439	15627440	ENSG00000047579.20:ENST00000344537.10:chr6:15627439:-	2102	-
chr6	15615396	15615397	ENSG00000047579.20:ENST00000344537.10:chr6:15615396:-	1102	-
chr6	15615398	15615399	ENSG00000047579.20:ENST00000344537.10:chr6:15615398:-	1102	-
chr6	15533345	15533346	ENSG00000047579.20:ENST00000344537.10:chr6:15533345:-	1102	-
chr6	15533389	15533390	ENSG00000047579.20:ENST00000344537.10:chr6:15533389:-	1102	-
chr6	15524565	15524566	ENSG00000047579.20:ENST00000344537.10:chr6:15524565:-	1102	-
chr6	15524577	15524578	ENSG00000047579.20:ENST00000344537.10:chr6:15524577:-	1102	-
chr6	15523016	15523017	ENSG00000047579.20:ENST00000344537.10:chr6:15523016:-	2102	-
chr6	15523020	15523021	ENSG00000047579.20:ENST00000344537.10:chr6:15523020:-	1102	-
chr6	15523022	15523023	ENSG00000047579.20:ENST00000344537.10:chr6:15523022:-	1102	-
chr6	130956372	130956373	ENSG00000079819.19:ENST00000337057.8:chr6:130956372:-	1,7	-
chr7	6580590	6580591	ENSG00000136247.15:ENST00000335965.11:chr7:6580590:+	1,76	+
chr7	6580603	6580604	ENSG00000136247.15:ENST00000335965.11:chr7:6580603:+	1,76	+
chr7	6581613	6581614	ENSG00000136247.15:ENST00000335965.11:chr7:6581613:+	2,76	+
chr7	6581636	6581637	ENSG00000136247.15:ENST00000335965.11:chr7:6581636:+	1,76	+
chr7	6581660	6581661	ENSG00000136247.15:ENST00000335965.11:chr7:6581660:+	1,76	+
chr7	6581676	6581677	ENSG00000136247.15:ENST00000335965.11:chr7:6581676:+	1,76	+
chr7	6582078	6582079	ENSG00000136247.15:ENST00000335965.11:chr7:6582078:+	1,76	+
chr7	6582102	6582103	ENSG00000136247.15:ENST00000335965.11:chr7:6582102:+	2,76	+
chr7	6582129	6582130	ENSG00000136247.15:ENST00000335965.11:chr7:6582129:+	1,76	+
chr7	6582160	6582161	ENSG00000136247.15:ENST00000335965.11:chr7:6582160:+	1,76	+
chr7	6582180	6582181	ENSG00000136247.15:ENST00000335965.11:chr7:6582180:+	2,76	+
chr7	6583320	6583321	ENSG00000136247.15:ENST00000335965.11:chr7:6583320:+	1,76	+
chr7	6585208	6585209	ENSG00000136247.15:ENST00000335965.11:chr7:6585208:+	1,76	+
chr7	6585227	6585228	ENSG00000136247.15:ENST00000335965.11:chr7:6585227:+	1,76	+
chr7	6588624	6588625	ENSG00000136247.15:ENST00000335965.11:chr7:6588624:+	1,76	+
chr7	6588670	6588671	ENSG00000136247.15:ENST00000335965.11:chr7:6588670:+	1,76	+
chr7	6588731	6588732	ENSG00000136247.15:ENST00000335965.11:chr7:6588731:+	1,76	+
chr7	6588734	6588735	ENSG00000136247.15:ENST00000335965.11:chr7:6588734:+	1,76	+
chr7	6588829	6588830	ENSG00000136247.15:ENST00000335965.11:chr7:6588829:+	1,76	+
chr7	66087367	66087368	ENSG00000126522.17:ENST00000380839.9:chr7:66087367:+	1,9	+
chr7	66088918	66088919	ENSG00000126522.17:ENST00000380839.9:chr7:66088918:+	1,9	+
chr7	66092863	66092864	ENSG00000126522.17:ENST00000380839.9:chr7:66092863:+	1,9	+
chr7	66092891	66092892	ENSG00000126522.17:ENST00000380839.9:chr7:66092891:+	1,9	+
chr7	116525079	116525080	ENSG00000105974.13:ENST00000341049.7:chr7:116525079:+	1313	+
chr7	116526640	116526641	ENSG00000105974.13:ENST00000341049.7:chr7:116526640:+	1314	+
chr7	116526658	116526659	ENSG00000105974.13:ENST00000341049.7:chr7:116526658:+	1314	+
chr7	116559108	116559109	ENSG00000105974.13:ENST00000341049.7:chr7:116559108:+	1314	+
chr7	116559160	116559161	ENSG00000105974.13:ENST00000341049.7:chr7:116559160:+	1314	+
chr7	116559181	116559182	ENSG00000105974.13:ENST00000341049.7:chr7:116559181:+	1314	+
chr7	116559210	116559211	ENSG00000105974.13:ENST00000341049.7:chr7:116559210:+	1314	+
chr7	116559224	116559225	ENSG00000105974.13:ENST00000341049.7:chr7:116559224:+	2314	+
chr7	116559226	116559227	ENSG00000105974.13:ENST00000341049.7:chr7:116559226:+	2314	+
chr7	116559234	116559235	ENSG00000105974.13:ENST00000341049.7:chr7:116559234:+	2314	+
chr7	116559259	116559260	ENSG00000105974.13:ENST00000341049.7:chr7:116559259:+	2314	+
chr7	134933027	134933028	ENSG00000122786.20:ENST00000393118.6:chr7:134933027:+	1,7	+
chr7	134933102	134933103	ENSG00000122786.20:ENST00000393118.6:chr7:134933102:+	1,7	+
chr7	134933188	134933189	ENSG00000122786.20:ENST00000393118.6:chr7:134933188:+	1,7	+
chr7	134958217	134958218	ENSG00000122786.20:ENST00000393118.6:chr7:134958217:+	1,3	+
chr7	134965381	134965382	ENSG00000122786.20:ENST00000393118.6:chr7:134965381:+	1,3	+
chr8	143581148	143581149	ENSG00000104529.18:ENST00000317198.10:chr8:143581148:-	1,8	-
chr8	144464573	144464574	ENSG00000187954.13:ENST00000306145.10:chr8:144464573:-	1,14	-
chr9	32987829	32987830	ENSG00000137074.20:ENST00000379819.6:chr9:32987829:-	1,2	-
chr9	32984851	32984852	ENSG00000137074.20:ENST00000379819.6:chr9:32984851:-	1,2	-
chr9	87727613	87727614	ENSG00000135047.16:ENST00000343150.10:chr9:87727613:+	1,72	+
chr9	87728064	87728065	ENSG00000135047.16:ENST00000343150.10:chr9:87728064:+	1,72	+
chr9	87728085	87728086	ENSG00000135047.16:ENST00000343150.10:chr9:87728085:+	1,72	+
chr9	87728120	87728121	ENSG00000135047.16:ENST00000343150.10:chr9:87728120:+	1,72	+
chr9	87728145	87728146	ENSG00000135047.16:ENST00000343150.10:chr9:87728145:+	1,72	+
chr9	87729672	87729673	ENSG00000135047.16:ENST00000343150.10:chr9:87729672:+	1,72	+
chr9	87730458	87730459	ENSG00000135047.16:ENST00000343150.10:chr9:87730458:+	1,72	+
chr9	87731091	87731092	ENSG00000135047.16:ENST00000343150.10:chr9:87731091:+	1,72	+
chr9	87731097	87731098	ENSG00000135047.16:ENST00000343150.10:chr9:87731097:+	1,72	+
chr9	125585635	125585636	ENSG00000119487.17:ENST00000373503.7:chr9:125585635:-	1,8	-
chr9	125438967	125438968	ENSG00000119487.17:ENST00000373503.7:chr9:125438967:-	1,8	-
chr9	129120539	129120540	ENSG00000119383.21:ENST00000348141.9:chr9:129120539:+	1,80	+
chr9	129120546	129120547	ENSG00000119383.21:ENST00000348141.9:chr9:129120546:+	1,80	+
chr9	129120556	129120557	ENSG00000119383.21:ENST00000348141.9:chr9:129120556:+	1,80	+
chr9	129120607	129120608	ENSG00000119383.21:ENST00000348141.9:chr9:129120607:+	1,80	+
chr9	129123062	129123063	ENSG00000119383.21:ENST00000348141.9:chr9:129123062:+	2,80	+
chr9	129123065	129123066	ENSG00000119383.21:ENST00000348141.9:chr9:129123065:+	1,80	+
chr9	129123125	129123126	ENSG00000119383.21:ENST00000348141.9:chr9:129123125:+	1,80	+
chr9	129129010	129129011	ENSG00000119383.21:ENST00000348141.9:chr9:129129010:+	1,80	+
chr9	129129082	129129083	ENSG00000119383.21:ENST00000348141.9:chr9:129129082:+	1,80	+
chr9	129131532	129131533	ENSG00000119383.21:ENST00000348141.9:chr9:129131532:+	1,80	+
chr9	129131543	129131544	ENSG00000119383.21:ENST00000348141.9:chr9:129131543:+	1,80	+
chr9	129131628	129131629	ENSG00000119383.21:ENST00000348141.9:chr9:129131628:+	1,80	+
chr9	129134806	129134807	ENSG00000119383.21:ENST00000348141.9:chr9:129134806:+	1,80	+
chr9	129134807	129134808	ENSG00000119383.21:ENST00000348141.9:chr9:129134807:+	1,80	+
chr9	129134815	129134816	ENSG00000119383.21:ENST00000348141.9:chr9:129134815:+	1,80	+
chr9	129134847	129134848	ENSG00000119383.21:ENST00000348141.9:chr9:129134847:+	1,80	+
chr9	129134876	129134877	ENSG00000119383.21:ENST00000348141.9:chr9:129134876:+	1,80	+
chr9	129136551	129136552	ENSG00000119383.21:ENST00000348141.9:chr9:129136551:+	1,80	+
chr9	129136583	129136584	ENSG00000119383.21:ENST00000348141.9:chr9:129136583:+	1,80	+
chr9	129137655	129137656	ENSG00000119383.21:ENST00000348141.9:chr9:129137655:+	1,80	+
chr9	129137676	129137677	ENSG00000119383.21:ENST00000348141.9:chr9:129137676:+	1,80	+
chr9	129137687	129137688	ENSG00000119383.21:ENST00000348141.9:chr9:129137687:+	1,80	+
chr9	129142488	129142489	ENSG00000119383.21:ENST00000348141.9:chr9:129142488:+	1,80	+
chr9	129147424	129147425	ENSG00000119383.21:ENST00000348141.9:chr9:129147424:+	2,80	+
chr9	129147451	129147452	ENSG00000119383.21:ENST00000348141.9:chr9:129147451:+	1,80	+
chr10	43386662	43386663	ENSG00000169813.17:ENST00000357065.8:chr10:43386662:-	1,48	-
chr10	43387289	43387290	ENSG00000169813.17:ENST00000357065.8:chr10:43387289:-	1,48	-
chr10	43387302	43387303	ENSG00000169813.17:ENST00000357065.8:chr10:43387302:-	1,48	-
chr10	43387446	43387447	ENSG00000169813.17:ENST00000357065.8:chr10:43387446:-	1,48	-
chr10	43387532	43387533	ENSG00000169813.17:ENST00000357065.8:chr10:43387532:-	1,48	-
chr10	43387638	43387639	ENSG00000169813.17:ENST00000357065.8:chr10:43387638:-	1,48	-
chr10	43387782	43387783	ENSG00000169813.17:ENST00000357065.8:chr10:43387782:-	1,48	-
chr10	43387797	43387798	ENSG00000169813.17:ENST00000357065.8:chr10:43387797:-	1,48	-
chr10	100987168	100987169	ENSG00000055950.16:ENST00000318325.6:chr10:100987168:-	1,3	-
chr11	64770305	64770306	ENSG00000168066.21:ENST00000377394.7:chr11:64770305:-	1,41	-
chr11	64769446	64769447	ENSG00000168066.21:ENST00000377394.7:chr11:64769446:-	1,41	-
chr11	64769602	64769603	ENSG00000168066.21:ENST00000377394.7:chr11:64769602:-	1,41	-
chr11	64769230	64769231	ENSG00000168066.21:ENST00000377394.7:chr11:64769230:-	1,41	-
chr11	64768175	64768176	ENSG00000168066.21:ENST00000377394.7:chr11:64768175:-	1,41	-
chr11	64767727	64767728	ENSG00000168066.21:ENST00000377394.7:chr11:64767727:-	1,41	-
chr11	64766925	64766926	ENSG00000168066.21:ENST00000377394.7:chr11:64766925:-	1,41	-
chr11	64766977	64766978	ENSG00000168066.21:ENST00000377394.7:chr11:64766977:-	3,41	-
chr11	65712411	65712412	ENSG00000172977.13:ENST00000377046.7:chr11:65712411:+	1,79	+
chr11	65713019	65713020	ENSG00000172977.13:ENST00000377046.7:chr11:65713019:+	1,79	+
chr11	65713454	65713455	ENSG00000172977.13:ENST00000377046.7:chr11:65713454:+	2,79	+
chr11	65713490	65713491	ENSG00000172977.13:ENST00000377046.7:chr11:65713490:+	1,79	+
chr11	65714505	65714506	ENSG00000172977.13:ENST00000377046.7:chr11:65714505:+	1,79	+
chr11	65714568	65714569	ENSG00000172977.13:ENST00000377046.7:chr11:65714568:+	1,79	+
chr11	65714595	65714596	ENSG00000172977.13:ENST00000377046.7:chr11:65714595:+	1,79	+
chr11	65714643	65714644	ENSG00000172977.13:ENST00000377046.7:chr11:65714643:+	1,79	+
chr11	65714697	65714698	ENSG00000172977.13:ENST00000377046.7:chr11:65714697:+	1,79	+
chr11	65714821	65714822	ENSG00000172977.13:ENST00000377046.7:chr11:65714821:+	2,79	+
chr11	65714876	65714877	ENSG00000172977.13:ENST00000377046.7:chr11:65714876:+	1,79	+
chr11	65716752	65716753	ENSG00000172977.13:ENST00000377046.7:chr11:65716752:+	1,79	+
chr11	65718599	65718600	ENSG00000172977.13:ENST00000377046.7:chr11:65718599:+	1,79	+
chr11	65718636	65718637	ENSG00000172977.13:ENST00000377046.7:chr11:65718636:+	1,79	+
chr11	65718889	65718890	ENSG00000172977.13:ENST00000377046.7:chr11:65718889:+	1,79	+
chr11	65718911	65718912	ENSG00000172977.13:ENST00000377046.7:chr11:65718911:+	1,79	+
chr11	65719068	65719069	ENSG00000172977.13:ENST00000377046.7:chr11:65719068:+	1,79	+
chr11	65719150	65719151	ENSG00000172977.13:ENST00000377046.7:chr11:65719150:+	1,79	+
chr11	74037570	74037571	ENSG00000168014.18:ENST00000334126.12:chr11:74037570:-	1,4	-
chr11	118532292	118532293	ENSG00000149582.16:ENST00000313236.10:chr11:118532292:+	1,27	+
chr11	118532376	118532377	ENSG00000149582.16:ENST00000313236.10:chr11:118532376:+	1,28	+
chr11	118533091	118533092	ENSG00000149582.16:ENST00000313236.10:chr11:118533091:+	1,28	+
chr11	118533109	118533110	ENSG00000149582.16:ENST00000313236.10:chr11:118533109:+	1,28	+
chr11	118533172	118533173	ENSG00000149582.16:ENST00000313236.10:chr11:118533172:+	1,28	+
chr11	118534031	118534032	ENSG00000149582.16:ENST00000313236.10:chr11:118534031:+	1,29	+
chr11	118534094	118534095	ENSG00000149582.16:ENST00000313236.10:chr11:118534094:+	1,29	+
chr11	119101547	119101548	ENSG00000172269.20:ENST00000392834.7:chr11:119101547:-	1,5	-
chr12	6536509	6536510	ENSG00000111640.15:ENST00000229239.10:chr12:6536509:+	516922	+
chr12	6536512	6536513	ENSG00000111640.15:ENST00000229239.10:chr12:6536512:+	216925	+
chr12	6536520	6536521	ENSG00000111640.15:ENST00000229239.10:chr12:6536520:+	116934	+
chr12	6536525	6536526	ENSG00000111640.15:ENST00000229239.10:chr12:6536525:+	316936	+
chr12	6536559	6536560	ENSG00000111640.15:ENST00000229239.10:chr12:6536559:+	316947	+
chr12	6536569	6536570	ENSG00000111640.15:ENST00000229239.10:chr12:6536569:+	516949	+
chr12	6536570	6536571	ENSG00000111640.15:ENST00000229239.10:chr12:6536570:+	216950	+
[truncated: 117,549 more rows]

## Sheet: NT_rep1
chr1	156115069	156115070	ENSG00000160789.24:ENST00000368301.6:chr1:156115069:+	1,4	+
chr2	197498782	197498783	ENSG00000144381.18:ENST00000345042.6:chr2:197498782:-	1,95	-
chr2	197498787	197498788	ENSG00000144381.18:ENST00000345042.6:chr2:197498787:-	1,95	-
chr2	197498796	197498797	ENSG00000144381.18:ENST00000345042.6:chr2:197498796:-	1,95	-
chr2	197498844	197498845	ENSG00000144381.18:ENST00000345042.6:chr2:197498844:-	1,95	-
chr2	197497228	197497229	ENSG00000144381.18:ENST00000345042.6:chr2:197497228:-	1,95	-
chr2	197497384	197497385	ENSG00000144381.18:ENST00000345042.6:chr2:197497384:-	1,95	-
chr2	197493391	197493392	ENSG00000144381.18:ENST00000345042.6:chr2:197493391:-	1,95	-
chr2	197493459	197493460	ENSG00000144381.18:ENST00000345042.6:chr2:197493459:-	1,95	-
chr2	197490265	197490266	ENSG00000144381.18:ENST00000345042.6:chr2:197490265:-	1,95	-
chr2	197489094	197489095	ENSG00000144381.18:ENST00000345042.6:chr2:197489094:-	1,95	-
chr2	197488348	197488349	ENSG00000144381.18:ENST00000345042.6:chr2:197488348:-	1,95	-
chr2	197488423	197488424	ENSG00000144381.18:ENST00000345042.6:chr2:197488423:-	1,95	-
chr2	197488426	197488427	ENSG00000144381.18:ENST00000345042.6:chr2:197488426:-	1,95	-
chr3	9745008	9745009	ENSG00000156983.17:ENST00000433861.6:chr3:9745008:+	1,1	+
chr3	58138521	58138522	ENSG00000136068.16:ENST00000358537.7:chr3:58138521:+	1,14	+
chr3	58170651	58170652	ENSG00000136068.16:ENST00000358537.7:chr3:58170651:+	1,14	+
chr3	184321890	184321891	ENSG00000114867.22:ENST00000435046.7:chr3:184321890:+	1,1	+
chr4	82867288	82867289	ENSG00000138674.17:ENST00000508502.5:chr4:82867288:-	1,6	-
chr4	82853606	82853607	ENSG00000138674.17:ENST00000508502.5:chr4:82853606:-	1,6	-
chr4	82844432	82844433	ENSG00000138674.17:ENST00000508502.5:chr4:82844432:-	1,6	-
chr4	82842285	82842286	ENSG00000138674.17:ENST00000508502.5:chr4:82842285:-	1,6	-
chr4	82827617	82827618	ENSG00000138674.17:ENST00000508502.5:chr4:82827617:-	1,6	-
chr5	140436232	140436233	ENSG00000131503.21:ENST00000616482.4:chr5:140436232:+	1,1	+
chr5	140438522	140438523	ENSG00000131503.21:ENST00000616482.4:chr5:140438522:+	1,1	+
chr5	150367886	150367887	ENSG00000070814.22:ENST00000377797.7:chr5:150367886:+	1,16	+
chr5	150368815	150368816	ENSG00000070814.22:ENST00000377797.7:chr5:150368815:+	1,16	+
chr5	150368874	150368875	ENSG00000070814.22:ENST00000377797.7:chr5:150368874:+	1,16	+
chr5	150392725	150392726	ENSG00000070814.22:ENST00000377797.7:chr5:150392725:+	1,16	+
chr5	150392731	150392732	ENSG00000070814.22:ENST00000377797.7:chr5:150392731:+	1,16	+
chr5	150393448	150393449	ENSG00000070814.22:ENST00000377797.7:chr5:150393448:+	1,16	+
chr5	150393471	150393472	ENSG00000070814.22:ENST00000377797.7:chr5:150393471:+	1,16	+
chr5	150396384	150396385	ENSG00000070814.22:ENST00000377797.7:chr5:150396384:+	1,16	+
chr6	85641353	85641354	ENSG00000135316.19:ENST00000369622.8:chr6:85641353:-	1,14	-
chr6	85636997	85636998	ENSG00000135316.19:ENST00000369622.8:chr6:85636997:-	1,14	-
chr6	85637040	85637041	ENSG00000135316.19:ENST00000369622.8:chr6:85637040:-	1,14	-
chr6	85624064	85624065	ENSG00000135316.19:ENST00000369622.8:chr6:85624064:-	1,14	-
chr6	85614867	85614868	ENSG00000135316.19:ENST00000369622.8:chr6:85614867:-	1,14	-
chr9	92285745	92285746	ENSG00000196305.19:ENST00000683469.1:chr9:92285745:-	1,5	-
chr9	92250811	92250812	ENSG00000196305.19:ENST00000683469.1:chr9:92250811:-	1,5	-
chr9	92247528	92247529	ENSG00000196305.19:ENST00000683469.1:chr9:92247528:-	1,5	-
chr9	92242294	92242295	ENSG00000196305.19:ENST00000683469.1:chr9:92242294:-	1,5	-
chr9	92242313	92242314	ENSG00000196305.19:ENST00000683469.1:chr9:92242313:-	1,5	-
chr9	92229029	92229030	ENSG00000196305.19:ENST00000683469.1:chr9:92229029:-	1,5	-
chr9	137088160	137088161	ENSG00000177239.16:ENST00000683135.1:chr9:137088160:+	1,3	+
chr10	133302857	133302858	ENSG00000130640.15:ENST00000683612.1:chr10:133302857:-	1,6	-
chr10	133302895	133302896	ENSG00000130640.15:ENST00000683612.1:chr10:133302895:-	1,6	-
chr10	133300026	133300027	ENSG00000130640.15:ENST00000683612.1:chr10:133300026:-	1,6	-
chr10	133300032	133300033	ENSG00000130640.15:ENST00000683612.1:chr10:133300032:-	2,6	-
chr10	133292637	133292638	ENSG00000130640.15:ENST00000683612.1:chr10:133292637:-	1,6	-
chr10	133283986	133283987	ENSG00000130640.15:ENST00000683612.1:chr10:133283986:-	1,6	-
chr10	133281304	133281305	ENSG00000130640.15:ENST00000683612.1:chr10:133281304:-	1,6	-
chr10	133281367	133281368	ENSG00000130640.15:ENST00000683612.1:chr10:133281367:-	1,6	-
chr12	6597954	6597955	ENSG00000111642.16:ENST00000643815.1:chr12:6597954:-	1,1	-
chr12	6583099	6583100	ENSG00000111642.16:ENST00000643815.1:chr12:6583099:-	1,3	-
chr12	103931523	103931524	ENSG00000166598.16:ENST00000681941.1:chr12:103931523:+	1156	+
chr14	103405123	103405124	ENSG00000075413.19:ENST00000429436.7:chr14:103405123:+	1,44	+
chr14	103428434	103428435	ENSG00000075413.19:ENST00000429436.7:chr14:103428434:+	1,44	+
chr14	103466023	103466024	ENSG00000075413.19:ENST00000429436.7:chr14:103466023:+	1,46	+
chr14	103491950	103491951	ENSG00000075413.19:ENST00000429436.7:chr14:103491950:+	1,49	+
chr14	103500179	103500180	ENSG00000075413.19:ENST00000429436.7:chr14:103500179:+	1,49	+
chr14	103502884	103502885	ENSG00000075413.19:ENST00000429436.7:chr14:103502884:+	1,49	+
chr15	60382354	60382355	ENSG00000182718.18:ENST00000421017.6:chr15:60382354:-	1661	-
chr15	60364506	60364507	ENSG00000182718.18:ENST00000421017.6:chr15:60364506:-	1662	-
chr15	60352406	60352407	ENSG00000182718.18:ENST00000421017.6:chr15:60352406:-	2662	-
chr15	60351747	60351748	ENSG00000182718.18:ENST00000421017.6:chr15:60351747:-	1661	-
chr17	42337784	42337785	ENSG00000168610.16:ENST00000677479.1:chr17:42337784:-	1,2	-
chr17	42333704	42333705	ENSG00000168610.16:ENST00000677479.1:chr17:42333704:-	1,2	-
chr17	42323309	42323310	ENSG00000168610.16:ENST00000677479.1:chr17:42323309:-	1,2	-
chr17	81860425	81860426	ENSG00000185624.16:ENST00000680593.1:chr17:81860425:-	1,52	-
chr17	81860455	81860456	ENSG00000185624.16:ENST00000680593.1:chr17:81860455:-	1,52	-
chr17	81855531	81855532	ENSG00000185624.16:ENST00000680593.1:chr17:81855531:-	1,57	-
chr17	81855238	81855239	ENSG00000185624.16:ENST00000680593.1:chr17:81855238:-	1,57	-
chr17	81845632	81845633	ENSG00000185624.16:ENST00000680593.1:chr17:81845632:-	1,60	-
chr17	81845639	81845640	ENSG00000185624.16:ENST00000680593.1:chr17:81845639:-	1,60	-
chr19	40692181	40692182	ENSG00000123815.13:ENST00000601967.6:chr19:40692181:-	1,12	-
chr20	31721657	31721658	ENSG00000171552.14:ENST00000307677.5:chr20:31721657:-	1311	-
chr20	31721810	31721811	ENSG00000171552.14:ENST00000307677.5:chr20:31721810:-	1311	-
chr20	31721865	31721866	ENSG00000171552.14:ENST00000307677.5:chr20:31721865:-	1311	-
chr20	31721874	31721875	ENSG00000171552.14:ENST00000307677.5:chr20:31721874:-	1311	-
chr20	31722005	31722006	ENSG00000171552.14:ENST00000307677.5:chr20:31722005:-	1311	-
chr20	31722012	31722013	ENSG00000171552.14:ENST00000307677.5:chr20:31722012:-	1311	-
chr20	31722014	31722015	ENSG00000171552.14:ENST00000307677.5:chr20:31722014:-	1311	-
chr20	31722027	31722028	ENSG00000171552.14:ENST00000307677.5:chr20:31722027:-	2311	-
chr20	31722039	31722040	ENSG00000171552.14:ENST00000307677.5:chr20:31722039:-	1311	-
chr20	31722090	31722091	ENSG00000171552.14:ENST00000307677.5:chr20:31722090:-	1311	-
chr20	31665988	31665989	ENSG00000171552.14:ENST00000307677.5:chr20:31665988:-	1310	-
chr20	31665994	31665995	ENSG00000171552.14:ENST00000307677.5:chr20:31665994:-	1311	-
chr20	31666070	31666071	ENSG00000171552.14:ENST00000307677.5:chr20:31666070:-	1311	-
chr20	31666081	31666082	ENSG00000171552.14:ENST00000307677.5:chr20:31666081:-	2311	-
chr20	35740836	35740837	ENSG00000131051.24:ENST00000361162.10:chr20:35740836:-	1298	-
chr20	35738977	35738978	ENSG00000131051.24:ENST00000361162.10:chr20:35738977:-	1298	-
chr20	35738990	35738991	ENSG00000131051.24:ENST00000361162.10:chr20:35738990:-	1298	-
chr20	35731995	35731996	ENSG00000131051.24:ENST00000361162.10:chr20:35731995:-	3296	-
chr20	35729334	35729335	ENSG00000131051.24:ENST00000361162.10:chr20:35729334:-	1296	-
chr20	35729364	35729365	ENSG00000131051.24:ENST00000361162.10:chr20:35729364:-	1282	-
chr20	35725134	35725135	ENSG00000131051.24:ENST00000361162.10:chr20:35725134:-	2296	-
chr20	35724580	35724581	ENSG00000131051.24:ENST00000361162.10:chr20:35724580:-	1296	-
chr20	35724682	35724683	ENSG00000131051.24:ENST00000361162.10:chr20:35724682:-	3296	-
chr20	35721779	35721780	ENSG00000131051.24:ENST00000361162.10:chr20:35721779:-	1296	-
chr20	35721844	35721845	ENSG00000131051.24:ENST00000361162.10:chr20:35721844:-	2296	-
chr20	35714193	35714194	ENSG00000131051.24:ENST00000361162.10:chr20:35714193:-	1296	-
chr20	35714208	35714209	ENSG00000131051.24:ENST00000361162.10:chr20:35714208:-	1296	-
chr20	35714222	35714223	ENSG00000131051.24:ENST00000361162.10:chr20:35714222:-	1296	-
chr20	35714250	35714251	ENSG00000131051.24:ENST00000361162.10:chr20:35714250:-	1296	-
chr20	35714295	35714296	ENSG00000131051.24:ENST00000361162.10:chr20:35714295:-	1296	-
chr20	35714349	35714350	ENSG00000131051.24:ENST00000361162.10:chr20:35714349:-	1296	-
chr20	35714380	35714381	ENSG00000131051.24:ENST00000361162.10:chr20:35714380:-	1296	-
chr20	35713041	35713042	ENSG00000131051.24:ENST00000361162.10:chr20:35713041:-	1296	-
chr20	35709241	35709242	ENSG00000131051.24:ENST00000361162.10:chr20:35709241:-	2296	-
chr20	35707127	35707128	ENSG00000131051.24:ENST00000361162.10:chr20:35707127:-	2296	-
chr20	35707158	35707159	ENSG00000131051.24:ENST00000361162.10:chr20:35707158:-	1296	-
chr20	35705306	35705307	ENSG00000131051.24:ENST00000361162.10:chr20:35705306:-	1296	-
chr20	35704514	35704515	ENSG00000131051.24:ENST00000361162.10:chr20:35704514:-	1296	-
chr20	35704537	35704538	ENSG00000131051.24:ENST00000361162.10:chr20:35704537:-	2296	-
chr20	35704540	35704541	ENSG00000131051.24:ENST00000361162.10:chr20:35704540:-	1296	-
chr20	35704544	35704545	ENSG00000131051.24:ENST00000361162.10:chr20:35704544:-	1296	-
chr20	35704554	35704555	ENSG00000131051.24:ENST00000361162.10:chr20:35704554:-	2296	-
chr3	51391546	51391547	ENSG00000259956.2:ENST00000563281.2:chr3:51391546:+	1,69	+
chr3	51391738	51391739	ENSG00000259956.2:ENST00000563281.2:chr3:51391738:+	1,78	+
chr3	51392190	51392191	ENSG00000259956.2:ENST00000563281.2:chr3:51392190:+	1,91	+
chr3	51392335	51392336	ENSG00000259956.2:ENST00000563281.2:chr3:51392335:+	1,94	+
chr3	51392687	51392688	ENSG00000259956.2:ENST00000563281.2:chr3:51392687:+	1102	+
chr3	51393215	51393216	ENSG00000259956.2:ENST00000563281.2:chr3:51393215:+	1106	+
chr3	51394013	51394014	ENSG00000259956.2:ENST00000563281.2:chr3:51394013:+	1105	+
chr14	24117324	24117325	ENSG00000100897.18:ENST00000559115.5:chr14:24117324:+	2,14	+
chr14	24118393	24118394	ENSG00000100897.18:ENST00000559115.5:chr14:24118393:+	1,14	+
chr14	24118489	24118490	ENSG00000100897.18:ENST00000559115.5:chr14:24118489:+	1,14	+
chr14	24119889	24119890	ENSG00000100897.18:ENST00000559115.5:chr14:24119889:+	1,14	+
chr14	24120956	24120957	ENSG00000100897.18:ENST00000559115.5:chr14:24120956:+	1,14	+
chr14	24121469	24121470	ENSG00000100897.18:ENST00000559115.5:chr14:24121469:+	1,14	+
chr14	24123185	24123186	ENSG00000100897.18:ENST00000559115.5:chr14:24123185:+	1,14	+
chr14	24123286	24123287	ENSG00000100897.18:ENST00000559115.5:chr14:24123286:+	1,14	+
chr14	24123295	24123296	ENSG00000100897.18:ENST00000559115.5:chr14:24123295:+	1,14	+
chr14	102355790	102355791	ENSG00000100865.15:ENST00000559514.5:chr14:102355790:-	1,13	-
chr15	40335426	40335427	ENSG00000188549.12:ENST00000559313.5:chr15:40335426:-	1,1	-
chr15	40844754	40844755	ENSG00000166145.15:ENST00000562057.6:chr15:40844754:+	1,2	+
chr15	42547338	42547339	ENSG00000180979.10:ENST00000563454.5:chr15:42547338:-	1,1	-
chr15	49035454	49035455	ENSG00000138593.9:ENST00000559471.6:chr15:49035454:-	1,7	-
chr15	49643570	49643571	ENSG00000104047.15:ENST00000558653.5:chr15:49643570:+	1,2	+
chr15	64096033	64096034	ENSG00000028528.15:ENST00000559844.6:chr15:64096033:+	1264	+
chr15	64096086	64096087	ENSG00000028528.15:ENST00000559844.6:chr15:64096086:+	1265	+
chr15	64096132	64096133	ENSG00000028528.15:ENST00000559844.6:chr15:64096132:+	2272	+
chr15	64096134	64096135	ENSG00000028528.15:ENST00000559844.6:chr15:64096134:+	1272	+
chr15	64096147	64096148	ENSG00000028528.15:ENST00000559844.6:chr15:64096147:+	2272	+
chr15	64096161	64096162	ENSG00000028528.15:ENST00000559844.6:chr15:64096161:+	2272	+
chr15	64112587	64112588	ENSG00000028528.15:ENST00000559844.6:chr15:64112587:+	2271	+
chr15	64112597	64112598	ENSG00000028528.15:ENST00000559844.6:chr15:64112597:+	3272	+
chr15	64112600	64112601	ENSG00000028528.15:ENST00000559844.6:chr15:64112600:+	1272	+
chr15	64112608	64112609	ENSG00000028528.15:ENST00000559844.6:chr15:64112608:+	1272	+
chr15	64112658	64112659	ENSG00000028528.15:ENST00000559844.6:chr15:64112658:+	1274	+
chr15	64112681	64112682	ENSG00000028528.15:ENST00000559844.6:chr15:64112681:+	1274	+
chr15	64118173	64118174	ENSG00000028528.15:ENST00000559844.6:chr15:64118173:+	1274	+
chr15	64118179	64118180	ENSG00000028528.15:ENST00000559844.6:chr15:64118179:+	1274	+
chr15	64118181	64118182	ENSG00000028528.15:ENST00000559844.6:chr15:64118181:+	2274	+
chr15	64118183	64118184	ENSG00000028528.15:ENST00000559844.6:chr15:64118183:+	1274	+
chr15	64118824	64118825	ENSG00000028528.15:ENST00000559844.6:chr15:64118824:+	4274	+
chr15	64118841	64118842	ENSG00000028528.15:ENST00000559844.6:chr15:64118841:+	1274	+
chr15	64123530	64123531	ENSG00000028528.15:ENST00000559844.6:chr15:64123530:+	4274	+
chr15	64123543	64123544	ENSG00000028528.15:ENST00000559844.6:chr15:64123543:+	1274	+
chr15	64126095	64126096	ENSG00000028528.15:ENST00000559844.6:chr15:64126095:+	2274	+
chr15	64127206	64127207	ENSG00000028528.15:ENST00000559844.6:chr15:64127206:+	1273	+
chr15	64127212	64127213	ENSG00000028528.15:ENST00000559844.6:chr15:64127212:+	1274	+
chr15	64127223	64127224	ENSG00000028528.15:ENST00000559844.6:chr15:64127223:+	1274	+
chr15	64127232	64127233	ENSG00000028528.15:ENST00000559844.6:chr15:64127232:+	1274	+
chr15	64127767	64127768	ENSG00000028528.15:ENST00000559844.6:chr15:64127767:+	1274	+
chr15	64127778	64127779	ENSG00000028528.15:ENST00000559844.6:chr15:64127778:+	1274	+
chr15	64129957	64129958	ENSG00000028528.15:ENST00000559844.6:chr15:64129957:+	1274	+
chr15	64129971	64129972	ENSG00000028528.15:ENST00000559844.6:chr15:64129971:+	1274	+
chr15	64129982	64129983	ENSG00000028528.15:ENST00000559844.6:chr15:64129982:+	1274	+
chr15	64130003	64130004	ENSG00000028528.15:ENST00000559844.6:chr15:64130003:+	1274	+
chr15	64130025	64130026	ENSG00000028528.15:ENST00000559844.6:chr15:64130025:+	2274	+
chr15	64130275	64130276	ENSG00000028528.15:ENST00000559844.6:chr15:64130275:+	1274	+
chr15	64130281	64130282	ENSG00000028528.15:ENST00000559844.6:chr15:64130281:+	5274	+
chr15	64130310	64130311	ENSG00000028528.15:ENST00000559844.6:chr15:64130310:+	1274	+
chr15	64131699	64131700	ENSG00000028528.15:ENST00000559844.6:chr15:64131699:+	1274	+
chr15	64131750	64131751	ENSG00000028528.15:ENST00000559844.6:chr15:64131750:+	1274	+
chr15	64131828	64131829	ENSG00000028528.15:ENST00000559844.6:chr15:64131828:+	2274	+
chr15	64131834	64131835	ENSG00000028528.15:ENST00000559844.6:chr15:64131834:+	3274	+
chr15	64131864	64131865	ENSG00000028528.15:ENST00000559844.6:chr15:64131864:+	2274	+
chr15	64134715	64134716	ENSG00000028528.15:ENST00000559844.6:chr15:64134715:+	1274	+
chr15	64134753	64134754	ENSG00000028528.15:ENST00000559844.6:chr15:64134753:+	1274	+
chr15	64136361	64136362	ENSG00000028528.15:ENST00000559844.6:chr15:64136361:+	1273	+
chr15	64136401	64136402	ENSG00000028528.15:ENST00000559844.6:chr15:64136401:+	1274	+
chr15	64136877	64136878	ENSG00000028528.15:ENST00000559844.6:chr15:64136877:+	2274	+
chr15	64136880	64136881	ENSG00000028528.15:ENST00000559844.6:chr15:64136880:+	1274	+
chr15	64136886	64136887	ENSG00000028528.15:ENST00000559844.6:chr15:64136886:+	2273	+
chr15	64136919	64136920	ENSG00000028528.15:ENST00000559844.6:chr15:64136919:+	2274	+
chr15	64137590	64137591	ENSG00000028528.15:ENST00000559844.6:chr15:64137590:+	1274	+
chr15	64137613	64137614	ENSG00000028528.15:ENST00000559844.6:chr15:64137613:+	2274	+
chr15	76841742	76841743	ENSG00000140386.13:ENST00000563290.6:chr15:76841742:-	1,10	-
chr15	76795320	76795321	ENSG00000140386.13:ENST00000563290.6:chr15:76795320:-	1,10	-
chr15	84801926	84801927	ENSG00000166716.10:ENST00000560079.7:chr15:84801926:+	1,2	+
chr15	85579934	85579935	ENSG00000170776.22:ENST00000559362.5:chr15:85579934:+	1,2	+
chr15	85580482	85580483	ENSG00000170776.22:ENST00000559362.5:chr15:85580482:+	1,2	+
chr16	18789001	18789002	ENSG00000134419.15:ENST00000563390.5:chr16:18789001:-	1,64	-
chr16	18789011	18789012	ENSG00000134419.15:ENST00000563390.5:chr16:18789011:-	1,64	-
chr16	18789037	18789038	ENSG00000134419.15:ENST00000563390.5:chr16:18789037:-	1,64	-
chr16	18789080	18789081	ENSG00000134419.15:ENST00000563390.5:chr16:18789080:-	1,64	-
chr16	18784789	18784790	ENSG00000134419.15:ENST00000563390.5:chr16:18784789:-	1,64	-
chr16	18784811	18784812	ENSG00000134419.15:ENST00000563390.5:chr16:18784811:-	1,64	-
chr16	29996823	29996824	ENSG00000169592.15:ENST00000563197.6:chr16:29996823:+	1,31	+
chr16	30000814	30000815	ENSG00000169592.15:ENST00000563197.6:chr16:30000814:+	1,31	+
chr16	30000820	30000821	ENSG00000169592.15:ENST00000563197.6:chr16:30000820:+	1,31	+
chr16	30001444	30001445	ENSG00000169592.15:ENST00000563197.6:chr16:30001444:+	1,31	+
chr16	30001524	30001525	ENSG00000169592.15:ENST00000563197.6:chr16:30001524:+	1,31	+
chr16	30001526	30001527	ENSG00000169592.15:ENST00000563197.6:chr16:30001526:+	1,31	+
chr16	30005353	30005354	ENSG00000169592.15:ENST00000563197.6:chr16:30005353:+	1,31	+
chr16	89198474	89198475	ENSG00000259803.8:ENST00000562855.7:chr16:89198474:-	1,1	-
chr16	89198132	89198133	ENSG00000259803.8:ENST00000562855.7:chr16:89198132:-	1,1	-
chr19	11102712	11102713	ENSG00000130164.14:ENST00000558518.6:chr19:11102712:+	1165	+
chr19	11105307	11105308	ENSG00000130164.14:ENST00000558518.6:chr19:11105307:+	1165	+
chr19	11105318	11105319	ENSG00000130164.14:ENST00000558518.6:chr19:11105318:+	1165	+
chr19	11105322	11105323	ENSG00000130164.14:ENST00000558518.6:chr19:11105322:+	1165	+
chr19	11105335	11105336	ENSG00000130164.14:ENST00000558518.6:chr19:11105335:+	1165	+
chr19	11105388	11105389	ENSG00000130164.14:ENST00000558518.6:chr19:11105388:+	1163	+
chr19	11105395	11105396	ENSG00000130164.14:ENST00000558518.6:chr19:11105395:+	1165	+
chr19	11105454	11105455	ENSG00000130164.14:ENST00000558518.6:chr19:11105454:+	1165	+
chr19	11105475	11105476	ENSG00000130164.14:ENST00000558518.6:chr19:11105475:+	1165	+
chr19	11106658	11106659	ENSG00000130164.14:ENST00000558518.6:chr19:11106658:+	1165	+
chr19	11107408	11107409	ENSG00000130164.14:ENST00000558518.6:chr19:11107408:+	1163	+
chr19	11113546	11113547	ENSG00000130164.14:ENST00000558518.6:chr19:11113546:+	1165	+
chr19	11116183	11116184	ENSG00000130164.14:ENST00000558518.6:chr19:11116183:+	2165	+
chr19	11116899	11116900	ENSG00000130164.14:ENST00000558518.6:chr19:11116899:+	1165	+
chr19	11116991	11116992	ENSG00000130164.14:ENST00000558518.6:chr19:11116991:+	1165	+
chr19	11120184	11120185	ENSG00000130164.14:ENST00000558518.6:chr19:11120184:+	2165	+
chr19	11120213	11120214	ENSG00000130164.14:ENST00000558518.6:chr19:11120213:+	1165	+
chr19	11123257	11123258	ENSG00000130164.14:ENST00000558518.6:chr19:11123257:+	1165	+
chr19	11123276	11123277	ENSG00000130164.14:ENST00000558518.6:chr19:11123276:+	1165	+
chr19	11128083	11128084	ENSG00000130164.14:ENST00000558518.6:chr19:11128083:+	1165	+
chr1	12579310	12579311	ENSG00000162496.9:ENST00000616661.5:chr1:12579310:-	1,9	-
chr1	12568376	12568377	ENSG00000162496.9:ENST00000616661.5:chr1:12568376:-	1,9	-
chr1	46303247	46303248	ENSG00000132128.17:ENST00000617190.5:chr1:46303247:-	1,60	-
chr1	46303300	46303301	ENSG00000132128.17:ENST00000617190.5:chr1:46303300:-	1,60	-
chr1	46298297	46298298	ENSG00000132128.17:ENST00000617190.5:chr1:46298297:-	1,60	-
chr1	46298329	46298330	ENSG00000132128.17:ENST00000617190.5:chr1:46298329:-	1,60	-
chr1	46298337	46298338	ENSG00000132128.17:ENST00000617190.5:chr1:46298337:-	2,60	-
chr1	46298352	46298353	ENSG00000132128.17:ENST00000617190.5:chr1:46298352:-	2,60	-
chr1	46297603	46297604	ENSG00000132128.17:ENST00000617190.5:chr1:46297603:-	1,60	-
chr1	46285418	46285419	ENSG00000132128.17:ENST00000617190.5:chr1:46285418:-	1,62	-
chr1	46285795	46285796	ENSG00000132128.17:ENST00000617190.5:chr1:46285795:-	1,60	-
chr1	46285802	46285803	ENSG00000132128.17:ENST00000617190.5:chr1:46285802:-	1,60	-
chr1	46285927	46285928	ENSG00000132128.17:ENST00000617190.5:chr1:46285927:-	1,60	-
chr1	46286045	46286046	ENSG00000132128.17:ENST00000617190.5:chr1:46286045:-	1,60	-
chr1	46286157	46286158	ENSG00000132128.17:ENST00000617190.5:chr1:46286157:-	1,60	-
chr1	46286216	46286217	ENSG00000132128.17:ENST00000617190.5:chr1:46286216:-	1,60	-
chr1	46286304	46286305	ENSG00000132128.17:ENST00000617190.5:chr1:46286304:-	1,60	-
chr1	46286418	46286419	ENSG00000132128.17:ENST00000617190.5:chr1:46286418:-	1,60	-
chr1	46281283	46281284	ENSG00000132128.17:ENST00000617190.5:chr1:46281283:-	1,62	-
chr1	46281287	46281288	ENSG00000132128.17:ENST00000617190.5:chr1:46281287:-	1,62	-
chr1	46280435	46280436	ENSG00000132128.17:ENST00000617190.5:chr1:46280435:-	1,62	-
chr1	46280219	46280220	ENSG00000132128.17:ENST00000617190.5:chr1:46280219:-	1,62	-
chr1	46280266	46280267	ENSG00000132128.17:ENST00000617190.5:chr1:46280266:-	1,62	-
chr1	46279498	46279499	ENSG00000132128.17:ENST00000617190.5:chr1:46279498:-	1,62	-
chr1	46279058	46279059	ENSG00000132128.17:ENST00000617190.5:chr1:46279058:-	1,62	-
chr1	93897887	93897888	ENSG00000023909.10:ENST00000615724.1:chr1:93897887:-	1,14	-
chr1	93894630	93894631	ENSG00000023909.10:ENST00000615724.1:chr1:93894630:-	1,14	-
chr1	93889019	93889020	ENSG00000023909.10:ENST00000615724.1:chr1:93889019:-	1,31	-
chr1	149024631	149024632	ENSG00000178104.19:ENST00000618462.4:chr1:149024631:+	1,1	+
chr1	149029914	149029915	ENSG00000178104.19:ENST00000618462.4:chr1:149029914:+	1,1	+
chr1	149077947	149077948	ENSG00000269713.7:ENST00000615421.4:chr1:149077947:-	1,1	-
chr1	149073819	149073820	ENSG00000269713.7:ENST00000615421.4:chr1:149073819:-	1,1	-
chr2	55564348	55564349	ENSG00000275052.5:ENST00000616288.4:chr2:55564348:-	1,5	-
chr2	99337566	99337567	ENSG00000158417.11:ENST00000617677.1:chr2:99337566:+	1,11	+
chr2	99364351	99364352	ENSG00000158417.11:ENST00000617677.1:chr2:99364351:+	1,5	+
chr2	99368514	99368515	ENSG00000158417.11:ENST00000617677.1:chr2:99368514:+	1,5	+
chr3	195543001	195543002	ENSG00000184203.8:ENST00000618156.5:chr3:195543001:-	1108	-
chr3	195529798	195529799	ENSG00000184203.8:ENST00000618156.5:chr3:195529798:-	1119	-
chr3	195529854	195529855	ENSG00000184203.8:ENST00000618156.5:chr3:195529854:-	1119	-
chr3	195524832	195524833	ENSG00000184203.8:ENST00000618156.5:chr3:195524832:-	2120	-
chr3	195524862	195524863	ENSG00000184203.8:ENST00000618156.5:chr3:195524862:-	1120	-
chr3	195519144	195519145	ENSG00000184203.8:ENST00000618156.5:chr3:195519144:-	1120	-
chr3	195519149	195519150	ENSG00000184203.8:ENST00000618156.5:chr3:195519149:-	1120	-
chr3	195516899	195516900	ENSG00000184203.8:ENST00000618156.5:chr3:195516899:-	1120	-
chr3	195516913	195516914	ENSG00000184203.8:ENST00000618156.5:chr3:195516913:-	1120	-
chr3	195516921	195516922	ENSG00000184203.8:ENST00000618156.5:chr3:195516921:-	1120	-
chr5	74634752	74634753	ENSG00000171617.15:ENST00000618628.4:chr5:74634752:-	1,14	-
chr5	176388457	176388458	ENSG00000048162.21:ENST00000614830.5:chr5:176388457:-	1,39	-
chr5	176385284	176385285	ENSG00000048162.21:ENST00000614830.5:chr5:176385284:-	1,40	-
chr5	176385311	176385312	ENSG00000048162.21:ENST00000614830.5:chr5:176385311:-	1,40	-
chr5	176384261	176384262	ENSG00000048162.21:ENST00000614830.5:chr5:176384261:-	1,40	-
chr5	176384285	176384286	ENSG00000048162.21:ENST00000614830.5:chr5:176384285:-	1,40	-
chr7	75424110	75424111	ENSG00000272391.6:ENST00000615331.5:chr7:75424110:-	1,3	-
chr8	119221668	119221669	ENSG00000147676.14:ENST00000614891.5:chr8:119221668:+	1,9	+
chr8	144409020	144409021	ENSG00000071894.17:ENST00000616140.2:chr8:144409020:-	2,9	-
chr8	144409110	144409111	ENSG00000071894.17:ENST00000616140.2:chr8:144409110:-	1,9	-
chr8	144401537	144401538	ENSG00000071894.17:ENST00000616140.2:chr8:144401537:-	2,10	-
chr8	144401049	144401050	ENSG00000071894.17:ENST00000616140.2:chr8:144401049:-	1,11	-
chr8	144400471	144400472	ENSG00000071894.17:ENST00000616140.2:chr8:144400471:-	1,11	-
chr8	144400232	144400233	ENSG00000071894.17:ENST00000616140.2:chr8:144400232:-	1,11	-
chr8	144399639	144399640	ENSG00000071894.17:ENST00000616140.2:chr8:144399639:-	1,11	-
chr8	144399641	144399642	ENSG00000071894.17:ENST00000616140.2:chr8:144399641:-	1,11	-
chr8	144399653	144399654	ENSG00000071894.17:ENST00000616140.2:chr8:144399653:-	1,11	-
chr8	144399686	144399687	ENSG00000071894.17:ENST00000616140.2:chr8:144399686:-	1,11	-
chr8	144398632	144398633	ENSG00000071894.17:ENST00000616140.2:chr8:144398632:-	1,15	-
chr8	144398350	144398351	ENSG00000071894.17:ENST00000616140.2:chr8:144398350:-	1,15	-
chr8	144398395	144398396	ENSG00000071894.17:ENST00000616140.2:chr8:144398395:-	1,15	-
chr8	144398432	144398433	ENSG00000071894.17:ENST00000616140.2:chr8:144398432:-	2,15	-
chr8	144396419	144396420	ENSG00000071894.17:ENST00000616140.2:chr8:144396419:-	1,19	-
chr8	144396473	144396474	ENSG00000071894.17:ENST00000616140.2:chr8:144396473:-	1,19	-
chr8	144395167	144395168	ENSG00000071894.17:ENST00000616140.2:chr8:144395167:-	1,19	-
chr8	144394692	144394693	ENSG00000071894.17:ENST00000616140.2:chr8:144394692:-	1,22	-
chr8	144394507	144394508	ENSG00000071894.17:ENST00000616140.2:chr8:144394507:-	1,22	-
chr8	144393338	144393339	ENSG00000071894.17:ENST00000616140.2:chr8:144393338:-	1,22	-
chr10	49941554	49941555	ENSG00000227345.9:ENST00000616448.2:chr10:49941554:-	1,19	-
chr10	49934141	49934142	ENSG00000227345.9:ENST00000616448.2:chr10:49934141:-	1,19	-
chr10	49932112	49932113	ENSG00000227345.9:ENST00000616448.2:chr10:49932112:-	1,18	-
chr10	49922561	49922562	ENSG00000227345.9:ENST00000616448.2:chr10:49922561:-	1,18	-
chr10	49843570	49843571	ENSG00000227345.9:ENST00000616448.2:chr10:49843570:-	1,18	-
chr10	49819405	49819406	ENSG00000227345.9:ENST00000616448.2:chr10:49819405:-	1,18	-
chr10	49819423	49819424	ENSG00000227345.9:ENST00000616448.2:chr10:49819423:-	1,18	-
chr11	308197	308198	ENSG00000185201.17:ENST00000616316.2:chr11:308197:+	1,36	+
chr11	308215	308216	ENSG00000185201.17:ENST00000616316.2:chr11:308215:+	1,40	+
chr11	308217	308218	ENSG00000185201.17:ENST00000616316.2:chr11:308217:+	1,40	+
chr11	308227	308228	ENSG00000185201.17:ENST00000616316.2:chr11:308227:+	3,40	+
chr11	308245	308246	ENSG00000185201.17:ENST00000616316.2:chr11:308245:+	1,40	+
chr11	308248	308249	ENSG00000185201.17:ENST00000616316.2:chr11:308248:+	1,40	+
chr11	308296	308297	ENSG00000185201.17:ENST00000616316.2:chr11:308296:+	1,41	+
chr11	308299	308300	ENSG00000185201.17:ENST00000616316.2:chr11:308299:+	1,41	+
chr11	308332	308333	ENSG00000185201.17:ENST00000616316.2:chr11:308332:+	1,42	+
chr11	308335	308336	ENSG00000185201.17:ENST00000616316.2:chr11:308335:+	1,42	+
chr11	308380	308381	ENSG00000185201.17:ENST00000616316.2:chr11:308380:+	1,42	+
chr11	308397	308398	ENSG00000185201.17:ENST00000616316.2:chr11:308397:+	1,42	+
chr11	308430	308431	ENSG00000185201.17:ENST00000616316.2:chr11:308430:+	1,42	+
chr11	309038	309039	ENSG00000185201.17:ENST00000616316.2:chr11:309038:+	2,42	+
chr11	309083	309084	ENSG00000185201.17:ENST00000616316.2:chr11:309083:+	1,42	+
chr11	309086	309087	ENSG00000185201.17:ENST00000616316.2:chr11:309086:+	1,42	+
chr11	309115	309116	ENSG00000185201.17:ENST00000616316.2:chr11:309115:+	1,42	+
chr11	309149	309150	ENSG00000185201.17:ENST00000616316.2:chr11:309149:+	1,42	+
chr14	54483683	54483684	ENSG00000197045.13:ENST00000616146.4:chr14:54483683:-	1,44	-
chr14	54481409	54481410	ENSG00000197045.13:ENST00000616146.4:chr14:54481409:-	1,44	-
chr14	54481418	54481419	ENSG00000197045.13:ENST00000616146.4:chr14:54481418:-	1,44	-
chr14	54481427	54481428	ENSG00000197045.13:ENST00000616146.4:chr14:54481427:-	1,44	-
chr14	90947495	90947496	ENSG00000100784.12:ENST00000614987.5:chr14:90947495:-	1,10	-
chr15	22947249	22947250	ENSG00000273749.5:ENST00000617928.5:chr15:22947249:-	1,28	-
chr15	22944936	22944937	ENSG00000273749.5:ENST00000617928.5:chr15:22944936:-	1,28	-
chr15	22944563	22944564	ENSG00000273749.5:ENST00000617928.5:chr15:22944563:-	1,28	-
chr15	22943213	22943214	ENSG00000273749.5:ENST00000617928.5:chr15:22943213:-	1,28	-
chr15	22943280	22943281	ENSG00000273749.5:ENST00000617928.5:chr15:22943280:-	1,28	-
chr15	22939239	22939240	ENSG00000273749.5:ENST00000617928.5:chr15:22939239:-	1,28	-
chr15	22939256	22939257	ENSG00000273749.5:ENST00000617928.5:chr15:22939256:-	1,28	-
chr15	22937115	22937116	ENSG00000273749.5:ENST00000617928.5:chr15:22937115:-	1,28	-
chr15	22933863	22933864	ENSG00000273749.5:ENST00000617928.5:chr15:22933863:-	2,28	-
chr15	22927955	22927956	ENSG00000273749.5:ENST00000617928.5:chr15:22927955:-	1,28	-
chr15	22927986	22927987	ENSG00000273749.5:ENST00000617928.5:chr15:22927986:-	1,28	-
chr15	22926065	22926066	ENSG00000273749.5:ENST00000617928.5:chr15:22926065:-	2,28	-
chr15	22918801	22918802	ENSG00000273749.5:ENST00000617928.5:chr15:22918801:-	1,28	-
chr15	22917829	22917830	ENSG00000273749.5:ENST00000617928.5:chr15:22917829:-	1,28	-
chr15	22914754	22914755	ENSG00000273749.5:ENST00000617928.5:chr15:22914754:-	1,28	-
chr15	22914764	22914765	ENSG00000273749.5:ENST00000617928.5:chr15:22914764:-	1,28	-
chr15	22914859	22914860	ENSG00000273749.5:ENST00000617928.5:chr15:22914859:-	1,28	-
chr15	22912202	22912203	ENSG00000273749.5:ENST00000617928.5:chr15:22912202:-	1,28	-
chr15	22912241	22912242	ENSG00000273749.5:ENST00000617928.5:chr15:22912241:-	1,28	-
chr15	22912271	22912272	ENSG00000273749.5:ENST00000617928.5:chr15:22912271:-	1,28	-
chr15	22910760	22910761	ENSG00000273749.5:ENST00000617928.5:chr15:22910760:-	1,28	-
chr15	22909299	22909300	ENSG00000273749.5:ENST00000617928.5:chr15:22909299:-	1,28	-
chr15	22903722	22903723	ENSG00000273749.5:ENST00000617928.5:chr15:22903722:-	1,28	-
chr15	22903728	22903729	ENSG00000273749.5:ENST00000617928.5:chr15:22903728:-	1,28	-
chr15	22903731	22903732	ENSG00000273749.5:ENST00000617928.5:chr15:22903731:-	2,28	-
chr15	22903743	22903744	ENSG00000273749.5:ENST00000617928.5:chr15:22903743:-	1,28	-
chr15	22903749	22903750	ENSG00000273749.5:ENST00000617928.5:chr15:22903749:-	2,28	-
chr15	22903843	22903844	ENSG00000273749.5:ENST00000617928.5:chr15:22903843:-	1,28	-
chr15	22903870	22903871	ENSG00000273749.5:ENST00000617928.5:chr15:22903870:-	1,28	-
chr15	22892965	22892966	ENSG00000273749.5:ENST00000617928.5:chr15:22892965:-	1,28	-
chr15	22882909	22882910	ENSG00000273749.5:ENST00000617928.5:chr15:22882909:-	1,28	-
chr15	22882972	22882973	ENSG00000273749.5:ENST00000617928.5:chr15:22882972:-	1,28	-
chr15	22873551	22873552	ENSG00000273749.5:ENST00000617928.5:chr15:22873551:-	1,28	-
chr15	22873717	22873718	ENSG00000273749.5:ENST00000617928.5:chr15:22873717:-	1,28	-
chr15	22872884	22872885	ENSG00000273749.5:ENST00000617928.5:chr15:22872884:-	2,28	-
chr15	22872922	22872923	ENSG00000273749.5:ENST00000617928.5:chr15:22872922:-	1,28	-
chr15	22870099	22870100	ENSG00000273749.5:ENST00000617928.5:chr15:22870099:-	1,27	-
chr15	75469857	75469858	ENSG00000169410.10:ENST00000618819.5:chr15:75469857:-	1,19	-
chr15	75468968	75468969	ENSG00000169410.10:ENST00000618819.5:chr15:75468968:-	1,19	-
chr17	327532	327533	ENSG00000181031.16:ENST00000618002.4:chr17:327532:-	1,34	-
chr17	319444	319445	ENSG00000181031.16:ENST00000618002.4:chr17:319444:-	1,34	-
chr17	319500	319501	ENSG00000181031.16:ENST00000618002.4:chr17:319500:-	1,34	-
chr17	219716	219717	ENSG00000181031.16:ENST00000618002.4:chr17:219716:-	1,34	-
chr17	36599048	36599049	ENSG00000278535.5:ENST00000618403.5:chr17:36599048:+	1,14	+
chr17	36600009	36600010	ENSG00000278535.5:ENST00000618403.5:chr17:36600009:+	1,14	+
chr17	36600169	36600170	ENSG00000278535.5:ENST00000618403.5:chr17:36600169:+	1,14	+
chr17	37470429	37470430	ENSG00000276234.5:ENST00000615182.5:chr17:37470429:+	1,4	+
chr17	37471110	37471111	ENSG00000276234.5:ENST00000615182.5:chr17:37471110:+	1,4	+
chr17	37643362	37643363	ENSG00000278053.5:ENST00000617633.5:chr17:37643362:-	1141	-
chr17	37643369	37643370	ENSG00000278053.5:ENST00000617633.5:chr17:37643369:-	1141	-
chr17	37643398	37643399	ENSG00000278053.5:ENST00000617633.5:chr17:37643398:-	1141	-
chr17	37642114	37642115	ENSG00000278053.5:ENST00000617633.5:chr17:37642114:-	1141	-
chr17	37642254	37642255	ENSG00000278053.5:ENST00000617633.5:chr17:37642254:-	1141	-
chr17	37642287	37642288	ENSG00000278053.5:ENST00000617633.5:chr17:37642287:-	1141	-
chr17	37632189	37632190	ENSG00000278053.5:ENST00000617633.5:chr17:37632189:-	2140	-
chr17	37632274	37632275	ENSG00000278053.5:ENST00000617633.5:chr17:37632274:-	1140	-
chr17	37630046	37630047	ENSG00000278053.5:ENST00000617633.5:chr17:37630046:-	1140	-
chr17	37630129	37630130	ENSG00000278053.5:ENST00000617633.5:chr17:37630129:-	1140	-
chr17	37630144	37630145	ENSG00000278053.5:ENST00000617633.5:chr17:37630144:-	1140	-
chr17	37630156	37630157	ENSG00000278053.5:ENST00000617633.5:chr17:37630156:-	1140	-
chr17	37630163	37630164	ENSG00000278053.5:ENST00000617633.5:chr17:37630163:-	1140	-
chr17	37628574	37628575	ENSG00000278053.5:ENST00000617633.5:chr17:37628574:-	1140	-
chr17	37628580	37628581	ENSG00000278053.5:ENST00000617633.5:chr17:37628580:-	1140	-
chr17	37628581	37628582	ENSG00000278053.5:ENST00000617633.5:chr17:37628581:-	1140	-
chr17	37628623	37628624	ENSG00000278053.5:ENST00000617633.5:chr17:37628623:-	1140	-
chr17	37628637	37628638	ENSG00000278053.5:ENST00000617633.5:chr17:37628637:-	1140	-
chr17	37626833	37626834	ENSG00000278053.5:ENST00000617633.5:chr17:37626833:-	1140	-
chr17	37626002	37626003	ENSG00000278053.5:ENST00000617633.5:chr17:37626002:-	1140	-
chr17	37626071	37626072	ENSG00000278053.5:ENST00000617633.5:chr17:37626071:-	1140	-
chr17	37621465	37621466	ENSG00000278053.5:ENST00000617633.5:chr17:37621465:-	1141	-
chr17	37621514	37621515	ENSG00000278053.5:ENST00000617633.5:chr17:37621514:-	1141	-
chr17	37621209	37621210	ENSG00000278053.5:ENST00000617633.5:chr17:37621209:-	1141	-
chr17	37621221	37621222	ENSG00000278053.5:ENST00000617633.5:chr17:37621221:-	1141	-
chr17	37621238	37621239	ENSG00000278053.5:ENST00000617633.5:chr17:37621238:-	1141	-
chr17	37621268	37621269	ENSG00000278053.5:ENST00000617633.5:chr17:37621268:-	1141	-
chr17	37619771	37619772	ENSG00000278053.5:ENST00000617633.5:chr17:37619771:-	1141	-
chr17	37618292	37618293	ENSG00000278053.5:ENST00000617633.5:chr17:37618292:-	1,91	-
chr17	37618314	37618315	ENSG00000278053.5:ENST00000617633.5:chr17:37618314:-	1,91	-
chr17	37614304	37614305	ENSG00000278053.5:ENST00000617633.5:chr17:37614304:-	1,91	-
chr17	38806301	38806302	ENSG00000273559.5:ENST00000614790.5:chr17:38806301:-	1,44	-
chr19	1095291	1095292	ENSG00000099817.12:ENST00000615234.5:chr19:1095291:-	1663	-
chr19	1095295	1095296	ENSG00000099817.12:ENST00000615234.5:chr19:1095295:-	2663	-
chr19	1093910	1093911	ENSG00000099817.12:ENST00000615234.5:chr19:1093910:-	1664	-
chr19	1093947	1093948	ENSG00000099817.12:ENST00000615234.5:chr19:1093947:-	1664	-
chr19	1093972	1093973	ENSG00000099817.12:ENST00000615234.5:chr19:1093972:-	1664	-
chr19	1093977	1093978	ENSG00000099817.12:ENST00000615234.5:chr19:1093977:-	1663	-
chr19	1094027	1094028	ENSG00000099817.12:ENST00000615234.5:chr19:1094027:-	2664	-
chr19	1094032	1094033	ENSG00000099817.12:ENST00000615234.5:chr19:1094032:-	1663	-
chr19	1094038	1094039	ENSG00000099817.12:ENST00000615234.5:chr19:1094038:-	1663	-
chr19	1094056	1094057	ENSG00000099817.12:ENST00000615234.5:chr19:1094056:-	1663	-
chr19	1091860	1091861	ENSG00000099817.12:ENST00000615234.5:chr19:1091860:-	1665	-
chr19	1091882	1091883	ENSG00000099817.12:ENST00000615234.5:chr19:1091882:-	1664	-
chr19	1091890	1091891	ENSG00000099817.12:ENST00000615234.5:chr19:1091890:-	1664	-
chr19	1090969	1090970	ENSG00000099817.12:ENST00000615234.5:chr19:1090969:-	1667	-
chr19	1090979	1090980	ENSG00000099817.12:ENST00000615234.5:chr19:1090979:-	2667	-
chr19	1090986	1090987	ENSG00000099817.12:ENST00000615234.5:chr19:1090986:-	1667	-
chr19	1090090	1090091	ENSG00000099817.12:ENST00000615234.5:chr19:1090090:-	1665	-
chr19	1090130	1090131	ENSG00000099817.12:ENST00000615234.5:chr19:1090130:-	1667	-
chr19	1089942	1089943	ENSG00000099817.12:ENST00000615234.5:chr19:1089942:-	1667	-
chr19	1089539	1089540	ENSG00000099817.12:ENST00000615234.5:chr19:1089539:-	1667	-
chr19	58186951	58186952	ENSG00000171606.18:ENST00000617501.5:chr19:58186951:+	1,81	+
chr19	58206757	58206758	ENSG00000171606.18:ENST00000617501.5:chr19:58206757:+	1,82	+
chr19	58206808	58206809	ENSG00000171606.18:ENST00000617501.5:chr19:58206808:+	1,82	+
chr19	58207190	58207191	ENSG00000171606.18:ENST00000617501.5:chr19:58207190:+	1,82	+
chr19	58210051	58210052	ENSG00000171606.18:ENST00000617501.5:chr19:58210051:+	1,81	+
chr19	58211591	58211592	ENSG00000171606.18:ENST00000617501.5:chr19:58211591:+	2,82	+
chr19	58212206	58212207	ENSG00000171606.18:ENST00000617501.5:chr19:58212206:+	1,82	+
chr19	58212243	58212244	ENSG00000171606.18:ENST00000617501.5:chr19:58212243:+	1,82	+
chr19	58212480	58212481	ENSG00000171606.18:ENST00000617501.5:chr19:58212480:+	1,82	+
chr19	58212485	58212486	ENSG00000171606.18:ENST00000617501.5:chr19:58212485:+	1,82	+
chr19	58212525	58212526	ENSG00000171606.18:ENST00000617501.5:chr19:58212525:+	1,82	+
chr20	13782580	13782581	ENSG00000089048.15:ENST00000617257.2:chr20:13782580:-	1,50	-
chr20	13782680	13782681	ENSG00000089048.15:ENST00000617257.2:chr20:13782680:-	1,52	-
chr20	13769944	13769945	ENSG00000089048.15:ENST00000617257.2:chr20:13769944:-	1,50	-
chr20	13766896	13766897	ENSG00000089048.15:ENST00000617257.2:chr20:13766896:-	1,50	-
chr20	13714928	13714929	ENSG00000089048.15:ENST00000617257.2:chr20:13714928:-	1,10	-
chr21	5148264	5148265	ENSG00000275464.5:ENST00000617716.4:chr21:5148264:-	3195	-
chr21	5148272	5148273	ENSG00000275464.5:ENST00000617716.4:chr21:5148272:-	1195	-
chr21	5148291	5148292	ENSG00000275464.5:ENST00000617716.4:chr21:5148291:-	1195	-
chr21	5147792	5147793	ENSG00000275464.5:ENST00000617716.4:chr21:5147792:-	1198	-
chr21	5147293	5147294	ENSG00000275464.5:ENST00000617716.4:chr21:5147293:-	1199	-
chr21	5147305	5147306	ENSG00000275464.5:ENST00000617716.4:chr21:5147305:-	2199	-
chr21	5147352	5147353	ENSG00000275464.5:ENST00000617716.4:chr21:5147352:-	1198	-
chr21	5147391	5147392	ENSG00000275464.5:ENST00000617716.4:chr21:5147391:-	1198	-
chr21	5147417	5147418	ENSG00000275464.5:ENST00000617716.4:chr21:5147417:-	1198	-
chr21	5146666	5146667	ENSG00000275464.5:ENST00000617716.4:chr21:5146666:-	1211	-
chr21	5146732	5146733	ENSG00000275464.5:ENST00000617716.4:chr21:5146732:-	1210	-
chr21	5146744	5146745	ENSG00000275464.5:ENST00000617716.4:chr21:5146744:-	1207	-
chr21	5146768	5146769	ENSG00000275464.5:ENST00000617716.4:chr21:5146768:-	1208	-
chr21	5146185	5146186	ENSG00000275464.5:ENST00000617716.4:chr21:5146185:-	2213	-
chr21	5146208	5146209	ENSG00000275464.5:ENST00000617716.4:chr21:5146208:-	1213	-
chr21	5146216	5146217	ENSG00000275464.5:ENST00000617716.4:chr21:5146216:-	1213	-
chr21	5146356	5146357	ENSG00000275464.5:ENST00000617716.4:chr21:5146356:-	2211	-
chr21	5146358	5146359	ENSG00000275464.5:ENST00000617716.4:chr21:5146358:-	1211	-
chr21	5144130	5144131	ENSG00000275464.5:ENST00000617716.4:chr21:5144130:-	1215	-
chr21	5144156	5144157	ENSG00000275464.5:ENST00000617716.4:chr21:5144156:-	1215	-
chr21	5144167	5144168	ENSG00000275464.5:ENST00000617716.4:chr21:5144167:-	2215	-
chr21	5144224	5144225	ENSG00000275464.5:ENST00000617716.4:chr21:5144224:-	1214	-
chr21	5144230	5144231	ENSG00000275464.5:ENST00000617716.4:chr21:5144230:-	1214	-
chr21	5143286	5143287	ENSG00000275464.5:ENST00000617716.4:chr21:5143286:-	1216	-
chr21	5142537	5142538	ENSG00000275464.5:ENST00000617716.4:chr21:5142537:-	1221	-
chr21	5142597	5142598	ENSG00000275464.5:ENST00000617716.4:chr21:5142597:-	1219	-
chr21	5142624	5142625	ENSG00000275464.5:ENST00000617716.4:chr21:5142624:-	1219	-
chr21	5141573	5141574	ENSG00000275464.5:ENST00000617716.4:chr21:5141573:-	1224	-
chr21	5141624	5141625	ENSG00000275464.5:ENST00000617716.4:chr21:5141624:-	1223	-
chr21	5141292	5141293	ENSG00000275464.5:ENST00000617716.4:chr21:5141292:-	2226	-
chr21	5141337	5141338	ENSG00000275464.5:ENST00000617716.4:chr21:5141337:-	1224	-
chr21	5140972	5140973	ENSG00000275464.5:ENST00000617716.4:chr21:5140972:-	1226	-
chr21	5140992	5140993	ENSG00000275464.5:ENST00000617716.4:chr21:5140992:-	1226	-
chr21	5141017	5141018	ENSG00000275464.5:ENST00000617716.4:chr21:5141017:-	1226	-
chr21	5141056	5141057	ENSG00000275464.5:ENST00000617716.4:chr21:5141056:-	1226	-
chr21	5141088	5141089	ENSG00000275464.5:ENST00000617716.4:chr21:5141088:-	1226	-
chr21	5139721	5139722	ENSG00000275464.5:ENST00000617716.4:chr21:5139721:-	1226	-
chr21	5139748	5139749	ENSG00000275464.5:ENST00000617716.4:chr21:5139748:-	1226	-
chr21	5139756	5139757	ENSG00000275464.5:ENST00000617716.4:chr21:5139756:-	1226	-
chr21	5139781	5139782	ENSG00000275464.5:ENST00000617716.4:chr21:5139781:-	2226	-
chr21	5139792	5139793	ENSG00000275464.5:ENST00000617716.4:chr21:5139792:-	1226	-
chr21	5139807	5139808	ENSG00000275464.5:ENST00000617716.4:chr21:5139807:-	1226	-
chr21	5139827	5139828	ENSG00000275464.5:ENST00000617716.4:chr21:5139827:-	1226	-
chr21	5139865	5139866	ENSG00000275464.5:ENST00000617716.4:chr21:5139865:-	1226	-
chr21	5137431	5137432	ENSG00000275464.5:ENST00000617716.4:chr21:5137431:-	1227	-
chr21	5137452	5137453	ENSG00000275464.5:ENST00000617716.4:chr21:5137452:-	1226	-
chr21	5133950	5133951	ENSG00000275464.5:ENST00000617716.4:chr21:5133950:-	1226	-
chr21	5133981	5133982	ENSG00000275464.5:ENST00000617716.4:chr21:5133981:-	1226	-
chr21	5134067	5134068	ENSG00000275464.5:ENST00000617716.4:chr21:5134067:-	1225	-
chr21	5134095	5134096	ENSG00000275464.5:ENST00000617716.4:chr21:5134095:-	1225	-
chr21	5133656	5133657	ENSG00000275464.5:ENST00000617716.4:chr21:5133656:-	1226	-
chr21	5133674	5133675	ENSG00000275464.5:ENST00000617716.4:chr21:5133674:-	2226	-
chr21	5133710	5133711	ENSG00000275464.5:ENST00000617716.4:chr21:5133710:-	1226	-
chr21	5133775	5133776	ENSG00000275464.5:ENST00000617716.4:chr21:5133775:-	2226	-
chr21	5133466	5133467	ENSG00000275464.5:ENST00000617716.4:chr21:5133466:-	1228	-
chr21	5133469	5133470	ENSG00000275464.5:ENST00000617716.4:chr21:5133469:-	1228	-
chr21	5133474	5133475	ENSG00000275464.5:ENST00000617716.4:chr21:5133474:-	1228	-
chr21	5131386	5131387	ENSG00000275464.5:ENST00000617716.4:chr21:5131386:-	1228	-
chr21	5131439	5131440	ENSG00000275464.5:ENST00000617716.4:chr21:5131439:-	1228	-
chr21	5131454	5131455	ENSG00000275464.5:ENST00000617716.4:chr21:5131454:-	1225	-
chr22	30407120	30407121	ENSG00000100003.18:ENST00000615189.5:chr22:30407120:+	1,41	+
chr22	30407129	30407130	ENSG00000100003.18:ENST00000615189.5:chr22:30407129:+	1,41	+
chr22	30407455	30407456	ENSG00000100003.18:ENST00000615189.5:chr22:30407455:+	1,41	+
chr22	30409428	30409429	ENSG00000100003.18:ENST00000615189.5:chr22:30409428:+	1,41	+
chr22	30409461	30409462	ENSG00000100003.18:ENST00000615189.5:chr22:30409461:+	1,41	+
chr22	30415955	30415956	ENSG00000100003.18:ENST00000615189.5:chr22:30415955:+	1,41	+
chr22	30415964	30415965	ENSG00000100003.18:ENST00000615189.5:chr22:30415964:+	1,41	+
chr22	30416322	30416323	ENSG00000100003.18:ENST00000615189.5:chr22:30416322:+	1,41	+
chr22	30416350	30416351	ENSG00000100003.18:ENST00000615189.5:chr22:30416350:+	1,41	+
chr22	30422311	30422312	ENSG00000100003.18:ENST00000615189.5:chr22:30422311:+	1,41	+
chrX	46679718	46679719	ENSG00000065923.10:ENST00000616978.5:chrX:46679718:-	1,13	-
chrX	46669610	46669611	ENSG00000065923.10:ENST00000616978.5:chrX:46669610:-	1,13	-
chrX	46662074	46662075	ENSG00000065923.10:ENST00000616978.5:chrX:46662074:-	1,13	-
chrX	46613356	46613357	ENSG00000065923.10:ENST00000616978.5:chrX:46613356:-	1,13	-
chr1	28743628	28743629	ENSG00000198492.16:ENST00000541996.5:chr1:28743628:+	1,10	+
chr1	28743956	28743957	ENSG00000198492.16:ENST00000541996.5:chr1:28743956:+	1,10	+
chr1	247157147	247157148	ENSG00000196418.13:ENST00000543802.3:chr1:247157147:-	1,6	-
chr2	63595509	63595510	ENSG00000014641.21:ENST00000544381.4:chr2:63595509:+	1,5	+
chr2	63599215	63599216	ENSG00000014641.21:ENST00000544381.4:chr2:63599215:+	1,5	+
chr2	63605321	63605322	ENSG00000014641.21:ENST00000544381.4:chr2:63605321:+	1,5	+
chr2	63606006	63606007	ENSG00000014641.21:ENST00000544381.4:chr2:63606006:+	1,5	+
chr2	112542619	112542620	ENSG00000125630.16:ENST00000541869.5:chr2:112542619:+	1,14	+
chr2	112542637	112542638	ENSG00000125630.16:ENST00000541869.5:chr2:112542637:+	1,14	+
chr2	112550905	112550906	ENSG00000125630.16:ENST00000541869.5:chr2:112550905:+	1,14	+
chr2	112551790	112551791	ENSG00000125630.16:ENST00000541869.5:chr2:112551790:+	1,14	+
chr2	112551906	112551907	ENSG00000125630.16:ENST00000541869.5:chr2:112551906:+	1,14	+
chr2	112552792	112552793	ENSG00000125630.16:ENST00000541869.5:chr2:112552792:+	1,14	+
chr2	112559368	112559369	ENSG00000125630.16:ENST00000541869.5:chr2:112559368:+	1,14	+
chr2	112568750	112568751	ENSG00000125630.16:ENST00000541869.5:chr2:112568750:+	1,14	+
chr3	172710863	172710864	ENSG00000144959.11:ENST00000538775.5:chr3:172710863:-	1,19	-
chr3	172710900	172710901	ENSG00000144959.11:ENST00000538775.5:chr3:172710900:-	1,19	-
chr3	172711019	172711020	ENSG00000144959.11:ENST00000538775.5:chr3:172711019:-	1,19	-
chr3	172633587	172633588	ENSG00000144959.11:ENST00000538775.5:chr3:172633587:-	1,19	-
chr3	172633645	172633646	ENSG00000144959.11:ENST00000538775.5:chr3:172633645:-	1,19	-
chr3	172633918	172633919	ENSG00000144959.11:ENST00000538775.5:chr3:172633918:-	1,19	-
chr3	172633998	172633999	ENSG00000144959.11:ENST00000538775.5:chr3:172633998:-	1,19	-
chr6	170584335	170584336	ENSG00000071994.11:ENST00000541970.6:chr6:170584335:-	1,99	-
chr6	170583568	170583569	ENSG00000071994.11:ENST00000541970.6:chr6:170583568:-	1,99	-
chr6	170578887	170578888	ENSG00000071994.11:ENST00000541970.6:chr6:170578887:-	1100	-
chr6	170577610	170577611	ENSG00000071994.11:ENST00000541970.6:chr6:170577610:-	1100	-
chr8	63186675	63186676	ENSG00000185728.17:ENST00000539294.6:chr8:63186675:+	1,24	+
chr8	63187017	63187018	ENSG00000185728.17:ENST00000539294.6:chr8:63187017:+	1,24	+
chr8	63187544	63187545	ENSG00000185728.17:ENST00000539294.6:chr8:63187544:+	1,24	+
chr9	32408645	32408646	ENSG00000122729.19:ENST00000541043.5:chr9:32408645:+	1,4	+
chr9	32418452	32418453	ENSG00000122729.19:ENST00000541043.5:chr9:32418452:+	1,4	+
chr9	36599459	36599460	ENSG00000165304.8:ENST00000541717.4:chr9:36599459:+	1,6	+
chr9	36665365	36665366	ENSG00000165304.8:ENST00000541717.4:chr9:36665365:+	1,7	+
chr9	36677203	36677204	ENSG00000165304.8:ENST00000541717.4:chr9:36677203:+	1,7	+
chr10	12172832	12172833	ENSG00000165609.13:ENST00000537776.5:chr10:12172832:-	1,19	-
chr10	12167745	12167746	ENSG00000165609.13:ENST00000537776.5:chr10:12167745:-	1,19	-
chr11	64317281	64317282	ENSG00000173113.7:ENST00000544844.6:chr11:64317281:-	1206	-
chr11	64317320	64317321	ENSG00000173113.7:ENST00000544844.6:chr11:64317320:-	2206	-
chr11	64317360	64317361	ENSG00000173113.7:ENST00000544844.6:chr11:64317360:-	1206	-
chr11	64317062	64317063	ENSG00000173113.7:ENST00000544844.6:chr11:64317062:-	1206	-
chr11	64317140	64317141	ENSG00000173113.7:ENST00000544844.6:chr11:64317140:-	1206	-
chr11	66796316	66796317	ENSG00000173715.18:ENST00000540737.7:chr11:66796316:+	1,14	+
chr11	66838403	66838404	ENSG00000173715.18:ENST00000540737.7:chr11:66838403:+	1,16	+
chr11	66842989	66842990	ENSG00000173715.18:ENST00000540737.7:chr11:66842989:+	1,16	+
chr11	119093216	119093217	ENSG00000256269.10:ENST00000544387.5:chr11:119093216:+	1,3	+
chr12	6200552	6200553	ENSG00000010278.15:ENST00000538834.6:chr12:6200552:+	1106	+
chr12	6200555	6200556	ENSG00000010278.15:ENST00000538834.6:chr12:6200555:+	2106	+
chr12	6225472	6225473	ENSG00000010278.15:ENST00000538834.6:chr12:6225472:+	2106	+
chr12	6225474	6225475	ENSG00000010278.15:ENST00000538834.6:chr12:6225474:+	1106	+
chr12	6225529	6225530	ENSG00000010278.15:ENST00000538834.6:chr12:6225529:+	1106	+
chr12	6232726	6232727	ENSG00000010278.15:ENST00000538834.6:chr12:6232726:+	1106	+
chr12	6235254	6235255	ENSG00000010278.15:ENST00000538834.6:chr12:6235254:+	1106	+
chr12	6235262	6235263	ENSG00000010278.15:ENST00000538834.6:chr12:6235262:+	1106	+
chr12	6235269	6235270	ENSG00000010278.15:ENST00000538834.6:chr12:6235269:+	1106	+
chr12	6235551	6235552	ENSG00000010278.15:ENST00000538834.6:chr12:6235551:+	1106	+
chr12	31083866	31083867	ENSG00000013573.17:ENST00000542838.6:chr12:31083866:+	1,37	+
chr12	31083895	31083896	ENSG00000013573.17:ENST00000542838.6:chr12:31083895:+	1,37	+
chr12	31089455	31089456	ENSG00000013573.17:ENST00000542838.6:chr12:31089455:+	1,38	+
chr12	31089486	31089487	ENSG00000013573.17:ENST00000542838.6:chr12:31089486:+	1,35	+
chr12	31089958	31089959	ENSG00000013573.17:ENST00000542838.6:chr12:31089958:+	1,38	+
chr12	31090078	31090079	ENSG00000013573.17:ENST00000542838.6:chr12:31090078:+	1,38	+
chr12	31090086	31090087	ENSG00000013573.17:ENST00000542838.6:chr12:31090086:+	1,38	+
chr12	31096659	31096660	ENSG00000013573.17:ENST00000542838.6:chr12:31096659:+	1,38	+
chr12	31097902	31097903	ENSG00000013573.17:ENST00000542838.6:chr12:31097902:+	1,38	+
chr12	31101063	31101064	ENSG00000013573.17:ENST00000542838.6:chr12:31101063:+	1,38	+
chr12	31101101	31101102	ENSG00000013573.17:ENST00000542838.6:chr12:31101101:+	1,38	+
chr12	31103822	31103823	ENSG00000013573.17:ENST00000542838.6:chr12:31103822:+	3,38	+
chr12	46201134	46201135	ENSG00000111371.16:ENST00000546893.5:chr12:46201134:-	1,3	-
chr12	51000361	51000362	ENSG00000110911.17:ENST00000546636.5:chr12:51000361:-	1,4	-
chr12	56273173	56273174	ENSG00000062485.19:ENST00000548567.5:chr12:56273173:-	1,9	-
chr12	57607579	57607580	ENSG00000178498.16:ENST00000548804.5:chr12:57607579:+	1,4	+
chr12	100205680	100205681	ENSG00000075089.10:ENST00000548180.5:chr12:100205680:+	1,4	+
chr12	102061260	102061261	ENSG00000120860.11:ENST00000545679.5:chr12:102061260:-	1,19	-
chr12	102046078	102046079	ENSG00000120860.11:ENST00000545679.5:chr12:102046078:-	1,19	-
chr12	102044106	102044107	ENSG00000120860.11:ENST00000545679.5:chr12:102044106:-	1,19	-
chr12	102039884	102039885	ENSG00000120860.11:ENST00000545679.5:chr12:102039884:-	1,19	-
chr12	102039921	102039922	ENSG00000120860.11:ENST00000545679.5:chr12:102039921:-	1,19	-
chr12	102039965	102039966	ENSG00000120860.11:ENST00000545679.5:chr12:102039965:-	1,19	-
chr12	113186993	113186994	ENSG00000139405.16:ENST00000548278.2:chr12:113186993:+	1,91	+
chr12	113191333	113191334	ENSG00000139405.16:ENST00000548278.2:chr12:113191333:+	1,91	+
chr12	113191362	113191363	ENSG00000139405.16:ENST00000548278.2:chr12:113191362:+	1,91	+
chr12	113191472	113191473	ENSG00000139405.16:ENST00000548278.2:chr12:113191472:+	1,91	+
chr12	113191557	113191558	ENSG00000139405.16:ENST00000548278.2:chr12:113191557:+	1,91	+
chr12	113191608	113191609	ENSG00000139405.16:ENST00000548278.2:chr12:113191608:+	1,90	+
chr12	113191619	113191620	ENSG00000139405.16:ENST00000548278.2:chr12:113191619:+	1,91	+
chr12	113191643	113191644	ENSG00000139405.16:ENST00000548278.2:chr12:113191643:+	1,91	+
chr12	113191728	113191729	ENSG00000139405.16:ENST00000548278.2:chr12:113191728:+	2,91	+
chr12	121346945	121346946	ENSG00000089053.13:ENST00000541887.5:chr12:121346945:-	1151	-
chr12	121345899	121345900	ENSG00000089053.13:ENST00000541887.5:chr12:121345899:-	1151	-
chr12	121345968	121345969	ENSG00000089053.13:ENST00000541887.5:chr12:121345968:-	1151	-
chr12	121346016	121346017	ENSG00000089053.13:ENST00000541887.5:chr12:121346016:-	1151	-
chr12	121346022	121346023	ENSG00000089053.13:ENST00000541887.5:chr12:121346022:-	1151	-
chr12	121342004	121342005	ENSG00000089053.13:ENST00000541887.5:chr12:121342004:-	1151	-
chr12	121342013	121342014	ENSG00000089053.13:ENST00000541887.5:chr12:121342013:-	2151	-
chr12	121342028	121342029	ENSG00000089053.13:ENST00000541887.5:chr12:121342028:-	1151	-
chr12	121342054	121342055	ENSG00000089053.13:ENST00000541887.5:chr12:121342054:-	1151	-
chr12	121337340	121337341	ENSG00000089053.13:ENST00000541887.5:chr12:121337340:-	1151	-
chr12	121337352	121337353	ENSG00000089053.13:ENST00000541887.5:chr12:121337352:-	1151	-
chr12	121337356	121337357	ENSG00000089053.13:ENST00000541887.5:chr12:121337356:-	1151	-
chr12	121337366	121337367	ENSG00000089053.13:ENST00000541887.5:chr12:121337366:-	2151	-
chr12	121335559	121335560	ENSG00000089053.13:ENST00000541887.5:chr12:121335559:-	1151	-
chr12	121335666	121335667	ENSG00000089053.13:ENST00000541887.5:chr12:121335666:-	1151	-
chr12	121335668	121335669	ENSG00000089053.13:ENST00000541887.5:chr12:121335668:-	1151	-
chr12	121335670	121335671	ENSG00000089053.13:ENST00000541887.5:chr12:121335670:-	2151	-
chr12	121335690	121335691	ENSG00000089053.13:ENST00000541887.5:chr12:121335690:-	1151	-
chr12	121335699	121335700	ENSG00000089053.13:ENST00000541887.5:chr12:121335699:-	1151	-
chr12	121335716	121335717	ENSG00000089053.13:ENST00000541887.5:chr12:121335716:-	1151	-
chr12	121331426	121331427	ENSG00000089053.13:ENST00000541887.5:chr12:121331426:-	1151	-
chr12	121330596	121330597	ENSG00000089053.13:ENST00000541887.5:chr12:121330596:-	1151	-
chr12	121328353	121328354	ENSG00000089053.13:ENST00000541887.5:chr12:121328353:-	1151	-
chr12	121328375	121328376	ENSG00000089053.13:ENST00000541887.5:chr12:121328375:-	1151	-
chr12	121328417	121328418	ENSG00000089053.13:ENST00000541887.5:chr12:121328417:-	1151	-
chr12	121328431	121328432	ENSG00000089053.13:ENST00000541887.5:chr12:121328431:-	1151	-
chr12	121327152	121327153	ENSG00000089053.13:ENST00000541887.5:chr12:121327152:-	1151	-
chr12	121327214	121327215	ENSG00000089053.13:ENST00000541887.5:chr12:121327214:-	1151	-
chr12	121327228	121327229	ENSG00000089053.13:ENST00000541887.5:chr12:121327228:-	1151	-
chr12	121319719	121319720	ENSG00000089053.13:ENST00000541887.5:chr12:121319719:-	1151	-
chr12	121318515	121318516	ENSG00000089053.13:ENST00000541887.5:chr12:121318515:-	1151	-
chr12	121318525	121318526	ENSG00000089053.13:ENST00000541887.5:chr12:121318525:-	1151	-
chr12	121318286	121318287	ENSG00000089053.13:ENST00000541887.5:chr12:121318286:-	1151	-
chr12	121318385	121318386	ENSG00000089053.13:ENST00000541887.5:chr12:121318385:-	1151	-
chr12	121309722	121309723	ENSG00000089053.13:ENST00000541887.5:chr12:121309722:-	2151	-
chr12	121309856	121309857	ENSG00000089053.13:ENST00000541887.5:chr12:121309856:-	1151	-
chr12	121308484	121308485	ENSG00000089053.13:ENST00000541887.5:chr12:121308484:-	1151	-
chr12	121308536	121308537	ENSG00000089053.13:ENST00000541887.5:chr12:121308536:-	1151	-
chr12	121308599	121308600	ENSG00000089053.13:ENST00000541887.5:chr12:121308599:-	1151	-
chr12	121308674	121308675	ENSG00000089053.13:ENST00000541887.5:chr12:121308674:-	1151	-
chr14	50931760	50931761	ENSG00000100504.17:ENST00000544180.6:chr14:50931760:-	1,32	-
chr14	50924064	50924065	ENSG00000100504.17:ENST00000544180.6:chr14:50924064:-	1,32	-
chr14	50920588	50920589	ENSG00000100504.17:ENST00000544180.6:chr14:50920588:-	1,32	-
chr14	50920609	50920610	ENSG00000100504.17:ENST00000544180.6:chr14:50920609:-	1,32	-
chr14	50915936	50915937	ENSG00000100504.17:ENST00000544180.6:chr14:50915936:-	3,32	-
chr14	50915938	50915939	ENSG00000100504.17:ENST00000544180.6:chr14:50915938:-	1,32	-
chr14	50915341	50915342	ENSG00000100504.17:ENST00000544180.6:chr14:50915341:-	1,32	-
chr14	50912156	50912157	ENSG00000100504.17:ENST00000544180.6:chr14:50912156:-	2,32	-
chr14	50911996	50911997	ENSG00000100504.17:ENST00000544180.6:chr14:50911996:-	1,32	-
chr14	50912007	50912008	ENSG00000100504.17:ENST00000544180.6:chr14:50912007:-	1,32	-
chr14	50911769	50911770	ENSG00000100504.17:ENST00000544180.6:chr14:50911769:-	1,32	-
chr14	50909902	50909903	ENSG00000100504.17:ENST00000544180.6:chr14:50909902:-	1,32	-
chr14	50909941	50909942	ENSG00000100504.17:ENST00000544180.6:chr14:50909941:-	1,32	-
chr14	50908846	50908847	ENSG00000100504.17:ENST00000544180.6:chr14:50908846:-	1,32	-
chr14	50905499	50905500	ENSG00000100504.17:ENST00000544180.6:chr14:50905499:-	1,32	-
chr14	64442265	64442266	ENSG00000100714.17:ENST00000545908.6:chr14:64442265:+	1,9	+
chr14	64459923	64459924	ENSG00000100714.17:ENST00000545908.6:chr14:64459923:+	1,10	+
chr14	105272874	105272875	ENSG00000185024.17:ENST00000547530.7:chr14:105272874:-	1,23	-
chr14	105211278	105211279	ENSG00000185024.17:ENST00000547530.7:chr14:105211278:-	1,20	-
chr16	30651814	30651815	ENSG00000156858.12:ENST00000542965.2:chr16:30651814:+	1,2	+
chr16	30654254	30654255	ENSG00000156858.12:ENST00000542965.2:chr16:30654254:+	1,2	+
chr16	30655041	30655042	ENSG00000156858.12:ENST00000542965.2:chr16:30655041:+	1,2	+
chr17	18252508	18252509	ENSG00000177731.16:ENST00000545457.6:chr17:18252508:-	1,7	-
chr17	18248852	18248853	ENSG00000177731.16:ENST00000545457.6:chr17:18248852:-	1,8	-
chr17	18247306	18247307	ENSG00000177731.16:ENST00000545457.6:chr17:18247306:-	1,8	-
chr17	18246342	18246343	ENSG00000177731.16:ENST00000545457.6:chr17:18246342:-	1,8	-
chr17	18245596	18245597	ENSG00000177731.16:ENST00000545457.6:chr17:18245596:-	1,8	-
chr19	34172694	34172695	ENSG00000257103.9:ENST00000544216.8:chr19:34172694:+	1,59	+
chr19	34194593	34194594	ENSG00000257103.9:ENST00000544216.8:chr19:34194593:+	1,60	+
chr19	34215633	34215634	ENSG00000257103.9:ENST00000544216.8:chr19:34215633:+	1,60	+
chr19	34219526	34219527	ENSG00000257103.9:ENST00000544216.8:chr19:34219526:+	1,60	+
chr19	34227369	34227370	ENSG00000257103.9:ENST00000544216.8:chr19:34227369:+	1,59	+
chr19	39480876	39480877	ENSG00000105197.11:ENST00000544017.5:chr19:39480876:+	1160	+
chr19	39480916	39480917	ENSG00000105197.11:ENST00000544017.5:chr19:39480916:+	1166	+
chr19	39480923	39480924	ENSG00000105197.11:ENST00000544017.5:chr19:39480923:+	1167	+
chr19	39480932	39480933	ENSG00000105197.11:ENST00000544017.5:chr19:39480932:+	1167	+
chr19	39481910	39481911	ENSG00000105197.11:ENST00000544017.5:chr19:39481910:+	1168	+
chr19	39481936	39481937	ENSG00000105197.11:ENST00000544017.5:chr19:39481936:+	1168	+
chr19	39481985	39481986	ENSG00000105197.11:ENST00000544017.5:chr19:39481985:+	1168	+
chr19	39482028	39482029	ENSG00000105197.11:ENST00000544017.5:chr19:39482028:+	1168	+
chr19	39485551	39485552	ENSG00000105197.11:ENST00000544017.5:chr19:39485551:+	1168	+
chr19	39485747	39485748	ENSG00000105197.11:ENST00000544017.5:chr19:39485747:+	1168	+
chr19	39485778	39485779	ENSG00000105197.11:ENST00000544017.5:chr19:39485778:+	1168	+
chr19	39485795	39485796	ENSG00000105197.11:ENST00000544017.5:chr19:39485795:+	2168	+
chr19	39486193	39486194	ENSG00000105197.11:ENST00000544017.5:chr19:39486193:+	2168	+
chr19	39486410	39486411	ENSG00000105197.11:ENST00000544017.5:chr19:39486410:+	1168	+
[truncated: 137,828 more rows]

## Sheet: NT_rep2
chr1	156115087	156115088	ENSG00000160789.24:ENST00000368300.9:chr1:156115087:+	1,52	+
[truncated: 126,526 more rows]
