# Supplementary material for: Long-read Ribo-STAMP simultaneously measures transcription and translation with isoform resolution
Source: HighWire-hosted journal article supplement (doi:10.1101/gr.279176.124), 2024-06-21
Supplement: Supplemental_Table_3.xlsx [file Supplemental_Table_3.xlsx]

## Sheet: Sheet1
Supplemental Table 3: Western blot quantification for GRK6
	GAPDH	GRK6 - small	GRK6 - large	HIF1A	GRK6 small norm GAPDH	GRK6 large norm GAPDH	GRK6 small norm to 0h	GRK6 large norm to 0h
0 Cocl2	9186.54	4221.52	10887.7	623.263	0.459533	1.18518	1	1
24 Cocl2	9489.49	8487.25	11981.3	3531.09	0.894384	1.26258	1.94629	1.06531
48 CoCl2	9918.78	6838.25	10910.4	18853.1	0.689424	1.09998	1.50027	0.928108
